# Supplementary material for: Isolation and NMR Scaling Factors for the Structure Determination of Lobatolide H, a Flexible Sesquiterpene from Neurolaena lobata
Source: MDPI journal article supplement (doi:10.3390/ijms24065841), 2023-03-19
Supplement: s1 [file s1]

## Supporting Information

### Isolation and NMR Scaling Factors for the Structure Determination of Lobatolide H, a Flexible Sesquiterpene from *Neurolaena lobata*

Tibor Kovács,<sup>a,b</sup> Ildikó Lajter,<sup>c</sup> Norbert Kúsz,<sup>c</sup> Zsuzsanna Schelz,<sup>d</sup> Noémi Bózsity-Faragó,<sup>d</sup> Anikó Borbás,<sup>e</sup> István Zupkó,<sup>d</sup> Georg Krupitza,<sup>f</sup> Richard Frisch,<sup>g</sup> Judit Hohmann,<sup>c,h</sup> Andrea Vasas,<sup>c,h,\*</sup> Attila Mándi,<sup>a,\*</sup>

<sup>a</sup> Department of Organic Chemistry, University of Debrecen, P.O.B. 400, 4002 Debrecen, Hungary

<sup>b</sup> Doctoral School of Chemistry, University of Debrecen, Egyetem tér 1, 4032 Debrecen, Hungary

<sup>c</sup> Institute of Pharmacognosy, University of Szeged, 6720 Szeged, Hungary

<sup>d</sup> Institute of Pharmacodynamics and Biopharmacy, University of Szeged, Eötvös u. 6, H-6720 Szeged, Hungary

<sup>e</sup> Department of Pharmaceutical Chemistry, University of Debrecen, Egyetem tér 1, H-4032 Debrecen, Hungary

<sup>f</sup> Clinical Institute of Pathology, Medical University of Vienna, Waehringer Guertel 18-20, A-1090 Vienna, Austria

<sup>g</sup> Institute for Ethnobiology, Playa Diana, GT-170 San José/Petén, Guatemala

<sup>h</sup> ELKH-USZ Biologically Active Natural Products Research Group, University of Szeged, Eötvös u. 6, H-6720 Szeged, Hungary

### Table of Contents

|                                                                                                                   |      |
|-------------------------------------------------------------------------------------------------------------------|------|
| NMR spectra of <b>1</b>                                                                                           | S2   |
| Low-energy conformers of the computed diastereomers of <b>1-3</b>                                                 | S6   |
| Tested NMR combinations with available scaling factors found in the literature                                    | S11  |
| MAE and $\Delta\delta_{\max}$ values obtained for <b>1-3</b> with the literature combinations                     | S13  |
| MAE and $\Delta\delta_{\max}$ values obtained for <b>1</b> and <b>3</b> with the currently developed combinations | S24  |
| Level dependency of Boltzmann populations and conformer dependency of chemical shift data                         | S34  |
| Cartesian coordinates and energies of the low-energy conformers calculated at various levels for <b>1-3</b>       | S42  |
| References                                                                                                        | S409 |

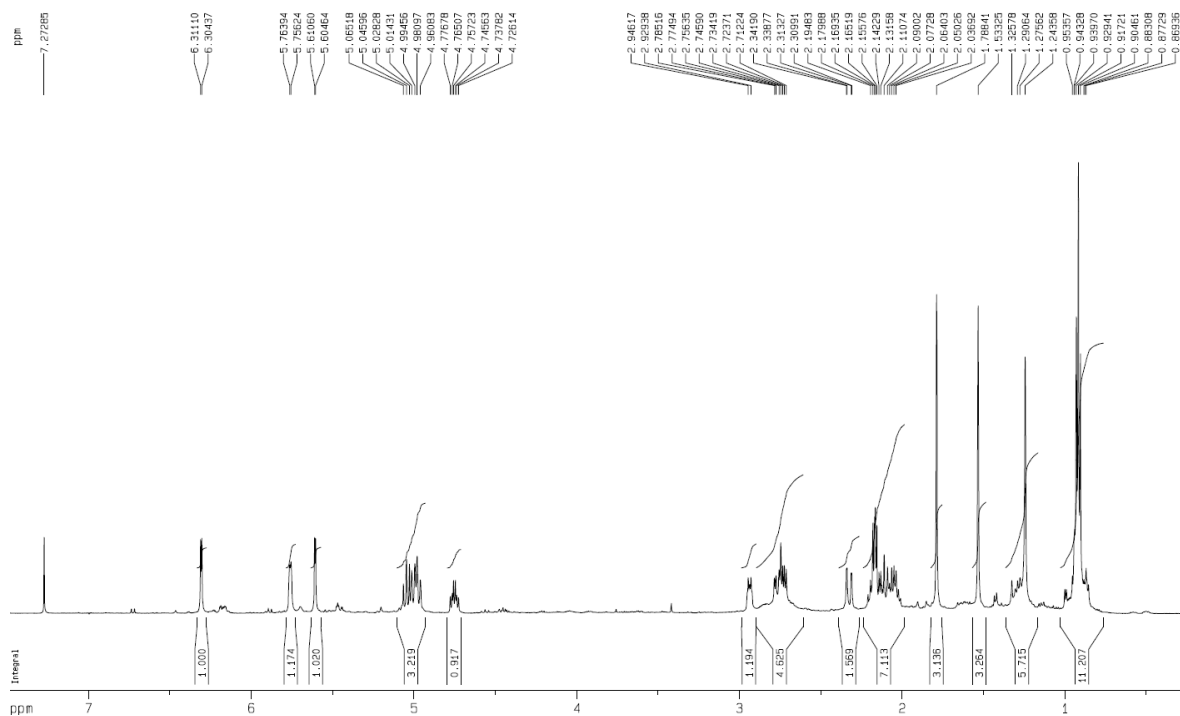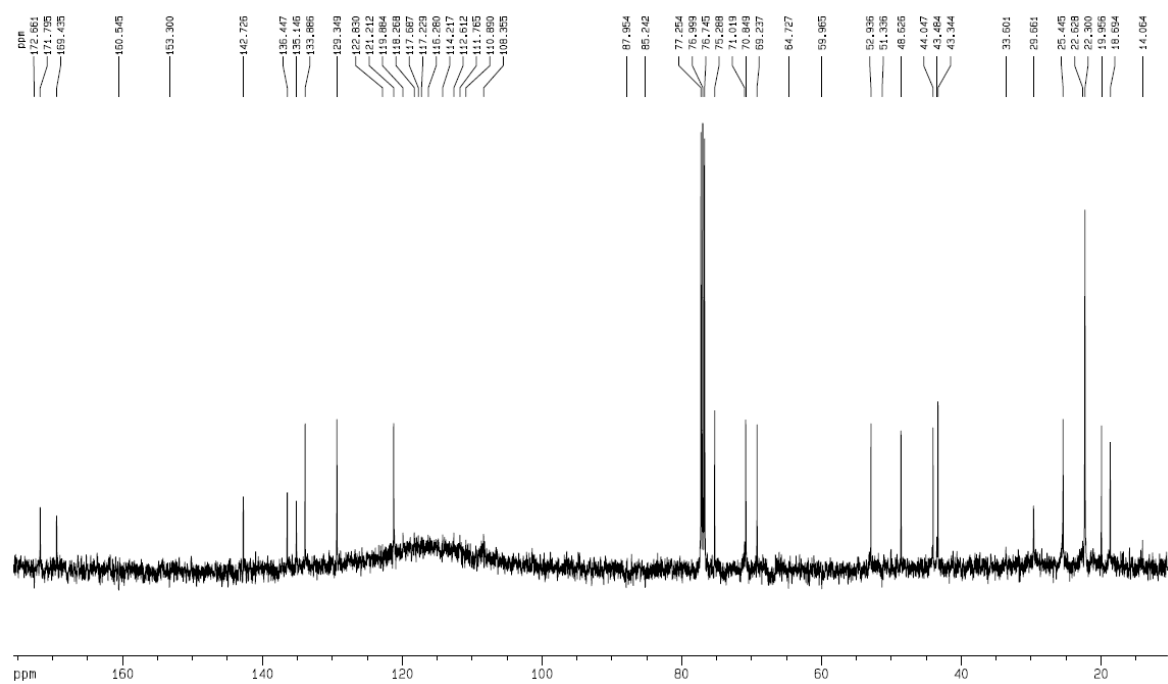

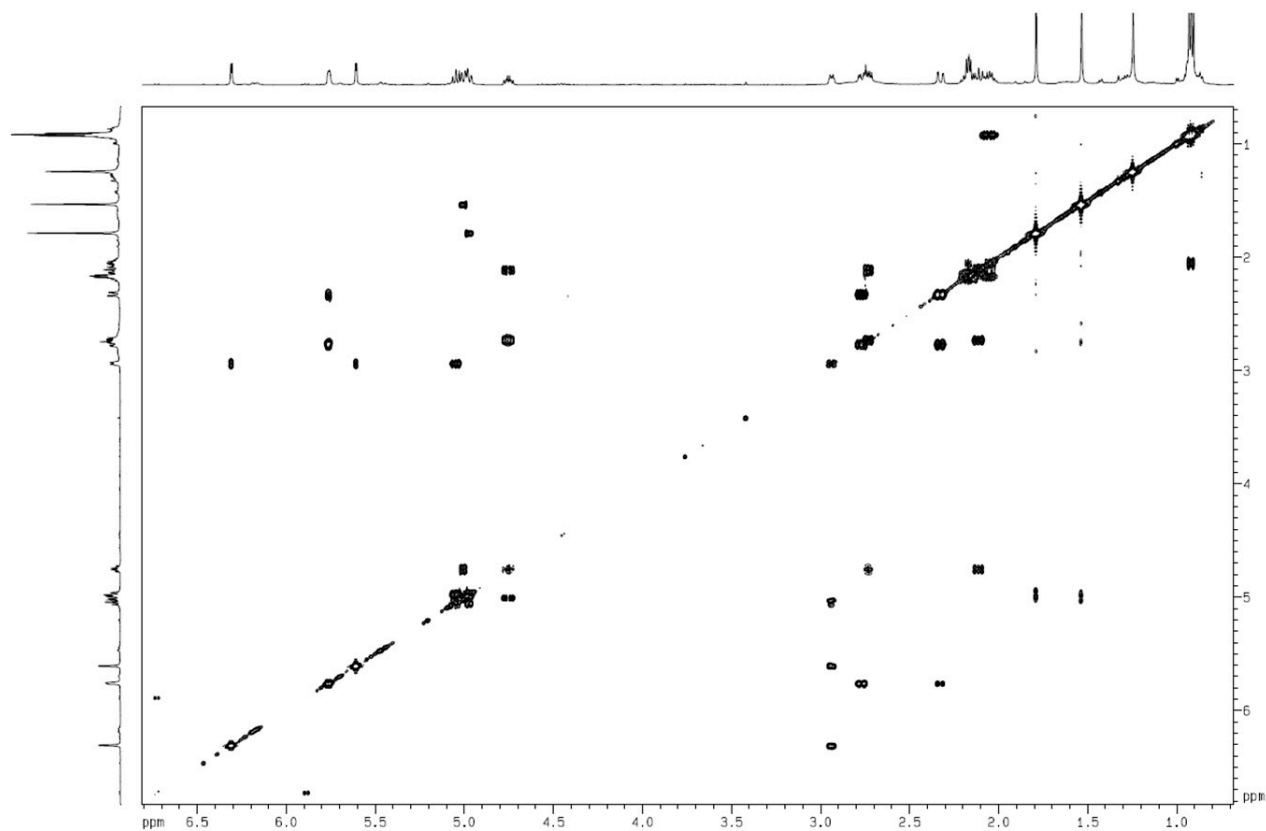

**Figure S3.**  $^1\text{H}$ - $^1\text{H}$  COSY spectrum of **1**

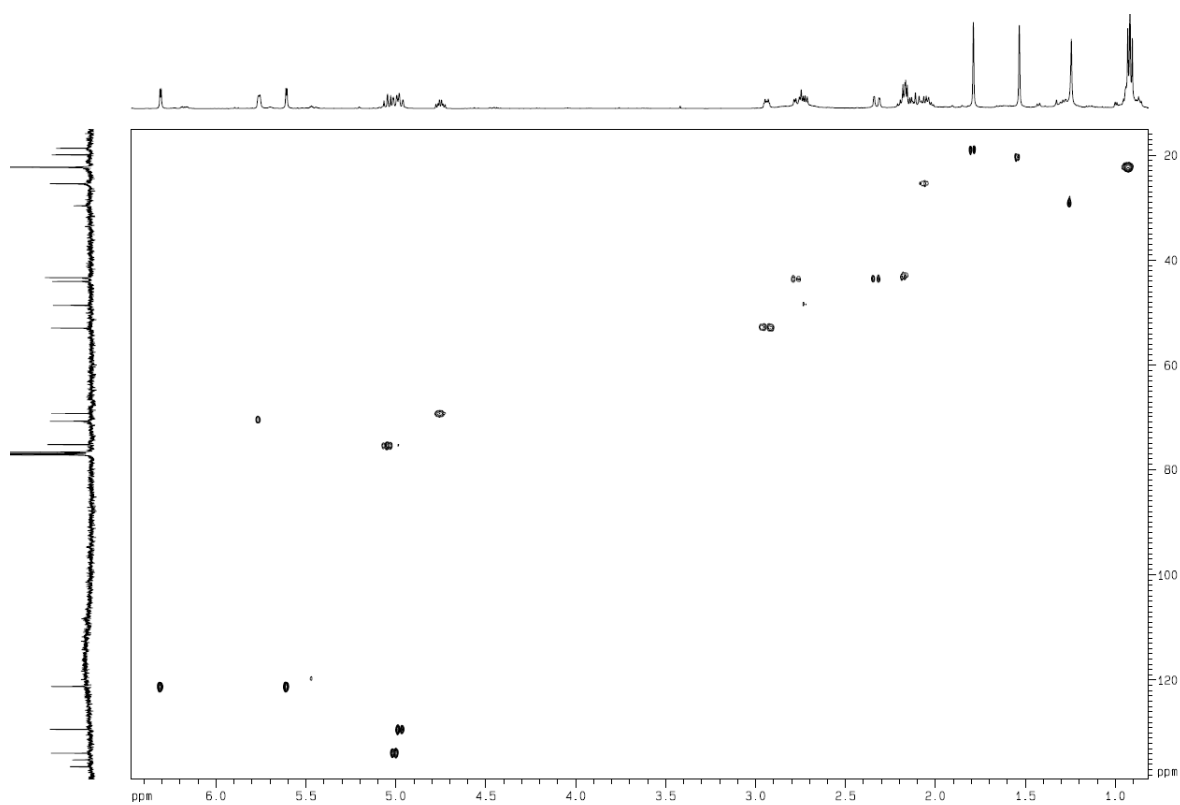

**Figure S4. HSQC spectrum of 1**

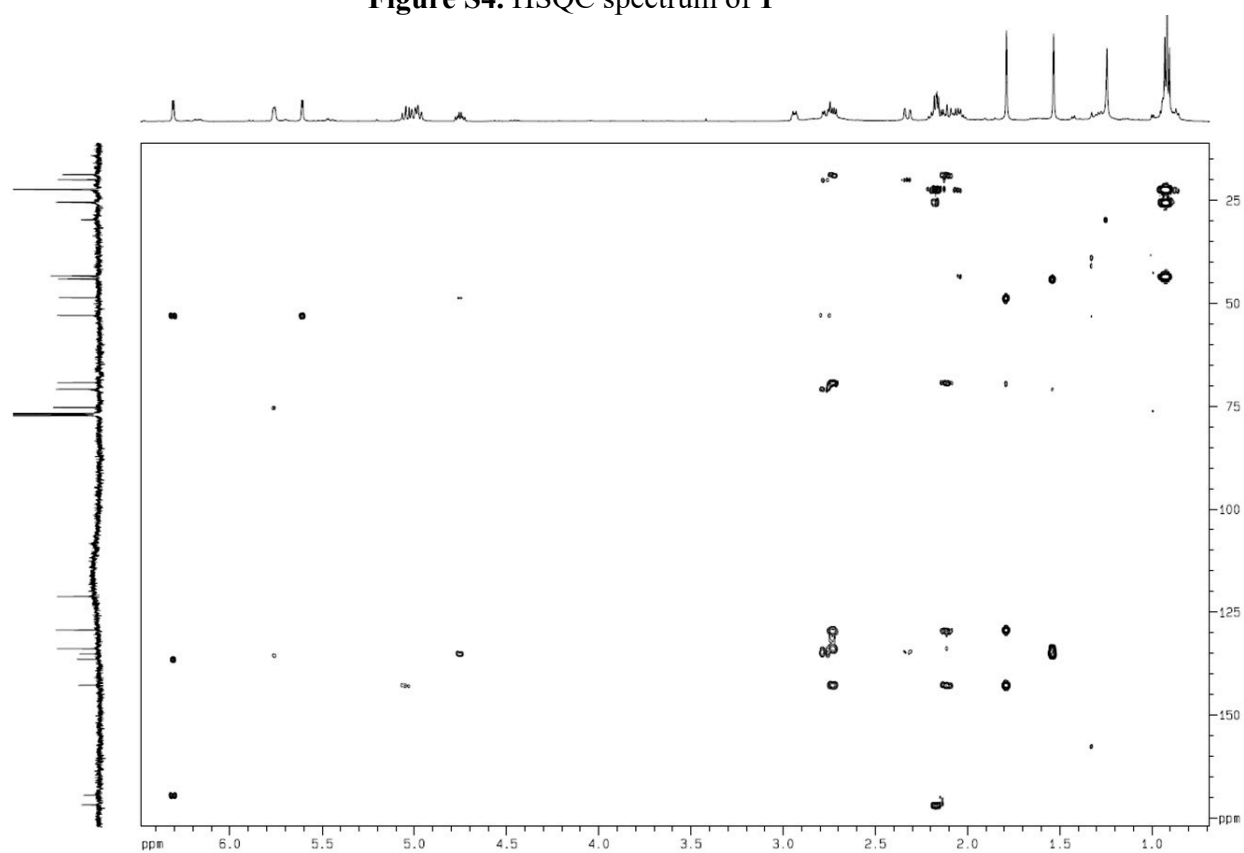



**Figure S5.** HMBC spectrum of **1**

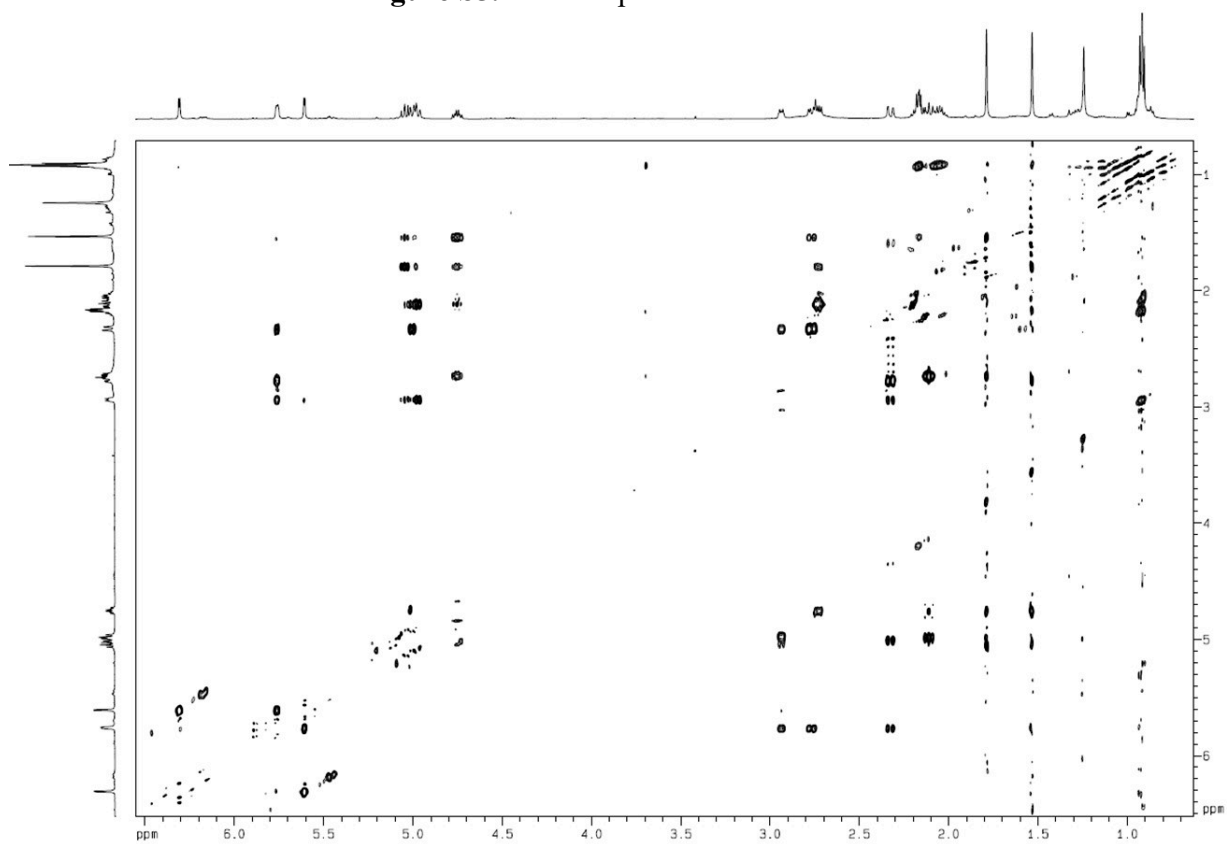

**Figure S6.** NOESY spectrum of **1**

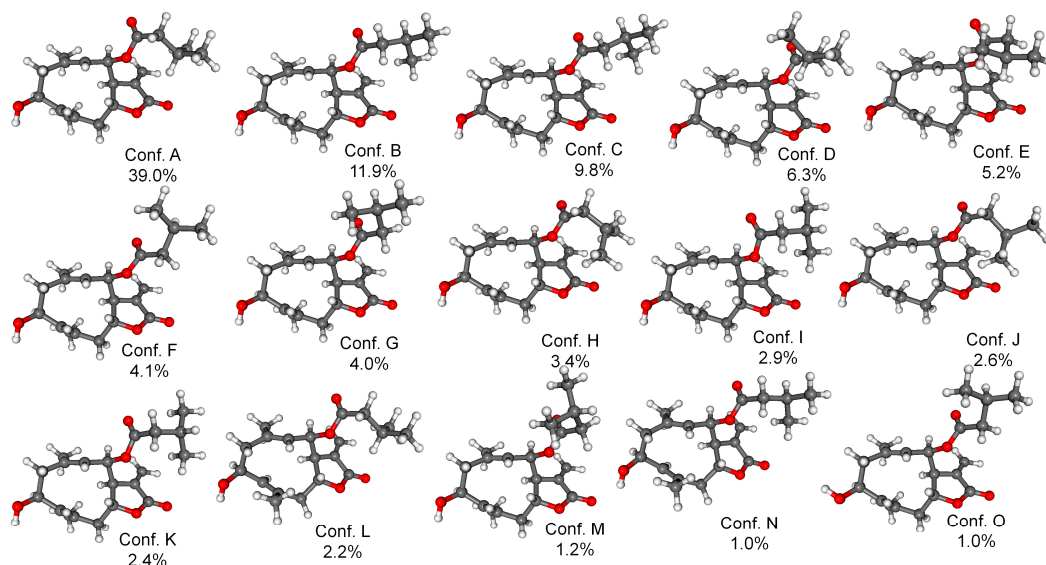

**Figure S7.** Structure and population of the low-energy ( $\geq 1\%$ )  $\omega$ B97XD/6-31+G(d,p) PCM/ $\text{CHCl}_3$  conformers of (2*S*,6*R*,7*S*,8*R*)-**1**.

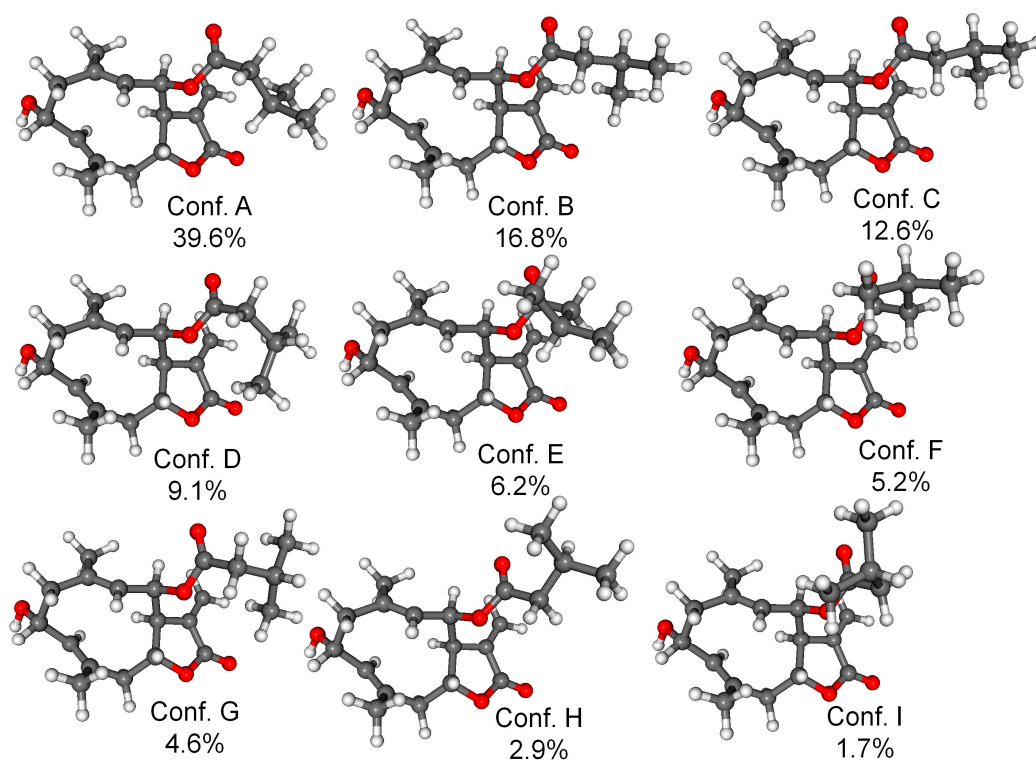

**Figure S8.** Structure and population of the low-energy ( $\geq 1\%$ )  $\omega$ B97XD/6-31+G(d,p) PCM/ $\text{CHCl}_3$  conformers of (2*R*,6*R*,7*S*,8*R*)-**1**.

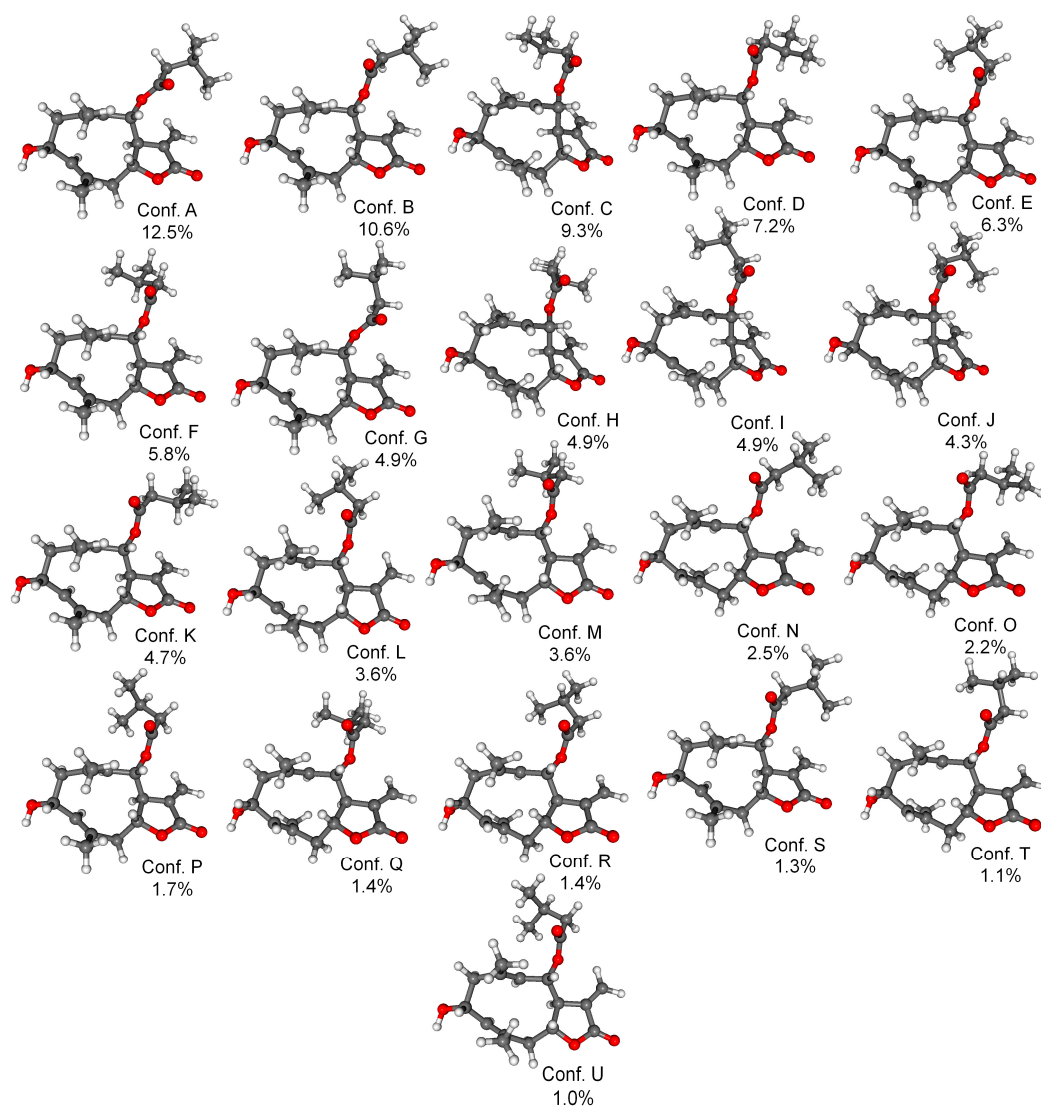

**Figure S9.** Structure and population of the low-energy ( $\geq 1\%$ )  $\omega$ B97XD/6-31+G(d,p) PCM/ $\text{CHCl}_3$  conformers of (2*R*,6*R*,7*S*,8*S*)-**1**.

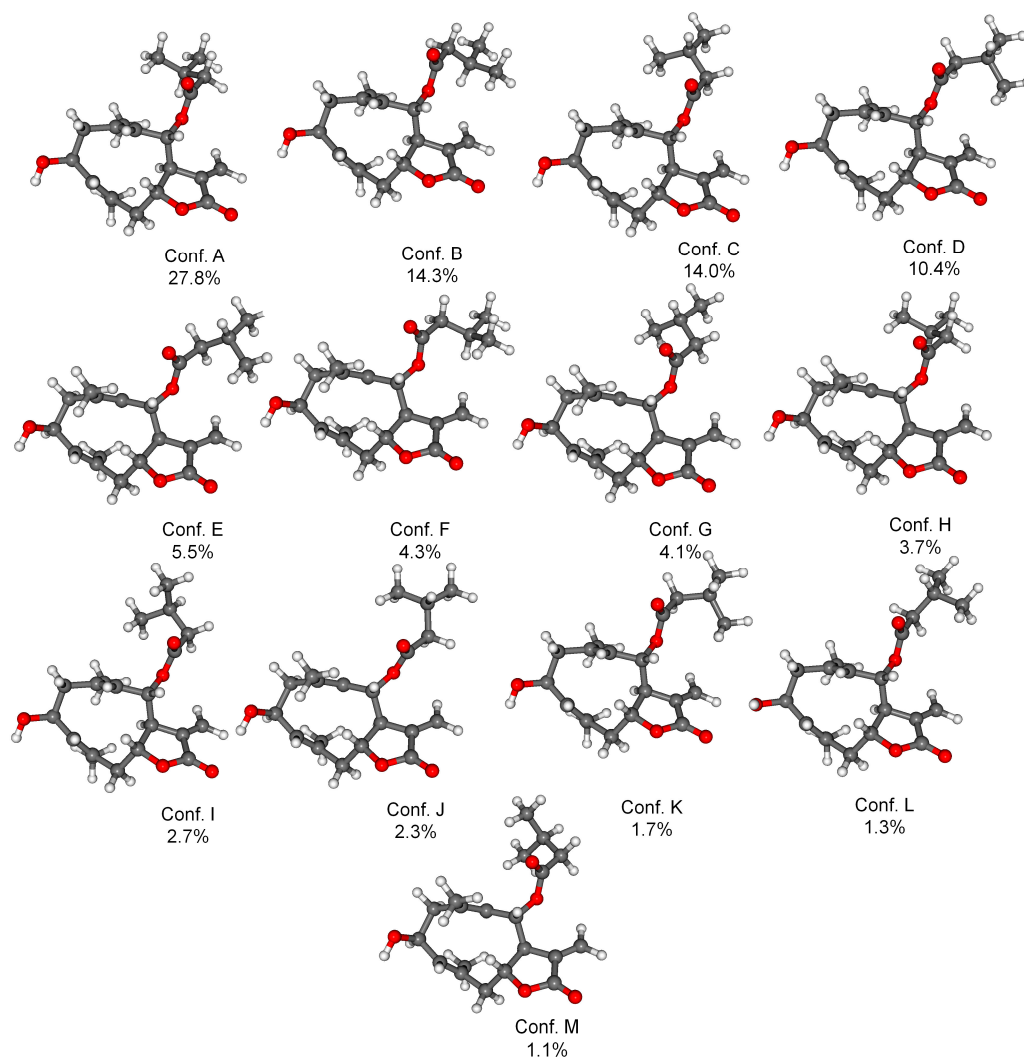

**Figure S10.** Structure and population of the low-energy ( $\geq 1\%$ )  $\omega$ B97XD/6-31+G(d,p) PCM/ $\text{CHCl}_3$  conformers of  $(2S,6R,7S,8S)$ -1.

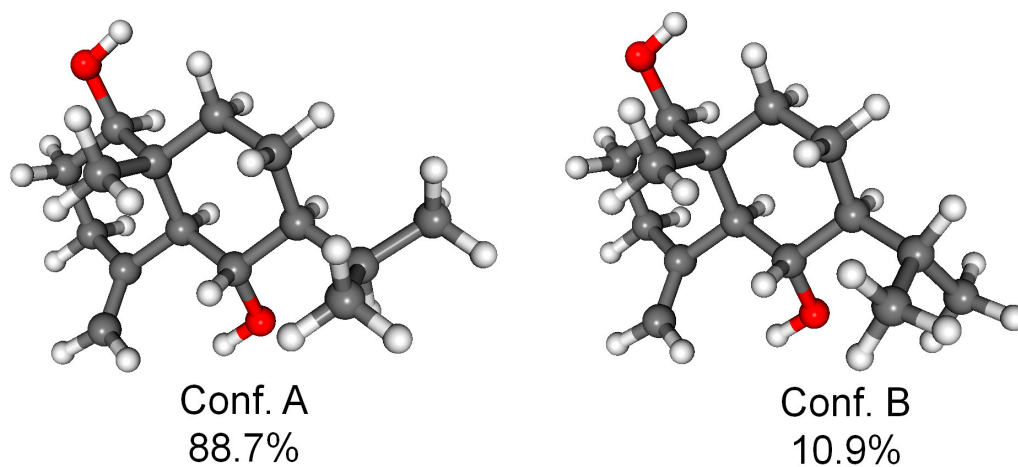

**Figure S11.** Structure and population of the low-energy ( $\geq 1\%$ )  $\omega$ B97XD/6-31+G(d,p) PCM/ $\text{CHCl}_3$  conformers of (1*R*,5*S*,6*S*,7*S*,10*R*)-**2**.

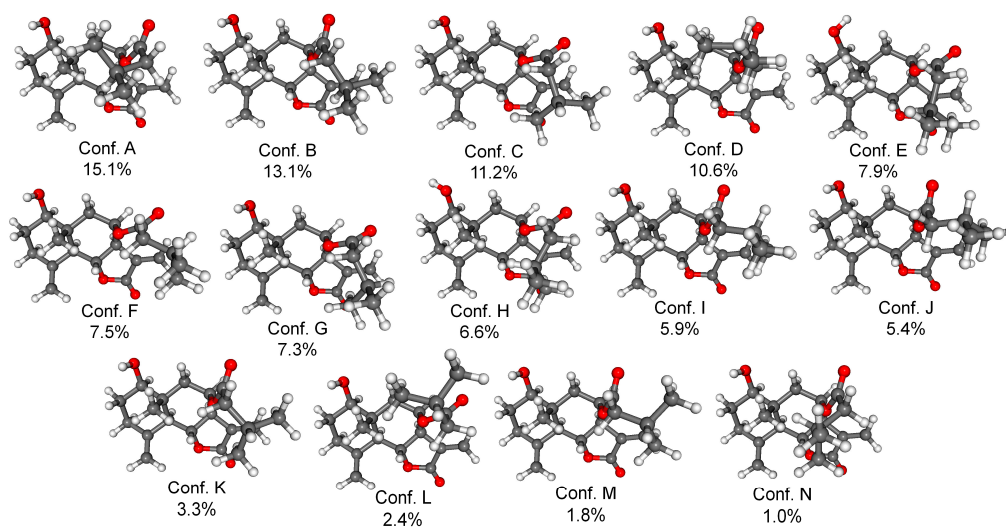

**Figure S12.** Structure and population of the low-energy ( $\geq 1\%$ )  $\omega$ B97X/6-31+G(d,p) PCM/ $\text{CHCl}_3$  conformers of (1*R*,5*S*,6*R*,7*R*,8*R*,10*R*)-**3**.

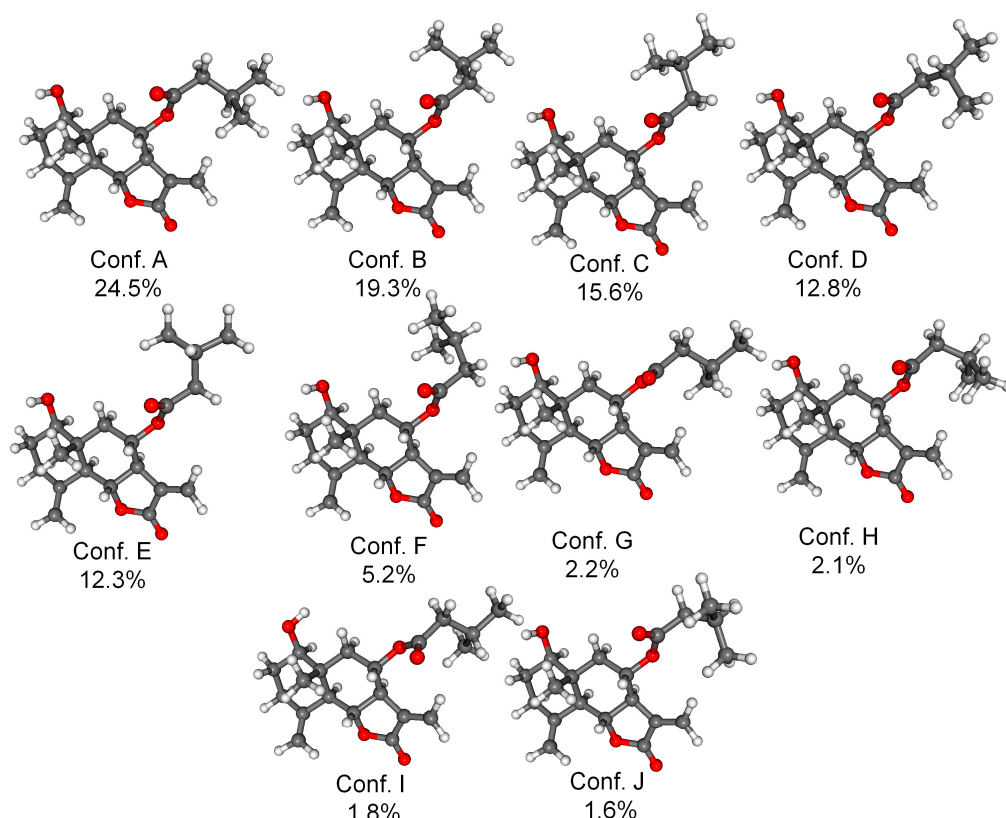

**Figure S13.** Structure and population of the low-energy ( $\geq 1\%$ )  $\omega$ B97X/6-31+G(d,p) PCM/ $\text{CHCl}_3$  conformers of (1*R*,5*S*,6*R*,7*R*,8*S*,10*R*)-**3**.

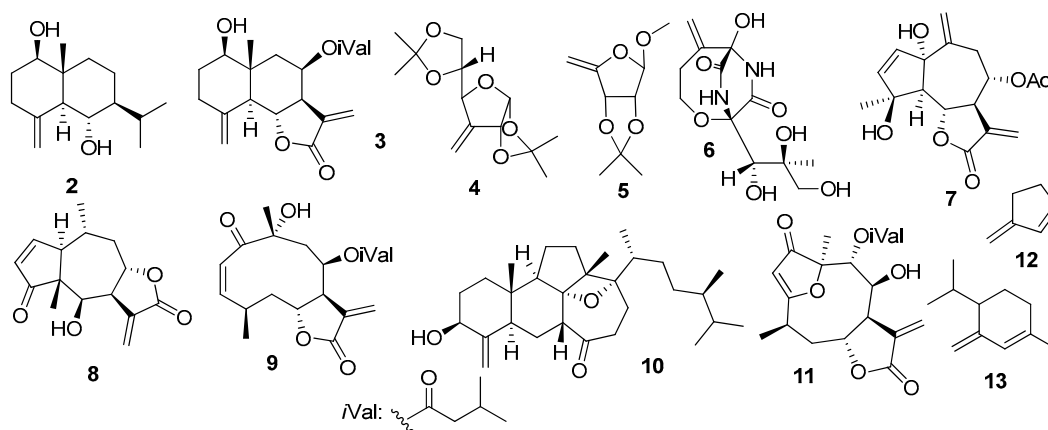

**Figure S14.** The experimental  $^{13}\text{C}$  and  $^1\text{H}$  NMR data of the NMR test compounds and reference compounds [volenol (**2**), 8 $\beta$ -isovaleroyloxyreynosin (**3**), 3-deoxy-1,2;5,6-di-*O*-isopropylidene-3-*C*-methylene- $\alpha$ -*D*-ribo-hexofuranose (**4**), methyl 5-deoxy-2,3-*O*-isopropylidene- $\beta$ -*D*-erythro-pent-4-enofuranoside (**5**), bicyclomycin (**6**), 1 $\alpha$ ,4 $\beta$ -dihydroxy-8 $\alpha$ -acetoxy-guaia-2,10(14),11(13)-triene-6,12-olide (**7**), mexicanin I (**8**), neurolenin A (**9**), swinhoeisterol F (**10**), lobatolide A (**11**), 3-methylenecyclopent-1-ene (**12**), 4-isopropyl-1-methyl-3-methylenecyclohex-1-ene (**13**)] can be found in refs. 1-10.

**Table S1.** Tested NMR combinations with available scaling factors found in the literature.<sup>12-16</sup>

| No. | DFT optimizat on level                     | NMR level                                       | Intercept | Slope   |
|-----|--------------------------------------------|-------------------------------------------------|-----------|---------|
| 1   | B3LYP/6-31G(d)                             | B3LYP/6-31G(d)                                  | 187.4743  | -0.9269 |
| 2   | B3LYP/6-31G(d)                             | B3LYP/6-31+G(d,p)                               | 189.4397  | -0.9468 |
| 3   | B3LYP/6-31+G(d,p)                          | B3LYP/6-311+G(2d,p)                             | 180.7713  | -1.0311 |
| 4   | B3LYP/6-31+G(d,p)                          | B3LYP/aug-cc-pVDZ                               | 181.3782  | -1.0228 |
| 5   | B3LYP/6-31+G(d,p)                          | mPW1PW91/6-311+G(2d,p)                          | 185.4855  | -1.0306 |
| 6   | B3LYP/6-31+G(d,p)                          | PBE0/6-311+G(2d,p)                              | 186.2696  | -1.0305 |
| 7   | B3LYP/6-31+G(d,p)                          | WC04/aug-cc-pVDZ                                | 196.9100  | -0.9563 |
| 8   | B3LYP/6-311+G(2d,p)                        | B3LYP/6-311+G(2d,p)                             | 181.3782  | -1.0228 |
| 9   | B3LYP/6-311+G(2d,p)                        | mPW1PW91/6-311+G(2d,p)                          | 186.0684  | -1.0226 |
| 10  | B3LYP/6-311+G(2d,p)                        | PBE0/6-311+G(2d,p)                              | 186.8488  | -1.0226 |
| 11  | M06-2X/6-31G(d)                            | M06-2X/6-31G(d)                                 | 195.8694  | -1.0591 |
| 12  | M06-2X/6-31G(d)                            | M06-2X/6-31+G(d,p)                              | 197.1285  | -1.0741 |
| 13  | M06-2X/6-31G(d)                            | M06-L/6-31G(d)                                  | 185.5136  | -0.8512 |
| 14  | M06-2X/6-31G(d)                            | M06-L/6-31+G(d,p)                               | 187.7662  | -0.8665 |
| 15  | M06-2X/6-31G(d)                            | mPW1PW91/6-31G(d)                               | 192.1504  | -0.9349 |
| 16  | M06-2X/6-31G(d)                            | mPW1PW91/6-31+G(d,p)                            | 193.8769  | -0.9511 |
| 17  | M06-2X/6-31+G(d,p)                         | M06-2X/6-311+G(2d,p)                            | 180.5121  | -0.9295 |
| 18  | M06-2X/6-31+G(d,p)                         | M06-L/6-311+G(2d,p)                             | 181.0501  | -0.9245 |
| 19  | B3LYP/6-31G(d)                             | B3LYP/6-31G(d) SMD/CHCl <sub>3</sub>            | 188.4418  | -0.9449 |
| 20  | B3LYP/6-31G(d)                             | B3LYP/6-31+G(d,p) SMD/CHCl <sub>3</sub>         | 190.4279  | -0.9679 |
| 21  | B3LYP/6-31+G(d,p)                          | B3LYP/6-311+G(2d,p) SMD/CHCl <sub>3</sub>       | 181.7815  | -1.0537 |
| 22  | B3LYP/6-31+G(d,p)                          | B3LYP/aug-cc-pVDZ SMD/CHCl <sub>3</sub>         | 190.9490  | -1.0048 |
| 23  | B3LYP/6-31+G(d,p)                          | mPW1PW91/6-311+G(2d,p)<br>SMD/CHCl <sub>3</sub> | 186.5242  | -1.0533 |
| 24  | B3LYP/6-31+G(d,p)                          | PBE0/6-311+G(2d,p) SMD/CHCl <sub>3</sub>        | 187.3123  | -1.0533 |
| 25  | B3LYP/6-31+G(d,p)                          | VSXC/aug-cc-pVDZ SMD/CHCl <sub>3</sub>          | 184.8018  | -0.9589 |
| 26  | B3LYP/6-31+G(d,p)                          | WC04/aug-cc-pVDZ SMD/CHCl <sub>3</sub>          | 197.7614  | -0.9760 |
| 27  | B3LYP/6-311+G(2d,p)                        | B3LYP/6-311+G(2d,p) SMD/CHCl <sub>3</sub>       | 182.3835  | -1.0451 |
| 28  | B3LYP/6-311+G(2d,p)                        | mPW1PW91/6-311+G(2d,p)<br>SMD/CHCl <sub>3</sub> | 187.1018  | -1.0449 |
| 29  | B3LYP/6-311+G(2d,p)                        | PBE0/6-311+G(2d,p) SMD/CHCl <sub>3</sub>        | 187.8859  | -1.0450 |
| 30  | M06-2X/6-31G(d)                            | M06-2X/6-31G(d) SMD/CHCl <sub>3</sub>           | 196.9784  | -1.0801 |
| 31  | M06-2X/6-31G(d)                            | M06-2X/6-31+G(d,p) SMD/CHCl <sub>3</sub>        | 198.2814  | -1.0982 |
| 32  | M06-2X/6-31G(d)                            | M06-L/6-31G(d) SMD/CHCl <sub>3</sub>            | 186.5207  | -0.8684 |
| 33  | M06-2X/6-31G(d)                            | M06-L/6-31+G(d,p) SMD/CHCl <sub>3</sub>         | 188.7538  | -0.8856 |
| 34  | M06-2X/6-31G(d)                            | mPW1PW91/6-31G(d) SMD/CHCl <sub>3</sub>         | 193.2179  | -0.9537 |
| 35  | M06-2X/6-31G(d)                            | mPW1PW91/6-31+G(d,p)<br>SMD/CHCl <sub>3</sub>   | 194.9643  | -0.9726 |
| 36  | M06-2X/6-31+G(d,p)                         | M06-2X/6-311+G(2d,p) SMD/CHCl <sub>3</sub>      | 189.5548  | -1.1746 |
| 37  | M06-2X/6-31+G(d,p)                         | M06-L/6-311+G(2d,p) SMD/CHCl <sub>3</sub>       | 181.4397  | -0.9491 |
| 38  | M06-2X/6-31+G(d,p)                         | mPW1PW91/6-311+G(2d,p)<br>SMD/CHCl <sub>3</sub> | 186.7246  | -1.0446 |
| 39  | M06-2X/6-311+G(2d,p)                       | M06-2X/6-311+G(2d,p) SMD/CHCl <sub>3</sub>      | 189.9794  | -1.1650 |
| 40  | M06-2X/6-311+G(2d,p)                       | M06-L/6-311+G(2d,p) SMD/CHCl <sub>3</sub>       | 181.9711  | -0.9439 |
| 41  | M06-2X/6-311+G(2d,p)                       | mPW1PW91/6-311+G(2d,p)<br>SMD/CHCl <sub>3</sub> | 187.2065  | -1.0379 |
| 42  | B3LYP/6-31+G(d,p)<br>SMD/CHCl <sub>3</sub> | mPW1PW91/6-311+G(2d,p)<br>SMD/CHCl <sub>3</sub> | 186.2627  | -1.0512 |
| 43  | B3LYP/6-31+G(d,p)                          | B3LYP/6-31G(d)                                  | 186.79    | -0.93   |

|    |                                                 |                                                 |          |         |
|----|-------------------------------------------------|-------------------------------------------------|----------|---------|
| 44 | B3LYP/6-31+G(d,p)                               | B3LYP/6-31G(d,p)                                | 188.57   | -0.94   |
| 45 | B3LYP/6-31+G(d,p)                               | B3LYP/6-31+G(d,p)                               | 189.00   | -0.95   |
| 46 | B3LYP/6-31+G(d,p)                               | B3LYP/6-31++G(d,p)                              | 188.63   | -0.95   |
| 47 | B3LYP/6-31+G(d,p)                               | B3LYP/6-311G(d)                                 | 180.71   | -1.02   |
| 48 | B3LYP/6-31+G(d,p)                               | B3LYP/6-311G(d,p)                               | 180.51   | -1.02   |
| 49 | B3LYP/6-31+G(d,p)                               | B3LYP/6-311+G(d,p)                              | 180.62   | -1.02   |
| 50 | B3LYP/6-31+G(d,p)                               | B3LYP/6-311+G(2d,p)                             | 180.09   | -1.03   |
| 51 | B3LYP/6-31+G(d,p)                               | B3LYP/6-311++G(d,p)                             | 180.62   | -1.03   |
| 52 | B3LYP/6-31+G(d,p)                               | B3LYP/cc-pVDZ                                   | 189.61   | -0.97   |
| 53 | B3LYP/6-31+G(d,p)                               | B3LYP/aug-cc-pVDZ                               | 189.19   | -0.99   |
| 54 | B3LYP/6-31+G(d,p)                               | B3LYP/cc-pVTZ                                   | 180.43   | -1.03   |
| 55 | B3LYP/6-31+G(d,p)                               | BMK/6-31G(d)                                    | 194.56   | -1.04   |
| 56 | B3LYP/6-31+G(d,p)                               | BMK/6-311G(d)                                   | 187.69   | -1.25   |
| 57 | B3LYP/6-31+G(d,p)                               | M06/6-31G(d)                                    | 183.90   | -0.96   |
| 58 | B3LYP/6-31+G(d,p)                               | M06-L/6-31G(d)                                  | 184.36   | -0.86   |
| 59 | B3LYP/6-31+G(d,p)                               | OPBE/6-31G(d)                                   | 189.55   | -0.90   |
| 60 | B3LYP/6-31+G(d,p)                               | VSXC/6-31G(d)                                   | 186.87   | -0.86   |
| 61 | B3LYP/6-31+G(d,p)                               | WC04/6-31G(d)                                   | 192.49   | -0.90   |
| 62 | B3LYP/6-31+G(d,p)                               | B3LYP/6-31G(d)                                  | 181.4540 | -1.0074 |
| 63 | B3LYP/6-31+G(d,p)                               | B3LYP/6-31G(d) PCM/CHCl <sub>3</sub>            | 182.1337 | -1.0222 |
| 64 | B3LYP/6-31+G(d,p)                               | B3LYP/6-311+G(2d,p)                             | 181.0114 | -1.0262 |
| 65 | B3LYP/6-31+G(d,p)                               | B3LYP/6-311+G(2d,p) PCM/CHCl <sub>3</sub>       | 181.7173 | -1.0427 |
| 66 | B3LYP/6-31+G(d,p)                               | B3LYP/cc-pVDZ                                   | 190.7467 | -0.9618 |
| 67 | B3LYP/6-31+G(d,p)                               | B3LYP/cc-pVDZ PCM/CHCl <sub>3</sub>             | 191.3459 | -0.9742 |
| 68 | B3LYP/6-31+G(d,p)                               | B3LYP/aug-cc-pVDZ                               | 190.3004 | -0.9825 |
| 69 | B3LYP/6-31+G(d,p)                               | B3LYP/aug-cc-pVDZ PCM/CHCl <sub>3</sub>         | 190.9642 | -0.9974 |
| 70 | B3LYP/6-31+G(d,p)                               | BMK/6-31G(d)                                    | 195.0388 | -1.0302 |
| 71 | B3LYP/6-31+G(d,p)                               | BMK/6-31G(d) PCM/CHCl <sub>3</sub>              | 195.7931 | -1.0453 |
| 72 | B3LYP/6-31+G(d,p)                               | BMK/6-311G(d)                                   | 187.9681 | -1.1115 |
| 73 | B3LYP/6-31+G(d,p)                               | BMK/6-311G(d) PCM/CHCl <sub>3</sub>             | 188.7195 | -1.1285 |
| 74 | B3LYP/6-31+G(d,p)                               | mPW1PW91/6-311+G(2d,p)                          | 185.6419 | -1.0255 |
| 75 | B3LYP/6-31+G(d,p)                               | mPW1PW91/6-311+G(2d,p)<br>PCM/CHCl <sub>3</sub> | 186.3567 | -1.0420 |
| 76 | B3LYP/6-31+G(d,p)                               | PBE0/6-311+G(2d,p)                              | 186.4772 | -1.0258 |
| 77 | B3LYP/6-31+G(d,p)                               | PBE0/6-311+G(2d,p) PCM/CHCl <sub>3</sub>        | 187.1937 | -1.0423 |
| 78 | B3LYP/6-31+G(d,p)                               | WC04/6-31G(d)                                   | 193.0729 | -0.9007 |
| 79 | B3LYP/6-31+G(d,p)                               | WC04/6-31G(d) PCM/CHCl <sub>3</sub>             | 193.6390 | -0.9124 |
| 80 | mPW1PW91/6-311+G(2d,p)<br>SMD/CHCl <sub>3</sub> | mPW1PW91/6-311+G(2d,p)<br>SMD/CHCl <sub>3</sub> | 187.9864 | -1.0358 |



**Table S2.** Investigated combinations of computational levels with their MAE and  $\Delta\delta_{\max}$  values obtained for (1R,5S,6S,7S,10R)-2.

| No. | DFT optimizatoin level                  | NMR level                                       | MAE  | $\Delta\delta_{\max}$ |
|-----|-----------------------------------------|-------------------------------------------------|------|-----------------------|
| 1   | B3LYP/6-31G(d)                          | B3LYP/6-31G(d)                                  | 2.09 | 5.88                  |
| 2   | B3LYP/6-31G(d)                          | B3LYP/6-31+G(d,p)                               | 3.18 | 8.33                  |
| 3   | B3LYP/6-31+G(d,p)                       | B3LYP/6-311+G(2d,p)                             | 2.57 | 9.06                  |
| 4   | B3LYP/6-31+G(d,p)                       | B3LYP/aug-cc-pVDZ                               | 3.41 | 9.51                  |
| 5   | B3LYP/6-31+G(d,p)                       | mPW1PW91/6-311+G(2d,p)                          | 1.76 | 7.61                  |
| 6   | B3LYP/6-31+G(d,p)                       | PBE0/6-311+G(2d,p)                              | 1.78 | 7.76                  |
| 7   | B3LYP/6-31+G(d,p)                       | WC04/aug-cc-pVDZ                                | 3.07 | 10.63                 |
| 8   | B3LYP/6-311+G(2d,p)                     | B3LYP/6-311+G(2d,p)                             | 2.61 | 9.21                  |
| 9   | B3LYP/6-311+G(2d,p)                     | mPW1PW91/6-311+G(2d,p)                          | 1.76 | 7.76                  |
| 10  | B3LYP/6-311+G(2d,p)                     | PBE0/6-311+G(2d,p)                              | 1.80 | 7.90                  |
| 11  | M06-2X/6-31G(d)                         | M06-2X/6-31G(d)                                 | 2.26 | 6.48                  |
| 12  | M06-2X/6-31G(d)                         | M06-2X/6-31+G(d,p)                              | 2.20 | 8.56                  |
| 13  | M06-2X/6-31G(d)                         | M06-L/6-31G(d)                                  | 2.48 | 6.43                  |
| 14  | M06-2X/6-31G(d)                         | M06-L/6-31+G(d,p)                               | 3.93 | 6.33                  |
| 15  | M06-2X/6-31G(d)                         | mPW1PW91/6-31G(d)                               | 1.35 | 4.78                  |
| 16  | M06-2X/6-31G(d)                         | mPW1PW91/6-31+G(d,p)                            | 1.84 | 7.30                  |
| 17  | M06-2X/6-31+G(d,p)                      | M06-2X/6-311+G(2d,p)                            | 2.29 | 9.55                  |
| 18  | M06-2X/6-31+G(d,p)                      | M06-L/6-311+G(2d,p)                             | 1.99 | 8.20                  |
| 19  | B3LYP/6-31G(d)                          | B3LYP/6-31G(d) SMD/CHCl <sub>3</sub>            | 2.03 | 5.28                  |
| 20  | B3LYP/6-31G(d)                          | B3LYP/6-31+G(d,p) SMD/CHCl <sub>3</sub>         | 3.14 | 7.51                  |
| 21  | B3LYP/6-31+G(d,p)                       | B3LYP/6-311+G(2d,p) SMD/CHCl <sub>3</sub>       | 2.52 | 8.09                  |
| 22  | B3LYP/6-31+G(d,p)                       | B3LYP/aug-cc-pVDZ SMD/CHCl <sub>3</sub>         | 3.34 | 8.61                  |
| 23  | B3LYP/6-31+G(d,p)                       | mPW1PW91/6-311+G(2d,p)<br>SMD/CHCl <sub>3</sub> | 1.88 | 6.60                  |
| 24  | B3LYP/6-31+G(d,p)                       | PBE0/6-311+G(2d,p) SMD/CHCl <sub>3</sub>        | 1.89 | 6.74                  |
| 25  | B3LYP/6-31+G(d,p)                       | VSXC/aug-cc-pVDZ SMD/CHCl <sub>3</sub>          | 4.29 | 16.32                 |
| 26  | B3LYP/6-31+G(d,p)                       | WC04/aug-cc-pVDZ SMD/CHCl <sub>3</sub>          | 3.41 | 10.36                 |
| 27  | B3LYP/6-311+G(2d,p)                     | B3LYP/6-311+G(2d,p) SMD/CHCl <sub>3</sub>       | 2.54 | 8.22                  |
| 28  | B3LYP/6-311+G(2d,p)                     | mPW1PW91/6-311+G(2d,p)<br>SMD/CHCl <sub>3</sub> | 1.82 | 6.73                  |
| 29  | B3LYP/6-311+G(2d,p)                     | PBE0/6-311+G(2d,p) SMD/CHCl <sub>3</sub>        | 1.82 | 6.87                  |
| 30  | M06-2X/6-31G(d)                         | M06-2X/6-31G(d) SMD/CHCl <sub>3</sub>           | 2.26 | 5.25                  |
| 31  | M06-2X/6-31G(d)                         | M06-2X/6-31+G(d,p) SMD/CHCl <sub>3</sub>        | 2.08 | 7.56                  |
| 32  | M06-2X/6-31G(d)                         | M06-L/6-31G(d) SMD/CHCl <sub>3</sub>            | 2.52 | 6.02                  |
| 33  | M06-2X/6-31G(d)                         | M06-L/6-31+G(d,p) SMD/CHCl <sub>3</sub>         | 3.31 | 8.26                  |
| 34  | M06-2X/6-31G(d)                         | mPW1PW91/6-31G(d) SMD/CHCl <sub>3</sub>         | 1.30 | 4.17                  |
| 35  | M06-2X/6-31G(d)                         | mPW1PW91/6-31+G(d,p)<br>SMD/CHCl <sub>3</sub>   | 1.84 | 6.49                  |
| 36  | M06-2X/6-31+G(d,p)                      | M06-2X/6-311+G(2d,p) SMD/CHCl <sub>3</sub>      | 3.36 | 12.17                 |
| 37  | M06-2X/6-31+G(d,p)                      | M06-L/6-311+G(2d,p) SMD/CHCl <sub>3</sub>       | 2.48 | 7.99                  |
| 38  | M06-2X/6-31+G(d,p)                      | mPW1PW91/6-311+G(2d,p)<br>SMD/CHCl <sub>3</sub> | 1.87 | 7.33                  |
| 39  | M06-2X/6-311+G(2d,p)                    | M06-2X/6-311+G(2d,p) SMD/CHCl <sub>3</sub>      | 2.14 | 8.54                  |
| 40  | M06-2X/6-311+G(2d,p)                    | M06-L/6-311+G(2d,p) SMD/CHCl <sub>3</sub>       | 2.11 | 7.52                  |
| 41  | M06-2X/6-311+G(2d,p)                    | mPW1PW91/6-311+G(2d,p)<br>SMD/CHCl <sub>3</sub> | 1.82 | 7.42                  |
| 42  | B3LYP/6-31+G(d,p) SMD/CHCl <sub>3</sub> | mPW1PW91/6-311+G(2d,p)<br>SMD/CHCl <sub>3</sub> | 1.75 | 6.69                  |
| 43  | B3LYP/6-31+G(d,p)                       | B3LYP/6-31G(d)                                  | 1.48 | 5.35                  |

|    |                                                 |                                                 |      |       |
|----|-------------------------------------------------|-------------------------------------------------|------|-------|
| 44 | B3LYP/6-31+G(d,p)                               | B3LYP/6-31G(d,p)                                | 1.95 | 6.06  |
| 45 | B3LYP/6-31+G(d,p)                               | B3LYP/6-31+G(d,p)                               | 2.87 | 8.06  |
| 46 | B3LYP/6-31+G(d,p)                               | B3LYP/6-31++G(d,p)                              | 2.65 | 7.69  |
| 47 | B3LYP/6-31+G(d,p)                               | B3LYP/6-311G(d)                                 | 2.24 | 8.48  |
| 48 | B3LYP/6-31+G(d,p)                               | B3LYP/6-311G(d,p)                               | 2.26 | 8.82  |
| 49 | B3LYP/6-31+G(d,p)                               | B3LYP/6-311+G(d,p)                              | 2.44 | 9.90  |
| 50 | B3LYP/6-31+G(d,p)                               | B3LYP/6-311+G(2d,p)                             | 2.35 | 8.57  |
| 51 | B3LYP/6-31+G(d,p)                               | B3LYP/6-311++G(d,p)                             | 2.26 | 8.53  |
| 52 | B3LYP/6-31+G(d,p)                               | B3LYP/cc-pVDZ                                   | 2.44 | 6.92  |
| 53 | B3LYP/6-31+G(d,p)                               | B3LYP/aug-cc-pVDZ                               | 2.83 | 7.76  |
| 54 | B3LYP/6-31+G(d,p)                               | B3LYP/cc-pVTZ                                   | 2.23 | 7.80  |
| 55 | B3LYP/6-31+G(d,p)                               | BMK/6-31G(d)                                    | 1.71 | 7.60  |
| 56 | B3LYP/6-31+G(d,p)                               | BMK/6-311G(d)                                   | 4.49 | 10.52 |
| 57 | B3LYP/6-31+G(d,p)                               | M06/6-31G(d)                                    | 1.32 | 3.31  |
| 58 | B3LYP/6-31+G(d,p)                               | M06-L/6-31G(d)                                  | 1.98 | 5.09  |
| 59 | B3LYP/6-31+G(d,p)                               | OPBE/6-31G(d)                                   | 1.51 | 2.99  |
| 60 | B3LYP/6-31+G(d,p)                               | VSXC/6-31G(d)                                   | 4.85 | 10.34 |
| 61 | B3LYP/6-31+G(d,p)                               | WC04/6-31G(d)                                   | 2.95 | 7.97  |
| 62 | B3LYP/6-31+G(d,p)                               | B3LYP/6-31G(d)                                  | 8.23 | 11.61 |
| 63 | B3LYP/6-31+G(d,p)                               | B3LYP/6-31G(d) PCM/CHCl <sub>3</sub>            | 8.28 | 12.75 |
| 64 | B3LYP/6-31+G(d,p)                               | B3LYP/6-311+G(2d,p)                             | 2.83 | 10.04 |
| 65 | B3LYP/6-31+G(d,p)                               | B3LYP/6-311+G(2d,p) PCM/CHCl <sub>3</sub>       | 2.62 | 8.51  |
| 66 | B3LYP/6-31+G(d,p)                               | B3LYP/cc-pVDZ                                   | 3.22 | 9.41  |
| 67 | B3LYP/6-31+G(d,p)                               | B3LYP/cc-pVDZ PCM/CHCl <sub>3</sub>             | 3.07 | 8.25  |
| 68 | B3LYP/6-31+G(d,p)                               | B3LYP/aug-cc-pVDZ                               | 3.60 | 10.07 |
| 69 | B3LYP/6-31+G(d,p)                               | B3LYP/aug-cc-pVDZ PCM/CHCl <sub>3</sub>         | 3.40 | 8.66  |
| 70 | B3LYP/6-31+G(d,p)                               | BMK/6-31G(d)                                    | 2.40 | 9.53  |
| 71 | B3LYP/6-31+G(d,p)                               | BMK/6-31G(d) PCM/CHCl <sub>3</sub>              | 2.25 | 8.17  |
| 72 | B3LYP/6-31+G(d,p)                               | BMK/6-311G(d)                                   | 2.01 | 11.52 |
| 73 | B3LYP/6-31+G(d,p)                               | BMK/6-311G(d) PCM/CHCl <sub>3</sub>             | 1.84 | 10.01 |
| 74 | B3LYP/6-31+G(d,p)                               | mPW1PW91/6-311+G(2d,p)                          | 2.00 | 9.88  |
| 75 | B3LYP/6-31+G(d,p)                               | mPW1PW91/6-311+G(2d,p)<br>PCM/CHCl <sub>3</sub> | 1.71 | 7.03  |
| 76 | B3LYP/6-31+G(d,p)                               | PBE0/6-311+G(2d,p)                              | 2.05 | 10.03 |
| 77 | B3LYP/6-31+G(d,p)                               | PBE0/6-311+G(2d,p) PCM/CHCl <sub>3</sub>        | 1.77 | 7.17  |
| 78 | B3LYP/6-31+G(d,p)                               | WC04/6-31G(d)                                   | 2.79 | 7.35  |
| 79 | B3LYP/6-31+G(d,p)                               | WC04/6-31G(d) PCM/CHCl <sub>3</sub>             | 2.87 | 7.21  |
| 80 | mPW1PW91/6-311+G(2d,p)<br>SMD/CHCl <sub>3</sub> | mPW1PW91/6-311+G(2d,p)<br>SMD/CHCl <sub>3</sub> | 1.66 | 8.50  |

**Table S3.** Comparison of the experimental and the mPW1PW91/6-311+G(2d,p) // B3LYP/6-31+G(d,p)  $^{13}\text{C}$  NMR data of (2*S*,6*R*,7*S*,8*R*)-**1** (isomer 1), (2*R*,6*R*,7*S*,8*R*)-**1** (isomer 2), (2*R*,6*R*,7*S*,8*S*)-**1** (isomer 3) and (2*S*,6*R*,7*S*,8*S*)-**1** (isomer 4). For a better comparison  $\Delta\delta$  values over 2.5 were marked with yellow and those over 5.0 with red. (Supplementary table for Table 2)

| Carbon | $\delta_{\text{Exp}}$<br>(ppm) | $\delta_{\text{calc}}$ isomer 1<br>(ppm) | $\delta_{\text{calc}}$ isomer 2<br>(ppm) | $\delta_{\text{calc}}$ isomer 3<br>(ppm) | $\delta_{\text{calc}}$ isomer 4<br>(ppm) | $\Delta\delta$ isomer 1<br>(ppm) | $\Delta\delta$ isomer 2<br>(ppm) | $\Delta\delta$ isomer 3<br>(ppm) | $\Delta\delta$ isomer 4<br>(ppm) |
|--------|--------------------------------|------------------------------------------|------------------------------------------|------------------------------------------|------------------------------------------|----------------------------------|----------------------------------|----------------------------------|----------------------------------|
| C-1    | 48.60                          | 47.38                                    | 47.35                                    | 47.63                                    | 47.37                                    | 1.22                             | 1.25                             | 0.97                             | 1.23                             |
| C-2    | 69.20                          | 68.48                                    | 72.76                                    | 68.56                                    | 70.89                                    | 0.72                             | 3.56                             | 0.64                             | 1.69                             |
| C-3    | 133.90                         | 136.99                                   | 136.29                                   | 136.85                                   | 137.06                                   | 3.09                             | 2.39                             | 2.95                             | 3.16                             |
| C-4    | 135.10                         | 137.96                                   | 134.97                                   | 137.92                                   | 135.50                                   | 2.86                             | 0.13                             | 2.82                             | 0.40                             |
| C-5    | 44.00                          | 41.63                                    | 46.98                                    | 47.74                                    | 41.89                                    | 2.37                             | 2.98                             | 3.74                             | 2.11                             |
| C-6    | 70.80                          | 77.08                                    | 75.36                                    | 79.29                                    | 82.05                                    | 6.28                             | 4.56                             | 8.49                             | 11.25                            |
| C-7    | 52.90                          | 50.46                                    | 53.26                                    | 52.72                                    | 49.94                                    | 2.44                             | 0.36                             | 0.18                             | 2.96                             |
| C-8    | 75.30                          | 70.66                                    | 69.64                                    | 72.30                                    | 72.56                                    | 4.64                             | 5.66                             | 3.00                             | 2.74                             |
| C-9    | 129.30                         | 131.59                                   | 129.59                                   | 131.22                                   | 128.98                                   | 2.29                             | 0.29                             | 1.92                             | 0.32                             |
| C-10   | 142.70                         | 141.00                                   | 141.15                                   | 145.51                                   | 146.24                                   | 1.70                             | 1.55                             | 2.81                             | 3.54                             |
| C-11   | 136.40                         | 138.95                                   | 138.88                                   | 138.41                                   | 138.84                                   | 2.55                             | 2.48                             | 2.01                             | 2.44                             |
| C-12   | 169.40                         | 168.07                                   | 167.75                                   | 167.40                                   | 167.51                                   | 1.33                             | 1.65                             | 2.00                             | 1.89                             |
| C-13   | 121.20                         | 125.85                                   | 125.67                                   | 129.57                                   | 128.67                                   | 4.65                             | 4.47                             | 8.37                             | 7.47                             |
| C-14   | 18.70                          | 17.40                                    | 18.16                                    | 17.69                                    | 18.54                                    | 1.30                             | 0.54                             | 1.01                             | 0.16                             |
| C-15   | 20.00                          | 20.97                                    | 17.60                                    | 16.83                                    | 21.09                                    | 0.97                             | 2.40                             | 3.17                             | 1.09                             |
| C-1'   | 171.80                         | 173.10                                   | 172.98                                   | 172.65                                   | 172.60                                   | 1.30                             | 1.18                             | 0.85                             | 0.80                             |
| C-2'   | 43.30                          | 42.40                                    | 42.51                                    | 42.73                                    | 42.77                                    | 0.90                             | 0.79                             | 0.57                             | 0.53                             |
| C-3'   | 25.40                          | 27.51                                    | 27.53                                    | 27.60                                    | 27.80                                    | 2.11                             | 2.13                             | 2.20                             | 2.40                             |
| C-4'   | 22.30                          | 20.53                                    | 20.47                                    | 20.36                                    | 20.44                                    | 1.77                             | 1.83                             | 1.94                             | 1.86                             |
| C-5'   | 22.30                          | 20.34                                    | 20.43                                    | 20.63                                    | 20.61                                    | 1.96                             | 1.87                             | 1.67                             | 1.69                             |
| MAE    | N/A                            | N/A                                      | N/A                                      | N/A                                      | N/A                                      | 2.32                             | 2.10                             | 2.57                             | 2.49                             |

**Table S4.** Comparison of the experimental and the mPW1PW91/6-311+G(2d,p) SMD /CHCl<sub>3</sub> // B3LYP/6-31+G(d,p) <sup>13</sup>C NMR data of (2*S*,6*R*,7*S*,8*R*)-**1** (isomer 1), (2*R*,6*R*,7*S*,8*R*)-**1** (isomer 2), (2*R*,6*R*,7*S*,8*S*)-**1** (isomer 3) and (2*S*,6*R*,7*S*,8*S*)-**1** (isomer 4). For a better comparison Δδ values over 2.5 were marked with yellow and those over 5.0 with red. (Supplementary table for Table 2)

| Carbon | δ <sub>Exp</sub><br>(ppm) | δ <sub>calc</sub> isomer 1<br>(ppm) | δ <sub>calc</sub> isomer 2<br>(ppm) | δ <sub>calc</sub> isomer 3<br>(ppm) | δ <sub>calc</sub> isomer 4<br>(ppm) | Δδ isomer 1<br>(ppm) | Δδ isomer 2<br>(ppm) | Δδ isomer 3<br>(ppm) | Δδ isomer 4<br>(ppm) |
|--------|---------------------------|-------------------------------------|-------------------------------------|-------------------------------------|-------------------------------------|----------------------|----------------------|----------------------|----------------------|
| C-1    | 48.60                     | 46.83                               | 46.96                               | 47.07                               | 46.66                               | 1.77                 | 1.64                 | 1.53                 | 1.94                 |
| C-2    | 69.20                     | 67.77                               | 72.34                               | 68.14                               | 70.46                               | 1.43                 | 3.14                 | 1.06                 | 1.26                 |
| C-3    | 133.90                    | 134.45                              | 134.37                              | 134.16                              | 134.45                              | 0.55                 | 0.47                 | 0.26                 | 0.55                 |
| C-4    | 135.10                    | 136.54                              | 133.84                              | 136.93                              | 134.42                              | 1.44                 | 1.26                 | 1.83                 | 0.68                 |
| C-5    | 44.00                     | 41.47                               | 46.10                               | 46.85                               | 41.59                               | 2.53                 | 2.10                 | 2.85                 | 2.41                 |
| C-6    | 70.80                     | 77.35                               | 75.64                               | 79.30                               | 81.80                               | 6.55                 | 4.84                 | 8.50                 | 11.00                |
| C-7    | 52.90                     | 50.31                               | 52.94                               | 52.18                               | 49.50                               | 2.59                 | 0.04                 | 0.72                 | 3.40                 |
| C-8    | 75.30                     | 70.72                               | 69.53                               | 71.82                               | 72.18                               | 4.58                 | 5.77                 | 3.48                 | 3.12                 |
| C-9    | 129.30                    | 128.62                              | 126.57                              | 128.85                              | 126.87                              | 0.68                 | 2.73                 | 0.45                 | 2.43                 |
| C-10   | 142.70                    | 140.76                              | 140.70                              | 143.99                              | 144.82                              | 1.94                 | 2.00                 | 1.29                 | 2.12                 |
| C-11   | 136.40                    | 137.27                              | 136.95                              | 136.77                              | 136.97                              | 0.87                 | 0.55                 | 0.37                 | 0.57                 |
| C-12   | 169.40                    | 168.42                              | 168.12                              | 167.81                              | 167.83                              | 0.98                 | 1.28                 | 1.59                 | 1.57                 |
| C-13   | 121.20                    | 126.11                              | 125.57                              | 128.64                              | 127.81                              | 4.91                 | 4.37                 | 7.44                 | 6.61                 |
| C-14   | 18.70                     | 17.36                               | 18.30                               | 17.70                               | 18.60                               | 1.34                 | 0.40                 | 1.00                 | 0.10                 |
| C-15   | 20.00                     | 20.88                               | 17.38                               | 16.87                               | 21.17                               | 0.88                 | 2.62                 | 3.13                 | 1.17                 |
| C-1'   | 171.80                    | 172.41                              | 172.26                              | 171.84                              | 171.97                              | 0.61                 | 0.46                 | 0.04                 | 0.17                 |
| C-2'   | 43.30                     | 42.58                               | 42.58                               | 42.65                               | 42.75                               | 0.72                 | 0.72                 | 0.65                 | 0.55                 |
| C-3'   | 25.40                     | 27.99                               | 28.14                               | 28.32                               | 28.54                               | 2.59                 | 2.74                 | 2.92                 | 3.14                 |
| C-4'   | 22.30                     | 20.26                               | 20.19                               | 20.16                               | 20.23                               | 2.04                 | 2.11                 | 2.14                 | 2.07                 |
| C-5'   | 22.30                     | 20.14                               | 20.22                               | 20.43                               | 20.40                               | 2.16                 | 2.08                 | 1.87                 | 1.90                 |
| MAE    | N/A                       | N/A                                 | N/A                                 | N/A                                 | N/A                                 | 2.06                 | 2.07                 | 2.16                 | 2.34                 |

**Table S5.** Comparison of the experimental and the mPW1PW91/6-311+G(2d,p) SMD /CHCl<sub>3</sub> // mPW1PW91/6-311+G(2d,p) SMD /CHCl<sub>3</sub> <sup>13</sup>C NMR data of (2*S*,6*R*,7*S*,8*R*)-**1** (isomer 1), (2*R*,6*R*,7*S*,8*R*)-**1** (isomer 2), (2*R*,6*R*,7*S*,8*S*)-**1** (isomer 3) and (2*S*,6*R*,7*S*,8*S*)-**1** (isomer 4). For a better comparison  $\Delta\delta$  values over 2.5 were marked with yellow and those over 5.0 with red. (Supplementary table for Table 2)

| Carbon | $\delta_{\text{Exp}}$<br>(ppm) | $\delta_{\text{calc}}$ isomer 1<br>(ppm) | $\delta_{\text{calc}}$ isomer 2<br>(ppm) | $\delta_{\text{calc}}$ isomer 3<br>(ppm) | $\delta_{\text{calc}}$ isomer 4<br>(ppm) | $\Delta\delta$ isomer 1<br>(ppm) | $\Delta\delta$ isomer 2<br>(ppm) | $\Delta\delta$ isomer 3<br>(ppm) | $\Delta\delta$ isomer 4<br>(ppm) |
|--------|--------------------------------|------------------------------------------|------------------------------------------|------------------------------------------|------------------------------------------|----------------------------------|----------------------------------|----------------------------------|----------------------------------|
| C-1    | 48.60                          | 48.53                                    | 48.46                                    | 48.23                                    | 48.10                                    | 0.07                             | 0.14                             | 0.37                             | 0.50                             |
| C-2    | 69.20                          | 67.60                                    | 72.83                                    | 67.90                                    | 69.65                                    | 1.60                             | 3.63                             | 1.30                             | 0.45                             |
| C-3    | 133.90                         | 136.96                                   | 135.38                                   | 136.09                                   | 136.34                                   | 3.06                             | 1.48                             | 2.19                             | 2.44                             |
| C-4    | 135.10                         | 136.39                                   | 134.99                                   | 137.49                                   | 135.59                                   | 1.29                             | 0.11                             | 2.39                             | 0.49                             |
| C-5    | 44.00                          | 41.23                                    | 47.03                                    | 47.83                                    | 41.89                                    | 2.77                             | 3.03                             | 3.83                             | 2.11                             |
| C-6    | 70.80                          | 78.46                                    | 76.47                                    | 79.92                                    | 82.14                                    | 7.66                             | 5.67                             | 9.12                             | 11.34                            |
| C-7    | 52.90                          | 49.68                                    | 52.53                                    | 53.22                                    | 49.57                                    | 3.22                             | 0.37                             | 0.32                             | 3.33                             |
| C-8    | 75.30                          | 72.32                                    | 70.60                                    | 71.39                                    | 71.96                                    | 2.98                             | 4.70                             | 3.91                             | 3.34                             |
| C-9    | 129.30                         | 130.41                                   | 128.73                                   | 130.43                                   | 128.69                                   | 1.11                             | 0.57                             | 1.13                             | 0.61                             |
| C-10   | 142.70                         | 142.52                                   | 141.97                                   | 145.03                                   | 146.70                                   | 0.18                             | 0.73                             | 2.33                             | 4.00                             |
| C-11   | 136.40                         | 139.21                                   | 139.02                                   | 137.63                                   | 138.23                                   | 2.81                             | 2.62                             | 1.23                             | 1.83                             |
| C-12   | 169.40                         | 169.88                                   | 169.48                                   | 169.24                                   | 169.33                                   | 0.48                             | 0.08                             | 0.16                             | 0.07                             |
| C-14   | 18.70                          | 17.94                                    | 18.88                                    | 18.14                                    | 19.35                                    | 0.76                             | 0.18                             | 0.56                             | 0.65                             |
| C-13   | 121.20                         | 127.80                                   | 127.21                                   | 130.83                                   | 129.86                                   | 6.60                             | 6.01                             | 9.63                             | 8.66                             |
| C-15   | 20.00                          | 22.00                                    | 18.21                                    | 17.51                                    | 22.10                                    | 2.00                             | 1.79                             | 2.49                             | 2.10                             |
| C-1'   | 171.80                         | 173.56                                   | 173.40                                   | 173.04                                   | 173.15                                   | 1.76                             | 1.60                             | 1.24                             | 1.35                             |
| C-2'   | 43.30                          | 43.71                                    | 43.83                                    | 43.95                                    | 43.73                                    | 0.41                             | 0.53                             | 0.65                             | 0.43                             |
| C-3'   | 25.40                          | 27.87                                    | 28.39                                    | 28.60                                    | 28.29                                    | 2.47                             | 2.99                             | 3.20                             | 2.89                             |
| C-4'   | 22.30                          | 21.59                                    | 21.47                                    | 21.53                                    | 21.61                                    | 0.71                             | 0.83                             | 0.77                             | 0.69                             |
| C-5'   | 22.30                          | 21.20                                    | 21.46                                    | 21.48                                    | 21.41                                    | 1.10                             | 0.84                             | 0.82                             | 0.89                             |
| MAE    | N/A                            | N/A                                      | N/A                                      | N/A                                      | N/A                                      | 2.15                             | 1.89                             | 2.38                             | 2.41                             |

**Table S6.** Comparison of the experimental and the mPW1PW91/6-31G(d) // M06-2X/6-31G(d)  $^{13}\text{C}$  NMR data of (1*R*,5*S*,6*R*,7*R*,8*R*,10*R*)-**3** and (1*R*,5*S*,6*R*,7*R*,8*S*,10*R*)-**3**. For a better comparison  $\Delta\delta$  values over 2.5 were marked with yellow and those over 5.0 with red. (Supplementary table for Table 3)

| Carbon | $\delta_{\text{Exp}}$<br>(ppm) | $\delta_{\text{calc}}$ (8 <i>R</i> )-epimer<br>(ppm) | $\delta_{\text{calc}}$ (8 <i>S</i> )-epimer<br>(ppm) | $\Delta\delta$ (8 <i>R</i> )-epimer<br>(ppm) | $\Delta\delta$ (8 <i>S</i> )-epimer<br>(ppm) |
|--------|--------------------------------|------------------------------------------------------|------------------------------------------------------|----------------------------------------------|----------------------------------------------|
| C-1    | 78.80                          | 79.24                                                | 78.81                                                | 0.44                                         | 0.01                                         |
| C-2    | 31.10                          | 31.78                                                | 31.53                                                | 0.68                                         | 0.43                                         |
| C-3    | 33.50                          | 33.88                                                | 33.95                                                | 0.38                                         | 0.45                                         |
| C-4    | 142.00                         | 144.08                                               | 144.19                                               | 2.08                                         | 2.19                                         |
| C-5    | 53.70                          | 54.53                                                | 53.22                                                | 0.83                                         | 0.48                                         |
| C-6    | 75.20                          | 73.49                                                | 75.69                                                | 1.71                                         | 0.49                                         |
| C-7    | 52.20                          | 54.57                                                | 52.70                                                | 2.37                                         | 0.50                                         |
| C-8    | 65.90                          | 66.65                                                | 71.18                                                | 0.75                                         | 5.28                                         |
| C-9    | 40.60                          | 40.28                                                | 41.13                                                | 0.32                                         | 0.53                                         |
| C-10   | 42.80                          | 43.43                                                | 42.85                                                | 0.63                                         | 0.05                                         |
| C-11   | 134.80                         | 138.03                                               | 140.55                                               | 3.23                                         | 5.75                                         |
| C-12   | 170.00                         | 168.47                                               | 168.48                                               | 1.53                                         | 1.52                                         |
| C-13   | 119.60                         | 126.66                                               | 123.76                                               | 7.06                                         | 4.16                                         |
| C-14   | 13.80                          | 13.73                                                | 12.81                                                | 0.07                                         | 0.99                                         |
| C-15   | 111.10                         | 117.12                                               | 117.39                                               | 6.02                                         | 6.29                                         |
| C-1'   | 172.30                         | 173.08                                               | 172.95                                               | 0.78                                         | 0.65                                         |
| C-2'   | 43.80                          | 43.51                                                | 42.63                                                | 0.29                                         | 1.17                                         |
| C-3'   | 25.60                          | 27.38                                                | 26.12                                                | 1.78                                         | 0.52                                         |
| C-4'   | 22.60                          | 22.30                                                | 21.62                                                | 0.30                                         | 0.98                                         |
| C-5'   | 22.60                          | 21.18                                                | 21.41                                                | 1.42                                         | 1.19                                         |
| MAE    | N/A                            | N/A                                                  | N/A                                                  | 1.63                                         | 1.68                                         |

**Table S7.** Comparison of the experimental and the mPW1PW91/6-31G(d) SMD/CHCl<sub>3</sub> // M06-2X/6-31G(d) <sup>13</sup>C NMR data of (1*R*,5*S*,6*R*,7*R*,8*R*,10*R*)-**3** and (1*R*,5*S*,6*R*,7*R*,8*S*,10*R*)-**3**. For a better comparison  $\Delta\delta$  values over 2.5 were marked with yellow and those over 5.0 with red. (Supplementary table for Table 3)

| Carbon | $\delta_{\text{Exp}}$<br>(ppm) | $\delta_{\text{calc}}$ (8 <i>R</i> )-epimer<br>(ppm) | $\delta_{\text{calc}}$ (8 <i>S</i> )-epimer<br>(ppm) | $\Delta\delta$ (8 <i>R</i> )-epimer<br>(ppm) | $\Delta\delta$ (8 <i>S</i> )-epimer<br>(ppm) |
|--------|--------------------------------|------------------------------------------------------|------------------------------------------------------|----------------------------------------------|----------------------------------------------|
| C-1    | 78.80                          | 78.21                                                | 77.78                                                | 0.59                                         | 1.02                                         |
| C-2    | 31.10                          | 31.66                                                | 31.47                                                | 0.56                                         | 0.37                                         |
| C-3    | 33.50                          | 33.83                                                | 33.87                                                | 0.33                                         | 0.37                                         |
| C-4    | 142.00                         | 145.98                                               | 145.94                                               | 3.98                                         | 3.94                                         |
| C-5    | 53.70                          | 53.85                                                | 52.62                                                | 0.15                                         | 1.08                                         |
| C-6    | 75.20                          | 73.88                                                | 75.79                                                | 1.32                                         | 0.59                                         |
| C-7    | 52.20                          | 54.14                                                | 52.24                                                | 1.94                                         | 0.04                                         |
| C-8    | 65.90                          | 66.93                                                | 71.04                                                | 1.03                                         | 5.14                                         |
| C-9    | 40.60                          | 40.14                                                | 41.08                                                | 0.46                                         | 0.48                                         |
| C-10   | 42.80                          | 43.85                                                | 43.35                                                | 1.05                                         | 0.55                                         |
| C-11   | 134.80                         | 137.25                                               | 139.48                                               | 2.45                                         | 4.68                                         |
| C-12   | 170.00                         | 168.92                                               | 168.89                                               | 1.08                                         | 1.11                                         |
| C-13   | 119.60                         | 125.85                                               | 123.35                                               | 6.25                                         | 3.75                                         |
| C-14   | 13.80                          | 14.18                                                | 13.07                                                | 0.38                                         | 0.73                                         |
| C-15   | 111.10                         | 113.03                                               | 113.42                                               | 1.93                                         | 2.32                                         |
| C-1'   | 172.30                         | 172.46                                               | 172.41                                               | 0.16                                         | 0.11                                         |
| C-2'   | 43.80                          | 43.58                                                | 42.66                                                | 0.22                                         | 1.14                                         |
| C-3'   | 25.60                          | 27.89                                                | 26.81                                                | 2.29                                         | 1.21                                         |
| C-4'   | 22.60                          | 22.26                                                | 21.55                                                | 0.34                                         | 1.05                                         |
| C-5'   | 22.60                          | 21.20                                                | 21.40                                                | 1.40                                         | 1.20                                         |
| MAE    | N/A                            | N/A                                                  | N/A                                                  | 1.40                                         | 1.54                                         |

**Table S8.** Comparison of the experimental and the M06/6-31G(d) // B3LYP/6-31+G(d,p) <sup>13</sup>C NMR data of (1*R*,5*S*,6*R*,7*R*,8*R*,10*R*)-**3** and (1*R*,5*S*,6*R*,7*R*,8*S*,10*R*)-**3**. For a better comparison  $\Delta\delta$  values over 2.5 were marked with yellow and those over 5.0 with red. (Supplementary table for Table 3)

| Carbon | $\delta_{\text{Exp}}$<br>(ppm) | $\delta_{\text{calc}}$ (8 <i>R</i> )-epimer<br>(ppm) | $\delta_{\text{calc}}$ (8 <i>S</i> )-epimer<br>(ppm) | $\Delta\delta$ (8 <i>R</i> )-epimer<br>(ppm) | $\Delta\delta$ (8 <i>S</i> )-epimer<br>(ppm) |
|--------|--------------------------------|------------------------------------------------------|------------------------------------------------------|----------------------------------------------|----------------------------------------------|
| C-1    | 78.80                          | 78.21                                                | 77.77                                                | 0.59                                         | 1.03                                         |
| C-2    | 31.10                          | 30.05                                                | 29.90                                                | 1.05                                         | 1.20                                         |
| C-3    | 33.50                          | 31.94                                                | 32.01                                                | 1.56                                         | 1.49                                         |
| C-4    | 142.00                         | 141.61                                               | 141.55                                               | 0.39                                         | 0.45                                         |
| C-5    | 53.70                          | 52.22                                                | 50.43                                                | 1.48                                         | 3.27                                         |
| C-6    | 75.20                          | 72.79                                                | 74.89                                                | 2.41                                         | 0.31                                         |
| C-7    | 52.20                          | 51.23                                                | 50.17                                                | 0.97                                         | 2.03                                         |
| C-8    | 65.90                          | 64.55                                                | 69.26                                                | 1.35                                         | 3.36                                         |
| C-9    | 40.60                          | 39.84                                                | 41.42                                                | 0.76                                         | 0.82                                         |
| C-10   | 42.80                          | 42.35                                                | 41.83                                                | 0.45                                         | 0.97                                         |
| C-11   | 134.80                         | 134.37                                               | 136.79                                               | 0.43                                         | 1.99                                         |
| C-12   | 170.00                         | 167.08                                               | 167.15                                               | 2.92                                         | 2.85                                         |
| C-13   | 119.60                         | 125.14                                               | 124.74                                               | 5.54                                         | 5.14                                         |
| C-14   | 13.80                          | 13.44                                                | 12.64                                                | 0.36                                         | 1.16                                         |
| C-15   | 111.10                         | 116.71                                               | 116.85                                               | 5.61                                         | 5.75                                         |
| C-1'   | 172.30                         | 172.18                                               | 171.55                                               | 0.12                                         | 0.75                                         |
| C-2'   | 43.80                          | 40.89                                                | 40.82                                                | 2.91                                         | 2.98                                         |
| C-3'   | 25.60                          | 23.60                                                | 23.79                                                | 2.00                                         | 1.81                                         |
| C-4'   | 22.60                          | 21.28                                                | 21.15                                                | 1.32                                         | 1.45                                         |
| C-5'   | 22.60                          | 21.17                                                | 21.25                                                | 1.43                                         | 1.35                                         |
| MAE    | N/A                            | N/A                                                  | N/A                                                  | 1.68                                         | 2.01                                         |



**Table S9.** Comparison of the experimental and the OPBE0/6-31G(d) // B3LYP/6-31+G(d,p)  $^{13}\text{C}$  NMR data of (1*R*,5*S*,6*R*,7*R*,8*R*,10*R*)-**3** and (1*R*,5*S*,6*R*,7*R*,8*S*,10*R*)-**3**. For a better comparison  $\Delta\delta$  values over 2.5 were marked with yellow and those over 5.0 with red. (Supplementary table for Table 3)

| Carbon | $\delta_{\text{Exp}}$<br>(ppm) | $\delta_{\text{calc}}$ (8 <i>R</i> )-epimer<br>(ppm) | $\delta_{\text{calc}}$ (8 <i>S</i> )-epimer<br>(ppm) | $\Delta\delta$ (8 <i>R</i> )-epimer<br>(ppm) | $\Delta\delta$ (8 <i>S</i> )-epimer<br>(ppm) |
|--------|--------------------------------|------------------------------------------------------|------------------------------------------------------|----------------------------------------------|----------------------------------------------|
| C-1    | 78.80                          | 80.80                                                | 80.57                                                | 2.00                                         | 1.77                                         |
| C-2    | 31.10                          | 30.68                                                | 30.55                                                | 0.42                                         | 0.55                                         |
| C-3    | 33.50                          | 33.73                                                | 33.81                                                | 0.23                                         | 0.31                                         |
| C-4    | 142.00                         | 141.53                                               | 141.53                                               | 0.47                                         | 0.47                                         |
| C-5    | 53.70                          | 53.44                                                | 51.70                                                | 0.26                                         | 2.00                                         |
| C-6    | 75.20                          | 75.11                                                | 77.27                                                | 0.09                                         | 2.07                                         |
| C-7    | 52.20                          | 53.79                                                | 52.29                                                | 1.59                                         | 0.09                                         |
| C-8    | 65.90                          | 68.60                                                | 72.30                                                | 2.70                                         | 6.40                                         |
| C-9    | 40.60                          | 39.27                                                | 39.82                                                | 1.33                                         | 0.78                                         |
| C-10   | 42.80                          | 45.31                                                | 44.77                                                | 2.51                                         | 1.97                                         |
| C-11   | 134.80                         | 136.56                                               | 139.17                                               | 1.76                                         | 4.37                                         |
| C-12   | 170.00                         | 166.04                                               | 166.15                                               | 3.96                                         | 3.85                                         |
| C-13   | 119.60                         | 122.17                                               | 121.53                                               | 2.57                                         | 1.93                                         |
| C-14   | 13.80                          | 10.79                                                | 9.94                                                 | 3.01                                         | 3.86                                         |
| C-15   | 111.10                         | 115.49                                               | 115.56                                               | 4.39                                         | 4.46                                         |
| C-1'   | 172.30                         | 170.46                                               | 170.04                                               | 1.84                                         | 2.26                                         |
| C-2'   | 43.80                          | 40.96                                                | 40.90                                                | 2.84                                         | 2.90                                         |
| C-3'   | 25.60                          | 26.10                                                | 26.40                                                | 0.50                                         | 0.80                                         |
| C-4'   | 22.60                          | 19.64                                                | 19.46                                                | 2.96                                         | 3.14                                         |
| C-5'   | 22.60                          | 19.42                                                | 19.67                                                | 3.18                                         | 2.93                                         |
| MAE    | N/A                            | N/A                                                  | N/A                                                  | 1.93                                         | 2.35                                         |

**Table S10.** Comparison of the experimental and the mPW1PW91/6-31G(d) SMD/CHCl<sub>3</sub> // M06-2X/6-31G(d) <sup>13</sup>C NMR data of (2*S*,6*R*,7*S*,8*R*)-**1** (isomer 1), (2*R*,6*R*,7*S*,8*R*)-**1** (isomer 2), (2*R*,6*R*,7*S*,8*S*)-**1** (isomer 3) and (2*S*,6*R*,7*S*,8*S*)-**1** (isomer 4). For a better comparison  $\Delta\delta$  values over 2.5 were marked with yellow and those over 5.0 with red. (Supplementary table for Table 4)

| Carbon | $\delta_{\text{Exp}}$<br>(ppm) | $\delta_{\text{calc}}$ isomer 1<br>(ppm) | $\delta_{\text{calc}}$ isomer 2<br>(ppm) | $\delta_{\text{calc}}$ isomer 3<br>(ppm) | $\delta_{\text{calc}}$ isomer 4<br>(ppm) | $\Delta\delta$ isomer 1<br>(ppm) | $\Delta\delta$ isomer 2<br>(ppm) | $\Delta\delta$ isomer 3<br>(ppm) | $\Delta\delta$ isomer 4<br>(ppm) |
|--------|--------------------------------|------------------------------------------|------------------------------------------|------------------------------------------|------------------------------------------|----------------------------------|----------------------------------|----------------------------------|----------------------------------|
| C-1    | 48.60                          | 48.03                                    | 48.06                                    | 48.29                                    | 48.48                                    | 0.57                             | 0.54                             | 0.31                             | 0.12                             |
| C-2    | 69.20                          | 68.43                                    | 72.68                                    | 71.61                                    | 70.49                                    | 0.77                             | 3.48                             | 2.41                             | 1.29                             |
| C-3    | 133.90                         | 135.64                                   | 135.73                                   | 134.64                                   | 136.34                                   | 1.74                             | 1.83                             | 0.74                             | 2.44                             |
| C-4    | 135.10                         | 136.36                                   | 133.67                                   | 136.48                                   | 134.34                                   | 1.26                             | 1.43                             | 1.38                             | 0.76                             |
| C-5    | 44.00                          | 42.90                                    | 47.17                                    | 46.38                                    | 42.75                                    | 1.10                             | 3.17                             | 2.38                             | 1.25                             |
| C-6    | 70.80                          | 78.23                                    | 76.31                                    | 79.58                                    | 82.88                                    | 7.43                             | 5.51                             | 8.78                             | 12.08                            |
| C-7    | 52.90                          | 50.15                                    | 53.05                                    | 50.17                                    | 48.95                                    | 2.75                             | 0.15                             | 2.73                             | 3.95                             |
| C-8    | 75.30                          | 72.16                                    | 70.98                                    | 74.18                                    | 73.98                                    | 3.14                             | 4.32                             | 1.12                             | 1.32                             |
| C-9    | 129.30                         | 129.86                                   | 127.58                                   | 127.76                                   | 128.18                                   | 0.56                             | 1.72                             | 1.54                             | 1.12                             |
| C-10   | 142.70                         | 139.74                                   | 140.18                                   | 146.11                                   | 144.76                                   | 2.96                             | 2.52                             | 3.41                             | 2.06                             |
| C-11   | 136.40                         | 135.83                                   | 135.89                                   | 137.60                                   | 137.38                                   | 0.57                             | 0.51                             | 1.20                             | 0.98                             |
| C-12   | 169.40                         | 168.71                                   | 168.30                                   | 167.74                                   | 167.70                                   | 0.69                             | 1.10                             | 1.66                             | 1.70                             |
| C-13   | 121.20                         | 131.98                                   | 132.28                                   | 130.88                                   | 130.93                                   | 10.78                            | 11.08                            | 9.68                             | 9.73                             |
| C-14   | 18.70                          | 18.67                                    | 19.53                                    | 20.33                                    | 19.77                                    | 0.03                             | 0.83                             | 1.63                             | 1.07                             |
| C-15   | 20.00                          | 21.97                                    | 19.29                                    | 20.27                                    | 22.90                                    | 1.97                             | 0.71                             | 0.27                             | 2.90                             |
| C-1'   | 171.80                         | 172.42                                   | 172.30                                   | 171.90                                   | 172.19                                   | 0.62                             | 0.50                             | 0.10                             | 0.39                             |
| C-2'   | 43.30                          | 43.47                                    | 43.61                                    | 42.94                                    | 43.08                                    | 0.17                             | 0.31                             | 0.36                             | 0.22                             |
| C-3'   | 25.40                          | 27.48                                    | 27.82                                    | 27.53                                    | 27.76                                    | 2.08                             | 2.42                             | 2.13                             | 2.36                             |
| C-4'   | 22.30                          | 21.89                                    | 21.42                                    | 21.44                                    | 21.73                                    | 0.41                             | 0.88                             | 0.86                             | 0.57                             |
| C-5'   | 22.30                          | 22.35                                    | 22.30                                    | 22.07                                    | 21.75                                    | 0.05                             | 0.00                             | 0.23                             | 0.55                             |
| MAE    | N/A                            | N/A                                      | N/A                                      | N/A                                      | N/A                                      | 2.42                             | 2.59                             | 2.62                             | 2.85                             |

**Table S11.** Comparison of the experimental and the M06/6-31G(d) // B3LYP/6-31+G(d,p)  $^{13}\text{C}$  NMR data of (2*S*,6*R*,7*S*,8*R*)-**1** (isomer 1), (2*R*,6*R*,7*S*,8*R*)-**1** (isomer 2), (2*R*,6*R*,7*S*,8*S*)-**1** (isomer 3) and (2*S*,6*R*,7*S*,8*S*)-**1** (isomer 4). For a better comparison  $\Delta\delta$  values over 2.5 were marked with yellow and those over 5.0 with red. (Supplementary table for Table 4)

| Carbon | $\delta_{\text{Exp}}$<br>(ppm) | $\delta_{\text{calc}}$ isomer 1<br>(ppm) | $\delta_{\text{calc}}$ isomer 2<br>(ppm) | $\delta_{\text{calc}}$ isomer 3<br>(ppm) | $\delta_{\text{calc}}$ isomer 4<br>(ppm) | $\Delta\delta$ isomer 1<br>(ppm) | $\Delta\delta$ isomer 2<br>(ppm) | $\Delta\delta$ isomer 3<br>(ppm) | $\Delta\delta$ isomer 4<br>(ppm) |
|--------|--------------------------------|------------------------------------------|------------------------------------------|------------------------------------------|------------------------------------------|----------------------------------|----------------------------------|----------------------------------|----------------------------------|
| C-1    | 48.60                          | 46.43                                    | 46.94                                    | 46.73                                    | 46.71                                    | 2.17                             | 1.66                             | 1.87                             | 1.89                             |
| C-2    | 69.20                          | 66.75                                    | 71.55                                    | 67.12                                    | 68.87                                    | 2.45                             | 2.35                             | 2.08                             | 0.33                             |
| C-3    | 133.90                         | 135.66                                   | 136.06                                   | 136.20                                   | 136.48                                   | 1.76                             | 2.16                             | 2.30                             | 2.58                             |
| C-4    | 135.10                         | 134.88                                   | 131.50                                   | 134.90                                   | 132.61                                   | 0.22                             | 3.60                             | 0.20                             | 2.49                             |
| C-5    | 44.00                          | 40.65                                    | 45.43                                    | 46.88                                    | 40.51                                    | 3.35                             | 1.43                             | 2.88                             | 3.49                             |
| C-6    | 70.80                          | 76.76                                    | 74.92                                    | 78.82                                    | 81.71                                    | 5.96                             | 4.12                             | 8.02                             | 10.91                            |
| C-7    | 52.90                          | 48.06                                    | 50.87                                    | 49.80                                    | 47.09                                    | 4.84                             | 2.03                             | 3.10                             | 5.81                             |
| C-8    | 75.30                          | 70.35                                    | 69.43                                    | 72.62                                    | 73.04                                    | 4.95                             | 5.87                             | 2.68                             | 2.26                             |
| C-9    | 129.30                         | 131.49                                   | 129.63                                   | 130.89                                   | 128.49                                   | 2.19                             | 0.33                             | 1.59                             | 0.81                             |
| C-10   | 142.70                         | 137.05                                   | 138.25                                   | 142.00                                   | 143.43                                   | 5.65                             | 4.45                             | 0.70                             | 0.73                             |
| C-11   | 136.40                         | 135.63                                   | 135.31                                   | 134.57                                   | 135.12                                   | 0.77                             | 1.09                             | 1.83                             | 1.28                             |
| C-12   | 169.40                         | 166.47                                   | 165.87                                   | 165.71                                   | 165.96                                   | 2.93                             | 3.53                             | 3.69                             | 3.44                             |
| C-13   | 121.20                         | 127.98                                   | 128.25                                   | 132.94                                   | 132.11                                   | 6.78                             | 7.05                             | 11.74                            | 10.91                            |
| C-14   | 18.70                          | 17.33                                    | 17.83                                    | 17.53                                    | 18.49                                    | 1.37                             | 0.87                             | 1.17                             | 0.21                             |
| C-15   | 20.00                          | 21.35                                    | 18.09                                    | 16.03                                    | 20.82                                    | 1.35                             | 1.91                             | 3.97                             | 0.82                             |
| C-1'   | 171.80                         | 170.77                                   | 170.81                                   | 170.90                                   | 170.86                                   | 1.03                             | 0.99                             | 0.90                             | 0.94                             |
| C-2'   | 43.30                          | 40.43                                    | 40.53                                    | 40.52                                    | 40.74                                    | 2.87                             | 2.77                             | 2.78                             | 2.56                             |
| C-3'   | 25.40                          | 23.91                                    | 23.54                                    | 23.62                                    | 23.82                                    | 1.49                             | 1.86                             | 1.78                             | 1.58                             |
| C-4'   | 22.30                          | 20.88                                    | 20.73                                    | 21.02                                    | 21.13                                    | 1.42                             | 1.57                             | 1.28                             | 1.17                             |
| C-5'   | 22.30                          | 20.86                                    | 21.28                                    | 21.42                                    | 21.24                                    | 1.44                             | 1.02                             | 0.88                             | 1.06                             |
| MAE    | N/A                            | N/A                                      | N/A                                      | N/A                                      | N/A                                      | 3.12                             | 2.83                             | 3.19                             | 2.76                             |

**Table S12.** Comparison of the experimental and the mPW1PW91/6-311+G(2d,p) //  $\omega$ B97XD/6-31+G(d,p)  $^1\text{H}$  NMR data of (1*R*,5*S*,6*S*,7*S*,10*R*)-**2**. For a better comparison  $\Delta\delta$  values over 0.3 were marked with yellow and those over 0.6 with red. For the CMAE values of the protons the shielding constants related to the hydrogen atoms in the methyl group were averaged (same for the other  $^1\text{H}$  NMR tables).<sup>16</sup>

| Hydrogen  | $\delta_{\text{Exp}}$ (ppm) | $\delta_{\text{Calc}}$ (ppm) | $\Delta\delta$ (ppm) |
|-----------|-----------------------------|------------------------------|----------------------|
| H-1       | 3.42                        | 3.41                         | 0.01                 |
| H-2a      | 1.86                        | 1.63                         | 0.23                 |
| H-2b      | 1.86                        | 1.87                         | 0.01                 |
| H-3a      | 1.55                        | 2.09                         | 0.54                 |
| H-3b      | 2.07                        | 2.31                         | 0.24                 |
| H-5       | 1.75                        | 1.80                         | 0.05                 |
| H-6       | 3.71                        | 3.82                         | 0.11                 |
| H-7       | 2.33                        | 1.29                         | 1.04                 |
| H-8a      | 1.55                        | 1.35                         | 0.20                 |
| H-8b      | 1.92                        | 1.51                         | 0.41                 |
| H-9a      | 1.21                        | 1.12                         | 0.09                 |
| H-9b      | 1.28                        | 1.76                         | 0.48                 |
| H-11      | 2.24                        | 2.37                         | 0.13                 |
| H-12 (3x) | 0.87                        | 0.99                         | 0.12                 |
| H-13 (3x) | 0.95                        | 1.00                         | 0.05                 |
| H-14 (3x) | 0.71                        | 0.83                         | 0.12                 |
| H-15a     | 5.02                        | 5.05                         | 0.03                 |
| H-15b     | 4.74                        | 4.78                         | 0.04                 |
| MAE       | N/A                         | N/A                          | 0.19                 |

**Table S13.** Comparison of the experimental and the mPW1PW91/6-311+G(2d,p) SMD/CHCl<sub>3</sub> // ωB97XD/6-31+G(d,p) SMD/CHCl<sub>3</sub> <sup>1</sup>H NMR data of (1*R*,5*S*,6*S*,7*S*,10*R*)-**2**. For a better comparison Δδ values over 0.3 were marked with yellow and those over 0.6 with red.

| Hydrogen  | δ <sub>Exp</sub> (ppm) | δ <sub>Calc</sub> (ppm) | Δδ (ppm) |
|-----------|------------------------|-------------------------|----------|
| H-1       | 3.42                   | 3.46                    | 0.04     |
| H-2a      | 1.86                   | 1.59                    | 0.27     |
| H-2b      | 1.86                   | 1.82                    | 0.04     |
| H-3a      | 1.55                   | 2.11                    | 0.56     |
| H-3b      | 2.07                   | 2.33                    | 0.26     |
| H-5       | 1.75                   | 1.84                    | 0.09     |
| H-6       | 3.71                   | 3.87                    | 0.16     |
| H-7       | 2.33                   | 1.26                    | 1.07     |
| H-8a      | 1.55                   | 1.32                    | 0.23     |
| H-8b      | 1.92                   | 1.49                    | 0.43     |
| H-9a      | 1.21                   | 1.16                    | 0.05     |
| H-9b      | 1.28                   | 1.78                    | 0.50     |
| H-11      | 2.24                   | 2.23                    | 0.01     |
| H-12 (3x) | 0.87                   | 0.95                    | 0.08     |
| H-13 (3x) | 0.95                   | 0.98                    | 0.03     |
| H-14 (3x) | 0.71                   | 0.77                    | 0.06     |
| H-15a     | 5.02                   | 5.01                    | 0.01     |
| H-15b     | 4.74                   | 4.73                    | 0.01     |
| MAE       | N/A                    | N/A                     | 0.18     |

**Table S14.** Comparison of the experimental and the mPW1PW91/6-311+G(2d,p) //  $\omega$ B97XD/6-31+G(d,p)  $^{13}\text{C}$  NMR data of (1*R*,5*S*,6*R*,7*R*,8*R*,10*R*)-**3** and (1*R*,5*S*,6*R*,7*R*,8*S*,10*R*)-**3**. For a better comparison  $\Delta\delta$  values over 2.5 were marked with yellow and those over 5.0 with red. (Supplementary table for Table 7)

| Carbon | $\delta_{\text{Exp}}$<br>(ppm) | $\delta_{\text{calc}}$ (8 <i>R</i> )-epimer | $\delta_{\text{calc}}$ (8 <i>S</i> )-epimer | $\Delta\delta$ (8 <i>R</i> )-epimer | $\Delta\delta$ (8 <i>S</i> )-epimer |
|--------|--------------------------------|---------------------------------------------|---------------------------------------------|-------------------------------------|-------------------------------------|
| C-1    | 78.80                          | 77.74                                       | 77.34                                       | 1.06                                | 1.46                                |
| C-2    | 31.10                          | 33.15                                       | 33.46                                       | 2.05                                | 2.36                                |
| C-3    | 33.50                          | 35.02                                       | 35.12                                       | 1.52                                | 1.62                                |
| C-4    | 142.00                         | 145.15                                      | 145.14                                      | 3.15                                | 3.14                                |
| C-5    | 53.70                          | 54.85                                       | 53.24                                       | 1.15                                | 0.46                                |
| C-6    | 75.20                          | 71.76                                       | 74.36                                       | 3.44                                | 0.84                                |
| C-7    | 52.20                          | 54.01                                       | 52.63                                       | 1.81                                | 0.43                                |
| C-8    | 65.90                          | 64.32                                       | 68.43                                       | 1.58                                | 2.53                                |
| C-9    | 40.60                          | 40.66                                       | 41.54                                       | 0.06                                | 0.94                                |
| C-10   | 42.80                          | 44.86                                       | 44.03                                       | 2.06                                | 1.23                                |
| C-11   | 134.80                         | 136.67                                      | 140.52                                      | 1.87                                | 5.72                                |
| C-12   | 170.00                         | 166.26                                      | 166.31                                      | 3.74                                | 3.69                                |
| C-13   | 119.60                         | 122.64                                      | 120.08                                      | 3.04                                | 0.48                                |
| C-14   | 13.80                          | 12.65                                       | 11.33                                       | 1.15                                | 2.47                                |
| C-15   | 111.10                         | 112.54                                      | 112.83                                      | 1.44                                | 1.73                                |
| C-1'   | 172.30                         | 170.64                                      | 170.71                                      | 1.66                                | 1.59                                |
| C-2'   | 43.80                          | 43.59                                       | 43.23                                       | 0.21                                | 0.57                                |
| C-3'   | 25.60                          | 29.12                                       | 29.11                                       | 3.52                                | 3.51                                |
| C-4'   | 22.60                          | 21.97                                       | 21.44                                       | 0.63                                | 1.16                                |
| C-5'   | 22.60                          | 21.27                                       | 21.08                                       | 1.33                                | 1.52                                |
| MAE    | N/A                            | N/A                                         | N/A                                         | 1.82                                | 1.87                                |

**Table S15.** Comparison of the experimental and the mPW1PW91/6-311+G(2d,p) SMD/CHCl<sub>3</sub> // ωB97XD/6-31+G(d,p) SMD/CHCl<sub>3</sub> <sup>13</sup>C NMR data of (1*R*,5*S*,6*R*,7*R*,8*R*,10*R*)-**3** and (1*R*,5*S*,6*R*,7*R*,8*S*,10*R*)-**3**. For a better comparison Δδ values over 2.5 were marked with yellow and those over 5.0 with red. (Supplementary table for Table 7)

| Carbon | δ <sub>Exp</sub><br>(ppm) | δ <sub>calc</sub> (8 <i>R</i> )-epimer | δ <sub>calc</sub> (8 <i>S</i> )-epimer | Δδ (8 <i>R</i> )-epimer | Δδ (8 <i>S</i> )-epimer |
|--------|---------------------------|----------------------------------------|----------------------------------------|-------------------------|-------------------------|
| C-1    | 78.80                     | 77.51                                  | 77.35                                  | 1.29                    | 1.45                    |
| C-2    | 31.10                     | 32.71                                  | 32.86                                  | 1.61                    | 1.76                    |
| C-3    | 33.50                     | 35.50                                  | 35.66                                  | 2.00                    | 2.16                    |
| C-4    | 142.00                    | 147.87                                 | 147.33                                 | 5.87                    | 5.33                    |
| C-5    | 53.70                     | 53.78                                  | 52.42                                  | 0.08                    | 1.28                    |
| C-6    | 75.20                     | 73.68                                  | 75.76                                  | 1.52                    | 0.56                    |
| C-7    | 52.20                     | 52.82                                  | 52.47                                  | 0.62                    | 0.27                    |
| C-8    | 65.90                     | 65.40                                  | 68.45                                  | 0.50                    | 2.55                    |
| C-9    | 40.60                     | 40.43                                  | 41.66                                  | 0.17                    | 1.06                    |
| C-10   | 42.80                     | 45.90                                  | 45.11                                  | 3.10                    | 2.31                    |
| C-11   | 134.80                    | 136.25                                 | 139.09                                 | 1.45                    | 4.29                    |
| C-12   | 170.00                    | 168.02                                 | 168.04                                 | 1.98                    | 1.96                    |
| C-13   | 119.60                    | 120.91                                 | 120.30                                 | 1.31                    | 0.70                    |
| C-14   | 13.80                     | 13.46                                  | 11.55                                  | 0.34                    | 2.25                    |
| C-15   | 111.10                    | 108.45                                 | 108.51                                 | 2.65                    | 2.59                    |
| C-1'   | 172.30                    | 171.35                                 | 171.70                                 | 0.95                    | 0.60                    |
| C-2'   | 43.80                     | 44.08                                  | 43.81                                  | 0.28                    | 0.01                    |
| C-3'   | 25.60                     | 29.78                                  | 30.06                                  | 4.18                    | 4.46                    |
| C-4'   | 22.60                     | 21.78                                  | 21.49                                  | 0.82                    | 1.11                    |
| C-5'   | 22.60                     | 21.36                                  | 21.13                                  | 1.24                    | 1.47                    |
| MAE    | N/A                       | N/A                                    | N/A                                    | 1.60                    | 1.91                    |

**Table S16.** Comparison of the experimental and the mPW1PW91/6-311+G(2d,p) //  $\omega$ B97XD/6-31+G(d,p)  $^1\text{H}$  NMR data of (1*R*,5*S*,6*R*,7*R*,8*R*,10*R*)-**3** and (1*R*,5*S*,6*R*,7*R*,8*S*,10*R*)-**3**. For a better comparison  $\Delta\delta$  values over 0.3 were marked with yellow and those over 0.6 with red.

| Hydrogen  | $\delta_{\text{Exp}}$<br>(ppm) | $\delta_{\text{calc}}$ (8 <i>R</i> )-epimer<br>(ppm) | $\delta_{\text{calc}}$ (8 <i>S</i> )-epimer<br>(ppm) | $\Delta\delta$ (8 <i>R</i> )-epimer<br>(ppm) | $\Delta\delta$ (8 <i>S</i> )-epimer<br>(ppm) |
|-----------|--------------------------------|------------------------------------------------------|------------------------------------------------------|----------------------------------------------|----------------------------------------------|
| H-1       | 3.50                           | 3.51                                                 | 3.52                                                 | 0.01                                         | 0.02                                         |
| H-2a      | 1.81                           | 1.74                                                 | 1.72                                                 | 0.07                                         | 0.09                                         |
| H-2b      | 1.58                           | 1.55                                                 | 1.50                                                 | 0.03                                         | 0.08                                         |
| H-3a      | 2.35                           | 2.34                                                 | 2.33                                                 | 0.01                                         | 0.02                                         |
| H-3b      | 2.13                           | 2.18                                                 | 2.15                                                 | 0.05                                         | 0.02                                         |
| H-5       | 2.23                           | 2.18                                                 | 2.11                                                 | 0.05                                         | 0.12                                         |
| H-6       | 4.50                           | 4.39                                                 | 3.90                                                 | 0.11                                         | 0.60                                         |
| H-7       | 2.79                           | 2.61                                                 | 2.72                                                 | 0.18                                         | 0.07                                         |
| H-8       | 5.75                           | 5.92                                                 | 5.10                                                 | 0.17                                         | 0.65                                         |
| H-9a      | 2.31                           | 2.40                                                 | 2.77                                                 | 0.09                                         | 0.46                                         |
| H-9b      | 1.56                           | 1.51                                                 | 1.18                                                 | 0.05                                         | 0.38                                         |
| H-13a     | 6.15                           | 6.34                                                 | 6.24                                                 | 0.19                                         | 0.09                                         |
| H-13b     | 5.44                           | 5.90                                                 | 5.71                                                 | 0.46                                         | 0.27                                         |
| H-14a     | 5.01                           | 5.24                                                 | 5.23                                                 | 0.23                                         | 0.22                                         |
| H-14b     | 4.94                           | 5.21                                                 | 5.19                                                 | 0.27                                         | 0.25                                         |
| H-15 (3x) | 0.96                           | 1.24                                                 | 0.99                                                 | 0.28                                         | 0.03                                         |
| H-2'a     | 2.17                           | 2.22                                                 | 2.24                                                 | 0.05                                         | 0.07                                         |
| H-2'b     | 2.16                           | 2.19                                                 | 2.17                                                 | 0.03                                         | 0.01                                         |
| H-3'      | 2.06                           | 2.09                                                 | 2.18                                                 | 0.03                                         | 0.12                                         |
| H-4' (3x) | 0.93                           | 0.99                                                 | 1.05                                                 | 0.06                                         | 0.12                                         |
| H-5' (3x) | 0.92                           | 0.96                                                 | 1.03                                                 | 0.04                                         | 0.11                                         |
| CMAE      | N/A                            | N/A                                                  | N/A                                                  | 0.12                                         | 0.16                                         |



**Table S17.** Comparison of the experimental and the mPW1PW91/6-311+G(2d,p) SMD/CHCl<sub>3</sub> // ωB97XD/6-31+G(d,p) SMD/CHCl<sub>3</sub> <sup>1</sup>H NMR data of (1*R*,5*S*,6*R*,7*R*,8*R*,10*R*)-**3** and (1*R*,5*S*,6*R*,7*R*,8*S*,10*R*)-**3**. For a better comparison Δδ values over 0.3 were marked with yellow and those over 0.6 with red.

| Hydrogen  | δ <sub>Exp</sub><br>(ppm) | δ <sub>calc</sub> (8 <i>R</i> )-epimer<br>(ppm) | δ <sub>calc</sub> (8 <i>S</i> )-epimer<br>(ppm) | Δδ (8 <i>R</i> )-epimer<br>(ppm) | Δδ (8 <i>S</i> )-epimer<br>(ppm) |
|-----------|---------------------------|-------------------------------------------------|-------------------------------------------------|----------------------------------|----------------------------------|
| H-1       | 3.50                      | 3.46                                            | 3.42                                            | 0.04                             | 0.08                             |
| H-2a      | 1.81                      | 1.95                                            | 1.97                                            | 0.14                             | 0.16                             |
| H-2b      | 1.58                      | 1.57                                            | 1.53                                            | 0.01                             | 0.05                             |
| H-3a      | 2.35                      | 2.46                                            | 2.42                                            | 0.11                             | 0.07                             |
| H-3b      | 2.13                      | 2.29                                            | 2.27                                            | 0.16                             | 0.14                             |
| H-5       | 2.23                      | 2.45                                            | 2.38                                            | 0.22                             | 0.15                             |
| H-6       | 4.50                      | 4.63                                            | 4.21                                            | 0.13                             | 0.29                             |
| H-7       | 2.79                      | 2.93                                            | 2.98                                            | 0.14                             | 0.19                             |
| H-8       | 5.75                      | 5.79                                            | 5.21                                            | 0.04                             | 0.54                             |
| H-9a      | 2.31                      | 2.33                                            | 2.52                                            | 0.02                             | 0.21                             |
| H-9b      | 1.56                      | 1.66                                            | 1.36                                            | 0.10                             | 0.20                             |
| H-13a     | 6.15                      | 6.43                                            | 6.36                                            | 0.28                             | 0.21                             |
| H-13b     | 5.44                      | 5.83                                            | 5.92                                            | 0.39                             | 0.48                             |
| H-14a     | 5.01                      | 5.24                                            | 5.23                                            | 0.23                             | 0.22                             |
| H-14b     | 4.94                      | 5.12                                            | 5.05                                            | 0.18                             | 0.11                             |
| H-15 (3x) | 0.96                      | 1.04                                            | 0.86                                            | 0.08                             | 0.10                             |
| H-2'a     | 2.17                      | 2.30                                            | 2.37                                            | 0.13                             | 0.20                             |
| H-2'b     | 2.16                      | 2.30                                            | 2.29                                            | 0.14                             | 0.13                             |
| H-3'      | 2.06                      | 2.17                                            | 2.25                                            | 0.11                             | 0.19                             |
| H-4' (3x) | 0.93                      | 1.03                                            | 1.07                                            | 0.10                             | 0.14                             |
| H-5' (3x) | 0.92                      | 0.99                                            | 1.06                                            | 0.07                             | 0.14                             |
| CMAE      | N/A                       | N/A                                             | N/A                                             | 0.12                             | 0.18                             |

**Table S18.** Comparison of the experimental and the mPW1PW91/6-311+G(2d,p) //  $\omega$ B97XD/6-31+G(d,p)  $^{13}\text{C}$  NMR data of (2*S*,6*R*,7*S*,8*R*)-**1** (isomer 1), (2*R*,6*R*,7*S*,8*R*)-**1** (isomer 2), (2*R*,6*R*,7*S*,8*S*)-**1** (isomer 3) and (2*S*,6*R*,7*S*,8*S*)-**1** (isomer 4). For a better comparison  $\Delta\delta$  values over 2.5 were marked with yellow and those over 5.0 with red. (Supplementary table for Table 8)

| Carbon | $\delta_{\text{Exp}}$<br>(ppm) | $\delta_{\text{calc}}$ isomer 1<br>(ppm) | $\delta_{\text{calc}}$ isomer 2<br>(ppm) | $\delta_{\text{calc}}$ isomer 3<br>(ppm) | $\delta_{\text{calc}}$ isomer 4<br>(ppm) | $\Delta\delta$ isomer 1<br>(ppm) | $\Delta\delta$ isomer 2<br>(ppm) | $\Delta\delta$ isomer 3<br>(ppm) | $\Delta\delta$ isomer 4<br>(ppm) |
|--------|--------------------------------|------------------------------------------|------------------------------------------|------------------------------------------|------------------------------------------|----------------------------------|----------------------------------|----------------------------------|----------------------------------|
| C-1    | 48.60                          | 46.77                                    | 46.08                                    | 46.72                                    | 46.34                                    | 1.83                             | 2.52                             | 1.88                             | 2.26                             |
| C-2    | 69.20                          | 66.68                                    | 71.23                                    | 69.48                                    | 67.98                                    | 2.52                             | 2.03                             | 0.28                             | 1.22                             |
| C-3    | 133.90                         | 135.65                                   | 134.65                                   | 133.52                                   | 136.61                                   | 1.75                             | 0.75                             | 0.38                             | 2.71                             |
| C-4    | 135.10                         | 135.59                                   | 134.98                                   | 138.17                                   | 133.87                                   | 0.49                             | 0.12                             | 3.07                             | 1.23                             |
| C-5    | 44.00                          | 42.07                                    | 46.79                                    | 46.43                                    | 41.95                                    | 1.93                             | 2.79                             | 2.43                             | 2.05                             |
| C-6    | 70.80                          | 75.81                                    | 73.77                                    | 77.99                                    | 79.54                                    | 5.01                             | 2.97                             | 7.19                             | 8.74                             |
| C-7    | 52.90                          | 49.23                                    | 51.87                                    | 50.53                                    | 48.71                                    | 3.67                             | 1.03                             | 2.37                             | 4.19                             |
| C-8    | 75.30                          | 68.81                                    | 67.68                                    | 70.70                                    | 70.36                                    | 6.49                             | 7.62                             | 4.60                             | 4.94                             |
| C-9    | 129.30                         | 130.05                                   | 127.40                                   | 128.03                                   | 127.67                                   | 0.75                             | 1.90                             | 1.27                             | 1.63                             |
| C-10   | 142.70                         | 140.30                                   | 140.09                                   | 145.65                                   | 146.05                                   | 2.40                             | 2.61                             | 2.95                             | 3.35                             |
| C-11   | 136.40                         | 136.82                                   | 137.00                                   | 137.39                                   | 137.54                                   | 0.42                             | 0.60                             | 0.99                             | 1.14                             |
| C-12   | 169.40                         | 165.94                                   | 165.56                                   | 165.16                                   | 165.30                                   | 3.46                             | 3.84                             | 4.24                             | 4.10                             |
| C-13   | 121.20                         | 127.40                                   | 127.72                                   | 127.76                                   | 127.56                                   | 6.20                             | 6.52                             | 6.56                             | 6.36                             |
| C-14   | 18.70                          | 17.83                                    | 18.60                                    | 18.90                                    | 19.21                                    | 0.87                             | 0.10                             | 0.20                             | 0.51                             |
| C-15   | 20.00                          | 21.50                                    | 18.16                                    | 19.72                                    | 22.21                                    | 1.50                             | 1.84                             | 0.28                             | 2.21                             |
| C-1'   | 171.80                         | 170.72                                   | 170.65                                   | 169.95                                   | 169.89                                   | 1.08                             | 1.15                             | 1.85                             | 1.91                             |
| C-2'   | 43.30                          | 43.61                                    | 43.65                                    | 43.55                                    | 43.33                                    | 0.31                             | 0.35                             | 0.25                             | 0.03                             |
| C-3'   | 25.40                          | 29.58                                    | 29.47                                    | 28.93                                    | 29.35                                    | 4.18                             | 4.07                             | 3.53                             | 3.95                             |
| C-4'   | 22.30                          | 20.97                                    | 21.11                                    | 21.18                                    | 21.44                                    | 1.33                             | 1.19                             | 1.12                             | 0.86                             |
| C-5'   | 22.30                          | 21.86                                    | 21.61                                    | 21.43                                    | 21.47                                    | 0.44                             | 0.69                             | 0.87                             | 0.83                             |
| MAE    | N/A                            | N/A                                      | N/A                                      | N/A                                      | N/A                                      | 2.33                             | 2.48                             | 2.58                             | 3.11                             |

**Table S19.** Comparison of the experimental and the mPW1PW91/6-311+G(2d,p) SMD/CHCl<sub>3</sub> // ωB97XD/6-31+G(d,p) SMD/CHCl<sub>3</sub> <sup>13</sup>C NMR data of (2*S*,6*R*,7*S*,8*R*)-**1** (isomer 1), (2*R*,6*R*,7*S*,8*R*)-**1** (isomer 2), (2*R*,6*R*,7*S*,8*S*)-**1** (isomer 3) and (2*S*,6*R*,7*S*,8*S*)-**1** (isomer 4).

For a better comparison Δδ values over 2.5 were marked with yellow and those over 5.0 with red. (Supplementary table for Table 8)

| Carbon | δ <sub>Exp</sub><br>(ppm) | δ <sub>calc</sub> isomer 1<br>(ppm) | δ <sub>calc</sub> isomer 2<br>(ppm) | δ <sub>calc</sub> isomer 3<br>(ppm) | δ <sub>calc</sub> isomer 4<br>(ppm) | Δδ isomer 1<br>(ppm) | Δδ isomer 2<br>(ppm) | Δδ isomer 3<br>(ppm) | Δδ isomer 4<br>(ppm) |
|--------|---------------------------|-------------------------------------|-------------------------------------|-------------------------------------|-------------------------------------|----------------------|----------------------|----------------------|----------------------|
| C-1    | 48.60                     | 46.44                               | 45.88                               | 46.06                               | 46.06                               | 2.16                 | 2.72                 | 2.54                 | 2.54                 |
| C-2    | 69.20                     | 66.23                               | 71.22                               | 67.92                               | 67.30                               | 2.97                 | 2.02                 | 1.28                 | 1.90                 |
| C-3    | 133.90                    | 134.81                              | 133.29                              | 133.53                              | 135.28                              | 0.91                 | 0.61                 | 0.37                 | 1.38                 |
| C-4    | 135.10                    | 134.03                              | 134.25                              | 135.28                              | 133.42                              | 1.07                 | 0.85                 | 0.18                 | 1.68                 |
| C-5    | 44.00                     | 40.78                               | 46.05                               | 46.42                               | 41.18                               | 3.22                 | 2.05                 | 2.42                 | 2.82                 |
| C-6    | 70.80                     | 77.55                               | 75.60                               | 78.61                               | 80.11                               | 6.75                 | 4.80                 | 7.81                 | 9.31                 |
| C-7    | 52.90                     | 48.94                               | 51.26                               | 51.60                               | 48.62                               | 3.96                 | 1.64                 | 1.30                 | 4.28                 |
| C-8    | 75.30                     | 71.28                               | 69.48                               | 70.58                               | 70.79                               | 4.02                 | 5.82                 | 4.72                 | 4.51                 |
| C-9    | 129.30                    | 127.74                              | 125.79                              | 126.84                              | 125.74                              | 1.56                 | 3.51                 | 2.46                 | 3.56                 |
| C-10   | 142.70                    | 141.54                              | 140.81                              | 143.93                              | 146.64                              | 1.16                 | 1.89                 | 1.23                 | 3.94                 |
| C-11   | 136.40                    | 136.40                              | 136.65                              | 135.51                              | 136.39                              | 0.00                 | 0.25                 | 0.89                 | 0.01                 |
| C-12   | 169.40                    | 167.28                              | 166.94                              | 166.82                              | 167.11                              | 2.12                 | 2.46                 | 2.58                 | 2.29                 |
| C-13   | 121.20                    | 126.40                              | 127.11                              | 129.14                              | 128.38                              | 5.20                 | 5.91                 | 7.94                 | 7.18                 |
| C-14   | 18.70                     | 18.12                               | 18.79                               | 18.64                               | 19.63                               | 0.58                 | 0.09                 | 0.06                 | 0.93                 |
| C-15   | 20.00                     | 21.80                               | 18.26                               | 18.52                               | 22.12                               | 1.80                 | 1.74                 | 1.48                 | 2.12                 |
| C-1'   | 171.80                    | 171.22                              | 171.20                              | 170.99                              | 171.11                              | 0.58                 | 0.60                 | 0.81                 | 0.69                 |
| C-2'   | 43.30                     | 43.93                               | 44.06                               | 43.90                               | 43.89                               | 0.63                 | 0.76                 | 0.60                 | 0.59                 |
| C-3'   | 25.40                     | 29.88                               | 30.04                               | 29.73                               | 30.00                               | 4.48                 | 4.64                 | 4.33                 | 4.60                 |
| C-4'   | 22.30                     | 21.14                               | 21.21                               | 21.55                               | 21.35                               | 1.16                 | 1.09                 | 0.75                 | 0.95                 |
| C-5'   | 22.30                     | 21.44                               | 21.45                               | 21.43                               | 21.62                               | 0.86                 | 0.85                 | 0.87                 | 0.68                 |
| MAE    | N/A                       | N/A                                 | N/A                                 | N/A                                 | N/A                                 | 2.26                 | 2.42                 | 2.48                 | 3.23                 |

**Table S20.** Comparison of the experimental and the mPW1PW91/6-311+G(2d,p) //  $\omega$ B97XD/6-31+G(d,p)  $^1\text{H}$  NMR data of (2*S*,6*R*,7*S*,8*R*)-**1** (isomer 1), (2*R*,6*R*,7*S*,8*R*)-**1** (isomer 2), (2*R*,6*R*,7*S*,8*S*)-**1** (isomer 3) and (2*S*,6*R*,7*S*,8*S*)-**1** (isomer 4). For a better comparison  $\Delta\delta$  values over 0.3 were marked with yellow and those over 0.6 with red.

| Hydrogen  | $\delta_{\text{Exp}}$<br>(ppm) | $\delta_{\text{calc}}$ isomer 1<br>(ppm) | $\delta_{\text{calc}}$ isomer 2<br>(ppm) | $\delta_{\text{calc}}$ isomer 3<br>(ppm) | $\delta_{\text{calc}}$ isomer 4<br>(ppm) | $\Delta\delta$ isomer 1<br>(ppm) | $\Delta\delta$ isomer 2<br>(ppm) | $\Delta\delta$ isomer 3<br>(ppm) | $\Delta\delta$ isomer 4<br>(ppm) |
|-----------|--------------------------------|------------------------------------------|------------------------------------------|------------------------------------------|------------------------------------------|----------------------------------|----------------------------------|----------------------------------|----------------------------------|
| H-1a      | 2.02                           | 2.25                                     | 2.37                                     | 2.32                                     | 2.27                                     | 0.23                             | 0.35                             | 0.30                             | 0.25                             |
| H-1b      | 2.72                           | 2.68                                     | 2.55                                     | 2.49                                     | 2.56                                     | 0.04                             | 0.17                             | 0.23                             | 0.16                             |
| H-2       | 4.75                           | 4.69                                     | 4.87                                     | 4.70                                     | 4.80                                     | 0.06                             | 0.12                             | 0.05                             | 0.05                             |
| H-3       | 5.15                           | 5.23                                     | 5.28                                     | 5.33                                     | 5.27                                     | 0.08                             | 0.13                             | 0.18                             | 0.12                             |
| H-5a      | 2.76                           | 2.91                                     | 2.62                                     | 2.78                                     | 2.95                                     | 0.15                             | 0.14                             | 0.02                             | 0.19                             |
| H-5b      | 2.32                           | 1.68                                     | 2.07                                     | 2.15                                     | 1.73                                     | 0.64                             | 0.25                             | 0.17                             | 0.59                             |
| H-6       | 5.76                           | 4.51                                     | 4.43                                     | 3.91                                     | 4.10                                     | 1.25                             | 1.33                             | 1.85                             | 1.66                             |
| H-7       | 2.93                           | 2.76                                     | 2.78                                     | 3.02                                     | 2.93                                     | 0.17                             | 0.15                             | 0.09                             | 0.00                             |
| H-8       | 5.50                           | 6.34                                     | 6.47                                     | 5.14                                     | 5.05                                     | 0.84                             | 0.97                             | 0.36                             | 0.45                             |
| H-9       | 4.98                           | 5.28                                     | 4.96                                     | 5.04                                     | 5.18                                     | 0.30                             | 0.02                             | 0.06                             | 0.20                             |
| H-13a     | 6.30                           | 6.50                                     | 6.53                                     | 6.53                                     | 6.50                                     | 0.20                             | 0.23                             | 0.23                             | 0.20                             |
| H-13b     | 5.60                           | 5.82                                     | 5.94                                     | 6.10                                     | 5.96                                     | 0.22                             | 0.34                             | 0.50                             | 0.36                             |
| H-14 (3x) | 1.79                           | 1.66                                     | 1.89                                     | 1.94                                     | 1.88                                     | 0.13                             | 0.10                             | 0.15                             | 0.09                             |
| H-15 (3x) | 1.53                           | 1.86                                     | 1.65                                     | 1.77                                     | 1.77                                     | 0.33                             | 0.12                             | 0.24                             | 0.24                             |
| H-2'      | 2.16                           | 1.99                                     | 2.02                                     | 2.14                                     | 2.13                                     | 0.17                             | 0.14                             | 0.02                             | 0.03                             |
| H-2'      | 2.16                           | 2.14                                     | 2.10                                     | 2.23                                     | 2.18                                     | 0.02                             | 0.06                             | 0.07                             | 0.02                             |
| H-3'      | 2.05                           | 1.96                                     | 1.98                                     | 2.23                                     | 2.20                                     | 0.09                             | 0.07                             | 0.18                             | 0.15                             |
| H-4' (3x) | 0.92                           | 0.94                                     | 0.91                                     | 0.98                                     | 0.97                                     | 0.02                             | 0.01                             | 0.06                             | 0.05                             |
| H-5' (3x) | 0.90                           | 0.91                                     | 0.92                                     | 0.96                                     | 0.95                                     | 0.01                             | 0.02                             | 0.06                             | 0.05                             |
| CMAE      | N/A                            | N/A                                      | N/A                                      | N/A                                      | N/A                                      | 0.22                             | 0.19                             | 0.22                             | 0.21                             |

**Table S21.** Comparison of the experimental and the mPW1PW91/6-311+G(2d,p) SMD/CHCl<sub>3</sub> // ωB97XD/6-31+G(d,p) SMD/CHCl<sub>3</sub> <sup>1</sup>H NMR data of (2*S*,6*R*,7*S*,8*R*)-**1** (isomer 1), (2*R*,6*R*,7*S*,8*R*)-**1** (isomer 2), (2*R*,6*R*,7*S*,8*S*)-**1** (isomer 3) and (2*S*,6*R*,7*S*,8*S*)-**1** (isomer 4). For a better comparison Δδ values over 0.3 were marked with yellow and those over 0.6 with red.

| Hydrogen  | δ <sub>Exp</sub><br>(ppm) | δ <sub>calc</sub> isomer 1<br>(ppm) | δ <sub>calc</sub> isomer 2<br>(ppm) | δ <sub>calc</sub> isomer 3<br>(ppm) | δ <sub>calc</sub> isomer 4<br>(ppm) | Δδ isomer 1<br>(ppm) | Δδ isomer 2<br>(ppm) | Δδ isomer 3<br>(ppm) | Δδ isomer 4<br>(ppm) |
|-----------|---------------------------|-------------------------------------|-------------------------------------|-------------------------------------|-------------------------------------|----------------------|----------------------|----------------------|----------------------|
| H-1a      | 2.02                      | 2.17                                | 2.45                                | 2.56                                | 2.12                                | 0.15                 | 0.43                 | 0.16                 | 0.10                 |
| H-1b      | 2.72                      | 2.59                                | 2.46                                | 2.18                                | 2.61                                | 0.13                 | 0.26                 | 0.16                 | 0.11                 |
| H-2       | 4.75                      | 4.57                                | 4.87                                | 4.76                                | 4.79                                | 0.18                 | 0.12                 | 0.01                 | 0.04                 |
| H-3       | 5.15                      | 5.10                                | 5.33                                | 5.19                                | 5.21                                | 0.05                 | 0.18                 | 0.04                 | 0.06                 |
| H-5a      | 2.76                      | 2.81                                | 2.60                                | 2.54                                | 2.93                                | 0.05                 | 0.16                 | 0.22                 | 0.17                 |
| H-5b      | 2.32                      | 1.60                                | 2.15                                | 2.39                                | 1.80                                | 0.72                 | 0.17                 | 0.07                 | 0.52                 |
| H-6       | 5.76                      | 4.39                                | 4.57                                | 3.98                                | 4.32                                | 1.37                 | 1.19                 | 1.78                 | 1.44                 |
| H-7       | 2.93                      | 2.67                                | 2.95                                | 3.15                                | 3.15                                | 0.26                 | 0.02                 | 0.22                 | 0.22                 |
| H-8       | 5.50                      | 6.19                                | 6.25                                | 5.24                                | 4.87                                | 0.69                 | 0.75                 | 0.26                 | 0.63                 |
| H-9       | 4.98                      | 5.15                                | 4.96                                | 5.08                                | 5.34                                | 0.17                 | 0.02                 | 0.10                 | 0.36                 |
| H-13a     | 6.30                      | 6.35                                | 6.46                                | 6.51                                | 6.47                                | 0.05                 | 0.16                 | 0.21                 | 0.17                 |
| H-13b     | 5.60                      | 5.69                                | 6.00                                | 6.14                                | 6.05                                | 0.09                 | 0.40                 | 0.54                 | 0.45                 |
| H-14 (3x) | 1.79                      | 1.58                                | 1.86                                | 1.78                                | 1.84                                | 0.21                 | 0.07                 | 0.01                 | 0.05                 |
| H-15 (3x) | 1.53                      | 1.79                                | 1.67                                | 1.83                                | 1.81                                | 0.26                 | 0.14                 | 0.30                 | 0.28                 |
| H-2'      | 2.16                      | 1.91                                | 2.08                                | 2.18                                | 2.17                                | 0.25                 | 0.08                 | 0.02                 | 0.01                 |
| H-2'      | 2.16                      | 2.06                                | 2.18                                | 2.26                                | 2.27                                | 0.10                 | 0.02                 | 0.10                 | 0.11                 |
| H-3'      | 2.05                      | 1.88                                | 1.95                                | 2.16                                | 2.17                                | 0.17                 | 0.10                 | 0.11                 | 0.12                 |
| H-4' (3x) | 0.92                      | 0.88                                | 0.88                                | 0.95                                | 0.94                                | 0.04                 | 0.04                 | 0.03                 | 0.02                 |
| H-5' (3x) | 0.90                      | 0.85                                | 0.89                                | 0.92                                | 0.92                                | 0.05                 | 0.01                 | 0.02                 | 0.02                 |
| CMAE      | N/A                       | N/A                                 | N/A                                 | N/A                                 | N/A                                 | 0.23                 | 0.18                 | 0.19                 | 0.21                 |

**Table S22.** Level dependency of the Boltzmann populations illustrated on the most likely isomer of **1** [(2*S*,6*R*,7*S*,8*R*)-**1**, isomer 1] computed at the mPW1PW91/6-311+G(2d,p) // B3LYP/6-31+G(d,p) (method 1), mPW1PW91/6-311+G(2d,p) SMD/CHCl<sub>3</sub> // B3LYP/6-31+G(d,p) (method 2), mPW1PW91/6-311+G(2d,p) SMD/CHCl<sub>3</sub> // mPW1PW91/6-311+G(2d,p) SMD/CHCl<sub>3</sub> (method 3), mPW1PW91/6-31G(d) SMD/CHCl<sub>3</sub> // M06-2X/6-31G(d) (method 4), M06/6-31G(d) // B3LYP/6-31+G(d,p) (method 5), mPW1PW91/6-311+G(2d,p) // ωB97XD/6-31+G(d,p) (method 6) and mPW1PW91/6-311+G(2d,p) SMD/CHCl<sub>3</sub> // ωB97XD/6-31+G(d,p) SMD/CHCl<sub>3</sub> (method 7). Only DFT conformers ≥ 1% Boltzmann distributions were considered in each case.

| Conformers | method 1 | method 2 | method 3 | method 4 | method 5 | method 6 | method 7 |
|------------|----------|----------|----------|----------|----------|----------|----------|
| Conf. A    | 24.7 %   | 24.7 %   | 13.9 %   | 26.3 %   | 24.7 %   | 41.1 %   | 39.0 %   |
| Conf. B    | 21.9 %   | 21.9 %   | 13.2 %   | 12.6 %   | 21.9 %   | 13.5 %   | 11.9 %   |
| Conf. C    | 10.8 %   | 10.8 %   | 12.4 %   | 9.2 %    | 10.8 %   | 7.4 %    | 9.8 %    |
| Conf. D    | 7.4 %    | 7.4 %    | 9.1 %    | 4.9 %    | 7.4 %    | 5.1 %    | 6.3 %    |
| Conf. E    | 4.7 %    | 4.7 %    | 6.7 %    | 4.3 %    | 4.7 %    | 5.1 %    | 5.2 %    |
| Conf. F    | 4.4 %    | 4.4 %    | 4.5 %    | 4.2 %    | 4.4 %    | 4.3 %    | 4.1 %    |
| Conf. G    | 3.0 %    | 3.0 %    | 4.4 %    | 4.0 %    | 3.0 %    | 3.9 %    | 4.0 %    |
| Conf. H    | 3.0 %    | 3.0 %    | 4.3 %    | 3.7 %    | 3.0 %    | 3.1 %    | 3.4 %    |
| Conf. I    | 2.6 %    | 2.6 %    | 4.0 %    | 3.4 %    | 2.6 %    | 2.6 %    | 2.9 %    |
| Conf. J    | 2.6 %    | 2.6 %    | 3.6 %    | 3.2 %    | 2.6 %    | 2.4 %    | 2.6 %    |
| Conf. K    | 2.0 %    | 2.0 %    | 3.5 %    | 3.2 %    | 2.0 %    | 2.2 %    | 2.4 %    |
| Conf. L    | 1.7 %    | 1.7 %    | 3.2 %    | 2.3 %    | 1.7 %    | 2.0 %    | 2.2 %    |
| Conf. M    | 1.7 %    | 1.7 %    | 3.0 %    | 1.4 %    | 1.7 %    | 1.0 %    | 1.2 %    |
| Conf. N    | 1.6 %    | 1.6 %    | 2.5 %    | 1.4 %    | 1.6 %    | 1.0 %    | 1.0 %    |
| Conf. O    | 1.3 %    | 1.3 %    | 2.3 %    | 1.4 %    | 1.3 %    |          | 1.0 %    |
| Conf. P    | 1.3 %    | 1.3 %    | 1.9 %    | 1.1 %    | 1.3 %    |          |          |
| Conf. Q    |          |          |          | 1.0 %    |          |          |          |
| Conf. R    |          |          |          | 1.0 %    |          |          |          |

**Table S23.** Conformer dependency of the  $^{13}\text{C}$  chemical shifts at the mPW1PW91/6-311+G(2d,p) // B3LYP/6-31+G(d,p) level, illustrated on the most likely isomer of **1** [(2*S*,6*R*,7*S*,8*R*)-**1**, isomer 1]. For simplicity only the first 6 conformers were included.

| Carbon | $\delta_{\text{Exp}}$ (ppm) | $\delta_{\text{calc}}$ Conf. A (ppm) | $\delta_{\text{calc}}$ Conf. B (ppm) | $\delta_{\text{calc}}$ Conf. C (ppm) | $\delta_{\text{calc}}$ Conf. D (ppm) | $\delta_{\text{calc}}$ Conf. E (ppm) | $\delta_{\text{calc}}$ Conf. F (ppm) |
|--------|-----------------------------|--------------------------------------|--------------------------------------|--------------------------------------|--------------------------------------|--------------------------------------|--------------------------------------|
| C-1    | 48.60                       | 46.71                                | 46.71                                | 46.69                                | 46.66                                | 47.62                                | 47.57                                |
| C-2    | 69.20                       | 67.98                                | 67.93                                | 68.05                                | 67.98                                | 71.21                                | 71.23                                |
| C-3    | 133.90                      | 138.21                               | 138.12                               | 138.14                               | 138.23                               | 131.00                               | 131.23                               |
| C-4    | 135.10                      | 137.04                               | 137.12                               | 137.19                               | 136.96                               | 144.54                               | 144.45                               |
| C-5    | 44.00                       | 40.78                                | 40.68                                | 40.87                                | 40.74                                | 47.57                                | 47.62                                |
| C-6    | 70.80                       | 77.36                                | 77.29                                | 77.30                                | 77.43                                | 75.41                                | 75.37                                |
| C-7    | 52.90                       | 50.26                                | 50.03                                | 50.30                                | 50.04                                | 52.46                                | 52.43                                |
| C-8    | 75.30                       | 70.61                                | 71.18                                | 70.31                                | 71.14                                | 69.56                                | 69.78                                |
| C-9    | 129.30                      | 131.75                               | 131.78                               | 131.41                               | 132.00                               | 130.77                               | 130.76                               |
| C-10   | 142.70                      | 141.06                               | 141.22                               | 141.15                               | 141.17                               | 140.92                               | 141.02                               |
| C-11   | 136.40                      | 138.76                               | 139.21                               | 138.51                               | 139.24                               | 138.89                               | 139.21                               |
| C-12   | 169.40                      | 168.11                               | 168.09                               | 168.15                               | 168.39                               | 167.67                               | 167.60                               |
| C-13   | 121.20                      | 126.12                               | 125.56                               | 126.33                               | 125.77                               | 125.75                               | 125.13                               |
| C-14   | 18.70                       | 17.51                                | 17.50                                | 17.51                                | 17.56                                | 16.95                                | 16.87                                |
| C-15   | 20.00                       | 21.37                                | 21.32                                | 21.34                                | 21.40                                | 18.28                                | 18.28                                |
| C-1'   | 171.80                      | 173.35                               | 173.02                               | 172.89                               | 172.96                               | 173.36                               | 173.06                               |
| C-2'   | 43.30                       | 41.90                                | 41.95                                | 43.77                                | 44.35                                | 41.96                                | 42.13                                |
| C-3'   | 25.40                       | 26.71                                | 26.39                                | 29.86                                | 29.86                                | 26.72                                | 26.46                                |
| C-4'   | 22.30                       | 19.61                                | 21.26                                | 22.07                                | 19.52                                | 19.57                                | 21.27                                |
| C-5'   | 22.30                       | 21.25                                | 19.30                                | 19.47                                | 22.53                                | 21.26                                | 19.39                                |

**Table S24.** Conformer dependency of the  $^{13}\text{C}$  chemical shifts at the mPW1PW91/6-311+G(2d,p) SMD/ $\text{CHCl}_3$  // B3LYP/6-31+G(d,p) level, illustrated on the most likely isomer of **1** [(2*S*,6*R*,7*S*,8*R*)-**1**, isomer 1]. For simplicity only the first 6 conformers were included.

| Carbon | $\delta_{\text{Exp}}$ (ppm) | $\delta_{\text{calc}}$ Conf. A (ppm) | $\delta_{\text{calc}}$ Conf. B (ppm) | $\delta_{\text{calc}}$ Conf. C (ppm) | $\delta_{\text{calc}}$ Conf. D (ppm) | $\delta_{\text{calc}}$ Conf. E (ppm) | $\delta_{\text{calc}}$ Conf. F (ppm) |
|--------|-----------------------------|--------------------------------------|--------------------------------------|--------------------------------------|--------------------------------------|--------------------------------------|--------------------------------------|
| C-1    | 48.60                       | 46.27                                | 46.19                                | 46.37                                | 46.48                                | 46.94                                | 47.12                                |
| C-2    | 69.20                       | 67.34                                | 66.86                                | 67.55                                | 67.64                                | 70.32                                | 70.61                                |
| C-3    | 133.90                      | 135.57                               | 135.54                               | 135.23                               | 135.14                               | 129.56                               | 129.91                               |
| C-4    | 135.10                      | 135.90                               | 135.36                               | 136.15                               | 135.65                               | 142.09                               | 142.53                               |
| C-5    | 44.00                       | 40.53                                | 40.99                                | 40.49                                | 40.82                                | 46.44                                | 46.58                                |
| C-6    | 70.80                       | 77.61                                | 77.75                                | 77.27                                | 77.32                                | 76.15                                | 75.63                                |
| C-7    | 52.90                       | 50.06                                | 49.87                                | 50.34                                | 50.02                                | 52.09                                | 52.22                                |
| C-8    | 75.30                       | 70.62                                | 71.26                                | 70.54                                | 71.11                                | 69.54                                | 69.81                                |
| C-9    | 129.30                      | 128.85                               | 129.16                               | 127.97                               | 128.91                               | 128.03                               | 127.43                               |
| C-10   | 142.70                      | 140.62                               | 140.82                               | 141.17                               | 141.22                               | 140.27                               | 140.94                               |
| C-11   | 136.40                      | 137.71                               | 137.15                               | 136.98                               | 136.62                               | 136.99                               | 136.42                               |
| C-12   | 169.40                      | 168.57                               | 168.37                               | 168.49                               | 168.50                               | 168.04                               | 167.89                               |
| C-13   | 121.20                      | 126.66                               | 125.86                               | 126.26                               | 126.18                               | 125.04                               | 125.16                               |
| C-14   | 18.70                       | 17.50                                | 17.42                                | 17.46                                | 17.44                                | 17.02                                | 16.98                                |
| C-15   | 20.00                       | 21.19                                | 21.14                                | 21.27                                | 21.35                                | 18.50                                | 18.51                                |
| C-1'   | 171.80                      | 172.61                               | 172.29                               | 172.46                               | 172.37                               | 172.56                               | 172.26                               |
| C-2'   | 43.30                       | 42.09                                | 42.19                                | 44.04                                | 44.31                                | 42.05                                | 42.33                                |
| C-3'   | 25.40                       | 27.03                                | 26.67                                | 30.53                                | 31.41                                | 27.20                                | 26.75                                |
| C-4'   | 22.30                       | 19.41                                | 20.81                                | 21.76                                | 19.42                                | 19.48                                | 20.86                                |
| C-5'   | 22.30                       | 20.96                                | 19.24                                | 19.25                                | 22.14                                | 20.94                                | 19.25                                |



**Table S25.** Conformer dependency of the  $^{13}\text{C}$  chemical shifts at the mPW1PW91/6-311+G(2d,p) SMD/ $\text{CHCl}_3$  // mPW1PW91/6-311+G(2d,p) SMD/ $\text{CHCl}_3$  level, illustrated on the most likely isomer of **1** [(2*S*,6*R*,7*S*,8*R*)-**1**, isomer 1]. For simplicity only the first 6 conformers were included.

| Carbon | $\delta_{\text{Exp}}$ (ppm) | $\delta_{\text{calc}}$ Conf. A (ppm) | $\delta_{\text{calc}}$ Conf. B (ppm) | $\delta_{\text{calc}}$ Conf. C (ppm) | $\delta_{\text{calc}}$ Conf. D (ppm) | $\delta_{\text{calc}}$ Conf. E (ppm) | $\delta_{\text{calc}}$ Conf. F (ppm) |
|--------|-----------------------------|--------------------------------------|--------------------------------------|--------------------------------------|--------------------------------------|--------------------------------------|--------------------------------------|
| C-1    | 48.60                       | 47.12                                | 47.08                                | 47.32                                | 47.08                                | 47.28                                | 50.42                                |
| C-2    | 69.20                       | 67.03                                | 67.55                                | 67.21                                | 67.32                                | 67.49                                | 67.76                                |
| C-3    | 133.90                      | 137.60                               | 137.69                               | 137.41                               | 137.20                               | 137.63                               | 136.85                               |
| C-4    | 135.10                      | 136.38                               | 136.66                               | 136.63                               | 136.44                               | 136.44                               | 135.85                               |
| C-5    | 44.00                       | 41.37                                | 41.13                                | 41.62                                | 41.09                                | 41.29                                | 41.17                                |
| C-6    | 70.80                       | 78.60                                | 78.44                                | 78.51                                | 78.27                                | 78.32                                | 78.59                                |
| C-7    | 52.90                       | 49.45                                | 49.83                                | 49.75                                | 49.88                                | 49.39                                | 49.41                                |
| C-8    | 75.30                       | 72.99                                | 71.08                                | 71.70                                | 72.10                                | 74.31                                | 73.14                                |
| C-9    | 129.30                      | 130.56                               | 130.33                               | 130.69                               | 130.08                               | 131.15                               | 130.08                               |
| C-10   | 142.70                      | 142.86                               | 142.29                               | 142.68                               | 142.98                               | 142.63                               | 142.57                               |
| C-11   | 136.40                      | 139.75                               | 139.38                               | 138.71                               | 138.76                               | 139.44                               | 139.78                               |
| C-12   | 169.40                      | 169.88                               | 169.92                               | 169.81                               | 169.81                               | 170.05                               | 169.88                               |
| C-13   | 121.20                      | 127.77                               | 128.27                               | 128.11                               | 127.05                               | 128.19                               | 127.82                               |
| C-14   | 18.70                       | 18.04                                | 18.07                                | 18.07                                | 17.96                                | 17.94                                | 17.77                                |
| C-15   | 20.00                       | 21.77                                | 22.02                                | 21.76                                | 22.09                                | 21.75                                | 22.01                                |
| C-1'   | 171.80                      | 173.47                               | 173.72                               | 173.45                               | 173.54                               | 173.64                               | 173.45                               |
| C-2'   | 43.30                       | 43.17                                | 42.76                                | 43.53                                | 45.07                                | 45.62                                | 43.17                                |
| C-3'   | 25.40                       | 27.07                                | 27.00                                | 26.93                                | 29.67                                | 30.33                                | 27.08                                |
| C-4'   | 22.30                       | 22.15                                | 20.57                                | 22.08                                | 22.70                                | 20.54                                | 22.16                                |
| C-5'   | 22.30                       | 20.48                                | 22.09                                | 20.40                                | 20.35                                | 23.10                                | 20.48                                |

**Table S26.** Conformer dependency of the  $^{13}\text{C}$  chemical shifts at the mPW1PW91/6-31G(d) SMD/ $\text{CHCl}_3$  // M06-2X/6-31G(d) level, illustrated on the most likely isomer of **1** [(2*S*,6*R*,7*S*,8*R*)-**1**, isomer 1]. For simplicity only the first 6 conformers were included.

| Carbon | $\delta_{\text{Exp}}$ (ppm) | $\delta_{\text{calc}}$ Conf. A (ppm) | $\delta_{\text{calc}}$ Conf. B (ppm) | $\delta_{\text{calc}}$ Conf. C (ppm) | $\delta_{\text{calc}}$ Conf. D (ppm) | $\delta_{\text{calc}}$ Conf. E (ppm) | $\delta_{\text{calc}}$ Conf. F (ppm) |
|--------|-----------------------------|--------------------------------------|--------------------------------------|--------------------------------------|--------------------------------------|--------------------------------------|--------------------------------------|
| C-1    | 48.60                       | 47.38                                | 48.71                                | 47.41                                | 47.36                                | 48.56                                | 47.33                                |
| C-2    | 69.20                       | 67.74                                | 70.47                                | 67.57                                | 67.90                                | 70.60                                | 67.76                                |
| C-3    | 133.90                      | 137.47                               | 130.52                               | 137.44                               | 137.65                               | 130.65                               | 137.56                               |
| C-4    | 135.10                      | 134.37                               | 143.10                               | 134.21                               | 134.15                               | 142.87                               | 134.22                               |
| C-5    | 44.00                       | 41.50                                | 47.48                                | 41.09                                | 41.76                                | 47.71                                | 41.71                                |
| C-6    | 70.80                       | 78.84                                | 76.24                                | 79.22                                | 78.68                                | 76.10                                | 78.41                                |
| C-7    | 52.90                       | 49.54                                | 51.87                                | 49.63                                | 50.41                                | 51.92                                | 49.53                                |
| C-8    | 75.30                       | 72.19                                | 71.14                                | 73.16                                | 71.18                                | 71.25                                | 72.50                                |
| C-9    | 129.30                      | 130.72                               | 128.64                               | 129.65                               | 129.53                               | 128.58                               | 130.48                               |
| C-10   | 142.70                      | 139.68                               | 139.74                               | 140.06                               | 140.06                               | 139.68                               | 139.57                               |
| C-11   | 136.40                      | 135.75                               | 135.82                               | 135.59                               | 135.32                               | 135.89                               | 135.72                               |
| C-12   | 169.40                      | 168.85                               | 168.22                               | 169.05                               | 168.84                               | 168.15                               | 168.79                               |
| C-13   | 121.20                      | 132.10                               | 132.17                               | 131.98                               | 131.86                               | 132.93                               | 132.97                               |
| C-14   | 18.70                       | 18.90                                | 18.27                                | 18.80                                | 18.59                                | 18.20                                | 18.70                                |
| C-15   | 20.00                       | 22.79                                | 19.16                                | 22.81                                | 22.95                                | 19.21                                | 22.98                                |
| C-1'   | 171.80                      | 172.32                               | 172.32                               | 172.64                               | 173.44                               | 171.70                               | 172.04                               |
| C-2'   | 43.30                       | 44.61                                | 44.36                                | 42.29                                | 43.11                                | 42.42                                | 42.42                                |
| C-3'   | 25.40                       | 28.62                                | 28.84                                | 24.93                                | 28.14                                | 26.56                                | 26.82                                |
| C-4'   | 22.30                       | 21.99                                | 20.99                                | 22.71                                | 24.70                                | 21.72                                | 21.37                                |
| C-5'   | 22.30                       | 23.61                                | 23.52                                | 20.01                                | 23.96                                | 20.14                                | 20.34                                |

**Table S27.** Conformer dependency of the  $^{13}\text{C}$  chemical shifts at the M06/6-31G(d) // B3LYP/6-31+G(d,p) level, illustrated on the most likely isomer of **1** [(2*S*,6*R*,7*S*,8*R*)-**1**, isomer 1]. For simplicity only the first 6 conformers were included.

| Carbon | $\delta_{\text{Exp}}$ (ppm) | $\delta_{\text{calc}}$ Conf. A (ppm) | $\delta_{\text{calc}}$ Conf. B (ppm) | $\delta_{\text{calc}}$ Conf. C (ppm) | $\delta_{\text{calc}}$ Conf. D (ppm) | $\delta_{\text{calc}}$ Conf. E (ppm) | $\delta_{\text{calc}}$ Conf. F (ppm) |
|--------|-----------------------------|--------------------------------------|--------------------------------------|--------------------------------------|--------------------------------------|--------------------------------------|--------------------------------------|
| C-1    | 48.60                       | 45.96                                | 45.57                                | 45.43                                | 45.72                                | 46.58                                | 47.41                                |
| C-2    | 69.20                       | 66.08                                | 65.53                                | 66.99                                | 66.62                                | 70.48                                | 70.57                                |
| C-3    | 133.90                      | 136.68                               | 136.74                               | 136.84                               | 136.68                               | 130.33                               | 130.50                               |
| C-4    | 135.10                      | 133.87                               | 134.39                               | 134.40                               | 134.34                               | 140.56                               | 140.67                               |
| C-5    | 44.00                       | 40.06                                | 39.82                                | 39.84                                | 38.92                                | 46.32                                | 46.16                                |
| C-6    | 70.80                       | 77.06                                | 77.01                                | 76.87                                | 77.82                                | 74.67                                | 74.70                                |
| C-7    | 52.90                       | 47.91                                | 47.63                                | 48.13                                | 47.30                                | 49.97                                | 49.75                                |
| C-8    | 75.30                       | 70.12                                | 70.93                                | 70.42                                | 71.05                                | 68.80                                | 69.29                                |
| C-9    | 129.30                      | 131.63                               | 131.67                               | 131.54                               | 131.66                               | 130.70                               | 130.77                               |
| C-10   | 142.70                      | 137.05                               | 137.09                               | 137.50                               | 137.19                               | 137.33                               | 137.40                               |
| C-11   | 136.40                      | 135.43                               | 136.04                               | 135.13                               | 135.55                               | 135.73                               | 135.67                               |
| C-12   | 169.40                      | 166.42                               | 166.64                               | 166.53                               | 166.38                               | 166.55                               | 166.02                               |
| C-13   | 121.20                      | 128.32                               | 127.60                               | 128.28                               | 127.37                               | 128.88                               | 127.46                               |
| C-14   | 18.70                       | 17.52                                | 17.14                                | 17.89                                | 17.17                                | 17.42                                | 17.01                                |
| C-15   | 20.00                       | 21.92                                | 21.72                                | 21.86                                | 21.90                                | 17.34                                | 17.99                                |
| C-1'   | 171.80                      | 171.17                               | 170.11                               | 171.31                               | 170.59                               | 171.18                               | 170.43                               |
| C-2'   | 43.30                       | 39.60                                | 40.36                                | 41.26                                | 43.28                                | 39.80                                | 40.30                                |
| C-3'   | 25.40                       | 23.11                                | 23.53                                | 26.39                                | 24.91                                | 22.76                                | 22.50                                |
| C-4'   | 22.30                       | 20.05                                | 21.41                                | 21.77                                | 20.71                                | 20.03                                | 22.04                                |
| C-5'   | 22.30                       | 22.13                                | 19.80                                | 18.78                                | 23.69                                | 21.74                                | 19.54                                |

**Table S28.** Conformer dependency of the  $^{13}\text{C}$  chemical shifts at the mPW1PW91/6-311+G(2d,p) //  $\omega\text{B97XD}/6\text{-}31\text{+G(d,p)}$  level, illustrated on the most likely isomer of **1** [(2*S*,6*R*,7*S*,8*R*)-**1**, isomer 1]. For simplicity only the first 6 conformers were included.

| Carbon | $\delta_{\text{Exp}}$ (ppm) | $\delta_{\text{calc}}$ Conf. A (ppm) | $\delta_{\text{calc}}$ Conf. B (ppm) | $\delta_{\text{calc}}$ Conf. C (ppm) | $\delta_{\text{calc}}$ Conf. D (ppm) | $\delta_{\text{calc}}$ Conf. E (ppm) | $\delta_{\text{calc}}$ Conf. F (ppm) |
|--------|-----------------------------|--------------------------------------|--------------------------------------|--------------------------------------|--------------------------------------|--------------------------------------|--------------------------------------|
| C-1    | 48.60                       | 46.64                                | 46.82                                | 47.54                                | 46.38                                | 46.52                                | 46.30                                |
| C-2    | 69.20                       | 65.99                                | 66.32                                | 69.48                                | 66.32                                | 66.04                                | 66.07                                |
| C-3    | 133.90                      | 137.14                               | 137.12                               | 128.54                               | 136.91                               | 137.06                               | 137.51                               |
| C-4    | 135.10                      | 133.67                               | 133.82                               | 144.73                               | 134.07                               | 133.87                               | 133.65                               |
| C-5    | 44.00                       | 40.84                                | 41.07                                | 47.05                                | 41.27                                | 41.24                                | 41.43                                |
| C-6    | 70.80                       | 76.20                                | 76.09                                | 73.66                                | 76.25                                | 75.90                                | 76.78                                |
| C-7    | 52.90                       | 49.05                                | 48.98                                | 50.37                                | 49.29                                | 48.89                                | 48.75                                |
| C-8    | 75.30                       | 69.10                                | 69.22                                | 68.03                                | 68.02                                | 68.90                                | 69.04                                |
| C-9    | 129.30                      | 130.62                               | 129.79                               | 128.64                               | 129.87                               | 130.46                               | 129.93                               |
| C-10   | 142.70                      | 140.38                               | 140.64                               | 139.82                               | 140.17                               | 140.15                               | 139.76                               |
| C-11   | 136.40                      | 137.16                               | 136.10                               | 136.68                               | 136.29                               | 136.22                               | 136.43                               |
| C-12   | 169.40                      | 166.13                               | 165.77                               | 165.55                               | 166.34                               | 166.04                               | 165.88                               |
| C-13   | 121.20                      | 127.26                               | 127.30                               | 128.40                               | 128.28                               | 128.55                               | 126.59                               |
| C-14   | 18.70                       | 18.01                                | 17.92                                | 17.25                                | 17.91                                | 17.95                                | 17.96                                |
| C-15   | 20.00                       | 21.94                                | 22.00                                | 18.90                                | 22.51                                | 22.20                                | 22.15                                |
| C-1'   | 171.80                      | 170.43                               | 171.37                               | 170.64                               | 171.86                               | 170.62                               | 171.34                               |
| C-2'   | 43.30                       | 44.38                                | 43.20                                | 44.41                                | 43.34                                | 42.61                                | 42.38                                |
| C-3'   | 25.40                       | 30.51                                | 28.32                                | 29.68                                | 29.33                                | 29.47                                | 26.27                                |
| C-4'   | 22.30                       | 20.26                                | 22.08                                | 20.02                                | 24.33                                | 21.26                                | 20.19                                |
| C-5'   | 22.30                       | 22.98                                | 20.55                                | 22.91                                | 22.75                                | 19.41                                | 21.77                                |

**Table S29.** Conformer dependency of the  $^{13}\text{C}$  chemical shifts at the mPW1PW91/6-311+G(2d,p) SMD/ $\text{CHCl}_3$  //  $\omega\text{B97XD}/6\text{-}31\text{+G(d,p)}$  SMD/ $\text{CHCl}_3$  level, illustrated on the most likely isomer of **1** [(2*S*,6*R*,7*S*,8*R*)-**1**, isomer 1]. For simplicity only the first 6 conformers were included.

| Carbon | $\delta_{\text{Exp}}$ (ppm) | $\delta_{\text{calc}}$ Conf. A (ppm) | $\delta_{\text{calc}}$ Conf. B (ppm) | $\delta_{\text{calc}}$ Conf. C (ppm) | $\delta_{\text{calc}}$ Conf. D (ppm) | $\delta_{\text{calc}}$ Conf. E (ppm) | $\delta_{\text{calc}}$ Conf. F (ppm) |
|--------|-----------------------------|--------------------------------------|--------------------------------------|--------------------------------------|--------------------------------------|--------------------------------------|--------------------------------------|
| C-1    | 48.60                       | 46.46                                | 46.27                                | 46.55                                | 46.33                                | 46.16                                | 46.16                                |
| C-2    | 69.20                       | 65.98                                | 66.32                                | 66.16                                | 65.99                                | 66.08                                | 66.02                                |
| C-3    | 133.90                      | 135.04                               | 135.08                               | 135.18                               | 135.04                               | 134.88                               | 135.60                               |
| C-4    | 135.10                      | 133.59                               | 133.77                               | 133.88                               | 133.73                               | 133.77                               | 133.84                               |
| C-5    | 44.00                       | 40.56                                | 40.57                                | 40.74                                | 40.50                                | 40.25                                | 40.84                                |
| C-6    | 70.80                       | 77.50                                | 77.53                                | 77.77                                | 77.73                                | 77.86                                | 78.33                                |
| C-7    | 52.90                       | 48.97                                | 49.14                                | 49.00                                | 48.75                                | 48.09                                | 48.67                                |
| C-8    | 75.30                       | 71.52                                | 71.29                                | 70.80                                | 70.53                                | 74.08                                | 70.39                                |
| C-9    | 129.30                      | 127.91                               | 127.43                               | 126.96                               | 127.52                               | 128.97                               | 127.65                               |
| C-10   | 142.70                      | 141.71                               | 141.69                               | 141.68                               | 141.40                               | 141.63                               | 140.54                               |
| C-11   | 136.40                      | 136.83                               | 136.16                               | 135.01                               | 136.07                               | 137.25                               | 136.03                               |
| C-12   | 169.40                      | 167.30                               | 167.20                               | 167.17                               | 167.38                               | 167.38                               | 167.39                               |
| C-13   | 121.20                      | 126.67                               | 126.79                               | 126.30                               | 125.78                               | 123.77                               | 127.05                               |
| C-14   | 18.70                       | 18.13                                | 18.23                                | 18.11                                | 18.12                                | 18.23                                | 18.13                                |
| C-15   | 20.00                       | 21.79                                | 21.85                                | 21.85                                | 21.99                                | 21.96                                | 21.98                                |
| C-1'   | 171.80                      | 171.08                               | 171.71                               | 171.22                               | 170.95                               | 171.29                               | 171.49                               |
| C-2'   | 43.30                       | 44.78                                | 43.66                                | 42.72                                | 44.32                                | 44.02                                | 42.69                                |
| C-3'   | 25.40                       | 30.78                                | 29.43                                | 27.69                                | 30.19                                | 29.31                                | 26.87                                |
| C-4'   | 22.30                       | 20.50                                | 22.14                                | 21.75                                | 22.05                                | 21.90                                | 20.07                                |
| C-5'   | 22.30                       | 22.53                                | 20.50                                | 20.11                                | 19.94                                | 20.22                                | 21.68                                |

**Table S30.** Cartesian coordinates and energies of the low-energy conformers calculated at the B3LYP/6-31G(d) level.

|                                    |           |           |           |                                    |           |           |           |
|------------------------------------|-----------|-----------|-----------|------------------------------------|-----------|-----------|-----------|
| (1R,5S,6S,7S,10R)-2, Conf. A       |           |           |           | C                                  | 1.053843  | -0.794725 | 0.172444  |
| C                                  | 3.472530  | 0.017669  | -0.242346 | C                                  | 2.439171  | -1.090011 | -0.482993 |
| C                                  | 2.942188  | 1.404164  | -0.660815 | C                                  | -0.894148 | 0.927508  | -0.032604 |
| C                                  | 1.586107  | 1.670814  | -0.045274 | C                                  | -1.860464 | -0.192958 | -0.460650 |
| C                                  | 0.569591  | 0.587712  | -0.380103 | C                                  | -1.405267 | -1.549582 | 0.107469  |
| C                                  | 1.060017  | -0.787333 | 0.190201  | C                                  | 0.044742  | -1.875651 | -0.275486 |
| C                                  | 2.438006  | -1.083289 | -0.481842 | C                                  | -3.345407 | 0.163201  | -0.167191 |
| C                                  | -0.893396 | 0.928380  | -0.031987 | C                                  | -4.309130 | -0.779071 | -0.907057 |
| C                                  | -1.857047 | -0.195733 | -0.455209 | C                                  | -3.696979 | 0.222541  | 1.328833  |
| C                                  | -1.406687 | -1.542158 | 0.137765  | O                                  | -1.308787 | 2.109142  | -0.723502 |
| C                                  | 0.045695  | -1.876773 | -0.231440 | C                                  | 1.371128  | 2.708333  | 0.781015  |
| C                                  | -3.344637 | 0.161691  | -0.178109 | O                                  | 2.970147  | -2.359565 | -0.103137 |
| C                                  | -4.301665 | -0.791231 | -0.913032 | H                                  | 0.584677  | 0.493798  | -1.481264 |
| C                                  | -3.707560 | 0.241514  | 1.314146  | C                                  | 1.177178  | -0.791294 | 1.710659  |
| O                                  | -1.310047 | 2.104836  | -0.730084 | H                                  | 3.758575  | 0.049639  | 0.800710  |
| C                                  | 1.366406  | 2.723577  | 0.753381  | H                                  | 4.377963  | -0.217629 | -0.825875 |
| O                                  | 3.028166  | -2.300324 | -0.026548 | H                                  | 3.652985  | 2.195124  | -0.391366 |
| H                                  | 0.582876  | 0.483660  | -1.478969 | H                                  | 2.834594  | 1.444416  | -1.763376 |
| C                                  | 1.211624  | -0.773571 | 1.724540  | H                                  | 2.267203  | -1.187914 | -1.563326 |
| H                                  | 3.745857  | 0.024840  | 0.819023  | H                                  | -0.979719 | 1.085065  | 1.054726  |
| H                                  | 4.382993  | -0.228165 | -0.800519 | H                                  | -1.770234 | -0.247988 | -1.557284 |
| H                                  | 3.658611  | 2.184094  | -0.380186 | H                                  | -2.059251 | -2.344719 | -0.269401 |
| H                                  | 2.851237  | 1.432402  | -1.757525 | H                                  | -1.518326 | -1.560045 | 1.198908  |
| H                                  | 2.255295  | -1.150345 | -1.569810 | H                                  | 0.104225  | -1.975954 | -1.369416 |
| H                                  | -0.978698 | 1.090184  | 1.054784  | H                                  | 0.347030  | -2.844726 | 0.136867  |
| H                                  | -1.758167 | -0.265660 | -1.550338 | H                                  | -3.493716 | 1.168527  | -0.578048 |
| H                                  | -2.059475 | -2.344534 | -0.225468 | H                                  | -4.266810 | -1.802906 | -0.515379 |
| H                                  | -1.520055 | -1.530849 | 1.228650  | H                                  | -5.344475 | -0.434027 | -0.799836 |
| H                                  | 0.105781  | -2.014825 | -1.322310 | H                                  | -4.082280 | -0.821230 | -1.979429 |
| H                                  | 0.323259  | -2.836921 | 0.226304  | H                                  | -4.731058 | 0.562765  | 1.460369  |
| H                                  | -3.489978 | 1.161108  | -0.603909 | H                                  | -3.054250 | 0.920307  | 1.877509  |
| H                                  | -4.261779 | -1.810058 | -0.507992 | H                                  | -3.616040 | -0.760162 | 1.809886  |
| H                                  | -5.338063 | -0.446054 | -0.817772 | H                                  | -0.607288 | 2.770463  | -0.612654 |
| H                                  | -4.067177 | -0.846678 | -1.983197 | H                                  | 0.422235  | 2.881742  | 1.282232  |
| H                                  | -4.742414 | 0.583910  | 1.432846  | H                                  | 2.159538  | 3.426113  | 0.995052  |
| H                                  | -3.068443 | 0.946331  | 1.857698  | H                                  | 3.294379  | -2.280697 | 0.807844  |
| H                                  | -3.631190 | -0.734451 | 1.809572  | H                                  | 1.850047  | -0.008568 | 2.072703  |
| H                                  | -0.603786 | 2.763476  | -0.634209 | H                                  | 0.211092  | -0.628431 | 2.196168  |
| H                                  | 0.414662  | 2.905684  | 1.246061  | H                                  | 1.548454  | -1.761142 | 2.063275  |
| H                                  | 2.154634  | 3.442895  | 0.962539  | B3LYP energy = -737.679638075 a.u. |           |           |           |
| H                                  | 2.451750  | -3.029593 | -0.301746 | (1R,5S,6S,7S,10R)-2, Conf. C       |           |           |           |
| H                                  | 1.718479  | -1.687299 | 2.049944  | C                                  | 3.467192  | 0.024608  | -0.234428 |
| H                                  | 1.799177  | 0.081007  | 2.070220  | C                                  | 2.940498  | 1.410593  | -0.661072 |
| H                                  | 0.242640  | -0.722855 | 2.230103  | C                                  | 1.584649  | 1.671424  | -0.042888 |
| B3LYP energy = -737.679988196 a.u. |           |           |           | C                                  | 0.570628  | 0.587972  | -0.383369 |
| (1R,5S,6S,7S,10R)-2, Conf. B       |           |           |           | C                                  | 1.055297  | -0.793036 | 0.180401  |
| C                                  | 3.471139  | 0.025713  | -0.260205 | C                                  | 2.432272  | -1.084199 | -0.475414 |
| C                                  | 2.935777  | 1.414311  | -0.667956 | C                                  | -0.892918 | 0.925975  | -0.033505 |
| C                                  | 1.585193  | 1.669399  | -0.037006 | C                                  | -1.858301 | -0.195513 | -0.460356 |
| C                                  | 0.569818  | 0.589215  | -0.382021 | C                                  | -1.404498 | -1.549161 | 0.114662  |

|   |           |           |           |
|---|-----------|-----------|-----------|
| C | 0.046673  | -1.879167 | -0.260720 |
| C | -3.343989 | 0.161714  | -0.171905 |
| C | -4.306006 | -0.784255 | -0.909349 |
| C | -3.698950 | 0.228314  | 1.322993  |
| O | -1.308878 | 2.106215  | -0.726993 |
| C | 1.366779  | 2.718698  | 0.763351  |
| O | 2.899268  | -2.340724 | 0.017431  |
| H | 0.584226  | 0.489024  | -1.482321 |
| C | 1.187828  | -0.784539 | 1.718166  |
| H | 3.735504  | 0.036211  | 0.828089  |
| H | 4.386430  | -0.210001 | -0.790552 |
| H | 3.656293  | 2.192138  | -0.383200 |
| H | 2.848759  | 1.433873  | -1.757734 |
| H | 2.258234  | -1.160049 | -1.564092 |
| H | -0.977677 | 1.084783  | 1.053531  |
| H | -1.765488 | -0.254251 | -1.556687 |
| H | -2.057227 | -2.346389 | -0.260153 |
| H | -1.520300 | -1.553983 | 1.205605  |
| H | 0.109349  | -1.991748 | -1.353577 |
| H | 0.345180  | -2.842305 | 0.166877  |
| H | -3.491735 | 1.164987  | -0.587953 |
| H | -4.264398 | -1.806163 | -0.512623 |
| H | -5.341690 | -0.438867 | -0.806147 |
| H | -4.076740 | -0.831599 | -1.981048 |
| H | -4.733458 | 0.568904  | 1.450548  |
| H | -3.057396 | 0.928812  | 1.869418  |
| H | -3.618583 | -0.751885 | 1.809143  |
| H | -0.605515 | 2.766442  | -0.622285 |
| H | 0.415947  | 2.896498  | 1.259191  |
| H | 2.154755  | 3.437531  | 0.975405  |
| H | 3.746313  | -2.529349 | -0.415165 |
| H | 1.809868  | 0.042030  | 2.072703  |
| H | 0.214002  | -0.682937 | 2.206018  |
| H | 1.639301  | -1.722205 | 2.054106  |

B3LYP energy = -737.679373197 a.u.

(1R,5S,6S,7S,10R)-2, Conf. D

|   |           |           |           |
|---|-----------|-----------|-----------|
| C | 3.421318  | 0.429837  | -0.263698 |
| C | 2.672649  | 1.733261  | -0.608736 |
| C | 1.305456  | 1.752310  | 0.039300  |
| C | 0.462714  | 0.542963  | -0.343871 |
| C | 1.173328  | -0.764849 | 0.149461  |
| C | 2.568511  | -0.807263 | -0.549240 |
| C | -1.029052 | 0.632290  | 0.039475  |
| C | -1.818761 | -0.599827 | -0.438328 |
| C | -1.145497 | -1.888944 | 0.069974  |
| C | 0.335137  | -1.976251 | -0.321591 |
| C | -3.338486 | -0.583265 | -0.083840 |
| C | -3.635702 | -0.099422 | 1.345174  |
| C | -4.184098 | 0.196730  | -1.104136 |
| O | -1.627465 | 1.780791  | -0.568232 |
| C | 0.947750  | 2.708392  | 0.906898  |
| O | 3.349291  | -1.937158 | -0.161831 |
| H | 0.473162  | 0.498546  | -1.446777 |
| C | 1.345671  | -0.807651 | 1.681286  |
| H | 3.705592  | 0.430297  | 0.794823  |

|   |           |           |           |
|---|-----------|-----------|-----------|
| H | 4.350357  | 0.357851  | -0.840381 |
| H | 3.263850  | 2.602324  | -0.299676 |
| H | 2.555618  | 1.796808  | -1.701421 |
| H | 2.379817  | -0.848809 | -1.637352 |
| H | -1.114367 | 0.705801  | 1.135013  |
| H | -1.742621 | -0.601606 | -1.536883 |
| H | -1.677919 | -2.755041 | -0.343058 |
| H | -1.252333 | -1.962883 | 1.160212  |
| H | 0.401419  | -2.048310 | -1.418548 |
| H | 0.763224  | -2.903910 | 0.084254  |
| H | -3.663337 | -1.633794 | -0.141701 |
| H | -3.049384 | -0.639658 | 2.098667  |
| H | -3.423480 | 0.970396  | 1.449564  |
| H | -4.694747 | -0.251569 | 1.584493  |
| H | -3.918301 | 1.256470  | -1.106471 |
| H | -5.251852 | 0.103807  | -0.868494 |
| H | -4.033120 | -0.190927 | -2.119264 |
| H | -1.020521 | 2.526817  | -0.435838 |
| H | -0.005977 | 2.709168  | 1.428530  |
| H | 1.621471  | 3.527546  | 1.146489  |
| H | 2.891651  | -2.733539 | -0.471776 |
| H | 2.004542  | -1.638854 | 1.950558  |
| H | 1.786479  | 0.113573  | 2.071277  |
| H | 0.390543  | -0.949438 | 2.195499  |

B3LYP energy = -737.678973266 a.u.

(1R,5S,6S,7S,10R)-2, Conf. E

|   |           |           |           |
|---|-----------|-----------|-----------|
| C | 3.418671  | 0.435656  | -0.281763 |
| C | 2.666124  | 1.740947  | -0.614133 |
| C | 1.305855  | 1.749668  | 0.047710  |
| C | 0.463219  | 0.544176  | -0.345535 |
| C | 1.168274  | -0.772739 | 0.131560  |
| C | 2.570001  | -0.815679 | -0.551647 |
| C | -1.029648 | 0.631417  | 0.037926  |
| C | -1.821953 | -0.597099 | -0.445704 |
| C | -1.144372 | -1.893195 | 0.041826  |
| C | 0.332320  | -1.974035 | -0.362365 |
| C | -3.339279 | -0.582078 | -0.081916 |
| C | -3.627773 | -0.114884 | 1.354545  |
| C | -4.191173 | 0.210419  | -1.087328 |
| O | -1.625688 | 1.785208  | -0.562308 |
| C | 0.955982  | 2.692940  | 0.932357  |
| O | 3.298308  | -2.003347 | -0.240624 |
| H | 0.474303  | 0.508643  | -1.448386 |
| C | 1.317057  | -0.827696 | 1.666394  |
| H | 3.714739  | 0.452970  | 0.776960  |
| H | 4.343276  | 0.365700  | -0.866275 |
| H | 3.258622  | 2.610162  | -0.307598 |
| H | 2.539176  | 1.806578  | -1.705243 |
| H | 2.396389  | -0.886988 | -1.633658 |
| H | -1.116164 | 0.699673  | 1.133709  |
| H | -1.752774 | -0.587351 | -1.544609 |
| H | -1.680083 | -2.752366 | -0.381431 |
| H | -1.248289 | -1.984385 | 1.131646  |
| H | 0.392328  | -2.011943 | -1.460301 |
| H | 0.784801  | -2.903771 | 0.000143  |

|   |           |           |           |
|---|-----------|-----------|-----------|
| H | -3.665135 | -1.631562 | -0.149892 |
| H | -4.685237 | -0.270070 | 1.598950  |
| H | -3.036574 | -0.663925 | 2.097870  |
| H | -3.415453 | 0.953862  | 1.470240  |
| H | -5.257574 | 0.114757  | -0.846413 |
| H | -4.046410 | -0.164970 | -2.107910 |
| H | -3.925451 | 1.270208  | -1.078859 |
| H | -1.023631 | 2.532045  | -0.413523 |
| H | 0.006099  | 2.686166  | 1.460976  |
| H | 1.630425  | 3.510187  | 1.176661  |
| H | 3.618864  | -1.919518 | 0.671226  |
| H | 0.346312  | -0.840567 | 2.169472  |
| H | 1.838697  | -1.745229 | 1.964649  |
| H | 1.867952  | 0.029883  | 2.063480  |

B3LYP energy = -737.678639960 a.u.

(1R,5S,6S,7S,10R)-2, Conf. F

|   |           |           |           |
|---|-----------|-----------|-----------|
| C | 3.414911  | 0.434219  | -0.258363 |
| C | 2.669771  | 1.738670  | -0.609424 |
| C | 1.304533  | 1.751995  | 0.042519  |
| C | 0.463855  | 0.543092  | -0.345727 |
| C | 1.169631  | -0.771295 | 0.140727  |
| C | 2.562093  | -0.810581 | -0.543635 |
| C | -1.028458 | 0.630363  | 0.037987  |
| C | -1.819560 | -0.599412 | -0.443809 |
| C | -1.143342 | -1.893109 | 0.050470  |
| C | 0.335058  | -1.977786 | -0.347101 |
| C | -3.337909 | -0.583224 | -0.083892 |
| C | -3.630267 | -0.108500 | 1.349221  |
| C | -4.187531 | 0.203351  | -1.095842 |
| O | -1.625495 | 1.782232  | -0.566173 |
| C | 0.950472  | 2.702598  | 0.917515  |
| O | 3.229220  | -2.000391 | -0.119877 |
| H | 0.473945  | 0.503574  | -1.448436 |
| C | 1.326969  | -0.821254 | 1.675198  |
| H | 3.696215  | 0.437978  | 0.800849  |
| H | 4.349441  | 0.374459  | -0.834783 |
| H | 3.260937  | 2.608718  | -0.302950 |
| H | 2.551286  | 1.798407  | -1.702054 |
| H | 2.381450  | -0.860500 | -1.632580 |
| H | -1.114532 | 0.701268  | 1.133451  |
| H | -1.747684 | -0.593079 | -1.542650 |
| H | -1.677648 | -2.754256 | -0.370782 |
| H | -1.250312 | -1.979377 | 1.140139  |
| H | 0.399599  | -2.026570 | -1.444647 |
| H | 0.783312  | -2.903203 | 0.030230  |
| H | -3.663205 | -1.633221 | -0.146976 |
| H | -4.688418 | -0.262457 | 1.591652  |
| H | -3.040764 | -0.653529 | 2.096700  |
| H | -3.418140 | 0.960810  | 1.459853  |
| H | -5.254592 | 0.109042  | -0.857076 |
| H | -4.040175 | -0.177846 | -2.113944 |
| H | -3.921826 | 1.263172  | -1.092644 |
| H | -1.022438 | 2.529204  | -0.422599 |
| H | -0.001103 | 2.699065  | 1.442941  |
| H | 1.624319  | 3.521040  | 1.159419  |

|   |          |           |           |
|---|----------|-----------|-----------|
| H | 4.086821 | -2.032541 | -0.571136 |
| H | 0.358351 | -0.899497 | 2.177293  |
| H | 1.925200 | -1.692766 | 1.955235  |
| H | 1.818801 | 0.072609  | 2.068816  |

B3LYP energy = -737.678381843 a.u.

(1R,5S,6S,7S,10R)-2, Conf. G

|   |           |           |           |
|---|-----------|-----------|-----------|
| C | 3.485647  | -0.013122 | -0.188568 |
| C | 2.982295  | 1.374511  | -0.622029 |
| C | 1.609206  | 1.684229  | -0.060578 |
| C | 0.577578  | 0.609516  | -0.384317 |
| C | 1.054454  | -0.780463 | 0.173709  |
| C | 2.441959  | -1.090691 | -0.471059 |
| C | -0.884351 | 0.933172  | -0.000667 |
| C | -1.855571 | -0.183571 | -0.454312 |
| C | -1.407005 | -1.550102 | 0.090750  |
| C | 0.048102  | -1.866191 | -0.275389 |
| C | -3.340363 | 0.163147  | -0.152616 |
| C | -4.305301 | -0.725996 | -0.953721 |
| C | -3.700684 | 0.134254  | 1.342417  |
| O | -1.297027 | 2.198990  | -0.526180 |
| C | 1.382134  | 2.785521  | 0.661876  |
| O | 2.996591  | -2.327416 | -0.022615 |
| H | 0.579004  | 0.497355  | -1.486736 |
| C | 1.180477  | -0.773835 | 1.710857  |
| H | 3.722123  | -0.014102 | 0.881637  |
| H | 4.410521  | -0.271549 | -0.716915 |
| H | 3.699205  | 2.148408  | -0.326407 |
| H | 2.930386  | 1.398544  | -1.722739 |
| H | 2.285140  | -1.136761 | -1.564521 |
| H | -0.953200 | 1.060790  | 1.085230  |
| H | -1.766555 | -0.226592 | -1.554763 |
| H | -2.056402 | -2.341937 | -0.301844 |
| H | -1.527664 | -1.573075 | 1.180246  |
| H | 0.118368  | -1.983512 | -1.368399 |
| H | 0.327691  | -2.833124 | 0.165962  |
| H | -3.476308 | 1.194045  | -0.499901 |
| H | -4.081289 | -0.696165 | -2.027362 |
| H | -4.261508 | -1.774191 | -0.632798 |
| H | -5.340674 | -0.390234 | -0.821278 |
| H | -4.725240 | 0.495332  | 1.490280  |
| H | -3.041909 | 0.774650  | 1.939638  |
| H | -3.651815 | -0.880089 | 1.756934  |
| H | -1.057201 | 2.217884  | -1.466875 |
| H | 0.400773  | 3.047800  | 1.039202  |
| H | 2.188278  | 3.485902  | 0.870604  |
| H | 2.422161  | -3.042101 | -0.336667 |
| H | 1.741574  | 0.094078  | 2.067409  |
| H | 0.203618  | -0.748586 | 2.203113  |
| H | 1.702956  | -1.677632 | 2.039189  |

B3LYP energy = -737.677599469 a.u.

(1R,5S,6S,7S,10R)-2, Conf. H

|   |          |           |           |
|---|----------|-----------|-----------|
| C | 3.484783 | -0.006220 | -0.204953 |
| C | 2.977060 | 1.384433  | -0.626286 |
| C | 1.608451 | 1.683664  | -0.049735 |



|   |           |           |           |
|---|-----------|-----------|-----------|
| C | 0.578160  | 0.612414  | -0.385484 |
| C | 1.048101  | -0.786347 | 0.155780  |
| C | 2.442076  | -1.096271 | -0.473534 |
| C | -0.885388 | 0.934131  | -0.003378 |
| C | -1.858825 | -0.180572 | -0.458397 |
| C | -1.404636 | -1.556847 | 0.060175  |
| C | 0.047939  | -1.863097 | -0.321029 |
| C | -3.340719 | 0.163854  | -0.139229 |
| C | -4.313216 | -0.714190 | -0.943439 |
| C | -3.687460 | 0.113486  | 1.358474  |
| O | -1.294196 | 2.202238  | -0.526797 |
| C | 1.385794  | 2.772113  | 0.693029  |
| O | 2.935448  | -2.385288 | -0.105257 |
| H | 0.583211  | 0.510074  | -1.488366 |
| C | 1.146646  | -0.792022 | 1.695968  |
| H | 3.734107  | 0.006923  | 0.865910  |
| H | 4.406835  | -0.261102 | -0.740678 |
| H | 3.695561  | 2.158179  | -0.333786 |
| H | 2.915388  | 1.411490  | -1.726057 |
| H | 2.294076  | -1.170288 | -1.559763 |
| H | -0.956005 | 1.063380  | 1.082061  |
| H | -1.779582 | -0.209735 | -1.560249 |
| H | -2.055540 | -2.340433 | -0.346305 |
| H | -1.523945 | -1.603290 | 1.149535  |
| H | 0.116660  | -1.939659 | -1.416723 |
| H | 0.354943  | -2.838468 | 0.071765  |
| H | -3.480148 | 1.199644  | -0.470677 |
| H | -5.347480 | -0.380964 | -0.796327 |
| H | -4.099336 | -0.669160 | -2.018593 |
| H | -4.265145 | -1.766709 | -0.637992 |
| H | -3.023493 | 0.745575  | 1.959032  |
| H | -3.633761 | -0.906852 | 1.757007  |
| H | -4.710746 | 0.471869  | 1.521217  |
| H | -1.103783 | 2.199475  | -1.479079 |
| H | 0.406334  | 3.027089  | 1.080349  |
| H | 2.191738  | 3.471033  | 0.907574  |
| H | 3.275841  | -2.319626 | 0.800742  |
| H | 1.550338  | -1.749095 | 2.047505  |
| H | 1.782628  | 0.015024  | 2.070785  |
| H | 0.168683  | -0.671156 | 2.169785  |

B3LYP energy = -737.677535017 a.u.

(1R,5S,6S,7S,10R)-2, Conf. I

|   |          |           |           |
|---|----------|-----------|-----------|
| C | 3.480204 | -0.008381 | -0.175414 |
| C | 2.983166 | 1.379399  | -0.617207 |

|   |           |           |           |
|---|-----------|-----------|-----------|
| C | 1.608874  | 1.685341  | -0.056757 |
| C | 0.579313  | 0.610999  | -0.387529 |
| C | 1.048935  | -0.785674 | 0.162018  |
| C | 2.435499  | -1.090719 | -0.465320 |
| C | -0.883252 | 0.932260  | -0.002528 |
| C | -1.856728 | -0.181690 | -0.458717 |
| C | -1.404317 | -1.556952 | 0.062737  |
| C | 0.049404  | -1.866631 | -0.311405 |
| C | -3.339027 | 0.163626  | -0.142242 |
| C | -4.310557 | -0.715453 | -0.946519 |
| C | -3.688072 | 0.115759  | 1.355000  |
| O | -1.293755 | 2.200688  | -0.524942 |
| C | 1.382616  | 2.783669  | 0.670275  |
| O | 2.862208  | -2.368919 | 0.010052  |
| H | 0.581733  | 0.505575  | -1.490147 |
| C | 1.153844  | -0.787620 | 1.702354  |
| H | 3.708575  | -0.006419 | 0.896497  |
| H | 4.415397  | -0.255443 | -0.699329 |
| H | 3.699810  | 2.153909  | -0.322519 |
| H | 2.933142  | 1.398670  | -1.717981 |
| H | 2.288565  | -1.140267 | -1.560106 |
| H | -0.951613 | 1.059584  | 1.083189  |
| H | -1.775759 | -0.211403 | -1.560520 |
| H | -2.054116 | -2.341279 | -0.344271 |
| H | -1.526646 | -1.600939 | 1.151608  |
| H | 0.122184  | -1.952366 | -1.406403 |
| H | 0.351647  | -2.837799 | 0.094145  |
| H | -3.477839 | 1.198896  | -0.475534 |
| H | -4.095196 | -0.671994 | -2.021491 |
| H | -4.262932 | -1.767528 | -0.639473 |
| H | -5.345043 | -0.381964 | -0.801305 |
| H | -4.711379 | 0.475160  | 1.515666  |
| H | -3.024298 | 0.748065  | 1.955434  |
| H | -3.635547 | -0.903927 | 1.755272  |
| H | -1.098257 | 2.200628  | -1.476165 |
| H | 0.401072  | 3.044803  | 1.047692  |
| H | 2.188777  | 3.483103  | 0.882464  |
| H | 3.739027  | -2.541863 | -0.366103 |
| H | 1.742652  | 0.057160  | 2.070809  |
| H | 0.170271  | -0.720743 | 2.176299  |
| H | 1.628737  | -1.713373 | 2.038923  |

B3LYP energy = -737.677297250 a.u.

**Table S31.** Cartesian coordinates and energies of the low-energy conformers calculated at the B3LYP/6-31+G(d,p) *in vacuo* level.

|                                                              |           |           |           |                                                              |           |           |           |
|--------------------------------------------------------------|-----------|-----------|-----------|--------------------------------------------------------------|-----------|-----------|-----------|
| (2 <i>S</i> ,6 <i>R</i> ,7 <i>S</i> ,8 <i>R</i> )-1, Conf. A |           |           |           | H                                                            | 6.408177  | 0.279973  | -0.950740 |
| C                                                            | -3.935987 | -1.724823 | -0.476646 | H                                                            | 5.979230  | -0.925899 | -2.175962 |
| C                                                            | -3.413579 | -0.419720 | -1.013984 | B3LYP energy = -1155.15771223 a.u.                           |           |           |           |
| C                                                            | -3.402810 | 0.779099  | -0.404271 | (2 <i>S</i> ,6 <i>R</i> ,7 <i>S</i> ,8 <i>R</i> )-1, Conf. B |           |           |           |
| C                                                            | -4.180571 | 1.122314  | 0.844962  | C                                                            | -4.165774 | -1.393181 | -0.438742 |
| C                                                            | -1.698111 | -1.975043 | 0.703200  | C                                                            | -3.507444 | -0.149376 | -0.972358 |
| C                                                            | -2.746581 | -2.676002 | -0.137067 | C                                                            | -3.344000 | 1.031116  | -0.348967 |
| C                                                            | -0.995375 | 1.514677  | -0.853179 | C                                                            | -4.048248 | 1.444153  | 0.922644  |
| C                                                            | -0.455115 | 1.117728  | 0.557584  | C                                                            | -1.940518 | -1.935800 | 0.664004  |
| C                                                            | 0.218364  | -0.287516 | 0.625437  | C                                                            | -3.090119 | -2.487095 | -0.155642 |
| C                                                            | -0.684325 | -1.356416 | 0.075929  | C                                                            | -0.876393 | 1.491761  | -0.843310 |
| O                                                            | -0.226527 | 2.670883  | -1.280109 | C                                                            | -0.362506 | 0.994929  | 0.545679  |
| C                                                            | 0.605099  | 3.134250  | -0.306823 | C                                                            | 0.152954  | -0.475564 | 0.557872  |
| C                                                            | 0.481949  | 2.252969  | 0.892972  | C                                                            | -0.882954 | -1.420795 | 0.015822  |
| O                                                            | 1.302826  | 4.109698  | -0.458236 | O                                                            | 0.013949  | 2.563973  | -1.252883 |
| C                                                            | 1.136154  | 2.510414  | 2.028395  | C                                                            | 0.906045  | 2.903217  | -0.281596 |
| C                                                            | -2.493048 | 1.887861  | -0.924382 | C                                                            | 0.697286  | 2.010576  | 0.897634  |
| C                                                            | -1.971970 | -1.879544 | 2.183535  | O                                                            | 1.707996  | 3.796960  | -0.419625 |
| O                                                            | -4.728879 | -2.439172 | -1.436485 | C                                                            | 1.380944  | 2.168789  | 2.033774  |
| O                                                            | 1.420067  | -0.243680 | -0.187413 | C                                                            | -2.322937 | 2.035367  | -0.875814 |
| C                                                            | 2.603891  | -0.580064 | 0.394117  | C                                                            | -2.153195 | -1.848782 | 2.154804  |
| O                                                            | 2.705968  | -0.935554 | 1.550184  | O                                                            | -5.070133 | -1.987814 | -1.381593 |
| C                                                            | 3.748912  | -0.405379 | -0.581134 | O                                                            | 1.325750  | -0.534589 | -0.294226 |
| C                                                            | 4.996882  | -1.240933 | -0.248302 | C                                                            | 2.441499  | -1.145989 | 0.190541  |
| C                                                            | 4.732406  | -2.743808 | -0.427393 | O                                                            | 2.517627  | -1.610743 | 1.308967  |
| C                                                            | 6.184177  | -0.781350 | -1.107550 | C                                                            | 3.526414  | -1.189823 | -0.864955 |
| H                                                            | -4.527641 | -1.561870 | 0.433062  | C                                                            | 4.945682  | -1.404111 | -0.312343 |
| H                                                            | -2.845197 | -0.531838 | -1.938852 | C                                                            | 5.914971  | -1.720620 | -1.461517 |
| H                                                            | -4.846324 | 0.322737  | 1.175166  | C                                                            | 5.426107  | -0.189931 | 0.497176  |
| H                                                            | -4.793646 | 2.014255  | 0.662184  | H                                                            | -4.702737 | -1.178972 | 0.493865  |
| H                                                            | -2.318388 | -3.000809 | -1.091352 | H                                                            | -2.978731 | -0.311674 | -1.912987 |
| H                                                            | -3.153600 | -3.563407 | 0.361042  | H                                                            | -3.338459 | 1.616716  | 1.742318  |
| H                                                            | -3.515102 | 1.377365  | 1.680230  | H                                                            | -4.789656 | 0.719600  | 1.264783  |
| H                                                            | -1.282009 | 1.079325  | 1.273166  | H                                                            | -2.732452 | -2.839482 | -1.129051 |
| H                                                            | 0.516974  | -0.479241 | 1.658057  | H                                                            | -3.586460 | -3.330384 | 0.338147  |
| H                                                            | -0.579496 | -1.507101 | -0.996699 | H                                                            | -4.563888 | 2.399843  | 0.762100  |
| H                                                            | 1.055626  | 1.871880  | 2.903054  | H                                                            | -1.177070 | 1.022723  | 1.275279  |
| H                                                            | 1.783996  | 3.379943  | 2.090696  | H                                                            | 0.461776  | -0.728257 | 1.574324  |
| H                                                            | -2.644969 | 2.805315  | -0.344100 | H                                                            | -0.832264 | -1.551221 | -1.063421 |
| H                                                            | -0.779046 | 0.734045  | -1.584163 | H                                                            | 1.232343  | 1.524202  | 2.895126  |
| H                                                            | -2.722775 | 2.136280  | -1.966906 | H                                                            | 2.121065  | 2.959836  | 2.111410  |
| H                                                            | -2.136255 | -2.880252 | 2.601352  | H                                                            | -2.355868 | 2.955087  | -0.280380 |
| H                                                            | -2.885232 | -1.304151 | 2.385403  | H                                                            | -0.761209 | 0.713656  | -1.599832 |
| H                                                            | -1.153167 | -1.416583 | 2.739492  | H                                                            | -2.544634 | 2.325243  | -1.909356 |
| H                                                            | -5.449723 | -1.864388 | -1.726784 | H                                                            | -2.424959 | -2.833164 | 2.554770  |
| H                                                            | 3.386870  | -0.616798 | -1.593861 | H                                                            | -2.982487 | -1.172485 | 2.402112  |
| H                                                            | 3.995788  | 0.665714  | -0.565882 | H                                                            | -1.266390 | -1.504530 | 2.692404  |
| H                                                            | 5.239966  | -1.061451 | 0.806252  | H                                                            | -5.724624 | -1.324426 | -1.637946 |
| H                                                            | 5.621132  | -3.328661 | -0.166117 | H                                                            | 3.255537  | -2.013458 | -1.541071 |
| H                                                            | 3.911268  | -3.086048 | 0.210031  | H                                                            | 3.468092  | -0.275096 | -1.466426 |
| H                                                            | 4.477847  | -2.974560 | -1.470037 | H                                                            | 4.909384  | -2.269702 | 0.360789  |
| H                                                            | 7.085885  | -1.353458 | -0.863658 |                                                              |           |           |           |

|   |          |           |           |
|---|----------|-----------|-----------|
| H | 6.926330 | -1.897705 | -1.080021 |
| H | 5.605577 | -2.614085 | -2.016259 |
| H | 5.970609 | -0.886854 | -2.172743 |
| H | 6.429871 | -0.365303 | 0.899508  |
| H | 4.761242 | 0.016488  | 1.341129  |
| H | 5.471660 | 0.708079  | -0.131924 |

B3LYP energy = -1155.15760025 a.u.

(2S,6R,7S,8R)-1, Conf. C

|   |           |           |           |
|---|-----------|-----------|-----------|
| C | -3.725681 | -1.739254 | -0.456201 |
| C | -3.158424 | -0.503260 | -1.100140 |
| C | -3.198544 | 0.760098  | -0.640491 |
| C | -4.079918 | 1.243954  | 0.487440  |
| C | -1.606774 | -1.822997 | 0.950319  |
| C | -2.572001 | -2.628475 | 0.103341  |
| C | -0.761755 | 1.466682  | -0.955122 |
| C | -0.354664 | 1.258044  | 0.538427  |
| C | 0.299038  | -0.123050 | 0.850486  |
| C | -0.548215 | -1.257310 | 0.347247  |
| O | 0.041870  | 2.569217  | -1.453255 |
| C | 0.786672  | 3.156863  | -0.476208 |
| C | 0.555274  | 2.432085  | 0.809027  |
| O | 1.497953  | 4.111030  | -0.687727 |
| C | 1.108634  | 2.835171  | 1.955639  |
| C | -2.247003 | 1.806603  | -1.212323 |
| C | -2.004408 | -1.583963 | 2.385511  |
| O | -4.427094 | -2.574796 | -1.389203 |
| O | 1.581287  | -0.170999 | 0.172520  |
| C | 2.690768  | -0.443506 | 0.914446  |
| O | 2.663660  | -0.638741 | 2.112550  |
| C | 3.930263  | -0.464359 | 0.049206  |
| C | 3.960771  | -1.615949 | -0.985926 |
| C | 5.203625  | -1.479777 | -1.877503 |
| C | 3.912554  | -2.993336 | -0.307887 |
| H | -4.398477 | -1.473834 | 0.369011  |
| H | -2.514397 | -0.719225 | -1.954434 |
| H | -3.488788 | 1.608033  | 1.338028  |
| H | -4.769621 | 0.482860  | 0.857222  |
| H | -2.055515 | -3.057421 | -0.762001 |
| H | -3.023128 | -3.456526 | 0.661873  |
| H | -4.677353 | 2.098951  | 0.145366  |
| H | -1.243453 | 1.308389  | 1.174453  |
| H | 0.485035  | -0.183100 | 1.924562  |
| H | -0.353381 | -1.519926 | -0.690809 |
| H | 0.949632  | 2.311399  | 2.893415  |
| H | 1.753074  | 3.709379  | 1.963543  |
| H | -2.454514 | 2.788859  | -0.772331 |
| H | -0.477109 | 0.602736  | -1.557776 |
| H | -2.378464 | 1.915349  | -2.295012 |
| H | -2.949097 | -1.028327 | 2.453829  |
| H | -1.249046 | -1.034635 | 2.952375  |
| H | -2.171304 | -2.542268 | 2.892513  |
| H | -5.122798 | -2.049812 | -1.807094 |
| H | 3.988841  | 0.494821  | -0.478699 |
| H | 4.789247  | -0.538208 | 0.722793  |
| H | 3.071928  | -1.511733 | -1.621412 |

|   |          |           |           |
|---|----------|-----------|-----------|
| H | 5.223967 | -2.267659 | -2.638298 |
| H | 5.224253 | -0.513354 | -2.393231 |
| H | 6.123591 | -1.565438 | -1.285819 |
| H | 3.925430 | -3.792751 | -1.056844 |
| H | 3.010424 | -3.121220 | 0.299765  |
| H | 4.778356 | -3.136612 | 0.350203  |

B3LYP energy = -1155.15693640 a.u.

(2S,6R,7S,8R)-1, Conf. D

|   |           |           |           |
|---|-----------|-----------|-----------|
| C | -4.282788 | -0.849439 | -0.577768 |
| C | -3.413046 | 0.299655  | -1.011188 |
| C | -3.071028 | 1.389957  | -0.301888 |
| C | -3.729105 | 1.828530  | 0.985699  |
| C | -2.213150 | -1.821083 | 0.533178  |
| C | -3.410068 | -2.122137 | -0.346172 |
| C | -0.550256 | 1.461909  | -0.717766 |
| C | -0.168935 | 0.802935  | 0.645244  |
| C | 0.097353  | -0.731209 | 0.573085  |
| C | -1.061900 | -1.455859 | -0.054072 |
| O | 0.519935  | 2.390309  | -1.040529 |
| C | 1.424332  | 2.516225  | -0.030895 |
| C | 1.030379  | 1.606255  | 1.086114  |
| O | 2.371220  | 3.265101  | -0.096492 |
| C | 1.690592  | 1.584505  | 2.246715  |
| C | -1.884117 | 2.241929  | -0.741849 |
| C | -2.459904 | -1.792593 | 2.021227  |
| O | -5.240985 | -1.224652 | -1.578320 |
| O | 1.272963  | -0.936636 | -0.251296 |
| C | 2.246005  | -1.768832 | 0.217321  |
| O | 2.185725  | -2.325984 | 1.294317  |
| C | 3.387434  | -1.877349 | -0.767420 |
| C | 4.325823  | -0.641705 | -0.773257 |
| C | 5.020289  | -0.442140 | 0.581545  |
| C | 5.355010  | -0.782895 | -1.904594 |
| H | -4.807379 | -0.608193 | 0.355253  |
| H | -2.895392 | 0.115626  | -1.954203 |
| H | -4.596467 | 1.224641  | 1.259268  |
| H | -4.063816 | 2.869501  | 0.889733  |
| H | -3.084620 | -2.467700 | -1.333153 |
| H | -4.053300 | -2.900555 | 0.079979  |
| H | -3.024968 | 1.812812  | 1.828167  |
| H | -0.991178 | 0.921591  | 1.356909  |
| H | 0.323422  | -1.093586 | 1.578198  |
| H | -0.993871 | -1.530924 | -1.137715 |
| H | 1.407706  | 0.926767  | 3.063418  |
| H | 2.547287  | 2.236253  | 2.391264  |
| H | -1.782333 | 3.115361  | -0.087522 |
| H | -0.546003 | 0.723274  | -1.520674 |
| H | -2.024530 | 2.627695  | -1.758105 |
| H | -1.549642 | -1.624985 | 2.601848  |
| H | -2.893138 | -2.745925 | 2.347671  |
| H | -3.183884 | -1.012973 | 2.293664  |
| H | -5.769466 | -0.447167 | -1.802987 |
| H | 3.956729  | -2.774344 | -0.504826 |
| H | 2.966318  | -2.011487 | -1.769772 |
| H | 3.712295  | 0.243810  | -0.981810 |

|   |          |           |           |
|---|----------|-----------|-----------|
| H | 5.659794 | 0.446498  | 0.555537  |
| H | 4.301531 | -0.312686 | 1.396570  |
| H | 5.650326 | -1.305538 | 0.828749  |
| H | 6.011286 | 0.093075  | -1.941259 |
| H | 4.868294 | -0.878489 | -2.881614 |
| H | 5.986609 | -1.667408 | -1.753568 |

B3LYP energy = -1155.15657770 a.u.

(2*S*,6*R*,7*S*,8*R*)-1, Conf. E

|   |           |           |           |
|---|-----------|-----------|-----------|
| C | -4.127182 | -1.504969 | 0.211513  |
| C | -3.682201 | -0.063552 | 0.041386  |
| C | -3.147906 | 0.542860  | -1.033291 |
| C | -3.100452 | -0.046823 | -2.422662 |
| C | -1.716313 | -1.891284 | 0.954483  |
| C | -2.910008 | -2.489984 | 0.242000  |
| C | -0.910640 | 1.704150  | -0.703383 |
| C | -0.415641 | 1.192672  | 0.687885  |
| C | 0.199291  | -0.235142 | 0.699218  |
| C | -0.792442 | -1.252351 | 0.217445  |
| O | -0.306069 | 3.012891  | -0.898757 |
| C | 0.541239  | 3.359771  | 0.107648  |
| C | 0.540536  | 2.275723  | 1.133221  |
| O | 1.159937  | 4.398413  | 0.106327  |
| C | 1.295772  | 2.348020  | 2.232255  |
| C | -2.438717 | 1.875271  | -0.865146 |
| C | -1.761295 | -1.889024 | 2.462473  |
| O | -4.993220 | -2.005844 | -0.815966 |
| O | 1.349304  | -0.232396 | -0.188427 |
| C | 2.547651  | -0.636484 | 0.313178  |
| O | 2.702807  | -1.020748 | 1.454215  |
| C | 3.639639  | -0.496265 | -0.726574 |
| C | 4.864703  | -1.394368 | -0.483945 |
| C | 4.519741  | -2.880152 | -0.668112 |
| C | 6.018182  | -0.974567 | -1.407169 |
| H | -4.648702 | -1.575294 | 1.177148  |
| H | -3.657150 | 0.491750  | 0.979848  |
| H | -3.631050 | 0.611446  | -3.123487 |
| H | -2.068368 | -0.114074 | -2.791350 |
| H | -2.656953 | -2.704007 | -0.800876 |
| H | -3.241606 | -3.428176 | 0.701473  |
| H | -3.558365 | -1.034506 | -2.470754 |
| H | -1.270621 | 1.149898  | 1.373376  |
| H | 0.554960  | -0.451798 | 1.707879  |
| H | -0.861588 | -1.325173 | -0.865881 |
| H | 1.312923  | 1.561996  | 2.980972  |
| H | 1.930329  | 3.215217  | 2.389872  |
| H | -2.822413 | 2.419569  | 0.005351  |
| H | -0.513835 | 1.075714  | -1.505440 |
| H | -2.595923 | 2.512288  | -1.743405 |
| H | -2.565870 | -1.240810 | 2.838478  |
| H | -0.824917 | -1.556649 | 2.916555  |
| H | -1.975158 | -2.897232 | 2.836509  |
| H | -5.776018 | -1.440132 | -0.857355 |
| H | 3.208409  | -0.671069 | -1.719149 |
| H | 3.937376  | 0.561848  | -0.708021 |
| H | 5.179225  | -1.244705 | 0.556272  |

|   |          |           |           |
|---|----------|-----------|-----------|
| H | 5.393959 | -3.509471 | -0.468644 |
| H | 3.722746 | -3.194815 | 0.012597  |
| H | 4.193515 | -3.081706 | -1.696742 |
| H | 6.905659 | -1.590620 | -1.226433 |
| H | 6.300050 | 0.072723  | -1.249200 |
| H | 5.743576 | -1.091757 | -2.463265 |

B3LYP energy = -1155.15614961 a.u.

(2*S*,6*R*,7*S*,8*R*)-1, Conf. F

|   |           |           |           |
|---|-----------|-----------|-----------|
| C | -4.324611 | -1.174471 | 0.219277  |
| C | -3.722171 | 0.215600  | 0.122524  |
| C | -3.156345 | 0.827453  | -0.932883 |
| C | -3.223655 | 0.330497  | -2.357219 |
| C | -1.953078 | -1.886277 | 0.844663  |
| C | -3.228862 | -2.290409 | 0.136838  |
| C | -0.787137 | 1.697961  | -0.620060 |
| C | -0.307086 | 1.050787  | 0.718743  |
| C | 0.132189  | -0.436726 | 0.624308  |
| C | -0.989081 | -1.295530 | 0.118909  |
| O | -0.040011 | 2.937039  | -0.767549 |
| C | 0.876466  | 3.123805  | 0.220672  |
| C | 0.786251  | 1.986050  | 1.182329  |
| O | 1.609909  | 4.084164  | 0.252418  |
| C | 1.585438  | 1.902951  | 2.248770  |
| C | -2.289677 | 2.054286  | -0.709915 |
| C | -1.946741 | -2.004532 | 2.348256  |
| O | -5.276504 | -1.503415 | -0.801767 |
| O | 1.247681  | -0.506668 | -0.303546 |
| C | 2.355037  | -1.199014 | 0.078020  |
| O | 2.476402  | -1.722522 | 1.166430  |
| C | 3.369234  | -1.248988 | -1.045658 |
| C | 4.812231  | -1.522809 | -0.588627 |
| C | 5.698459  | -1.836868 | -1.803388 |
| C | 5.380854  | -0.347522 | 0.221209  |
| H | -4.818049 | -1.250744 | 1.199133  |
| H | -3.598780 | 0.698322  | 1.092721  |
| H | -3.792850 | -0.594347 | -2.448633 |
| H | -2.218798 | 0.172922  | -2.770856 |
| H | -3.031706 | -2.453926 | -0.927024 |
| H | -3.654662 | -3.216192 | 0.540650  |
| H | -3.698273 | 1.089488  | -2.993323 |
| H | -1.135785 | 1.066725  | 1.436831  |
| H | 0.488608  | -0.758006 | 1.604373  |
| H | -1.106829 | -1.272119 | -0.962546 |
| H | 1.536913  | 1.077172  | 2.952245  |
| H | 2.323300  | 2.679762  | 2.426653  |
| H | -2.578156 | 2.580548  | 0.207217  |
| H | -0.495537 | 1.076149  | -1.470954 |
| H | -2.397960 | 2.762378  | -1.539903 |
| H | -0.970380 | -1.791241 | 2.789224  |
| H | -2.679168 | -1.324403 | 2.806122  |
| H | -2.235202 | -3.018843 | 2.648617  |
| H | -5.989939 | -0.851681 | -0.774546 |
| H | 3.029861  | -2.046961 | -1.721751 |
| H | 3.304426  | -0.317776 | -1.620389 |
| H | 4.788283  | -2.405309 | 0.062622  |

|   |          |           |           |
|---|----------|-----------|-----------|
| H | 6.724937 | -2.055664 | -1.490162 |
| H | 5.326278 | -2.704451 | -2.360457 |
| H | 5.737710 | -0.985689 | -2.494881 |
| H | 6.401583 | -0.564714 | 0.554469  |
| H | 4.777680 | -0.144207 | 1.111153  |
| H | 5.416392 | 0.566573  | -0.385105 |

B3LYP energy = -1155.15608246 a.u.

(2S,6R,7S,8R)-1, Conf. G

|   |           |           |           |
|---|-----------|-----------|-----------|
| C | -3.950508 | -1.711343 | -0.469804 |
| C | -3.417129 | -0.410261 | -1.009755 |
| C | -3.405308 | 0.792020  | -0.409883 |
| C | -4.199478 | 1.146047  | 0.825017  |
| C | -1.698294 | -1.980015 | 0.691104  |
| C | -2.752842 | -2.671781 | -0.148780 |
| C | -0.990767 | 1.508718  | -0.855942 |
| C | -0.456680 | 1.107692  | 0.555659  |
| C | 0.220379  | -0.296245 | 0.621538  |
| C | -0.678544 | -1.366297 | 0.068246  |
| O | -0.210555 | 2.657653  | -1.281845 |
| C | 0.616147  | 3.119303  | -0.303437 |
| C | 0.477989  | 2.242614  | 0.898226  |
| O | 1.321260  | 4.089734  | -0.452548 |
| C | 1.119199  | 2.503122  | 2.040331  |
| C | -2.485068 | 1.893806  | -0.927281 |
| C | -1.980914 | -1.876619 | 2.169409  |
| O | -4.881487 | -2.358228 | -1.344642 |
| O | 1.423943  | -0.247177 | -0.188009 |
| C | 2.606338  | -0.587469 | 0.394813  |
| O | 2.704294  | -0.954255 | 1.547585  |
| C | 3.754752  | -0.401067 | -0.574170 |
| C | 5.004619  | -1.234105 | -0.242371 |
| C | 4.747266  | -2.736654 | -0.434184 |
| C | 6.193860  | -0.763049 | -1.092680 |
| H | -4.521541 | -1.544343 | 0.445656  |
| H | -2.828375 | -0.523143 | -1.924133 |
| H | -4.816870 | 2.030280  | 0.620934  |
| H | -3.546001 | 1.417681  | 1.664721  |
| H | -2.317471 | -2.990646 | -1.104637 |
| H | -3.159342 | -3.563776 | 0.341205  |
| H | -4.866853 | 0.347736  | 1.154227  |
| H | -1.287352 | 1.064893  | 1.266589  |
| H | 0.516782  | -0.489588 | 1.654539  |
| H | -0.566508 | -1.518855 | -1.003588 |
| H | 1.026489  | 1.868311  | 2.916518  |
| H | 1.767938  | 3.371635  | 2.107228  |
| H | -2.629910 | 2.810522  | -0.344175 |
| H | -0.779359 | 0.726362  | -1.586622 |
| H | -2.713247 | 2.148453  | -1.968731 |
| H | -2.166406 | -2.872881 | 2.588666  |
| H | -2.884096 | -1.283175 | 2.364065  |
| H | -1.157136 | -1.427377 | 2.729105  |
| H | -4.482298 | -2.444321 | -2.221672 |
| H | 3.397841  | -0.606136 | -1.590056 |
| H | 3.997144  | 0.670869  | -0.549978 |
| H | 5.242310  | -1.061893 | 0.814607  |

|   |          |           |           |
|---|----------|-----------|-----------|
| H | 5.637326 | -3.319707 | -0.173470 |
| H | 3.924827 | -3.087226 | 0.197018  |
| H | 4.498458 | -2.960413 | -1.479783 |
| H | 7.096708 | -1.333548 | -0.849292 |
| H | 6.412978 | 0.297842  | -0.926478 |
| H | 5.994222 | -0.899881 | -2.163116 |

B3LYP energy = -1155.15573333 a.u.

(2S,6R,7S,8R)-1, Conf. H

|   |           |           |           |
|---|-----------|-----------|-----------|
| C | -3.953467 | -1.708364 | -0.483154 |
| C | -3.429450 | -0.407545 | -1.019381 |
| C | -3.399549 | 0.783370  | -0.399021 |
| C | -4.166453 | 1.126224  | 0.856742  |
| C | -1.700519 | -1.968075 | 0.698792  |
| C | -2.750531 | -2.659631 | -0.146417 |
| C | -0.993150 | 1.518703  | -0.854742 |
| C | -0.451857 | 1.122028  | 0.555647  |
| C | 0.218841  | -0.284178 | 0.624354  |
| C | -0.685274 | -1.350580 | 0.072816  |
| O | -0.222839 | 2.674499  | -1.282275 |
| C | 0.611142  | 3.135858  | -0.310963 |
| C | 0.487938  | 2.255270  | 0.889648  |
| O | 1.311671  | 4.109370  | -0.462997 |
| C | 1.143265  | 2.512351  | 2.024469  |
| C | -2.490580 | 1.890662  | -0.924144 |
| C | -1.977854 | -1.873294 | 2.178455  |
| O | -4.785332 | -2.306306 | -1.485424 |
| O | 1.422004  | -0.243196 | -0.186249 |
| C | 2.602701  | -0.589374 | 0.395619  |
| O | 2.699959  | -0.955544 | 1.548833  |
| C | 3.751047  | -0.410740 | -0.574929 |
| C | 4.996344  | -1.250905 | -0.243957 |
| C | 4.729439  | -2.752097 | -0.433343 |
| C | 6.187018  | -0.788238 | -1.096852 |
| H | -4.541145 | -1.542978 | 0.428241  |
| H | -2.881489 | -0.517195 | -1.956093 |
| H | -4.779528 | 2.018735  | 0.677007  |
| H | -3.496710 | 1.379617  | 1.689273  |
| H | -2.320552 | -2.975903 | -1.103034 |
| H | -3.144880 | -3.555120 | 0.354121  |
| H | -4.834488 | 0.328826  | 1.187351  |
| H | -1.278301 | 1.086139  | 1.271759  |
| H | 0.515110  | -0.477635 | 1.657356  |
| H | -0.581305 | -1.498602 | -1.000192 |
| H | 1.061970  | 1.874762  | 2.899784  |
| H | 1.792405  | 3.380985  | 2.085778  |
| H | -2.641484 | 2.809843  | -0.346319 |
| H | -0.777236 | 0.738373  | -1.586242 |
| H | -2.723369 | 2.135205  | -1.966802 |
| H | -2.150780 | -2.872997 | 2.595645  |
| H | -2.885820 | -1.289290 | 2.379021  |
| H | -1.156082 | -1.418175 | 2.736356  |
| H | -5.066392 | -3.180165 | -1.181013 |
| H | 3.391535  | -0.614519 | -1.590138 |
| H | 3.999837  | 0.659757  | -0.552002 |
| H | 5.236803  | -1.078733 | 0.812420  |

|   |          |           |           |
|---|----------|-----------|-----------|
| H | 5.616245 | -3.340361 | -0.173164 |
| H | 3.905745 | -3.096558 | 0.199593  |
| H | 4.477543 | -2.975734 | -1.478202 |
| H | 7.086944 | -1.363586 | -0.853992 |
| H | 6.412556 | 0.271635  | -0.932714 |
| H | 5.984862 | -0.925580 | -2.166736 |

B3LYP energy = -1155.15571433 a.u.

(2S,6R,7S,8R)-1, Conf. I

|   |           |           |           |
|---|-----------|-----------|-----------|
| C | -4.174072 | -1.383817 | -0.431255 |
| C | -3.505895 | -0.145735 | -0.969277 |
| C | -3.345183 | 1.039990  | -0.358001 |
| C | -4.069217 | 1.466645  | 0.896898  |
| C | -1.937971 | -1.942422 | 0.655574  |
| C | -3.091656 | -2.486184 | -0.163124 |
| C | -0.871986 | 1.486242  | -0.846350 |
| C | -0.364977 | 0.986994  | 0.544055  |
| C | 0.155120  | -0.482071 | 0.554904  |
| C | -0.876868 | -1.430254 | 0.010555  |
| O | 0.025895  | 2.553143  | -1.253565 |
| C | 0.911974  | 2.892240  | -0.276650 |
| C | 0.691592  | 2.003381  | 0.903403  |
| O | 1.718125  | 3.782659  | -0.411347 |
| C | 1.364660  | 2.164364  | 2.045449  |
| C | -2.315263 | 2.037288  | -0.881499 |
| C | -2.156953 | -1.849267 | 2.145218  |
| O | -5.202812 | -1.899375 | -1.283938 |
| O | 1.329208  | -0.536278 | -0.295668 |
| C | 2.445335  | -1.147754 | 0.188683  |
| O | 2.519527  | -1.618362 | 1.304690  |
| C | 3.532983  | -1.183419 | -0.864358 |
| C | 4.951412  | -1.397202 | -0.309309 |
| C | 5.924071  | -1.706392 | -1.457642 |
| C | 5.427152  | -0.185636 | 0.506813  |
| H | -4.691958 | -1.166593 | 0.504934  |
| H | -2.953718 | -0.312597 | -1.897829 |
| H | -3.372780 | 1.651939  | 1.725466  |
| H | -4.817364 | 0.746268  | 1.232382  |
| H | -2.725314 | -2.835191 | -1.137210 |
| H | -3.588174 | -3.333111 | 0.323855  |
| H | -4.585111 | 2.418148  | 0.714513  |
| H | -1.184077 | 1.010924  | 1.268807  |
| H | 0.463260  | -0.735224 | 1.571490  |
| H | -0.820484 | -1.562663 | -1.068343 |
| H | 1.207034  | 1.522739  | 2.907415  |
| H | 2.104562  | 2.955131  | 2.127912  |
| H | -2.344102 | 2.955938  | -0.284344 |
| H | -0.757744 | 0.707738  | -1.602691 |
| H | -2.533585 | 2.331908  | -1.914523 |
| H | -2.438841 | -2.829897 | 2.547203  |
| H | -2.980787 | -1.164585 | 2.387499  |
| H | -1.269208 | -1.511025 | 2.684883  |
| H | -4.846695 | -2.010004 | -2.176628 |
| H | 3.265937  | -2.004274 | -1.545409 |
| H | 3.473971  | -0.265680 | -1.461143 |
| H | 4.915324  | -2.265937 | 0.359774  |

|   |          |           |           |
|---|----------|-----------|-----------|
| H | 6.934937 | -1.882816 | -1.074584 |
| H | 5.618121 | -2.598160 | -2.017058 |
| H | 5.979452 | -0.869355 | -2.165034 |
| H | 6.430255 | -0.360659 | 0.910883  |
| H | 4.759718 | 0.015520  | 1.350000  |
| H | 5.472279 | 0.715270  | -0.118124 |

B3LYP energy = -1155.15560372 a.u.

(2S,6R,7S,8R)-1, Conf. J

|   |           |           |           |
|---|-----------|-----------|-----------|
| C | -4.178113 | -1.379925 | -0.444611 |
| C | -3.520051 | -0.140204 | -0.977932 |
| C | -3.341366 | 1.031189  | -0.345516 |
| C | -4.037144 | 1.442049  | 0.931197  |
| C | -1.938884 | -1.928237 | 0.662327  |
| C | -3.087407 | -2.473093 | -0.162145 |
| C | -0.875304 | 1.495762  | -0.844640 |
| C | -0.360030 | 1.001346  | 0.544660  |
| C | 0.155165  | -0.468802 | 0.558412  |
| C | -0.880583 | -1.413399 | 0.015324  |
| O | 0.014883  | 2.568375  | -1.255630 |
| C | 0.908123  | 2.907931  | -0.286388 |
| C | 0.700511  | 2.016814  | 0.894480  |
| O | 1.711164  | 3.800677  | -0.425740 |
| C | 1.384803  | 2.176549  | 2.029978  |
| C | -2.322518 | 2.035611  | -0.876719 |
| C | -2.155946 | -1.840307 | 2.152348  |
| O | -5.106370 | -1.856595 | -1.427045 |
| O | 1.328519  | -0.528740 | -0.292616 |
| C | 2.439314  | -1.151783 | 0.188212  |
| O | 2.509728  | -1.629127 | 1.301793  |
| C | 3.526834  | -1.190216 | -0.864847 |
| C | 4.943764  | -1.414848 | -0.310275 |
| C | 5.915074  | -1.724812 | -1.459535 |
| C | 5.426382  | -0.209653 | 0.511236  |
| H | -4.712464 | -1.163658 | 0.488609  |
| H | -3.009594 | -0.298097 | -1.928760 |
| H | -3.324788 | 1.612039  | 1.749406  |
| H | -4.781082 | 0.719550  | 1.271921  |
| H | -2.725442 | -2.817808 | -1.136998 |
| H | -3.570884 | -3.326300 | 0.334250  |
| H | -4.552431 | 2.398301  | 0.773312  |
| H | -1.174096 | 1.030779  | 1.274638  |
| H | 0.462722  | -0.722212 | 1.575121  |
| H | -0.829920 | -1.542071 | -1.064060 |
| H | 1.236337  | 1.533520  | 2.892560  |
| H | 2.124910  | 2.967756  | 2.106121  |
| H | -2.356330 | 2.957056  | -0.283990 |
| H | -0.759052 | 0.717125  | -1.600511 |
| H | -2.547266 | 2.321374  | -1.910651 |
| H | -2.434413 | -2.822741 | 2.552978  |
| H | -2.980400 | -1.157401 | 2.397281  |
| H | -1.267959 | -1.501961 | 2.691584  |
| H | -5.477199 | -2.697920 | -1.127102 |
| H | 3.254810  | -2.006721 | -1.549128 |
| H | 3.473502  | -0.269894 | -1.458129 |
| H | 4.902303  | -2.286232 | 0.355063  |

|   |          |           |           |
|---|----------|-----------|-----------|
| H | 6.924681 | -1.909105 | -1.076804 |
| H | 5.603914 | -2.612125 | -2.023120 |
| H | 5.975872 | -0.884993 | -2.163160 |
| H | 6.428071 | -0.392519 | 0.915388  |
| H | 4.759467 | -0.007780 | 1.354680  |
| H | 5.477601 | 0.693479  | -0.110003 |

B3LYP energy = -1155.15557900 a.u.

(2*S*,6*R*,7*S*,8*R*)-1, Conf. K

|   |           |           |           |
|---|-----------|-----------|-----------|
| C | -3.985025 | -1.373408 | 0.246017  |
| C | -3.510817 | 0.029274  | -0.089668 |
| C | -2.883836 | 0.474455  | -1.192721 |
| C | -2.734607 | -0.308748 | -2.475302 |
| C | -1.647182 | -1.650454 | 1.234346  |
| C | -2.784920 | -2.343165 | 0.514862  |
| C | -0.661375 | 1.666258  | -0.858582 |
| C | -0.276524 | 1.371043  | 0.626807  |
| C | 0.302471  | -0.044131 | 0.905686  |
| C | -0.663489 | -1.114488 | 0.492711  |
| O | -0.027371 | 2.929238  | -1.203376 |
| C | 0.753640  | 3.419756  | -0.202422 |
| C | 0.670720  | 2.498729  | 0.968516  |
| O | 1.383193  | 4.445613  | -0.314706 |
| C | 1.363869  | 2.722708  | 2.087754  |
| C | -2.170656 | 1.814769  | -1.160774 |
| C | -1.810106 | -1.450698 | 2.720552  |
| O | -4.770668 | -2.015700 | -0.767409 |
| O | 1.526290  | -0.185493 | 0.136594  |
| C | 2.662937  | -0.539171 | 0.797749  |
| O | 2.712749  | -0.717239 | 1.997989  |
| C | 3.824784  | -0.680401 | -0.159525 |
| C | 3.691746  | -1.878177 | -1.132626 |
| C | 4.854031  | -1.862924 | -2.136332 |
| C | 3.623451  | -3.217241 | -0.383340 |
| H | -4.583895 | -1.306218 | 1.165891  |
| H | -3.551034 | 0.710818  | 0.760906  |
| H | -3.200807 | -1.292082 | -2.418800 |
| H | -1.677601 | -0.430710 | -2.746443 |
| H | -2.448318 | -2.699370 | -0.463575 |
| H | -3.163430 | -3.208610 | 1.070636  |
| H | -3.198292 | 0.243548  | -3.303540 |
| H | -1.178324 | 1.445728  | 1.246410  |
| H | 0.562267  | -0.109089 | 1.963493  |
| H | -0.653169 | -1.330935 | -0.573565 |
| H | 1.326647  | 2.053802  | 2.941980  |
| H | 2.004069  | 3.597505  | 2.154200  |
| H | -2.613062 | 2.479993  | -0.410376 |
| H | -0.214917 | 0.922107  | -1.524082 |
| H | -2.250782 | 2.319282  | -2.130822 |
| H | -0.916839 | -1.040500 | 3.197188  |
| H | -2.649961 | -0.777265 | 2.943557  |
| H | -2.041003 | -2.405915 | 3.206913  |
| H | -5.541328 | -1.462101 | -0.952131 |
| H | 3.902579  | 0.246905  | -0.738960 |
| H | 4.729787  | -0.784744 | 0.446270  |
| H | 2.756121  | -1.745934 | -1.691211 |

|   |          |           |           |
|---|----------|-----------|-----------|
| H | 4.760188 | -2.685722 | -2.853503 |
| H | 4.884137 | -0.925385 | -2.702660 |
| H | 5.817419 | -1.977346 | -1.624007 |
| H | 3.519944 | -4.049130 | -1.088505 |
| H | 2.775317 | -3.259069 | 0.308035  |
| H | 4.536072 | -3.384825 | 0.201705  |

B3LYP energy = -1155.15533922 a.u.

(2*S*,6*R*,7*S*,8*R*)-1, Conf. L

|   |           |           |           |
|---|-----------|-----------|-----------|
| C | -4.007674 | -1.643548 | -0.351965 |
| C | -3.495047 | -0.327896 | -0.872558 |
| C | -3.407711 | 0.842552  | -0.216041 |
| C | -4.079915 | 1.149425  | 1.102081  |
| C | -1.691191 | -1.993504 | 0.635241  |
| C | -2.820175 | -2.634639 | -0.146545 |
| C | -1.023799 | 1.546054  | -0.818937 |
| C | -0.387912 | 1.071106  | 0.526257  |
| C | 0.256215  | -0.348102 | 0.476423  |
| C | -0.713399 | -1.372379 | -0.044483 |
| O | -0.260953 | 2.705037  | -1.250125 |
| C | 0.652289  | 3.104354  | -0.322723 |
| C | 0.597582  | 2.170346  | 0.841500  |
| O | 1.360705  | 4.070798  | -0.482353 |
| C | 1.337905  | 2.362361  | 1.936308  |
| C | -2.513270 | 1.953316  | -0.758516 |
| C | -1.844473 | -1.957075 | 2.135520  |
| O | -4.890061 | -2.296865 | -1.276742 |
| O | 1.388977  | -0.288362 | -0.427541 |
| C | 2.604411  | -0.701645 | 0.030900  |
| O | 2.781212  | -1.132242 | 1.151537  |
| C | 3.650256  | -0.516564 | -1.050836 |
| C | 5.025351  | -1.172115 | -0.812204 |
| C | 5.792212  | -0.548206 | 0.365451  |
| C | 4.930129  | -2.701434 | -0.686496 |
| H | -4.523568 | -1.507607 | 0.606878  |
| H | -3.003078 | -0.411074 | -1.842974 |
| H | -4.736527 | 0.350527  | 1.451789  |
| H | -4.685031 | 2.059773  | 1.001815  |
| H | -2.476810 | -2.928200 | -1.144250 |
| H | -3.209476 | -3.532925 | 0.346099  |
| H | -3.347573 | 1.357972  | 1.893174  |
| H | -1.158118 | 1.015289  | 1.301139  |
| H | 0.632029  | -0.594315 | 1.471716  |
| H | -0.695187 | -1.479600 | -1.127287 |
| H | 1.305816  | 1.685945  | 2.785265  |
| H | 2.008316  | 3.215168  | 1.990021  |
| H | -2.598438 | 2.848111  | -0.131147 |
| H | -0.882022 | 0.797495  | -1.600149 |
| H | -2.815786 | 2.251278  | -1.769003 |
| H | -2.002019 | -2.971445 | 2.521900  |
| H | -2.723074 | -1.370540 | 2.435402  |
| H | -0.972039 | -1.538990 | 2.643418  |
| H | -5.617108 | -1.694389 | -1.483305 |
| H | 3.212402  | -0.878934 | -1.988546 |
| H | 3.766842  | 0.567914  | -1.183267 |
| H | 5.598320  | -0.954340 | -1.725021 |

|   |          |           |           |
|---|----------|-----------|-----------|
| H | 6.807283 | -0.957606 | 0.418063  |
| H | 5.878547 | 0.538928  | 0.251143  |
| H | 5.291898 | -0.752762 | 1.315742  |
| H | 5.930733 | -3.145426 | -0.642210 |
| H | 4.410678 | -3.140623 | -1.546748 |
| H | 4.393247 | -2.990990 | 0.221864  |

B3LYP energy = -1155.15521256 a.u.

(2S,6R,7S,8R)-1, Conf. M

|   |           |           |           |
|---|-----------|-----------|-----------|
| C | -3.605516 | -1.944875 | -0.294200 |
| C | -3.193522 | -0.646137 | -0.933247 |
| C | -3.294636 | 0.593938  | -0.422328 |
| C | -4.110863 | 0.964197  | 0.794416  |
| C | -1.360753 | -1.914716 | 0.897863  |
| C | -2.341543 | -2.763407 | 0.113607  |
| C | -0.956847 | 1.506972  | -0.920789 |
| C | -0.398214 | 1.259435  | 0.516731  |
| C | 0.396002  | -0.070918 | 0.688184  |
| C | -0.407835 | -1.252262 | 0.221775  |
| O | -0.292753 | 2.697328  | -1.422979 |
| C | 0.485065  | 3.299521  | -0.481120 |
| C | 0.431365  | 2.494228  | 0.775472  |
| O | 1.091630  | 4.322417  | -0.697234 |
| C | 1.051861  | 2.884229  | 1.891816  |
| C | -2.481602 | 1.735319  | -1.025569 |
| C | -1.642748 | -1.742250 | 2.369514  |
| O | -4.333651 | -2.795956 | -1.192029 |
| O | 1.593666  | 0.023217  | -0.126080 |
| C | 2.793175  | -0.235470 | 0.465141  |
| O | 2.908900  | -0.533219 | 1.637339  |
| C | 3.934051  | -0.108763 | -0.520788 |
| C | 4.542094  | -1.469867 | -0.962560 |
| C | 5.252200  | -2.202909 | 0.184833  |
| C | 3.502274  | -2.368801 | -1.649156 |
| H | -4.209958 | -1.762820 | 0.603373  |
| H | -2.609828 | -0.781219 | -1.845398 |
| H | -4.709708 | 0.138629  | 1.183538  |
| H | -4.795490 | 1.783953  | 0.541361  |
| H | -1.882409 | -3.120979 | -0.814220 |
| H | -2.674305 | -3.642429 | 0.677332  |
| H | -3.477561 | 1.338026  | 1.609761  |
| H | -1.225902 | 1.196811  | 1.229624  |
| H | 0.704972  | -0.158579 | 1.731827  |
| H | -0.292965 | -1.466473 | -0.838920 |
| H | 1.021291  | 2.300718  | 2.807214  |
| H | 1.620835  | 3.809332  | 1.896254  |
| H | -2.720596 | 2.677945  | -0.519786 |
| H | -0.660876 | 0.702149  | -1.595860 |
| H | -2.722578 | 1.880280  | -2.084963 |
| H | -1.711812 | -2.722344 | 2.857017  |
| H | -2.606867 | -1.243276 | 2.535773  |
| H | -0.872117 | -1.166049 | 2.887180  |
| H | -5.099697 | -2.307930 | -1.522518 |
| H | 3.583712  | 0.438379  | -1.400030 |
| H | 4.711580  | 0.486519  | -0.030277 |
| H | 5.301728  | -1.207313 | -1.711823 |

|   |          |           |           |
|---|----------|-----------|-----------|
| H | 5.732445 | -3.114847 | -0.187189 |
| H | 6.026655 | -1.575008 | 0.638932  |
| H | 4.550347 | -2.483976 | 0.975806  |
| H | 3.978911 | -3.269558 | -2.050718 |
| H | 3.006631 | -1.851603 | -2.478230 |
| H | 2.727182 | -2.693407 | -0.944761 |

B3LYP energy = -1155.15515922 a.u.

(2S,6R,7S,8R)-1, Conf. N

|   |           |           |           |
|---|-----------|-----------|-----------|
| C | 4.415594  | -0.603243 | -0.044446 |
| C | 3.575252  | 0.660371  | -0.090788 |
| C | 2.857126  | 1.241154  | 0.886478  |
| C | 2.939729  | 0.877359  | 2.349773  |
| C | 2.236339  | -1.773799 | -0.676876 |
| C | 3.529553  | -1.886384 | 0.101584  |
| C | 0.391874  | 1.648710  | 0.423057  |
| C | 0.100583  | 0.813123  | -0.864557 |
| C | -0.081718 | -0.714340 | -0.645826 |
| C | 1.149186  | -1.316864 | -0.033634 |
| O | -0.569071 | 2.740809  | 0.429278  |
| C | -1.449230 | 2.677603  | -0.606398 |
| C | -1.107484 | 1.500783  | -1.458035 |
| O | -2.338720 | 3.483306  | -0.752086 |
| C | -1.812031 | 1.194452  | -2.550184 |
| C | 1.802591  | 2.273629  | 0.529171  |
| C | 2.319763  | -1.998005 | -2.166102 |
| O | 5.360950  | -0.673099 | 1.031960  |
| O | -1.205062 | -0.903955 | 0.254572  |
| C | -2.134557 | -1.844356 | -0.073387 |
| O | -2.097458 | -2.490575 | -1.100602 |
| C | -3.192072 | -1.961853 | 1.001302  |
| C | -4.117025 | -0.724455 | 1.122326  |
| C | -4.914983 | -0.482328 | -0.167066 |
| C | -5.051968 | -0.893071 | 2.328879  |
| H | 4.960882  | -0.669748 | -0.997071 |
| H | 3.422405  | 1.038157  | -1.102447 |
| H | 3.654858  | 0.077280  | 2.539497  |
| H | 1.958686  | 0.579106  | 2.742242  |
| H | 3.316342  | -1.996673 | 1.169233  |
| H | 4.128398  | -2.750729 | -0.207661 |
| H | 3.246034  | 1.755877  | 2.933282  |
| H | 0.951209  | 0.910566  | -1.549673 |
| H | -0.334572 | -1.176044 | -1.602017 |
| H | 1.207558  | -1.194620 | 1.046064  |
| H | -1.577007 | 0.337542  | -3.174522 |
| H | -2.659547 | 1.812182  | -2.832486 |
| H | 2.038291  | 2.766741  | -0.420908 |
| H | 0.172577  | 1.060660  | 1.318279  |
| H | 1.746974  | 3.054123  | 1.297091  |
| H | 2.910794  | -1.211448 | -2.656982 |
| H | 1.339399  | -2.029692 | -2.647168 |
| H | 2.826874  | -2.946438 | -2.378853 |
| H | 5.951059  | 0.090085  | 0.970104  |
| H | -3.784421 | -2.852782 | 0.772291  |
| H | -2.682533 | -2.123173 | 1.958629  |
| H | -3.480308 | 0.150493  | 1.304879  |



|   |           |           |           |
|---|-----------|-----------|-----------|
| H | -5.544895 | 0.407973  | -0.068606 |
| H | -4.259940 | -0.330805 | -1.030925 |
| H | -5.567504 | -1.335787 | -0.389042 |
| H | -5.695680 | -0.014770 | 2.446205  |
| H | -4.488285 | -1.022592 | 3.259702  |
| H | -5.701885 | -1.768289 | 2.204265  |

B3LYP energy = -1155.15511951 a.u.

(2S,6R,7S,8R)-1, Conf. O

|   |           |           |           |
|---|-----------|-----------|-----------|
| C | -3.763040 | -1.655050 | -0.473828 |
| C | -3.143201 | -0.456292 | -1.131198 |
| C | -3.149715 | 0.814090  | -0.695377 |
| C | -4.043734 | 1.352511  | 0.396933  |
| C | -1.667700 | -1.763545 | 0.990516  |
| C | -2.635227 | -2.559974 | 0.138911  |
| C | -0.687361 | 1.444020  | -0.967053 |
| C | -0.323985 | 1.258345  | 0.540585  |
| C | 0.293157  | -0.129143 | 0.893725  |
| C | -0.572264 | -1.255470 | 0.402246  |
| O | 0.162632  | 2.510934  | -1.467860 |
| C | 0.895227  | 3.101564  | -0.484402 |
| C | 0.606052  | 2.416258  | 0.811023  |
| O | 1.640334  | 4.029527  | -0.696978 |
| C | 1.132555  | 2.834881  | 1.964625  |
| C | -2.154836 | 1.818540  | -1.269514 |
| C | -2.103682 | -1.454792 | 2.401036  |
| O | -4.492255 | -2.386880 | -1.467213 |
| O | 1.582479  | -0.216075 | 0.234581  |
| C | 2.669270  | -0.543096 | 0.987509  |
| O | 2.614581  | -0.765145 | 2.179885  |
| C | 3.925241  | -0.574103 | 0.145523  |
| C | 3.899431  | -1.603218 | -1.010066 |
| C | 5.178605  | -1.473911 | -1.849819 |
| C | 3.720061  | -3.036684 | -0.488104 |
| H | -4.445835 | -1.347252 | 0.327679  |
| H | -2.496359 | -0.711677 | -1.971564 |
| H | -3.465573 | 1.726527  | 1.252311  |
| H | -4.765000 | 0.621594  | 0.767127  |
| H | -2.108393 | -3.021202 | -0.703539 |
| H | -3.110743 | -3.365392 | 0.716031  |
| H | -4.609653 | 2.211413  | 0.013748  |
| H | -1.227192 | 1.340994  | 1.152140  |
| H | 0.462943  | -0.171245 | 1.971560  |
| H | -0.354444 | -1.559669 | -0.619626 |
| H | 0.929277  | 2.339879  | 2.909572  |
| H | 1.798041  | 3.693166  | 1.972254  |
| H | -2.344894 | 2.817078  | -0.859310 |
| H | -0.412785 | 0.558931  | -1.543061 |
| H | -2.258063 | 1.902677  | -2.357374 |
| H | -2.339217 | -2.383749 | 2.934957  |
| H | -3.017866 | -0.846700 | 2.414726  |
| H | -1.339982 | -0.926005 | 2.976115  |
| H | -4.834734 | -3.199938 | -1.071083 |
| H | 4.069509  | 0.430667  | -0.270493 |
| H | 4.758007  | -0.783562 | 0.823351  |
| H | 3.043477  | -1.358075 | -1.651271 |

|   |          |           |           |
|---|----------|-----------|-----------|
| H | 5.164521 | -2.175128 | -2.691320 |
| H | 5.290924 | -0.462970 | -2.256932 |
| H | 6.068725 | -1.695205 | -1.247724 |
| H | 3.695721 | -3.750970 | -1.318372 |
| H | 2.789666 | -3.153343 | 0.078241  |
| H | 4.548626 | -3.319315 | 0.172919  |

B3LYP energy = -1155.15492832 a.u.

(2S,6R,7S,8R)-1, Conf. P

|   |           |           |           |
|---|-----------|-----------|-----------|
| C | -3.764039 | -1.656431 | -0.456888 |
| C | -3.132491 | -0.460404 | -1.119160 |
| C | -3.154884 | 0.819665  | -0.711501 |
| C | -4.077212 | 1.370167  | 0.350066  |
| C | -1.667030 | -1.778528 | 0.986435  |
| C | -2.640828 | -2.574021 | 0.140676  |
| C | -0.684547 | 1.429280  | -0.966602 |
| C | -0.330652 | 1.239783  | 0.542549  |
| C | 0.293705  | -0.145768 | 0.893533  |
| C | -0.566324 | -1.276543 | 0.402151  |
| O | 0.176341  | 2.488900  | -1.462669 |
| C | 0.898777  | 3.081717  | -0.472011 |
| C | 0.592533  | 2.401079  | 0.821757  |
| O | 1.648253  | 4.007047  | -0.679663 |
| C | 1.102305  | 2.824642  | 1.981086  |
| C | -2.147472 | 1.817577  | -1.275304 |
| C | -2.108758 | -1.456359 | 2.392481  |
| O | -4.610515 | -2.416126 | -1.327039 |
| O | 1.583379  | -0.224095 | 0.234014  |
| C | 2.673970  | -0.537028 | 0.988012  |
| O | 2.621729  | -0.755790 | 2.180911  |
| C | 3.930525  | -0.555737 | 0.146325  |
| C | 3.914487  | -1.581045 | -1.012464 |
| C | 5.193044  | -1.437815 | -1.850948 |
| C | 3.747181  | -3.017635 | -0.495076 |
| H | -4.428652 | -1.344230 | 0.351113  |
| H | -2.445396 | -0.719447 | -1.929240 |
| H | -3.518679 | 1.765834  | 1.208731  |
| H | -4.642286 | 2.216390  | -0.061442 |
| H | -2.110274 | -3.038602 | -0.700359 |
| H | -3.127722 | -3.376532 | 0.706208  |
| H | -4.800088 | 0.639962  | 0.718025  |
| H | -1.238231 | 1.314715  | 1.148752  |
| H | 0.463902  | -0.187482 | 1.971357  |
| H | -0.340312 | -1.587024 | -0.616306 |
| H | 0.886315  | 2.332687  | 2.924789  |
| H | 1.766470  | 3.683859  | 1.995182  |
| H | -2.331816 | 2.815156  | -0.860437 |
| H | -0.414186 | 0.542159  | -1.541484 |
| H | -2.244010 | 1.910763  | -2.363232 |
| H | -1.340145 | -0.939408 | 2.971783  |
| H | -2.366771 | -2.378696 | 2.926819  |
| H | -3.011637 | -0.831338 | 2.396456  |
| H | -4.124280 | -2.625237 | -2.136824 |
| H | 4.066862  | 0.451674  | -0.266110 |
| H | 4.764501  | -0.760077 | 0.824234  |
| H | 3.056838  | -1.341214 | -1.653495 |

|   |          |           |           |
|---|----------|-----------|-----------|
| H | 5.186039 | -2.136461 | -2.694706 |
| H | 5.296736 | -0.424604 | -2.254731 |
| H | 6.084663 | -1.653022 | -1.248907 |
| H | 3.729244 | -3.729752 | -1.327396 |
| H | 2.817749 | -3.143882 | 0.070809  |
| H | 4.577931 | -3.295251 | 0.165279  |

B3LYP energy = -1155.15491422 a.u.

(2R,6R,7S,8S)-1, Conf. A

|   |           |           |           |
|---|-----------|-----------|-----------|
| C | -4.121283 | -1.527050 | -0.323972 |
| C | -3.668669 | -0.087744 | -0.253172 |
| C | -3.128756 | 0.662441  | -1.226991 |
| C | -3.065864 | 0.250225  | -2.678086 |
| C | -1.768696 | -1.987613 | 0.590333  |
| C | -2.910400 | -2.520396 | -0.250852 |
| C | -0.891053 | 1.745722  | -0.678612 |
| C | -0.449482 | 1.114042  | 0.680954  |
| C | 0.154702  | -0.315737 | 0.593882  |
| C | -0.811106 | -1.278000 | -0.031515 |
| O | -0.265461 | 3.057316  | -0.744786 |
| C | 0.548549  | 3.309697  | 0.316094  |
| C | 0.499403  | 2.145651  | 1.248130  |
| O | 1.177482  | 4.336866  | 0.420794  |
| C | 1.215255  | 2.118218  | 2.375184  |
| C | -2.410821 | 1.952435  | -0.876292 |
| C | -1.900637 | -2.139108 | 2.084304  |
| O | -4.981648 | -1.843720 | 0.781859  |
| O | 1.350646  | -0.241857 | -0.229503 |
| C | 2.526094  | -0.671683 | 0.302949  |
| O | 2.627595  | -1.140714 | 1.417947  |
| C | 3.667807  | -0.440898 | -0.665099 |
| C | 4.911092  | -1.306320 | -0.399575 |
| C | 4.636574  | -2.791106 | -0.683144 |
| C | 6.097956  | -0.794057 | -1.229234 |
| H | -4.654889 | -1.733626 | -1.262237 |
| H | -3.648346 | 0.303703  | 0.764499  |
| H | -3.465252 | 1.047184  | -3.317491 |
| H | -3.629423 | -0.662545 | -2.883819 |
| H | -2.559360 | -2.685533 | -1.274829 |
| H | -3.301708 | -3.471408 | 0.127449  |
| H | -2.030742 | 0.080888  | -3.004586 |
| H | -1.327439 | 1.023117  | 1.331671  |
| H | 0.454595  | -0.626854 | 1.595761  |
| H | -0.820149 | -1.246920 | -1.119811 |
| H | 1.199204  | 1.273425  | 3.056923  |
| H | 1.851593  | 2.962034  | 2.625588  |
| H | -2.824841 | 2.395718  | 0.036721  |
| H | -0.475661 | 1.180039  | -1.517524 |
| H | -2.528889 | 2.690239  | -1.678360 |
| H | -2.791176 | -1.615407 | 2.453873  |
| H | -1.026811 | -1.775174 | 2.629847  |
| H | -2.042402 | -3.195606 | 2.341605  |
| H | -5.742104 | -1.246987 | 0.762621  |
| H | 3.297325  | -0.579788 | -1.687634 |
| H | 3.923073  | 0.624924  | -0.579299 |

|   |          |           |           |
|---|----------|-----------|-----------|
| H | 5.160063 | -1.204015 | 0.663898  |
| H | 5.522652 | -3.397878 | -0.466620 |
| H | 3.815362 | -3.171858 | -0.068333 |
| H | 4.377900 | -2.946561 | -1.738721 |
| H | 6.996787 | -1.387815 | -1.030861 |
| H | 6.329692 | 0.251951  | -0.998095 |
| H | 5.888040 | -0.860709 | -2.304415 |

B3LYP energy = -1155.15856156 a.u.

(2R,6R,7S,8S)-1, Conf. B

|   |           |           |           |
|---|-----------|-----------|-----------|
| C | -4.309677 | -1.202520 | -0.296462 |
| C | -3.703835 | 0.177507  | -0.192265 |
| C | -3.112614 | 0.902781  | -1.155207 |
| C | -3.129130 | 0.539778  | -2.620730 |
| C | -1.995688 | -1.941218 | 0.533908  |
| C | -3.212366 | -2.323049 | -0.283313 |
| C | -0.759965 | 1.730757  | -0.634870 |
| C | -0.354046 | 0.996869  | 0.684129  |
| C | 0.094750  | -0.480788 | 0.520136  |
| C | -0.990163 | -1.312269 | -0.098465 |
| O | -0.005097 | 2.973926  | -0.661652 |
| C | 0.854526  | 3.094275  | 0.387296  |
| C | 0.708262  | 1.899356  | 1.268483  |
| O | 1.585614  | 4.047691  | 0.520166  |
| C | 1.441715  | 1.747072  | 2.374044  |
| C | -2.254810 | 2.098241  | -0.781107 |
| C | -2.093909 | -2.133488 | 2.025626  |
| O | -5.175546 | -1.460966 | 0.820345  |
| O | 1.259627  | -0.492601 | -0.348939 |
| C | 2.354765  | -1.190150 | 0.057288  |
| O | 2.429503  | -1.758918 | 1.126919  |
| C | 3.423213  | -1.183440 | -1.016381 |
| C | 4.843517  | -1.471662 | -0.500829 |
| C | 5.789573  | -1.737500 | -1.681607 |
| C | 5.366515  | -0.327326 | 0.380547  |
| H | -4.882323 | -1.319331 | -1.227039 |
| H | -3.615470 | 0.527138  | 0.836891  |
| H | -3.784181 | -0.306358 | -2.840114 |
| H | -2.124492 | 0.283327  | -2.983476 |
| H | -2.910818 | -2.498709 | -1.321162 |
| H | -3.694247 | -3.235403 | 0.085147  |
| H | -3.465734 | 1.394253  | -3.220819 |
| H | -1.221004 | 0.965859  | 1.354683  |
| H | 0.399346  | -0.862741 | 1.495719  |
| H | -1.033970 | -1.238120 | -1.183826 |
| H | 1.350742  | 0.878484  | 3.019279  |
| H | 2.167128  | 2.508547  | 2.644993  |
| H | -2.597156 | 2.546604  | 0.158689  |
| H | -0.423101 | 1.164285  | -1.507639 |
| H | -2.316753 | 2.874026  | -1.553054 |
| H | -2.921068 | -1.545220 | 2.442377  |
| H | -1.173983 | -1.869156 | 2.552290  |
| H | -2.323102 | -3.181652 | 2.252643  |
| H | -5.866089 | -0.784557 | 0.838768  |
| H | 3.122697  | -1.951127 | -1.743973 |
| H | 3.380512  | -0.227190 | -1.550734 |

|   |          |           |           |
|---|----------|-----------|-----------|
| H | 4.790895 | -2.378688 | 0.114039  |
| H | 6.800269 | -1.966155 | -1.326705 |
| H | 5.448999 | -2.584135 | -2.289032 |
| H | 5.859900 | -0.860733 | -2.337860 |
| H | 6.368124 | -0.556908 | 0.760186  |
| H | 4.715355 | -0.156891 | 1.243085  |
| H | 5.432901 | 0.608145  | -0.189390 |

B3LYP energy = -1155.15846845 a.u.

(2R,6R,7S,8S)-1, Conf. C

|   |           |           |           |
|---|-----------|-----------|-----------|
| C | 3.940480  | -1.444760 | 0.337225  |
| C | 3.448901  | -0.022217 | 0.466301  |
| C | 2.777453  | 0.537952  | 1.485217  |
| C | 2.565107  | -0.122423 | 2.826157  |
| C | 1.726861  | -1.767953 | -0.919553 |
| C | 2.781593  | -2.425920 | -0.054198 |
| C | 0.583227  | 1.678200  | 0.865984  |
| C | 0.322758  | 1.287986  | -0.625206 |
| C | -0.236152 | -0.142755 | -0.859165 |
| C | 0.685514  | -1.185566 | -0.300374 |
| O | -0.083782 | 2.953017  | 1.079051  |
| C | -0.774535 | 3.378687  | -0.013974 |
| C | -0.589325 | 2.389980  | -1.115405 |
| O | -1.412323 | 4.405626  | -0.017512 |
| C | -1.182349 | 2.541817  | -2.302339 |
| C | 2.062415  | 1.861124  | 1.279296  |
| C | 2.029957  | -1.659251 | -2.392056 |
| O | 4.933093  | -1.546418 | -0.696057 |
| O | -1.521384 | -0.231219 | -0.186553 |
| C | -2.600283 | -0.631533 | -0.913672 |
| O | -2.547750 | -0.909956 | -2.094419 |
| C | -3.848035 | -0.671030 | -0.059740 |
| C | -3.798474 | -1.701949 | 1.094269  |
| C | -5.068319 | -1.585200 | 1.949915  |
| C | -3.612548 | -3.133401 | 0.569167  |
| H | 4.369088  | -1.808415 | 1.281486  |
| H | 3.527644  | 0.541280  | -0.464070 |
| H | 3.123678  | -1.055140 | 2.931853  |
| H | 1.504507  | -0.349764 | 2.999731  |
| H | 2.320413  | -2.775519 | 0.875473  |
| H | 3.246922  | -3.288674 | -0.543700 |
| H | 2.873022  | 0.551283  | 3.635386  |
| H | 1.271826  | 1.325067  | -1.173151 |
| H | -0.407671 | -0.277887 | -1.928100 |
| H | 0.576316  | -1.340939 | 0.771663  |
| H | -1.070425 | 1.821833  | -3.107163 |
| H | -1.814061 | 3.407608  | -2.478108 |
| H | 2.566801  | 2.462382  | 0.514066  |
| H | 0.088223  | 0.971914  | 1.538755  |
| H | 2.062406  | 2.447936  | 2.205220  |
| H | 1.216739  | -1.206168 | -2.963723 |
| H | 2.220755  | -2.655429 | -2.809006 |
| H | 2.946094  | -1.079589 | -2.560608 |
| H | 5.664593  | -0.951652 | -0.481781 |
| H | -3.998872 | 0.331353  | 0.359022  |
| H | -4.685737 | -0.891134 | -0.727989 |

|   |           |           |           |
|---|-----------|-----------|-----------|
| H | -2.936430 | -1.450010 | 1.725114  |
| H | -5.037478 | -2.287133 | 2.790395  |
| H | -5.185859 | -0.575601 | 2.359116  |
| H | -5.963420 | -1.814514 | 1.358424  |
| H | -3.573881 | -3.847725 | 1.398900  |
| H | -2.687679 | -3.242320 | -0.007257 |
| H | -4.445812 | -3.422176 | -0.083128 |

B3LYP energy = -1155.15771223 a.u.

(2R,6R,7S,8S)-1, Conf. D

|   |           |           |           |
|---|-----------|-----------|-----------|
| C | 4.393831  | -0.598803 | 0.425596  |
| C | 3.564503  | 0.638242  | 0.172291  |
| C | 2.839562  | 1.350807  | 1.049563  |
| C | 2.887534  | 1.156181  | 2.545958  |
| C | 2.261141  | -1.812035 | -0.331419 |
| C | 3.503555  | -1.884904 | 0.532698  |
| C | 0.395341  | 1.691021  | 0.430467  |
| C | 0.159816  | 0.771826  | -0.810301 |
| C | -0.046375 | -0.735084 | -0.494152 |
| C | 1.147294  | -1.299629 | 0.219180  |
| O | -0.574027 | 2.771126  | 0.332019  |
| C | -1.406430 | 2.639642  | -0.736703 |
| C | -1.013052 | 1.423061  | -1.506056 |
| O | -2.296363 | 3.425119  | -0.966052 |
| C | -1.649148 | 1.060030  | -2.622668 |
| C | 1.797176  | 2.333242  | 0.545563  |
| C | 2.426557  | -2.150417 | -1.790800 |
| O | 5.312192  | -0.822207 | -0.656147 |
| O | -1.216689 | -0.846510 | 0.359227  |
| C | -2.113055 | -1.835237 | 0.087009  |
| O | -1.998581 | -2.602555 | -0.846768 |
| C | -3.250712 | -1.825931 | 1.083153  |
| C | -4.244317 | -0.652009 | 0.885899  |
| C | -4.944349 | -0.719099 | -0.479097 |
| C | -5.266729 | -0.641479 | 2.031929  |
| H | 4.960084  | -0.516376 | 1.363793  |
| H | 3.440699  | 0.856226  | -0.889015 |
| H | 3.675319  | 0.467121  | 2.858626  |
| H | 1.935280  | 0.768145  | 2.932301  |
| H | 3.208295  | -1.992190 | 1.581658  |
| H | 4.143209  | -2.736580 | 0.275737  |
| H | 3.056893  | 2.116178  | 3.049160  |
| H | 1.043191  | 0.814973  | -1.457899 |
| H | -0.256781 | -1.263470 | -1.425592 |
| H | 1.151063  | -1.098638 | 1.289374  |
| H | -1.370887 | 0.177487  | -3.191086 |
| H | -2.481371 | 1.656606  | -2.984682 |
| H | 2.079618  | 2.735910  | -0.434021 |
| H | 0.147866  | 1.160118  | 1.353825  |
| H | 1.703090  | 3.182547  | 1.232110  |
| H | 3.136287  | -1.467371 | -2.274416 |
| H | 1.483855  | -2.127821 | -2.342436 |
| H | 2.853501  | -3.154960 | -1.895460 |
| H | 5.879259  | -0.044295 | -0.745523 |
| H | -3.775664 | -2.780719 | 0.982606  |
| H | -2.823956 | -1.768149 | 2.090812  |

|   |           |           |           |
|---|-----------|-----------|-----------|
| H | -3.670181 | 0.282069  | 0.934795  |
| H | -5.624127 | 0.130347  | -0.604184 |
| H | -4.229390 | -0.698738 | -1.307544 |
| H | -5.533107 | -1.640119 | -0.571362 |
| H | -5.960076 | 0.199715  | 1.925621  |
| H | -4.776197 | -0.550346 | 3.007637  |
| H | -5.860883 | -1.563997 | 2.038257  |

B3LYP energy = -1155.15750883 a.u.

(2R,6R,7S,8S)-1, Conf. E

|   |           |           |           |
|---|-----------|-----------|-----------|
| C | -4.135328 | -1.511528 | -0.298945 |
| C | -3.683687 | -0.074635 | -0.255447 |
| C | -3.116068 | 0.642835  | -1.236008 |
| C | -3.024595 | 0.191805  | -2.674313 |
| C | -1.763923 | -1.985885 | 0.570228  |
| C | -2.909371 | -2.502504 | -0.273673 |
| C | -0.889762 | 1.748714  | -0.695917 |
| C | -0.457774 | 1.119688  | 0.667583  |
| C | 0.152557  | -0.307784 | 0.586334  |
| C | -0.806464 | -1.271584 | -0.046492 |
| O | -0.270788 | 3.064034  | -0.755925 |
| C | 0.533693  | 3.319388  | 0.310937  |
| C | 0.482555  | 2.154655  | 1.242492  |
| O | 1.157889  | 4.348955  | 0.421382  |
| C | 1.189532  | 2.130150  | 2.375157  |
| C | -2.408485 | 1.944042  | -0.907669 |
| C | -1.895594 | -2.144744 | 2.063745  |
| O | -4.984211 | -1.690258 | 0.843372  |
| O | 1.354833  | -0.230698 | -0.227346 |
| C | 2.523740  | -0.672198 | 0.309277  |
| O | 2.614085  | -1.154827 | 1.419537  |
| C | 3.674453  | -0.435543 | -0.646695 |
| C | 4.910767  | -1.311157 | -0.382063 |
| C | 4.630207  | -2.790743 | -0.686201 |
| C | 6.107205  | -0.795448 | -1.195668 |
| H | -4.708607 | -1.722651 | -1.213056 |
| H | -3.715404 | 0.347877  | 0.748004  |
| H | -1.983064 | 0.041574  | -2.989236 |
| H | -3.440091 | 0.960271  | -3.338191 |
| H | -2.571418 | -2.632284 | -1.307810 |
| H | -3.271363 | -3.479704 | 0.074270  |
| H | -3.563793 | -0.739732 | -2.861432 |
| H | -1.341892 | 1.025675  | 1.309548  |
| H | 0.445042  | -0.618023 | 1.590656  |
| H | -0.814029 | -1.233593 | -1.134277 |
| H | 1.171192  | 1.285452  | 3.057024  |
| H | 1.819933  | 2.976799  | 2.630949  |
| H | -2.830982 | 2.402686  | -0.006324 |
| H | -0.461909 | 1.185983  | -1.530601 |
| H | -2.525319 | 2.665515  | -1.724857 |
| H | -2.051315 | -3.200865 | 2.316398  |
| H | -2.774829 | -1.606159 | 2.438865  |
| H | -1.013636 | -1.799449 | 2.608094  |
| H | -5.364358 | -2.577836 | 0.817345  |
| H | 3.311426  | -0.559515 | -1.673812 |
| H | 3.934715  | 0.627694  | -0.545518 |

|   |          |           |           |
|---|----------|-----------|-----------|
| H | 5.151616 | -1.223464 | 0.684574  |
| H | 5.510771 | -3.405413 | -0.469405 |
| H | 3.801413 | -3.173986 | -0.083187 |
| H | 4.379903 | -2.931769 | -1.745819 |
| H | 7.001027 | -1.396821 | -0.997590 |
| H | 6.342926 | 0.246212  | -0.949487 |
| H | 5.905629 | -0.847268 | -2.273256 |

B3LYP energy = -1155.15733917 a.u.

(2R,6R,7S,8S)-1, Conf. F

|   |           |           |           |
|---|-----------|-----------|-----------|
| C | -4.330708 | -1.168988 | -0.267699 |
| C | -3.718648 | 0.205471  | -0.182315 |
| C | -3.107576 | 0.901662  | -1.152134 |
| C | -3.113373 | 0.510636  | -2.610733 |
| C | -2.001636 | -1.938617 | 0.499988  |
| C | -3.224715 | -2.292314 | -0.318178 |
| C | -0.755584 | 1.733524  | -0.644246 |
| C | -0.355859 | 0.993684  | 0.673046  |
| C | 0.091426  | -0.483901 | 0.503963  |
| C | -0.993204 | -1.307307 | -0.125418 |
| O | 0.002134  | 2.975442  | -0.663232 |
| C | 0.858168  | 3.089452  | 0.388743  |
| C | 0.705490  | 1.891737  | 1.265499  |
| O | 1.592161  | 4.039859  | 0.528048  |
| C | 1.432626  | 1.734887  | 2.374550  |
| C | -2.249413 | 2.101402  | -0.793798 |
| C | -2.098879 | -2.146564 | 1.989968  |
| O | -5.163468 | -1.298955 | 0.893133  |
| O | 1.261455  | -0.494557 | -0.358085 |
| C | 2.350571  | -1.199973 | 0.050002  |
| O | 2.414117  | -1.780716 | 1.114057  |
| C | 3.428965  | -1.185661 | -1.013596 |
| C | 4.845561  | -1.467821 | -0.484257 |
| C | 5.805133  | -1.725857 | -1.655785 |
| C | 5.353122  | -0.322730 | 0.405106  |
| H | -4.948460 | -1.275614 | -1.170878 |
| H | -3.666895 | 0.580811  | 0.838847  |
| H | -3.768700 | -0.338522 | -2.818153 |
| H | -2.107708 | 0.248971  | -2.966826 |
| H | -2.937458 | -2.423789 | -1.367320 |
| H | -3.683546 | -3.234087 | 0.012386  |
| H | -3.449876 | 1.353568  | -3.227149 |
| H | -1.225963 | 0.960608  | 1.339340  |
| H | 0.388950  | -0.872265 | 1.479171  |
| H | -1.036477 | -1.220015 | -1.209508 |
| H | 1.335988  | 0.864871  | 3.017061  |
| H | 2.157879  | 2.494254  | 2.651757  |
| H | -2.590955 | 2.560665  | 0.140900  |
| H | -0.415672 | 1.170549  | -1.518127 |
| H | -2.311400 | 2.868418  | -1.574636 |
| H | -2.345279 | -3.193448 | 2.206913  |
| H | -2.910999 | -1.544583 | 2.416564  |
| H | -1.171278 | -1.907406 | 2.514969  |
| H | -5.640405 | -2.137591 | 0.845767  |
| H | 3.139678  | -1.953955 | -1.745111 |
| H | 3.386842  | -0.228729 | -1.546598 |

|   |          |           |           |
|---|----------|-----------|-----------|
| H | 4.791272 | -2.376588 | 0.127898  |
| H | 6.813332 | -1.949901 | -1.290942 |
| H | 5.475469 | -2.572937 | -2.268618 |
| H | 5.877524 | -0.847236 | -2.309300 |
| H | 6.351813 | -0.547818 | 0.794975  |
| H | 4.691857 | -0.157548 | 1.260970  |
| H | 5.420468 | 0.614388  | -0.161957 |

B3LYP energy = -1155.15721714 a.u.

(2R,6R,7S,8S)-1, Conf. G

|   |           |           |           |
|---|-----------|-----------|-----------|
| C | 3.964104  | -1.416564 | 0.330673  |
| C | 3.466926  | -0.002793 | 0.488458  |
| C | 2.755501  | 0.515869  | 1.500097  |
| C | 2.505558  | -0.189479 | 2.811773  |
| C | 1.732860  | -1.765093 | -0.896686 |
| C | 2.788380  | -2.406420 | -0.022213 |
| C | 0.572422  | 1.673355  | 0.884561  |
| C | 0.332148  | 1.286800  | -0.610666 |
| C | -0.229826 | -0.141289 | -0.853549 |
| C | 0.684547  | -1.185856 | -0.286250 |
| O | -0.091527 | 2.951395  | 1.089588  |
| C | -0.765441 | 3.380686  | -0.011896 |
| C | -0.568400 | 2.392813  | -1.112412 |
| O | -1.400122 | 4.409619  | -0.023492 |
| C | -1.142891 | 2.549193  | -2.307793 |
| C | 2.046017  | 1.845227  | 1.319220  |
| C | 2.044801  | -1.654763 | -2.367505 |
| O | 4.948097  | -1.370876 | -0.712050 |
| O | -1.522089 | -0.226371 | -0.194723 |
| C | -2.591053 | -0.639074 | -0.929241 |
| O | -2.523363 | -0.934457 | -2.105139 |
| C | -3.848741 | -0.669721 | -0.089610 |
| C | -3.812342 | -1.691011 | 1.073494  |
| C | -5.090504 | -1.565384 | 1.915401  |
| C | -3.623077 | -3.127061 | 0.562332  |
| H | 4.432681  | -1.781257 | 1.256024  |
| H | 3.604620  | 0.595487  | -0.411225 |
| H | 2.803406  | 0.453433  | 3.649507  |
| H | 3.056251  | -1.129076 | 2.898465  |
| H | 2.334792  | -2.726562 | 0.922416  |
| H | 3.226766  | -3.298483 | -0.490157 |
| H | 1.440265  | -0.413730 | 2.957918  |
| H | 1.289737  | 1.319374  | -1.143934 |
| H | -0.390301 | -0.274707 | -1.924435 |
| H | 0.566097  | -1.340174 | 0.784663  |
| H | -1.020812 | 1.830688  | -3.112533 |
| H | -1.768290 | 3.417871  | -2.491667 |
| H | 2.560045  | 2.463290  | 0.574253  |
| H | 0.062789  | 0.969165  | 1.548575  |
| H | 2.036307  | 2.410141  | 2.258813  |
| H | 2.945281  | -1.049926 | -2.531817 |
| H | 1.223352  | -1.226017 | -2.945958 |
| H | 2.261487  | -2.647636 | -2.780791 |
| H | 5.356802  | -2.241898 | -0.797784 |
| H | -4.003408 | 0.336109  | 0.319165  |
| H | -4.679075 | -0.895207 | -0.765222 |

|   |           |           |           |
|---|-----------|-----------|-----------|
| H | -2.956368 | -1.434746 | 1.710833  |
| H | -5.069379 | -2.260361 | 2.761970  |
| H | -5.210400 | -0.552289 | 2.315125  |
| H | -5.980026 | -1.798044 | 1.316835  |
| H | -3.592402 | -3.834362 | 1.398410  |
| H | -2.693350 | -3.241519 | -0.005155 |
| H | -4.450767 | -3.420657 | -0.094894 |

B3LYP energy = -1155.15649248 a.u.

(2R,6R,7S,8S)-1, Conf. H

|   |           |           |           |
|---|-----------|-----------|-----------|
| C | 4.405662  | -0.580871 | 0.389620  |
| C | 3.578503  | 0.659439  | 0.169357  |
| C | 2.835545  | 1.328848  | 1.063141  |
| C | 2.868532  | 1.080315  | 2.552210  |
| C | 2.255742  | -1.802348 | -0.317380 |
| C | 3.498537  | -1.860884 | 0.544822  |
| C | 0.394628  | 1.695413  | 0.455950  |
| C | 0.164837  | 0.786148  | -0.792775 |
| C | -0.048115 | -0.722054 | -0.487661 |
| C | 1.140350  | -1.290670 | 0.230761  |
| O | -0.571287 | 2.779032  | 0.358853  |
| C | -1.397304 | 2.656897  | -0.715358 |
| C | -1.001013 | 1.445601  | -1.492135 |
| O | -2.285212 | 3.444903  | -0.944430 |
| C | -1.628111 | 1.094581  | -2.617596 |
| C | 1.798550  | 2.329166  | 0.584785  |
| C | 2.421432  | -2.140508 | -1.777125 |
| O | 5.271293  | -0.681036 | -0.749646 |
| O | -1.225267 | -0.835632 | 0.355601  |
| C | -2.104940 | -1.840427 | 0.088821  |
| O | -1.968503 | -2.620988 | -0.831064 |
| C | -3.254292 | -1.831564 | 1.071373  |
| C | -4.252771 | -0.665139 | 0.856003  |
| C | -4.932617 | -0.741874 | -0.518665 |
| C | -5.291379 | -0.657667 | 1.987352  |
| H | 5.014615  | -0.498053 | 1.301315  |
| H | 3.493796  | 0.927665  | -0.882931 |
| H | 3.640752  | 0.365310  | 2.845523  |
| H | 1.906700  | 0.701930  | 2.923820  |
| H | 3.208177  | -1.930224 | 1.599032  |
| H | 4.115687  | -2.741618 | 0.320332  |
| H | 3.058442  | 2.018968  | 3.087694  |
| H | 1.053769  | 0.830837  | -1.432581 |
| H | -0.251865 | -1.244925 | -1.423678 |
| H | 1.140925  | -1.088901 | 1.300503  |
| H | -1.346130 | 0.217275  | -3.192341 |
| H | -2.455687 | 1.696443  | -2.981489 |
| H | 2.082483  | 2.753155  | -0.385232 |
| H | 0.138378  | 1.158928  | 1.373706  |
| H | 1.708978  | 3.162843  | 1.291128  |
| H | 1.474529  | -2.140756 | -2.321766 |
| H | 2.867309  | -3.137102 | -1.883230 |
| H | 3.110769  | -1.441095 | -2.266828 |
| H | 5.875763  | -1.423411 | -0.621194 |
| H | -3.771881 | -2.790350 | 0.970878  |
| H | -2.839275 | -1.765068 | 2.083496  |

|   |           |           |           |
|---|-----------|-----------|-----------|
| H | -3.685637 | 0.272880  | 0.909575  |
| H | -5.617412 | 0.101614  | -0.656031 |
| H | -4.206016 | -0.717631 | -1.336897 |
| H | -5.512488 | -1.667931 | -0.616855 |
| H | -5.988824 | 0.178390  | 1.868239  |
| H | -4.815375 | -0.559617 | 2.969556  |
| H | -5.879325 | -1.584197 | 1.988754  |

B3LYP energy = -1155.15630801 a.u.

(2R,6R,7S,8S)-1, Conf. I

|   |           |           |           |
|---|-----------|-----------|-----------|
| C | -4.125077 | -1.529364 | -0.169034 |
| C | -3.670853 | -0.091971 | -0.074834 |
| C | -3.209644 | 0.702407  | -1.054178 |
| C | -3.257745 | 0.355123  | -2.522768 |
| C | -1.708384 | -2.012545 | 0.548757  |
| C | -2.910211 | -2.519533 | -0.221550 |
| C | -0.940268 | 1.781612  | -0.631081 |
| C | -0.389943 | 1.092536  | 0.659115  |
| C | 0.206134  | -0.328437 | 0.462171  |
| C | -0.808244 | -1.269410 | -0.117654 |
| O | -0.331139 | 3.101747  | -0.682456 |
| C | 0.563759  | 3.311651  | 0.321146  |
| C | 0.599952  | 2.102267  | 1.194242  |
| O | 1.190593  | 4.339997  | 0.426241  |
| C | 1.413458  | 2.022393  | 2.250168  |
| C | -2.472238 | 1.981640  | -0.702754 |
| C | -1.718556 | -2.228956 | 2.040262  |
| O | -4.902519 | -1.892289 | 0.983062  |
| O | 1.326831  | -0.212171 | -0.455173 |
| C | 2.519496  | -0.756989 | -0.086384 |
| O | 2.694147  | -1.322778 | 0.972958  |
| C | 3.546722  | -0.529803 | -1.178723 |
| C | 4.928072  | -1.187096 | -0.987952 |
| C | 5.698363  | -0.618677 | 0.215284  |
| C | 4.848362  | -2.721897 | -0.943732 |
| H | -4.724816 | -1.702105 | -1.073470 |
| H | -3.572248 | 0.256518  | 0.953883  |
| H | -3.816894 | -0.561362 | -2.723939 |
| H | -2.249700 | 0.226579  | -2.939794 |
| H | -2.637372 | -2.647331 | -1.274269 |
| H | -3.270294 | -3.484763 | 0.151606  |
| H | -3.724864 | 1.169380  | -3.090670 |
| H | -1.212719 | 0.968550  | 1.373132  |
| H | 0.591248  | -0.680015 | 1.420618  |
| H | -0.910812 | -1.190432 | -1.198708 |
| H | 1.459417  | 1.143827  | 2.886526  |
| H | 2.066785  | 2.857020  | 2.487047  |
| H | -2.817826 | 2.380940  | 0.257851  |
| H | -0.586193 | 1.260076  | -1.524924 |
| H | -2.655690 | 2.752816  | -1.459965 |
| H | -2.584527 | -1.737174 | 2.500823  |
| H | -0.809659 | -1.872062 | 2.530254  |
| H | -1.823536 | -3.297715 | 2.262405  |
| H | -5.662665 | -1.297846 | 1.042948  |
| H | 3.091950  | -0.866973 | -2.118644 |
| H | 3.655920  | 0.558119  | -1.281970 |

|   |          |           |           |
|---|----------|-----------|-----------|
| H | 5.491866 | -0.915782 | -1.892234 |
| H | 5.206674 | -0.876654 | 1.157179  |
| H | 6.716801 | -1.022127 | 0.240740  |
| H | 5.775975 | 0.473582  | 0.157091  |
| H | 4.326888 | -3.118841 | -1.823177 |
| H | 4.320322 | -3.064831 | -0.049318 |
| H | 5.853740 | -3.157143 | -0.931082 |

B3LYP energy = -1155.15612817 a.u.

(2R,6R,7S,8S)-1, Conf. J

|   |           |           |           |
|---|-----------|-----------|-----------|
| C | -3.768356 | -1.800205 | -0.113357 |
| C | -3.463938 | -0.322489 | -0.194579 |
| C | -2.985201 | 0.373012  | -1.238494 |
| C | -2.854404 | -0.180218 | -2.637147 |
| C | -1.393810 | -1.923293 | 0.852027  |
| C | -2.465596 | -2.653679 | 0.069391  |
| C | -0.881558 | 1.744711  | -0.798490 |
| C | -0.394267 | 1.296976  | 0.617683  |
| C | 0.347254  | -0.066587 | 0.678010  |
| C | -0.514759 | -1.179002 | 0.159336  |
| O | -0.404832 | 3.106073  | -0.984935 |
| C | 0.366910  | 3.543002  | 0.048101  |
| C | 0.438875  | 2.470151  | 1.082165  |
| O | 0.876086  | 4.639277  | 0.058018  |
| C | 1.151050  | 2.619651  | 2.201946  |
| C | -2.411904 | 1.761631  | -1.022087 |
| C | -1.518521 | -1.944946 | 2.353790  |
| O | -4.607671 | -2.082613 | 1.017760  |
| O | 1.536772  | 0.038550  | -0.151071 |
| C | 2.730776  | -0.316966 | 0.397355  |
| O | 2.852583  | -0.699408 | 1.544264  |
| C | 3.861853  | -0.180564 | -0.599311 |
| C | 4.418873  | -1.538668 | -1.112369 |
| C | 5.126668  | -2.344242 | -0.013193 |
| C | 3.337904  | -2.373226 | -1.816412 |
| H | -4.265794 | -2.157975 | -1.025595 |
| H | -3.500351 | 0.174061  | 0.775662  |
| H | -3.306474 | -1.168647 | -2.745741 |
| H | -1.802063 | -0.262148 | -2.941125 |
| H | -2.085846 | -2.890521 | -0.929983 |
| H | -2.765098 | -3.593614 | 0.546049  |
| H | -3.333023 | 0.493127  | -3.359034 |
| H | -1.266584 | 1.183544  | 1.272613  |
| H | 0.669037  | -0.241229 | 1.705828  |
| H | -0.525341 | -1.253999 | -0.926688 |
| H | 1.221628  | 1.842036  | 2.956320  |
| H | 1.694358  | 3.544550  | 2.371903  |
| H | -2.883664 | 2.249679  | -0.161392 |
| H | -0.391986 | 1.152312  | -1.576879 |
| H | -2.597278 | 2.396032  | -1.896648 |
| H | -1.528621 | -2.981268 | 2.712678  |
| H | -2.471496 | -1.504403 | 2.672437  |
| H | -0.702454 | -1.422762 | 2.858623  |
| H | -5.423549 | -1.570912 | 0.932623  |
| H | 3.518035  | 0.417908  | -1.447189 |
| H | 4.665378  | 0.366199  | -0.094229 |

|   |          |           |           |
|---|----------|-----------|-----------|
| H | 5.172246 | -1.266574 | -1.864615 |
| H | 5.569448 | -3.253689 | -0.434629 |
| H | 5.930203 | -1.762451 | 0.451714  |
| H | 4.431099 | -2.636819 | 0.778935  |
| H | 3.778218 | -3.266901 | -2.271745 |
| H | 2.840181 | -1.802161 | -2.608153 |
| H | 2.569186 | -2.708695 | -1.110220 |

B3LYP energy = -1155.15594692 a.u.

(2R,6R,7S,8S)-1, Conf. A

|   |           |           |           |
|---|-----------|-----------|-----------|
| C | 3.730189  | -2.176062 | -0.285457 |
| C | 3.551200  | -0.765398 | -0.768269 |
| C | 3.631304  | 0.360791  | -0.038832 |
| C | 4.264629  | 0.469536  | 1.329366  |
| C | 1.275480  | -2.008637 | 0.405342  |
| C | 2.335874  | -2.880289 | -0.242237 |
| C | 1.552616  | 1.777787  | 0.162098  |
| C | 0.280540  | 1.292627  | -0.619335 |
| C | -0.303887 | -0.021796 | -0.020855 |
| C | 0.564799  | -1.188580 | -0.387468 |
| O | 1.350838  | 3.189378  | 0.443196  |
| C | 0.106083  | 3.621367  | 0.104455  |
| C | -0.624688 | 2.506780  | -0.566897 |
| O | -0.270273 | 4.748402  | 0.325494  |
| C | -1.847177 | 2.705293  | -1.069702 |
| C | 2.939718  | 1.623611  | -0.518530 |
| C | 1.202005  | -2.038508 | 1.910242  |
| O | 4.531238  | -2.980180 | -1.163940 |
| O | -1.621633 | -0.217437 | -0.617509 |
| C | -2.542405 | -0.878658 | 0.131816  |
| O | -2.347831 | -1.224817 | 1.279139  |
| C | -3.801713 | -1.150518 | -0.665857 |
| C | -5.063588 | -1.348325 | 0.191648  |
| C | -5.476258 | -0.047202 | 0.896429  |
| C | -6.208750 | -1.898510 | -0.671632 |
| H | 4.165279  | -2.191596 | 0.721399  |
| H | 3.112070  | -0.696941 | -1.764030 |
| H | 4.719393  | -0.462409 | 1.669738  |
| H | 3.546022  | 0.792135  | 2.093253  |
| H | 2.453179  | -3.838785 | 0.275539  |
| H | 2.067186  | -3.098237 | -1.281295 |
| H | 5.050011  | 1.235930  | 1.306605  |
| H | 0.547762  | 1.088192  | -1.663482 |
| H | -0.439126 | 0.084043  | 1.056746  |
| H | 0.696248  | -1.289799 | -1.464903 |
| H | -2.386899 | 1.931024  | -1.600025 |
| H | -2.315556 | 3.677602  | -0.945129 |
| H | 2.825700  | 1.625932  | -1.607918 |
| H | 1.579266  | 1.288272  | 1.141328  |
| H | 3.520014  | 2.512248  | -0.245677 |
| H | 1.058273  | -3.070948 | 2.251473  |
| H | 0.378787  | -1.442992 | 2.308572  |
| H | 2.140044  | -1.689537 | 2.361966  |
| H | 5.391443  | -2.552299 | -1.269359 |
| H | -3.942547 | -0.347624 | -1.399092 |

|   |           |           |           |
|---|-----------|-----------|-----------|
| H | -3.595819 | -2.059648 | -1.249081 |
| H | -4.821112 | -2.090297 | 0.962272  |
| H | -6.358970 | -0.209132 | 1.524461  |
| H | -4.676784 | 0.331885  | 1.540239  |
| H | -5.728151 | 0.731968  | 0.165301  |
| H | -7.105912 | -2.066961 | -0.066355 |
| H | -5.937955 | -2.851357 | -1.140920 |
| H | -6.476384 | -1.195293 | -1.470634 |

B3LYP energy = -1155.15542201 a.u.

(2R,6R,7S,8S)-1, Conf. B

|   |           |           |           |
|---|-----------|-----------|-----------|
| C | 3.199187  | -2.645533 | -0.369939 |
| C | 3.273409  | -1.222211 | -0.844092 |
| C | 3.585524  | -0.138131 | -0.113317 |
| C | 4.269018  | -0.163987 | 1.234896  |
| C | 0.857424  | -2.013394 | 0.440548  |
| C | 1.699319  | -3.068399 | -0.253643 |
| C | 1.832790  | 1.659435  | 0.161844  |
| C | 0.460904  | 1.417113  | -0.560915 |
| C | -0.334579 | 0.239012  | 0.077982  |
| C | 0.276573  | -1.071533 | -0.321711 |
| O | 1.914330  | 3.086861  | 0.423726  |
| C | 0.761168  | 3.743938  | 0.126125  |
| C | -0.196351 | 2.780972  | -0.493002 |
| O | 0.615460  | 4.924682  | 0.339083  |
| C | -1.380787 | 3.202487  | -0.947303 |
| C | 3.135895  | 1.238091  | -0.568711 |
| C | 0.853294  | -2.032852 | 1.947382  |
| O | 3.783345  | -3.580572 | -1.288850 |
| O | -1.693646 | 0.300228  | -0.451177 |
| C | -2.689636 | -0.149113 | 0.355989  |
| O | -2.503305 | -0.564303 | 1.481618  |
| C | -4.041210 | -0.012599 | -0.316412 |
| C | -5.099401 | -1.008041 | 0.191684  |
| C | -6.490798 | -0.611068 | -0.323423 |
| C | -4.751375 | -2.450265 | -0.207303 |
| H | 3.675501  | -2.755216 | 0.612199  |
| H | 2.824553  | -1.063455 | -1.825219 |
| H | 5.180194  | 0.446510  | 1.193166  |
| H | 4.555694  | -1.167616 | 1.553718  |
| H | 1.656394  | -4.033901 | 0.262576  |
| H | 1.343089  | -3.226287 | -1.277074 |
| H | 3.644518  | 0.273207  | 2.024062  |
| H | 0.642152  | 1.159014  | -1.611512 |
| H | -0.391992 | 0.367789  | 1.160143  |
| H | 0.331697  | -1.193284 | -1.403637 |
| H | -2.080766 | 2.539220  | -1.439318 |
| H | -1.649263 | 4.247778  | -0.822436 |
| H | 2.984339  | 1.268309  | -1.653117 |
| H | 1.808120  | 1.184947  | 1.148313  |
| H | 3.888907  | 1.994333  | -0.319515 |
| H | 0.173430  | -1.296963 | 2.380166  |
| H | 1.860145  | -1.863316 | 2.351304  |
| H | 0.538841  | -3.021852 | 2.302407  |
| H | 4.705798  | -3.330735 | -1.433148 |
| H | -4.374175 | 1.016933  | -0.121401 |

|   |           |           |           |
|---|-----------|-----------|-----------|
| H | -3.910148 | -0.094325 | -1.401543 |
| H | -5.103183 | -0.948791 | 1.286920  |
| H | -7.255435 | -1.299837 | 0.051529  |
| H | -6.765796 | 0.400386  | -0.002865 |
| H | -6.530616 | -0.637955 | -1.419884 |
| H | -5.498193 | -3.151282 | 0.181034  |
| H | -3.776279 | -2.752507 | 0.187200  |
| H | -4.729218 | -2.559797 | -1.299353 |

B3LYP energy = -1155.15534206 a.u.

(2R,6R,7S,8S)-1, Conf. C

|   |           |           |           |
|---|-----------|-----------|-----------|
| C | 3.043552  | -2.638578 | -0.393380 |
| C | 3.039857  | -1.255536 | -0.978686 |
| C | 3.445315  | -0.120304 | -0.384186 |
| C | 4.318104  | -0.046063 | 0.847839  |
| C | 0.827913  | -1.942766 | 0.676508  |
| C | 1.576001  | -3.048176 | -0.046053 |
| C | 1.731840  | 1.692864  | 0.007167  |
| C | 0.272522  | 1.410918  | -0.496974 |
| C | -0.419808 | 0.279163  | 0.320148  |
| C | 0.142292  | -1.057034 | -0.066109 |
| O | 1.843320  | 3.133804  | 0.161263  |
| C | 0.655590  | 3.775125  | -0.006978 |
| C | -0.375763 | 2.778547  | -0.420123 |
| O | 0.535742  | 4.967409  | 0.150175  |
| C | -1.615526 | 3.174925  | -0.724432 |
| C | 2.920887  | 1.218049  | -0.870926 |
| C | 1.030978  | -1.849783 | 2.167034  |
| O | 3.507764  | -3.641738 | -1.308778 |
| O | -1.837966 | 0.305430  | -0.022581 |
| C | -2.710535 | -0.092141 | 0.941822  |
| O | -2.368899 | -0.402076 | 2.065179  |
| C | -4.135025 | -0.088356 | 0.431138  |
| C | -4.406135 | -1.109161 | -0.700988 |
| C | -4.127077 | -2.549223 | -0.245395 |
| C | -5.848787 | -0.956010 | -1.204724 |
| H | 3.646590  | -2.673859 | 0.522284  |
| H | 2.451261  | -1.169506 | -1.892587 |
| H | 4.657586  | -1.023442 | 1.195154  |
| H | 3.811500  | 0.450875  | 1.684638  |
| H | 1.609610  | -3.972962 | 0.540625  |
| H | 1.086189  | -3.279898 | -0.997789 |
| H | 5.207631  | 0.558021  | 0.627516  |
| H | 0.304776  | 1.088272  | -1.545010 |
| H | -0.333040 | 0.481779  | 1.388849  |
| H | 0.052703  | -1.256309 | -1.134204 |
| H | -2.374942 | 2.484425  | -1.068638 |
| H | -1.870013 | 4.226565  | -0.626759 |
| H | 2.614720  | 1.166518  | -1.921380 |
| H | 1.849186  | 1.284194  | 1.016371  |
| H | 3.693679  | 1.990850  | -0.790119 |
| H | 0.783292  | -2.810634 | 2.634238  |
| H | 0.406817  | -1.086316 | 2.634592  |
| H | 2.081518  | -1.645712 | 2.412878  |
| H | 4.399099  | -3.403037 | -1.596399 |
| H | -4.781731 | -0.293704 | 1.289359  |

|   |           |           |           |
|---|-----------|-----------|-----------|
| H | -4.364398 | 0.921124  | 0.067933  |
| H | -3.726630 | -0.872016 | -1.529813 |
| H | -4.321497 | -3.255811 | -1.059606 |
| H | -3.087770 | -2.684486 | 0.071915  |
| H | -4.771072 | -2.824638 | 0.598789  |
| H | -6.049014 | -1.649488 | -2.028653 |
| H | -6.043766 | 0.059952  | -1.566457 |
| H | -6.569129 | -1.172142 | -0.405999 |

B3LYP energy = -1155.15455547 a.u.

(2R,6R,7S,8S)-1, Conf. D

|   |           |           |           |
|---|-----------|-----------|-----------|
| C | 3.996931  | -1.753130 | -0.366645 |
| C | 3.612779  | -0.369979 | -0.809828 |
| C | 3.536631  | 0.735430  | -0.048993 |
| C | 4.162615  | 0.896894  | 1.317509  |
| C | 1.557237  | -1.945752 | 0.373402  |
| C | 2.715645  | -2.645917 | -0.312911 |
| C | 1.281937  | 1.839840  | 0.204037  |
| C | 0.089264  | 1.185510  | -0.579181 |
| C | -0.302410 | -0.202110 | 0.013319  |
| C | 0.713334  | -1.230888 | -0.389518 |
| O | 0.876894  | 3.201866  | 0.510797  |
| C | -0.414324 | 3.458243  | 0.168615  |
| C | -0.974564 | 2.262615  | -0.526774 |
| O | -0.948781 | 4.516524  | 0.403667  |
| C | -2.201930 | 2.298219  | -1.054742 |
| C | 2.669310  | 1.900841  | -0.488990 |
| C | 1.527606  | -2.002081 | 1.878975  |
| O | 4.880623  | -2.417112 | -1.282172 |
| O | -1.595441 | -0.568316 | -0.555295 |
| C | -2.369697 | -1.408379 | 0.183482  |
| O | -2.054699 | -1.805944 | 1.287421  |
| C | -3.660697 | -1.745439 | -0.528606 |
| C | -4.839320 | -0.810677 | -0.141851 |
| C | -6.038835 | -1.092311 | -1.059359 |
| C | -5.230894 | -0.947123 | 1.336546  |
| H | 4.454851  | -1.731564 | 0.629945  |
| H | 3.158427  | -0.339021 | -1.800755 |
| H | 4.833472  | 1.765647  | 1.309807  |
| H | 4.746054  | 0.029155  | 1.630078  |
| H | 2.977126  | -3.588250 | 0.181316  |
| H | 2.457762  | -2.879007 | -1.351381 |
| H | 3.413986  | 1.096545  | 2.094345  |
| H | 0.383189  | 1.025158  | -1.623589 |
| H | -0.423415 | -0.128094 | 1.095493  |
| H | 0.828296  | -1.300759 | -1.471451 |
| H | -2.617966 | 1.463613  | -1.604641 |
| H | -2.801836 | 3.195646  | -0.931956 |
| H | 2.544917  | 1.916266  | -1.577176 |
| H | 1.391126  | 1.347103  | 1.175539  |
| H | 3.122010  | 2.854464  | -0.194668 |
| H | 0.633992  | -1.541627 | 2.303416  |
| H | 2.413629  | -1.520828 | 2.313579  |
| H | 1.548023  | -3.048037 | 2.208389  |
| H | 5.674137  | -1.875426 | -1.387306 |
| H | -3.493708 | -1.693077 | -1.608682 |



|   |           |           |           |
|---|-----------|-----------|-----------|
| H | -3.917412 | -2.777130 | -0.265239 |
| H | -4.515313 | 0.224510  | -0.317694 |
| H | -6.876192 | -0.428530 | -0.818439 |
| H | -5.784201 | -0.943581 | -2.114741 |
| H | -6.388796 | -2.125255 | -0.939915 |
| H | -6.040496 | -0.251345 | 1.582486  |
| H | -4.390288 | -0.742408 | 2.004919  |
| H | -5.583855 | -1.963149 | 1.552061  |

B3LYP energy = -1155.15370154 a.u.

(2R,6R,7S,8S)-1, Conf. E

|   |           |           |           |
|---|-----------|-----------|-----------|
| C | 3.740633  | -2.172039 | -0.288553 |
| C | 3.561563  | -0.765323 | -0.771180 |
| C | 3.626316  | 0.355991  | -0.035875 |
| C | 4.252542  | 0.463721  | 1.335459  |
| C | 1.269654  | -2.002878 | 0.399503  |
| C | 2.331221  | -2.869278 | -0.252041 |
| C | 1.552543  | 1.784799  | 0.160121  |
| C | 0.277493  | 1.302548  | -0.618270 |
| C | -0.305891 | -0.012497 | -0.021662 |
| C | 0.561596  | -1.179008 | -0.391609 |
| O | 1.356948  | 3.199269  | 0.433641  |
| C | 0.111236  | 3.632456  | 0.102657  |
| C | -0.626880 | 2.517197  | -0.560118 |
| O | -0.262245 | 4.760819  | 0.322522  |
| C | -1.853386 | 2.716627  | -1.052632 |
| C | 2.938191  | 1.619477  | -0.519128 |
| C | 1.197735  | -2.035993 | 1.904392  |
| O | 4.608704  | -2.870181 | -1.189396 |
| O | -1.624671 | -0.207579 | -0.616873 |
| C | -2.538454 | -0.884979 | 0.125939  |
| O | -2.336486 | -1.248957 | 1.266596  |
| C | -3.800827 | -1.149858 | -0.669340 |
| C | -5.058920 | -1.357333 | 0.191607  |
| C | -5.469309 | -0.063506 | 0.910995  |
| C | -6.207389 | -1.899558 | -0.672325 |
| H | 4.170417  | -2.184884 | 0.720175  |
| H | 3.138031  | -0.696888 | -1.773078 |
| H | 4.714113  | -0.466291 | 1.671675  |
| H | 3.531021  | 0.780118  | 2.099429  |
| H | 2.431294  | -3.833924 | 0.263969  |
| H | 2.062355  | -3.076035 | -1.293615 |
| H | 5.034915  | 1.233175  | 1.316111  |
| H | 0.541845  | 1.101149  | -1.663800 |
| H | -0.439577 | 0.091197  | 1.056360  |
| H | 0.694884  | -1.275748 | -1.469160 |
| H | -2.398983 | 1.942604  | -1.577190 |
| H | -2.318774 | 3.690066  | -0.925679 |
| H | 2.824847  | 1.618756  | -1.608616 |
| H | 1.576455  | 1.300958  | 1.142300  |
| H | 3.523257  | 2.506133  | -0.249920 |
| H | 0.367881  | -1.449668 | 2.302401  |
| H | 2.131532  | -1.675819 | 2.356012  |
| H | 1.064222  | -3.069871 | 2.245829  |
| H | 4.669054  | -3.795539 | -0.914812 |
| H | -3.945533 | -0.339778 | -1.393762 |

|   |           |           |           |
|---|-----------|-----------|-----------|
| H | -3.596841 | -2.053080 | -1.262372 |
| H | -4.812612 | -2.106808 | 0.953708  |
| H | -6.349510 | -0.231971 | 1.540814  |
| H | -4.667488 | 0.309517  | 1.555463  |
| H | -5.724160 | 0.722829  | 0.188665  |
| H | -7.102052 | -2.074220 | -0.065125 |
| H | -5.938170 | -2.847684 | -1.152008 |
| H | -6.478432 | -1.188679 | -1.463328 |

B3LYP energy = -1155.15343546 a.u.

(2R,6R,7S,8S)-1, Conf. F

|   |           |           |           |
|---|-----------|-----------|-----------|
| C | 3.222406  | -2.637711 | -0.375316 |
| C | 3.293346  | -1.216730 | -0.844840 |
| C | 3.579198  | -0.135587 | -0.102253 |
| C | 4.245390  | -0.162047 | 1.254468  |
| C | 0.859889  | -2.010488 | 0.430274  |
| C | 1.709531  | -3.055816 | -0.268172 |
| C | 1.829797  | 1.669560  | 0.162350  |
| C | 0.458597  | 1.424842  | -0.560696 |
| C | -0.332332 | 0.242351  | 0.074487  |
| C | 0.282406  | -1.064993 | -0.330053 |
| O | 1.912405  | 3.099296  | 0.413763  |
| C | 0.756478  | 3.752887  | 0.122169  |
| C | -0.203232 | 2.786416  | -0.488783 |
| O | 0.608705  | 4.933927  | 0.332762  |
| C | -1.391768 | 3.204767  | -0.935182 |
| C | 3.132971  | 1.240428  | -0.561480 |
| C | 0.850254  | -2.037983 | 1.936943  |
| O | 3.894473  | -3.476387 | -1.322691 |
| O | -1.692701 | 0.300182  | -0.452449 |
| C | -2.684593 | -0.161593 | 0.352247  |
| O | -2.493583 | -0.589482 | 1.472473  |
| C | -4.038538 | -0.020989 | -0.314550 |
| C | -5.097330 | -1.014702 | 0.195236  |
| C | -6.489647 | -0.612952 | -0.313626 |
| C | -4.754755 | -2.456984 | -0.208335 |
| H | 3.693949  | -2.746431 | 0.608738  |
| H | 2.867191  | -1.060884 | -1.835912 |
| H | 3.611593  | 0.270797  | 2.038733  |
| H | 5.155481  | 0.450610  | 1.223036  |
| H | 1.651237  | -4.025421 | 0.244901  |
| H | 1.357510  | -3.201773 | -1.295122 |
| H | 4.534912  | -1.165202 | 1.571874  |
| H | 0.641222  | 1.171186  | -1.612212 |
| H | -0.388988 | 0.366914  | 1.157180  |
| H | 0.344873  | -1.179654 | -1.412264 |
| H | -2.093603 | 2.539955  | -1.422361 |
| H | -1.661365 | 4.249649  | -0.809256 |
| H | 2.986180  | 1.268658  | -1.646616 |
| H | 1.801708  | 1.202974  | 1.152575  |
| H | 3.887944  | 1.994634  | -0.311765 |
| H | 1.852441  | -1.854325 | 2.346037  |
| H | 0.547746  | -3.032503 | 2.287309  |
| H | 0.157436  | -1.313877 | 2.368932  |
| H | 3.793400  | -4.399586 | -1.053005 |
| H | -4.368118 | 1.009087  | -0.116673 |

|   |           |           |           |
|---|-----------|-----------|-----------|
| H | -3.911526 | -0.100477 | -1.400380 |
| H | -5.096812 | -0.958103 | 1.290622  |
| H | -7.254727 | -1.300341 | 0.062943  |
| H | -6.760564 | 0.398579  | 0.010063  |
| H | -6.533823 | -0.637447 | -1.409970 |
| H | -5.501972 | -3.156881 | 0.181300  |
| H | -3.778912 | -2.762449 | 0.181830  |
| H | -4.737200 | -2.564034 | -1.300735 |

B3LYP energy = -1155.15340035 a.u.

(2R,6R,7S,8S)-1, Conf. G

|   |           |           |           |
|---|-----------|-----------|-----------|
| C | 3.750013  | -2.162393 | -0.270719 |
| C | 3.561916  | -0.755968 | -0.765277 |
| C | 3.637242  | 0.377183  | -0.048427 |
| C | 4.284923  | 0.500656  | 1.310791  |
| C | 1.279392  | -2.009495 | 0.391977  |
| C | 2.348385  | -2.871906 | -0.253405 |
| C | 1.545353  | 1.774911  | 0.155634  |
| C | 0.271423  | 1.289357  | -0.623230 |
| C | -0.308496 | -0.028316 | -0.027441 |
| C | 0.562067  | -1.192312 | -0.398188 |
| O | 1.338718  | 3.183988  | 0.445978  |
| C | 0.092085  | 3.613941  | 0.112488  |
| C | -0.636797 | 2.500848  | -0.563604 |
| O | -0.287722 | 4.738416  | 0.340358  |
| C | -1.860379 | 2.698697  | -1.063943 |
| C | 2.929858  | 1.629449  | -0.532675 |
| C | 1.211639  | -2.037852 | 1.897405  |
| O | 4.684483  | -2.938315 | -1.028439 |
| O | -1.627079 | -0.225215 | -0.621805 |
| C | -2.545100 | -0.889580 | 0.128350  |
| O | -2.345948 | -1.240481 | 1.273389  |
| C | -3.807722 | -1.158084 | -0.665222 |
| C | -5.067333 | -1.351693 | 0.196724  |
| C | -5.473111 | -0.049153 | 0.902874  |
| C | -6.217307 | -1.897948 | -0.662626 |
| H | 4.158713  | -2.166214 | 0.741432  |
| H | 3.103489  | -0.689987 | -1.754809 |
| H | 5.073028  | 1.263220  | 1.267666  |
| H | 4.744281  | -0.427633 | 1.654295  |
| H | 2.464464  | -3.836169 | 0.253557  |
| H | 2.077129  | -3.080417 | -1.296068 |
| H | 3.576169  | 0.836080  | 2.078481  |
| H | 0.535615  | 1.089166  | -1.669003 |
| H | -0.441420 | 0.074131  | 1.050747  |
| H | 0.689498  | -1.291588 | -1.476543 |
| H | -2.398864 | 1.925796  | -1.597540 |
| H | -2.331167 | 3.669115  | -0.933821 |
| H | 2.809060  | 1.623376  | -1.621470 |
| H | 1.578486  | 1.279808  | 1.131888  |
| H | 3.503684  | 2.525261  | -0.270440 |
| H | 0.377997  | -1.457287 | 2.296004  |
| H | 2.143372  | -1.668553 | 2.345859  |
| H | 1.089223  | -3.071902 | 2.241692  |
| H | 4.478403  | -2.848593 | -1.969257 |
| H | -3.948707 | -0.355150 | -1.398341 |

|   |           |           |           |
|---|-----------|-----------|-----------|
| H | -3.606750 | -2.068367 | -1.248392 |
| H | -4.824640 | -2.094506 | 0.966456  |
| H | -6.354380 | -0.208007 | 1.533671  |
| H | -4.670342 | 0.327092  | 1.544257  |
| H | -5.724536 | 0.730980  | 0.172631  |
| H | -7.112881 | -2.063425 | -0.054219 |
| H | -5.951427 | -2.851698 | -1.132919 |
| H | -6.485399 | -1.193726 | -1.460586 |

B3LYP energy = -1155.15330860 a.u.

(2R,6R,7S,8S)-1, Conf. H

|   |           |           |           |
|---|-----------|-----------|-----------|
| C | 3.207615  | -2.644797 | -0.353832 |
| C | 3.274307  | -1.225671 | -0.844854 |
| C | 3.593209  | -0.132446 | -0.133061 |
| C | 4.304688  | -0.143713 | 1.199787  |
| C | 0.852865  | -2.010046 | 0.437917  |
| C | 1.697145  | -3.064613 | -0.253580 |
| C | 1.830892  | 1.655036  | 0.150072  |
| C | 0.452953  | 1.418167  | -0.563598 |
| C | -0.341771 | 0.240869  | 0.077521  |
| C | 0.265386  | -1.071095 | -0.323119 |
| O | 1.914630  | 3.080785  | 0.420633  |
| C | 0.761004  | 3.741070  | 0.133041  |
| C | -0.201198 | 2.782985  | -0.486653 |
| O | 0.617542  | 4.920697  | 0.353384  |
| C | -1.386905 | 3.208833  | -0.933485 |
| C | 3.127876  | 1.236895  | -0.593803 |
| C | 0.863388  | -2.020866 | 1.944933  |
| O | 3.926701  | -3.584807 | -1.158911 |
| O | -1.702176 | 0.304219  | -0.447922 |
| C | -2.695747 | -0.149894 | 0.359871  |
| O | -2.505586 | -0.571348 | 1.482440  |
| C | -4.049558 | -0.010402 | -0.307314 |
| C | -5.102197 | -1.016556 | 0.191355  |
| C | -6.496417 | -0.620389 | -0.316586 |
| C | -4.748185 | -2.452496 | -0.224742 |
| H | 3.665141  | -2.735804 | 0.633084  |
| H | 2.800517  | -1.066629 | -1.816497 |
| H | 5.222660  | 0.453121  | 1.124625  |
| H | 4.589738  | -1.144921 | 1.526968  |
| H | 1.649553  | -4.032976 | 0.256566  |
| H | 1.333943  | -3.215794 | -1.278062 |
| H | 3.704374  | 0.316740  | 1.994632  |
| H | 0.625872  | 1.162509  | -1.616243 |
| H | -0.395415 | 0.369570  | 1.159869  |
| H | 0.311005  | -1.195548 | -1.405435 |
| H | -2.090471 | 2.549348  | -1.425510 |
| H | -1.652947 | 4.253956  | -0.802141 |
| H | 2.962877  | 1.258160  | -1.676586 |
| H | 1.814102  | 1.174211  | 1.133622  |
| H | 3.879112  | 1.999696  | -0.360508 |
| H | 0.568699  | -3.012344 | 2.309510  |
| H | 0.175694  | -1.292977 | 2.378748  |
| H | 1.870781  | -1.831239 | 2.338365  |
| H | 3.672057  | -3.466410 | -2.084573 |
| H | -4.386296 | 1.015096  | -0.098195 |

|   |           |           |           |
|---|-----------|-----------|-----------|
| H | -3.921435 | -0.077973 | -1.393763 |
| H | -5.104049 | -0.969836 | 1.287181  |
| H | -7.257136 | -1.316613 | 0.052481  |
| H | -6.775291 | 0.386267  | 0.015428  |
| H | -6.538431 | -0.635662 | -1.413196 |
| H | -5.491250 | -3.161355 | 0.156444  |
| H | -3.771199 | -2.754921 | 0.165015  |
| H | -4.727191 | -2.549272 | -1.318052 |

B3LYP energy = -1155.15322040 a.u.

(2R,6R,7S,8S)-1, Conf. I

|   |           |           |           |
|---|-----------|-----------|-----------|
| C | 3.783412  | -2.112538 | 0.405991  |
| C | 3.694502  | -0.600602 | 0.346545  |
| C | 3.431216  | 0.202770  | -0.698613 |
| C | 3.451240  | -0.222684 | -2.145257 |
| C | 1.237714  | -1.943031 | 0.726247  |
| C | 2.381266  | -2.788009 | 0.202985  |
| C | 1.647881  | 1.698497  | 0.341237  |
| C | 0.345992  | 1.317610  | -0.443493 |
| C | -0.301418 | 0.020869  | 0.123483  |
| C | 0.593301  | -1.151839 | -0.148247 |
| O | 1.469228  | 3.062800  | 0.806780  |
| C | 0.255313  | 3.579813  | 0.473801  |
| C | -0.497014 | 2.568031  | -0.325897 |
| O | -0.086000 | 4.693139  | 0.797482  |
| C | -1.691808 | 2.858226  | -0.849737 |
| C | 2.988878  | 1.636567  | -0.419521 |
| C | 1.013146  | -1.948156 | 2.216654  |
| O | 4.635537  | -2.719547 | -0.576232 |
| O | -1.566611 | -0.157107 | -0.580960 |
| C | -2.541703 | -0.839016 | 0.075437  |
| O | -2.436142 | -1.215937 | 1.224626  |
| C | -3.733795 | -1.088997 | -0.825888 |
| C | -5.052336 | -1.344561 | -0.076046 |
| C | -5.541243 | -0.082874 | 0.651590  |
| C | -6.119239 | -1.872760 | -1.046645 |
| H | 4.152389  | -2.380452 | 1.406235  |
| H | 3.655408  | -0.143565 | 1.336731  |
| H | 3.718497  | -1.272798 | -2.266122 |
| H | 4.178051  | 0.383861  | -2.702613 |
| H | 2.408442  | -3.778500 | 0.671270  |
| H | 2.270394  | -2.936314 | -0.875460 |
| H | 2.478331  | -0.043177 | -2.621916 |
| H | 0.584982  | 1.131497  | -1.497095 |
| H | -0.521788 | 0.146204  | 1.185088  |
| H | 0.833368  | -1.265994 | -1.204738 |
| H | -2.239843 | 2.150797  | -1.460219 |
| H | -2.130267 | 3.833728  | -0.659483 |
| H | 2.901058  | 2.209226  | -1.350089 |
| H | 1.728908  | 1.086164  | 1.243904  |
| H | 3.725310  | 2.156780  | 0.203122  |
| H | 0.910969  | -2.980442 | 2.572482  |
| H | 0.112284  | -1.406946 | 2.511039  |
| H | 1.871677  | -1.518741 | 2.751890  |
| H | 5.527854  | -2.364668 | -0.464563 |
| H | -3.832308 | -0.253017 | -1.528526 |

|   |           |           |           |
|---|-----------|-----------|-----------|
| H | -3.469786 | -1.965425 | -1.435108 |
| H | -4.854657 | -2.116295 | 0.678022  |
| H | -6.466223 | -0.286369 | 1.201966  |
| H | -4.800496 | 0.278709  | 1.371215  |
| H | -5.751197 | 0.724626  | -0.061900 |
| H | -7.056358 | -2.081092 | -0.519374 |
| H | -5.796809 | -2.799837 | -1.534532 |
| H | -6.338113 | -1.138647 | -1.832542 |

B3LYP energy = -1155.15310732 a.u.

(2R,6R,7S,8S)-1, Conf. J

|   |           |           |           |
|---|-----------|-----------|-----------|
| C | 3.340252  | -2.548536 | 0.354277  |
| C | 3.516921  | -1.045678 | 0.261943  |
| C | 3.331378  | -0.226488 | -0.787860 |
| C | 3.187649  | -0.673753 | -2.220958 |
| C | 0.883552  | -1.930035 | 0.791423  |
| C | 1.833435  | -2.968330 | 0.230786  |
| C | 1.893028  | 1.572581  | 0.301247  |
| C | 0.506203  | 1.411222  | -0.409461 |
| C | -0.330262 | 0.258135  | 0.218552  |
| C | 0.330300  | -1.057424 | -0.067998 |
| O | 1.977072  | 2.954301  | 0.741535  |
| C | 0.856680  | 3.670021  | 0.452105  |
| C | -0.098758 | 2.792423  | -0.287193 |
| O | 0.730814  | 4.831043  | 0.763389  |
| C | -1.247283 | 3.279979  | -0.766313 |
| C | 3.161029  | 1.266653  | -0.523322 |
| C | 0.748786  | -1.869837 | 2.291661  |
| O | 4.024212  | -3.311944 | -0.650378 |
| O | -1.639179 | 0.299838  | -0.424752 |
| C | -2.696444 | -0.149160 | 0.300289  |
| O | -2.601425 | -0.555385 | 1.440394  |
| C | -3.988341 | -0.023177 | -0.482657 |
| C | -5.086411 | -1.010141 | -0.048542 |
| C | -6.431086 | -0.616013 | -0.677465 |
| C | -4.711987 | -2.457889 | -0.400368 |
| H | 3.704583  | -2.861720 | 1.342971  |
| H | 3.624049  | -0.572806 | 1.239486  |
| H | 3.267247  | -1.755680 | -2.328510 |
| H | 3.970002  | -0.208719 | -2.836102 |
| H | 1.709968  | -3.942980 | 0.716800  |
| H | 1.643581  | -3.106985 | -0.837823 |
| H | 2.230965  | -0.339791 | -2.644295 |
| H | 0.655094  | 1.166479  | -1.467703 |
| H | -0.473104 | 0.435769  | 1.285982  |
| H | 0.481938  | -1.231084 | -1.132789 |
| H | -1.938858 | 2.670470  | -1.335390 |
| H | -1.497481 | 4.321097  | -0.582813 |
| H | 3.124511  | 1.831223  | -1.462271 |
| H | 1.917040  | 0.970565  | 1.214218  |
| H | 4.008228  | 1.659974  | 0.049495  |
| H | 1.694793  | -1.577298 | 2.768355  |
| H | 0.500634  | -2.864442 | 2.681418  |
| H | -0.033279 | -1.182807 | 2.619237  |
| H | 4.967722  | -3.108701 | -0.594805 |
| H | -4.334610 | 1.009353  | -0.331378 |

|   |           |           |           |
|---|-----------|-----------|-----------|
| H | -3.768565 | -0.120466 | -1.552108 |
| H | -5.177409 | -0.937308 | 1.042121  |
| H | -7.225288 | -1.299385 | -0.358223 |
| H | -6.728060 | 0.399244  | -0.390132 |
| H | -6.382873 | -0.653668 | -1.773302 |
| H | -5.489647 | -3.152486 | -0.064595 |
| H | -3.772741 | -2.756519 | 0.075397  |
| H | -4.602244 | -2.581463 | -1.485607 |

B3LYP energy = -1155.15308611 a.u.

(2R,6R,7S,8S)-1, Conf. K

|   |           |           |           |
|---|-----------|-----------|-----------|
| C | 3.504603  | -2.363978 | -0.272707 |
| C | 3.465599  | -0.925657 | -0.703466 |
| C | 3.592650  | 0.161456  | 0.076847  |
| C | 4.157854  | 0.165254  | 1.478984  |
| C | 1.039464  | -2.018659 | 0.310093  |
| C | 2.056909  | -2.949604 | -0.323642 |
| C | 1.626569  | 1.734533  | 0.238790  |
| C | 0.361738  | 1.385524  | -0.622815 |
| C | -0.357489 | 0.102765  | -0.107444 |
| C | 0.433328  | -1.116537 | -0.480162 |
| O | 1.523381  | 3.145733  | 0.570772  |
| C | 0.337733  | 3.691795  | 0.187912  |
| C | -0.442997 | 2.667856  | -0.566673 |
| O | 0.041925  | 4.836893  | 0.436813  |
| C | -1.615001 | 2.985877  | -1.125152 |
| C | 3.028956  | 1.493850  | -0.382238 |
| C | 0.893479  | -2.096076 | 1.808229  |
| O | 4.279207  | -3.198056 | -1.146823 |
| O | -1.653791 | 0.038024  | -0.772824 |
| C | -2.670000 | -0.553253 | -0.087139 |
| O | -2.558196 | -0.948106 | 1.055089  |
| C | -3.908252 | -0.638295 | -0.960076 |
| C | -5.208135 | -1.116946 | -0.282156 |
| C | -5.132483 | -2.579012 | 0.187697  |
| C | -5.663445 | -0.175882 | 0.845003  |
| H | 3.887460  | -2.454602 | 0.751243  |
| H | 3.090146  | -0.783694 | -1.717446 |
| H | 4.999699  | 0.867773  | 1.529758  |
| H | 4.521234  | -0.812558 | 1.800123  |
| H | 2.069921  | -3.933634 | 0.158147  |
| H | 1.823499  | -3.104815 | -1.382257 |
| H | 3.426646  | 0.511995  | 2.219992  |
| H | 0.666221  | 1.197356  | -1.659762 |
| H | -0.536843 | 0.179564  | 0.966167  |
| H | 0.606418  | -1.189304 | -1.554041 |
| H | -2.183672 | 2.279037  | -1.716108 |
| H | -2.009618 | 3.988337  | -0.985355 |
| H | 2.969588  | 1.546008  | -1.474716 |
| H | 1.566487  | 1.206739  | 1.196123  |
| H | 3.663997  | 2.321310  | -0.046146 |
| H | 0.650655  | -3.124528 | 2.102196  |
| H | 0.103596  | -1.448802 | 2.193277  |
| H | 1.834596  | -1.842201 | 2.313781  |
| H | 5.176858  | -2.842526 | -1.191162 |
| H | -4.057764 | 0.352045  | -1.408066 |

|   |           |           |           |
|---|-----------|-----------|-----------|
| H | -3.651823 | -1.301523 | -1.797541 |
| H | -5.969037 | -1.069020 | -1.074588 |
| H | -6.110756 | -2.912894 | 0.551056  |
| H | -4.838891 | -3.245240 | -0.632484 |
| H | -4.409198 | -2.696855 | 0.998970  |
| H | -6.646312 | -0.479095 | 1.222023  |
| H | -5.749543 | 0.858415  | 0.490749  |
| H | -4.960256 | -0.193270 | 1.682543  |

B3LYP energy = -1155.15294253 a.u.

(2R,6R,7S,8S)-1, Conf. L

|   |           |           |           |
|---|-----------|-----------|-----------|
| C | 2.707896  | -2.903446 | -0.305421 |
| C | 2.933797  | -1.516081 | -0.834648 |
| C | 3.401333  | -0.453519 | -0.157105 |
| C | 4.130734  | -0.517504 | 1.165512  |
| C | 0.490109  | -1.967694 | 0.556689  |
| C | 1.173313  | -3.137501 | -0.127136 |
| C | 1.886165  | 1.548516  | 0.115802  |
| C | 0.465844  | 1.456427  | -0.547022 |
| C | -0.438092 | 0.400048  | 0.156558  |
| C | -0.000558 | -0.985583 | -0.218367 |
| O | 2.151508  | 2.961748  | 0.327042  |
| C | 1.073445  | 3.746114  | 0.056864  |
| C | -0.019727 | 2.890857  | -0.491552 |
| O | 1.080587  | 4.940954  | 0.238639  |
| C | -1.165536 | 3.441225  | -0.905179 |
| C | 3.098713  | 0.950480  | -0.647113 |
| C | 0.539037  | -1.939620 | 2.062730  |
| O | 3.143006  | -3.932584 | -1.206227 |
| O | -1.799743 | 0.606516  | -0.326476 |
| C | -2.808668 | 0.292535  | 0.529731  |
| O | -2.622188 | -0.088620 | 1.668412  |
| C | -4.167309 | 0.474235  | -0.113161 |
| C | -4.867985 | -0.859767 | -0.498101 |
| C | -4.040277 | -1.675351 | -1.502925 |
| C | -5.257757 | -1.700267 | 0.726783  |
| H | 3.200920  | -3.037211 | 0.665396  |
| H | 2.467986  | -1.337073 | -1.804329 |
| H | 5.109366  | -0.030549 | 1.065707  |
| H | 4.301010  | -1.537373 | 1.514577  |
| H | 1.033242  | -4.074478 | 0.423415  |
| H | 0.764234  | -3.282268 | -1.132602 |
| H | 3.599793  | 0.024629  | 1.957954  |
| H | 0.571453  | 1.154223  | -1.596427 |
| H | -0.439673 | 0.567113  | 1.235089  |
| H | 0.003264  | -1.144643 | -1.296900 |
| H | -1.962922 | 2.855532  | -1.344658 |
| H | -1.301533 | 4.513831  | -0.798946 |
| H | 2.906765  | 0.963024  | -1.725442 |
| H | 1.842968  | 1.108251  | 1.117539  |
| H | 3.945442  | 1.619157  | -0.454945 |
| H | 1.573285  | -1.876982 | 2.426069  |
| H | 0.124811  | -2.872870 | 2.463255  |
| H | -0.033406 | -1.115074 | 2.490965  |
| H | 4.082178  | -3.799038 | -1.391298 |
| H | -4.792075 | 1.009596  | 0.609619  |

|   |           |           |           |
|---|-----------|-----------|-----------|
| H | -4.060433 | 1.096222  | -1.006393 |
| H | -5.796358 | -0.553861 | -1.000370 |
| H | -4.602383 | -2.553133 | -1.839406 |
| H | -3.780508 | -1.082468 | -2.387058 |
| H | -3.106438 | -2.032893 | -1.053845 |
| H | -5.826604 | -2.582955 | 0.414009  |
| H | -5.880489 | -1.126605 | 1.422007  |
| H | -4.376110 | -2.040853 | 1.278256  |

B3LYP energy = -1155.15276488 a.u.

(2R,6R,7S,8S)-1, Conf. M

|   |           |           |           |
|---|-----------|-----------|-----------|
| C | 3.062817  | -2.628197 | -0.401237 |
| C | 3.049114  | -1.250029 | -0.988092 |
| C | 3.438804  | -0.113613 | -0.389110 |
| C | 4.310887  | -0.033015 | 0.842778  |
| C | 0.833331  | -1.935393 | 0.678644  |
| C | 1.584303  | -3.034372 | -0.049712 |
| C | 1.725506  | 1.703050  | 0.000870  |
| C | 0.263122  | 1.418116  | -0.492664 |
| C | -0.420055 | 0.283581  | 0.327074  |
| C | 0.144730  | -1.050499 | -0.062101 |
| O | 1.836862  | 3.145691  | 0.143617  |
| C | 0.646405  | 3.783814  | -0.011742 |
| C | -0.388513 | 2.783825  | -0.408584 |
| O | 0.525201  | 4.976446  | 0.142709  |
| C | -1.633354 | 3.177139  | -0.695607 |
| C | 2.909093  | 1.221368  | -0.879575 |
| C | 1.042162  | -1.842625 | 2.168351  |
| O | 3.605390  | -3.541783 | -1.362080 |
| O | -1.840245 | 0.303787  | -0.008852 |
| C | -2.704373 | -0.118004 | 0.952364  |
| O | -2.354242 | -0.446685 | 2.067862  |
| C | -4.132026 | -0.114064 | 0.450089  |
| C | -4.401423 | -1.107369 | -0.706503 |
| C | -4.107791 | -2.556323 | -0.289879 |
| C | -5.848242 | -0.953749 | -1.198009 |
| H | 3.667130  | -2.655626 | 0.513361  |
| H | 2.469684  | -1.171403 | -1.907813 |
| H | 4.661876  | -1.008001 | 1.185108  |
| H | 3.802585  | 0.458236  | 1.682103  |
| H | 1.607335  | -3.960482 | 0.540695  |
| H | 1.092027  | -3.259724 | -1.002017 |
| H | 5.195262  | 0.577781  | 0.620566  |
| H | 0.289362  | 1.097901  | -1.541684 |
| H | -0.328905 | 0.486027  | 1.395484  |
| H | 0.054479  | -1.248137 | -1.130352 |
| H | -2.396386 | 2.484926  | -1.028094 |
| H | -1.888108 | 4.228531  | -0.595906 |
| H | 2.598069  | 1.163718  | -1.928312 |
| H | 1.848188  | 1.302589  | 1.012806  |
| H | 3.682538  | 1.994473  | -0.808021 |
| H | 2.090096  | -1.620852 | 2.409672  |
| H | 0.810928  | -2.807306 | 2.636373  |
| H | 0.407470  | -1.089742 | 2.638748  |
| H | 3.552921  | -4.439846 | -1.007066 |
| H | -4.771686 | -0.346814 | 1.306585  |

|   |           |           |           |
|---|-----------|-----------|-----------|
| H | -4.372083 | 0.902522  | 0.114624  |
| H | -3.728861 | -0.843221 | -1.532795 |
| H | -4.301087 | -3.243308 | -1.121012 |
| H | -3.065545 | -2.690622 | 0.018245  |
| H | -4.744664 | -2.858750 | 0.550452  |
| H | -6.047756 | -1.628294 | -2.037680 |
| H | -6.053412 | 0.069164  | -1.533462 |
| H | -6.562177 | -1.195252 | -0.400792 |

B3LYP energy = -1155.15260227 a.u.

(2R,6R,7S,8S)-1, Conf. N

|   |           |           |           |
|---|-----------|-----------|-----------|
| C | 3.651075  | -2.241431 | -0.166429 |
| C | 3.491866  | -0.787909 | -0.540020 |
| C | 3.649041  | 0.291266  | 0.242431  |
| C | 4.256187  | 0.259883  | 1.624537  |
| C | 1.111337  | -2.057737 | 0.128701  |
| C | 2.368574  | -2.789082 | 0.556083  |
| C | 1.647266  | 1.840475  | 0.391210  |
| C | 0.461484  | 1.142485  | -0.361260 |
| C | -0.256673 | 0.095478  | 0.544339  |
| C | 0.685503  | -1.034739 | 0.891851  |
| O | 1.371161  | 3.266323  | 0.372549  |
| C | 0.217028  | 3.572405  | -0.281824 |
| C | -0.391848 | 2.311296  | -0.798057 |
| O | -0.180502 | 4.707817  | -0.396268 |
| C | -1.488033 | 2.341202  | -1.562212 |
| C | 3.064517  | 1.624187  | -0.189234 |
| C | 0.546537  | -2.464416 | -1.210130 |
| O | 3.846649  | -3.052007 | -1.336903 |
| O | -1.442220 | -0.350720 | -0.161814 |
| C | -2.515757 | -0.703973 | 0.597699  |
| O | -2.537102 | -0.617531 | 1.807046  |
| C | -3.637482 | -1.245149 | -0.265371 |
| C | -5.039833 | -1.079342 | 0.346674  |
| C | -5.449679 | 0.399229  | 0.423016  |
| C | -6.065349 | -1.898031 | -0.451444 |
| H | 4.499060  | -2.390442 | 0.515575  |
| H | 3.029841  | -0.645593 | -1.517267 |
| H | 3.518170  | 0.515372  | 2.396834  |
| H | 5.056910  | 1.005650  | 1.704496  |
| H | 2.515631  | -2.668168 | 1.633969  |
| H | 2.320384  | -3.863054 | 0.343012  |
| H | 4.675902  | -0.715144 | 1.881652  |
| H | 0.845503  | 0.605953  | -1.234896 |
| H | -0.592301 | 0.583345  | 1.463733  |
| H | 1.191468  | -0.884674 | 1.844174  |
| H | -1.928605 | 1.440761  | -1.973419 |
| H | -1.956548 | 3.296637  | -1.780699 |
| H | 3.018805  | 1.700841  | -1.281522 |
| H | 1.644613  | 1.562360  | 1.449768  |
| H | 3.682866  | 2.454119  | 0.171686  |
| H | 1.343625  | -2.521569 | -1.959996 |
| H | -0.242179 | -1.800171 | -1.561675 |
| H | 0.128907  | -3.477934 | -1.138961 |
| H | 4.625730  | -2.727741 | -1.808875 |
| H | -3.582231 | -0.784603 | -1.258496 |

|   |           |           |           |
|---|-----------|-----------|-----------|
| H | -3.416241 | -2.312249 | -0.411064 |
| H | -4.997697 | -1.474239 | 1.369085  |
| H | -4.744030 | 0.981989  | 1.022946  |
| H | -5.499211 | 0.844563  | -0.579209 |
| H | -6.439142 | 0.504602  | 0.880902  |
| H | -7.064356 | -1.804497 | -0.012328 |
| H | -5.806049 | -2.962889 | -0.468877 |
| H | -6.127296 | -1.550872 | -1.490790 |

B3LYP energy = -1155.15257557 a.u.

(2R,6R,7S,8S)-1, Conf. O

|   |           |           |           |
|---|-----------|-----------|-----------|
| C | 2.957775  | -2.840985 | -0.251443 |
| C | 3.176375  | -1.382813 | -0.574488 |
| C | 3.578219  | -0.403260 | 0.250340  |
| C | 4.131496  | -0.632620 | 1.636370  |
| C | 0.545934  | -2.026756 | 0.048310  |
| C | 1.572063  | -3.066796 | 0.452434  |
| C | 2.028974  | 1.595239  | 0.445335  |
| C | 0.712883  | 1.243434  | -0.330963 |
| C | -0.251720 | 0.380102  | 0.538296  |
| C | 0.374198  | -0.960341 | 0.850418  |
| O | 2.122751  | 3.044766  | 0.471060  |
| C | 1.087262  | 3.652915  | -0.170173 |
| C | 0.182757  | 2.603549  | -0.725330 |
| O | 0.989535  | 4.855000  | -0.246840 |
| C | -0.868117 | 2.933415  | -1.482612 |
| C | 3.352724  | 1.046537  | -0.137478 |
| C | -0.079675 | -2.225172 | -1.310328 |
| O | 2.949621  | -3.634814 | -1.449285 |
| O | -1.505795 | 0.269016  | -0.182663 |
| C | -2.636411 | 0.152706  | 0.566473  |
| O | -2.634542 | 0.127488  | 1.778861  |
| C | -3.869973 | 0.109369  | -0.313170 |
| C | -5.082534 | -0.578717 | 0.338372  |
| C | -6.349408 | -0.313894 | -0.488430 |
| C | -4.842667 | -2.085267 | 0.520612  |
| H | 3.733867  | -3.224620 | 0.424492  |
| H | 2.784872  | -1.098523 | -1.551659 |
| H | 4.301607  | -1.689152 | 1.854988  |
| H | 3.460344  | -0.239205 | 2.411581  |
| H | 1.736169  | -3.020224 | 1.533618  |
| H | 1.254350  | -4.086083 | 0.204849  |
| H | 5.085090  | -0.103628 | 1.756418  |
| H | 0.957004  | 0.659929  | -1.224755 |
| H | -0.461692 | 0.907390  | 1.473211  |
| H | 0.879684  | -0.978258 | 1.814454  |
| H | -1.519184 | 2.186331  | -1.920672 |
| H | -1.079767 | 3.982723  | -1.667918 |
| H | 3.340436  | 1.166796  | -1.226730 |
| H | 1.944198  | 1.295182  | 1.494535  |
| H | 4.155526  | 1.682285  | 0.253456  |
| H | 0.689148  | -2.456438 | -2.056058 |
| H | -0.666462 | -1.368439 | -1.639681 |
| H | -0.744244 | -3.099408 | -1.283185 |
| H | 3.790807  | -3.507705 | -1.908799 |
| H | -4.113725 | 1.156120  | -0.545054 |

|   |           |           |           |
|---|-----------|-----------|-----------|
| H | -3.612807 | -0.363698 | -1.268105 |
| H | -5.215162 | -0.132705 | 1.331628  |
| H | -6.552234 | 0.759236  | -0.582064 |
| H | -6.256765 | -0.727283 | -1.500927 |
| H | -7.223653 | -0.779331 | -0.020812 |
| H | -5.701300 | -2.558947 | 1.008796  |
| H | -3.961163 | -2.279139 | 1.139433  |
| H | -4.698438 | -2.578718 | -0.449367 |

B3LYP energy = -1155.15250379 a.u.

(2R,6R,7S,8S)-1, Conf. P

|   |           |           |           |
|---|-----------|-----------|-----------|
| C | 3.075652  | -2.620998 | -0.381637 |
| C | 3.057494  | -1.240773 | -0.976018 |
| C | 3.454184  | -0.097831 | -0.393187 |
| C | 4.339482  | -0.010762 | 0.827963  |
| C | 0.834607  | -1.943878 | 0.662622  |
| C | 1.595879  | -3.039693 | -0.060306 |
| C | 1.720703  | 1.695267  | 0.002994  |
| C | 0.261200  | 1.409609  | -0.499362 |
| C | -0.425252 | 0.272255  | 0.315002  |
| C | 0.141197  | -1.060651 | -0.076108 |
| O | 1.824877  | 3.135649  | 0.167476  |
| C | 0.634637  | 3.772790  | 0.002828  |
| C | -0.392603 | 2.774162  | -0.416006 |
| O | 0.509183  | 4.963577  | 0.166536  |
| C | -1.633777 | 3.166981  | -0.719078 |
| C | 2.909625  | 1.231881  | -0.881635 |
| C | 1.042656  | -1.850591 | 2.152679  |
| O | 3.699916  | -3.613038 | -1.203120 |
| O | -1.844316 | 0.294664  | -0.024093 |
| C | -2.712707 | -0.109487 | 0.941566  |
| O | -2.366073 | -0.425851 | 2.061511  |
| C | -4.139376 | -0.103823 | 0.437058  |
| C | -4.415333 | -1.119554 | -0.698425 |
| C | -4.134001 | -2.561608 | -0.250557 |
| C | -5.860318 | -0.964509 | -1.194877 |
| H | 3.655191  | -2.638214 | 0.543233  |
| H | 2.452579  | -1.154055 | -1.881690 |
| H | 5.228332  | 0.586805  | 0.588431  |
| H | 4.683136  | -0.984838 | 1.179723  |
| H | 1.626416  | -3.971356 | 0.515339  |
| H | 1.106129  | -3.261619 | -1.017053 |
| H | 3.844033  | 0.498792  | 1.664002  |
| H | 0.292466  | 1.091161  | -1.548749 |
| H | -0.336437 | 0.471353  | 1.384161  |
| H | 0.049050  | -1.257071 | -1.144762 |
| H | -2.390309 | 2.475171  | -1.067058 |
| H | -1.892571 | 4.217083  | -0.616315 |
| H | 2.597187  | 1.172902  | -1.930009 |
| H | 1.843118  | 1.279759  | 1.008753  |
| H | 3.673648  | 2.013983  | -0.809678 |
| H | 0.817150  | -2.817143 | 2.619099  |
| H | 0.404570  | -1.100962 | 2.623723  |
| H | 2.089405  | -1.624145 | 2.394853  |
| H | 3.335056  | -3.556570 | -2.097212 |
| H | -4.782220 | -0.313365 | 1.297149  |

|   |           |           |           |
|---|-----------|-----------|-----------|
| H | -4.370626 | 0.907200  | 0.079495  |
| H | -3.739661 | -0.878367 | -1.529283 |
| H | -4.332339 | -3.264676 | -1.066934 |
| H | -3.093295 | -2.698087 | 0.061717  |
| H | -4.774049 | -2.840866 | 0.595316  |
| H | -6.064487 | -1.654683 | -2.020621 |
| H | -6.056993 | 0.052890  | -1.551549 |
| H | -6.576869 | -1.183823 | -0.393646 |

B3LYP energy = -1155.15242755 a.u.

(2S,6R,7S,8S)-1, Conf. A

|   |           |           |           |
|---|-----------|-----------|-----------|
| C | -3.836599 | -2.079490 | 0.123347  |
| C | -3.699888 | -0.582079 | 0.000711  |
| C | -3.408741 | 0.315459  | 0.955223  |
| C | -3.409236 | 0.019987  | 2.433663  |
| C | -1.323283 | -1.993837 | -0.460983 |
| C | -2.435728 | -2.789265 | 0.193781  |
| C | -1.644495 | 1.670137  | -0.301317 |
| C | -0.312172 | 1.314995  | 0.441277  |
| C | 0.286496  | -0.029205 | -0.066831 |
| C | -0.610154 | -1.166122 | 0.322745  |
| O | -1.460006 | 2.988644  | -0.882119 |
| C | -0.222967 | 3.502513  | -0.642231 |
| C | 0.545013  | 2.537462  | 0.199300  |
| O | 0.124251  | 4.580573  | -1.064037 |
| C | 1.764438  | 2.843196  | 0.652866  |
| C | -2.939031 | 1.706131  | 0.536960  |
| C | -1.206419 | -2.094840 | -1.959299 |
| O | -4.512073 | -2.622261 | -1.021919 |
| O | 1.577359  | -0.181579 | 0.596729  |
| C | 2.528557  | -0.894506 | -0.061781 |
| O | 2.383163  | -1.325185 | -1.187168 |
| C | 3.753498  | -1.102914 | 0.805929  |
| C | 5.057968  | -1.309533 | 0.016484  |
| C | 5.474063  | -0.031794 | -0.727989 |
| C | 6.173737  | -1.792443 | 0.955106  |
| H | -4.388970 | -2.360713 | 1.030648  |
| H | -3.660136 | -0.252607 | -1.038539 |
| H | -4.019413 | 0.757772  | 2.969962  |
| H | -2.396980 | 0.091272  | 2.854395  |
| H | -2.562796 | -3.776917 | -0.262849 |
| H | -2.194833 | -2.938096 | 1.251276  |
| H | -3.798820 | -0.973670 | 2.667551  |
| H | -0.500958 | 1.202542  | 1.515513  |
| H | 0.463574  | 0.019768  | -1.142629 |
| H | -0.780695 | -1.217521 | 1.398525  |
| H | 2.326091  | 2.172610  | 1.291908  |
| H | 2.209736  | 3.793848  | 0.373598  |
| H | -2.779962 | 2.345639  | 1.413084  |
| H | -1.791906 | 0.993693  | -1.147338 |
| H | -3.698280 | 2.201075  | -0.079339 |
| H | -0.364551 | -1.527806 | -2.360287 |
| H | -2.131254 | -1.767463 | -2.450530 |
| H | -1.067387 | -3.144441 | -2.245175 |
| H | -5.376412 | -2.196265 | -1.101638 |

|   |          |           |           |
|---|----------|-----------|-----------|
| H | 3.843232 | -0.266099 | 1.508325  |
| H | 3.539582 | -1.991500 | 1.417220  |
| H | 4.867095 | -2.090735 | -0.729467 |
| H | 6.388328 | -0.200167 | -1.307290 |
| H | 4.697380 | 0.298526  | -1.424578 |
| H | 5.674296 | 0.785592  | -0.023014 |
| H | 7.101790 | -1.965871 | 0.399892  |
| H | 5.902760 | -2.729599 | 1.454883  |
| H | 6.387598 | -1.047524 | 1.732231  |

B3LYP energy = -1155.15499413 a.u.

(2S,6R,7S,8S)-1, Conf. B

|   |           |           |           |
|---|-----------|-----------|-----------|
| C | -3.223395 | -2.651700 | 0.170194  |
| C | -3.430587 | -1.158471 | 0.105460  |
| C | -3.271104 | -0.246044 | 1.076866  |
| C | -3.096447 | -0.576221 | 2.537615  |
| C | -0.838734 | -1.990772 | -0.567185 |
| C | -1.699036 | -3.031238 | 0.122803  |
| C | -1.947486 | 1.505974  | -0.231098 |
| C | -0.517762 | 1.436205  | 0.404858  |
| C | 0.321851  | 0.271620  | -0.195486 |
| C | -0.274461 | -1.044925 | 0.203793  |
| O | -2.103886 | 2.849981  | -0.759672 |
| C | -0.995568 | 3.619170  | -0.582300 |
| C | 0.029521  | 2.824694  | 0.157613  |
| O | -0.928463 | 4.759825  | -0.976075 |
| C | 1.184958  | 3.379985  | 0.535899  |
| C | -3.151628 | 1.225866  | 0.691527  |
| C | -0.807210 | -2.022814 | -2.072713 |
| O | -3.840181 | -3.297622 | -0.954507 |
| O | 1.659155  | 0.392155  | 0.377556  |
| C | 2.693734  | -0.074965 | -0.368605 |
| O | 2.559071  | -0.546000 | -1.479210 |
| C | 4.017574  | 0.113186  | 0.345662  |
| C | 5.060980  | -0.970977 | 0.017482  |
| C | 6.438212  | -0.562833 | 0.560758  |
| C | 4.635149  | -2.343464 | 0.561096  |
| H | -3.635138 | -3.076127 | 1.096349  |
| H | -3.543335 | -0.798798 | -0.918286 |
| H | -2.100335 | -0.283895 | 2.896903  |
| H | -3.229767 | -1.639407 | 2.751244  |
| H | -1.636420 | -4.009950 | -0.365176 |
| H | -1.356977 | -3.150301 | 1.156030  |
| H | -3.819789 | -0.016024 | 3.143734  |
| H | -0.597638 | 1.257748  | 1.483723  |
| H | 0.405700  | 0.385157  | -1.277756 |
| H | -0.355419 | -1.159790 | 1.285063  |
| H | 1.928771  | 2.833364  | 1.102960  |
| H | 1.387424  | 4.413374  | 0.268864  |
| H | -3.072253 | 1.858065  | 1.583709  |
| H | -2.004699 | 0.841079  | -1.097375 |
| H | -4.045109 | 1.557467  | 0.150223  |
| H | -0.473581 | -3.010950 | -2.411597 |
| H | -0.131029 | -1.280095 | -2.499504 |
| H | -1.811731 | -1.882387 | -2.491309 |
| H | -4.781005 | -3.074690 | -0.961234 |

|   |          |           |           |
|---|----------|-----------|-----------|
| H | 4.395607 | 1.096648  | 0.032164  |
| H | 3.839265 | 0.175469  | 1.424924  |
| H | 5.123710 | -1.041432 | -1.075283 |
| H | 7.193135 | -1.316871 | 0.313298  |
| H | 6.770397 | 0.393246  | 0.140201  |
| H | 6.418779 | -0.460129 | 1.653301  |
| H | 5.374705 | -3.109201 | 0.302961  |
| H | 3.672745 | -2.659990 | 0.146618  |
| H | 4.547053 | -2.321951 | 1.655084  |

B3LYP energy = -1155.15492805 a.u.

(2S,6R,7S,8S)-1, Conf. C

|   |           |           |           |
|---|-----------|-----------|-----------|
| C | -3.185860 | -2.545790 | 0.230233  |
| C | -3.334097 | -1.045539 | 0.263750  |
| C | -3.050980 | -0.193351 | 1.261380  |
| C | -2.755364 | -0.609079 | 2.680311  |
| C | -0.873459 | -1.931609 | -0.742754 |
| C | -1.693682 | -2.977829 | -0.012778 |
| C | -1.806359 | 1.581250  | -0.095616 |
| C | -0.317207 | 1.428683  | 0.366000  |
| C | 0.397667  | 0.274509  | -0.394762 |
| C | -0.197912 | -1.042011 | 0.005903  |
| O | -1.967989 | 2.956200  | -0.535006 |
| C | -0.818512 | 3.678659  | -0.442679 |
| C | 0.251764  | 2.810527  | 0.132067  |
| O | -0.752635 | 4.837547  | -0.779069 |
| C | 1.463578  | 3.304094  | 0.404163  |
| C | -2.910230 | 1.292703  | 0.942350  |
| C | -0.998120 | -1.892655 | -2.243158 |
| O | -3.953179 | -3.106656 | -0.846435 |
| O | 1.800286  | 0.318405  | 0.004764  |
| C | 2.713954  | -0.114368 | -0.905034 |
| O | 2.421688  | -0.470527 | -2.028267 |
| C | 4.115374  | -0.086061 | -0.334300 |
| C | 4.341436  | -1.072690 | 0.837375  |
| C | 4.087623  | -2.526680 | 0.412116  |
| C | 5.760139  | -0.898353 | 1.398815  |
| H | -3.506846 | -3.005143 | 1.175346  |
| H | -3.526330 | -0.627040 | -0.725145 |
| H | -1.714455 | -0.386941 | 2.952903  |
| H | -2.926247 | -1.674062 | 2.854503  |
| H | -1.728108 | -3.928991 | -0.554936 |
| H | -1.242730 | -3.167190 | 0.966710  |
| H | -3.384865 | -0.046585 | 3.381425  |
| H | -0.278069 | 1.189816  | 1.435502  |
| H | 0.349405  | 0.447516  | -1.471198 |
| H | -0.171894 | -1.206551 | 1.083520  |
| H | 2.243574  | 2.699577  | 0.851249  |
| H | 1.677018  | 4.343484  | 0.171429  |
| H | -2.704866 | 1.869389  | 1.851798  |
| H | -1.984722 | 0.965242  | -0.981072 |
| H | -3.843479 | 1.688164  | 0.525024  |
| H | -0.350266 | -1.145428 | -2.704595 |
| H | -2.036627 | -1.713166 | -2.548146 |
| H | -0.725969 | -2.870628 | -2.658290 |
| H | -4.877352 | -2.844432 | -0.736584 |

|   |          |           |           |
|---|----------|-----------|-----------|
| H | 4.799395 | -0.312559 | -1.157560 |
| H | 4.324159 | 0.934349  | 0.009863  |
| H | 3.625755 | -0.814778 | 1.628782  |
| H | 4.249576 | -3.208674 | 1.254056  |
| H | 3.063695 | -2.675927 | 0.053768  |
| H | 4.768564 | -2.822972 | -0.395163 |
| H | 5.926100 | -1.566162 | 2.251151  |
| H | 5.936097 | 0.128783  | 1.738053  |
| H | 6.515607 | -1.135307 | 0.639410  |

B3LYP energy = -1155.15408544 a.u.

(2S,6R,7S,8S)-1, Conf. D

|   |           |           |           |
|---|-----------|-----------|-----------|
| C | -3.871403 | -2.051374 | 0.090306  |
| C | -3.729980 | -0.556163 | -0.010936 |
| C | -3.401442 | 0.318756  | 0.950053  |
| C | -3.370441 | -0.000626 | 2.423451  |
| C | -1.338183 | -1.990662 | -0.418235 |
| C | -2.465397 | -2.756315 | 0.243374  |
| C | -1.637131 | 1.678118  | -0.294267 |
| C | -0.304503 | 1.319187  | 0.447423  |
| C | 0.284013  | -0.032865 | -0.051157 |
| C | -0.617491 | -1.159982 | 0.355402  |
| O | -1.449703 | 2.998557  | -0.870870 |
| C | -0.208566 | 3.504407  | -0.640096 |
| C | 0.560288  | 2.534344  | 0.195253  |
| O | 0.142967  | 4.580754  | -1.063195 |
| C | 1.785669  | 2.832617  | 0.637602  |
| C | -2.933190 | 1.712264  | 0.541626  |
| C | -1.221212 | -2.109223 | -1.915456 |
| O | -4.539651 | -2.460869 | -1.110152 |
| O | 1.578967  | -0.187497 | 0.604372  |
| C | 2.517806  | -0.917311 | -0.052561 |
| O | 2.356639  | -1.366454 | -1.168799 |
| C | 3.752851  | -1.118901 | 0.802341  |
| C | 5.050079  | -1.312384 | -0.002791 |
| C | 5.446350  | -0.028959 | -0.748291 |
| C | 6.180844  | -1.788397 | 0.921204  |
| H | -4.477772 | -2.341511 | 0.960358  |
| H | -3.743546 | -0.210883 | -1.044417 |
| H | -2.355281 | 0.084434  | 2.834010  |
| H | -3.739648 | -1.004613 | 2.647130  |
| H | -2.557050 | -3.774545 | -0.158169 |
| H | -2.258867 | -2.848642 | 1.315326  |
| H | -3.989165 | 0.715519  | 2.979284  |
| H | -0.491849 | 1.217052  | 1.522966  |
| H | 0.453779  | 0.004884  | -1.128536 |
| H | -0.786657 | -1.195858 | 1.431652  |
| H | 2.348897  | 2.159528  | 1.272541  |
| H | 2.234090  | 3.780265  | 0.353138  |
| H | -2.775989 | 2.348331  | 1.420694  |
| H | -1.785812 | 1.004405  | -1.142652 |
| H | -3.690680 | 2.208643  | -0.075336 |
| H | -1.108195 | -3.164712 | -2.192544 |
| H | -0.361755 | -1.570041 | -2.317197 |
| H | -2.134691 | -1.758810 | -2.411740 |
| H | -4.707638 | -3.411183 | -1.069355 |



|   |          |           |           |
|---|----------|-----------|-----------|
| H | 3.843912 | -0.284100 | 1.506747  |
| H | 3.553034 | -2.012129 | 1.411627  |
| H | 4.856852 | -2.093137 | -0.748608 |
| H | 6.354713 | -0.187830 | -1.339416 |
| H | 4.658510 | 0.297290  | -1.434284 |
| H | 5.648339 | 0.787968  | -0.043346 |
| H | 7.103729 | -1.952185 | 0.354543  |
| H | 5.923784 | -2.729322 | 1.421265  |
| H | 6.397446 | -1.043952 | 1.697990  |

B3LYP energy = -1155.15367498 a.u.

(2S,6R,7S,8S)-1, Conf. E

|   |           |           |           |
|---|-----------|-----------|-----------|
| C | -3.051923 | -2.694797 | -0.049435 |
| C | -3.358899 | -1.237901 | -0.264640 |
| C | -3.378876 | -0.253628 | 0.651659  |
| C | -3.387856 | -0.457879 | 2.148211  |
| C | -0.610069 | -2.006860 | -0.153836 |
| C | -1.634415 | -3.024890 | -0.616489 |
| C | -1.999711 | 1.501571  | -0.580315 |
| C | -0.659179 | 1.255120  | 0.188660  |
| C | 0.319283  | 0.356731  | -0.629489 |
| C | -0.317861 | -0.974326 | -0.964044 |
| O | -2.007655 | 2.904448  | -0.955254 |
| C | -0.997910 | 3.605127  | -0.365935 |
| C | -0.156422 | 2.658283  | 0.426778  |
| O | -0.868896 | 4.798353  | -0.504480 |
| C | 0.834335  | 3.096189  | 1.209314  |
| C | -3.298306 | 1.200829  | 0.197832  |
| C | -0.105610 | -2.183866 | 1.257488  |
| O | -3.953054 | -3.561461 | -0.753802 |
| O | 1.528472  | 0.238638  | 0.165414  |
| C | 2.698053  | 0.074125  | -0.512347 |
| O | 2.764339  | 0.003197  | -1.720783 |
| C | 3.878596  | 0.041843  | 0.437529  |
| C | 5.089430  | -0.747083 | -0.092264 |
| C | 6.318467  | -0.485797 | 0.790807  |
| C | 4.783619  | -2.249524 | -0.188806 |
| H | -3.072287 | -2.942838 | 1.019041  |
| H | -3.396880 | -0.960229 | -1.319261 |
| H | -2.479098 | -0.056970 | 2.616318  |
| H | -3.485298 | -1.504505 | 2.443251  |
| H | -1.719665 | -3.019472 | -1.707980 |
| H | -1.375789 | -4.045350 | -0.310280 |
| H | -4.227754 | 0.093951  | 2.589583  |
| H | -0.852268 | 0.739613  | 1.133075  |
| H | 0.588601  | 0.864685  | -1.559683 |
| H | -0.723522 | -1.009400 | -1.973172 |
| H | 1.435478  | 2.420601  | 1.807518  |
| H | 1.050964  | 4.159821  | 1.252449  |
| H | -3.350491 | 1.873707  | 1.061560  |
| H | -2.015441 | 0.950725  | -1.522146 |
| H | -4.139173 | 1.463371  | -0.454511 |
| H | 0.540945  | -1.370383 | 1.585220  |
| H | 0.466948  | -3.118457 | 1.327187  |
| H | -0.937512 | -2.282124 | 1.965497  |
| H | -4.855523 | -3.356606 | -0.474738 |

|   |          |           |           |
|---|----------|-----------|-----------|
| H | 4.161498 | 1.091182  | 0.603600  |
| H | 3.548207 | -0.344779 | 1.408601  |
| H | 5.301133 | -0.377349 | -1.102941 |
| H | 7.192892 | -1.024710 | 0.410683  |
| H | 6.571328 | 0.580211  | 0.823922  |
| H | 6.145136 | -0.821449 | 1.821308  |
| H | 5.643195 | -2.795331 | -0.592626 |
| H | 3.930028 | -2.444551 | -0.845436 |
| H | 4.560217 | -2.668359 | 0.801121  |

B3LYP energy = -1155.15364991 a.u.

(2S,6R,7S,8S)-1, Conf. F

|   |           |           |           |
|---|-----------|-----------|-----------|
| C | -3.715435 | -2.087232 | -0.091266 |
| C | -3.651410 | -0.595959 | -0.280592 |
| C | -3.428188 | 0.345927  | 0.653127  |
| C | -3.497283 | 0.124704  | 2.145583  |
| C | -1.178920 | -2.026376 | -0.187627 |
| C | -2.423187 | -2.748577 | -0.667425 |
| C | -1.653718 | 1.722125  | -0.553647 |
| C | -0.414558 | 1.144134  | 0.207122  |
| C | 0.310304  | 0.040960  | -0.623913 |
| C | -0.637699 | -1.083631 | -0.979121 |
| O | -1.316067 | 3.087938  | -0.913137 |
| C | -0.163948 | 3.511581  | -0.320540 |
| C | 0.419803  | 2.377053  | 0.457135  |
| O | 0.254290  | 4.638053  | -0.445921 |
| C | 1.489959  | 2.546248  | 1.239195  |
| C | -2.985394 | 1.742214  | 0.226006  |
| C | -0.740063 | -2.348799 | 1.219991  |
| O | -4.801718 | -2.691714 | -0.808068 |
| O | 1.446927  | -0.391496 | 0.168963  |
| C | 2.551357  | -0.808634 | -0.510463 |
| O | 2.637166  | -0.793684 | -1.719614 |
| C | 3.615137  | -1.319146 | 0.440464  |
| C | 5.052064  | -1.189470 | -0.095904 |
| C | 5.478851  | 0.281720  | -0.210971 |
| C | 6.022434  | -1.980514 | 0.793715  |
| H | -3.798044 | -2.340693 | 0.973002  |
| H | -3.613229 | -0.299623 | -1.330249 |
| H | -2.521711 | 0.283311  | 2.623785  |
| H | -3.851266 | -0.870617 | 2.420965  |
| H | -2.501554 | -2.702138 | -1.758430 |
| H | -2.427273 | -3.806775 | -0.380630 |
| H | -4.179603 | 0.858318  | 2.594113  |
| H | -0.725783 | 0.683967  | 1.148603  |
| H | 0.703421  | 0.478953  | -1.545307 |
| H | -1.039709 | -0.997125 | -1.986605 |
| H | 1.906728  | 1.734848  | 1.825288  |
| H | 1.963944  | 3.522126  | 1.293803  |
| H | -2.865810 | 2.389414  | 1.102649  |
| H | -1.805942 | 1.203351  | -1.501754 |
| H | -3.733871 | 2.220388  | -0.416391 |
| H | -0.426627 | -3.399951 | 1.274828  |
| H | -1.572076 | -2.241635 | 1.926742  |
| H | 0.091764  | -1.732454 | 1.559932  |
| H | -5.625984 | -2.274524 | -0.523811 |

|   |          |           |           |
|---|----------|-----------|-----------|
| H | 3.506413 | -0.814882 | 1.407538  |
| H | 3.377133 | -2.377864 | 0.617840  |
| H | 5.064755 | -1.627501 | -1.101378 |
| H | 6.493518 | 0.361137  | -0.615708 |
| H | 4.813591 | 0.843209  | -0.874124 |
| H | 5.475394 | 0.768886  | 0.772870  |
| H | 7.045700 | -1.913192 | 0.409108  |
| H | 5.752179 | -3.041748 | 0.840901  |
| H | 6.028513 | -1.589915 | 1.819433  |

B3LYP energy = -1155.15364933 a.u.

(2S,6R,7S,8S)-1, Conf. G

|   |           |           |           |
|---|-----------|-----------|-----------|
| C | -3.259548 | -2.639949 | 0.142864  |
| C | -3.464813 | -1.149048 | 0.105411  |
| C | -3.260454 | -0.253347 | 1.081776  |
| C | -3.044342 | -0.603606 | 2.532483  |
| C | -0.848673 | -1.991192 | -0.532514 |
| C | -1.724018 | -3.012771 | 0.164015  |
| C | -1.950789 | 1.510290  | -0.217358 |
| C | -0.515941 | 1.442838  | 0.408491  |
| C | 0.317330  | 0.270179  | -0.184171 |
| C | -0.281238 | -1.040618 | 0.230225  |
| O | -2.113586 | 2.856103  | -0.740463 |
| C | -1.001354 | 3.622353  | -0.582605 |
| C | 0.033536  | 2.827439  | 0.143640  |
| O | -0.936514 | 4.762084  | -0.979940 |
| C | 1.197061  | 3.381025  | 0.498912  |
| C | -3.148983 | 1.222278  | 0.710352  |
| C | -0.813511 | -2.036495 | -2.037852 |
| O | -3.911090 | -3.151253 | -1.027321 |
| O | 1.658180  | 0.392165  | 0.380993  |
| C | 2.686462  | -0.091412 | -0.362731 |
| O | 2.543586  | -0.582868 | -1.463578 |
| C | 4.014950  | 0.108119  | 0.339885  |
| C | 5.066539  | -0.964817 | 0.002629  |
| C | 6.444196  | -0.541918 | 0.533409  |
| C | 4.660245  | -2.341580 | 0.550498  |
| H | -3.715828 | -3.087850 | 1.037318  |
| H | -3.638858 | -0.783132 | -0.906235 |
| H | -3.153671 | -1.672645 | 2.730655  |
| H | -3.768733 | -0.070487 | 3.161650  |
| H | -1.617310 | -4.010821 | -0.281760 |
| H | -1.419404 | -3.093971 | 1.213285  |
| H | -2.048843 | -0.296417 | 2.880288  |
| H | -0.589334 | 1.276785  | 1.489855  |
| H | 0.396170  | 0.372746  | -1.267867 |
| H | -0.363650 | -1.143279 | 1.312163  |
| H | 1.948788  | 2.835845  | 1.056752  |
| H | 1.397548  | 4.412286  | 0.222308  |
| H | -3.066198 | 1.848126  | 1.606792  |
| H | -2.012678 | 0.847729  | -1.085368 |
| H | -4.045743 | 1.554722  | 0.175397  |
| H | -0.114480 | -1.316179 | -2.466063 |
| H | -1.812045 | -1.870110 | -2.460968 |
| H | -0.503491 | -3.035279 | -2.369058 |
| H | -3.867450 | -4.116061 | -1.016739 |

|   |          |           |           |
|---|----------|-----------|-----------|
| H | 4.380153 | 1.096015  | 0.024936  |
| H | 3.844758 | 0.168434  | 1.420662  |
| H | 5.120300 | -1.035359 | -1.090608 |
| H | 7.204924 | -1.287813 | 0.279167  |
| H | 6.762122 | 0.417603  | 0.109730  |
| H | 6.433532 | -0.439189 | 1.626057  |
| H | 5.405478 | -3.099603 | 0.285901  |
| H | 3.697440 | -2.668039 | 0.144800  |
| H | 4.581969 | -2.320510 | 1.645262  |

B3LYP energy = -1155.15362784 a.u.

(2S,6R,7S,8S)-1, Conf. H

|   |           |           |           |
|---|-----------|-----------|-----------|
| C | -4.071865 | -1.666499 | 0.219133  |
| C | -3.735987 | -0.208731 | 0.025219  |
| C | -3.327211 | 0.688707  | 0.935806  |
| C | -3.364489 | 0.469296  | 2.427119  |
| C | -1.576300 | -1.942695 | -0.382247 |
| C | -2.778149 | -2.555708 | 0.309643  |
| C | -1.398115 | 1.729692  | -0.373544 |
| C | -0.128284 | 1.227523  | 0.393430  |
| C | 0.286548  | -0.197523 | -0.076196 |
| C | -0.749075 | -1.189797 | 0.363526  |
| O | -1.031226 | 2.981293  | -1.013131 |
| C | 0.258119  | 3.341195  | -0.768390 |
| C | 0.879912  | 2.322915  | 0.129295  |
| O | 0.749290  | 4.345638  | -1.227211 |
| C | 2.114529  | 2.492910  | 0.611458  |
| C | -2.675993 | 1.981786  | 0.452604  |
| C | -1.491221 | -2.115607 | -1.875914 |
| O | -4.831502 | -2.163162 | -0.894108 |
| O | 1.558916  | -0.498193 | 0.571397  |
| C | 2.366991  | -1.394933 | -0.056706 |
| O | 2.099411  | -1.893726 | -1.131252 |
| C | 3.629588  | -1.656298 | 0.734504  |
| C | 4.819485  | -0.750769 | 0.315144  |
| C | 5.984344  | -0.948426 | 1.297015  |
| C | 5.267442  | -1.007674 | -1.130893 |
| H | -4.643541 | -1.829169 | 1.143156  |
| H | -3.654927 | 0.061272  | -1.028631 |
| H | -3.873471 | 1.305420  | 2.923256  |
| H | -2.351092 | 0.429960  | 2.849420  |
| H | -3.041695 | -3.533769 | -0.107312 |
| H | -2.547599 | -2.695672 | 1.370712  |
| H | -3.878767 | -0.452956 | 2.707971  |
| H | -0.336718 | 1.168740  | 1.468002  |
| H | 0.446304  | -0.207351 | -1.155993 |
| H | -0.913142 | -1.175912 | 1.441567  |
| H | 2.567387  | 1.783200  | 1.293321  |
| H | 2.684504  | 3.368879  | 0.314763  |
| H | -2.433275 | 2.636963  | 1.297466  |
| H | -1.636134 | 1.041712  | -1.189072 |
| H | -3.361607 | 2.542854  | -0.192740 |
| H | -2.379132 | -1.703867 | -2.371518 |
| H | -1.476691 | -3.184821 | -2.119956 |
| H | -0.594691 | -1.666425 | -2.306254 |
| H | -5.629590 | -1.625382 | -0.987600 |

|   |          |           |           |
|---|----------|-----------|-----------|
| H | 3.418406 | -1.509575 | 1.798048  |
| H | 3.901172 | -2.705236 | 0.574120  |
| H | 4.486381 | 0.293585  | 0.391798  |
| H | 6.828047 | -0.301096 | 1.034347  |
| H | 5.689391 | -0.716303 | 2.326556  |
| H | 6.342037 | -1.985362 | 1.274823  |
| H | 6.083607 | -0.329703 | -1.403618 |
| H | 4.452229 | -0.865191 | -1.845229 |
| H | 5.631899 | -2.035771 | -1.246993 |

B3LYP energy = -1155.15336451 a.u.

(2S,6R,7S,8S)-1, Conf. I

|   |           |           |           |
|---|-----------|-----------|-----------|
| C | -3.476699 | -2.209717 | 0.333710  |
| C | -3.624911 | -0.725236 | 0.139125  |
| C | -3.319647 | 0.240948  | 1.023996  |
| C | -3.113513 | 0.023977  | 2.503924  |
| C | -1.247311 | -1.890814 | -0.997263 |
| C | -2.443523 | -2.782287 | -0.681113 |
| C | -1.731295 | 1.653131  | -0.344033 |
| C | -0.392136 | 1.291867  | 0.382797  |
| C | 0.264172  | 0.006502  | -0.205173 |
| C | -0.648873 | -1.172094 | -0.032065 |
| O | -1.565125 | 2.987319  | -0.890281 |
| C | -0.349489 | 3.527419  | -0.599453 |
| C | 0.427806  | 2.551516  | 0.221938  |
| O | -0.024011 | 4.630177  | -0.971211 |
| C | 1.626413  | 2.870396  | 0.719663  |
| C | -3.019768 | 1.642487  | 0.508755  |
| C | -0.883805 | -1.816511 | -2.460292 |
| O | -4.685889 | -2.945028 | 0.077402  |
| O | 1.495924  | -0.195124 | 0.551493  |
| C | 2.512164  | -0.833015 | -0.086267 |
| O | 2.469119  | -1.158439 | -1.255007 |
| C | 3.663810  | -1.107553 | 0.859705  |
| C | 5.023933  | -1.287687 | 0.163863  |
| C | 5.512591  | 0.024278  | -0.468811 |
| C | 6.056801  | -1.842253 | 1.156222  |
| H | -3.137705 | -2.424519 | 1.354519  |
| H | -3.810271 | -0.431095 | -0.895867 |
| H | -3.351898 | -0.990837 | 2.828874  |
| H | -3.757256 | 0.712476  | 3.066193  |
| H | -3.000106 | -2.955274 | -1.609449 |
| H | -2.123477 | -3.773315 | -0.334655 |
| H | -2.084361 | 0.245794  | 2.816091  |
| H | -0.577019 | 1.101452  | 1.444905  |
| H | 0.532806  | 0.172125  | -1.249555 |
| H | -0.954557 | -1.329211 | 1.000544  |
| H | 2.190570  | 2.186566  | 1.342760  |
| H | 2.052394  | 3.844086  | 0.495249  |
| H | -2.908273 | 2.355037  | 1.334198  |
| H | -1.879334 | 0.994085  | -1.203339 |
| H | -3.829812 | 2.014370  | -0.128728 |
| H | -1.661985 | -1.294959 | -3.034995 |
| H | -0.823376 | -2.830311 | -2.874820 |
| H | 0.076986  | -1.331245 | -2.637921 |
| H | -5.387591 | -2.579297 | 0.632309  |

|   |          |           |           |
|---|----------|-----------|-----------|
| H | 3.705571 | -0.312821 | 1.613926  |
| H | 3.393531 | -2.025006 | 1.402163  |
| H | 4.884256 | -2.020864 | -0.639952 |
| H | 6.467237 | -0.126022 | -0.984482 |
| H | 4.797357 | 0.408266  | -1.202571 |
| H | 5.668167 | 0.795203  | 0.297165  |
| H | 7.023839 | -1.997101 | 0.665856  |
| H | 5.737152 | -2.802993 | 1.576043  |
| H | 6.216703 | -1.147947 | 1.991015  |

B3LYP energy = -1155.15305279 a.u.

(2S,6R,7S,8S)-1, Conf. J

|   |           |           |           |
|---|-----------|-----------|-----------|
| C | -2.835371 | -2.722106 | 0.347594  |
| C | -3.321080 | -1.305277 | 0.207950  |
| C | -3.188897 | -0.313500 | 1.107303  |
| C | -2.854890 | -0.509366 | 2.566882  |
| C | -0.806247 | -1.876440 | -1.071327 |
| C | -1.748533 | -3.024842 | -0.726805 |
| C | -2.031915 | 1.453172  | -0.282731 |
| C | -0.608682 | 1.387606  | 0.367728  |
| C | 0.286170  | 0.292947  | -0.287584 |
| C | -0.331703 | -1.063351 | -0.112483 |
| O | -2.200358 | 2.803358  | -0.788175 |
| C | -1.119753 | 3.594823  | -0.545109 |
| C | -0.099119 | 2.801519  | 0.203433  |
| O | -1.069025 | 4.749386  | -0.898215 |
| C | 1.025109  | 3.371292  | 0.648136  |
| C | -3.239813 | 1.129653  | 0.624443  |
| C | -0.550100 | -1.689795 | -2.547046 |
| O | -3.860419 | -3.704366 | 0.117495  |
| O | 1.567244  | 0.357109  | 0.409979  |
| C | 2.668779  | -0.019829 | -0.289943 |
| O | 2.635322  | -0.371254 | -1.451447 |
| C | 3.923712  | 0.105361  | 0.551337  |
| C | 5.053707  | -0.853883 | 0.135928  |
| C | 6.363497  | -0.465237 | 0.837305  |
| C | 4.682521  | -2.316773 | 0.422861  |
| H | -2.409240 | -2.878448 | 1.346058  |
| H | -3.624179 | -1.039879 | -0.806900 |
| H | -1.881155 | -0.075659 | 2.830282  |
| H | -2.849419 | -1.557914 | 2.871132  |
| H | -2.294957 | -3.308584 | -1.633604 |
| H | -1.191879 | -3.919546 | -0.419814 |
| H | -3.597735 | 0.011796  | 3.184189  |
| H | -0.688901 | 1.143219  | 1.431888  |
| H | 0.459911  | 0.535993  | -1.336975 |
| H | -0.535830 | -1.309367 | 0.927952  |
| H | 1.761540  | 2.820233  | 1.221084  |
| H | 1.210093  | 4.419738  | 0.432290  |
| H | -3.254245 | 1.831472  | 1.466360  |
| H | -2.072964 | 0.799828  | -1.158109 |
| H | -4.143268 | 1.319270  | 0.033962  |
| H | -0.276470 | -2.652476 | -2.996178 |
| H | 0.259486  | -0.988746 | -2.755275 |
| H | -1.458418 | -1.354676 | -3.067120 |
| H | -4.598688 | -3.518311 | 0.712873  |

|   |          |           |           |
|---|----------|-----------|-----------|
| H | 4.260962 | 1.146043  | 0.441301  |
| H | 3.661699 | -0.024723 | 1.607552  |
| H | 5.192280 | -0.743924 | -0.946556 |
| H | 7.180498 | -1.127083 | 0.530489  |
| H | 6.658654 | 0.562977  | 0.598284  |
| H | 6.267534 | -0.541749 | 1.927964  |
| H | 5.483540 | -2.990966 | 0.100790  |
| H | 3.770063 | -2.610415 | -0.105439 |
| H | 4.524629 | -2.477818 | 1.497203  |

B3LYP energy = -1155.15295549 a.u.

(2S,6R,7S,8S)-1, Conf. K

|   |           |           |           |
|---|-----------|-----------|-----------|
| C | -3.224444 | -2.533308 | 0.209444  |
| C | -3.371783 | -1.036666 | 0.267778  |
| C | -3.041748 | -0.202404 | 1.263943  |
| C | -2.695331 | -0.640235 | 2.664914  |
| C | -0.879273 | -1.934476 | -0.696889 |
| C | -1.710372 | -2.957216 | 0.050853  |
| C | -1.809113 | 1.583397  | -0.081294 |
| C | -0.315661 | 1.435301  | 0.370110  |
| C | 0.394121  | 0.274384  | -0.384943 |
| C | -0.196991 | -1.037525 | 0.036684  |
| O | -1.977190 | 2.959457  | -0.516198 |
| C | -0.827355 | 3.681780  | -0.441633 |
| C | 0.251332  | 2.815336  | 0.120339  |
| O | -0.765314 | 4.840174  | -0.781078 |
| C | 1.466930  | 3.310097  | 0.372652  |
| C | -2.908192 | 1.286744  | 0.959593  |
| C | -1.009392 | -1.913775 | -2.197393 |
| O | -4.012624 | -2.958788 | -0.909912 |
| O | 1.801185  | 0.323571  | -0.001275 |
| C | 2.702990  | -0.130122 | -0.912154 |
| O | 2.396461  | -0.512328 | -2.023166 |
| C | 4.111672  | -0.089886 | -0.360476 |
| C | 4.355219  | -1.059777 | 0.821715  |
| C | 4.097877  | -2.519956 | 0.420445  |
| C | 5.781382  | -0.875754 | 1.360735  |
| H | -3.602778 | -3.013030 | 1.123540  |
| H | -3.627110 | -0.611406 | -0.702554 |
| H | -2.839823 | -1.712188 | 2.821431  |
| H | -3.319843 | -0.107976 | 3.393806  |
| H | -1.687508 | -3.939408 | -0.440028 |
| H | -1.300904 | -3.088243 | 1.058542  |
| H | -1.653474 | -0.400624 | 2.917511  |
| H | -0.268508 | 1.207271  | 1.441696  |
| H | 0.334335  | 0.435640  | -1.462563 |
| H | -0.164747 | -1.187484 | 1.115847  |
| H | 2.253571  | 2.708054  | 0.811273  |
| H | 1.676286  | 4.348599  | 0.132333  |
| H | -2.701176 | 1.857381  | 1.872566  |
| H | -1.991356 | 0.968626  | -0.967148 |
| H | -3.843395 | 1.681841  | 0.546900  |
| H | -2.044040 | -1.711343 | -2.500463 |
| H | -0.760445 | -2.903025 | -2.601231 |
| H | -0.343809 | -1.189222 | -2.669469 |
| H | -4.001847 | -3.923581 | -0.954985 |

|   |          |           |           |
|---|----------|-----------|-----------|
| H | 4.785433 | -0.326906 | -1.189205 |
| H | 4.322449 | 0.935595  | -0.033280 |
| H | 3.650153 | -0.791724 | 1.619277  |
| H | 4.272753 | -3.189813 | 1.269545  |
| H | 3.069301 | -2.675580 | 0.078421  |
| H | 4.767976 | -2.826480 | -0.392084 |
| H | 5.960828 | -1.532275 | 2.219077  |
| H | 5.959992 | 0.155981  | 1.684132  |
| H | 6.526341 | -1.121002 | 0.593607  |

B3LYP energy = -1155.15272896 a.u.

(2S,6R,7S,8S)-1, Conf. L

|   |           |           |           |
|---|-----------|-----------|-----------|
| C | -3.488354 | -2.413485 | 0.079313  |
| C | -3.535356 | -0.916055 | -0.093313 |
| C | -3.421054 | 0.042133  | 0.839697  |
| C | -3.477503 | -0.203699 | 2.326287  |
| C | -0.979913 | -2.020689 | -0.393750 |
| C | -2.013465 | -2.935725 | 0.234154  |
| C | -1.775704 | 1.575727  | -0.374760 |
| C | -0.450053 | 1.413455  | 0.442822  |
| C | 0.341656  | 0.146617  | 0.004928  |
| C | -0.419230 | -1.085815 | 0.393216  |
| O | -1.729162 | 2.891483  | -0.988213 |
| C | -0.584199 | 3.568206  | -0.700185 |
| C | 0.254791  | 2.731157  | 0.208123  |
| O | -0.357056 | 4.672518  | -1.135531 |
| C | 1.398262  | 3.202320  | 0.714593  |
| C | -3.107395 | 1.468555  | 0.396425  |
| C | -0.772782 | -2.147458 | -1.880370 |
| O | -4.035902 | -3.073877 | -1.072673 |
| O | 1.609000  | 0.183707  | 0.725432  |
| C | 2.678517  | -0.410197 | 0.129126  |
| O | 2.633002  | -0.900118 | -0.979985 |
| C | 3.884326  | -0.353102 | 1.049150  |
| C | 5.196623  | -0.965300 | 0.520226  |
| C | 5.089277  | -2.480948 | 0.284299  |
| C | 5.737251  | -0.229763 | -0.717053 |
| H | -4.042445 | -2.734565 | 0.972100  |
| H | -3.475823 | -0.617850 | -1.140926 |
| H | -2.513136 | 0.016370  | 2.803980  |
| H | -3.747623 | -1.232371 | 2.576230  |
| H | -1.991921 | -3.942183 | -0.197652 |
| H | -1.807464 | -3.026861 | 1.305571  |
| H | -4.212853 | 0.462649  | 2.794959  |
| H | -0.678903 | 1.301772  | 1.509331  |
| H | 0.557818  | 0.187961  | -1.064181 |
| H | -0.635646 | -1.127700 | 1.461193  |
| H | 2.004000  | 2.624299  | 1.402160  |
| H | 1.733920  | 4.195913  | 0.431326  |
| H | -3.077547 | 2.147019  | 1.257098  |
| H | -1.791651 | 0.864495  | -1.204996 |
| H | -3.888703 | 1.846116  | -0.273203 |
| H | 0.011419  | -1.489175 | -2.258275 |
| H | -1.703992 | -1.953767 | -2.427148 |
| H | -0.487853 | -3.178264 | -2.123332 |
| H | -4.940928 | -2.761114 | -1.206922 |

|   |          |           |           |
|---|----------|-----------|-----------|
| H | 4.038905 | 0.702459  | 1.308629  |
| H | 3.588507 | -0.843202 | 1.985997  |
| H | 5.921983 | -0.813116 | 1.332682  |
| H | 6.069746 | -2.897606 | 0.028349  |
| H | 4.734019 | -2.998918 | 1.183433  |
| H | 4.400273 | -2.705971 | -0.534363 |
| H | 6.726495 | -0.614883 | -0.988103 |
| H | 5.841730 | 0.845328  | -0.527125 |
| H | 5.074457 | -0.362150 | -1.576612 |

B3LYP energy = -1155.15251117 a.u.

(2S,6R,7S,8S)-1, Conf. M

|   |           |           |           |
|---|-----------|-----------|-----------|
| C | -2.872351 | -2.826824 | 0.093947  |
| C | -3.198445 | -1.354905 | 0.055505  |
| C | -3.119845 | -0.449952 | 1.043638  |
| C | -2.920014 | -0.790778 | 2.498764  |
| C | -0.554472 | -1.959346 | -0.644619 |
| C | -1.322618 | -3.082834 | 0.024021  |
| C | -1.937856 | 1.422917  | -0.228843 |
| C | -0.508445 | 1.452691  | 0.410392  |
| C | 0.424450  | 0.379694  | -0.224366 |
| C | -0.055744 | -0.992447 | 0.145699  |
| O | -2.196454 | 2.759440  | -0.735681 |
| C | -1.156111 | 3.612231  | -0.530208 |
| C | -0.077043 | 2.887801  | 0.204556  |
| O | -1.178384 | 4.762807  | -0.899383 |
| C | 1.023266  | 3.527417  | 0.612461  |
| C | -3.119135 | 1.033079  | 0.683406  |
| C | -0.537981 | -1.947924 | -2.150888 |
| O | -3.448294 | -3.502991 | -1.034720 |
| O | 1.751638  | 0.597807  | 0.340056  |
| C | 2.816268  | 0.285682  | -0.446784 |
| O | 2.707524  | -0.107169 | -1.591146 |
| C | 4.128109  | 0.486610  | 0.282451  |
| C | 4.826367  | -0.838319 | 0.700065  |
| C | 3.944216  | -1.683543 | 1.631738  |
| C | 5.320613  | -1.654010 | -0.503770 |
| H | -3.237869 | -3.297258 | 1.017127  |
| H | -3.339921 | -0.988121 | -0.962094 |
| H | -1.948057 | -0.430660 | 2.862891  |
| H | -2.972586 | -1.864505 | 2.693785  |
| H | -1.187865 | -4.040132 | -0.491192 |
| H | -0.961474 | -3.202136 | 1.050732  |
| H | -3.682767 | -0.297161 | 3.114255  |
| H | -0.573320 | 1.235584  | 1.483007  |
| H | 0.489283  | 0.527542  | -1.303744 |
| H | -0.113763 | -1.140920 | 1.224481  |
| H | 1.803242  | 3.029707  | 1.175867  |
| H | 1.143256  | 4.580201  | 0.372988  |
| H | -3.094591 | 1.654708  | 1.586130  |
| H | -1.940487 | 0.770256  | -1.105940 |
| H | -4.034440 | 1.300137  | 0.142893  |
| H | -0.131998 | -2.897178 | -2.520649 |
| H | 0.072669  | -1.142623 | -2.562863 |
| H | -1.555005 | -1.875380 | -2.556275 |
| H | -4.403721 | -3.354490 | -1.029253 |

|   |          |           |           |
|---|----------|-----------|-----------|
| H | 4.787965 | 1.039932  | -0.394334 |
| H | 3.952162 | 1.098624  | 1.171620  |
| H | 5.709594 | -0.522350 | 1.272723  |
| H | 4.496260 | -2.557702 | 1.993449  |
| H | 3.613392 | -1.108886 | 2.504179  |
| H | 3.050339 | -2.048299 | 1.112448  |
| H | 5.879601 | -2.532095 | -0.161471 |
| H | 5.983827 | -1.059763 | -1.141968 |
| H | 4.488651 | -1.999618 | -1.124792 |

B3LYP energy = -1155.15245205 a.u.

(2S,6R,7S,8S)-1, Conf. N

|   |           |           |           |
|---|-----------|-----------|-----------|
| C | -2.703777 | -2.868961 | -0.074369 |
| C | -3.146633 | -1.437899 | -0.216726 |
| C | -3.207285 | -0.493597 | 0.739137  |
| C | -3.134072 | -0.753566 | 2.225187  |
| C | -0.345300 | -1.957690 | -0.287257 |
| C | -1.297742 | -3.051577 | -0.729054 |
| C | -2.046543 | 1.414870  | -0.492702 |
| C | -0.647047 | 1.258763  | 0.189317  |
| C | 0.350897  | 0.488993  | -0.730070 |
| C | -0.182549 | -0.883692 | -1.080085 |
| O | -2.193091 | 2.823725  | -0.812066 |
| C | -1.217456 | 3.588752  | -0.245298 |
| C | -0.255538 | 2.690477  | 0.462674  |
| O | -1.200419 | 4.793030  | -0.338960 |
| C | 0.734482  | 3.183101  | 1.212771  |
| C | -3.268541 | 0.978876  | 0.343048  |
| C | 0.236690  | -2.118665 | 1.095652  |
| O | -3.564245 | -3.788860 | -0.761517 |
| O | 1.624695  | 0.455836  | -0.034508 |
| C | 2.747858  | 0.503932  | -0.807204 |
| O | 2.721164  | 0.575765  | -2.017579 |
| C | 4.000580  | 0.441204  | 0.037686  |
| C | 4.329840  | -0.983137 | 0.554615  |
| C | 4.559938  | -1.973754 | -0.596103 |
| C | 5.548450  | -0.923612 | 1.487652  |
| H | -2.640858 | -3.152622 | 0.983558  |
| H | -3.255050 | -1.125130 | -1.256500 |
| H | -3.136826 | -1.814963 | 2.481112  |
| H | -2.240545 | -0.298167 | 2.672407  |
| H | -1.445347 | -3.021843 | -1.813400 |
| H | -0.931471 | -4.052613 | -0.472342 |
| H | -3.995028 | -0.288121 | 2.722101  |
| H | -0.736883 | 0.690381  | 1.118577  |
| H | 0.501691  | 1.054839  | -1.653146 |
| H | -0.631086 | -0.928150 | -2.070543 |
| H | 1.422704  | 2.540078  | 1.750039  |
| H | 0.861865  | 4.259006  | 1.291630  |
| H | -3.323463 | 1.611857  | 1.236273  |
| H | -2.070318 | 0.896569  | -1.452670 |
| H | -4.164632 | 1.196771  | -0.249611 |
| H | 0.888737  | -3.002023 | 1.118661  |
| H | -0.550673 | -2.300876 | 1.837151  |
| H | 0.826485  | -1.258855 | 1.412295  |
| H | -4.464371 | -3.672836 | -0.428935 |

|   |          |           |           |
|---|----------|-----------|-----------|
| H | 4.823723 | 0.809602  | -0.581982 |
| H | 3.881963 | 1.114770  | 0.893513  |
| H | 3.468632 | -1.328851 | 1.141897  |
| H | 4.778044 | -2.973226 | -0.204074 |
| H | 3.687884 | -2.052291 | -1.252576 |
| H | 5.410809 | -1.663176 | -1.214537 |
| H | 5.781149 | -1.916235 | 1.888322  |
| H | 5.374704 | -0.251254 | 2.335439  |
| H | 6.435821 | -0.565507 | 0.951165  |

B3LYP energy = -1155.15228989 a.u.

(2S,6R,7S,8S)-1, Conf. O

|   |           |           |           |
|---|-----------|-----------|-----------|
| C | -3.883348 | -1.768913 | -0.006457 |
| C | -3.663235 | -0.297263 | -0.227025 |
| C | -3.328134 | 0.633199  | 0.684445  |
| C | -3.394441 | 0.448227  | 2.181934  |
| C | -1.360458 | -1.975100 | -0.168340 |
| C | -2.684734 | -2.573797 | -0.600781 |
| C | -1.438042 | 1.790272  | -0.579166 |
| C | -0.256283 | 1.084116  | 0.165269  |
| C | 0.328237  | -0.089458 | -0.679060 |
| C | -0.741924 | -1.112974 | -0.993865 |
| O | -0.956190 | 3.106797  | -0.959289 |
| C | 0.242458  | 3.406733  | -0.384215 |
| C | 0.706297  | 2.222781  | 0.400616  |
| O | 0.781105  | 4.478739  | -0.527103 |
| C | 1.787641  | 2.284988  | 1.182825  |
| C | -2.744742 | 1.965911  | 0.223284  |
| C | -0.919973 | -2.313919 | 1.235093  |
| O | -5.047580 | -2.264999 | -0.682914 |
| O | 1.445520  | -0.629601 | 0.074218  |
| C | 2.400602  | -1.286253 | -0.643955 |
| O | 2.351913  | -1.415332 | -1.849219 |
| C | 3.513536  | -1.791447 | 0.246485  |
| C | 4.664224  | -0.766055 | 0.435474  |
| C | 5.649504  | -1.289336 | 1.491588  |
| C | 5.384821  | -0.452031 | -0.883628 |
| H | -3.963422 | -1.992703 | 1.064465  |
| H | -3.611503 | -0.025910 | -1.282669 |
| H | -2.398751 | 0.508163  | 2.640934  |
| H | -3.848964 | -0.497595 | 2.483166  |
| H | -2.787800 | -2.541263 | -1.690189 |
| H | -2.790630 | -3.619862 | -0.289892 |
| H | -3.984935 | 1.259604  | 2.626761  |
| H | -0.601573 | 0.660597  | 1.111967  |
| H | 0.728031  | 0.303608  | -1.618209 |
| H | -1.150678 | -1.008664 | -1.996724 |
| H | 2.114942  | 1.438647  | 1.776265  |
| H | 2.361937  | 3.205849  | 1.231020  |
| H | -2.539782 | 2.610945  | 1.085601  |
| H | -1.664082 | 1.283849  | -1.518990 |
| H | -3.449526 | 2.511862  | -0.414582 |
| H | -0.032684 | -1.764885 | 1.549647  |
| H | -0.691079 | -3.386349 | 1.297194  |
| H | -1.724101 | -2.131250 | 1.958347  |
| H | -5.813380 | -1.754019 | -0.388456 |

|   |          |           |           |
|---|----------|-----------|-----------|
| H | 3.096282 | -2.050769 | 1.224583  |
| H | 3.911444 | -2.700831 | -0.215767 |
| H | 4.221231 | 0.164255  | 0.816656  |
| H | 6.458293 | -0.569689 | 1.658329  |
| H | 5.154995 | -1.468603 | 2.453000  |
| H | 6.106090 | -2.232484 | 1.166704  |
| H | 6.169265 | 0.295237  | -0.721679 |
| H | 4.701372 | -0.067101 | -1.645499 |
| H | 5.858840 | -1.353567 | -1.290655 |

B3LYP energy = -1155.15212527 a.u.

(1R,5S,6S,7S,10R)-2, Conf. A

|   |           |           |           |
|---|-----------|-----------|-----------|
| C | 3.473160  | 0.018619  | -0.253346 |
| C | 2.940311  | 1.406886  | -0.664193 |
| C | 1.588658  | 1.670638  | -0.038902 |
| C | 0.571696  | 0.589024  | -0.375943 |
| C | 1.060304  | -0.789533 | 0.194841  |
| C | 2.436763  | -1.082160 | -0.483231 |
| C | -0.892978 | 0.929983  | -0.035054 |
| C | -1.858438 | -0.193906 | -0.454628 |
| C | -1.407851 | -1.538660 | 0.142088  |
| C | 0.043324  | -1.876218 | -0.228154 |
| C | -3.347243 | 0.161429  | -0.177267 |
| C | -4.303050 | -0.788296 | -0.919849 |
| C | -3.713035 | 0.231878  | 1.315681  |
| O | -1.308184 | 2.107669  | -0.742867 |
| C | 1.373652  | 2.718688  | 0.770210  |
| O | 3.035611  | -2.301767 | -0.030376 |
| H | 0.590112  | 0.484261  | -1.474194 |
| C | 1.208040  | -0.774140 | 1.730176  |
| H | 3.758956  | 0.023795  | 0.804411  |
| H | 4.375975  | -0.226964 | -0.822808 |
| H | 3.657438  | 2.185070  | -0.383462 |
| H | 2.840886  | 1.440602  | -1.759453 |
| H | 2.249064  | -1.157838 | -1.568152 |
| H | -0.987401 | 1.106951  | 1.047219  |
| H | -1.761149 | -0.267058 | -1.549392 |
| H | -2.061638 | -2.340177 | -0.218883 |
| H | -1.519659 | -1.524652 | 1.232559  |
| H | 0.103083  | -2.012213 | -1.318810 |
| H | 0.317825  | -2.836294 | 0.229490  |
| H | -3.494516 | 1.162329  | -0.597957 |
| H | -4.264607 | -1.808841 | -0.520467 |
| H | -5.338649 | -0.442842 | -0.824594 |
| H | -4.066812 | -0.836495 | -1.989374 |
| H | -4.743516 | 0.585260  | 1.434026  |
| H | -3.068696 | 0.924110  | 1.868115  |
| H | -3.649894 | -0.749155 | 1.801683  |
| H | -0.626464 | 2.785181  | -0.636343 |
| H | 0.427320  | 2.893661  | 1.274744  |
| H | 2.165030  | 3.434070  | 0.978119  |
| H | 2.496885  | -3.047232 | -0.324411 |
| H | 1.664130  | -1.709438 | 2.067574  |
| H | 1.836605  | 0.050476  | 2.073540  |
| H | 0.240398  | -0.669169 | 2.228213  |

B3LYP energy = -737.751540513 a.u.

(1R,5S,6S,7S,10R)-2, Conf. B

|   |           |           |           |
|---|-----------|-----------|-----------|
| C | 3.468920  | 0.024609  | -0.242310 |
| C | 2.939471  | 1.411723  | -0.664676 |
| C | 1.588114  | 1.671511  | -0.036903 |
| C | 0.572325  | 0.590935  | -0.379485 |
| C | 1.055433  | -0.793340 | 0.183640  |
| C | 2.431695  | -1.082390 | -0.477148 |
| C | -0.892583 | 0.929020  | -0.035947 |
| C | -1.859476 | -0.192326 | -0.459977 |
| C | -1.404890 | -1.544807 | 0.117433  |
| C | 0.044902  | -1.877246 | -0.259334 |
| C | -3.346355 | 0.161923  | -0.170059 |
| C | -4.307295 | -0.780464 | -0.915391 |
| C | -3.703112 | 0.217438  | 1.325794  |
| O | -1.307613 | 2.111067  | -0.738162 |
| C | 1.376410  | 2.714265  | 0.779836  |
| O | 2.903058  | -2.344825 | 0.011623  |
| H | 0.590388  | 0.491780  | -1.477926 |
| C | 1.186311  | -0.788177 | 1.722077  |
| H | 3.745401  | 0.036336  | 0.817785  |
| H | 4.382336  | -0.210092 | -0.806089 |
| H | 3.656170  | 2.191845  | -0.388017 |
| H | 2.839354  | 1.438265  | -1.759913 |
| H | 2.252603  | -1.165230 | -1.562945 |
| H | -0.986317 | 1.102040  | 1.046823  |
| H | -1.768678 | -0.253314 | -1.556044 |
| H | -2.058481 | -2.341215 | -0.255253 |
| H | -1.518499 | -1.547718 | 1.208019  |
| H | 0.107652  | -1.989539 | -1.351733 |
| H | 0.341288  | -2.840153 | 0.168920  |
| H | -3.496685 | 1.166990  | -0.579866 |
| H | -4.266737 | -1.804316 | -0.525053 |
| H | -5.342171 | -0.435056 | -0.811402 |
| H | -4.076772 | -0.819807 | -1.986537 |
| H | -4.733574 | 0.567675  | 1.454150  |
| H | -3.056611 | 0.905561  | 1.880981  |
| H | -3.634426 | -0.768096 | 1.801608  |
| H | -0.628674 | 2.789888  | -0.623656 |
| H | 0.431257  | 2.885832  | 1.287583  |
| H | 2.168354  | 3.428295  | 0.990492  |
| H | 3.735400  | -2.558540 | -0.429003 |
| H | 1.841010  | 0.011050  | 2.077683  |
| H | 0.216519  | -0.645451 | 2.205785  |
| H | 1.597115  | -1.742996 | 2.060620  |

B3LYP energy = -737.751313607 a.u.

(1R,5S,6S,7S,10R)-2, Conf. C

|   |           |           |           |
|---|-----------|-----------|-----------|
| C | 3.471741  | 0.025438  | -0.267935 |
| C | 2.934635  | 1.415894  | -0.668959 |
| C | 1.587772  | 1.668915  | -0.030121 |
| C | 0.571555  | 0.590761  | -0.377553 |
| C | 1.054640  | -0.796265 | 0.177374  |
| C | 2.437243  | -1.087531 | -0.486832 |
| C | -0.893981 | 0.929807  | -0.035861 |

|   |           |           |           |
|---|-----------|-----------|-----------|
| C | -1.861614 | -0.191116 | -0.459346 |
| C | -1.405641 | -1.544719 | 0.115157  |
| C | 0.042527  | -1.875252 | -0.269665 |
| C | -3.347915 | 0.162902  | -0.166451 |
| C | -4.310147 | -0.776711 | -0.913548 |
| C | -3.702716 | 0.213885  | 1.330041  |
| O | -1.307097 | 2.111982  | -0.738019 |
| C | 1.378100  | 2.703940  | 0.797003  |
| O | 2.972210  | -2.362111 | -0.114621 |
| H | 0.591428  | 0.494693  | -1.476198 |
| C | 1.179006  | -0.792947 | 1.716234  |
| H | 3.768902  | 0.046872  | 0.789689  |
| H | 4.371970  | -0.216707 | -0.843592 |
| H | 3.652481  | 2.194701  | -0.391350 |
| H | 2.826633  | 1.451271  | -1.762992 |
| H | 2.257886  | -1.185066 | -1.565636 |
| H | -0.989249 | 1.103706  | 1.046781  |
| H | -1.772591 | -0.251171 | -1.555501 |
| H | -2.061178 | -2.340158 | -0.256005 |
| H | -1.515252 | -1.549233 | 1.206439  |
| H | 0.101380  | -1.977870 | -1.362852 |
| H | 0.340578  | -2.843748 | 0.145737  |
| H | -3.498182 | 1.169307  | -0.572981 |
| H | -4.269108 | -1.801987 | -0.527017 |
| H | -5.344776 | -0.431569 | -0.806598 |
| H | -4.081415 | -0.812160 | -1.985151 |
| H | -4.732407 | 0.565319  | 1.460904  |
| H | -3.054646 | 0.899206  | 1.887006  |
| H | -3.635228 | -0.773496 | 1.802269  |
| H | -0.629932 | 2.791895  | -0.619119 |
| H | 0.434031  | 2.870981  | 1.308342  |
| H | 2.169718  | 3.417660  | 1.009991  |
| H | 3.325695  | -2.303179 | 0.783125  |
| H | 1.887666  | -0.042358 | 2.075610  |
| H | 0.221769  | -0.580635 | 2.198627  |
| H | 1.501682  | -1.777234 | 2.074353  |

B3LYP energy = -737.751006437 a.u.

(1R,5S,6S,7S,10R)-2, Conf. D

|   |           |           |           |
|---|-----------|-----------|-----------|
| C | 3.424038  | 0.428413  | -0.266814 |
| C | 2.675713  | 1.734706  | -0.602804 |
| C | 1.311044  | 1.751761  | 0.049687  |
| C | 0.467192  | 0.545486  | -0.340171 |
| C | 1.173530  | -0.768282 | 0.150966  |
| C | 2.568826  | -0.807439 | -0.548849 |
| C | -1.027760 | 0.638063  | 0.032072  |
| C | -1.820972 | -0.592745 | -0.443031 |
| C | -1.148510 | -1.883591 | 0.063226  |
| C | 0.331492  | -1.973763 | -0.328448 |
| C | -3.340682 | -0.580057 | -0.086493 |
| C | -3.639958 | -0.121955 | 1.351622  |
| C | -4.194614 | 0.209016  | -1.094109 |
| O | -1.620943 | 1.787435  | -0.590318 |
| C | 0.956379  | 2.703599  | 0.925921  |
| O | 3.355161  | -1.940686 | -0.163701 |
| H | 0.485055  | 0.503888  | -1.442639 |

|   |           |           |           |
|---|-----------|-----------|-----------|
| C | 1.337173  | -0.814651 | 1.683921  |
| H | 3.717496  | 0.425676  | 0.788857  |
| H | 4.347125  | 0.356374  | -0.851896 |
| H | 3.268173  | 2.600362  | -0.289246 |
| H | 2.553282  | 1.805806  | -1.693896 |
| H | 2.380668  | -0.855408 | -1.635130 |
| H | -1.126876 | 0.727637  | 1.124179  |
| H | -1.748195 | -0.594091 | -1.541543 |
| H | -1.682875 | -2.746350 | -0.352537 |
| H | -1.254985 | -1.960141 | 1.152764  |
| H | 0.398521  | -2.038118 | -1.425376 |
| H | 0.754609  | -2.904650 | 0.072733  |
| H | -3.660837 | -1.630489 | -0.159974 |
| H | -3.046690 | -0.667086 | 2.094981  |
| H | -3.443575 | 0.948541  | 1.475041  |
| H | -4.695933 | -0.291769 | 1.589574  |
| H | -3.947608 | 1.272977  | -1.074654 |
| H | -5.260545 | 0.092732  | -0.863510 |
| H | -4.034385 | -0.154388 | -2.116039 |
| H | -1.038410 | 2.545956  | -0.445795 |
| H | 0.006651  | 2.699171  | 1.453811  |
| H | 1.633871  | 3.518358  | 1.167342  |
| H | 2.941244  | -2.743842 | -0.504116 |
| H | 1.933655  | -1.686912 | 1.966622  |
| H | 1.838085  | 0.075449  | 2.071088  |
| H | 0.371389  | -0.885051 | 2.191340  |

B3LYP energy = -737.749907514 a.u.

(1R,5S,6S,7S,10R)-2, Conf. E

|   |           |           |           |
|---|-----------|-----------|-----------|
| C | 3.418776  | 0.432157  | -0.257601 |
| C | 2.673925  | 1.738623  | -0.604581 |
| C | 1.310732  | 1.752288  | 0.051184  |
| C | 0.467602  | 0.547194  | -0.342633 |
| C | 1.169419  | -0.772373 | 0.141264  |
| C | 2.563032  | -0.809559 | -0.543135 |
| C | -1.027149 | 0.636944  | 0.031882  |
| C | -1.821263 | -0.591320 | -0.448835 |
| C | -1.145389 | -1.887209 | 0.041484  |
| C | 0.332540  | -1.973850 | -0.355245 |
| C | -3.339469 | -0.580282 | -0.086144 |
| C | -3.633354 | -0.132132 | 1.356268  |
| C | -4.198236 | 0.215332  | -1.084565 |
| O | -1.620600 | 1.790582  | -0.584029 |
| C | 0.960662  | 2.699864  | 0.933831  |
| O | 3.231966  | -2.006482 | -0.124619 |
| H | 0.484087  | 0.510273  | -1.444969 |
| C | 1.320825  | -0.830086 | 1.676410  |
| H | 3.703600  | 0.434560  | 0.800363  |
| H | 4.349830  | 0.371875  | -0.837824 |
| H | 3.266195  | 2.606111  | -0.295577 |
| H | 2.550998  | 1.802526  | -1.695898 |
| H | 2.382419  | -0.864049 | -1.630330 |
| H | -1.125466 | 0.721704  | 1.124281  |
| H | -1.753095 | -0.582942 | -1.547619 |
| H | -1.680932 | -2.744782 | -0.383651 |
| H | -1.252242 | -1.977488 | 1.130239  |

|   |           |           |           |
|---|-----------|-----------|-----------|
| H | 0.399383  | -2.017336 | -1.452425 |
| H | 0.776996  | -2.901657 | 0.019231  |
| H | -3.659534 | -1.630242 | -0.165176 |
| H | -4.688191 | -0.304559 | 1.597721  |
| H | -3.036167 | -0.681854 | 2.093043  |
| H | -3.437636 | 0.937815  | 1.486188  |
| H | -5.263280 | 0.097187  | -0.850427 |
| H | -4.042090 | -0.141019 | -2.109629 |
| H | -3.951569 | 1.279325  | -1.059093 |
| H | -1.039962 | 2.549055  | -0.432640 |
| H | 0.012900  | 2.692584  | 1.465090  |
| H | 1.639033  | 3.513540  | 1.176676  |
| H | 4.081051  | -2.064614 | -0.580975 |
| H | 0.348076  | -0.862350 | 2.173907  |
| H | 1.876062  | -1.728442 | 1.958795  |
| H | 1.852685  | 0.038431  | 2.072384  |

B3LYP energy = -737.749718076 a.u.

(1R,5S,6S,7S,10R)-2, Conf. F

|   |           |           |           |
|---|-----------|-----------|-----------|
| C | 3.421786  | 0.432222  | -0.281017 |
| C | 2.670658  | 1.740451  | -0.606481 |
| C | 1.311656  | 1.749198  | 0.057377  |
| C | 0.467131  | 0.547049  | -0.341538 |
| C | 1.168559  | -0.774819 | 0.134091  |
| C | 2.568968  | -0.814457 | -0.553174 |
| C | -1.028450 | 0.637672  | 0.031472  |
| C | -1.823590 | -0.590135 | -0.448866 |
| C | -1.146732 | -1.886878 | 0.038601  |
| C | 0.329285  | -1.971720 | -0.365582 |
| C | -3.341269 | -0.579079 | -0.083731 |
| C | -3.632865 | -0.134199 | 1.360115  |
| C | -4.200879 | 0.219329  | -1.079148 |
| O | -1.620228 | 1.792138  | -0.583580 |
| C | 0.964106  | 2.690649  | 0.947659  |
| O | 3.298363  | -2.008633 | -0.251523 |
| H | 0.485082  | 0.513772  | -1.443996 |
| C | 1.313912  | -0.834666 | 1.669727  |
| H | 3.723877  | 0.445469  | 0.775462  |
| H | 4.341584  | 0.362873  | -0.872216 |
| H | 3.264483  | 2.606194  | -0.295365 |
| H | 2.540412  | 1.812529  | -1.696263 |
| H | 2.391292  | -0.882763 | -1.634414 |
| H | -1.128139 | 0.722469  | 1.123910  |
| H | -1.757219 | -0.581205 | -1.547662 |
| H | -1.684306 | -2.743770 | -0.385116 |
| H | -1.249628 | -1.978196 | 1.127917  |
| H | 0.391138  | -2.007083 | -1.462974 |
| H | 0.776089  | -2.903664 | -0.003271 |
| H | -3.661917 | -1.628680 | -0.164747 |
| H | -4.687376 | -0.306882 | 1.602672  |
| H | -3.035055 | -0.685975 | 2.094984  |
| H | -3.436916 | 0.935421  | 1.492538  |
| H | -5.265582 | 0.101833  | -0.843351 |
| H | -4.046889 | -0.135276 | -2.105081 |
| H | -3.953114 | 1.283017  | -1.052133 |
| H | -1.039665 | 2.550317  | -0.430197 |



|   |          |           |          |
|---|----------|-----------|----------|
| H | 0.016966 | 2.681100  | 1.480062 |
| H | 1.642725 | 3.503415  | 1.192930 |
| H | 3.657058 | -1.938635 | 0.643328 |
| H | 0.342920 | -0.799252 | 2.169767 |
| H | 1.790007 | -1.774884 | 1.970759 |
| H | 1.903434 | -0.003882 | 2.066248 |

B3LYP energy = -737.749394045 a.u.

(1R,5S,6S,7S,10R)-2, Conf. G

|   |           |           |           |
|---|-----------|-----------|-----------|
| C | 3.481840  | -0.007506 | -0.180195 |
| C | 2.982249  | 1.382725  | -0.614414 |
| C | 1.610776  | 1.684611  | -0.045538 |
| C | 0.580888  | 0.612796  | -0.383764 |
| C | 1.048605  | -0.786897 | 0.164530  |
| C | 2.435144  | -1.087912 | -0.467497 |
| C | -0.884233 | 0.937087  | -0.012087 |
| C | -1.859117 | -0.178290 | -0.460879 |
| C | -1.405055 | -1.551827 | 0.064137  |
| C | 0.047036  | -1.864622 | -0.312218 |
| C | -3.341897 | 0.164346  | -0.138540 |
| C | -4.314534 | -0.715269 | -0.942918 |
| C | -3.687526 | 0.111525  | 1.360380  |
| O | -1.291191 | 2.201793  | -0.555951 |
| C | 1.385468  | 2.776459  | 0.695460  |
| O | 2.866414  | -2.372802 | 0.000972  |
| H | 0.592554  | 0.509229  | -1.485887 |
| C | 1.151052  | -0.794660 | 1.705488  |
| H | 3.717462  | -0.008267 | 0.889814  |
| H | 4.412071  | -0.252471 | -0.711857 |
| H | 3.698802  | 2.155374  | -0.317240 |
| H | 2.925457  | 1.408955  | -1.714044 |
| H | 2.283792  | -1.141969 | -1.559879 |
| H | -0.961625 | 1.078941  | 1.071342  |
| H | -1.783762 | -0.211232 | -1.562194 |
| H | -2.055824 | -2.335912 | -0.339569 |
| H | -1.524168 | -1.593476 | 1.152858  |
| H | 0.119881  | -1.948671 | -1.406866 |
| H | 0.346605  | -2.836295 | 0.092821  |
| H | -3.487343 | 1.199105  | -0.469309 |
| H | -4.100891 | -0.669309 | -2.017503 |
| H | -4.266958 | -1.767194 | -0.637147 |
| H | -5.347959 | -0.381503 | -0.795793 |
| H | -4.707937 | 0.475846  | 1.523997  |
| H | -3.020550 | 0.737713  | 1.962572  |
| H | -3.640257 | -0.909829 | 1.755535  |
| H | -1.041894 | 2.234618  | -1.489813 |
| H | 0.404878  | 3.027055  | 1.082228  |
| H | 2.191721  | 3.473845  | 0.910733  |
| H | 3.731349  | -2.567458 | -0.381955 |
| H | 1.772334  | 0.023448  | 2.078004  |
| H | 0.170000  | -0.688517 | 2.175384  |
| H | 1.586306  | -1.739360 | 2.041929  |

B3LYP energy = -737.748394819 a.u.

(1R,5S,6S,7S,10R)-2, Conf. H

|   |          |           |           |
|---|----------|-----------|-----------|
| C | 3.485718 | -0.011023 | -0.198581 |
|---|----------|-----------|-----------|

|   |           |           |           |
|---|-----------|-----------|-----------|
| C | 2.979445  | 1.379745  | -0.620495 |
| C | 1.609744  | 1.683007  | -0.048543 |
| C | 0.578807  | 0.609436  | -0.379416 |
| C | 1.054165  | -0.783757 | 0.178295  |
| C | 2.440202  | -1.088422 | -0.473906 |
| C | -0.885832 | 0.936185  | -0.010324 |
| C | -1.858109 | -0.182030 | -0.456229 |
| C | -1.408759 | -1.545608 | 0.095782  |
| C | 0.044634  | -1.865832 | -0.272855 |
| C | -3.343420 | 0.163713  | -0.151065 |
| C | -4.308950 | -0.726291 | -0.952514 |
| C | -3.702597 | 0.131981  | 1.345233  |
| O | -1.296486 | 2.196594  | -0.560831 |
| C | 1.382754  | 2.776311  | 0.690056  |
| O | 3.004343  | -2.328360 | -0.030994 |
| H | 0.589919  | 0.498136  | -1.481213 |
| C | 1.177938  | -0.778329 | 1.716151  |
| H | 3.734940  | -0.016940 | 0.868347  |
| H | 4.403399  | -0.266800 | -0.739373 |
| H | 3.696315  | 2.151413  | -0.321707 |
| H | 2.919481  | 1.413026  | -1.719904 |
| H | 2.277692  | -1.140484 | -1.564667 |
| H | -0.964416 | 1.078300  | 1.073425  |
| H | -1.773314 | -0.229545 | -1.555848 |
| H | -2.059618 | -2.337619 | -0.291791 |
| H | -1.526220 | -1.563743 | 1.185194  |
| H | 0.113814  | -1.979730 | -1.365788 |
| H | 0.320836  | -2.833491 | 0.167056  |
| H | -3.484260 | 1.193671  | -0.497893 |
| H | -4.085539 | -0.694655 | -2.025579 |
| H | -4.265786 | -1.774149 | -0.632052 |
| H | -5.343362 | -0.389915 | -0.819470 |
| H | -4.723946 | 0.499744  | 1.494168  |
| H | -3.040592 | 0.765828  | 1.944817  |
| H | -3.661170 | -0.883740 | 1.755805  |
| H | -0.953191 | 2.274067  | -1.461318 |
| H | 0.402684  | 3.025059  | 1.079735  |
| H | 2.188044  | 3.475713  | 0.901971  |
| H | 2.462801  | -3.058275 | -0.356657 |
| H | 1.778466  | 0.061500  | 2.072858  |
| H | 0.201775  | -0.703613 | 2.202686  |
| H | 1.653945  | -1.704145 | 2.052258  |

B3LYP energy = -737.748331233 a.u.

(1R,5S,6R,7R,8R,10R)-3, Conf. A

|   |           |           |           |
|---|-----------|-----------|-----------|
| C | 3.983707  | -2.245352 | 0.202929  |
| C | 4.546267  | -0.854366 | 0.559131  |
| C | 3.455314  | 0.103996  | 0.988761  |
| C | 2.332854  | 0.192283  | -0.028443 |
| C | 1.665649  | -1.229329 | -0.254382 |
| C | 2.802175  | -2.154308 | -0.770095 |
| C | 1.217071  | 1.193793  | 0.221331  |
| C | 0.291142  | 1.292242  | -0.998544 |
| C | -0.461898 | -0.008409 | -1.246048 |
| C | 0.561381  | -1.155807 | -1.353116 |

|   |           |           |           |
|---|-----------|-----------|-----------|
| O | 1.650767  | 2.567158  | 0.427512  |
| C | 0.654920  | 3.417799  | 0.012719  |
| C | -0.360386 | 2.628289  | -0.766385 |
| O | 2.236146  | -3.443956 | -1.032222 |
| C | 3.509635  | 0.784105  | 2.139434  |
| C | -1.539678 | 3.129255  | -1.140564 |
| O | 0.672382  | 4.600143  | 0.254878  |
| H | 2.802785  | 0.473094  | -0.986183 |
| C | 1.071066  | -1.801157 | 1.054028  |
| O | -1.392890 | -0.266793 | -0.158917 |
| C | -2.723998 | -0.167204 | -0.409787 |
| O | -3.185889 | 0.115607  | -1.497430 |
| C | -3.530342 | -0.414225 | 0.848623  |
| C | -4.978150 | -0.868504 | 0.594570  |
| C | -5.026543 | -2.272518 | -0.027378 |
| C | -5.786128 | -0.811489 | 1.899556  |
| H | 3.659300  | -2.766542 | 1.110103  |
| H | 4.774949  | -2.858602 | -0.249771 |
| H | 5.048379  | -0.438491 | -0.328109 |
| H | 5.308898  | -0.942664 | 1.339218  |
| H | 3.163699  | -1.725367 | -1.720885 |
| H | 0.643256  | 0.912297  | 1.111151  |
| H | 0.948963  | 1.416565  | -1.874939 |
| H | -1.045414 | 0.047650  | -2.167468 |
| H | 1.048431  | -1.036229 | -2.330775 |
| H | 0.030840  | -2.110757 | -1.393570 |
| H | 2.935760  | -4.036358 | -1.336306 |
| H | 4.349513  | 0.657984  | 2.817989  |
| H | 2.750776  | 1.501088  | 2.431915  |
| H | -2.261516 | 2.545752  | -1.703516 |
| H | -1.796735 | 4.150190  | -0.872913 |
| H | 0.172228  | -1.261610 | 1.354488  |
| H | 1.783477  | -1.752191 | 1.880500  |
| H | 0.794435  | -2.847257 | 0.898159  |
| H | -2.993483 | -1.132414 | 1.479094  |
| H | -3.525339 | 0.537258  | 1.399567  |
| H | -5.421731 | -0.164653 | -0.120381 |
| H | -4.588278 | -3.016608 | 0.650267  |
| H | -6.060776 | -2.573768 | -0.226262 |
| H | -4.482604 | -2.309498 | -0.976244 |
| H | -5.795880 | 0.199169  | 2.323697  |
| H | -5.367158 | -1.487994 | 2.655339  |
| H | -6.825244 | -1.111883 | 1.727223  |

B3LYP energy = -1155.18203143 a.u.

(1R,5S,6R,7R,8R,10R)-**3**, Conf. B

|   |           |           |           |
|---|-----------|-----------|-----------|
| C | 4.364029  | -1.638663 | 0.313483  |
| C | 4.631124  | -0.168450 | 0.695891  |
| C | 3.359118  | 0.560688  | 1.074428  |
| C | 2.285454  | 0.437518  | 0.009593  |
| C | 1.913987  | -1.085121 | -0.239494 |
| C | 3.228033  | -1.768355 | -0.708420 |
| C | 0.988510  | 1.207084  | 0.203492  |
| C | 0.118157  | 1.128441  | -1.057704 |
| C | -0.366096 | -0.290888 | -1.323119 |
| C | 0.861392  | -1.221811 | -1.381926 |

|   |           |           |           |
|---|-----------|-----------|-----------|
| O | 1.143999  | 2.637179  | 0.419324  |
| C | 0.027582  | 3.285499  | -0.051301 |
| C | -0.781549 | 2.319161  | -0.870935 |
| O | 2.933803  | -3.140464 | -0.996544 |
| C | 3.230241  | 1.234178  | 2.222888  |
| C | -2.012743 | 2.588822  | -1.309982 |
| O | -0.188703 | 4.450145  | 0.180296  |
| H | 2.734282  | 0.806717  | -0.928196 |
| C | 1.390822  | -1.770562 | 1.044384  |
| O | -1.269485 | -0.720520 | -0.266849 |
| C | -2.580359 | -0.907573 | -0.569423 |
| O | -3.058371 | -0.684388 | -1.663738 |
| C | -3.331965 | -1.470780 | 0.619675  |
| C | -4.847997 | -1.211019 | 0.594901  |
| C | -5.548919 | -2.069119 | 1.658722  |
| C | -5.168249 | 0.278967  | 0.788200  |
| H | 4.110820  | -2.222908 | 1.204600  |
| H | 5.277170  | -2.081752 | -0.107218 |
| H | 5.083900  | 0.343148  | -0.167587 |
| H | 5.360671  | -0.115691 | 1.510208  |
| H | 3.538060  | -1.267908 | -1.642082 |
| H | 0.439531  | 0.819385  | 1.068488  |
| H | 0.781666  | 1.369935  | -1.904617 |
| H | -0.915552 | -0.347097 | -2.265325 |
| H | 1.354886  | -1.009476 | -2.340555 |
| H | 0.526012  | -2.260715 | -1.437710 |
| H | 3.747723  | -3.584552 | -1.267058 |
| H | 4.046776  | 1.269984  | 2.939540  |
| H | 2.335035  | 1.791298  | 2.475149  |
| H | -2.580888 | 1.876809  | -1.900411 |
| H | -2.471049 | 3.543314  | -1.067622 |
| H | 0.395952  | -1.413219 | 1.312137  |
| H | 2.049822  | -1.597517 | 1.898021  |
| H | 1.322240  | -2.848597 | 0.875711  |
| H | -3.135057 | -2.552518 | 0.612397  |
| H | -2.877828 | -1.087233 | 1.540666  |
| H | -5.215780 | -1.513439 | -0.393366 |
| H | -5.366959 | -3.138058 | 1.498582  |
| H | -5.197014 | -1.816245 | 2.666996  |
| H | -6.632028 | -1.907585 | 1.636940  |
| H | -4.696438 | 0.895596  | 0.017183  |
| H | -4.820832 | 0.631607  | 1.767824  |
| H | -6.248493 | 0.453016  | 0.737279  |

B3LYP energy = -1155.18175660 a.u.

(1R,5S,6R,7R,8R,10R)-**3**, Conf. C

|   |           |           |           |
|---|-----------|-----------|-----------|
| C | 3.996486  | -2.235884 | 0.180580  |
| C | 4.540827  | -0.845630 | 0.566925  |
| C | 3.440172  | 0.097447  | 1.003824  |
| C | 2.326375  | 0.193254  | -0.021714 |
| C | 1.663585  | -1.227208 | -0.264202 |
| C | 2.808754  | -2.152062 | -0.785325 |
| C | 1.211271  | 1.196681  | 0.224038  |
| C | 0.289655  | 1.299095  | -0.998676 |
| C | -0.461147 | -0.001724 | -1.253207 |
| C | 0.566154  | -1.144353 | -1.367447 |

|   |           |           |           |
|---|-----------|-----------|-----------|
| O | 1.646475  | 2.568545  | 0.434925  |
| C | 0.651812  | 3.421309  | 0.020131  |
| C | -0.362234 | 2.634549  | -0.763524 |
| O | 2.339391  | -3.454351 | -1.146110 |
| C | 3.478356  | 0.759792  | 2.165471  |
| C | -1.540789 | 3.136905  | -1.138171 |
| O | 0.669363  | 4.602702  | 0.266037  |
| H | 2.804642  | 0.478002  | -0.974225 |
| C | 1.060890  | -1.804687 | 1.036812  |
| O | -1.389208 | -0.270807 | -0.165390 |
| C | -2.721252 | -0.162515 | -0.410380 |
| O | -3.185415 | 0.131912  | -1.493683 |
| C | -3.525081 | -0.416438 | 0.848244  |
| C | -4.970046 | -0.879915 | 0.593725  |
| C | -5.009048 | -2.282878 | -0.031251 |
| C | -5.778144 | -0.831065 | 1.898906  |
| H | 3.690118  | -2.771899 | 1.089317  |
| H | 4.784142  | -2.835275 | -0.289205 |
| H | 5.045058  | -0.412066 | -0.310338 |
| H | 5.299563  | -0.940191 | 1.350166  |
| H | 3.160475  | -1.727140 | -1.735091 |
| H | 0.632783  | 0.915795  | 1.111055  |
| H | 0.950324  | 1.426665  | -1.872409 |
| H | -1.046278 | 0.058009  | -2.173331 |
| H | 1.059222  | -1.011654 | -2.340106 |
| H | 0.039357  | -2.100700 | -1.426461 |
| H | 2.250672  | -3.990392 | -0.346661 |
| H | 4.312826  | 0.629968  | 2.849955  |
| H | 2.712105  | 1.467738  | 2.461033  |
| H | -2.261768 | 2.555312  | -1.704156 |
| H | -1.798057 | 4.157100  | -0.867924 |
| H | 0.196983  | -1.230101 | 1.372509  |
| H | 1.786276  | -1.824676 | 1.853154  |
| H | 0.702892  | -2.825402 | 0.861490  |
| H | -2.983835 | -1.131707 | 1.478256  |
| H | -3.526749 | 0.534761  | 1.399687  |
| H | -5.418250 | -0.177510 | -0.119690 |
| H | -4.565864 | -3.025525 | 0.644884  |
| H | -6.041170 | -2.590802 | -0.230592 |
| H | -4.465299 | -2.314476 | -0.980485 |
| H | -5.794538 | 0.178538  | 2.325248  |
| H | -5.354795 | -1.506549 | 2.653190  |
| H | -6.815247 | -1.137861 | 1.725938  |

B3LYP energy = -1155.18150642 a.u.

(1R,5S,6R,7R,8R,10R)-3, Conf. D

|   |           |           |           |
|---|-----------|-----------|-----------|
| C | 4.045343  | -2.132084 | 0.193156  |
| C | 4.571068  | -0.729065 | 0.557814  |
| C | 3.454720  | 0.196848  | 0.992598  |
| C | 2.330934  | 0.262671  | -0.024834 |
| C | 1.700867  | -1.174808 | -0.261935 |
| C | 2.862102  | -2.067296 | -0.780141 |
| C | 1.188708  | 1.232197  | 0.232057  |
| C | 0.259913  | 1.309454  | -0.986746 |
| C | -0.457448 | -0.005204 | -1.244619 |
| C | 0.596918  | -1.125075 | -1.362699 |

|   |           |           |           |
|---|-----------|-----------|-----------|
| O | 1.582094  | 2.618003  | 0.441650  |
| C | 0.559697  | 3.439731  | 0.033272  |
| C | -0.432607 | 2.621270  | -0.745840 |
| O | 2.329876  | -3.370140 | -1.047106 |
| C | 3.489027  | 0.870657  | 2.147751  |
| C | -1.633288 | 3.076165  | -1.107308 |
| O | 0.541132  | 4.621261  | 0.278720  |
| H | 2.793232  | 0.562455  | -0.980426 |
| C | 1.118328  | -1.769384 | 1.041763  |
| O | -1.386327 | -0.251281 | -0.154341 |
| C | -2.603370 | -0.773183 | -0.460243 |
| O | -2.966898 | -1.007984 | -1.594766 |
| C | -3.403072 | -1.045515 | 0.797498  |
| C | -4.918138 | -1.182548 | 0.571495  |
| C | -5.590869 | -1.745780 | 1.832265  |
| C | -5.551839 | 0.154709  | 0.157969  |
| H | 3.734683  | -2.666790 | 1.097222  |
| H | 4.852605  | -2.721750 | -0.262486 |
| H | 5.062274  | -0.294717 | -0.326664 |
| H | 5.335384  | -0.801653 | 1.337835  |
| H | 3.212652  | -1.625359 | -1.729011 |
| H | 0.624781  | 0.932345  | 1.121909  |
| H | 0.914517  | 1.459146  | -1.861391 |
| H | -1.040684 | 0.032640  | -2.167598 |
| H | 1.080494  | -0.984387 | -2.339408 |
| H | 0.093494  | -2.094023 | -1.413980 |
| H | 3.043104  | -3.941513 | -1.359610 |
| H | 4.330992  | 0.763378  | 2.826924  |
| H | 2.710413  | 1.564796  | 2.443581  |
| H | -2.332766 | 2.468075  | -1.672930 |
| H | -1.936083 | 4.083196  | -0.835956 |
| H | 0.208844  | -1.249772 | 1.346001  |
| H | 1.828186  | -1.711573 | 1.869868  |
| H | 0.865191  | -2.820232 | 0.877682  |
| H | -2.998192 | -1.978077 | 1.216197  |
| H | -3.179593 | -0.263663 | 1.533092  |
| H | -5.063833 | -1.895663 | -0.249284 |
| H | -5.177272 | -2.722803 | 2.107530  |
| H | -5.456711 | -1.071691 | 2.687816  |
| H | -6.667696 | -1.870687 | 1.675992  |
| H | -6.626986 | 0.036889  | -0.015880 |
| H | -5.108338 | 0.540760  | -0.764843 |
| H | -5.423664 | 0.909242  | 0.944915  |

B3LYP energy = -1155.18142467 a.u.

(1R,5S,6R,7R,8R,10R)-3, Conf. E

|   |           |           |           |
|---|-----------|-----------|-----------|
| C | 4.376046  | -1.627006 | 0.294212  |
| C | 4.625503  | -0.160589 | 0.702051  |
| C | 3.347436  | 0.553789  | 1.086616  |
| C | 2.280289  | 0.438019  | 0.014907  |
| C | 1.912991  | -1.082632 | -0.248192 |
| C | 3.235034  | -1.766385 | -0.720474 |
| C | 0.983727  | 1.209476  | 0.205192  |
| C | 0.115994  | 1.134968  | -1.057954 |
| C | -0.364717 | -0.284447 | -1.330843 |
| C | 0.866481  | -1.209413 | -1.395715 |

|   |           |           |           |
|---|-----------|-----------|-----------|
| O | 1.140376  | 2.638460  | 0.425309  |
| C | 0.023733  | 3.288312  | -0.043750 |
| C | -0.784669 | 2.324506  | -0.867333 |
| O | 3.039513  | -3.132251 | -1.098578 |
| C | 3.208030  | 1.210672  | 2.243495  |
| C | -2.015513 | 2.595853  | -1.306339 |
| O | -0.193141 | 4.451819  | 0.192159  |
| H | 2.735423  | 0.811556  | -0.918210 |
| C | 1.381933  | -1.772500 | 1.028814  |
| O | -1.264032 | -0.725672 | -0.275143 |
| C | -2.577380 | -0.904691 | -0.574186 |
| O | -3.058865 | -0.667201 | -1.663663 |
| C | -3.326303 | -1.479200 | 0.611276  |
| C | -4.842212 | -1.217929 | 0.593112  |
| C | -5.541146 | -2.087122 | 1.649214  |
| C | -5.160571 | 0.270169  | 0.803340  |
| H | 4.142067  | -2.219516 | 1.189176  |
| H | 5.283421  | -2.059059 | -0.142156 |
| H | 5.076445  | 0.366087  | -0.152993 |
| H | 5.352911  | -0.113392 | 1.518690  |
| H | 3.536588  | 1.274266  | -1.654814 |
| H | 0.430781  | 0.821585  | 1.067632  |
| H | 0.780716  | 1.381008  | -1.902586 |
| H | -0.915450 | -0.337046 | -2.272473 |
| H | 1.364059  | -0.982795 | -2.348697 |
| H | 0.536424  | -2.249138 | -1.470211 |
| H | 3.042257  | -3.682694 | -0.304149 |
| H | 4.020693  | 1.242815  | 2.964703  |
| H | 2.308158  | 1.759291  | 2.498204  |
| H | -2.583306 | 1.886155  | -1.899831 |
| H | -2.473708 | 3.549594  | -1.060828 |
| H | 0.416161  | -1.369408 | 1.335081  |
| H | 2.069071  | -1.667613 | 1.871376  |
| H | 1.224360  | -2.839926 | 0.837648  |
| H | -3.130751 | -2.561088 | 0.592834  |
| H | -2.869788 | -1.104868 | 1.534937  |
| H | -5.212607 | -1.509277 | -0.397470 |
| H | -5.360415 | -3.154414 | 1.476974  |
| H | -5.186903 | -1.845424 | 2.659421  |
| H | -6.624160 | -1.924719 | 1.631661  |
| H | -6.240792 | 0.445603  | 0.757676  |
| H | -4.690729 | 0.894622  | 0.037451  |
| H | -4.809853 | 0.611996  | 1.785618  |

B3LYP energy = -1155.18124773 a.u.

(1R,5S,6R,7R,8R,10R)-**3**, Conf. F

|   |           |           |           |
|---|-----------|-----------|-----------|
| C | 3.468506  | -2.621053 | -0.021604 |
| C | 4.216492  | -1.359681 | 0.455387  |
| C | 3.266425  | -0.296068 | 0.964319  |
| C | 2.182795  | 0.039130  | -0.044057 |
| C | 1.325677  | -1.248243 | -0.395317 |
| C | 2.326519  | -2.278150 | -0.986144 |
| C | 1.213255  | 1.163366  | 0.286709  |
| C | 0.328802  | 1.494059  | -0.923306 |
| C | -0.594865 | 0.339125  | -1.288511 |
| C | 0.261505  | -0.926346 | -1.488709 |

|   |           |           |           |
|---|-----------|-----------|-----------|
| O | 1.832518  | 2.439014  | 0.610669  |
| C | 0.972209  | 3.454119  | 0.267033  |
| C | -0.132336 | 2.884140  | -0.578619 |
| O | 1.587040  | -3.446268 | -1.362171 |
| C | 3.397903  | 0.269907  | 2.169104  |
| C | -1.225308 | 3.574519  | -0.910906 |
| O | 1.153315  | 4.597336  | 0.609104  |
| H | 2.702243  | 0.332245  | -0.972253 |
| C | 0.635391  | -1.839643 | 0.856038  |
| O | -1.575577 | 0.121485  | -0.237579 |
| C | -2.876952 | 0.419359  | -0.495345 |
| O | -3.265308 | 0.882008  | -1.549998 |
| C | -3.756237 | 0.093530  | 0.691218  |
| C | -3.888164 | -1.423135 | 0.979009  |
| C | -4.703942 | -1.638782 | 2.262124  |
| C | -4.510037 | -2.176126 | -0.206393 |
| H | 3.059438  | -3.166941 | 0.835443  |
| H | 4.171697  | -3.299082 | -0.524345 |
| H | 4.784341  | -0.945335 | -0.391953 |
| H | 4.948135  | -1.621495 | 1.226175  |
| H | 2.760307  | -1.825231 | -1.894576 |
| H | 0.592568  | 0.891922  | 1.147719  |
| H | 1.011887  | 1.599022  | -1.782732 |
| H | -1.145511 | 0.557430  | -2.206097 |
| H | 0.777185  | -0.792831 | -2.449742 |
| H | -0.394525 | -1.791505 | -1.615210 |
| H | 2.200929  | -4.106260 | -1.709114 |
| H | 4.200384  | -0.029561 | 2.838347  |
| H | 2.742240  | 1.060176  | 2.517022  |
| H | -2.013398 | 3.145997  | -1.522066 |
| H | -1.341978 | 4.595061  | -0.557588 |
| H | -0.178848 | -1.202598 | 1.203598  |
| H | 1.335199  | -1.970343 | 1.684468  |
| H | 0.211209  | -2.816095 | 0.607310  |
| H | -3.335508 | 0.591195  | 1.572821  |
| H | -4.740935 | 0.525599  | 0.489741  |
| H | -2.877533 | -1.816811 | 1.146941  |
| H | -4.244662 | -1.135370 | 3.120276  |
| H | -5.723716 | -1.249970 | 2.150413  |
| H | -4.779762 | -2.705337 | 2.500011  |
| H | -4.581700 | -3.247095 | 0.011944  |
| H | -3.919978 | -2.061822 | -1.121801 |
| H | -5.521438 | -1.807720 | -0.417122 |

B3LYP energy = -1155.18106152 a.u.

(1R,5S,6R,7R,8R,10R)-**3**, Conf. G

|   |           |           |           |
|---|-----------|-----------|-----------|
| C | 3.994383  | -2.237618 | 0.204786  |
| C | 4.542464  | -0.846348 | 0.577087  |
| C | 3.447396  | 0.109237  | 1.000891  |
| C | 2.331351  | 0.196559  | -0.023422 |
| C | 1.671788  | -1.228153 | -0.250857 |
| C | 2.820039  | -2.152127 | -0.770051 |
| C | 1.212941  | 1.196492  | 0.220898  |
| C | 0.291292  | 1.292226  | -1.002380 |
| C | -0.462075 | -0.008047 | -1.246510 |
| C | 0.564506  | -1.155295 | -1.346605 |

|   |           |           |           |
|---|-----------|-----------|-----------|
| O | 1.642031  | 2.571393  | 0.426799  |
| C | 0.646239  | 3.419386  | 0.007553  |
| C | -0.364202 | 2.626965  | -0.775399 |
| O | 2.386225  | -3.496713 | -1.005814 |
| C | 3.490677  | 0.789317  | 2.152060  |
| C | -1.542959 | 3.124118  | -1.155959 |
| O | 0.658950  | 4.601909  | 0.248192  |
| H | 2.806884  | 0.478456  | -0.978494 |
| C | 1.080289  | -1.807690 | 1.053833  |
| O | -1.391641 | -0.264146 | -0.160159 |
| C | -2.724400 | -0.180925 | -0.416751 |
| O | -3.183476 | 0.074254  | -1.512012 |
| C | -3.531061 | -0.407333 | 0.844684  |
| C | -4.977238 | -0.871087 | 0.598452  |
| C | -5.020872 | -2.286217 | 0.001943  |
| C | -5.785130 | -0.793190 | 1.902419  |
| H | 3.668396  | -2.770693 | 1.104513  |
| H | 4.780398  | -2.846766 | -0.253910 |
| H | 5.053694  | -0.422298 | -0.301282 |
| H | 5.296943  | -0.936601 | 1.364834  |
| H | 3.184073  | -1.721306 | -1.718374 |
| H | 0.636466  | 0.914227  | 1.108868  |
| H | 0.951531  | 1.414904  | -1.877232 |
| H | -1.044324 | 0.043435  | -2.169117 |
| H | 1.046640  | -1.036687 | -2.328491 |
| H | 0.015897  | -2.103358 | -1.374445 |
| H | 1.860723  | -3.530911 | -1.814776 |
| H | 4.325441  | 0.664306  | 2.837033  |
| H | 2.728295  | 1.504636  | 2.439555  |
| H | -2.260514 | 2.538814  | -1.722609 |
| H | -1.804374 | 4.144607  | -0.890942 |
| H | 0.165803  | -1.290337 | 1.346679  |
| H | 1.785856  | -1.739557 | 1.884373  |
| H | 0.834084  | -2.862433 | 0.900412  |
| H | -2.992019 | -1.111394 | 1.489133  |
| H | -3.529118 | 0.554250  | 1.377810  |
| H | -5.423322 | -0.181717 | -0.128942 |
| H | -4.579759 | -3.016471 | 0.692655  |
| H | -6.054081 | -2.594668 | -0.190802 |
| H | -4.477626 | -2.338011 | -0.946676 |
| H | -5.798128 | 0.224882  | 2.308272  |
| H | -5.363869 | -1.454614 | 2.670139  |
| H | -6.823260 | -1.099901 | 1.735727  |

B3LYP energy = -1155.18097793 a.u.

(1R,5S,6R,7R,8R,10R)-3, Conf. H

|   |           |           |           |
|---|-----------|-----------|-----------|
| C | 4.375889  | -1.624444 | 0.314491  |
| C | 4.626562  | -0.155927 | 0.709580  |
| C | 3.350861  | 0.568904  | 1.082422  |
| C | 2.282621  | 0.442439  | 0.012552  |
| C | 1.921163  | -1.082607 | -0.234671 |
| C | 3.246752  | -1.761598 | -0.707043 |
| C | 0.983013  | 1.208624  | 0.201802  |
| C | 0.115327  | 1.124845  | -1.060893 |
| C | -0.367624 | -0.295397 | -1.319900 |
| C | 0.864280  | -1.223491 | -1.372743 |

|   |           |           |           |
|---|-----------|-----------|-----------|
| O | 1.132222  | 2.639874  | 0.414405  |
| C | 0.014855  | 3.283329  | -0.059671 |
| C | -0.788992 | 2.312702  | -0.879957 |
| O | 3.092381  | -3.162936 | -0.960321 |
| C | 3.212296  | 1.242582  | 2.229672  |
| C | -2.019468 | 2.577093  | -1.323949 |
| O | -0.207103 | 4.447375  | 0.168604  |
| H | 2.734667  | 0.812895  | -0.923649 |
| C | 1.405822  | -1.773757 | 1.047634  |
| O | -1.267012 | -0.722869 | -0.261977 |
| C | -2.577113 | -0.924291 | -0.565417 |
| O | -3.050789 | -0.725104 | -1.665882 |
| C | -3.328625 | -1.469276 | 0.631655  |
| C | -4.845270 | -1.212701 | 0.601160  |
| C | -5.544900 | -2.054047 | 1.679127  |
| C | -5.168198 | 0.279742  | 0.769447  |
| H | 4.126010  | -2.219548 | 1.199433  |
| H | 5.283354  | -2.063829 | -0.112980 |
| H | 5.084700  | 0.364484  | -0.146024 |
| H | 5.349089  | -0.104397 | 1.530211  |
| H | 3.556499  | -1.260289 | -1.639631 |
| H | 0.433668  | 0.820337  | 1.066431  |
| H | 0.779568  | 1.364747  | -1.907743 |
| H | -0.916734 | -0.358068 | -2.262019 |
| H | 1.351580  | -1.012152 | -2.336511 |
| H | 0.511180  | -2.259767 | -1.416256 |
| H | 2.623292  | -3.292115 | -1.793923 |
| H | 4.024577  | 1.280754  | 2.950949  |
| H | 2.314016  | 1.796915  | 2.477282  |
| H | -2.583422 | 1.862778  | -1.915697 |
| H | -2.481993 | 3.530418  | -1.085141 |
| H | 0.398937  | -1.444657 | 1.307380  |
| H | 2.054683  | -1.578291 | 1.903795  |
| H | 1.372517  | -2.855186 | 0.885567  |
| H | -3.130133 | -2.550757 | 0.642196  |
| H | -2.876005 | -1.070010 | 1.546582  |
| H | -5.211939 | -1.532560 | -0.382034 |
| H | -6.628137 | -1.894192 | 1.654613  |
| H | -5.361689 | -3.125273 | 1.536830  |
| H | -5.193346 | -1.783923 | 2.682989  |
| H | -6.248726 | 0.450728  | 0.715527  |
| H | -4.697737 | 0.884676  | -0.011643 |
| H | -4.821566 | 0.649210  | 1.743056  |

B3LYP energy = -1155.18069142 a.u.

(1R,5S,6R,7R,8R,10R)-3, Conf. I

|   |           |           |           |
|---|-----------|-----------|-----------|
| C | 3.965904  | -2.221436 | 0.181186  |
| C | 4.528519  | -0.836174 | 0.553894  |
| C | 3.444602  | 0.127049  | 0.988939  |
| C | 2.322834  | 0.228722  | -0.027584 |
| C | 1.649176  | -1.189109 | -0.258746 |
| C | 2.785948  | -2.123199 | -0.785730 |
| C | 1.214538  | 1.236389  | 0.230643  |
| C | 0.283135  | 1.341670  | -0.984164 |
| C | -0.479829 | 0.052057  | -1.232268 |
| C | 0.538515  | -1.103358 | -1.349871 |

|   |           |           |           |
|---|-----------|-----------|-----------|
| O | 1.654201  | 2.608992  | 0.434147  |
| C | 0.659120  | 3.463534  | 0.027456  |
| C | -0.363800 | 2.677206  | -0.745706 |
| O | 2.338538  | -3.463095 | -1.019768 |
| C | 3.501407  | 0.802029  | 2.142555  |
| C | -1.548155 | 3.174475  | -1.104582 |
| O | 0.680347  | 4.645673  | 0.268931  |
| H | 2.794138  | 0.511762  | -0.984368 |
| C | 1.058076  | -1.766786 | 1.046961  |
| O | -1.412243 | -0.148778 | -0.137974 |
| C | -2.575140 | -0.795944 | -0.414557 |
| O | -2.868652 | -1.193733 | -1.523944 |
| C | -3.408024 | -0.976167 | 0.837495  |
| C | -4.915057 | -1.143802 | 0.575239  |
| C | -5.626221 | -1.602365 | 1.857125  |
| C | -5.538711 | 0.149226  | 0.028330  |
| H | 3.641487  | -2.754422 | 1.081555  |
| H | 4.743511  | -2.836081 | -0.284434 |
| H | 5.036839  | -0.413441 | -0.326799 |
| H | 5.288015  | -0.935439 | 1.335739  |
| H | 3.147811  | -1.694079 | -1.735684 |
| H | 0.644609  | 0.957240  | 1.123444  |
| H | 0.938040  | 1.465692  | -1.862607 |
| H | -1.063842 | 0.102476  | -2.154708 |
| H | 1.015896  | -0.979264 | -2.333440 |
| H | -0.016873 | -2.046475 | -1.387910 |
| H | 1.793561  | -3.489482 | -1.816206 |
| H | 4.339670  | 0.666986  | 2.821303  |
| H | 2.747122  | 1.522612  | 2.438266  |
| H | -2.272728 | 2.592086  | -1.665520 |
| H | -1.812090 | 4.192798  | -0.834923 |
| H | 0.160885  | -1.228400 | 1.356403  |
| H | 1.773533  | -1.722625 | 1.870643  |
| H | 0.786041  | -2.814318 | 0.887620  |
| H | -3.012293 | -1.872608 | 1.336365  |
| H | -3.212782 | -0.138768 | 1.517184  |
| H | -5.029963 | -1.925511 | -0.185711 |
| H | -5.523908 | -0.856748 | 2.655818  |
| H | -6.696634 | -1.748593 | 1.677105  |
| H | -5.217524 | -2.549129 | 2.228637  |
| H | -5.063721 | 0.458531  | -0.907917 |
| H | -5.440971 | 0.968459  | 0.752235  |
| H | -6.606359 | 0.010169  | -0.172908 |

B3LYP energy = -1155.18063980 a.u.

(1R,5S,6R,7R,8R,10R)-**3**, Conf. J

|   |           |           |           |
|---|-----------|-----------|-----------|
| C | 4.361831  | -1.203177 | 0.419320  |
| C | 4.424041  | 0.277062  | 0.847887  |
| C | 3.051484  | 0.836886  | 1.158404  |
| C | 2.068774  | 0.616539  | 0.023719  |
| C | 1.900670  | -0.931269 | -0.281318 |
| C | 3.314583  | -1.440524 | -0.675768 |
| C | 0.678404  | 1.218824  | 0.149152  |
| C | -0.095394 | 1.070799  | -1.167786 |
| C | -0.386818 | -0.387018 | -1.495228 |
| C | 0.947153  | -1.159428 | -1.494802 |

|   |           |           |           |
|---|-----------|-----------|-----------|
| O | 0.643803  | 2.650972  | 0.402902  |
| C | -0.509132 | 3.174870  | -0.130256 |
| C | -1.138752 | 2.144176  | -1.025187 |
| O | 3.206306  | -2.830066 | -1.006773 |
| C | 2.771248  | 1.457802  | 2.309643  |
| C | -2.354890 | 2.284703  | -1.557014 |
| O | -0.879919 | 4.297987  | 0.110696  |
| H | 2.526845  | 1.063639  | -0.874829 |
| C | 1.383680  | -1.709232 | 0.951266  |
| O | -1.294515 | -0.965262 | -0.517260 |
| C | -2.543713 | -1.319023 | -0.922280 |
| O | -2.972478 | -1.110080 | -2.039984 |
| C | -3.302292 | -2.013566 | 0.188052  |
| C | -3.640739 | -1.114804 | 1.402962  |
| C | -4.578181 | 0.038031  | 1.015227  |
| C | -4.251513 | -1.969120 | 2.523964  |
| H | 4.127953  | -1.838395 | 1.280392  |
| H | 5.346229  | -1.520859 | 0.049141  |
| H | 4.862828  | 0.863879  | 0.026019  |
| H | 5.090278  | 0.394864  | 1.708251  |
| H | 3.619788  | -0.883068 | -1.578302 |
| H | 0.128343  | 0.745030  | 0.969646  |
| H | 0.588138  | 1.410740  | -1.963534 |
| H | -0.863419 | -0.477936 | -2.473721 |
| H | 1.471433  | -0.858805 | -2.412417 |
| H | 0.747002  | -2.229204 | -1.597000 |
| H | 4.082868  | -3.166697 | -1.232896 |
| H | 3.531784  | 1.571579  | 3.077961  |
| H | 1.801056  | 1.895961  | 2.515597  |
| H | -2.790508 | 1.529681  | -2.204291 |
| H | -2.937323 | 3.174913  | -1.337111 |
| H | 1.456550  | -2.782697 | 0.757331  |
| H | 0.338027  | -1.480466 | 1.159950  |
| H | 1.962897  | -1.481757 | 1.848900  |
| H | -4.221668 | -2.409895 | -0.253077 |
| H | -2.692480 | -2.859202 | 0.527902  |
| H | -2.700006 | -0.687502 | 1.773532  |
| H | -4.138691 | 0.683093  | 0.248003  |
| H | -5.528817 | -0.346075 | 0.625429  |
| H | -4.800969 | 0.663862  | 1.886050  |
| H | -3.570558 | -2.767759 | 2.839090  |
| H | -5.188500 | -2.435966 | 2.195520  |
| H | -4.477327 | -1.354550 | 3.402055  |

B3LYP energy = -1155.18051777 a.u.

(1R,5S,6R,7R,8R,10R)-**3**, Conf. K

|   |           |           |           |
|---|-----------|-----------|-----------|
| C | 3.491452  | -2.608474 | -0.041247 |
| C | 4.221144  | -1.344857 | 0.457495  |
| C | 3.259740  | -0.294954 | 0.972497  |
| C | 2.180913  | 0.041662  | -0.039954 |
| C | 1.329670  | -1.246269 | -0.400200 |
| C | 2.338197  | -2.277788 | -0.996263 |
| C | 1.210526  | 1.166153  | 0.287727  |
| C | 0.326821  | 1.496057  | -0.922979 |
| C | -0.592843 | 0.338302  | -1.290842 |
| C | 0.270253  | -0.921474 | -1.495516 |

|   |           |           |           |
|---|-----------|-----------|-----------|
| O | 1.828576  | 2.441793  | 0.612688  |
| C | 0.966386  | 3.456031  | 0.269975  |
| C | -0.136904 | 2.885159  | -0.576883 |
| O | 1.692709  | -3.466761 | -1.462286 |
| C | 3.377251  | 0.259278  | 2.184205  |
| C | -1.230077 | 3.575001  | -0.909603 |
| O | 1.145165  | 4.598928  | 0.613823  |
| H | 2.704407  | 0.335546  | -0.965722 |
| C | 0.635714  | -1.838382 | 0.847640  |
| O | -1.571013 | 0.110874  | -0.238727 |
| C | -2.872376 | 0.416689  | -0.489267 |
| O | -3.262409 | 0.888530  | -1.538931 |
| C | -3.749330 | 0.086573  | 0.697934  |
| C | -3.895423 | -1.431600 | 0.970093  |
| C | -4.710020 | -1.652756 | 2.253043  |
| C | -4.527756 | -2.165982 | -0.221511 |
| H | 3.101083  | -3.168016 | 0.820016  |
| H | 4.192239  | -3.272605 | -0.559118 |
| H | 4.789266  | -0.916722 | -0.382474 |
| H | 4.951632  | -1.608547 | 1.228814  |
| H | 2.757385  | -1.830708 | -1.907755 |
| H | 0.588239  | 0.895929  | 1.148049  |
| H | 1.010562  | 1.603594  | -1.781533 |
| H | -1.145901 | 0.557074  | -2.206821 |
| H | 0.791174  | -0.777902 | -2.452023 |
| H | -0.379690 | -1.789350 | -1.636419 |
| H | 1.541218  | -4.057317 | -0.712354 |
| H | 4.177144  | -0.040257 | 2.856500  |
| H | 2.713206  | 1.041487  | 2.534703  |
| H | -2.017272 | 3.146721  | -1.521998 |
| H | -1.347622 | 4.595130  | -0.555363 |
| H | -0.145857 | -1.179649 | 1.227982  |
| H | 1.340336  | -2.024494 | 1.661366  |
| H | 0.145261  | -2.783278 | 0.588211  |
| H | -3.320504 | 0.570976  | 1.582974  |
| H | -4.730755 | 0.529752  | 0.504988  |
| H | -2.888056 | -1.836742 | 1.131559  |
| H | -4.796914 | -2.720980 | 2.479466  |
| H | -4.243462 | -1.163537 | 3.115439  |
| H | -5.725795 | -1.251955 | 2.148130  |
| H | -3.939146 | -2.048246 | -1.137409 |
| H | -5.535606 | -1.784698 | -0.425830 |
| H | -4.610824 | -3.238320 | -0.013987 |

B3LYP energy = -1155.18045736 a.u.

(1R,5S,6R,7R,8R,10R)-3, Conf. L

|   |           |           |           |
|---|-----------|-----------|-----------|
| C | 4.304773  | -1.429254 | 0.398235  |
| C | 4.515064  | 0.067996  | 0.701302  |
| C | 3.213134  | 0.766285  | 1.033738  |
| C | 2.153339  | 0.547044  | -0.029469 |
| C | 1.840223  | -0.999065 | -0.203228 |
| C | 3.183520  | -1.657437 | -0.622919 |
| C | 0.826875  | 1.274857  | 0.119833  |
| C | -0.031517 | 1.094990  | -1.139443 |
| C | -0.458062 | -0.350112 | -1.338078 |
| C | 0.806351  | -1.234381 | -1.347011 |

|   |           |           |           |
|---|-----------|-----------|-----------|
| O | 0.921312  | 2.720580  | 0.259160  |
| C | -0.218375 | 3.295572  | -0.247493 |
| C | -0.980313 | 2.254323  | -1.020319 |
| O | 2.942290  | -3.053271 | -0.833925 |
| C | 3.049600  | 1.491648  | 2.145761  |
| C | -2.216629 | 2.447147  | -1.482147 |
| O | -0.487013 | 4.459971  | -0.077955 |
| H | 2.594412  | 0.884476  | -0.982665 |
| C | 1.327437  | -1.635535 | 1.109936  |
| O | -1.367737 | -0.719166 | -0.267070 |
| C | -2.389371 | -1.566560 | -0.566140 |
| O | -2.594164 | -1.998984 | -1.682582 |
| C | -3.217361 | -1.879368 | 0.660542  |
| C | -4.089641 | -0.696536 | 1.152629  |
| C | -5.123738 | -0.273585 | 0.098996  |
| C | -4.771937 | -1.071561 | 2.476421  |
| H | 4.064447  | -1.972114 | 1.318595  |
| H | 5.237085  | -1.861302 | 0.009575  |
| H | 4.953585  | 0.549298  | -0.186645 |
| H | 5.236412  | 0.192554  | 1.515044  |
| H | 3.483057  | -1.198746 | -1.581156 |
| H | 0.289183  | 0.912392  | 1.002347  |
| H | 0.627778  | 1.321391  | -1.993660 |
| H | -0.991363 | -0.485224 | -2.282107 |
| H | 1.299872  | -1.048164 | -2.311093 |
| H | 0.512866  | -2.286963 | -1.358920 |
| H | 3.771589  | -3.480081 | -1.084684 |
| H | 3.859001  | 1.595298  | 2.863874  |
| H | 2.131756  | 2.025256  | 2.365766  |
| H | -2.745691 | 1.684830  | -2.045930 |
| H | -2.723950 | 3.389466  | -1.297635 |
| H | 0.320716  | -1.292850 | 1.352736  |
| H | 1.973110  | -1.400860 | 1.959170  |
| H | 1.292562  | -2.722262 | 0.995406  |
| H | -3.852843 | -2.734134 | 0.410180  |
| H | -2.535337 | -2.179170 | 1.464495  |
| H | -3.420477 | 0.152637  | 1.342036  |
| H | -5.714328 | 0.576303  | 0.457691  |
| H | -4.652993 | 0.021517  | -0.844368 |
| H | -5.816160 | -1.095105 | -0.121874 |
| H | -5.374237 | -0.237865 | 2.853297  |
| H | -4.037873 | -1.330492 | 3.247627  |
| H | -5.439912 | -1.931926 | 2.344990  |

B3LYP energy = -1155.18021605 a.u.

(1R,5S,6R,7R,8R,10R)-3, Conf. M

|   |           |           |           |
|---|-----------|-----------|-----------|
| C | 3.490881  | -2.603210 | -0.020807 |
| C | 4.217947  | -1.338400 | 0.475343  |
| C | 3.258010  | -0.281369 | 0.978566  |
| C | 2.180911  | 0.049476  | -0.038046 |
| C | 1.336957  | -1.244829 | -0.394373 |
| C | 2.354572  | -2.270399 | -0.988244 |
| C | 1.203520  | 1.168397  | 0.287481  |
| C | 0.323631  | 1.494710  | -0.926958 |
| C | -0.594858 | 0.336682  | -1.292515 |
| C | 0.269934  | -0.926025 | -1.486085 |

|   |           |           |           |
|---|-----------|-----------|-----------|
| O | 1.812795  | 2.448086  | 0.614633  |
| C | 0.948834  | 3.458113  | 0.266612  |
| C | -0.147624 | 2.882052  | -0.585845 |
| O | 1.741820  | -3.515653 | -1.343259 |
| C | 3.374398  | 0.284636  | 2.184911  |
| C | -1.242632 | 3.565682  | -0.925022 |
| O | 1.120176  | 4.602411  | 0.609489  |
| H | 2.706127  | 0.346400  | -0.962222 |
| C | 0.649729  | -1.849065 | 0.850646  |
| O | -1.574971 | 0.114598  | -0.244419 |
| C | -2.879667 | 0.398147  | -0.509092 |
| O | -3.268074 | 0.840325  | -1.572135 |
| C | -3.757764 | 0.084174  | 0.680978  |
| C | -3.879270 | -1.428933 | 0.991922  |
| C | -4.691532 | -1.630357 | 2.279521  |
| C | -4.498205 | -2.203908 | -0.180810 |
| H | 3.080404  | -3.163462 | 0.826328  |
| H | 4.193075  | -3.272005 | -0.529562 |
| H | 4.795193  | -0.914013 | -0.360877 |
| H | 4.941251  | -1.599641 | 1.254164  |
| H | 2.789906  | -1.814003 | -1.893451 |
| H | 0.579723  | 0.892632  | 1.144989  |
| H | 1.009863  | 1.601924  | -1.783676 |
| H | -1.144073 | 0.549871  | -2.212270 |
| H | 0.781931  | -0.789265 | -2.450310 |
| H | -0.399915 | -1.785238 | -1.601906 |
| H | 1.242628  | -3.409112 | -2.162402 |
| H | 4.172153  | -0.011360 | 2.861239  |
| H | 2.711192  | 1.070750  | 2.528053  |
| H | -2.024476 | 3.133210  | -1.541467 |
| H | -1.367667 | 4.585484  | -0.572504 |
| H | -0.185065 | -1.234243 | 1.189955  |
| H | 1.345898  | -1.960213 | 1.684536  |
| H | 0.257288  | -2.839150 | 0.600801  |
| H | -3.341412 | 0.598112  | 1.555199  |
| H | -4.745160 | 0.506241  | 0.471848  |
| H | -2.865836 | -1.813337 | 1.164590  |
| H | -4.759918 | -2.693599 | 2.533602  |
| H | -4.233856 | -1.111148 | 3.128991  |
| H | -5.713917 | -1.249800 | 2.163795  |
| H | -4.560290 | -3.272212 | 0.052832  |
| H | -3.912372 | -2.097152 | -1.100022 |
| H | -5.513277 | -1.847249 | -0.393839 |

B3LYP energy = -1155.17997755 a.u.

(1R,5S,6R,7R,8R,10R)-**3**, Conf. N

|   |           |           |           |
|---|-----------|-----------|-----------|
| C | 4.377742  | -1.178509 | 0.399290  |
| C | 4.415204  | 0.293596  | 0.858229  |
| C | 3.035474  | 0.830754  | 1.174581  |
| C | 2.061383  | 0.619588  | 0.031254  |
| C | 1.903538  | -0.925140 | -0.291765 |
| C | 3.327803  | -1.426404 | -0.690551 |
| C | 0.669501  | 1.219298  | 0.152723  |
| C | -0.099612 | 1.076570  | -1.167396 |
| C | -0.383532 | -0.380970 | -1.504059 |
| C | 0.955681  | -1.143715 | -1.509864 |

|   |           |           |           |
|---|-----------|-----------|-----------|
| O | 0.632037  | 2.649608  | 0.414191  |
| C | -0.521314 | 3.173722  | -0.118710 |
| C | -1.146414 | 2.146352  | -1.020845 |
| O | 3.328694  | -2.794050 | -1.110173 |
| C | 2.741048  | 1.424700  | 2.336452  |
| C | -2.361840 | 2.287503  | -1.554174 |
| O | -0.895633 | 4.294239  | 0.128060  |
| H | 2.524879  | 1.075521  | -0.860137 |
| C | 1.383463  | -1.713151 | 0.931828  |
| O | -1.284544 | -0.973314 | -0.527416 |
| C | -2.538604 | -1.316825 | -0.927866 |
| O | -2.974127 | -1.092173 | -2.039603 |
| C | -3.292719 | -2.021204 | 0.179375  |
| C | -3.631973 | -1.130478 | 1.400130  |
| C | -4.573231 | 0.021948  | 1.020473  |
| C | -4.238774 | -1.993074 | 2.516909  |
| H | 4.165575  | -1.824266 | 1.262453  |
| H | 5.357386  | -1.480429 | 0.012585  |
| H | 4.848402  | 0.900007  | 0.048024  |
| H | 5.078327  | 0.404574  | 1.721982  |
| H | 3.623503  | -0.873454 | -1.592289 |
| H | 0.115490  | 0.741313  | 0.968235  |
| H | 0.584922  | 1.423609  | -1.959169 |
| H | -0.861528 | -0.468638 | -2.482129 |
| H | 1.480886  | -0.826656 | -2.421113 |
| H | 0.764826  | -2.213502 | -1.630878 |
| H | 3.355478  | -3.363284 | -0.329547 |
| H | 3.495747  | 1.533015  | 3.111272  |
| H | 1.764509  | 1.847470  | 2.545072  |
| H | -2.794914 | 1.535573  | -2.206653 |
| H | -2.946087 | 3.175492  | -1.330104 |
| H | 0.353156  | -1.451187 | 1.174632  |
| H | 1.991847  | -1.538476 | 1.822011  |
| H | 1.385279  | -2.786806 | 0.712474  |
| H | -4.211818 | -2.417326 | -0.262475 |
| H | -2.680257 | -2.867257 | 0.513334  |
| H | -2.691943 | -0.702510 | 1.771962  |
| H | -5.523529 | -0.362686 | 0.630488  |
| H | -4.137167 | 0.672368  | 0.255874  |
| H | -4.796019 | 0.642297  | 1.895178  |
| H | -5.175170 | -2.460089 | 2.187175  |
| H | -3.555541 | -2.792137 | 2.826135  |
| H | -4.464617 | -1.384394 | 3.399050  |

B3LYP energy = -1155.17996322 a.u.

(1R,5S,6R,7R,8R,10R)-**3**, Conf. O

|   |           |           |           |
|---|-----------|-----------|-----------|
| C | 4.321136  | -1.412133 | 0.377282  |
| C | 4.511001  | 0.082220  | 0.706734  |
| C | 3.202245  | 0.763515  | 1.046057  |
| C | 2.148700  | 0.549108  | -0.023778 |
| C | 1.842586  | -0.996392 | -0.210236 |
| C | 3.195200  | -1.651046 | -0.635914 |
| C | 0.821713  | 1.277115  | 0.121336  |
| C | -0.034186 | 1.097693  | -1.139583 |
| C | -0.456551 | -0.348453 | -1.340606 |
| C | 0.812073  | -1.225858 | -1.356587 |



|   |           |           |           |
|---|-----------|-----------|-----------|
| O | 0.915319  | 2.722501  | 0.262100  |
| C | -0.225270 | 3.296634  | -0.244461 |
| C | -0.985137 | 2.255220  | -1.019413 |
| O | 3.057744  | -3.041767 | -0.939810 |
| C | 3.027865  | 1.472695  | 2.166898  |
| C | -2.221314 | 2.446797  | -1.482104 |
| O | -0.495981 | 4.460114  | -0.073023 |
| H | 2.595090  | 0.891068  | -0.972977 |
| C | 1.326829  | -1.639193 | 1.097565  |
| O | -1.358976 | -0.724396 | -0.265015 |
| C | -2.383143 | -1.569983 | -0.561869 |
| O | -2.591184 | -2.001996 | -1.677674 |
| C | -3.209882 | -1.880375 | 0.666325  |
| C | -4.092590 | -0.700362 | 1.147128  |
| C | -5.127853 | -0.294008 | 0.088138  |
| C | -4.774491 | -1.070261 | 2.472565  |
| H | 4.101713  | -1.963388 | 1.301828  |
| H | 5.248049  | -1.832268 | -0.028531 |
| H | 4.946217  | 0.580163  | -0.173356 |
| H | 5.230077  | 0.202292  | 1.523225  |
| H | 3.484523  | -1.198163 | -1.593681 |
| H | 0.280928  | 0.915114  | 1.002205  |
| H | 0.625804  | 1.326838  | -1.992469 |
| H | -0.993914 | -0.483724 | -2.282245 |
| H | 1.306340  | -1.027426 | -2.317591 |
| H | 0.524837  | -2.280147 | -1.382975 |
| H | 3.077993  | -3.548035 | -0.116783 |
| H | 3.833556  | 1.574710  | 2.889387  |
| H | 2.104746  | 1.996159  | 2.389716  |
| H | -2.748535 | 1.684765  | -2.048023 |
| H | -2.730271 | 3.388057  | -1.296724 |
| H | 1.213143  | -2.720576 | 0.961575  |
| H | 0.343698  | -1.256483 | 1.374572  |
| H | 2.000175  | -1.464220 | 1.939785  |
| H | -3.838631 | -2.741775 | 0.421715  |
| H | -2.527483 | -2.168080 | 1.474365  |
| H | -3.430500 | 0.155580  | 1.331066  |
| H | -5.813522 | -1.122539 | -0.127469 |
| H | -5.725683 | 0.554050  | 0.439021  |
| H | -4.657736 | -0.002912 | -0.856729 |
| H | -4.040078 | -1.317798 | 3.247215  |
| H | -5.435989 | -1.936405 | 2.346533  |
| H | -5.383514 | -0.238114 | 2.841858  |

B3LYP energy = -1155.17962269 a.u.

(1R,5S,6R,7R,8R,10R)-3, Conf. Q

|   |           |           |           |
|---|-----------|-----------|-----------|
| C | 4.279435  | -1.504719 | 0.371580  |
| C | 4.523856  | -0.012104 | 0.666681  |
| C | 3.246064  | 0.724362  | 1.008039  |
| C | 2.168344  | 0.523604  | -0.040602 |
| C | 1.814911  | -1.016018 | -0.189589 |
| C | 3.141203  | -1.717319 | -0.626863 |
| C | 0.865135  | 1.290186  | 0.117292  |
| C | -0.018868 | 1.118052  | -1.125367 |
| C | -0.489346 | -0.316068 | -1.295974 |
| C | 0.752465  | -1.235302 | -1.309345 |

|   |           |           |           |
|---|-----------|-----------|-----------|
| O | 1.002257  | 2.734624  | 0.233050  |
| C | -0.129226 | 3.334421  | -0.261715 |
| C | -0.934908 | 2.303464  | -1.003960 |
| O | 2.995772  | -3.132926 | -0.781408 |
| C | 3.112523  | 1.463677  | 2.114803  |
| C | -2.177495 | 2.521457  | -1.436284 |
| O | -0.362770 | 4.508101  | -0.105973 |
| H | 2.607098  | 0.838337  | -1.003026 |
| C | 1.310205  | -1.625986 | 1.137511  |
| O | -1.398211 | -0.631523 | -0.209447 |
| C | -2.338153 | -1.588782 | -0.436066 |
| O | -2.442027 | -2.179913 | -1.492400 |
| C | -3.215079 | -1.793881 | 0.778458  |
| C | -4.200139 | -0.626281 | 1.043024  |
| C | -5.197606 | -0.449574 | -0.111381 |
| C | -4.932068 | -0.856520 | 2.373478  |
| H | 4.042628  | -2.041474 | 1.296519  |
| H | 5.185576  | -1.965905 | -0.035214 |
| H | 4.966520  | 0.455123  | -0.226938 |
| H | 5.255892  | 0.098253  | 1.472919  |
| H | 3.438367  | -1.278088 | -1.594442 |
| H | 0.331459  | 0.955896  | 1.013372  |
| H | 0.631692  | 1.315563  | -1.993319 |
| H | -1.036698 | -0.452209 | -2.232490 |
| H | 1.228832  | -1.073269 | -2.287992 |
| H | 0.408157  | -2.274271 | -1.296645 |
| H | 2.492050  | -3.322938 | -1.582772 |
| H | 3.931710  | 1.551495  | 2.823789  |
| H | 2.211676  | 2.023650  | 2.339617  |
| H | -2.741856 | 1.765454  | -1.973620 |
| H | -2.654950 | 3.479361  | -1.252424 |
| H | 1.261060  | -2.714444 | 1.039995  |
| H | 0.312288  | -1.265322 | 1.391825  |
| H | 1.971898  | -1.389939 | 1.973451  |
| H | -3.769101 | -2.724642 | 0.623772  |
| H | -2.565688 | -1.919007 | 1.652472  |
| H | -3.606985 | 0.292710  | 1.134309  |
| H | -4.695513 | -0.263247 | -1.066465 |
| H | -5.814755 | -1.347741 | -0.234933 |
| H | -5.867971 | 0.394099  | 0.084769  |
| H | -4.229141 | -0.939893 | 3.209820  |
| H | -5.527861 | -1.777190 | 2.340659  |
| H | -5.614090 | -0.027290 | 2.590108  |

B3LYP energy = -1155.17958170 a.u.

(1R,5S,6R,7R,8R,10R)-3, Conf. R

|   |           |           |           |
|---|-----------|-----------|-----------|
| C | 4.119841  | -2.074038 | 0.119028  |
| C | 4.629647  | -0.644932 | 0.394541  |
| C | 3.518122  | 0.274486  | 0.855551  |
| C | 2.333747  | 0.268542  | -0.092601 |
| C | 1.728693  | -1.192557 | -0.227245 |
| C | 2.879128  | -2.076626 | -0.782270 |
| C | 1.184343  | 1.222523  | 0.189761  |
| C | 0.181149  | 1.223791  | -0.971570 |
| C | -0.517179 | -0.120248 | -1.123230 |
| C | 0.557329  | -1.216685 | -1.256357 |

|   |           |           |           |
|---|-----------|-----------|-----------|
| O | 1.555232  | 2.624317  | 0.314291  |
| C | 0.490217  | 3.404450  | -0.066983 |
| C | -0.527208 | 2.530784  | -0.746931 |
| O | 2.366667  | -3.401545 | -0.967754 |
| C | 3.605669  | 1.002643  | 1.974366  |
| C | -1.757713 | 2.944061  | -1.057286 |
| O | 0.458615  | 4.595196  | 0.127590  |
| H | 2.730280  | 0.535071  | -1.086996 |
| C | 1.246026  | -1.745271 | 1.134352  |
| O | -1.363225 | -0.376003 | 0.030842  |
| C | -2.709760 | -0.439827 | -0.152010 |
| O | -3.246025 | -0.289731 | -1.231535 |
| C | -3.400891 | -0.696571 | 1.173598  |
| C | -4.877902 | -1.137894 | 1.114854  |
| C | -5.814182 | -0.038724 | 0.586632  |
| C | -5.060352 | -2.460251 | 0.352274  |
| H | 3.877374  | -2.578332 | 1.060571  |
| H | 4.913645  | -2.662608 | -0.361086 |
| H | 5.057519  | -0.238034 | -0.534818 |
| H | 5.439618  | -0.666704 | 1.130265  |
| H | 3.160218  | -1.663956 | -1.766783 |
| H | 0.683005  | 0.950039  | 1.124842  |
| H | 0.777268  | 1.346789  | -1.891219 |
| H | -1.159492 | -0.130590 | -2.006447 |
| H | 0.976484  | -1.107751 | -2.266215 |
| H | 0.078285  | -2.198935 | -1.231430 |
| H | 3.077351  | -3.968831 | -1.293249 |
| H | 4.489540  | 0.946386  | 2.604683  |
| H | 2.829240  | 1.692758  | 2.285067  |
| H | -2.475411 | 2.293503  | -1.547724 |
| H | -2.063575 | 3.957201  | -0.812684 |
| H | 0.342606  | -1.237576 | 1.473808  |
| H | 2.004620  | -1.635739 | 1.912660  |
| H | 1.011817  | -2.808038 | 1.029862  |
| H | -2.802097 | -1.438552 | 1.714368  |
| H | -3.309893 | 0.233647  | 1.751853  |
| H | -5.153778 | -1.324242 | 2.162784  |
| H | -6.859828 | -0.352927 | 0.678715  |
| H | -5.696407 | 0.890658  | 1.156721  |
| H | -5.614124 | 0.178749  | -0.465728 |
| H | -4.828043 | -2.339156 | -0.710145 |
| H | -6.095610 | -2.809393 | 0.432333  |
| H | -4.413071 | -3.247247 | 0.757680  |

B3LYP energy = -1155.17950465 a.u.

(1R,5S,6R,7R,8R,10R)-**3**, Conf. S

|   |           |           |           |
|---|-----------|-----------|-----------|
| C | 3.826909  | -2.361561 | 0.003625  |
| C | 4.478511  | -0.998843 | 0.314910  |
| C | 3.469168  | 0.009794  | 0.822650  |
| C | 2.278835  | 0.152331  | -0.107670 |
| C | 1.530990  | -1.235569 | -0.277213 |
| C | 2.579869  | -2.212371 | -0.876464 |
| C | 1.232274  | 1.205261  | 0.220425  |
| C | 0.224594  | 1.347489  | -0.928242 |
| C | -0.606020 | 0.083564  | -1.113644 |
| C | 0.351814  | -1.111115 | -1.290002 |

|   |           |           |           |
|---|-----------|-----------|-----------|
| O | 1.745195  | 2.555715  | 0.390409  |
| C | 0.763582  | 3.453348  | 0.046582  |
| C | -0.342401 | 2.714104  | -0.654071 |
| O | 1.935101  | -3.473134 | -1.093843 |
| C | 3.639607  | 0.685572  | 1.964327  |
| C | -1.518837 | 3.274624  | -0.943488 |
| O | 0.855572  | 4.633337  | 0.283428  |
| H | 2.687985  | 0.410688  | -1.099149 |
| C | 1.012431  | -1.780407 | 1.074124  |
| O | -1.464634 | -0.131235 | 0.040459  |
| C | -2.803712 | 0.049203  | -0.108664 |
| O | -3.321976 | 0.381686  | -1.157317 |
| C | -3.540837 | -0.203803 | 1.190570  |
| C | -4.678010 | -1.255575 | 1.099610  |
| C | -5.887047 | -0.769803 | 0.285809  |
| C | -4.160334 | -2.610500 | 0.592492  |
| H | 3.548615  | -2.869632 | 0.933262  |
| H | 4.552158  | -3.009269 | -0.507760 |
| H | 4.932519  | -0.605782 | -0.607932 |
| H | 5.291986  | -1.124412 | 1.036509  |
| H | 2.888123  | -1.798465 | -1.852254 |
| H | 0.712638  | 0.950139  | 1.150477  |
| H | 0.820899  | 1.439019  | -1.851381 |
| H | -1.252662 | 0.167239  | -1.989751 |
| H | 0.768905  | -1.015664 | -2.302113 |
| H | -0.223891 | -2.040291 | -1.286138 |
| H | 2.581713  | -4.098192 | -1.446019 |
| H | 4.519965  | 0.520217  | 2.580155  |
| H | 2.937488  | 1.436621  | 2.308401  |
| H | -2.309381 | 2.729466  | -1.449464 |
| H | -1.702231 | 4.307156  | -0.660106 |
| H | 0.169916  | -1.195459 | 1.444789  |
| H | 1.789603  | -1.772448 | 1.841596  |
| H | 0.669557  | -2.809919 | 0.941379  |
| H | -2.814894 | -0.505481 | 1.950178  |
| H | -3.965697 | 0.758805  | 1.502120  |
| H | -5.012347 | -1.395607 | 2.137176  |
| H | -6.695033 | -1.508748 | 0.330415  |
| H | -6.276514 | 0.175940  | 0.679992  |
| H | -5.623351 | -0.609466 | -0.763080 |
| H | -3.314180 | -2.968399 | 1.189879  |
| H | -3.834444 | -2.545508 | -0.452490 |
| H | -4.949821 | -3.367941 | 0.642227  |

B3LYP energy = -1155.17927986 a.u.

(1R,5S,6R,7R,8S,10R)-**3**, Conf. A

|   |           |           |           |
|---|-----------|-----------|-----------|
| C | 3.998905  | -2.425444 | -0.262970 |
| C | 4.665500  | -1.072247 | -0.581072 |
| C | 3.915012  | 0.086320  | 0.041002  |
| C | 2.441940  | 0.084853  | -0.324720 |
| C | 1.745885  | -1.259309 | 0.147804  |
| C | 2.497536  | -2.408840 | -0.575955 |
| C | 1.588412  | 1.241077  | 0.168129  |
| C | 0.167527  | 1.188712  | -0.417894 |
| C | -0.555711 | -0.040486 | 0.101425  |

|   |           |           |           |
|---|-----------|-----------|-----------|
| C | 0.254491  | -1.287473 | -0.296417 |
| O | 2.058360  | 2.564813  | -0.204369 |
| C | 0.983575  | 3.421027  | -0.233198 |
| C | -0.278744 | 2.605002  | -0.172910 |
| O | 1.870613  | -3.643842 | -0.213357 |
| C | 4.514098  | 0.993007  | 0.821255  |
| C | -1.477871 | 3.146188  | 0.050469  |
| O | 1.111328  | 4.618037  | -0.314424 |
| H | 2.389889  | 0.094495  | -1.426023 |
| C | 1.826444  | -1.449779 | 1.680892  |
| O | -1.862071 | -0.096393 | -0.534256 |
| C | -2.861792 | -0.722692 | 0.141019  |
| O | -2.730584 | -1.179422 | 1.258200  |
| C | -4.122654 | -0.796640 | -0.696345 |
| C | -5.419697 | -0.881384 | 0.127267  |
| C | -5.687893 | 0.424599  | 0.890868  |
| C | -6.602778 | -1.244141 | -0.782212 |
| H | 4.140756  | -2.680353 | 0.792975  |
| H | 4.479060  | -3.220756 | -0.849335 |
| H | 4.681094  | -0.934593 | -1.673337 |
| H | 5.708515  | -1.075667 | -0.249414 |
| H | 2.367230  | -2.247539 | -1.659930 |
| H | 1.541379  | 1.228983  | 1.264389  |
| H | 0.275983  | 1.070341  | -1.508550 |
| H | -0.714333 | 0.011200  | 1.181418  |
| H | 0.202781  | -1.370740 | -1.390456 |
| H | -0.220832 | -2.180689 | 0.115905  |
| H | 2.343110  | -4.371233 | -0.638076 |
| H | 5.575622  | 0.918241  | 1.042969  |
| H | 3.989213  | 1.845769  | 1.236680  |
| H | -2.380766 | 2.546779  | 0.082175  |
| H | -1.565135 | 4.217902  | 0.203348  |
| H | 1.148105  | -0.777328 | 2.212635  |
| H | 2.831947  | -1.265268 | 2.065687  |
| H | 1.538280  | -2.472648 | 1.935251  |
| H | -4.144032 | 0.053013  | -1.388441 |
| H | -4.016192 | -1.695369 | -1.320649 |
| H | -5.286765 | -1.683867 | 0.863191  |
| H | -6.601446 | 0.344109  | 1.489843  |
| H | -4.867150 | 0.666767  | 1.573505  |
| H | -5.820059 | 1.264850  | 0.196755  |
| H | -7.527480 | -1.331537 | -0.201722 |
| H | -6.438384 | -2.198860 | -1.294907 |
| H | -6.764662 | -0.475634 | -1.548848 |

B3LYP energy = -1155.18326127 a.u.

(1R,5S,6R,7R,8S,10R)-**3**, Conf. B

|   |           |           |           |
|---|-----------|-----------|-----------|
| C | 3.440490  | -2.902526 | -0.353048 |
| C | 4.323653  | -1.697977 | -0.734002 |
| C | 3.841472  | -0.417645 | -0.085346 |
| C | 2.373324  | -0.147518 | -0.359760 |
| C | 1.471597  | -1.337087 | 0.175553  |
| C | 1.951365  | -2.609862 | -0.573319 |
| C | 1.780229  | 1.149087  | 0.165071  |
| C | 0.340275  | 1.358266  | -0.332737 |
| C | -0.566166 | 0.285784  | 0.243956  |

|   |           |           |           |
|---|-----------|-----------|-----------|
| C | -0.023259 | -1.090877 | -0.179251 |
| O | 2.461631  | 2.361503  | -0.256880 |
| C | 1.563866  | 3.401630  | -0.231864 |
| C | 0.179018  | 2.833461  | -0.081888 |
| O | 1.131718  | -3.705269 | -0.151732 |
| C | 4.646718  | 0.366873  | 0.639796  |
| C | -0.883416 | 3.587673  | 0.206114  |
| O | 1.904735  | 4.554149  | -0.338086 |
| H | 2.254450  | -0.133978 | -1.455821 |
| C | 1.610861  | -1.533228 | 1.703789  |
| O | -1.892652 | 0.469387  | -0.322808 |
| C | -2.954348 | 0.043776  | 0.411114  |
| O | -2.847642 | -0.467644 | 1.506981  |
| C | -4.260720 | 0.338598  | -0.299017 |
| C | -5.414504 | -0.601889 | 0.091935  |
| C | -6.744107 | -0.063169 | -0.456302 |
| C | -5.157074 | -2.037788 | -0.390179 |
| H | 3.600230  | -3.173272 | 0.696248  |
| H | 3.727568  | -3.776120 | -0.954109 |
| H | 4.294380  | -1.570564 | -1.827257 |
| H | 5.367273  | -1.892949 | -0.467997 |
| H | 1.784057  | -2.432897 | -1.649860 |
| H | 1.801520  | 1.152104  | 1.262100  |
| H | 0.357291  | 1.218963  | -1.426143 |
| H | -0.653410 | 0.369810  | 1.330110  |
| H | -0.154233 | -1.168208 | -1.267057 |
| H | -0.629976 | -1.878386 | 0.273411  |
| H | 1.427022  | -4.508039 | -0.600129 |
| H | 5.688232  | 0.097863  | 0.796261  |
| H | 4.316284  | 1.304966  | 1.071472  |
| H | -1.877495 | 3.165037  | 0.299794  |
| H | -0.762567 | 4.657491  | 0.349049  |
| H | 1.116809  | -0.736783 | 2.266885  |
| H | 2.655488  | -1.553055 | 2.022880  |
| H | 1.141689  | -2.477057 | 1.992037  |
| H | -4.521208 | 1.375303  | -0.041009 |
| H | -4.088189 | 0.327770  | -1.381270 |
| H | -5.468314 | -0.615171 | 1.187429  |
| H | -6.730758 | -0.016842 | -1.552717 |
| H | -7.577483 | -0.710529 | -0.163028 |
| H | -6.955662 | 0.944759  | -0.081071 |
| H | -5.084432 | -2.076567 | -1.484813 |
| H | -5.975168 | -2.700891 | -0.088579 |
| H | -4.231350 | -2.443266 | 0.029691  |

B3LYP energy = -1155.18311149 a.u.

(1R,5S,6R,7R,8S,10R)-**3**, Conf. C

|   |           |           |           |
|---|-----------|-----------|-----------|
| C | 3.984642  | -2.440337 | -0.291403 |
| C | 4.657397  | -1.082558 | -0.576375 |
| C | 3.909837  | 0.069686  | 0.060133  |
| C | 2.440024  | 0.080863  | -0.316633 |
| C | 1.733025  | -1.261424 | 0.142529  |
| C | 2.480798  | -2.418383 | -0.591151 |
| C | 1.591846  | 1.244004  | 0.169984  |
| C | 0.172148  | 1.200330  | -0.419729 |
| C | -0.558412 | -0.025722 | 0.097421  |

|   |           |           |           |
|---|-----------|-----------|-----------|
| C | 0.244805  | -1.274428 | -0.308532 |
| O | 2.072003  | 2.563656  | -0.202789 |
| C | 1.002614  | 3.427233  | -0.233729 |
| C | -0.265310 | 2.619516  | -0.175565 |
| O | 1.882682  | -3.695137 | -0.355697 |
| C | 4.506943  | 0.961805  | 0.858513  |
| C | -1.461536 | 3.168311  | 0.044839  |
| O | 1.138475  | 4.623219  | -0.314467 |
| H | 2.396630  | 0.092201  | -1.418365 |
| C | 1.804811  | -1.457909 | 1.674058  |
| O | -1.867234 | -0.070388 | -0.533098 |
| C | -2.858961 | -0.720618 | 0.131275  |
| O | -2.716444 | -1.205935 | 1.235237  |
| C | -4.124826 | -0.780956 | -0.699075 |
| C | -5.416457 | -0.881328 | 0.131445  |
| C | -5.680051 | 0.410748  | 0.919920  |
| C | -6.605291 | -1.228496 | -0.776553 |
| H | 4.143552  | -2.712716 | 0.761073  |
| H | 4.447611  | -3.228234 | -0.895680 |
| H | 4.679423  | -0.926540 | -1.665854 |
| H | 5.698782  | -1.097139 | -0.239749 |
| H | 2.342120  | -2.256711 | -1.668415 |
| H | 1.540296  | 1.236012  | 1.266153  |
| H | 0.282344  | 1.081668  | -1.510134 |
| H | -0.712984 | 0.022958  | 1.178390  |
| H | 0.199208  | -1.345851 | -1.403506 |
| H | -0.240337 | -2.169603 | 0.088119  |
| H | 2.185846  | -4.036219 | 0.496364  |
| H | 5.566412  | 0.879406  | 1.087191  |
| H | 3.982740  | 1.811327  | 1.281661  |
| H | -2.368089 | 2.574302  | 0.074053  |
| H | -1.542477 | 4.240613  | 0.197088  |
| H | 2.823021  | -1.362681 | 2.057526  |
| H | 1.417801  | -2.446394 | 1.943257  |
| H | 1.189344  | -0.733419 | 2.213221  |
| H | -4.151420 | 0.080658  | -1.375924 |
| H | -4.021552 | -1.668712 | -1.339384 |
| H | -5.278330 | -1.696839 | 0.851933  |
| H | -4.854570 | 0.641908  | 1.600752  |
| H | -5.817835 | 1.262944  | 0.241665  |
| H | -6.589174 | 0.318927  | 1.523950  |
| H | -6.444037 | -2.174109 | -1.306735 |
| H | -6.772292 | -0.446914 | -1.528711 |
| H | -7.526168 | -1.326174 | -0.191657 |

B3LYP energy = -1155.18281616 a.u.

(1R,5S,6R,7R,8S,10R)-3, Conf. D

|   |           |           |           |
|---|-----------|-----------|-----------|
| C | 3.976489  | -2.447964 | -0.269531 |
| C | 4.651870  | -1.097135 | -0.573171 |
| C | 3.910380  | 0.067358  | 0.047741  |
| C | 2.438325  | 0.078919  | -0.321988 |
| C | 1.734329  | -1.260512 | 0.149872  |
| C | 2.479806  | -2.421860 | -0.581321 |
| C | 1.594274  | 1.242135  | 0.170595  |
| C | 0.173653  | 1.202971  | -0.417241 |
| C | -0.561950 | -0.017815 | 0.102107  |

|   |           |           |           |
|---|-----------|-----------|-----------|
| C | 0.240829  | -1.272785 | -0.289377 |
| O | 2.074531  | 2.562740  | -0.199538 |
| C | 1.007330  | 3.427874  | -0.228255 |
| C | -0.262104 | 2.622327  | -0.171554 |
| O | 1.968789  | -3.713352 | -0.238022 |
| C | 4.512916  | 0.969276  | 0.830906  |
| C | -1.457508 | 3.172382  | 0.049777  |
| O | 1.143999  | 4.623882  | -0.307047 |
| H | 2.389056  | 0.089457  | -1.423785 |
| C | 1.817118  | -1.457673 | 1.680592  |
| O | -1.868241 | -0.057529 | -0.534789 |
| C | -2.855688 | -0.737773 | 0.106055  |
| O | -2.702085 | -1.276897 | 1.183131  |
| C | -4.130374 | -0.755024 | -0.712925 |
| C | -5.413695 | -0.876146 | 0.128354  |
| C | -5.651500 | 0.383563  | 0.975207  |
| C | -6.617154 | -1.168993 | -0.779445 |
| H | 4.114130  | -2.714225 | 0.784235  |
| H | 4.438232  | -3.246875 | -0.859179 |
| H | 4.676736  | -0.953174 | -1.664653 |
| H | 5.692723  | -1.110556 | -0.235058 |
| H | 2.351912  | -2.259423 | -1.664993 |
| H | 1.545909  | 1.228300  | 1.266904  |
| H | 0.281898  | 1.083592  | -1.507780 |
| H | -0.720283 | 0.034669  | 1.182246  |
| H | 0.181441  | -1.359165 | -1.383993 |
| H | -0.256068 | -2.147578 | 0.142408  |
| H | 1.105509  | -3.841931 | -0.650571 |
| H | 5.572883  | 0.885617  | 1.056644  |
| H | 3.993668  | 1.826036  | 1.245289  |
| H | -2.365184 | 2.580017  | 0.077802  |
| H | -1.536522 | 4.244501  | 0.204208  |
| H | 1.127005  | -0.802420 | 2.219208  |
| H | 2.820041  | -1.259099 | 2.064372  |
| H | 1.551445  | -2.488951 | 1.928232  |
| H | -4.156721 | 0.133070  | -1.354472 |
| H | -4.043972 | -1.617913 | -1.388802 |
| H | -5.277607 | -1.723878 | 0.811008  |
| H | -4.815853 | 0.574509  | 1.656067  |
| H | -5.785508 | 1.266200  | 0.336307  |
| H | -6.555062 | 0.276746  | 1.584912  |
| H | -7.532147 | -1.280842 | -0.188004 |
| H | -6.474371 | -2.092672 | -1.351967 |
| H | -6.783319 | -0.353513 | -1.494848 |

B3LYP energy = -1155.18265837 a.u.

(1R,5S,6R,7R,8S,10R)-3, Conf. E

|   |           |           |           |
|---|-----------|-----------|-----------|
| C | 3.432237  | -2.908050 | -0.383052 |
| C | 4.321470  | -1.696799 | -0.727899 |
| C | 3.836703  | -0.425472 | -0.064284 |
| C | 2.373024  | -0.148077 | -0.352297 |
| C | 1.463266  | -1.337045 | 0.168648  |
| C | 1.941572  | -2.614539 | -0.590178 |
| C | 1.781464  | 1.152305  | 0.165672  |
| C | 0.343296  | 1.364930  | -0.335933 |
| C | -0.565737 | 0.293687  | 0.239780  |

|   |           |           |           |
|---|-----------|-----------|-----------|
| C | -0.026721 | -1.080976 | -0.193889 |
| O | 2.468249  | 2.360871  | -0.257401 |
| C | 1.573659  | 3.404363  | -0.234926 |
| C | 0.186459  | 2.840947  | -0.087019 |
| O | 1.139280  | -3.760216 | -0.294592 |
| C | 4.634469  | 0.346070  | 0.682671  |
| C | -0.874347 | 3.599206  | 0.196404  |
| O | 1.918608  | 4.555483  | -0.341312 |
| H | 2.264252  | -0.134033 | -1.449493 |
| C | 1.592308  | -1.537498 | 1.696004  |
| O | -1.894517 | 0.485179  | -0.317451 |
| C | -2.950291 | 0.038311  | 0.412641  |
| O | -2.833578 | -0.498160 | 1.495680  |
| C | -4.262033 | 0.344561  | -0.281969 |
| C | -5.412339 | -0.604091 | 0.099380  |
| C | -6.746275 | -0.054867 | -0.427569 |
| C | -5.158384 | -2.029983 | -0.413262 |
| H | 3.604516  | -3.200363 | 0.661911  |
| H | 3.706185  | -3.769400 | -1.002224 |
| H | 4.304258  | -1.551132 | -1.818905 |
| H | 5.361742  | -1.899732 | -0.454572 |
| H | 1.765188  | -2.436522 | -1.659470 |
| H | 1.798788  | 1.160673  | 1.262852  |
| H | 0.362307  | 1.224704  | -1.429145 |
| H | -0.646547 | 0.372397  | 1.327008  |
| H | -0.148987 | -1.146318 | -1.283331 |
| H | -0.641271 | -1.872027 | 0.242099  |
| H | 1.438833  | -4.150826 | 0.537187  |
| H | 5.673366  | 0.072513  | 0.848266  |
| H | 4.301226  | 1.279360  | 1.122832  |
| H | -1.870099 | 3.179893  | 0.287186  |
| H | -0.750346 | 4.668893  | 0.337602  |
| H | 1.173345  | -0.701157 | 2.261421  |
| H | 2.631303  | -1.649771 | 2.014351  |
| H | 1.032006  | -2.425974 | 2.005779  |
| H | -4.521338 | 1.376139  | -0.002909 |
| H | -4.097045 | 0.354164  | -1.365401 |
| H | -5.457672 | -0.638980 | 1.194815  |
| H | -6.741538 | 0.013155  | -1.522887 |
| H | -7.577197 | -0.708192 | -0.140700 |
| H | -6.955068 | 0.945346  | -0.030717 |
| H | -4.229213 | -2.443517 | -0.009192 |
| H | -5.094232 | -2.047199 | -1.508895 |
| H | -5.973887 | -2.699242 | -0.118400 |

B3LYP energy = -1155.18262340 a.u.

(1R,5S,6R,7R,8S,10R)-**3**, Conf. F

|   |           |           |           |
|---|-----------|-----------|-----------|
| C | 3.416672  | -2.920779 | -0.360953 |
| C | 4.304952  | -1.720384 | -0.738390 |
| C | 3.835762  | -0.433910 | -0.093063 |
| C | 2.368241  | -0.154046 | -0.361148 |
| C | 1.465570  | -1.337070 | 0.185063  |
| C | 1.932189  | -2.621947 | -0.570480 |
| C | 1.787903  | 1.148508  | 0.163074  |
| C | 0.346246  | 1.366810  | -0.326214 |
| C | -0.564176 | 0.305645  | 0.262805  |

|   |           |           |           |
|---|-----------|-----------|-----------|
| C | -0.031245 | -1.078038 | -0.153658 |
| O | 2.473865  | 2.355645  | -0.266290 |
| C | 1.583777  | 3.401888  | -0.238598 |
| C | 0.195632  | 2.843771  | -0.079870 |
| O | 1.218506  | -3.793780 | -0.165295 |
| C | 4.648692  | 0.349487  | 0.624779  |
| C | -0.860799 | 3.605827  | 0.209420  |
| O | 1.930825  | 4.551938  | -0.349446 |
| H | 2.243497  | -0.143909 | -1.456952 |
| C | 1.618419  | -1.534758 | 1.710482  |
| O | -1.893350 | 0.500078  | -0.293489 |
| C | -2.947614 | 0.024906  | 0.421369  |
| O | -2.826087 | -0.558256 | 1.479327  |
| C | -4.261538 | 0.362361  | -0.253956 |
| C | -5.410831 | -0.602835 | 0.086988  |
| C | -6.746535 | -0.029509 | -0.408830 |
| C | -5.159222 | -2.003394 | -0.492273 |
| H | 3.577840  | -3.198390 | 0.686421  |
| H | 3.681328  | -3.796255 | -0.963182 |
| H | 4.278347  | -1.592520 | -1.831859 |
| H | 5.347128  | -1.922533 | -0.472119 |
| H | 1.759092  | -2.447690 | -1.646139 |
| H | 1.816126  | 1.153559  | 1.260090  |
| H | 0.354352  | 1.222332  | -1.419034 |
| H | -0.640830 | 0.394148  | 1.349532  |
| H | -0.178689 | -1.161018 | -1.240097 |
| H | -0.649970 | -1.842746 | 0.326384  |
| H | 0.320807  | -3.766276 | -0.519300 |
| H | 5.688896  | 0.073948  | 0.778272  |
| H | 4.326800  | 1.291914  | 1.053521  |
| H | -1.857454 | 3.190303  | 0.307722  |
| H | -0.732064 | 4.675296  | 0.347945  |
| H | 2.665604  | -1.531831 | 2.020843  |
| H | 1.177488  | -2.493359 | 1.997157  |
| H | 1.108762  | -0.754371 | 2.282636  |
| H | -4.519696 | 1.379647  | 0.074082  |
| H | -4.100636 | 0.423146  | -1.336358 |
| H | -5.452144 | -0.688941 | 1.179690  |
| H | -6.745930 | 0.090389  | -1.499682 |
| H | -7.576540 | -0.695474 | -0.149898 |
| H | -6.953605 | 0.950756  | 0.035655  |
| H | -5.974694 | -2.685244 | -0.228164 |
| H | -4.230315 | -2.435804 | -0.107243 |
| H | -5.096152 | -1.969277 | -1.587664 |

B3LYP energy = -1155.18256710 a.u.

(1R,5S,6R,7R,8S,10R)-**3**, Conf. G

|   |           |           |           |
|---|-----------|-----------|-----------|
| C | 3.258038  | -2.928135 | -0.430844 |
| C | 4.107763  | -1.748740 | -0.944568 |
| C | 3.709241  | -0.440527 | -0.294353 |
| C | 2.222767  | -0.161428 | -0.419141 |
| C | 1.374162  | -1.319246 | 0.253835  |
| C | 1.756768  | -2.622253 | -0.498725 |
| C | 1.701848  | 1.161098  | 0.117497  |
| C | 0.218622  | 1.370470  | -0.231269 |
| C | -0.628284 | 0.333260  | 0.483798  |

|   |           |           |           |
|---|-----------|-----------|-----------|
| C | -0.148728 | -1.065525 | 0.056729  |
| O | 2.345288  | 2.347997  | -0.420535 |
| C | 1.464165  | 3.399860  | -0.342479 |
| C | 0.098397  | 2.856020  | -0.022792 |
| O | 0.976215  | -3.692112 | 0.045127  |
| C | 4.594027  | 0.357696  | 0.313695  |
| C | -0.919268 | 3.634269  | 0.350407  |
| O | 1.801736  | 4.542709  | -0.531416 |
| H | 1.986074  | -0.185717 | -1.495712 |
| C | 1.678057  | -1.465736 | 1.763563  |
| O | -2.008521 | 0.514076  | 0.066838  |
| C | -2.983797 | 0.134220  | 0.936600  |
| O | -2.755496 | -0.311372 | 2.042813  |
| C | -4.358407 | 0.341078  | 0.339684  |
| C | -4.697171 | -0.647298 | -0.805212 |
| C | -4.691900 | -2.105024 | -0.321567 |
| C | -6.051001 | -0.275555 | -1.427596 |
| H | 3.527691  | -3.168289 | 0.603390  |
| H | 3.469358  | -3.824155 | -1.030406 |
| H | 3.964515  | -1.658178 | -2.032470 |
| H | 5.171596  | -1.948760 | -0.782949 |
| H | 1.475980  | -2.478627 | -1.556432 |
| H | 1.840406  | 1.203654  | 1.205170  |
| H | 0.117049  | 1.188791  | -1.313862 |
| H | -0.590316 | 0.460384  | 1.568630  |
| H | -0.400723 | -1.181686 | -1.006048 |
| H | -0.708113 | -1.827729 | 0.604177  |
| H | 1.224150  | -4.515404 | -0.394726 |
| H | 5.643931  | 0.081424  | 0.367668  |
| H | 4.319432  | 1.313506  | 0.745434  |
| H | -1.900287 | 3.228387  | 0.570418  |
| H | -0.773734 | 4.706995  | 0.437637  |
| H | 2.751032  | -1.478561 | 1.968335  |
| H | 1.242878  | -2.397855 | 2.132234  |
| H | 1.246348  | -0.650016 | 2.349237  |
| H | -5.082362 | 0.235913  | 1.153219  |
| H | -4.416232 | 1.365601  | -0.045970 |
| H | -3.923950 | -0.534314 | -1.576328 |
| H | -4.919119 | -2.785908 | -1.149094 |
| H | -3.722874 | -2.398205 | 0.095026  |
| H | -5.447132 | -2.261095 | 0.458354  |
| H | -6.047736 | 0.749383  | -1.815143 |
| H | -6.858083 | -0.353449 | -0.688496 |
| H | -6.295348 | -0.947492 | -2.257484 |

B3LYP energy = -1155.18220855 a.u.

(1R,5S,6R,7R,8S,10R)-**3**, Conf. H

|   |           |           |           |
|---|-----------|-----------|-----------|
| C | 4.272346  | -1.926731 | -0.418294 |
| C | 4.687012  | -0.487535 | -0.782226 |
| C | 3.806216  | 0.538896  | -0.102204 |
| C | 2.331146  | 0.297818  | -0.366233 |
| C | 1.892458  | -1.134667 | 0.150445  |
| C | 2.769598  | -2.157450 | -0.621758 |
| C | 1.338958  | 1.307328  | 0.184798  |
| C | -0.092764 | 1.025768  | -0.303151 |
| C | -0.577677 | -0.302580 | 0.249736  |

|   |           |           |           |
|---|-----------|-----------|-----------|
| C | 0.400274  | -1.404596 | -0.198948 |
| O | 1.567024  | 2.684879  | -0.218215 |
| C | 0.371552  | 3.360155  | -0.169683 |
| C | -0.738056 | 2.355474  | -0.017759 |
| O | 2.379640  | -3.472262 | -0.211537 |
| C | 4.304995  | 1.532725  | 0.641367  |
| C | -1.984566 | 2.703622  | 0.306791  |
| O | 0.301643  | 4.561375  | -0.259272 |
| H | 2.204384  | 0.288042  | -1.461437 |
| C | 2.100747  | -1.295351 | 1.674578  |
| O | -1.888973 | -0.570269 | -0.318165 |
| C | -2.716707 | -1.398337 | 0.374912  |
| O | -2.430521 | -1.877389 | 1.453412  |
| C | -4.016153 | -1.622381 | -0.368106 |
| C | -4.932523 | -0.375078 | -0.430554 |
| C | -6.151962 | -0.668258 | -1.317137 |
| C | -5.367099 | 0.084153  | 0.969451  |
| H | 4.529486  | -2.142565 | 0.624495  |
| H | 4.831929  | -2.640821 | -1.037879 |
| H | 4.599965  | -0.359187 | -1.872295 |
| H | 5.738392  | -0.319951 | -0.528392 |
| H | 2.538285  | -2.035316 | -1.694141 |
| H | 1.369132  | 1.299762  | 1.281584  |
| H | -0.040436 | 0.923247  | -1.399499 |
| H | -0.684682 | -0.274682 | 1.337155  |
| H | 0.296711  | -1.500474 | -1.288367 |
| H | 0.099837  | -2.359472 | 0.237918  |
| H | 2.926639  | -4.119749 | -0.674395 |
| H | 5.377635  | 1.629646  | 0.788370  |
| H | 3.680905  | 2.291895  | 1.099270  |
| H | -2.776644 | 1.970836  | 0.409208  |
| H | -2.225182 | 3.749384  | 0.474449  |
| H | 3.093509  | -0.967766 | 1.991596  |
| H | 1.977167  | -2.345845 | 1.948782  |
| H | 1.371777  | -0.719247 | 2.250639  |
| H | -3.773395 | -1.938834 | -1.389169 |
| H | -4.535067 | -2.444549 | 0.133760  |
| H | -4.358248 | 0.433199  | -0.902272 |
| H | -6.798180 | 0.212918  | -1.393660 |
| H | -5.852016 | -0.953653 | -2.331627 |
| H | -6.752861 | -1.486118 | -0.900606 |
| H | -4.512433 | 0.316286  | 1.613800  |
| H | -5.951130 | -0.696539 | 1.471630  |
| H | -5.992753 | 0.981026  | 0.905157  |

B3LYP energy = -1155.18193308 a.u.

(1R,5S,6R,7R,8S,10R)-**3**, Conf. I

|   |           |           |           |
|---|-----------|-----------|-----------|
| C | 3.252135  | -2.929074 | -0.462177 |
| C | 4.103959  | -1.740971 | -0.952456 |
| C | 3.705783  | -0.440070 | -0.288212 |
| C | 2.220507  | -0.158590 | -0.416478 |
| C | 1.370114  | -1.317195 | 0.251375  |
| C | 1.749747  | -2.626410 | -0.508806 |
| C | 1.700255  | 1.166163  | 0.116117  |
| C | 0.216098  | 1.375669  | -0.228609 |
| C | -0.628316 | 0.337528  | 0.488580  |

|   |           |           |           |
|---|-----------|-----------|-----------|
| C | -0.150507 | -1.059102 | 0.053027  |
| O | 2.342984  | 2.351343  | -0.425701 |
| C | 1.462749  | 3.404244  | -0.343990 |
| C | 0.097678  | 2.861269  | -0.019206 |
| O | 0.977093  | -3.751401 | -0.083569 |
| C | 4.588296  | 0.350992  | 0.332447  |
| C | -0.918175 | 3.639758  | 0.358410  |
| O | 1.800618  | 4.546769  | -0.533340 |
| H | 1.985873  | -0.184657 | -1.493538 |
| C | 1.673543  | -1.461816 | 1.760299  |
| O | -2.010652 | 0.521771  | 0.081833  |
| C | -2.978989 | 0.112706  | 0.946173  |
| O | -2.740485 | -0.360229 | 2.039084  |
| C | -4.357923 | 0.325526  | 0.362143  |
| C | -4.695675 | -0.634851 | -0.806719 |
| C | -4.681389 | -2.104470 | -0.360901 |
| C | -6.053473 | -0.253783 | -1.414676 |
| H | 3.541364  | -3.185370 | 0.566290  |
| H | 3.447218  | -3.815329 | -1.076039 |
| H | 3.963422  | -1.636816 | -2.039282 |
| H | 5.167248  | -1.944499 | -0.791254 |
| H | 1.454675  | -2.484884 | -1.557159 |
| H | 1.840576  | 1.213183  | 1.203426  |
| H | 0.111249  | 1.194325  | -1.310893 |
| H | -0.583380 | 0.461225  | 1.573747  |
| H | -0.398636 | -1.166715 | -1.011395 |
| H | -0.715189 | -1.825341 | 0.589582  |
| H | 1.363443  | -4.116132 | 0.723843  |
| H | 5.637868  | 0.073845  | 0.388215  |
| H | 4.312504  | 1.303049  | 0.771885  |
| H | -1.898543 | 3.233933  | 0.581452  |
| H | -0.771896 | 4.712377  | 0.445685  |
| H | 1.307287  | -0.610609 | 2.339560  |
| H | 2.743353  | -1.551468 | 1.962264  |
| H | 1.165183  | -2.344865 | 2.161645  |
| H | -5.076938 | 0.194298  | 1.176280  |
| H | -4.424260 | 1.359449  | 0.003887  |
| H | -3.925879 | -0.498158 | -1.577383 |
| H | -5.432876 | -2.284299 | 0.417560  |
| H | -4.908049 | -2.764957 | -1.204800 |
| H | -3.709167 | -2.403666 | 0.043741  |
| H | -6.056556 | 0.780967  | -1.775243 |
| H | -6.857799 | -0.355140 | -0.675417 |
| H | -6.297059 | -0.904910 | -2.261163 |

B3LYP energy = -1155.18175922 a.u.

(1R,5S,6R,7R,8S,10R)-3, Conf. J

|   |           |           |           |
|---|-----------|-----------|-----------|
| C | 3.251187  | -2.933751 | -0.452412 |
| C | 4.099908  | -1.751372 | -0.957305 |
| C | 3.708149  | -0.443166 | -0.303885 |
| C | 2.221606  | -0.160921 | -0.420588 |
| C | 1.379007  | -1.319277 | 0.257797  |
| C | 1.754002  | -2.628895 | -0.506204 |
| C | 1.707281  | 1.162521  | 0.120065  |
| C | 0.222637  | 1.375901  | -0.219977 |
| C | -0.622695 | 0.343261  | 0.501708  |

|   |           |           |           |
|---|-----------|-----------|-----------|
| C | -0.145188 | -1.058617 | 0.078434  |
| O | 2.349076  | 2.349241  | -0.420178 |
| C | 1.471001  | 3.402744  | -0.335727 |
| C | 0.105470  | 2.861387  | -0.009939 |
| O | 1.084239  | -3.783814 | 0.008218  |
| C | 4.595916  | 0.353932  | 0.301319  |
| C | -0.909412 | 3.640718  | 0.368346  |
| O | 1.808880  | 4.545379  | -0.524277 |
| H | 1.978787  | -0.184550 | -1.496214 |
| C | 1.697584  | -1.473335 | 1.762267  |
| O | -2.004071 | 0.529611  | 0.091634  |
| C | -2.975581 | 0.094263  | 0.939819  |
| O | -2.739148 | -0.422916 | 2.012829  |
| C | -4.352807 | 0.333912  | 0.362339  |
| C | -4.709446 | -0.619319 | -0.807229 |
| C | -4.729733 | -2.088814 | -0.360943 |
| C | -6.057069 | -0.208926 | -1.418667 |
| H | 3.524423  | -3.185549 | 0.578198  |
| H | 3.443668  | -3.826927 | -1.056026 |
| H | 3.957579  | -1.654720 | -2.045003 |
| H | 5.163459  | -1.954271 | -0.797420 |
| H | 1.464327  | -2.484097 | -1.560918 |
| H | 1.852268  | 1.202879  | 1.207121  |
| H | 0.113773  | 1.193871  | -1.301768 |
| H | -0.577541 | 0.470774  | 1.586352  |
| H | -0.413875 | -1.178225 | -0.981092 |
| H | -0.709262 | -1.801111 | 0.651992  |
| H | 0.152775  | -3.759206 | -0.244143 |
| H | 5.645511  | 0.075813  | 0.350764  |
| H | 4.324986  | 1.309770  | 0.735401  |
| H | -1.890325 | 3.236348  | 0.591699  |
| H | -0.761553 | 4.713080  | 0.456026  |
| H | 1.251753  | -0.675961 | 2.362984  |
| H | 2.772377  | -1.464368 | 1.955789  |
| H | 1.291420  | -2.422010 | 2.123630  |
| H | -5.071594 | 0.211622  | 1.178082  |
| H | -4.403336 | 1.368979  | 0.005889  |
| H | -3.935258 | -0.499429 | -1.576584 |
| H | -4.958823 | -2.745502 | -1.207224 |
| H | -3.769682 | -2.405634 | 0.059558  |
| H | -5.494250 | -2.253542 | 0.407890  |
| H | -6.314787 | -0.856825 | -2.263448 |
| H | -6.035218 | 0.824308  | -1.782514 |
| H | -6.864322 | -0.289002 | -0.680121 |

B3LYP energy = -1155.18155914 a.u.

(1R,5S,6R,7R,8S,10R)-3, Conf. K

|   |           |           |           |
|---|-----------|-----------|-----------|
| C | 4.267677  | -1.931518 | -0.441415 |
| C | 4.688231  | -0.484011 | -0.763981 |
| C | 3.804196  | 0.532724  | -0.074112 |
| C | 2.331675  | 0.299374  | -0.356716 |
| C | 1.884683  | -1.135890 | 0.142475  |
| C | 2.764560  | -2.160336 | -0.640669 |
| C | 1.337119  | 1.311972  | 0.184925  |
| C | -0.092563 | 1.033209  | -0.311067 |
| C | -0.580356 | -0.294950 | 0.240394  |

|   |           |           |           |
|---|-----------|-----------|-----------|
| C | 0.394681  | -1.395439 | -0.217465 |
| O | 1.571615  | 2.687989  | -0.218440 |
| C | 0.377291  | 3.366591  | -0.177005 |
| C | -0.735921 | 2.364875  | -0.030501 |
| O | 2.403318  | -3.516072 | -0.367492 |
| C | 4.297068  | 1.513677  | 0.690260  |
| C | -1.983849 | 2.716787  | 0.284460  |
| O | 0.311106  | 4.567781  | -0.267695 |
| H | 2.217883  | 0.294418  | -1.453452 |
| C | 2.082133  | -1.307074 | 1.665992  |
| O | -1.895502 | -0.558639 | -0.319037 |
| C | -2.710906 | -1.401458 | 0.371065  |
| O | -2.408688 | -1.893736 | 1.439479  |
| C | -4.016592 | -1.625107 | -0.360485 |
| C | -4.933531 | -0.378197 | -0.417977 |
| C | -6.163019 | -0.675764 | -1.289068 |
| C | -5.351982 | 0.086946  | 0.985012  |
| H | 4.537513  | -2.166469 | 0.597464  |
| H | 4.813661  | -2.636923 | -1.077542 |
| H | 4.613503  | -0.333254 | -1.851858 |
| H | 5.737560  | -0.325384 | -0.496058 |
| H | 2.529639  | -2.034399 | -1.706182 |
| H | 1.358996  | 1.307713  | 1.282077  |
| H | -0.034705 | 0.929911  | -1.407037 |
| H | -0.680953 | -0.269399 | 1.328630  |
| H | 0.297241  | -1.476233 | -1.308518 |
| H | 0.087327  | -2.356348 | 0.201400  |
| H | 2.823553  | -3.797084 | 0.456259  |
| H | 5.368258  | 1.606668  | 0.849774  |
| H | 3.669664  | 2.267535  | 1.152675  |
| H | -2.778566 | 1.986154  | 0.381627  |
| H | -2.222859 | 3.763472  | 0.448609  |
| H | 1.396819  | -0.682745 | 2.244872  |
| H | 3.094992  | -1.051965 | 1.986205  |
| H | 1.871732  | -2.341555 | 1.957412  |
| H | -3.781708 | -1.943531 | -1.382859 |
| H | -4.531097 | -2.446913 | 0.146437  |
| H | -4.364758 | 0.428048  | -0.899632 |
| H | -6.809985 | 0.205075  | -1.362900 |
| H | -5.874718 | -0.966644 | -2.305346 |
| H | -6.759082 | -1.491317 | -0.861283 |
| H | -4.489859 | 0.323375  | 1.617887  |
| H | -5.929007 | -0.692042 | 1.497826  |
| H | -5.979410 | 0.982801  | 0.924265  |

B3LYP energy = -1155.18150631 a.u.

(1R,5S,6R,7R,8S,10R)-3, Conf. L

|   |           |           |           |
|---|-----------|-----------|-----------|
| C | 4.264481  | -1.936812 | -0.417908 |
| C | 4.683024  | -0.496472 | -0.767746 |
| C | 3.803482  | 0.533922  | -0.092799 |
| C | 2.328681  | 0.298337  | -0.363139 |
| C | 1.887730  | -1.132691 | 0.153839  |
| C | 2.766473  | -2.164580 | -0.622922 |
| C | 1.338600  | 1.311459  | 0.185022  |
| C | -0.093008 | 1.035593  | -0.306750 |
| C | -0.585657 | -0.289219 | 0.245751  |

|   |           |           |           |
|---|-----------|-----------|-----------|
| C | 0.393585  | -1.395065 | -0.193904 |
| O | 1.570990  | 2.688654  | -0.216626 |
| C | 0.378026  | 3.367857  | -0.170157 |
| C | -0.735492 | 2.366664  | -0.021932 |
| O | 2.504313  | -3.517677 | -0.239616 |
| C | 4.300474  | 1.527384  | 0.652526  |
| C | -1.981701 | 2.717983  | 0.300129  |
| O | 0.311142  | 4.569142  | -0.258681 |
| H | 2.206081  | 0.288460  | -1.459180 |
| C | 2.097010  | -1.296589 | 1.676117  |
| O | -1.896371 | -0.549331 | -0.326774 |
| C | -2.706370 | -1.422363 | 0.331584  |
| O | -2.392495 | -1.963818 | 1.372449  |
| C | -4.018772 | -1.612863 | -0.397411 |
| C | -4.929575 | -0.360203 | -0.402759 |
| C | -6.170338 | -0.622009 | -1.269282 |
| C | -5.328879 | 0.059673  | 1.019940  |
| H | 4.518316  | -2.163401 | 0.623484  |
| H | 4.810770  | -2.655005 | -1.038366 |
| H | 4.606598  | -0.361530 | -1.858001 |
| H | 5.732892  | -0.333814 | -0.504643 |
| H | 2.538199  | -2.043037 | -1.695616 |
| H | 1.366245  | 1.302613  | 1.281999  |
| H | -0.038413 | 0.932678  | -1.402939 |
| H | -0.695268 | -0.260824 | 1.332999  |
| H | 0.286509  | -1.496088 | -1.283651 |
| H | 0.073536  | -2.336874 | 0.262486  |
| H | 1.647951  | -3.795191 | -0.588363 |
| H | 5.372561  | 1.620612  | 0.805499  |
| H | 3.676719  | 2.289302  | 1.106394  |
| H | -2.776492 | 1.987700  | 0.399615  |
| H | -2.219266 | 3.764316  | 0.468499  |
| H | 3.082052  | -0.947858 | 1.993732  |
| H | 2.003336  | -2.352559 | 1.943614  |
| H | 1.354202  | -0.743496 | 2.257608  |
| H | -3.793715 | -1.894512 | -1.432843 |
| H | -4.533395 | -2.450332 | 0.083076  |
| H | -4.361776 | 0.458520  | -0.863890 |
| H | -5.895175 | -0.880672 | -2.297878 |
| H | -6.767135 | -1.447550 | -0.862175 |
| H | -6.812537 | 0.264543  | -1.307053 |
| H | -5.902988 | -0.733519 | 1.513795  |
| H | -4.458194 | 0.272128  | 1.649647  |
| H | -5.952886 | 0.959581  | 0.996931  |

B3LYP energy = -1155.18148076 a.u.

(1R,5S,6R,7R,8S,10R)-3, Conf. M

|   |           |           |           |
|---|-----------|-----------|-----------|
| C | 3.672388  | -2.717038 | -0.230523 |
| C | 4.497064  | -1.441110 | -0.493497 |
| C | 3.857734  | -0.218012 | 0.129441  |
| C | 2.408853  | -0.046308 | -0.288764 |
| C | 1.549489  | -1.312324 | 0.128011  |
| C | 2.195079  | -2.526085 | -0.593746 |
| C | 1.671662  | 1.189193  | 0.200418  |
| C | 0.276234  | 1.306929  | -0.435184 |
| C | -0.599549 | 0.155191  | 0.024625  |



|   |           |           |           |
|---|-----------|-----------|-----------|
| C | 0.084048  | -1.165950 | -0.372381 |
| O | 2.297793  | 2.459421  | -0.126198 |
| C | 1.325639  | 3.430200  | -0.168098 |
| C | -0.020246 | 2.757847  | -0.167608 |
| O | 1.421386  | -3.689081 | -0.279432 |
| C | 4.523021  | 0.599722  | 0.953080  |
| C | -1.159892 | 3.420774  | 0.037792  |
| O | 1.587356  | 4.607042  | -0.215420 |
| H | 2.399036  | -0.010353 | -1.390730 |
| C | 1.549514  | -1.539543 | 1.657920  |
| O | -1.875520 | 0.259307  | -0.663010 |
| C | -2.966507 | -0.275962 | -0.049409 |
| O | -2.924990 | -0.783103 | 1.052521  |
| C | -4.185003 | -0.140103 | -0.944007 |
| C | -5.544161 | -0.541313 | -0.336011 |
| C | -5.631339 | -2.041623 | -0.010969 |
| C | -5.927090 | 0.328819  | 0.872155  |
| H | 3.747023  | -3.006438 | 0.823355  |
| H | 4.082185  | -3.549471 | -0.818735 |
| H | 4.568124  | -1.284635 | -1.581029 |
| H | 5.520259  | -1.567994 | -0.126247 |
| H | 2.122478  | -2.332471 | -1.677880 |
| H | 1.583982  | 1.162787  | 1.293774  |
| H | 0.411886  | 1.202200  | -1.524170 |
| H | -0.795710 | 0.202019  | 1.098781  |
| H | 0.068496  | -1.219583 | -1.469449 |
| H | -0.503863 | -2.008758 | -0.001536 |
| H | 1.822995  | -4.456858 | -0.706038 |
| H | 5.560247  | 0.402374  | 1.211442  |
| H | 4.080141  | 1.497368  | 1.369665  |
| H | -2.121939 | 2.920822  | 0.028051  |
| H | -1.136592 | 4.491376  | 0.218818  |
| H | 0.940872  | -0.798290 | 2.182560  |
| H | 2.555339  | -1.489208 | 2.080958  |
| H | 1.128327  | -2.523439 | 1.878309  |
| H | -4.215079 | 0.899306  | -1.294202 |
| H | -3.979701 | -0.740999 | -1.840448 |
| H | -6.276377 | -0.336911 | -1.130487 |
| H | -4.938950 | -2.312825 | 0.790349  |
| H | -6.645528 | -2.303523 | 0.310471  |
| H | -5.394563 | -2.652855 | -0.890219 |
| H | -6.946213 | 0.098542  | 1.201475  |
| H | -5.894352 | 1.396004  | 0.621087  |
| H | -5.252343 | 0.153299  | 1.714923  |

B3LYP energy = -1155.18076818 a.u.

(1R,5S,6R,7R,8S,10R)-**3**, Conf. N

|   |          |           |           |
|---|----------|-----------|-----------|
| C | 3.039902 | -3.115305 | -0.288611 |
| C | 4.024963 | -2.007552 | -0.712206 |
| C | 3.675392 | -0.672869 | -0.088244 |
| C | 2.233630 | -0.273920 | -0.344201 |
| C | 1.235771 | -1.361396 | 0.235448  |
| C | 1.580624 | -2.689941 | -0.490312 |
| C | 1.774469 | 1.083494  | 0.160401  |
| C | 0.351179 | 1.414666  | -0.318947 |

|   |           |           |           |
|---|-----------|-----------|-----------|
| C | -0.641475 | 0.444278  | 0.296225  |
| C | -0.236355 | -0.986767 | -0.100443 |
| O | 2.556899  | 2.218194  | -0.300459 |
| C | 1.759163  | 3.337461  | -0.284791 |
| C | 0.330797  | 2.903249  | -0.099083 |
| O | 0.671280  | -3.694765 | -0.028225 |
| C | 4.562983  | 0.049758  | 0.604425  |
| C | -0.651779 | 3.758450  | 0.190568  |
| O | 2.202970  | 4.450847  | -0.423327 |
| H | 2.094566  | -0.273460 | -1.437896 |
| C | 1.386347  | -1.535115 | 1.765274  |
| O | -1.953600 | 0.742552  | -0.253771 |
| C | -3.038865 | 0.429927  | 0.504764  |
| O | -2.956258 | -0.067345 | 1.610369  |
| C | -4.331380 | 0.791679  | -0.197558 |
| C | -5.212412 | -0.426980 | -0.589034 |
| C | -4.477139 | -1.383407 | -1.540421 |
| C | -5.782926 | -1.167841 | 0.629122  |
| H | 3.193633  | -3.377468 | 0.763852  |
| H | 3.233138  | -4.024762 | -0.873884 |
| H | 3.989175  | -1.903256 | -1.807743 |
| H | 5.050143  | -2.293538 | -0.456907 |
| H | 1.409013  | -2.522913 | -1.567765 |
| H | 1.815924  | 1.107757  | 1.256533  |
| H | 0.336089  | 1.251284  | -1.409122 |
| H | -0.701973 | 0.560712  | 1.381362  |
| H | -0.394841 | -1.078120 | -1.183380 |
| H | -0.903308 | -1.703766 | 0.383410  |
| H | 0.888266  | -4.533223 | -0.455604 |
| H | 5.577858  | -0.311195 | 0.750403  |
| H | 4.328806  | 1.024080  | 1.018261  |
| H | -1.678663 | 3.432249  | 0.311701  |
| H | -0.429322 | 4.815018  | 0.307626  |
| H | 2.431441  | -1.637620 | 2.066559  |
| H | 0.843686  | -2.428487 | 2.083760  |
| H | 0.972435  | -0.687210 | 2.317302  |
| H | -4.896881 | 1.430366  | 0.490896  |
| H | -4.096770 | 1.375472  | -1.091782 |
| H | -6.057834 | 0.005954  | -1.141867 |
| H | -4.077616 | -0.855847 | -2.413798 |
| H | -3.641202 | -1.884340 | -1.037777 |
| H | -5.155880 | -2.163980 | -1.900681 |
| H | -4.988503 | -1.613808 | 1.234371  |
| H | -6.458817 | -1.966893 | 0.304432  |
| H | -6.350229 | -0.490097 | 1.276778  |

B3LYP energy = -1155.18060887 a.u.

**Table S32.** Cartesian coordinates and energies of the low-energy conformers calculated at the B3LYP/6-311+G(2d,p) *in vacuo* level.

|                                    |           |           |           |                                    |           |           |           |
|------------------------------------|-----------|-----------|-----------|------------------------------------|-----------|-----------|-----------|
| (1R,5S,6S,7S,10R)-2, Conf. A       |           |           |           | C                                  | 2.426557  | -1.078298 | -0.475150 |
| C                                  | 3.464632  | 0.018681  | -0.246373 | C                                  | -0.890130 | 0.927570  | -0.036798 |
| C                                  | 2.934828  | 1.404791  | -0.654303 | C                                  | -1.854879 | -0.190061 | -0.460908 |
| C                                  | 1.583491  | 1.667843  | -0.037682 | C                                  | -1.401284 | -1.541578 | 0.109114  |
| C                                  | 0.570577  | 0.588656  | -0.375343 | C                                  | 0.045501  | -1.871358 | -0.266067 |
| C                                  | 1.056845  | -0.787044 | 0.192978  | C                                  | -3.337631 | 0.161448  | -0.165154 |
| C                                  | 2.431507  | -1.078590 | -0.480026 | C                                  | -4.297842 | -0.773463 | -0.913148 |
| C                                  | -0.890328 | 0.928837  | -0.036882 | C                                  | -3.689421 | 0.206935  | 1.328382  |
| C                                  | -1.853504 | -0.191849 | -0.455864 | O                                  | -1.302011 | 2.110147  | -0.736024 |
| C                                  | -1.403509 | -1.535667 | 0.133621  | C                                  | 1.367569  | 2.705844  | 0.774137  |
| C                                  | 0.044633  | -1.870188 | -0.235233 | O                                  | 2.897637  | -2.341412 | 0.006797  |
| C                                  | -3.338203 | 0.160780  | -0.172543 | H                                  | 0.591049  | 0.492267  | -1.473632 |
| C                                  | -4.293334 | -0.783320 | -0.915487 | C                                  | 1.178955  | -0.790598 | 1.717213  |
| C                                  | -3.698372 | 0.224332  | 1.318214  | H                                  | 3.734313  | 0.034325  | 0.821505  |
| O                                  | -1.302917 | 2.106721  | -0.742051 | H                                  | 4.371919  | -0.207953 | -0.797544 |
| C                                  | 1.365427  | 2.710897  | 0.763455  | H                                  | 3.645634  | 2.188082  | -0.373767 |
| O                                  | 3.027136  | -2.299280 | -0.031344 | H                                  | 2.837221  | 1.440760  | -1.747740 |
| H                                  | 0.591217  | 0.485260  | -1.470766 | H                                  | 2.248277  | -1.156703 | -1.558184 |
| C                                  | 1.199677  | -0.775553 | 1.725235  | H                                  | -0.984820 | 1.098499  | 1.043033  |
| H                                  | 3.747950  | 0.021415  | 0.809117  | H                                  | -1.768221 | -0.247072 | -1.554509 |
| H                                  | 4.366550  | -0.224970 | -0.812590 | H                                  | -2.052618 | -2.334262 | -0.266904 |
| H                                  | 3.648043  | 2.180382  | -0.368265 | H                                  | -1.515896 | -1.549872 | 1.196397  |
| H                                  | 2.840601  | 1.442549  | -1.746909 | H                                  | 0.110569  | -1.978400 | -1.355790 |
| H                                  | 2.246384  | -1.151105 | -1.562265 | H                                  | 0.339515  | -2.833893 | 0.157089  |
| H                                  | -0.985610 | 1.104089  | 1.042381  | H                                  | -3.489431 | 1.166474  | -0.566327 |
| H                                  | -1.760645 | -0.261242 | -1.548243 | H                                  | -4.252929 | -1.798124 | -0.533910 |
| H                                  | -2.055014 | -2.333548 | -0.230702 | H                                  | -5.330445 | -0.432711 | -0.801433 |
| H                                  | -1.516668 | -1.527046 | 1.220864  | H                                  | -4.072732 | -0.801749 | -1.982819 |
| H                                  | 0.106550  | -2.001141 | -1.323267 | H                                  | -4.717341 | 0.553982  | 1.461507  |
| H                                  | 0.319026  | -2.829319 | 0.217126  | H                                  | -3.044129 | 0.890641  | 1.884760  |
| H                                  | -3.487657 | 1.160814  | -0.586636 | H                                  | -3.618366 | -0.778785 | 1.796518  |
| H                                  | -4.062156 | -0.823523 | -1.983480 | H                                  | -0.620619 | 2.782967  | -0.620867 |
| H                                  | -4.250994 | -1.803698 | -0.524353 | H                                  | 0.420956  | 2.877620  | 1.273283  |
| H                                  | -5.326614 | -0.441777 | -0.813784 | H                                  | 2.155764  | 3.419554  | 0.986388  |
| H                                  | -4.727154 | 0.572366  | 1.440965  | H                                  | 3.740336  | -2.538173 | -0.416150 |
| H                                  | -3.056674 | 0.915353  | 1.869507  | H                                  | 1.826864  | 0.008918  | 2.076057  |
| H                                  | -3.630145 | -0.755451 | 1.799293  | H                                  | 0.209747  | -0.655494 | 2.197884  |
| H                                  | -0.618971 | 2.778519  | -0.635174 | H                                  | 1.592734  | -1.741504 | 2.053940  |
| H                                  | 0.417369  | 2.886734  | 1.258571  | B3LYP energy = -737.915317555 a.u. |           |           |           |
| H                                  | 2.153316  | 3.425572  | 0.973306  | (1R,5S,6S,7S,10R)-2, Conf. C       |           |           |           |
| H                                  | 2.489401  | -3.039186 | -0.332619 | C                                  | 3.463270  | 0.026395  | -0.263342 |
| H                                  | 1.822180  | 0.048418  | 2.072370  | C                                  | 2.927924  | 1.414629  | -0.660098 |
| H                                  | 0.232748  | -0.676925 | 2.219718  | C                                  | 1.582054  | 1.666017  | -0.028221 |
| H                                  | 1.657003  | -1.707705 | 2.060397  | C                                  | 0.569975  | 0.590221  | -0.376216 |
| B3LYP energy = -737.915663422 a.u. |           |           |           | C                                  | 1.051300  | -0.794157 | 0.175025  |
| (1R,5S,6S,7S,10R)-2, Conf. B       |           |           |           | C                                  | 2.432273  | -1.083311 | -0.484467 |
| C                                  | 3.460101  | 0.025221  | -0.236205 | C                                  | -0.891597 | 0.928402  | -0.035988 |
| C                                  | 2.933115  | 1.410078  | -0.655218 | C                                  | -1.857142 | -0.188422 | -0.460553 |
| C                                  | 1.582482  | 1.668414  | -0.035046 | C                                  | -1.402133 | -1.541667 | 0.104993  |
| C                                  | 0.570961  | 0.589930  | -0.378009 | C                                  | 0.043314  | -1.868852 | -0.277790 |
| C                                  | 1.052220  | -0.791632 | 0.182029  | C                                  | -3.339250 | 0.162485  | -0.161143 |

|   |           |           |           |
|---|-----------|-----------|-----------|
| C | -4.300936 | -0.769182 | -0.911249 |
| C | -3.688733 | 0.202380  | 1.333108  |
| O | -1.302052 | 2.111795  | -0.733634 |
| C | 1.369653  | 2.695466  | 0.791845  |
| O | 2.966169  | -2.356767 | -0.114293 |
| H | 0.591522  | 0.496169  | -1.472124 |
| C | 1.172741  | -0.797470 | 1.710270  |
| H | 3.759175  | 0.043550  | 0.791665  |
| H | 4.361520  | -0.213321 | -0.837634 |
| H | 3.641753  | 2.191239  | -0.377861 |
| H | 2.823585  | 1.454418  | -1.751377 |
| H | 2.254499  | -1.178141 | -1.560850 |
| H | -0.987254 | 1.098908  | 1.043961  |
| H | -1.772499 | -0.243172 | -1.554324 |
| H | -2.055002 | -2.333084 | -0.270845 |
| H | -1.513289 | -1.552950 | 1.192883  |
| H | 0.104623  | -1.965964 | -1.368339 |
| H | 0.339628  | -2.836595 | 0.132717  |
| H | -3.491206 | 1.169088  | -0.558265 |
| H | -4.255666 | -1.795408 | -0.536325 |
| H | -5.333237 | -0.428658 | -0.796347 |
| H | -4.077719 | -0.793090 | -1.981368 |
| H | -4.715923 | 0.550307  | 1.469185  |
| H | -3.041888 | 0.883065  | 1.891505  |
| H | -3.618559 | -0.785444 | 1.796999  |
| H | -0.622326 | 2.785562  | -0.613901 |
| H | 0.424426  | 2.862601  | 1.295256  |
| H | 2.157757  | 3.408567  | 1.006501  |
| H | 3.324961  | -2.295635 | 0.778258  |
| H | 1.872447  | -0.044424 | 2.073475  |
| H | 0.215369  | -0.597570 | 2.191399  |
| H | 1.504084  | -1.777850 | 2.062123  |

B3LYP energy = -737.915222647 a.u.

(1R,5S,6S,7S,10R)-2, Conf. D

|   |           |           |           |
|---|-----------|-----------|-----------|
| C | 3.415985  | 0.426499  | -0.262068 |
| C | 2.671042  | 1.730552  | -0.596696 |
| C | 1.307477  | 1.748836  | 0.048989  |
| C | 0.466492  | 0.545361  | -0.338900 |
| C | 1.170231  | -0.765489 | 0.150904  |
| C | 2.562847  | -0.805280 | -0.545311 |
| C | -1.024489 | 0.638316  | 0.031395  |
| C | -1.815537 | -0.589552 | -0.442527 |
| C | -1.144594 | -1.878205 | 0.059168  |
| C | 0.331848  | -1.967260 | -0.331013 |
| C | -3.331623 | -0.579351 | -0.084503 |
| C | -3.629624 | -0.122387 | 1.350177  |
| C | -4.187613 | 0.203963  | -1.089296 |
| O | -1.615382 | 1.787392  | -0.589029 |
| C | 0.951950  | 2.697027  | 0.916215  |
| O | 3.346333  | -1.939603 | -0.164090 |
| H | 0.485441  | 0.504079  | -1.438460 |
| C | 1.331451  | -0.814570 | 1.680502  |
| H | 3.708146  | 0.422608  | 0.791016  |
| H | 4.337435  | 0.355045  | -0.844444 |
| H | 3.260716  | 2.593265  | -0.280359 |

|   |           |           |           |
|---|-----------|-----------|-----------|
| H | 2.551664  | 1.804205  | -1.684966 |
| H | 2.375348  | -0.851053 | -1.628460 |
| H | -1.124021 | 0.726634  | 1.120369  |
| H | -1.745867 | -0.589394 | -1.538137 |
| H | -1.677993 | -2.737204 | -0.357931 |
| H | -1.251418 | -1.958032 | 1.145322  |
| H | 0.400023  | -2.028669 | -1.424955 |
| H | 0.754513  | -2.896227 | 0.066785  |
| H | -3.648236 | -1.627592 | -0.156757 |
| H | -3.038394 | -0.666748 | 2.091437  |
| H | -3.433132 | 0.945040  | 1.474188  |
| H | -4.682878 | -0.291282 | 1.587910  |
| H | -3.950167 | 1.267081  | -1.069002 |
| H | -5.250212 | 0.080959  | -0.860174 |
| H | -4.025195 | -0.156137 | -2.108943 |
| H | -1.031540 | 2.541665  | -0.442958 |
| H | 0.001128  | 2.694631  | 1.436601  |
| H | 1.626730  | 3.510635  | 1.157304  |
| H | 2.931306  | -2.737077 | -0.509076 |
| H | 1.931882  | -1.681244 | 1.960936  |
| H | 1.823904  | 0.075686  | 2.070302  |
| H | 0.368158  | -0.893939 | 2.185178  |

B3LYP energy = -737.914007817 a.u.

(1R,5S,6S,7S,10R)-2, Conf. E

|   |           |           |           |
|---|-----------|-----------|-----------|
| C | 3.410399  | 0.430588  | -0.253417 |
| C | 2.668433  | 1.734474  | -0.599060 |
| C | 1.306780  | 1.748833  | 0.050693  |
| C | 0.466776  | 0.546198  | -0.340879 |
| C | 1.166387  | -0.770427 | 0.141397  |
| C | 2.557135  | -0.807056 | -0.540347 |
| C | -1.023974 | 0.636573  | 0.031864  |
| C | -1.816122 | -0.588267 | -0.448251 |
| C | -1.142275 | -1.881983 | 0.037611  |
| C | 0.332257  | -1.967872 | -0.357283 |
| C | -3.330883 | -0.579443 | -0.084395 |
| C | -3.623703 | -0.131755 | 1.354249  |
| C | -4.191092 | 0.210189  | -1.080678 |
| O | -1.614938 | 1.790366  | -0.581405 |
| C | 0.955666  | 2.692550  | 0.924544  |
| O | 3.225899  | -2.003967 | -0.127688 |
| H | 0.484238  | 0.509575  | -1.440331 |
| C | 1.315693  | -0.830425 | 1.673090  |
| H | 3.694101  | 0.431970  | 0.801848  |
| H | 4.339267  | 0.370205  | -0.831634 |
| H | 3.257531  | 2.599561  | -0.287936 |
| H | 2.547813  | 1.800570  | -1.687516 |
| H | 2.375675  | -0.858603 | -1.624324 |
| H | -1.122635 | 0.719613  | 1.121166  |
| H | -1.750773 | -0.578272 | -1.544085 |
| H | -1.676665 | -2.735794 | -0.388983 |
| H | -1.249304 | -1.975496 | 1.122947  |
| H | 0.400505  | -2.008492 | -1.451442 |
| H | 0.774164  | -2.894619 | 0.014206  |
| H | -3.647550 | -1.627210 | -0.161843 |
| H | -4.675968 | -0.302743 | 1.595252  |

|   |           |           |           |
|---|-----------|-----------|-----------|
| H | -3.029027 | -0.680617 | 2.089393  |
| H | -3.427524 | 0.935094  | 1.484442  |
| H | -5.252884 | 0.086471  | -0.847859 |
| H | -4.033127 | -0.143944 | -2.103131 |
| H | -3.953046 | 1.273148  | -1.055245 |
| H | -1.031792 | 2.543938  | -0.429911 |
| H | 0.007079  | 2.686823  | 1.448828  |
| H | 1.631072  | 3.505418  | 1.166639  |
| H | 4.082552  | -2.045327 | -0.566011 |
| H | 0.345110  | -0.869019 | 2.168108  |
| H | 1.873240  | -1.724103 | 1.954745  |
| H | 1.841404  | 0.037605  | 2.070595  |

B3LYP energy = -737.913699202 a.u.

(1R,5S,6S,7S,10R)-2, Conf. F

|   |           |           |           |
|---|-----------|-----------|-----------|
| C | 3.413617  | 0.431181  | -0.278348 |
| C | 2.664787  | 1.736820  | -0.601386 |
| C | 1.307538  | 1.745936  | 0.056946  |
| C | 0.466046  | 0.546544  | -0.340166 |
| C | 1.165363  | -0.772461 | 0.133349  |
| C | 2.563350  | -0.811874 | -0.550027 |
| C | -1.025311 | 0.637245  | 0.031841  |
| C | -1.818695 | -0.586690 | -0.448888 |
| C | -1.143634 | -1.881717 | 0.032742  |
| C | 0.329070  | -1.965084 | -0.369329 |
| C | -3.332715 | -0.578316 | -0.082158 |
| C | -3.622862 | -0.135536 | 1.358577  |
| C | -4.194253 | 0.215234  | -1.074148 |
| O | -1.615080 | 1.792458  | -0.578934 |
| C | 0.959411  | 2.683080  | 0.939161  |
| O | 3.291508  | -2.004583 | -0.248752 |
| H | 0.484699  | 0.514010  | -1.439764 |
| C | 1.310061  | -0.836900 | 1.665020  |
| H | 3.715695  | 0.441883  | 0.775128  |
| H | 4.330752  | 0.362689  | -0.868465 |
| H | 3.255598  | 2.599975  | -0.287912 |
| H | 2.536362  | 1.811686  | -1.688221 |
| H | 2.386046  | -0.879112 | -1.628472 |
| H | -1.124639 | 0.718879  | 1.121353  |
| H | -1.755452 | -0.575076 | -1.544742 |
| H | -1.679833 | -2.734539 | -0.393343 |
| H | -1.246871 | -1.977321 | 1.118518  |
| H | 0.392287  | -1.997038 | -1.463764 |
| H | 0.773997  | -2.895590 | -0.010030 |
| H | -3.649964 | -1.625642 | -0.162742 |
| H | -4.674762 | -0.306923 | 1.600701  |
| H | -3.027473 | -0.687409 | 2.090992  |
| H | -3.426192 | 0.930791  | 1.492332  |
| H | -5.255646 | 0.091191  | -0.839854 |
| H | -4.038292 | -0.135444 | -2.098041 |
| H | -3.955718 | 1.277985  | -1.045504 |
| H | -1.032427 | 2.545795  | -0.424197 |
| H | 0.011779  | 2.674733  | 1.465234  |
| H | 1.635288  | 3.494729  | 1.184064  |

|   |          |           |          |
|---|----------|-----------|----------|
| H | 3.656412 | -1.929304 | 0.640205 |
| H | 0.341406 | -0.810926 | 2.164075 |
| H | 1.792491 | -1.772006 | 1.961107 |
| H | 1.892385 | -0.005788 | 2.063719 |

B3LYP energy = -737.913591030 a.u.

(1R,5S,6S,7S,10R)-2, Conf. G

|   |           |           |           |
|---|-----------|-----------|-----------|
| C | 3.472361  | -0.006395 | -0.180788 |
| C | 2.974249  | 1.381937  | -0.609958 |
| C | 1.606683  | 1.679893  | -0.040564 |
| C | 0.579579  | 0.612378  | -0.382635 |
| C | 1.044965  | -0.784476 | 0.163262  |
| C | 2.428638  | -1.084005 | -0.467084 |
| C | -0.882883 | 0.938143  | -0.018310 |
| C | -1.855441 | -0.176179 | -0.461309 |
| C | -1.401996 | -1.546543 | 0.060827  |
| C | 0.046245  | -1.858084 | -0.315628 |
| C | -3.333892 | 0.164390  | -0.133879 |
| C | -4.306152 | -0.711801 | -0.935378 |
| C | -3.673459 | 0.108694  | 1.362484  |
| O | -1.286739 | 2.198125  | -0.569938 |
| C | 1.384316  | 2.757975  | 0.706371  |
| O | 2.861417  | -2.368033 | -0.003130 |
| H | 0.595113  | 0.511514  | -1.481852 |
| C | 1.144733  | -0.795330 | 1.700770  |
| H | 3.709797  | -0.009002 | 0.885858  |
| H | 4.398978  | -0.250499 | -0.713267 |
| H | 3.687678  | 2.152103  | -0.310096 |
| H | 2.916924  | 1.412822  | -1.706389 |
| H | 2.275965  | -1.136464 | -1.556155 |
| H | -0.962906 | 1.085420  | 1.061196  |
| H | -1.784552 | -0.209088 | -1.559779 |
| H | -2.051234 | -2.328020 | -0.342527 |
| H | -1.520132 | -1.590070 | 1.146413  |
| H | 0.119456  | -1.938746 | -1.407470 |
| H | 0.343726  | -2.828832 | 0.085210  |
| H | -3.481036 | 1.196611  | -0.461500 |
| H | -4.099159 | -0.659203 | -2.007991 |
| H | -4.253435 | -1.762361 | -0.636474 |
| H | -5.337224 | -0.383286 | -0.781179 |
| H | -4.691193 | 0.470219  | 1.529955  |
| H | -3.007056 | 0.733068  | 1.962035  |
| H | -3.623411 | -0.910530 | 1.754487  |
| H | -1.040236 | 2.220475  | -1.502087 |
| H | 0.407851  | 3.003153  | 1.099730  |
| H | 2.188684  | 3.452353  | 0.925004  |
| H | 3.735158  | -2.546833 | -0.366918 |
| H | 1.767860  | 0.016698  | 2.075026  |
| H | 0.165821  | -0.685814 | 2.167878  |
| H | 1.573458  | -1.740011 | 2.036352  |

B3LYP energy = -737.912271707 a.u.

**Table S33.** Cartesian coordinates and energies of the low-energy conformers calculated at the M06-2X/6-31G(d) *in vacuo* level.

|                          |           |           |           |                                    |           |           |           |
|--------------------------|-----------|-----------|-----------|------------------------------------|-----------|-----------|-----------|
| (2S,6R,7S,8R)-1, Conf. A |           |           |           | H                                  | 4.415767  | -1.177507 | -3.040125 |
| C                        | -4.306756 | -0.572748 | -0.651391 | H                                  | 5.753913  | -1.357861 | -1.890611 |
| C                        | -3.273758 | 0.444273  | -1.050281 | M062X energy = -1154.59150837 a.u. |           |           |           |
| C                        | -2.851567 | 1.507724  | -0.357286 | (2S,6R,7S,8R)-1, Conf. B           |           |           |           |
| C                        | -3.525451 | 2.073441  | 0.866223  | C                                  | -4.469044 | -0.215458 | 0.025184  |
| C                        | -2.402178 | -1.698429 | 0.532692  | C                                  | -3.458084 | 0.854779  | 0.389648  |
| C                        | -3.595075 | -1.919148 | -0.361999 | C                                  | -2.671674 | 1.541320  | -0.446699 |
| C                        | -0.363448 | 1.214735  | -0.672571 | C                                  | -2.815082 | 1.527173  | -1.946581 |
| C                        | -0.146554 | 0.565559  | 0.723706  | C                                  | -2.471835 | -1.745432 | 0.150268  |
| C                        | 0.013730  | -0.971558 | 0.650576  | C                                  | -3.770611 | -1.475269 | -0.561951 |
| C                        | -1.184401 | -1.598676 | -0.006622 | C                                  | -0.200332 | 1.434977  | -0.056054 |
| O                        | 0.837605  | 1.937727  | -0.987150 | C                                  | -0.070322 | 0.267875  | 0.965655  |
| C                        | 1.672140  | 2.034809  | 0.074492  | C                                  | -0.035636 | -1.126254 | 0.299153  |
| C                        | 1.102447  | 1.246613  | 1.206203  | C                                  | -1.324887 | -1.372675 | -0.424473 |
| O                        | 2.699549  | 2.654855  | 0.041699  | O                                  | 0.938002  | 2.292077  | 0.137932  |
| C                        | 1.717233  | 1.178366  | 2.382455  | C                                  | 1.771906  | 1.848276  | 1.106651  |
| C                        | -1.548563 | 2.187841  | -0.744268 | C                                  | 1.208370  | 0.595442  | 1.685619  |
| C                        | -2.703388 | -1.378293 | 1.971942  | O                                  | 2.791022  | 2.411766  | 1.397672  |
| O                        | -5.230236 | -0.849385 | -1.691087 | C                                  | 1.841788  | -0.067497 | 2.647695  |
| O                        | 1.157745  | -1.246459 | -0.167065 | C                                  | -1.470332 | 2.289600  | 0.083903  |
| C                        | 2.278286  | -1.719947 | 0.436467  | C                                  | -2.585041 | -2.202277 | 1.580307  |
| O                        | 2.359734  | -1.936354 | 1.618598  | O                                  | -5.426983 | 0.174405  | -0.946188 |
| C                        | 3.377733  | -1.886539 | -0.579757 | O                                  | 1.038608  | -1.119694 | -0.647724 |
| C                        | 3.953956  | -0.523293 | -1.010734 | C                                  | 2.161666  | -1.823114 | -0.355239 |
| C                        | 4.654489  | 0.165648  | 0.159411  | O                                  | 2.276325  | -2.528770 | 0.614195  |
| C                        | 4.914878  | -0.714848 | -2.182515 | C                                  | 3.222482  | -1.536799 | -1.385869 |
| H                        | -4.839138 | -0.251462 | 0.255108  | C                                  | 3.801422  | -0.119794 | -1.194263 |
| H                        | -2.716166 | 0.155431  | -1.944894 | C                                  | 4.593554  | -0.024851 | 0.108926  |
| H                        | -4.457993 | 1.567341  | 1.122596  | C                                  | 4.675918  | 0.252776  | -2.390002 |
| H                        | -3.751316 | 3.133683  | 0.699254  | H                                  | -4.986584 | -0.511160 | 0.950870  |
| H                        | -3.280159 | -2.321794 | -1.330880 | H                                  | -3.257068 | 0.949253  | 1.458107  |
| H                        | -4.327146 | -2.611544 | 0.068874  | H                                  | -2.915235 | 2.554304  | -2.318247 |
| H                        | -2.861439 | 2.035784  | 1.739489  | H                                  | -1.918276 | 1.113192  | -2.425476 |
| H                        | -1.001344 | 0.772221  | 1.377464  | H                                  | -3.583548 | -1.269101 | -1.620687 |
| H                        | 0.203001  | -1.359901 | 1.656128  | H                                  | -4.470901 | -2.316337 | -0.500924 |
| H                        | -1.052926 | -1.826355 | -1.063513 | H                                  | -3.686251 | 0.957212  | -2.269244 |
| H                        | 1.338104  | 0.576620  | 3.203044  | H                                  | -0.926730 | 0.275761  | 1.651824  |
| H                        | 2.643088  | 1.727400  | 2.532718  | H                                  | 0.174059  | -1.883197 | 1.059920  |
| H                        | -1.340858 | 3.026331  | -0.067670 | H                                  | -1.341337 | -1.023920 | -1.456848 |
| H                        | -0.467941 | 0.446606  | -1.442613 | H                                  | 1.467631  | -1.001283 | 3.056470  |
| H                        | -1.590969 | 2.601116  | -1.758104 | H                                  | 2.780199  | 0.322397  | 3.032904  |
| H                        | -3.388890 | -2.121683 | 2.393480  | H                                  | -1.597817 | 2.556494  | 1.139705  |
| H                        | -3.201824 | -0.403175 | 2.057405  | H                                  | -0.116878 | 1.052154  | -1.078357 |
| H                        | -1.806018 | -1.352350 | 2.595484  | H                                  | -1.301956 | 3.216247  | -0.477118 |
| H                        | -5.647705 | -0.013640 | -1.942534 | H                                  | -2.951084 | -1.388678 | 2.222866  |
| H                        | 4.161682  | -2.501882 | -0.128151 | H                                  | -1.634253 | -2.548768 | 1.991951  |
| H                        | 2.969250  | -2.409051 | -1.451292 | H                                  | -3.309093 | -3.019864 | 1.664858  |
| H                        | 3.117411  | 0.104489  | -1.346018 | H                                  | -5.817092 | 1.009986  | -0.651865 |
| H                        | 5.008170  | 1.157770  | -0.132813 | H                                  | 4.011024  | -2.287616 | -1.280545 |
| H                        | 3.984353  | 0.292372  | 1.015206  | H                                  | 2.774220  | -1.623633 | -2.381305 |
| H                        | 5.513791  | -0.431831 | 0.487684  | H                                  | 2.956091  | 0.581374  | -1.149955 |
| H                        | 5.325616  | 0.246609  | -2.505144 |                                    |           |           |           |

|   |          |           |           |
|---|----------|-----------|-----------|
| H | 4.910992 | 1.004632  | 0.295224  |
| H | 4.000543 | -0.352102 | 0.968328  |
| H | 5.484980 | -0.661666 | 0.055194  |
| H | 5.099396 | 1.253334  | -2.261381 |
| H | 4.105669 | 0.240143  | -3.324426 |
| H | 5.508179 | -0.454222 | -2.490214 |

M062X energy = -1154.59081141 a.u.

(2S,6R,7S,8R)-1, Conf. C

|   |           |           |           |
|---|-----------|-----------|-----------|
| C | -4.419495 | -0.792460 | -0.478795 |
| C | -3.509182 | 0.322760  | -0.912763 |
| C | -3.111958 | 1.388331  | -0.207941 |
| C | -3.719230 | 1.846395  | 1.092825  |
| C | -2.339794 | -1.804008 | 0.488729  |
| C | -3.580033 | -2.085903 | -0.320056 |
| C | -0.654449 | 1.293490  | -0.741760 |
| C | -0.256526 | 0.633184  | 0.608155  |
| C | 0.007215  | -0.888039 | 0.469618  |
| C | -1.176727 | -1.589640 | -0.132370 |
| O | 0.462952  | 2.091285  | -1.164205 |
| C | 1.427247  | 2.168741  | -0.219366 |
| C | 1.000275  | 1.374099  | 0.970065  |
| O | 2.446723  | 2.783867  | -0.374774 |
| C | 1.731033  | 1.348636  | 2.079438  |
| C | -1.901467 | 2.183711  | -0.670702 |
| C | -2.553749 | -1.557114 | 1.958160  |
| O | -5.407947 | -1.099790 | -1.447478 |
| O | 1.121524  | -1.020911 | -0.422410 |
| C | 2.322834  | -1.350332 | 0.113304  |
| O | 2.468881  | -1.713367 | 1.252786  |
| C | 3.414987  | -1.201960 | -0.918077 |
| C | 4.812997  | -1.091541 | -0.308476 |
| C | 5.855518  | -1.061721 | -1.425511 |
| C | 4.926062  | 0.151020  | 0.576691  |
| H | -4.891343 | -0.557008 | 0.485934  |
| H | -3.014167 | 0.118548  | -1.865693 |
| H | -2.983513 | 1.822652  | 1.907178  |
| H | -4.586798 | 1.258029  | 1.397754  |
| H | -3.316362 | -2.416088 | -1.330736 |
| H | -4.215555 | -2.856086 | 0.131704  |
| H | -4.037071 | 2.891924  | 0.998367  |
| H | -1.046634 | 0.769335  | 1.354645  |
| H | 0.290537  | -1.294417 | 1.445037  |
| H | -1.105701 | -1.769572 | -1.204184 |
| H | 1.459059  | 0.749455  | 2.943291  |
| H | 2.644981  | 1.934712  | 2.125884  |
| H | -1.696433 | 3.008464  | 0.023248  |
| H | -0.792635 | 0.533525  | -1.514206 |
| H | -2.060498 | 2.629731  | -1.658621 |
| H | -3.158366 | -2.358966 | 2.396170  |
| H | -3.103736 | -0.620069 | 2.118949  |
| H | -1.616465 | -1.495820 | 2.517127  |
| H | -5.914152 | -0.292692 | -1.615959 |
| H | 3.347076  | -2.068410 | -1.589946 |
| H | 3.187020  | -0.318846 | -1.527541 |
| H | 4.979473  | -1.979369 | 0.314163  |

|   |          |           |           |
|---|----------|-----------|-----------|
| H | 6.867252 | -1.012461 | -1.011390 |
| H | 5.792310 | -1.950848 | -2.062055 |
| H | 5.712049 | -0.179877 | -2.061264 |
| H | 5.956000 | 0.286060  | 0.922496  |
| H | 4.283222 | 0.061484  | 1.456334  |
| H | 4.630031 | 1.052046  | 0.024962  |

M062X energy = -1154.59051979 a.u.

(2S,6R,7S,8R)-1, Conf. D

|   |           |           |           |
|---|-----------|-----------|-----------|
| C | -4.284837 | -0.510830 | -0.715671 |
| C | -3.276331 | 0.576335  | -0.959205 |
| C | -2.857783 | 1.517396  | -0.105890 |
| C | -3.519819 | 1.862591  | 1.203034  |
| C | -2.359559 | -1.762567 | 0.295795  |
| C | -3.542297 | -1.868160 | -0.633295 |
| C | -0.362520 | 1.339991  | -0.479365 |
| C | -0.091994 | 0.504909  | 0.805272  |
| C | 0.037220  | -1.019404 | 0.553796  |
| C | -1.141940 | -1.547560 | -0.209455 |
| O | 0.803478  | 2.147738  | -0.710807 |
| C | 1.707844  | 2.052219  | 0.289918  |
| C | 1.193568  | 1.097086  | 1.314290  |
| O | 2.747590  | 2.653188  | 0.288924  |
| C | 1.880649  | 0.839826  | 2.422576  |
| C | -1.575052 | 2.276974  | -0.397188 |
| C | -2.680234 | -1.693192 | 1.764792  |
| O | -5.208933 | -0.646856 | -1.782251 |
| O | 1.218566  | -1.238980 | -0.229749 |
| C | 2.292030  | -1.779310 | 0.400981  |
| O | 2.271269  | -2.144470 | 1.549953  |
| C | 3.502590  | -1.818538 | -0.494360 |
| C | 4.070396  | -0.405713 | -0.772897 |
| C | 5.567925  | -0.506563 | -1.062253 |
| C | 3.351771  | 0.279663  | -1.934816 |
| H | -4.817074 | -0.341231 | 0.230863  |
| H | -2.731784 | 0.448666  | -1.898508 |
| H | -3.753548 | 2.934053  | 1.220536  |
| H | -2.846455 | 1.682472  | 2.050820  |
| H | -3.215454 | -2.110483 | -1.650325 |
| H | -4.259729 | -2.634723 | -0.318629 |
| H | -4.446853 | 1.314156  | 1.380850  |
| H | -0.912721 | 0.637005  | 1.520023  |
| H | 0.169973  | -1.518244 | 1.517259  |
| H | -1.000849 | -1.596221 | -1.288556 |
| H | 1.544969  | 0.119281  | 3.161848  |
| H | 2.824680  | 1.350581  | 2.593222  |
| H | -1.378774 | 3.014475  | 0.391188  |
| H | -0.457447 | 0.686787  | -1.351420 |
| H | -1.638123 | 2.830644  | -1.340564 |
| H | -3.237963 | -0.777260 | 2.001042  |
| H | -1.788594 | -1.714342 | 2.395965  |
| H | -3.319667 | -2.534682 | 2.053874  |
| H | -5.652698 | 0.205329  | -1.896419 |
| H | 4.242011  | -2.433480 | 0.024477  |
| H | 3.245909  | -2.304305 | -1.443288 |
| H | 3.934634  | 0.206115  | 0.129664  |

|   |          |           |           |
|---|----------|-----------|-----------|
| H | 5.985227 | 0.480260  | -1.284505 |
| H | 6.114134 | -0.925753 | -0.211356 |
| H | 5.746585 | -1.151648 | -1.931287 |
| H | 3.693547 | 1.313463  | -2.039821 |
| H | 2.269189 | 0.296634  | -1.790984 |
| H | 3.561365 | -0.253425 | -2.870875 |

M062X energy = -1154.58992336 a.u.

(2S,6R,7S,8R)-1, Conf. E

|   |           |           |           |
|---|-----------|-----------|-----------|
| C | -4.405969 | -0.285359 | 0.123806  |
| C | -3.412351 | 0.821843  | 0.415702  |
| C | -2.650050 | 1.478073  | -0.465894 |
| C | -2.807272 | 1.381539  | -1.961176 |
| C | -2.367596 | -1.756476 | 0.300701  |
| C | -3.688628 | -1.564712 | -0.395877 |
| C | -0.163233 | 1.482730  | -0.106230 |
| C | 0.027304  | 0.352959  | 0.948816  |
| C | 0.057337  | -1.071506 | 0.351966  |
| C | -1.246591 | -1.378948 | -0.319739 |
| O | 0.928614  | 2.403558  | 0.065538  |
| C | 1.810465  | 2.004733  | 1.012560  |
| C | 1.321981  | 0.732076  | 1.614038  |
| O | 2.813052  | 2.612777  | 1.267273  |
| C | 2.023629  | 0.096194  | 2.546729  |
| C | -1.467512 | 2.287434  | 0.011802  |
| C | -2.438768 | -2.142507 | 1.753847  |
| O | -5.378866 | 0.031076  | -0.859626 |
| O | 1.101656  | -1.131134 | -0.630702 |
| C | 2.215773  | -1.844404 | -0.332432 |
| O | 2.387422  | -2.403866 | 0.721714  |
| C | 3.200564  | -1.832051 | -1.476140 |
| C | 4.040333  | -0.536661 | -1.546378 |
| C | 3.229591  | 0.661180  | -2.038321 |
| C | 4.715246  | -0.234664 | -0.208652 |
| H | -4.910818 | -0.535679 | 1.069668  |
| H | -3.199997 | 0.977519  | 1.474817  |
| H | -3.666439 | 0.773996  | -2.244864 |
| H | -1.904320 | 0.966061  | -2.426891 |
| H | -3.531257 | -1.424378 | -1.470186 |
| H | -4.365068 | -2.417079 | -0.263926 |
| H | -2.936962 | 2.385041  | -2.384716 |
| H | -0.803975 | 0.376714  | 1.666255  |
| H | 0.295456  | -1.780462 | 1.149462  |
| H | -1.297571 | -1.085576 | -1.368158 |
| H | 1.709490  | -0.853698 | 2.968100  |
| H | 2.961473  | 0.525061  | 2.889889  |
| H | -1.589989 | 2.595428  | 1.056912  |
| H | -0.060248 | 1.072881  | -1.117573 |
| H | -1.341523 | 3.194992  | -0.590212 |
| H | -3.101820 | -3.004289 | 1.887561  |
| H | -2.861061 | -1.323657 | 2.353643  |
| H | -1.463728 | -2.395500 | 2.176564  |
| H | -5.776360 | 0.878475  | -0.613103 |
| H | 3.861868  | -2.687463 | -1.316470 |
| H | 2.657022  | -1.971466 | -2.416225 |
| H | 4.823307  | -0.739638 | -2.288668 |

|   |          |           |           |
|---|----------|-----------|-----------|
| H | 3.870109 | 1.543593  | -2.131171 |
| H | 2.773938 | 0.461604  | -3.014221 |
| H | 2.426871 | 0.911681  | -1.339651 |
| H | 5.416342 | 0.598687  | -0.311750 |
| H | 5.260441 | -1.104836 | 0.171497  |
| H | 3.974294 | 0.053851  | 0.545056  |

M062X energy = -1154.58979928 a.u.

(2S,6R,7S,8R)-1, Conf. F

|   |           |           |           |
|---|-----------|-----------|-----------|
| C | -4.260081 | -0.561609 | -0.570604 |
| C | -3.253203 | 0.491598  | -0.939813 |
| C | -2.819100 | 1.512912  | -0.192905 |
| C | -3.455927 | 1.986578  | 1.088342  |
| C | -2.305013 | -1.727313 | 0.480820  |
| C | -3.523334 | -1.912334 | -0.387441 |
| C | -0.331023 | 1.296832  | -0.612765 |
| C | -0.046916 | 0.554789  | 0.724614  |
| C | 0.104615  | -0.977331 | 0.569708  |
| C | -1.107775 | -1.571182 | -0.089896 |
| O | 0.833330  | 2.086344  | -0.908203 |
| C | 1.719239  | 2.104946  | 0.116472  |
| C | 1.218283  | 1.210611  | 1.199655  |
| O | 2.738351  | 2.738160  | 0.085232  |
| C | 1.897831  | 1.045213  | 2.329815  |
| C | -1.542515 | 2.239562  | -0.579592 |
| C | -2.564681 | -1.500644 | 1.946000  |
| O | -5.215661 | -0.786174 | -1.593753 |
| O | 1.234164  | -1.247450 | -0.273474 |
| C | 2.340188  | -1.781561 | 0.304802  |
| O | 2.447982  | -1.959469 | 1.492243  |
| C | 3.400042  | -2.113487 | -0.717816 |
| C | 4.218707  | -0.885977 | -1.178551 |
| C | 3.437258  | 0.002191  | -2.145383 |
| C | 4.746590  | -0.092666 | 0.016104  |
| H | -4.764148 | -0.303403 | 0.371515  |
| H | -2.727017 | 0.270144  | -1.871928 |
| H | -4.370277 | 1.448580  | 1.345654  |
| H | -3.704185 | 3.051297  | 0.999102  |
| H | -3.235757 | -2.251875 | -1.388384 |
| H | -4.231834 | -2.639607 | 0.024871  |
| H | -2.759463 | 1.905144  | 1.932866  |
| H | -0.872623 | 0.716367  | 1.427377  |
| H | 0.303265  | -1.405807 | 1.556539  |
| H | -1.007761 | -1.727252 | -1.163274 |
| H | 1.573713  | 0.362580  | 3.109317  |
| H | 2.825450  | 1.591848  | 2.478161  |
| H | -1.326489 | 3.037583  | 0.141786  |
| H | -0.433731 | 0.584306  | -1.435851 |
| H | -1.628768 | 2.716192  | -1.562338 |
| H | -3.233173 | -2.273462 | 2.340974  |
| H | -3.064829 | -0.535873 | 2.106569  |
| H | -1.649252 | -1.505931 | 2.543048  |
| H | -5.651836 | 0.057481  | -1.778260 |
| H | 4.064086  | -2.835363 | -0.235693 |
| H | 2.924578  | -2.588569 | -1.582119 |
| H | 5.078706  | -1.299027 | -1.721901 |

|   |          |           |           |
|---|----------|-----------|-----------|
| H | 4.038948 | 0.865707  | -2.444785 |
| H | 3.156509 | -0.551935 | -3.047675 |
| H | 2.519170 | 0.382296  | -1.690126 |
| H | 5.438010 | 0.687090  | -0.316089 |
| H | 5.266070 | -0.741817 | 0.728924  |
| H | 3.928212 | 0.405249  | 0.545960  |

M062X energy = -1154.58978425 a.u.

(2S,6R,7S,8R)-1, Conf. G

|   |           |           |           |
|---|-----------|-----------|-----------|
| C | -4.313614 | -0.567348 | -0.642107 |
| C | -3.277076 | 0.446158  | -1.046561 |
| C | -2.853063 | 1.512836  | -0.361600 |
| C | -3.533570 | 2.087208  | 0.853248  |
| C | -2.397958 | -1.705527 | 0.523095  |
| C | -3.594129 | -1.920964 | -0.368236 |
| C | -0.365229 | 1.210676  | -0.678273 |
| C | -0.149989 | 0.561940  | 0.718162  |
| C | 0.015809  | -0.974667 | 0.645020  |
| C | -1.178995 | -1.606486 | -0.013970 |
| O | 0.838651  | 1.928283  | -0.994043 |
| C | 1.670383  | 2.028822  | 0.069586  |
| C | 1.096417  | 1.246107  | 1.203013  |
| O | 2.698900  | 2.646941  | 0.036878  |
| C | 1.705783  | 1.184473  | 2.382445  |
| C | -1.547048 | 2.187432  | -0.748605 |
| C | -2.701167 | -1.378321 | 1.960459  |
| O | -5.345482 | -0.742195 | -1.594812 |
| O | 1.162322  | -1.246357 | -0.170104 |
| C | 2.282349  | -1.717520 | 0.437020  |
| O | 2.360118  | -1.933763 | 1.619313  |
| C | 3.385546  | -1.882212 | -0.575300 |
| C | 3.963799  | -0.518546 | -1.002117 |
| C | 4.656305  | 0.170555  | 0.172696  |
| C | 4.932737  | -0.709910 | -2.167374 |
| H | -4.826570 | -0.250375 | 0.269719  |
| H | -2.703320 | 0.152941  | -1.932182 |
| H | -2.875446 | 2.056100  | 1.731420  |
| H | -4.470127 | 1.585497  | 1.102815  |
| H | -3.269819 | -2.325362 | -1.336440 |
| H | -4.324448 | -2.617851 | 0.057875  |
| H | -3.758743 | 3.145585  | 0.675174  |
| H | -1.007069 | 0.766419  | 1.369625  |
| H | 0.204175  | -1.362449 | 1.650976  |
| H | -1.043095 | -1.837416 | -1.069779 |
| H | 1.322746  | 0.587356  | 3.204614  |
| H | 2.630488  | 1.734989  | 2.534339  |
| H | -1.336197 | 3.023976  | -0.070663 |
| H | -0.472075 | 0.442203  | -1.447763 |
| H | -1.588821 | 2.603567  | -1.761337 |
| H | -3.397572 | -2.111603 | 2.381566  |
| H | -3.186469 | -0.396197 | 2.041471  |
| H | -1.805559 | -1.362322 | 2.586687  |
| H | -4.930028 | -0.954265 | -2.443732 |
| H | 4.167742  | -2.498104 | -0.121409 |
| H | 2.980750  | -2.403610 | -1.449239 |
| H | 3.129396  | 0.109124  | -1.342877 |

|   |          |           |           |
|---|----------|-----------|-----------|
| H | 5.015337 | 1.160992  | -0.118723 |
| H | 3.978982 | 0.301779  | 1.022106  |
| H | 5.510930 | -0.428793 | 0.509600  |
| H | 5.344204 | 0.251832  | -2.488147 |
| H | 4.440075 | -1.174111 | -3.027901 |
| H | 5.770722 | -1.351410 | -1.869239 |

M062X energy = -1154.58971854 a.u.

(2S,6R,7S,8R)-1, Conf. H

|   |           |           |           |
|---|-----------|-----------|-----------|
| C | -4.388159 | -0.888824 | -0.370292 |
| C | -3.543205 | 0.280447  | -0.793824 |
| C | -3.151095 | 1.327524  | -0.059029 |
| C | -3.709768 | 1.702345  | 1.289113  |
| C | -2.223350 | -1.861072 | 0.441016  |
| C | -3.493326 | -2.153600 | -0.316876 |
| C | -0.719648 | 1.357753  | -0.716727 |
| C | -0.226887 | 0.647811  | 0.575456  |
| C | 0.084126  | -0.853243 | 0.345283  |
| C | -1.104785 | -1.569417 | -0.228505 |
| O | 0.341209  | 2.224395  | -1.149968 |
| C | 1.348474  | 2.295394  | -0.251244 |
| C | 1.018551  | 1.420467  | 0.911946  |
| O | 2.331842  | 2.963172  | -0.424086 |
| C | 1.809631  | 1.364051  | 1.978089  |
| C | -1.995679 | 2.190372  | -0.541089 |
| C | -2.368522 | -1.692765 | 1.929613  |
| O | -5.412642 | -1.189314 | -1.303247 |
| O | 1.151296  | -0.900406 | -0.610638 |
| C | 2.395685  | -1.189061 | -0.152691 |
| O | 2.613386  | -1.576747 | 0.967807  |
| C | 3.413327  | -0.951331 | -1.244540 |
| C | 4.850540  | -0.746553 | -0.749562 |
| C | 4.936086  | 0.400382  | 0.260794  |
| C | 5.466624  | -2.030755 | -0.191775 |
| H | -4.819182 | -0.717409 | 0.626257  |
| H | -3.088520 | 0.138455  | -1.777514 |
| H | -4.066998 | 2.738923  | 1.259592  |
| H | -2.934857 | 1.668116  | 2.065878  |
| H | -3.270544 | -2.424362 | -1.354615 |
| H | -4.074353 | -2.969443 | 0.128034  |
| H | -4.541054 | 1.069712  | 1.606192  |
| H | -0.981547 | 0.713794  | 1.366793  |
| H | 0.435003  | -1.295370 | 1.282265  |
| H | -1.084793 | -1.696113 | -1.309995 |
| H | 1.607009  | 0.707460  | 2.818999  |
| H | 2.703614  | 1.981028  | 2.010216  |
| H | -1.787431 | 2.989852  | 0.180998  |
| H | -0.862996 | 0.631571  | -1.520371 |
| H | -2.221381 | 2.675423  | -1.497270 |
| H | -2.918410 | -2.538023 | 2.357987  |
| H | -2.944320 | -0.787188 | 2.164367  |
| H | -1.406080 | -1.620066 | 2.442668  |
| H | -5.953237 | -0.394219 | -1.411227 |
| H | 3.356726  | -1.807047 | -1.931035 |
| H | 3.075654  | -0.077166 | -1.812076 |
| H | 5.424567  | -0.455650 | -1.639143 |



|   |          |           |           |
|---|----------|-----------|-----------|
| H | 5.981094 | 0.665642  | 0.449787  |
| H | 4.414178 | 1.295473  | -0.098393 |
| H | 4.487863 | 0.099107  | 1.212788  |
| H | 6.513516 | -1.862929 | 0.081351  |
| H | 5.437695 | -2.838348 | -0.931696 |
| H | 4.926327 | -2.359570 | 0.699278  |

M062X energy = -1154.58965996 a.u.

(2S,6R,7S,8R)-1, Conf. I

|   |           |           |           |
|---|-----------|-----------|-----------|
| C | -4.505450 | -0.560702 | 0.101131  |
| C | -3.625271 | 0.669961  | 0.199992  |
| C | -2.917253 | 1.239195  | -0.781617 |
| C | -3.048622 | 0.881148  | -2.239020 |
| C | -2.347072 | -1.788141 | 0.525948  |
| C | -3.663053 | -1.832246 | -0.204524 |
| C | -0.448444 | 1.517085  | -0.420043 |
| C | -0.184931 | 0.624123  | 0.826903  |
| C | -0.001392 | -0.872644 | 0.492764  |
| C | -1.248986 | -1.413884 | -0.136570 |
| O | 0.567043  | 2.534110  | -0.430364 |
| C | 1.458951  | 2.397179  | 0.577024  |
| C | 1.051535  | 1.238691  | 1.422833  |
| O | 2.408381  | 3.118519  | 0.711055  |
| C | 1.766568  | 0.872167  | 2.481376  |
| C | -1.815859 | 2.219294  | -0.449070 |
| C | -2.418126 | -1.941707 | 2.021744  |
| O | -5.494357 | -0.507849 | -0.914852 |
| O | 1.079904  | -0.981000 | -0.444608 |
| C | 2.240562  | -1.526788 | -0.014114 |
| O | 2.418654  | -1.927855 | 1.108949  |
| C | 3.273890  | -1.569855 | -1.114142 |
| C | 4.625750  | -1.027105 | -0.632660 |
| C | 5.687645  | -1.233926 | -1.710859 |
| C | 4.508457  | 0.448749  | -0.253107 |
| H | -4.992122 | -0.699744 | 1.078746  |
| H | -3.440213 | 1.018090  | 1.217706  |
| H | -3.839625 | 0.151606  | -2.412410 |
| H | -2.103658 | 0.487569  | -2.635019 |
| H | -3.493515 | -1.847128 | -1.285954 |
| H | -4.262193 | -2.712603 | 0.054993  |
| H | -3.274490 | 1.782451  | -2.821999 |
| H | -1.034234 | 0.693143  | 1.518895  |
| H | 0.276648  | -1.408260 | 1.404038  |
| H | -1.300932 | -1.298393 | -1.219111 |
| H | 1.510419  | 0.010842  | 3.090556  |
| H | 2.655006  | 1.440738  | 2.743356  |
| H | -1.983036 | 2.693640  | 0.525110  |
| H | -0.303888 | 0.936305  | -1.337231 |
| H | -1.754291 | 3.014390  | -1.201291 |
| H | -1.435591 | -2.051999 | 2.486069  |
| H | -2.909695 | -1.072271 | 2.480904  |
| H | -3.018564 | -2.818540 | 2.287272  |
| H | -5.980851 | 0.321680  | -0.805033 |
| H | 3.376818  | -2.619798 | -1.416028 |
| H | 2.913210  | -1.005761 | -1.979891 |
| H | 4.903753  | -1.599441 | 0.260599  |

|   |          |           |           |
|---|----------|-----------|-----------|
| H | 6.661104 | -0.866509 | -1.371958 |
| H | 5.795692 | -2.291694 | -1.972671 |
| H | 5.422887 | -0.684590 | -2.622108 |
| H | 5.469069 | 0.842062  | 0.093332  |
| H | 3.779209 | 0.603560  | 0.548270  |
| H | 4.192711 | 1.049688  | -1.114512 |

M062X energy = -1154.58957113 a.u.

(2S,6R,7S,8R)-1, Conf. J

|   |           |           |           |
|---|-----------|-----------|-----------|
| C | -4.314485 | -0.553786 | -0.657854 |
| C | -3.281159 | 0.456313  | -1.058624 |
| C | -2.849980 | 1.510154  | -0.358925 |
| C | -3.519298 | 2.077261  | 0.866053  |
| C | -2.402958 | -1.689204 | 0.536783  |
| C | -3.593000 | -1.903511 | -0.362081 |
| C | -0.362327 | 1.213641  | -0.675985 |
| C | -0.144217 | 0.570129  | 0.722720  |
| C | 0.014414  | -0.967155 | 0.655248  |
| C | -1.184284 | -1.593742 | -0.001149 |
| O | 0.840815  | 1.931990  | -0.995294 |
| C | 1.676796  | 2.031749  | 0.064210  |
| C | 1.106429  | 1.250940  | 1.200931  |
| O | 2.706671  | 2.647712  | 0.027576  |
| C | 1.721477  | 1.188398  | 2.377333  |
| C | -1.546183 | 2.187138  | -0.749598 |
| C | -2.707853 | -1.364772 | 1.974083  |
| O | -5.225179 | -0.716698 | -1.730636 |
| O | 1.157646  | -1.247334 | -0.161428 |
| C | 2.277264  | -1.721268 | 0.443613  |
| O | 2.357474  | -1.935704 | 1.626186  |
| C | 3.376579  | -1.892380 | -0.571972 |
| C | 3.954779  | -0.531607 | -1.008165 |
| C | 4.655502  | 0.161181  | 0.159574  |
| C | 4.916224  | -0.729459 | -2.178489 |
| H | -4.844206 | -0.226450 | 0.247572  |
| H | -2.733304 | 0.172130  | -1.960009 |
| H | -4.455206 | 1.576452  | 1.120044  |
| H | -3.742500 | 3.137612  | 0.697088  |
| H | -3.273669 | -2.305424 | -1.330092 |
| H | -4.317996 | -2.604567 | 0.074872  |
| H | -2.855662 | 2.038477  | 1.739779  |
| H | -0.997999 | 0.780810  | 1.376407  |
| H | 0.202422  | -1.353255 | 1.661950  |
| H | -1.052267 | -1.823548 | -1.057463 |
| H | 1.341494  | 0.592400  | 3.201739  |
| H | 2.648285  | 1.736781  | 2.524060  |
| H | -1.336617 | 3.027705  | -0.076143 |
| H | -0.469187 | 0.442593  | -1.442780 |
| H | -1.590433 | 2.596732  | -1.764721 |
| H | -3.393053 | -2.107473 | 2.397871  |
| H | -3.206428 | -0.389486 | 2.054997  |
| H | -1.811445 | -1.336606 | 2.598772  |
| H | -5.829166 | -1.437422 | -1.500430 |
| H | 4.159719  | -2.507191 | -0.118238 |
| H | 2.967351  | -2.417456 | -1.441651 |
| H | 3.119382  | 0.095966  | -1.346589 |

|   |          |           |           |
|---|----------|-----------|-----------|
| H | 5.013783 | 1.150093  | -0.137840 |
| H | 3.983703 | 0.296301  | 1.012764  |
| H | 5.511597 | -0.437890 | 0.493313  |
| H | 5.327697 | 0.230221  | -2.505365 |
| H | 4.417270 | -1.195706 | -3.034248 |
| H | 5.754693 | -1.371641 | -1.883119 |

M062X energy = -1154.58951636 a.u.

(2S,6R,7S,8R)-1, Conf. K

|   |           |           |           |
|---|-----------|-----------|-----------|
| C | -4.249720 | -1.247923 | -0.511647 |
| C | -3.506391 | -0.022074 | -0.963861 |
| C | -3.294273 | 1.113604  | -0.289381 |
| C | -3.999351 | 1.518698  | 0.979145  |
| C | -2.068390 | -1.894600 | 0.543639  |
| C | -3.228312 | -2.390825 | -0.281566 |
| C | -0.831622 | 1.391832  | -0.763355 |
| C | -0.376495 | 0.833937  | 0.615498  |
| C | 0.113148  | -0.633460 | 0.540631  |
| C | -0.936238 | -1.523975 | -0.060700 |
| O | 0.148898  | 2.358947  | -1.169395 |
| C | 1.058127  | 2.612118  | -0.201017 |
| C | 0.743433  | 1.765117  | 0.987394  |
| O | 1.958664  | 3.393587  | -0.338265 |
| C | 1.457594  | 1.850209  | 2.104615  |
| C | -2.208051 | 2.069571  | -0.754917 |
| C | -2.357470 | -1.634878 | 1.997889  |
| O | -5.148544 | -1.734308 | -1.494472 |
| O | 1.263772  | -0.642021 | -0.316067 |
| C | 2.480025  | -0.786463 | 0.263703  |
| O | 2.639688  | -1.051330 | 1.428594  |
| C | 3.575471  | -0.523663 | -0.740096 |
| C | 4.958477  | -0.954337 | -0.253910 |
| C | 5.044856  | -2.474830 | -0.121640 |
| C | 6.032682  | -0.427881 | -1.204624 |
| H | -4.783263 | -1.054610 | 0.429834  |
| H | -2.957922 | -0.179957 | -1.896163 |
| H | -4.471728 | 2.498060  | 0.835648  |
| H | -3.289646 | 1.640131  | 1.807665  |
| H | -2.888291 | -2.713182 | -1.271648 |
| H | -3.751385 | -3.232722 | 0.186209  |
| H | -4.773193 | 0.814993  | 1.291571  |
| H | -1.202214 | 0.867391  | 1.334890  |
| H | 0.421098  | -0.957246 | 1.538948  |
| H | -0.809683 | -1.726363 | -1.123309 |
| H | 1.268196  | 1.216078  | 2.965398  |
| H | 2.273101  | 2.565868  | 2.162432  |
| H | -2.154393 | 2.941160  | -0.090509 |
| H | -0.811662 | 0.604776  | -1.521798 |
| H | -2.406705 | 2.450504  | -1.762881 |
| H | -1.457193 | -1.409130 | 2.575028  |
| H | -2.842512 | -2.505558 | 2.452675  |
| H | -3.050185 | -0.789901 | 2.111365  |
| H | -5.768053 | -1.021434 | -1.704535 |
| H | 3.312201  | -1.015078 | -1.684815 |
| H | 3.548524  | 0.557322  | -0.940075 |
| H | 5.109491  | -0.512168 | 0.738179  |

|   |          |           |           |
|---|----------|-----------|-----------|
| H | 6.032646 | -2.777337 | 0.239927  |
| H | 4.296648 | -2.854668 | 0.579083  |
| H | 4.885608 | -2.952917 | -1.096170 |
| H | 7.031402 | -0.713206 | -0.860002 |
| H | 5.998871 | 0.663431  | -1.285091 |
| H | 5.895419 | -0.844294 | -2.209829 |

M062X energy = -1154.58951310 a.u.

(2S,6R,7S,8R)-1, Conf. L

|   |           |           |           |
|---|-----------|-----------|-----------|
| C | -4.329526 | -0.804195 | -0.455451 |
| C | -3.437053 | 0.333446  | -0.866827 |
| C | -3.037729 | 1.374665  | -0.128173 |
| C | -3.628871 | 1.777293  | 1.198420  |
| C | -2.227472 | -1.815246 | 0.463576  |
| C | -3.473269 | -2.090576 | -0.339144 |
| C | -0.565307 | 1.375975  | -0.693032 |
| C | -0.145642 | 0.646392  | 0.614503  |
| C | 0.113398  | -0.866216 | 0.431272  |
| C | -1.082169 | -1.549943 | -0.169882 |
| O | 0.505565  | 2.269403  | -1.037242 |
| C | 1.434853  | 2.362580  | -0.057098 |
| C | 1.093457  | 1.390708  | 1.023093  |
| O | 2.370849  | 3.111201  | -0.113693 |
| C | 1.873434  | 1.241964  | 2.089119  |
| C | -1.850869 | 2.208767  | -0.579147 |
| C | -2.422470 | -1.631514 | 1.944487  |
| O | -5.323583 | -1.097270 | -1.422870 |
| O | 1.212667  | -1.032230 | -0.475654 |
| C | 2.358157  | -1.569415 | 0.010732  |
| O | 2.535636  | -1.811015 | 1.179605  |
| C | 3.358513  | -1.816929 | -1.093334 |
| C | 4.596561  | -0.902966 | -0.987939 |
| C | 4.183931  | 0.566941  | -0.943174 |
| C | 5.476499  | -1.262607 | 0.208785  |
| H | -4.794855 | -0.601034 | 0.519532  |
| H | -2.955151 | 0.168486  | -1.834027 |
| H | -4.488460 | 1.172707  | 1.493638  |
| H | -3.953757 | 2.823749  | 1.149031  |
| H | -3.216647 | -2.390499 | -1.360925 |
| H | -4.093942 | -2.880592 | 0.098683  |
| H | -2.881093 | 1.727050  | 2.000418  |
| H | -0.936735 | 0.739573  | 1.367844  |
| H | 0.399336  | -1.288175 | 1.399235  |
| H | -1.031865 | -1.682245 | -1.249920 |
| H | 1.673605  | 0.506362  | 2.862235  |
| H | 2.759764  | 1.863862  | 2.186614  |
| H | -1.661744 | 3.017772  | 0.137586  |
| H | -0.650657 | 0.665944  | -1.520067 |
| H | -2.033772 | 2.683034  | -1.549705 |
| H | -2.998969 | -2.464844 | 2.361136  |
| H | -2.993572 | -0.715813 | 2.149740  |
| H | -1.477984 | -1.566362 | 2.490859  |
| H | -5.841627 | -0.292443 | -1.563950 |
| H | 3.666416  | -2.865683 | -1.017055 |
| H | 2.863236  | -1.667072 | -2.055629 |
| H | 5.173374  | -1.079081 | -1.905150 |

|   |          |           |           |
|---|----------|-----------|-----------|
| H | 5.053830 | 1.225376  | -1.023961 |
| H | 3.488348 | 0.824072  | -1.749706 |
| H | 3.691708 | 0.796302  | 0.008251  |
| H | 6.366677 | -0.625827 | 0.230134  |
| H | 5.804658 | -2.306375 | 0.163073  |
| H | 4.930256 | -1.123724 | 1.146210  |

M062X energy = -1154.58919227 a.u.

(2S,6R,7S,8R)-1, Conf. M

|   |           |           |           |
|---|-----------|-----------|-----------|
| C | -4.427470 | -0.772210 | -0.471897 |
| C | -3.507256 | 0.336041  | -0.908066 |
| C | -3.104921 | 1.402400  | -0.209235 |
| C | -3.718557 | 1.869600  | 1.084350  |
| C | -2.343774 | -1.806603 | 0.476269  |
| C | -3.588225 | -2.076349 | -0.329929 |
| C | -0.648145 | 1.287030  | -0.743213 |
| C | -0.256574 | 0.622856  | 0.606368  |
| C | 0.005790  | -0.898403 | 0.463430  |
| C | -1.178012 | -1.597670 | -0.141863 |
| O | 0.477491  | 2.073103  | -1.165849 |
| C | 1.439832  | 2.144665  | -0.218568 |
| C | 1.001254  | 1.359547  | 0.972963  |
| O | 2.466334  | 2.748176  | -0.373985 |
| C | 1.723802  | 1.337931  | 2.087765  |
| C | -1.887089 | 2.187647  | -0.670616 |
| C | -2.559803 | -1.553998 | 1.944575  |
| O | -5.522602 | -0.983259 | -1.342901 |
| O | 1.120652  | -1.028805 | -0.428080 |
| C | 2.322143  | -1.358792 | 0.108382  |
| O | 2.465458  | -1.731588 | 1.244876  |
| C | 3.416672  | -1.196940 | -0.918365 |
| C | 4.812048  | -1.078927 | -0.303774 |
| C | 5.856250  | -1.027222 | -1.418609 |
| C | 4.910950  | 0.155804  | 0.594066  |
| H | -4.880703 | -0.539514 | 0.495460  |
| H | -2.994107 | 0.127131  | -1.852916 |
| H | -4.590810 | 1.286063  | 1.384462  |
| H | -4.035843 | 2.914077  | 0.979012  |
| H | -3.315816 | -2.408269 | -1.340744 |
| H | -4.226674 | -2.847468 | 0.115648  |
| H | -2.987462 | 1.851324  | 1.903238  |
| H | -1.048842 | 0.759497  | 1.350406  |
| H | 0.287751  | -1.308405 | 1.437790  |
| H | -1.102890 | -1.779195 | -1.213295 |
| H | 1.442492  | 0.746108  | 2.953714  |
| H | 2.640052  | 1.920122  | 2.137302  |
| H | -1.675228 | 3.008693  | 0.025568  |
| H | -0.792439 | 0.528240  | -1.515793 |
| H | -2.042869 | 2.638450  | -1.656899 |
| H | -3.090890 | -0.605460 | 2.101545  |
| H | -1.623504 | -1.510472 | 2.506670  |
| H | -3.181989 | -2.342841 | 2.381388  |
| H | -5.168555 | -1.117906 | -2.234520 |
| H | 3.357908  | -2.060436 | -1.594903 |
| H | 3.184374  | -0.312269 | -1.523870 |
| H | 4.986267  | -1.971487 | 0.309885  |

|   |          |           |           |
|---|----------|-----------|-----------|
| H | 6.866769 | -0.973540 | -1.002134 |
| H | 5.802092 | -1.909600 | -2.065320 |
| H | 5.705658 | -0.139433 | -2.044317 |
| H | 5.939899 | 0.300252  | 0.939032  |
| H | 4.271531 | 0.048106  | 1.474196  |
| H | 4.601671 | 1.058769  | 0.052683  |

M062X energy = -1154.58875155 a.u.

(2S,6R,7S,8R)-1, Conf. N

|   |           |           |           |
|---|-----------|-----------|-----------|
| C | -4.317746 | -1.216131 | 0.181424  |
| C | -3.728308 | 0.180052  | 0.150286  |
| C | -3.147004 | 0.790356  | -0.887891 |
| C | -3.170641 | 0.269596  | -2.301236 |
| C | -1.952420 | -1.884846 | 0.732668  |
| C | -3.210476 | -2.295623 | 0.014017  |
| C | -0.803720 | 1.656801  | -0.581056 |
| C | -0.346804 | 0.985620  | 0.747570  |
| C | 0.131887  | -0.474474 | 0.592026  |
| C | -0.960113 | -1.330856 | 0.030387  |
| O | -0.062009 | 2.881581  | -0.709298 |
| C | 0.846320  | 3.052397  | 0.278001  |
| C | 0.751691  | 1.899820  | 1.220043  |
| O | 1.585257  | 3.995990  | 0.328521  |
| C | 1.595024  | 1.778335  | 2.240162  |
| C | -2.296365 | 2.018162  | -0.663563 |
| C | -2.014406 | -1.911520 | 2.236310  |
| O | -5.268952 | -1.486129 | -0.836187 |
| O | 1.242482  | -0.470398 | -0.317178 |
| C | 2.467789  | -0.745234 | 0.184875  |
| O | 2.668913  | -1.064202 | 1.330433  |
| C | 3.528363  | -0.560381 | -0.873362 |
| C | 4.871639  | -1.184130 | -0.497694 |
| C | 4.770317  | -2.708423 | -0.440385 |
| C | 5.947321  | -0.746434 | -1.490517 |
| H | -4.787356 | -1.356517 | 1.167147  |
| H | -3.637118 | 0.658140  | 1.127136  |
| H | -3.583451 | 1.033978  | -2.970940 |
| H | -3.773214 | -0.633595 | -2.395796 |
| H | -3.018186 | -2.387190 | -1.059880 |
| H | -3.606326 | -3.254288 | 0.368318  |
| H | -2.154416 | 0.062990  | -2.661044 |
| H | -1.183516 | 0.972785  | 1.458931  |
| H | 0.483789  | -0.834871 | 1.561453  |
| H | -1.023882 | -1.330504 | -1.057684 |
| H | 1.579045  | 0.929696  | 2.916910  |
| H | 2.346598  | 2.547205  | 2.396909  |
| H | -2.577033 | 2.536224  | 0.261007  |
| H | -0.516084 | 1.034238  | -1.435308 |
| H | -2.407829 | 2.729975  | -1.489927 |
| H | -2.707213 | -1.144079 | 2.609626  |
| H | -1.043786 | -1.741817 | 2.707380  |
| H | -2.396818 | -2.876633 | 2.585630  |
| H | -5.925125 | -0.774835 | -0.817216 |
| H | 3.151815  | -0.963507 | -1.821228 |
| H | 3.626775  | 0.524343  | -1.020370 |
| H | 5.136409  | -0.818413 | 0.501679  |

|   |          |           |           |
|---|----------|-----------|-----------|
| H | 5.730593 | -3.150094 | -0.156203 |
| H | 4.021331 | -3.028291 | 0.289078  |
| H | 4.494903 | -3.111427 | -1.423008 |
| H | 6.918680 | -1.175684 | -1.226044 |
| H | 6.053322 | 0.343017  | -1.515432 |
| H | 5.698472 | -1.084092 | -2.503825 |

M062X energy = -1154.58873823 a.u.

(2S,6R,7S,8R)-1, Conf. O

|   |           |           |           |
|---|-----------|-----------|-----------|
| C | -4.166199 | -1.013036 | -0.378502 |
| C | -3.357202 | 0.148863  | -0.885777 |
| C | -3.060517 | 1.289816  | -0.252956 |
| C | -3.707480 | 1.771674  | 1.019877  |
| C | -2.002524 | -1.780087 | 0.637424  |
| C | -3.219319 | -2.216977 | -0.137864 |
| C | -0.600251 | 1.391273  | -0.783256 |
| C | -0.176528 | 0.819468  | 0.597284  |
| C | 0.259764  | -0.657903 | 0.510210  |
| C | -0.867845 | -1.508768 | -0.012142 |
| O | 0.450972  | 2.274807  | -1.202864 |
| C | 1.347182  | 2.514377  | -0.217231 |
| C | 0.954752  | 1.723824  | 0.988384  |
| O | 2.281488  | 3.255397  | -0.347359 |
| C | 1.581513  | 1.867219  | 2.151020  |
| C | -1.926666 | 2.163351  | -0.766612 |
| C | -2.222046 | -1.463998 | 2.092276  |
| O | -5.120699 | -1.465053 | -1.324642 |
| O | 1.353798  | -0.681024 | -0.415588 |
| C | 2.235872  | -1.701168 | -0.278660 |
| O | 2.137193  | -2.537358 | 0.584092  |
| C | 3.342916  | -1.617589 | -1.299108 |
| C | 4.592545  | -0.902762 | -0.738279 |
| C | 4.281627  | 0.537686  | -0.333978 |
| C | 5.213971  | -1.681680 | 0.420670  |
| H | -4.661644 | -0.757320 | 0.568856  |
| H | -2.843336 | -0.071286 | -1.825095 |
| H | -4.510817 | 1.122074  | 1.372394  |
| H | -4.128138 | 2.771748  | 0.859009  |
| H | -2.931667 | -2.593252 | -1.125635 |
| H | -3.785748 | -3.005670 | 0.370279  |
| H | -2.969802 | 1.876374  | 1.826132  |
| H | -1.006865 | 0.866830  | 1.308894  |
| H | 0.620400  | -0.993115 | 1.488482  |
| H | -0.796009 | -1.750677 | -1.072127 |
| H | 1.301189  | 1.302226  | 3.035541  |
| H | 2.408017  | 2.568451  | 2.228302  |
| H | -1.802231 | 3.043605  | -0.123409 |
| H | -0.646352 | 0.595205  | -1.530637 |
| H | -2.122034 | 2.534033  | -1.778930 |
| H | -2.874007 | -0.587042 | 2.207635  |
| H | -1.289312 | -1.264056 | 2.625943  |
| H | -2.724625 | -2.299480 | 2.591828  |
| H | -5.699175 | -0.719172 | -1.537353 |
| H | 3.600778  | -2.643255 | -1.578589 |
| H | 2.976611  | -1.084451 | -2.180673 |
| H | 5.314634  | -0.880437 | -1.564689 |

|   |          |           |           |
|---|----------|-----------|-----------|
| H | 5.198114 | 1.065275  | -0.052359 |
| H | 3.805557 | 1.097571  | -1.144780 |
| H | 3.606022 | 0.566210  | 0.529134  |
| H | 6.132456 | -1.191851 | 0.759133  |
| H | 5.460320 | -2.707384 | 0.127967  |
| H | 4.524270 | -1.736817 | 1.268971  |

M062X energy = -1154.58873170 a.u.

(2S,6R,7S,8R)-1, Conf. P

|   |           |           |           |
|---|-----------|-----------|-----------|
| C | -4.429338 | -0.770738 | -0.483387 |
| C | -3.517177 | 0.338173  | -0.916042 |
| C | -3.110052 | 1.393326  | -0.203611 |
| C | -3.713233 | 1.850648  | 1.098909  |
| C | -2.341444 | -1.797062 | 0.487028  |
| C | -3.580823 | -2.068724 | -0.325366 |
| C | -0.653668 | 1.294507  | -0.742106 |
| C | -0.254109 | 0.634559  | 0.607497  |
| C | 0.007534  | -0.886893 | 0.469526  |
| C | -1.177433 | -1.585790 | -0.133193 |
| O | 0.466235  | 2.087890  | -1.167879 |
| C | 1.432772  | 2.162751  | -0.226005 |
| C | 1.004998  | 1.372819  | 0.966499  |
| O | 2.455564  | 2.771821  | -0.384750 |
| C | 1.736335  | 1.348822  | 2.075480  |
| C | -1.898480 | 2.186442  | -0.668278 |
| C | -2.558030 | -1.550082 | 1.955875  |
| O | -5.418335 | -0.955161 | -1.480347 |
| O | 1.121247  | -1.022577 | -0.422468 |
| C | 2.322047  | -1.354098 | 0.113443  |
| O | 2.466376  | -1.721494 | 1.251739  |
| C | 3.415073  | -1.202145 | -0.916385 |
| C | 4.812918  | -1.095917 | -0.305695 |
| C | 5.855514  | -1.060292 | -1.422534 |
| C | 4.926293  | 0.141768  | 0.586298  |
| H | -4.897728 | -0.532876 | 0.482015  |
| H | -3.032367 | 0.140106  | -1.874851 |
| H | -2.978109 | 1.823438  | 1.913938  |
| H | -4.585244 | 1.267247  | 1.400265  |
| H | -3.314205 | -2.394796 | -1.336900 |
| H | -4.207781 | -2.848481 | 0.129825  |
| H | -4.027846 | 2.897009  | 1.004380  |
| H | -1.042707 | 0.772856  | 1.355088  |
| H | 0.289660  | -1.294333 | 1.444896  |
| H | -1.106412 | -1.764331 | -1.205200 |
| H | 1.463152  | 0.753228  | 2.941452  |
| H | 2.651727  | 1.932795  | 2.119755  |
| H | -1.690518 | 3.010421  | 0.025736  |
| H | -0.795608 | 0.534598  | -1.513933 |
| H | -2.059719 | 2.633029  | -1.655468 |
| H | -3.162684 | -2.351908 | 2.394405  |
| H | -3.107456 | -0.612613 | 2.115188  |
| H | -1.621245 | -1.489142 | 2.515546  |
| H | -5.937386 | -1.737646 | -1.244079 |
| H | 3.346594  | -2.065210 | -1.592560 |
| H | 3.188371  | -0.315847 | -1.521686 |
| H | 4.979001  | -1.987329 | 0.311942  |

|   |          |           |           |
|---|----------|-----------|-----------|
| H | 6.867292 | -1.014679 | -1.008102 |
| H | 5.791367 | -1.945372 | -2.064633 |
| H | 5.712915 | -0.174349 | -2.052728 |
| H | 5.956801 | 0.276082  | 0.930695  |
| H | 4.285388 | 0.046339  | 1.466736  |
| H | 4.627864 | 1.045471  | 0.040199  |

M062X energy = -1154.58853793 a.u.

(2S,6R,7S,8R)-1, Conf. Q

|   |           |           |           |
|---|-----------|-----------|-----------|
| C | -3.957686 | -1.350611 | -0.442805 |
| C | -3.164840 | -0.261789 | -1.111096 |
| C | -3.043116 | 1.018355  | -0.741239 |
| C | -3.908369 | 1.716071  | 0.276155  |
| C | -1.931690 | -1.615538 | 1.011753  |
| C | -2.972620 | -2.354177 | 0.209592  |
| C | -0.540082 | 1.248208  | -0.964328 |
| C | -0.258872 | 1.097876  | 0.557806  |
| C | 0.229312  | -0.319842 | 0.943302  |
| C | -0.732882 | -1.373185 | 0.474760  |
| O | 0.484453  | 2.100112  | -1.499140 |
| C | 1.270388  | 2.632390  | -0.535030 |
| C | 0.814028  | 2.124421  | 0.792585  |
| O | 2.180973  | 3.377128  | -0.771969 |
| C | 1.395627  | 2.520522  | 1.919742  |
| C | -1.906829 | 1.856791  | -1.304184 |
| C | -2.407575 | -1.000727 | 2.300284  |
| O | -4.721900 | -2.112271 | -1.362779 |
| O | 1.481881  | -0.517761 | 0.274512  |
| C | 2.608062  | -0.511462 | 1.031159  |
| O | 2.602719  | -0.456920 | 2.234187  |
| C | 3.838181  | -0.543427 | 0.158278  |
| C | 3.778080  | -1.562455 | -0.987375 |
| C | 5.066910  | -1.496049 | -1.804961 |
| C | 3.542327  | -2.973884 | -0.450046 |
| H | -4.608137 | -0.933684 | 0.339166  |
| H | -2.499821 | -0.639323 | -1.892113 |
| H | -3.315997 | 2.065737  | 1.131474  |
| H | -4.351009 | 2.612160  | -0.175660 |
| H | -2.505289 | -2.913051 | -0.608546 |
| H | -3.551072 | -3.061559 | 0.814681  |
| H | -4.721919 | 1.094212  | 0.654529  |
| H | -1.165217 | 1.303417  | 1.138098  |
| H | 0.404295  | -0.356866 | 2.022320  |
| H | -0.472557 | -1.840516 | -0.474220 |
| H | 1.108024  | 2.131268  | 2.891718  |
| H | 2.203250  | 3.246047  | 1.874005  |
| H | -1.939683 | 2.872894  | -0.891181 |
| H | -0.428778 | 0.286376  | -1.471659 |
| H | -1.975419 | 1.954206  | -2.393405 |
| H | -1.592702 | -0.584365 | 2.897909  |
| H | -2.928297 | -1.747934 | 2.909380  |
| H | -3.127000 | -0.194565 | 2.103572  |
| H | -5.308765 | -1.502434 | -1.831459 |
| H | 3.960093  | 0.469696  | -0.249268 |
| H | 4.690354  | -0.743549 | 0.815210  |
| H | 2.936022  | -1.288794 | -1.633514 |

|   |          |           |           |
|---|----------|-----------|-----------|
| H | 5.031288 | -2.195945 | -2.645596 |
| H | 5.234810 | -0.491491 | -2.206020 |
| H | 5.930869 | -1.761962 | -1.184524 |
| H | 3.515151 | -3.702299 | -1.266605 |
| H | 2.593870 | -3.043766 | 0.093259  |
| H | 4.348501 | -3.265127 | 0.233873  |

M062X energy = -1154.58844891 a.u.

(2S,6R,7S,8R)-1, Conf. R

|   |           |           |           |
|---|-----------|-----------|-----------|
| C | -4.125882 | -0.869424 | -0.601494 |
| C | -3.116453 | 0.075324  | -1.192745 |
| C | -2.807116 | 1.314999  | -0.795197 |
| C | -3.605795 | 2.143481  | 0.177229  |
| C | -2.264108 | -1.502151 | 0.957132  |
| C | -3.371339 | -2.037191 | 0.085962  |
| C | -0.309833 | 1.088763  | -0.845314 |
| C | -0.173288 | 0.880492  | 0.689371  |
| C | 0.085151  | -0.607296 | 1.044129  |
| C | -1.007360 | -1.485780 | 0.503485  |
| O | 0.906621  | 1.711674  | -1.291264 |
| C | 1.712535  | 2.060402  | -0.264250 |
| C | 1.032525  | 1.713846  | 1.019978  |
| O | 2.798605  | 2.550067  | -0.421433 |
| C | 1.551150  | 2.057682  | 2.194068  |
| C | -1.506755 | 1.948485  | -1.266382 |
| C | -2.696707 | -0.806145 | 2.219805  |
| O | -4.946285 | -1.476328 | -1.585541 |
| O | 1.320137  | -0.931087 | 0.393376  |
| C | 2.433285  | -1.037611 | 1.167187  |
| O | 2.395418  | -1.216956 | 2.356581  |
| C | 3.692475  | -0.804525 | 0.365534  |
| C | 3.607443  | -1.052482 | -1.142322 |
| C | 4.883788  | -0.547900 | -1.813718 |
| C | 3.367866  | -2.531356 | -1.443397 |
| H | -4.745819 | -0.356993 | 0.147887  |
| H | -2.474478 | -0.404386 | -1.935783 |
| H | -3.874106 | 3.097941  | -0.291889 |
| H | -3.013065 | 2.395386  | 1.066102  |
| H | -2.963604 | -2.662365 | -0.715921 |
| H | -4.098920 | -2.637010 | 0.644579  |
| H | -4.527608 | 1.659994  | 0.506176  |
| H | -1.075513 | 1.211396  | 1.213696  |
| H | 0.220254  | -0.711321 | 2.124981  |
| H | -0.768714 | -1.997255 | -0.427981 |
| H | 1.087296  | 1.783802  | 3.137043  |
| H | 2.479004  | 2.622459  | 2.222764  |
| H | -1.386354 | 2.949023  | -0.832570 |
| H | -0.355225 | 0.126188  | -1.359891 |
| H | -1.480832 | 2.066316  | -2.355319 |
| H | -3.236273 | 0.122504  | 1.989083  |
| H | -1.856244 | -0.552557 | 2.870820  |
| H | -3.386173 | -1.440613 | 2.787666  |
| H | -5.384080 | -0.768937 | -2.079708 |
| H | 3.938896  | 0.252298  | 0.547398  |
| H | 4.489700  | -1.398330 | 0.826245  |
| H | 2.763079  | -0.470980 | -1.531736 |

|   |          |           |           |
|---|----------|-----------|-----------|
| H | 4.848370 | -0.718404 | -2.894214 |
| H | 5.015828 | 0.525239  | -1.642843 |
| H | 5.764151 | -1.070797 | -1.420435 |
| H | 3.290776 | -2.703230 | -2.521679 |
| H | 2.444627 | -2.889144 | -0.976525 |
| H | 4.199576 | -3.138849 | -1.066076 |

M062X energy = -1154.58844054 a.u.

(2R,6R,7S,8R)-1, Conf. A

|   |           |           |           |
|---|-----------|-----------|-----------|
| C | 4.460132  | -0.043910 | 0.425676  |
| C | 3.451893  | 0.977518  | -0.048068 |
| C | 2.591584  | 1.662878  | 0.708918  |
| C | 2.633812  | 1.667328  | 2.214516  |
| C | 2.527098  | -1.640106 | 0.090836  |
| C | 3.759796  | -1.348156 | 0.907095  |
| C | 0.155300  | 1.470789  | 0.147543  |
| C | 0.125716  | 0.304407  | -0.881544 |
| C | 0.087390  | -1.091816 | -0.221729 |
| C | 1.331913  | -1.304442 | 0.586269  |
| O | -0.994662 | 2.294409  | -0.114122 |
| C | -1.748110 | 1.831897  | -1.139617 |
| C | -1.109812 | 0.599926  | -1.684555 |
| O | -2.762148 | 2.366483  | -1.495541 |
| C | -1.660195 | -0.074381 | -2.689053 |
| C | 1.406257  | 2.361927  | 0.085636  |
| C | 2.763073  | -2.092263 | -1.324449 |
| O | 5.330986  | -0.417730 | -0.632402 |
| O | -1.047302 | -1.121713 | 0.653276  |
| C | -2.131327 | -1.845739 | 0.277340  |
| O | -2.167873 | -2.534453 | -0.710473 |
| C | -3.261133 | -1.609081 | 1.245682  |
| C | -3.863448 | -0.202194 | 1.054275  |
| C | -4.569663 | -0.087938 | -0.295854 |
| C | -4.825473 | 0.112669  | 2.198205  |
| H | 5.050292  | 0.345721  | 1.268989  |
| H | 3.334150  | 1.012514  | -1.133281 |
| H | 3.534883  | 1.193524  | 2.610578  |
| H | 1.768216  | 1.142982  | 2.639720  |
| H | 3.480062  | -1.217269 | 1.957980  |
| H | 4.505830  | -2.148679 | 0.845307  |
| H | 2.594214  | 2.695228  | 2.592716  |
| H | 1.025883  | 0.336757  | -1.508241 |
| H | -0.051979 | -1.851305 | -0.995151 |
| H | 1.264741  | -0.965202 | 1.620040  |
| H | -1.236424 | -0.995690 | -3.076989 |
| H | -2.581774 | 0.293956  | -3.132268 |
| H | 1.601833  | 2.618881  | -0.962149 |
| H | 0.021210  | 1.082799  | 1.162782  |
| H | 1.172100  | 3.290505  | 0.619170  |
| H | 3.303641  | -1.323068 | -1.888672 |
| H | 1.838925  | -2.335657 | -1.853617 |
| H | 3.406038  | -2.979179 | -1.332478 |
| H | 5.767489  | 0.384261  | -0.953757 |
| H | -4.022707 | -2.375309 | 1.073969  |
| H | -2.873176 | -1.710909 | 2.264798  |

|   |           |           |           |
|---|-----------|-----------|-----------|
| H | -3.036173 | 0.520745  | 1.087279  |
| H | -4.915065 | 0.935143  | -0.467311 |
| H | -3.908099 | -0.358436 | -1.124226 |
| H | -5.436381 | -0.759556 | -0.324846 |
| H | -5.262186 | 1.107873  | 2.072186  |
| H | -4.319698 | 0.081477  | 3.168757  |
| H | -5.646653 | -0.613942 | 2.220081  |

M062X energy = -1154.59276196 a.u.

(2R,6R,7S,8R)-1, Conf. B

|   |           |           |           |
|---|-----------|-----------|-----------|
| C | 4.465827  | -0.025417 | 0.401015  |
| C | 3.456723  | 0.997094  | -0.053937 |
| C | 2.589648  | 1.656582  | 0.716845  |
| C | 2.630027  | 1.632648  | 2.222619  |
| C | 2.529143  | -1.630066 | 0.099878  |
| C | 3.758856  | -1.323269 | 0.913972  |
| C | 0.153558  | 1.473951  | 0.160718  |
| C | 0.128849  | 0.310864  | -0.872233 |
| C | 0.089674  | -1.087847 | -0.217633 |
| C | 1.331778  | -1.300408 | 0.593953  |
| O | -0.997542 | 2.296171  | -0.101582 |
| C | -1.746870 | 1.835810  | -1.130537 |
| C | -1.104598 | 0.606842  | -1.678121 |
| O | -2.761550 | 2.368690  | -1.487489 |
| C | -1.650612 | -0.064595 | -2.686895 |
| C | 1.404444  | 2.365001  | 0.104416  |
| C | 2.767521  | -2.077716 | -1.316646 |
| O | 5.284444  | -0.291660 | -0.726988 |
| O | -1.047496 | -1.123377 | 0.653602  |
| C | -2.128395 | -1.849194 | 0.271971  |
| O | -2.158716 | -2.537279 | -0.716507 |
| C | -3.262961 | -1.615951 | 1.235551  |
| C | -3.867602 | -0.210184 | 1.043165  |
| C | -4.568607 | -0.096207 | -0.309682 |
| C | -4.835127 | 0.101231  | 2.183410  |
| H | 5.081345  | 0.368535  | 1.224583  |
| H | 3.368929  | 1.071239  | -1.138360 |
| H | 2.563179  | 2.652429  | 2.618458  |
| H | 3.546557  | 1.180654  | 2.609249  |
| H | 3.477793  | -1.171105 | 1.962049  |
| H | 4.491906  | -2.141966 | 0.883927  |
| H | 1.781012  | 1.077305  | 2.642154  |
| H | 1.031501  | 0.347594  | -1.495234 |
| H | -0.045484 | -1.845050 | -0.994125 |
| H | 1.260968  | -0.962875 | 1.627769  |
| H | -1.224025 | -0.983625 | -3.077170 |
| H | -2.571142 | 0.304202  | -3.131886 |
| H | 1.598253  | 2.631764  | -0.941149 |
| H | 0.016870  | 1.082963  | 1.174568  |
| H | 1.172572  | 3.288674  | 0.647417  |
| H | 3.286931  | -1.297285 | -1.885215 |
| H | 1.845400  | -2.342213 | -1.838929 |
| H | 3.425685  | -2.954204 | -1.328810 |
| H | 5.948287  | -0.946025 | -0.468759 |
| H | -4.022090 | -2.383695 | 1.059830  |
| H | -2.879113 | -1.717889 | 2.256232  |

|   |           |           |           |
|---|-----------|-----------|-----------|
| H | -3.042132 | 0.514527  | 1.080462  |
| H | -4.914763 | 0.926463  | -0.481924 |
| H | -3.903327 | -0.365247 | -1.135535 |
| H | -5.434197 | -0.769134 | -0.342401 |
| H | -5.273121 | 1.095776  | 2.056747  |
| H | -4.333528 | 0.069770  | 3.156126  |
| H | -5.655033 | -0.626957 | 2.200677  |

M062X energy = -1154.59191884 a.u.

(2R,6R,7S,8R)-1, Conf. C

|   |           |           |           |
|---|-----------|-----------|-----------|
| C | -4.407633 | -0.132968 | -0.333294 |
| C | -3.416533 | 0.925694  | 0.090112  |
| C | -2.585484 | 1.607718  | -0.701513 |
| C | -2.651367 | 1.569951  | -2.205591 |
| C | -2.428922 | -1.668561 | 0.012051  |
| C | -3.683123 | -1.432729 | -0.789274 |
| C | -0.125633 | 1.523917  | -0.173436 |
| C | -0.026130 | 0.376460  | 0.873534  |
| C | 0.002642  | -1.039893 | 0.259506  |
| C | -1.256714 | -1.296359 | -0.510848 |
| O | 0.977064  | 2.413939  | 0.073632  |
| C | 1.790460  | 1.981239  | 1.066502  |
| C | 1.234210  | 0.715207  | 1.621238  |
| O | 2.790872  | 2.560932  | 1.387256  |
| C | 1.860381  | 0.053040  | 2.588691  |
| C | -1.414362 | 2.360001  | -0.116513 |
| C | -2.627885 | -2.105680 | 1.437496  |
| O | -5.247836 | -0.496460 | 0.752956  |
| O | 1.114287  | -1.122151 | -0.646192 |
| C | 2.181334  | -1.870255 | -0.274027 |
| O | 2.261725  | -2.439885 | 0.785655  |
| C | 3.244091  | -1.887447 | -1.345816 |
| C | 4.122779  | -0.616753 | -1.360683 |
| C | 3.383825  | 0.603138  | -1.908395 |
| C | 4.715307  | -0.329695 | 0.018535  |
| H | -5.023884 | 0.215844  | -1.175771 |
| H | -3.279428 | 0.994943  | 1.171515  |
| H | -3.527472 | 1.032113  | -2.575129 |
| H | -1.760942 | 1.089944  | -2.631651 |
| H | -3.425232 | -1.325471 | -1.848314 |
| H | -4.406928 | -2.249749 | -0.691264 |
| H | -2.681026 | 2.588448  | -2.609700 |
| H | -0.898932 | 0.410154  | 1.539174  |
| H | 0.159597  | -1.766498 | 1.060359  |
| H | -1.222837 | -0.972350 | -1.551366 |
| H | 1.497416  | -0.892306 | 2.979518  |
| H | 2.786019  | 0.454638  | 2.992749  |
| H | -1.602000 | 2.634969  | 0.928130  |
| H | 0.024589  | 1.125760  | -1.183891 |
| H | -1.223046 | 3.284450  | -0.674120 |
| H | -3.192579 | -1.348434 | 1.994241  |
| H | -1.688318 | -2.301928 | 1.959002  |
| H | -3.234210 | -3.017637 | 1.468574  |
| H | -5.695188 | 0.304462  | 1.061825  |
| H | 3.868390  | -2.760113 | -1.138309 |
| H | 2.763457  | -2.015894 | -2.321045 |

|   |          |           |           |
|---|----------|-----------|-----------|
| H | 4.947653 | -0.845723 | -2.048222 |
| H | 2.552011 | 0.890778  | -1.259171 |
| H | 4.059989 | 1.461075  | -1.973267 |
| H | 2.977473 | 0.408770  | -2.906915 |
| H | 5.200568 | -1.216190 | 0.439753  |
| H | 3.936166 | -0.007711 | 0.718099  |
| H | 5.452346 | 0.476521  | -0.040903 |

M062X energy = -1154.59173822 a.u.

(2R,6R,7S,8R)-1, Conf. D

|   |           |           |           |
|---|-----------|-----------|-----------|
| C | -4.509506 | -0.485332 | -0.368708 |
| C | -3.627166 | 0.717279  | -0.126784 |
| C | -2.842471 | 1.327981  | -1.017821 |
| C | -2.873624 | 1.028549  | -2.493584 |
| C | -2.406778 | -1.751119 | 0.239615  |
| C | -3.662811 | -1.772143 | -0.592826 |
| C | -0.400058 | 1.546172  | -0.471352 |
| C | -0.230851 | 0.605431  | 0.756935  |
| C | -0.046115 | -0.880918 | 0.381053  |
| C | -1.259181 | -1.385514 | -0.339825 |
| O | 0.627161  | 2.548260  | -0.379793 |
| C | 1.447541  | 2.362380  | 0.680584  |
| C | 0.971632  | 1.179378  | 1.452802  |
| O | 2.393657  | 3.065459  | 0.905251  |
| C | 1.615643  | 0.764082  | 2.538814  |
| C | -1.753062 | 2.269520  | -0.562831 |
| C | -2.589479 | -1.929271 | 1.722046  |
| O | -5.334619 | -0.735526 | 0.760137  |
| O | 1.086726  | -0.972463 | -0.496332 |
| C | 2.215699  | -1.544729 | -0.019392 |
| O | 2.327787  | -1.984532 | 1.097625  |
| C | 3.309085  | -1.561522 | -1.060508 |
| C | 4.633795  | -1.036844 | -0.491165 |
| C | 5.748363  | -1.207632 | -1.521385 |
| C | 4.496513  | 0.424828  | -0.066274 |
| H | -5.137101 | -0.341584 | -1.261451 |
| H | -3.523880 | 0.983182  | 0.927426  |
| H | -1.946413 | 0.541808  | -2.822509 |
| H | -2.959081 | 1.958647  | -3.067225 |
| H | -3.396135 | -1.825009 | -1.653845 |
| H | -4.311712 | -2.623105 | -0.356832 |
| H | -3.706441 | 0.379011  | -2.772803 |
| H | -1.123044 | 0.661321  | 1.393874  |
| H | 0.173464  | -1.451351 | 1.287024  |
| H | -1.232313 | -1.254438 | -1.421661 |
| H | 1.313806  | -0.114812 | 3.099971  |
| H | 2.493071  | 1.311539  | 2.873465  |
| H | -1.984495 | 2.700555  | 0.418454  |
| H | -0.203162 | 0.995860  | -1.397603 |
| H | -1.629660 | 3.098077  | -1.270033 |
| H | -3.177599 | -1.102715 | 2.139023  |
| H | -1.641500 | -1.993652 | 2.261256  |
| H | -3.163475 | -2.839773 | 1.924455  |
| H | -5.858546 | 0.061407  | 0.925616  |
| H | 3.427401  | -2.602692 | -1.385875 |
| H | 2.998656  | -0.971513 | -1.928432 |

|   |          |           |           |
|---|----------|-----------|-----------|
| H | 4.867085 | -1.640033 | 0.394652  |
| H | 6.704382 | -0.855991 | -1.121689 |
| H | 5.867577 | -2.255561 | -1.816111 |
| H | 5.529986 | -0.624885 | -2.424195 |
| H | 5.441466 | 0.808193  | 0.330664  |
| H | 3.736347 | 0.549923  | 0.711118  |
| H | 4.212618 | 1.054547  | -0.918224 |

M062X energy = -1154.59146367 a.u.

(2R,6R,7S,8R)-1, Conf. E

|   |           |           |           |
|---|-----------|-----------|-----------|
| C | -4.464655 | -0.429734 | -0.237762 |
| C | -3.554667 | 0.737428  | 0.064907  |
| C | -2.814184 | 1.424191  | -0.807967 |
| C | -2.924376 | 1.260932  | -2.301046 |
| C | -2.351660 | -1.760450 | 0.145680  |
| C | -3.648426 | -1.698291 | -0.620305 |
| C | -0.342167 | 1.603161  | -0.366268 |
| C | -0.115860 | 0.551521  | 0.759273  |
| C | 0.018158  | -0.899805 | 0.252422  |
| C | -1.236165 | -1.326924 | -0.448663 |
| O | 0.678003  | 2.605626  | -0.216363 |
| C | 1.541103  | 2.329582  | 0.788286  |
| C | 1.131719  | 1.049443  | 1.434117  |
| O | 2.476583  | 3.031646  | 1.056255  |
| C | 1.865109  | 0.501715  | 2.397998  |
| C | -1.699690 | 2.322601  | -0.329311 |
| C | -2.463952 | -2.097876 | 1.607242  |
| O | -5.235935 | -0.773288 | 0.904739  |
| O | 1.106390  | -0.947982 | -0.683311 |
| C | 2.212495  | -1.648008 | -0.336009 |
| O | 2.355287  | -2.184315 | 0.735586  |
| C | 3.226197  | -1.657250 | -1.454990 |
| C | 4.447282  | -0.763217 | -1.153548 |
| C | 4.023884  | 0.673391  | -0.849686 |
| C | 5.303690  | -1.327180 | -0.020228 |
| H | -5.134757 | -0.199064 | -1.079718 |
| H | -3.388680 | 0.902851  | 1.131697  |
| H | -3.050244 | 2.238138  | -2.781240 |
| H | -3.764194 | 0.626852  | -2.594015 |
| H | -3.438157 | -1.659659 | -1.694583 |
| H | -4.295039 | -2.561538 | -0.426181 |
| H | -2.011093 | 0.820355  | -2.721437 |
| H | -0.968221 | 0.566766  | 1.451924  |
| H | 0.264855  | -1.546231 | 1.098328  |
| H | -1.264029 | -1.084717 | -1.511312 |
| H | 1.618461  | -0.452260 | 2.853526  |
| H | 2.762034  | 1.016106  | 2.733873  |
| H | -1.879969 | 2.665304  | 0.696491  |
| H | -0.179941 | 1.145599  | -1.348498 |
| H | -1.612390 | 3.211339  | -0.965343 |
| H | -2.989261 | -3.051027 | 1.732149  |
| H | -3.071091 | -1.347399 | 2.127428  |
| H | -1.493520 | -2.174174 | 2.102877  |
| H | -5.728253 | 0.014484  | 1.177176  |
| H | 3.554040  | -2.694215 | -1.583485 |
| H | 2.738399  | -1.324875 | -2.374668 |

|   |          |           |           |
|---|----------|-----------|-----------|
| H | 5.047356 | -0.765221 | -2.072628 |
| H | 3.554811 | 0.731304  | 0.137753  |
| H | 4.889269 | 1.342295  | -0.832773 |
| H | 3.309401 | 1.058901  | -1.585877 |
| H | 5.639580 | -2.345467 | -0.241837 |
| H | 4.736589 | -1.357912 | 0.915177  |
| H | 6.188409 | -0.701400 | 0.135094  |

M062X energy = -1154.59115685 a.u.

(2R,6R,7S,8R)-1, Conf. F

|   |           |           |           |
|---|-----------|-----------|-----------|
| C | 4.412875  | -0.112452 | 0.312959  |
| C | 3.421649  | 0.945148  | -0.096870 |
| C | 2.582894  | 1.604247  | 0.704757  |
| C | 2.645370  | 1.543686  | 2.208528  |
| C | 2.431616  | -1.658133 | -0.000705 |
| C | 3.681891  | -1.406434 | 0.800596  |
| C | 0.124132  | 1.525676  | 0.181733  |
| C | 0.028941  | 0.379897  | -0.867506 |
| C | -0.000709 | -1.037627 | -0.256189 |
| C | 1.256031  | -1.292295 | 0.518941  |
| O | -0.981057 | 2.413016  | -0.065186 |
| C | -1.790887 | 1.980831  | -1.060584 |
| C | -1.229938 | 0.717712  | -1.617914 |
| O | -2.792774 | 2.557808  | -1.381949 |
| C | -1.851955 | 0.057185  | -2.589116 |
| C | 1.412052  | 2.362671  | 0.127654  |
| C | 2.635597  | -2.091562 | -1.426746 |
| O | 5.206952  | -0.366955 | -0.835164 |
| O | -1.115099 | -1.123547 | 0.645539  |
| C | -2.179095 | -1.873908 | 0.269024  |
| O | -2.253385 | -2.444496 | -0.790584 |
| C | -3.246137 | -1.893347 | 1.336496  |
| C | -4.125922 | -0.623364 | 1.350662  |
| C | -3.390773 | 0.595939  | 1.904804  |
| C | -4.712577 | -0.333713 | -0.030493 |
| H | 5.050474  | 0.243265  | 1.137092  |
| H | 3.316462  | 1.048636  | -1.177395 |
| H | 2.635931  | 2.556564  | 2.627397  |
| H | 3.543886  | 1.038195  | 2.570524  |
| H | 3.421622  | -1.277924 | 1.857109  |
| H | 4.392957  | -2.242145 | 0.735049  |
| H | 1.775501  | 1.022843  | 2.629413  |
| H | 0.904055  | 0.416381  | -1.529978 |
| H | -0.153388 | -1.763320 | -1.058761 |
| H | 1.217116  | -0.968945 | 1.559192  |
| H | -1.485570 | -0.885787 | -2.982498 |
| H | -2.777230 | 0.458204  | -2.994569 |
| H | 1.598451  | 2.644193  | -0.915364 |
| H | -0.027008 | 1.125810  | 1.191462  |
| H | 1.221976  | 3.283582  | 0.691519  |
| H | 3.254503  | -2.995762 | -1.460265 |
| H | 3.183424  | -1.323837 | -1.985921 |
| H | 1.698034  | -2.306019 | -1.944424 |
| H | 5.862961  | -1.038669 | -0.602960 |
| H | -3.868954 | -2.766107 | 1.124981  |
| H | -2.769100 | -2.023300 | 2.313330  |



|   |           |           |           |
|---|-----------|-----------|-----------|
| H | -4.953600 | -0.854973 | 2.033950  |
| H | -4.068201 | 1.452952  | 1.968569  |
| H | -2.989115 | 0.399552  | 2.904843  |
| H | -2.556189 | 0.886291  | 1.260423  |
| H | -5.450695 | 0.471611  | 0.027497  |
| H | -5.195060 | -1.219714 | -0.455960 |
| H | -3.930668 | -0.009112 | -0.725683 |

M062X energy = -1154.59086087 a.u.

(2R,6R,7S,8R)-1, Conf. G

|   |           |           |           |
|---|-----------|-----------|-----------|
| C | 4.318271  | -1.222018 | 0.297266  |
| C | 3.736289  | 0.165635  | 0.162254  |
| C | 3.106046  | 0.864708  | 1.108661  |
| C | 3.055947  | 0.448715  | 2.555326  |
| C | 1.989964  | -1.918389 | -0.387810 |
| C | 3.196265  | -2.291278 | 0.434655  |
| C | 0.782957  | 1.709581  | 0.606649  |
| C | 0.395767  | 0.942329  | -0.692425 |
| C | -0.093530 | -0.503122 | -0.462066 |
| C | 0.960753  | -1.319360 | 0.218854  |
| O | 0.049066  | 2.946163  | 0.598114  |
| C | -0.802303 | 3.044697  | -0.449189 |
| C | -0.669850 | 1.820793  | -1.290314 |
| O | -1.526334 | 3.986666  | -0.614052 |
| C | -1.462116 | 1.623171  | -2.339255 |
| C | 2.271222  | 2.068739  | 0.744874  |
| C | 2.140860  | -2.047231 | -1.879145 |
| O | 5.065899  | -1.567053 | -0.860187 |
| O | -1.256260 | -0.439180 | 0.378322  |
| C | -2.448988 | -0.756220 | -0.174091 |
| O | -2.582774 | -1.147778 | -1.306895 |
| C | -3.569687 | -0.519018 | 0.809379  |
| C | -4.894663 | -1.144869 | 0.376104  |
| C | -4.811373 | -2.671284 | 0.392807  |
| C | -6.026208 | -0.651534 | 1.276568  |
| H | 4.959993  | -1.296632 | 1.188288  |
| H | 3.700988  | 0.531154  | -0.866231 |
| H | 3.349320  | 1.284765  | 3.200506  |
| H | 3.713122  | -0.396202 | 2.773462  |
| H | 2.914706  | -2.358988 | 1.490971  |
| H | 3.632833  | -3.249703 | 0.131911  |
| H | 2.038492  | 0.164738  | 2.853744  |
| H | 1.269580  | 0.877727  | -1.354584 |
| H | -0.388120 | -0.930090 | -1.423666 |
| H | 0.953725  | -1.253157 | 1.307026  |
| H | -1.422970 | 0.722455  | -2.943888 |
| H | -2.196550 | 2.382721  | -2.593785 |
| H | 2.607119  | 2.511816  | -0.200068 |
| H | 0.440654  | 1.155100  | 1.487765  |
| H | 2.344311  | 2.842769  | 1.517878  |
| H | 2.902019  | -1.350099 | -2.249743 |
| H | 1.207533  | -1.867575 | -2.417713 |
| H | 2.499555  | -3.049768 | -2.135287 |
| H | 5.767000  | -0.908216 | -0.967821 |
| H | -3.255341 | -0.889163 | 1.792921  |
| H | -3.664086 | 0.571180  | 0.909881  |

|   |           |           |           |
|---|-----------|-----------|-----------|
| H | -5.088641 | -0.821949 | -0.653837 |
| H | -5.756985 | -3.114194 | 0.064727  |
| H | -4.020553 | -3.031569 | -0.270369 |
| H | -4.607630 | -3.033011 | 1.408379  |
| H | -6.984078 | -1.082166 | 0.968696  |
| H | -6.119098 | 0.439000  | 1.245931  |
| H | -5.847413 | -0.945760 | 2.317890  |

M062X energy = -1154.59061929 a.u.

(2R,6R,7S,8R)-1, Conf. H

|   |           |           |           |
|---|-----------|-----------|-----------|
| C | -4.517002 | -0.463123 | -0.343013 |
| C | -3.634079 | 0.736288  | -0.115478 |
| C | -2.843825 | 1.326274  | -1.014461 |
| C | -2.875041 | 1.007350  | -2.486516 |
| C | -2.407758 | -1.745763 | 0.218848  |
| C | -3.663562 | -1.745842 | -0.613250 |
| C | -0.401142 | 1.549268  | -0.480475 |
| C | -0.234341 | 0.607299  | 0.747241  |
| C | -0.047626 | -0.878756 | 0.370662  |
| C | -1.258023 | -1.380448 | -0.356405 |
| O | 0.628305  | 2.549220  | -0.387425 |
| C | 1.446217  | 2.362083  | 0.674099  |
| C | 0.966551  | 1.180340  | 1.446334  |
| O | 2.393967  | 3.062592  | 0.900428  |
| C | 1.606310  | 0.766014  | 2.535189  |
| C | -1.753992 | 2.272500  | -0.570748 |
| C | -2.591144 | -1.930898 | 1.700609  |
| O | -5.296739 | -0.599798 | 0.834535  |
| O | 1.088666  | -0.970718 | -0.501809 |
| C | 2.214284  | -1.546207 | -0.020587 |
| O | 2.319429  | -1.989996 | 1.095532  |
| C | 3.313150  | -1.561570 | -1.055884 |
| C | 4.635559  | -1.040030 | -0.478337 |
| C | 5.755332  | -1.210759 | -1.502888 |
| C | 4.498202  | 0.421024  | -0.051426 |
| H | -5.174970 | -0.308353 | -1.212288 |
| H | -3.561182 | 1.030237  | 0.932050  |
| H | -3.730399 | 0.385399  | -2.761295 |
| H | -1.964641 | 0.485029  | -2.808180 |
| H | -3.399451 | -1.767454 | -1.676432 |
| H | -4.295800 | -2.622253 | -0.412007 |
| H | -2.928179 | 1.932550  | -3.071644 |
| H | -1.128618 | 0.663037  | 1.381294  |
| H | 0.167209  | -1.450505 | 1.277003  |
| H | -1.227935 | -1.243596 | -1.437150 |
| H | 1.301356  | -0.111384 | 3.097019  |
| H | 2.483002  | 1.313243  | 2.872126  |
| H | -1.982032 | 2.708974  | 0.408810  |
| H | -0.204356 | 1.000102  | -1.407527 |
| H | -1.633815 | 3.097055  | -1.283172 |
| H | -3.181856 | -2.832284 | 1.899231  |
| H | -3.157288 | -1.094110 | 2.127154  |
| H | -1.642641 | -2.023236 | 2.234605  |
| H | -5.881302 | -1.361897 | 0.721098  |
| H | 3.431969  | -2.602064 | -1.383281 |
| H | 3.007900  | -0.968921 | -1.923828 |

|   |          |           |           |
|---|----------|-----------|-----------|
| H | 4.863191 | -1.645319 | 0.407562  |
| H | 6.709743 | -0.861379 | -1.097417 |
| H | 5.874461 | -2.258372 | -1.798837 |
| H | 5.542769 | -0.626032 | -2.405805 |
| H | 5.441819 | 0.802402  | 0.350560  |
| H | 3.734586 | 0.545724  | 0.722606  |
| H | 4.219013 | 1.052734  | -0.903432 |

M062X energy = -1154.59060660 a.u.

(2R,6R,7S,8R)-1, Conf. I

|   |           |           |           |
|---|-----------|-----------|-----------|
| C | -4.502169 | -0.683974 | -0.134140 |
| C | -3.679929 | 0.550528  | 0.153725  |
| C | -3.046102 | 1.315487  | -0.738323 |
| C | -3.223163 | 1.173358  | -2.227369 |
| C | -2.273613 | -1.846516 | 0.122839  |
| C | -3.600269 | -1.866099 | -0.591992 |
| C | -0.578910 | 1.645805  | -0.417714 |
| C | -0.213930 | 0.626598  | 0.700659  |
| C | 0.019468  | -0.807566 | 0.172979  |
| C | -1.214647 | -1.321483 | -0.501745 |
| O | 0.396429  | 2.700606  | -0.363037 |
| C | 1.353066  | 2.481872  | 0.566902  |
| C | 1.033585  | 1.221235  | 1.295682  |
| O | 2.288937  | 3.216949  | 0.724847  |
| C | 1.830944  | 0.765121  | 2.256254  |
| C | -1.972719 | 2.282216  | -0.296566 |
| C | -2.302061 | -2.221901 | 1.579458  |
| O | -5.179890 | -1.120607 | 1.035177  |
| O | 1.089846  | -0.722967 | -0.778612 |
| C | 2.299874  | -1.211558 | -0.415373 |
| O | 2.484646  | -1.846297 | 0.593365  |
| C | 3.341083  | -0.842241 | -1.447324 |
| C | 4.769365  | -0.728829 | -0.894880 |
| C | 4.835794  | 0.221687  | 0.303449  |
| C | 5.375674  | -2.091655 | -0.557299 |
| H | -5.232625 | -0.494878 | -0.935215 |
| H | -3.471351 | 0.705162  | 1.214686  |
| H | -2.314418 | 0.779203  | -2.700948 |
| H | -3.413964 | 2.151805  | -2.682647 |
| H | -3.436691 | -1.771677 | -1.670920 |
| H | -4.165078 | -2.786876 | -0.406751 |
| H | -4.048985 | 0.508513  | -2.490824 |
| H | -1.025140 | 0.573878  | 1.437919  |
| H | 0.340189  | -1.444675 | 1.000750  |
| H | -1.299402 | -1.060297 | -1.556635 |
| H | 1.646449  | -0.171111 | 2.774463  |
| H | 2.714976  | 1.337000  | 2.525323  |
| H | -2.125569 | 2.599177  | 0.741856  |
| H | -0.463152 | 1.179844  | -1.402105 |
| H | -1.973915 | 3.181990  | -0.922698 |
| H | -2.785010 | -3.196798 | 1.705853  |
| H | -2.909701 | -1.508539 | 2.148914  |
| H | -1.306121 | -2.273013 | 2.025248  |
| H | -5.730544 | -0.388942 | 1.348853  |
| H | 3.295129  | -1.600115 | -2.241053 |
| H | 3.027408  | 0.104159  | -1.899052 |

|   |          |           |           |
|---|----------|-----------|-----------|
| H | 5.361448 | -0.288552 | -1.708181 |
| H | 4.360652 | -0.236157 | 1.176844  |
| H | 5.877176 | 0.438250  | 0.561184  |
| H | 4.331674 | 1.174082  | 0.100148  |
| H | 5.375625 | -2.752533 | -1.431102 |
| H | 4.810674 | -2.577633 | 0.241917  |
| H | 6.412487 | -1.975258 | -0.225088 |

M062X energy = -1154.59036081 a.u.

(2R,6R,7S,8R)-1, Conf. J

|   |           |           |           |
|---|-----------|-----------|-----------|
| C | -4.256744 | -0.647122 | -1.099443 |
| C | -3.229290 | 0.443503  | -1.291549 |
| C | -2.854417 | 1.463800  | -0.511322 |
| C | -3.555700 | 1.976644  | 0.722405  |
| C | -2.399368 | -1.762207 | 0.206234  |
| C | -3.519054 | -1.978914 | -0.781198 |
| C | -0.344934 | 1.218784  | -0.720586 |
| C | -0.194969 | 0.504936  | 0.651939  |
| C | -0.004432 | -1.023595 | 0.511888  |
| C | -1.149051 | -1.635806 | -0.246786 |
| O | 0.857263  | 1.978544  | -0.929041 |
| C | 1.630211  | 2.033227  | 0.180715  |
| C | 1.013507  | 1.179059  | 1.237557  |
| O | 2.646618  | 2.670179  | 0.235903  |
| C | 1.564381  | 1.058347  | 2.440977  |
| C | -1.543056 | 2.173257  | -0.820175 |
| C | -2.801941 | -1.492660 | 1.629922  |
| O | -5.196005 | -0.432001 | -0.060162 |
| O | 1.190517  | -1.241679 | -0.249332 |
| C | 2.281420  | -1.730433 | 0.393393  |
| O | 2.298629  | -2.008793 | 1.565439  |
| C | 3.442127  | -1.822803 | -0.562780 |
| C | 4.022832  | -0.428741 | -0.872193 |
| C | 4.645954  | 0.191786  | 0.377061  |
| C | 5.051313  | -0.534781 | -1.996708 |
| H | -4.794359 | -0.799571 | -2.048494 |
| H | -2.600713 | 0.239185  | -2.162243 |
| H | -2.862941 | 2.001078  | 1.573368  |
| H | -4.422157 | 1.383950  | 1.007209  |
| H | -3.112818 | -2.374968 | -1.717746 |
| H | -4.274086 | -2.681711 | -0.411489 |
| H | -3.867291 | 3.016323  | 0.558244  |
| H | -1.088293 | 0.663430  | 1.265891  |
| H | 0.131366  | -1.460038 | 1.506010  |
| H | -0.940435 | -1.830058 | -1.298315 |
| H | 1.150576  | 0.409302  | 3.206824  |
| H | 2.470116  | 1.613104  | 2.670918  |
| H | -1.381396 | 2.993305  | -0.109578 |
| H | -0.384752 | 0.487269  | -1.531594 |
| H | -1.542923 | 2.617872  | -1.821463 |
| H | -3.309003 | -0.523726 | 1.708018  |
| H | -1.948683 | -1.499164 | 2.313792  |
| H | -3.521973 | -2.244293 | 1.970335  |
| H | -5.746374 | 0.323136  | -0.313678 |
| H | 4.206568  | -2.457131 | -0.103987 |
| H | 3.094584  | -2.292979 | -1.488876 |

|   |          |           |           |
|---|----------|-----------|-----------|
| H | 3.197908 | 0.209814  | -1.215415 |
| H | 3.933700 | 0.232861  | 1.206710  |
| H | 5.507914 | -0.403673 | 0.702194  |
| H | 4.980719 | 1.212626  | 0.175334  |
| H | 5.471898 | 0.448498  | -2.228034 |
| H | 4.606562 | -0.939437 | -2.911667 |
| H | 5.877386 | -1.192687 | -1.700835 |

M062X energy = -1154.58998272 a.u.

(2R,6R,7S,8R)-1, Conf. K

|   |           |           |           |
|---|-----------|-----------|-----------|
| C | 4.033736  | -1.250532 | 0.268596  |
| C | 3.465031  | 0.136228  | 0.455932  |
| C | 2.706899  | 0.562044  | 1.468746  |
| C | 2.459503  | -0.241996 | 2.718123  |
| C | 1.830133  | -1.644847 | -0.903531 |
| C | 2.914277  | -2.277682 | -0.070513 |
| C | 0.471545  | 1.596999  | 0.920463  |
| C | 0.267779  | 1.238775  | -0.581372 |
| C | -0.236281 | -0.196834 | -0.833710 |
| C | 0.726807  | -1.206804 | -0.289501 |
| O | -0.256986 | 2.812051  | 1.163279  |
| C | -0.958633 | 3.230041  | 0.083956  |
| C | -0.717839 | 2.280265  | -1.039388 |
| O | -1.649869 | 4.210311  | 0.096750  |
| C | -1.372755 | 2.395933  | -2.190106 |
| C | 1.925511  | 1.848288  | 1.353023  |
| C | 2.182699  | -1.356276 | -2.336859 |
| O | 4.949850  | -1.275510 | -0.816710 |
| O | -1.491485 | -0.342018 | -0.153719 |
| C | -2.602587 | -0.524848 | -0.906478 |
| O | -2.599825 | -0.553761 | -2.110822 |
| C | -3.813637 | -0.699270 | -0.024321 |
| C | -3.630434 | -1.806754 | 1.024955  |
| C | -4.907548 | -1.956453 | 1.849125  |
| C | -3.245299 | -3.128229 | 0.359824  |
| H | 4.536321  | -1.597877 | 1.183875  |
| H | 3.568369  | 0.777657  | -0.422120 |
| H | 3.065101  | -1.150226 | 2.761351  |
| H | 1.405888  | -0.539566 | 2.798065  |
| H | 2.488335  | -2.641904 | 0.870518  |
| H | 3.399535  | -3.119372 | -0.577389 |
| H | 2.682975  | 0.359472  | 3.606836  |
| H | 1.222725  | 1.338912  | -1.114681 |
| H | -0.410078 | -0.325223 | -1.904749 |
| H | 0.575979  | -1.450821 | 0.762728  |
| H | -1.252124 | 1.689933  | -3.005846 |
| H | -2.075796 | 3.214377  | -2.317934 |
| H | 2.387336  | 2.527972  | 0.627262  |
| H | 0.012356  | 0.830437  | 1.555176  |
| H | 1.886668  | 2.370043  | 2.316644  |
| H | 3.035740  | -0.669457 | -2.388555 |
| H | 1.351573  | -0.931952 | -2.904584 |
| H | 2.505213  | -2.276813 | -2.835724 |
| H | 5.649640  | -0.633824 | -0.628048 |
| H | -4.010269 | 0.258224  | 0.473628  |
| H | -4.659573 | -0.923397 | -0.680955 |

|   |           |           |           |
|---|-----------|-----------|-----------|
| H | -2.813632 | -1.501094 | 1.689693  |
| H | -4.783789 | -2.717876 | 2.625432  |
| H | -5.182283 | -1.015596 | 2.337039  |
| H | -5.744510 | -2.262295 | 1.210517  |
| H | -3.142909 | -3.923250 | 1.104971  |
| H | -2.292713 | -3.046873 | -0.175326 |
| H | -4.013012 | -3.436492 | -0.359838 |

M062X energy = -1154.58976402 a.u.

(2R,6R,7S,8R)-1, Conf. L

|   |           |           |           |
|---|-----------|-----------|-----------|
| C | 4.333139  | -1.193566 | 0.282468  |
| C | 3.745786  | 0.188337  | 0.161251  |
| C | 3.099362  | 0.865868  | 1.111220  |
| C | 3.041495  | 0.433920  | 2.553148  |
| C | 1.998547  | -1.912039 | -0.372290 |
| C | 3.208397  | -2.266600 | 0.451770  |
| C | 0.777782  | 1.709198  | 0.612578  |
| C | 0.398602  | 0.938241  | -0.686695 |
| C | -0.089854 | -0.507419 | -0.455087 |
| C | 0.963633  | -1.319883 | 0.231393  |
| O | 0.038288  | 2.942656  | 0.599017  |
| C | -0.809043 | 3.035949  | -0.451394 |
| C | -0.667139 | 1.811863  | -1.291183 |
| O | -1.537983 | 3.973510  | -0.620374 |
| C | -1.453344 | 1.610119  | -2.343868 |
| C | 2.264286  | 2.071994  | 0.755612  |
| C | 2.152592  | -2.036017 | -1.864023 |
| O | 5.074231  | -1.404834 | -0.908690 |
| O | -1.255640 | -0.443096 | 0.380507  |
| C | -2.445437 | -0.764924 | -0.175691 |
| O | -2.572355 | -1.170864 | -1.304217 |
| C | -3.572019 | -0.512072 | 0.796888  |
| C | -4.893920 | -1.146713 | 0.367137  |
| C | -4.808649 | -2.672534 | 0.409347  |
| C | -6.030582 | -0.640336 | 1.253778  |
| H | 4.999691  | -1.263305 | 1.156028  |
| H | 3.750307  | 0.574511  | -0.858499 |
| H | 3.322390  | 1.267816  | 3.206713  |
| H | 3.710699  | -0.402561 | 2.768133  |
| H | 2.932484  | -2.316109 | 1.511001  |
| H | 3.628073  | -3.243805 | 0.174233  |
| H | 2.026802  | 0.135010  | 2.846307  |
| H | 1.276205  | 0.874159  | -1.343889 |
| H | -0.380104 | -0.937365 | -1.416780 |
| H | 0.951752  | -1.253625 | 1.319271  |
| H | -1.407136 | 0.709338  | -2.947991 |
| H | -2.189307 | 2.366619  | -2.602994 |
| H | 2.601146  | 2.521955  | -0.185607 |
| H | 0.433627  | 1.155133  | 1.493313  |
| H | 2.334443  | 2.840910  | 1.534036  |
| H | 2.889948  | -1.315072 | -2.237170 |
| H | 1.212468  | -1.886597 | -2.399893 |
| H | 2.536841  | -3.029120 | -2.122704 |
| H | 5.472810  | -2.285026 | -0.863994 |
| H | -3.263278 | -0.864066 | 1.788819  |
| H | -3.667859 | 0.579718  | 0.877011  |

|   |           |           |           |
|---|-----------|-----------|-----------|
| H | -5.083164 | -0.841023 | -0.668920 |
| H | -5.751936 | -3.122235 | 0.083835  |
| H | -4.013972 | -3.042406 | -0.243909 |
| H | -4.609507 | -3.017128 | 1.431773  |
| H | -6.986384 | -1.077109 | 0.948146  |
| H | -6.124560 | 0.449441  | 1.205026  |
| H | -5.856611 | -0.917351 | 2.300620  |

M062X energy = -1154.58975417 a.u.

(2R,6R,7S,8R)-1, Conf. M

|   |           |           |           |
|---|-----------|-----------|-----------|
| C | -4.508730 | -0.664595 | -0.111135 |
| C | -3.687120 | 0.567986  | 0.162425  |
| C | -3.043108 | 1.311648  | -0.739067 |
| C | -3.214044 | 1.149248  | -2.227132 |
| C | -2.277384 | -1.838069 | 0.109140  |
| C | -3.604427 | -1.840927 | -0.603948 |
| C | -0.578017 | 1.649846  | -0.423670 |
| C | -0.216296 | 0.629284  | 0.694533  |
| C | 0.017215  | -0.804685 | 0.166164  |
| C | -1.215780 | -1.315427 | -0.512802 |
| O | 0.398605  | 2.703719  | -0.365596 |
| C | 1.353876  | 2.481998  | 0.564454  |
| C | 1.031280  | 1.221191  | 1.292024  |
| O | 2.291936  | 3.214122  | 0.723903  |
| C | 1.826006  | 0.763819  | 2.254134  |
| C | -1.972364 | 2.284659  | -0.305100 |
| C | -2.307656 | -2.214277 | 1.565812  |
| O | -5.151323 | -0.983326 | 1.113214  |
| O | 1.089943  | -0.721438 | -0.782587 |
| C | 2.298069  | -1.213064 | -0.416714 |
| O | 2.477900  | -1.852405 | 0.590001  |
| C | 3.343520  | -0.840909 | -1.443307 |
| C | 4.770107  | -0.732549 | -0.885447 |
| C | 4.834492  | 0.212664  | 0.317129  |
| C | 5.372495  | -2.098073 | -0.551608 |
| H | -5.262253 | -0.471770 | -0.890166 |
| H | -3.514435 | 0.749378  | 1.223763  |
| H | -2.317178 | 0.720613  | -2.693571 |
| H | -3.375288 | 2.125764  | -2.697543 |
| H | -3.444054 | -1.724096 | -1.681546 |
| H | -4.155312 | -2.780044 | -0.451982 |
| H | -4.060812 | 0.507929  | -2.483410 |
| H | -1.029322 | 0.577533  | 1.429867  |
| H | 0.334530  | -1.443366 | 0.994103  |
| H | -1.297329 | -1.051723 | -1.567056 |
| H | 1.639069  | -0.171992 | 2.772260  |
| H | 2.710147  | 1.334616  | 2.525154  |
| H | -2.125447 | 2.607421  | 0.731377  |
| H | -0.459436 | 1.185265  | -1.408418 |
| H | -1.976031 | 3.180681  | -0.936629 |
| H | -2.802959 | -3.183535 | 1.693866  |
| H | -2.898475 | -1.490160 | 2.139368  |
| H | -1.310584 | -2.285090 | 2.006056  |
| H | -5.692542 | -1.772523 | 0.972432  |
| H | 3.299259  | -1.595235 | -2.240535 |
| H | 3.033041  | 0.107993  | -1.891906 |

|   |          |           |           |
|---|----------|-----------|-----------|
| H | 5.365744 | -0.290048 | -1.694930 |
| H | 5.875499 | 0.426876  | 0.578304  |
| H | 4.331965 | 1.166520  | 0.116729  |
| H | 4.356660 | -0.248356 | 1.187368  |
| H | 6.408485 | -1.985251 | -0.215649 |
| H | 5.373794 | -2.755450 | -1.428061 |
| H | 4.803959 | -2.585932 | 0.243961  |

M062X energy = -1154.58953553 a.u.

(2R,6R,7S,8S)-1, Conf. A

|   |           |           |           |
|---|-----------|-----------|-----------|
| C | 1.870066  | -3.307426 | -0.336302 |
| C | 2.474407  | -1.975424 | -0.712575 |
| C | 3.130030  | -1.141151 | 0.097367  |
| C | 3.560521  | -1.510485 | 1.492938  |
| C | -0.096238 | -1.822356 | 0.234716  |
| C | 0.601171  | -3.121032 | 0.553711  |
| C | 2.295035  | 1.215928  | 0.356015  |
| C | 0.869881  | 1.180368  | -0.278465 |
| C | -0.182602 | 0.671207  | 0.730278  |
| C | 0.066860  | -0.780400 | 1.059592  |
| O | 2.770815  | 2.566269  | 0.250843  |
| C | 1.879767  | 3.393152  | -0.346134 |
| C | 0.666195  | 2.605897  | -0.713556 |
| O | 2.094460  | 4.558851  | -0.525836 |
| C | -0.353114 | 3.191016  | -1.335363 |
| C | 3.342840  | 0.299944  | -0.296805 |
| C | -0.771791 | -1.776146 | -1.111111 |
| O | 1.458989  | -4.018893 | -1.495945 |
| O | -1.477812 | 0.889719  | 0.154715  |
| C | -2.503852 | 0.898787  | 1.040101  |
| O | -2.348109 | 0.788138  | 2.228789  |
| C | -3.829448 | 1.001062  | 0.331326  |
| C | -4.140918 | -0.289742 | -0.448025 |
| C | -4.045403 | -1.512858 | 0.464802  |
| C | -5.523539 | -0.186938 | -1.088864 |
| H | 2.585529  | -3.919030 | 0.233053  |
| H | 2.174938  | -1.615492 | -1.699069 |
| H | 3.450051  | -2.578262 | 1.695725  |
| H | 2.976543  | -0.969837 | 2.248782  |
| H | 0.911962  | -3.125165 | 1.603556  |
| H | -0.034534 | -3.996772 | 0.379463  |
| H | 4.610234  | -1.239594 | 1.653473  |
| H | 0.867088  | 0.502629  | -1.140912 |
| H | -0.121284 | 1.272716  | 1.643135  |
| H | 0.568627  | -0.952351 | 2.010798  |
| H | -1.243439 | 2.645417  | -1.625925 |
| H | -0.290736 | 4.252670  | -1.558928 |
| H | 3.287977  | 0.426969  | -1.384328 |
| H | 2.236131  | 0.996720  | 1.429047  |
| H | 4.325919  | 0.657209  | 0.031856  |
| H | -1.052737 | -0.767472 | -1.414927 |
| H | -1.684387 | -2.386261 | -1.082496 |
| H | -0.128439 | -2.230777 | -1.871730 |
| H | 2.233643  | -4.122158 | -2.067278 |
| H | -4.593046 | 1.173901  | 1.095352  |

|   |           |           |           |
|---|-----------|-----------|-----------|
| H | -3.812998 | 1.856787  | -0.352860 |
| H | -3.391443 | -0.388054 | -1.243560 |
| H | -3.041800 | -1.627902 | 0.890088  |
| H | -4.751161 | -1.423394 | 1.299065  |
| H | -4.288214 | -2.426580 | -0.087527 |
| H | -6.296936 | -0.090210 | -0.318030 |
| H | -5.748085 | -1.081472 | -1.677942 |
| H | -5.595353 | 0.682658  | -1.750280 |

M062X energy = -1154.58726526 a.u.

(2R,6R,7S,8S)-1, Conf. B

|   |           |           |           |
|---|-----------|-----------|-----------|
| C | 1.935070  | -3.317572 | -0.329897 |
| C | 2.573970  | -1.986543 | -0.644228 |
| C | 3.186308  | -1.172037 | 0.217932  |
| C | 3.526085  | -1.563621 | 1.631895  |
| C | -0.062378 | -1.828642 | 0.118713  |
| C | 0.612041  | -3.130336 | 0.475853  |
| C | 2.362797  | 1.194577  | 0.446658  |
| C | 0.987425  | 1.193775  | -0.290011 |
| C | -0.144736 | 0.670322  | 0.618645  |
| C | 0.079730  | -0.785486 | 0.945073  |
| O | 2.867736  | 2.537299  | 0.398031  |
| C | 2.032202  | 3.390983  | -0.240005 |
| C | 0.832058  | 2.633102  | -0.701203 |
| O | 2.277430  | 4.555935  | -0.381271 |
| C | -0.139085 | 3.253714  | -1.364408 |
| C | 3.440958  | 0.271070  | -0.143162 |
| C | -0.688638 | -1.794356 | -1.251442 |
| O | 1.596284  | -4.008185 | -1.524967 |
| O | -1.379280 | 0.894261  | -0.075666 |
| C | -2.491669 | 0.777915  | 0.681689  |
| O | -2.462178 | 0.580402  | 1.869845  |
| C | -3.752679 | 0.911548  | -0.139217 |
| C | -4.806187 | -0.105813 | 0.312906  |
| C | -6.122699 | 0.126747  | -0.424344 |
| C | -4.297571 | -1.531551 | 0.096434  |
| H | 2.605109  | -3.944312 | 0.276902  |
| H | 2.338714  | -1.607901 | -1.641241 |
| H | 3.378610  | -2.629780 | 1.818217  |
| H | 2.912713  | -1.014191 | 2.357664  |
| H | 0.855150  | -3.140640 | 1.543412  |
| H | -0.013769 | -4.003304 | 0.257728  |
| H | 4.570875  | -1.319493 | 1.855406  |
| H | 1.037796  | 0.537345  | -1.167754 |
| H | -0.168890 | 1.259148  | 1.542137  |
| H | 0.546525  | -0.961353 | 1.913340  |
| H | -1.021836 | 2.735399  | -1.720156 |
| H | -0.042671 | 4.319641  | -1.553219 |
| H | 3.462782  | 0.410553  | -1.230301 |
| H | 2.221675  | 0.960610  | 1.509076  |
| H | 4.403502  | 0.612756  | 0.255391  |
| H | -0.010074 | -2.245296 | -1.983370 |
| H | -0.970187 | -0.791940 | -1.573731 |
| H | -1.592871 | -2.416611 | -1.252015 |
| H | 2.405670  | -4.109441 | -2.046341 |
| H | -4.129587 | 1.933468  | -0.004644 |

|   |           |           |           |
|---|-----------|-----------|-----------|
| H | -3.514346 | 0.783994  | -1.200993 |
| H | -4.960925 | 0.047796  | 1.387323  |
| H | -6.505077 | 1.138645  | -0.255016 |
| H | -5.990083 | -0.008072 | -1.504562 |
| H | -6.885703 | -0.583570 | -0.091172 |
| H | -5.028203 | -2.265214 | 0.450714  |
| H | -3.357937 | -1.705160 | 0.633363  |
| H | -4.124902 | -1.717551 | -0.971217 |

M062X energy = -1154.58689725 a.u.

(2R,6R,7S,8S)-1, Conf. C

|   |           |           |           |
|---|-----------|-----------|-----------|
| C | 3.148808  | -2.661472 | -0.224101 |
| C | 3.283250  | -1.192550 | -0.545228 |
| C | 3.533842  | -0.207970 | 0.320386  |
| C | 3.932346  | -0.444408 | 1.753601  |
| C | 0.733667  | -1.983903 | 0.107822  |
| C | 1.813421  | -2.950651 | 0.527746  |
| C | 1.907009  | 1.704261  | 0.466625  |
| C | 0.664239  | 1.211909  | -0.337712 |
| C | -0.259500 | 0.326420  | 0.526866  |
| C | 0.455303  | -0.947079 | 0.905556  |
| O | 1.897498  | 3.139201  | 0.423873  |
| C | 0.851378  | 3.637295  | -0.277073 |
| C | 0.035155  | 2.499880  | -0.794399 |
| O | 0.669124  | 4.812852  | -0.425913 |
| C | -1.042228 | 2.730539  | -1.538745 |
| C | 3.272572  | 1.229995  | -0.057403 |
| C | 0.195516  | -2.197596 | -1.283724 |
| O | 3.130472  | -3.438642 | -1.413831 |
| O | -1.450638 | 0.096418  | -0.236029 |
| C | -2.506540 | -0.377926 | 0.463200  |
| O | -2.486379 | -0.543456 | 1.655807  |
| C | -3.664932 | -0.685503 | -0.456503 |
| C | -4.970654 | -0.961984 | 0.287774  |
| C | -5.482230 | 0.299690  | 0.983165  |
| C | -6.017598 | -1.511592 | -0.680383 |
| H | 3.972242  | -3.001554 | 0.421164  |
| H | 2.967193  | -0.930358 | -1.557176 |
| H | 4.163394  | -1.492368 | 1.957575  |
| H | 3.134296  | -0.142960 | 2.444554  |
| H | 1.996981  | -2.855844 | 1.603040  |
| H | 1.552020  | -3.993642 | 0.315092  |
| H | 4.812716  | 0.155909  | 2.009793  |
| H | 0.992303  | 0.608779  | -1.193502 |
| H | -0.544937 | 0.875718  | 1.430995  |
| H | 0.915341  | -0.924765 | 1.892775  |
| H | -1.650281 | 1.928743  | -1.941080 |
| H | -1.320428 | 3.759497  | -1.750561 |
| H | 3.295660  | 1.366341  | -1.144919 |
| H | 1.805547  | 1.431355  | 1.524219  |
| H | 4.028348  | 1.894343  | 0.377787  |
| H | 1.018519  | -2.412326 | -1.973657 |
| H | -0.389041 | -1.355503 | -1.653908 |
| H | -0.447164 | -3.087558 | -1.291592 |
| H | 3.946048  | -3.251831 | -1.900817 |
| H | -3.782213 | 0.146847  | -1.162485 |

|   |           |           |           |
|---|-----------|-----------|-----------|
| H | -3.363766 | -1.554096 | -1.058405 |
| H | -4.759272 | -1.716817 | 1.054750  |
| H | -4.749770 | 0.682782  | 1.698142  |
| H | -5.694012 | 1.083738  | 0.245442  |
| H | -6.410183 | 0.093212  | 1.525428  |
| H | -6.956438 | -1.723305 | -0.159621 |
| H | -5.678653 | -2.436900 | -1.157955 |
| H | -6.232001 | -0.782552 | -1.471149 |

M062X energy = -1154.58651366 a.u.

(2R,6R,7S,8S)-1, Conf. D

|   |           |           |           |
|---|-----------|-----------|-----------|
| C | 1.848128  | -3.319969 | -0.363745 |
| C | 2.468454  | -1.997343 | -0.731081 |
| C | 3.109376  | -1.168311 | 0.094509  |
| C | 3.516498  | -1.542732 | 1.495988  |
| C | -0.099612 | -1.816039 | 0.247037  |
| C | 0.601917  | -3.111895 | 0.566484  |
| C | 2.307878  | 1.199356  | 0.355172  |
| C | 0.880979  | 1.176206  | -0.276322 |
| C | -0.174055 | 0.679231  | 0.735537  |
| C | 0.066287  | -0.772837 | 1.069688  |
| O | 2.796109  | 2.545148  | 0.245492  |
| C | 1.910893  | 3.379500  | -0.348680 |
| C | 0.688958  | 2.603082  | -0.712290 |
| O | 2.134399  | 4.543548  | -0.528893 |
| C | -0.326613 | 3.197364  | -1.331413 |
| C | 3.344504  | 0.270157  | -0.296258 |
| C | -0.774557 | -1.768455 | -1.099061 |
| O | 1.492299  | -3.940320 | -1.589185 |
| O | -1.468801 | 0.906205  | 0.161617  |
| C | -2.494707 | 0.909047  | 1.046745  |
| O | -2.339596 | 0.783746  | 2.234150  |
| C | -3.820113 | 1.024190  | 0.339271  |
| C | -4.138445 | -0.257686 | -0.451996 |
| C | -4.049675 | -1.489765 | 0.449439  |
| C | -5.520406 | -0.141435 | -1.092059 |
| H | 2.565772  | -3.954395 | 0.178152  |
| H | 2.212055  | -1.656209 | -1.734407 |
| H | 3.402910  | -2.611728 | 1.691853  |
| H | 2.927141  | -1.003931 | 2.248853  |
| H | 0.944131  | -3.099649 | 1.606947  |
| H | -0.058021 | -3.982757 | 0.446373  |
| H | 4.565613  | -1.277463 | 1.669692  |
| H | 0.870736  | 0.496687  | -1.137482 |
| H | -0.106921 | 1.282814  | 1.646644  |
| H | 0.566807  | -0.943831 | 2.021415  |
| H | -1.222787 | 2.660106  | -1.619511 |
| H | -0.254683 | 4.258258  | -1.555754 |
| H | 3.294866  | 0.399217  | -1.383680 |
| H | 2.248737  | 0.984870  | 1.429251  |
| H | 4.331536  | 0.613518  | 0.035619  |
| H | -0.115800 | -2.184853 | -1.868287 |
| H | -1.085442 | -0.763232 | -1.383280 |
| H | -1.669891 | -2.404705 | -1.083143 |
| H | 1.096045  | -4.799169 | -1.387159 |
| H | -4.582750 | 1.193527  | 1.105047  |

|   |           |           |           |
|---|-----------|-----------|-----------|
| H | -3.799684 | 1.886078  | -0.336934 |
| H | -3.389808 | -0.353026 | -1.248664 |
| H | -3.047261 | -1.612838 | 0.875349  |
| H | -4.756242 | -1.405046 | 1.283499  |
| H | -4.296140 | -2.396978 | -0.112053 |
| H | -6.293472 | -0.047287 | -0.320582 |
| H | -5.749924 | -1.029143 | -1.689520 |
| H | -5.586948 | 0.734551  | -1.745475 |

M062X energy = -1154.58629771 a.u.

(2R,6R,7S,8S)-1, Conf. E

|   |           |           |           |
|---|-----------|-----------|-----------|
| C | 3.229139  | -2.599348 | 0.382675  |
| C | 3.450827  | -1.103924 | 0.310959  |
| C | 3.276393  | -0.302399 | -0.745254 |
| C | 3.074781  | -0.777877 | -2.158044 |
| C | 0.808740  | -1.900779 | 0.725728  |
| C | 1.727521  | -2.964494 | 0.182232  |
| C | 1.911797  | 1.546395  | 0.300145  |
| C | 0.541367  | 1.425800  | -0.434817 |
| C | -0.328938 | 0.307355  | 0.172794  |
| C | 0.281484  | -1.024042 | -0.133193 |
| O | 2.040617  | 2.910896  | 0.727122  |
| C | 0.948910  | 3.657957  | 0.442205  |
| C | -0.038448 | 2.807399  | -0.286471 |
| O | 0.853407  | 4.813953  | 0.745377  |
| C | -1.192642 | 3.322522  | -0.699728 |
| C | 3.168045  | 1.193451  | -0.508606 |
| C | 0.695891  | -1.792966 | 2.222041  |
| O | 3.930235  | -3.352055 | -0.596599 |
| O | -1.623735 | 0.412771  | -0.445529 |
| C | -2.633199 | -0.174150 | 0.230130  |
| O | -2.483810 | -0.737671 | 1.286188  |
| C | -3.949591 | 0.011233  | -0.488401 |
| C | -5.045059 | -0.928406 | 0.015060  |
| C | -6.396107 | -0.519132 | -0.569349 |
| C | -4.717509 | -2.380679 | -0.331941 |
| H | 3.533313  | -2.931352 | 1.386798  |
| H | 3.592348  | -0.625218 | 1.282035  |
| H | 2.120840  | -0.412020 | -2.559347 |
| H | 3.107936  | -1.865177 | -2.236711 |
| H | 1.546657  | -3.943825 | 0.639201  |
| H | 1.579373  | -3.068076 | -0.897527 |
| H | 3.857908  | -0.360644 | -2.803765 |
| H | 0.699590  | 1.193303  | -1.496000 |
| H | -0.444011 | 0.476469  | 1.247353  |
| H | 0.416305  | -1.199885 | -1.201493 |
| H | -1.924865 | 2.741064  | -1.247634 |
| H | -1.405346 | 4.365481  | -0.480527 |
| H | 3.150207  | 1.749093  | -1.453922 |
| H | 1.898193  | 0.931928  | 1.209014  |
| H | 4.025272  | 1.561271  | 0.065752  |
| H | 1.598807  | -1.340420 | 2.655847  |
| H | 0.599728  | -2.790848 | 2.662860  |
| H | -0.174934 | -1.207452 | 2.524224  |
| H | 4.859976  | -3.085976 | -0.554121 |
| H | -4.240688 | 1.061220  | -0.344256 |

|   |           |           |           |
|---|-----------|-----------|-----------|
| H | -3.781604 | -0.116087 | -1.564770 |
| H | -5.082372 | -0.834081 | 1.106837  |
| H | -7.191488 | -1.179212 | -0.210009 |
| H | -6.658660 | 0.508337  | -0.296447 |
| H | -6.379071 | -0.583142 | -1.664096 |
| H | -5.491431 | -3.054752 | 0.048009  |
| H | -3.760869 | -2.685249 | 0.101267  |
| H | -4.665226 | -2.511410 | -1.420032 |

M062X energy = -1154.58625349 a.u.

(2R,6R,7S,8S)-1, Conf. F

|   |           |           |           |
|---|-----------|-----------|-----------|
| C | 3.785519  | -1.939076 | -0.296911 |
| C | 3.506720  | -0.490728 | -0.620701 |
| C | 3.489604  | 0.526439  | 0.243204  |
| C | 3.969930  | 0.412528  | 1.666577  |
| C | 1.288409  | -1.940279 | 0.116814  |
| C | 2.603512  | -2.573841 | 0.498413  |
| C | 1.407310  | 1.923435  | 0.445514  |
| C | 0.318056  | 1.103068  | -0.311975 |
| C | -0.291345 | 0.003706  | 0.584602  |
| C | 0.755504  | -1.024347 | 0.933173  |
| O | 1.006746  | 3.301396  | 0.400208  |
| C | -0.165940 | 3.487165  | -0.250533 |
| C | -0.662743 | 2.164398  | -0.731096 |
| O | -0.668902 | 4.566846  | -0.388618 |
| C | -1.799988 | 2.080241  | -1.415683 |
| C | 2.832720  | 1.834409  | -0.124556 |
| C | 0.789567  | -2.288774 | -1.261098 |
| O | 3.940028  | -2.702176 | -1.485646 |
| O | -1.408777 | -0.545158 | -0.126459 |
| C | -2.311343 | -1.202795 | 0.634002  |
| O | -2.203940 | -1.327160 | 1.827571  |
| C | -3.481936 | -1.703142 | -0.176433 |
| C | -4.784800 | -1.067176 | 0.333082  |
| C | -4.757355 | 0.449019  | 0.139758  |
| C | -5.988938 | -1.688382 | -0.370517 |
| H | 4.690579  | -2.038010 | 0.320929  |
| H | 3.111687  | -0.329237 | -1.625870 |
| H | 3.135267  | 0.469037  | 2.377111  |
| H | 4.644931  | 1.241355  | 1.908721  |
| H | 2.788655  | -2.424171 | 1.567189  |
| H | 2.628825  | -3.650142 | 0.292686  |
| H | 4.498928  | -0.524032 | 1.856879  |
| H | 0.764254  | 0.612026  | -1.186085 |
| H | -0.678564 | 0.461933  | 1.501537  |
| H | 1.215235  | -0.881006 | 1.910127  |
| H | -2.182480 | 1.136812  | -1.787912 |
| H | -2.364453 | 2.988923  | -1.608157 |
| H | 2.781936  | 1.962141  | -1.212137 |
| H | 1.419050  | 1.644792  | 1.506233  |
| H | 3.391559  | 2.684029  | 0.285473  |
| H | 1.612697  | -2.238279 | -1.981643 |
| H | -0.035153 | -1.658541 | -1.592717 |
| H | 0.444193  | -3.330543 | -1.268572 |
| H | 4.656916  | -2.304138 | -2.000229 |
| H | -3.330132 | -1.479797 | -1.237703 |

|   |           |           |           |
|---|-----------|-----------|-----------|
| H | -3.527271 | -2.791186 | -0.055191 |
| H | -4.845481 | -1.283324 | 1.406785  |
| H | -3.899119 | 0.909989  | 0.641805  |
| H | -4.697626 | 0.698693  | -0.927119 |
| H | -5.665741 | 0.909631  | 0.539829  |
| H | -6.923286 | -1.258593 | 0.003565  |
| H | -6.027697 | -2.771409 | -0.215623 |
| H | -5.943718 | -1.502120 | -1.450173 |

M062X energy = -1154.58621433 a.u.

(2R,6R,7S,8S)-1, Conf. G

|   |           |           |           |
|---|-----------|-----------|-----------|
| C | 3.618107  | -2.244917 | 0.439016  |
| C | 3.610402  | -0.731747 | 0.417933  |
| C | 3.394306  | 0.072266  | -0.628592 |
| C | 3.374259  | -0.377815 | -2.063754 |
| C | 1.101561  | -1.932138 | 0.635627  |
| C | 2.205184  | -2.826839 | 0.131395  |
| C | 1.696439  | 1.659195  | 0.359033  |
| C | 0.412302  | 1.354116  | -0.473012 |
| C | -0.314503 | 0.102025  | 0.058499  |
| C | 0.507456  | -1.113052 | -0.236724 |
| O | 1.585426  | 3.013563  | 0.822226  |
| C | 0.415913  | 3.596514  | 0.470081  |
| C | -0.377404 | 2.629136  | -0.344523 |
| O | 0.124689  | 4.715791  | 0.786400  |
| C | -1.562685 | 2.979234  | -0.835069 |
| C | 3.042863  | 1.525987  | -0.365053 |
| C | 0.874018  | -1.898023 | 2.122076  |
| O | 4.484002  | -2.850711 | -0.509436 |
| O | -1.575551 | 0.032229  | -0.629723 |
| C | -2.524366 | -0.710384 | -0.021617 |
| O | -2.359162 | -1.254296 | 1.042405  |
| C | -3.781717 | -0.773727 | -0.857513 |
| C | -4.978218 | -1.357741 | -0.106984 |
| C | -5.425080 | -0.428408 | 1.021675  |
| C | -6.127063 | -1.621035 | -1.079339 |
| H | 3.907097  | -2.560388 | 1.452896  |
| H | 3.603727  | -0.272141 | 1.408554  |
| H | 3.590817  | -1.441893 | -2.164386 |
| H | 4.121593  | 0.183905  | -2.638405 |
| H | 2.147465  | -3.836590 | 0.552921  |
| H | 2.143126  | -2.916232 | -0.958069 |
| H | 2.403799  | -0.158767 | -2.527499 |
| H | 0.672740  | 1.174037  | -1.524067 |
| H | -0.511806 | 0.221822  | 1.127567  |
| H | 0.742056  | -1.228137 | -1.295956 |
| H | -2.157594 | 2.311967  | -1.447516 |
| H | -1.944966 | 3.972425  | -0.614849 |
| H | 3.004620  | 2.103958  | -1.296240 |
| H | 1.714280  | 1.022128  | 1.252179  |
| H | 3.793449  | 1.999265  | 0.277392  |
| H | 0.874653  | -2.917070 | 2.523475  |
| H | -0.081765 | -1.436596 | 2.379162  |
| H | 1.682228  | -1.356155 | 2.633012  |
| H | 5.361348  | -2.458645 | -0.392713 |
| H | -4.003938 | 0.235527  | -1.227748 |

|   |           |           |           |
|---|-----------|-----------|-----------|
| H | -3.540483 | -1.375511 | -1.743960 |
| H | -4.656469 | -2.308144 | 0.335598  |
| H | -6.275847 | -0.857191 | 1.560324  |
| H | -4.618885 | -0.260055 | 1.739928  |
| H | -5.741090 | 0.541079  | 0.616732  |
| H | -6.986307 | -2.053993 | -0.558035 |
| H | -5.831393 | -2.310924 | -1.876671 |
| H | -6.458338 | -0.686171 | -1.547527 |

M062X energy = -1154.58617978 a.u.

(2R,6R,7S,8S)-1, Conf. H

|   |           |           |           |
|---|-----------|-----------|-----------|
| C | 2.991253  | -2.625664 | 0.363792  |
| C | 3.248584  | -1.154603 | 0.117160  |
| C | 2.941272  | -0.442334 | -0.971943 |
| C | 2.506842  | -1.033193 | -2.285263 |
| C | 0.685128  | -1.784136 | 1.020395  |
| C | 1.465203  | -2.933358 | 0.435689  |
| C | 1.836302  | 1.568622  | 0.089880  |
| C | 0.356537  | 1.452534  | -0.392753 |
| C | -0.433758 | 0.434022  | 0.451459  |
| C | 0.073622  | -0.946959 | 0.176719  |
| O | 2.086754  | 2.959378  | 0.342771  |
| C | 0.988273  | 3.731951  | 0.174287  |
| C | -0.142991 | 2.868076  | -0.275829 |
| O | 0.989486  | 4.915388  | 0.365931  |
| C | -1.339202 | 3.398354  | -0.512653 |
| C | 2.927057  | 1.072473  | -0.869642 |
| C | 0.807614  | -1.554455 | 2.501901  |
| O | 3.499754  | -3.494233 | -0.638086 |
| O | -1.808183 | 0.531539  | 0.040506  |
| C | -2.704259 | 0.011738  | 0.910768  |
| O | -2.403807 | -0.393512 | 2.005390  |
| C | -4.079782 | -0.038984 | 0.297794  |
| C | -4.112003 | -1.009233 | -0.896977 |
| C | -3.620574 | -2.396704 | -0.482747 |
| C | -5.522882 | -1.074989 | -1.477569 |
| H | 3.440746  | -2.882797 | 1.334727  |
| H | 3.556394  | -0.599343 | 1.005499  |
| H | 2.487029  | -2.123263 | -2.260369 |
| H | 3.195999  | -0.717419 | -3.078768 |
| H | 1.325354  | -3.861994 | 1.000158  |
| H | 1.142754  | -3.116826 | -0.594372 |
| H | 1.516699  | -0.656948 | -2.572884 |
| H | 0.323798  | 1.124186  | -1.439926 |
| H | -0.366488 | 0.703220  | 1.509330  |
| H | 0.037447  | -1.213343 | -0.881049 |
| H | -2.180151 | 2.805101  | -0.851906 |
| H | -1.475512 | 4.465478  | -0.358662 |
| H | 2.775506  | 1.538390  | -1.850688 |
| H | 1.950292  | 1.047710  | 1.048767  |
| H | 3.880025  | 1.446256  | -0.479796 |
| H | 1.786408  | -1.123172 | 2.755911  |
| H | 0.734814  | -2.508199 | 3.035162  |
| H | 0.020975  | -0.897271 | 2.878458  |
| H | 4.433051  | -3.272130 | -0.766632 |
| H | -4.773895 | -0.367178 | 1.077080  |

|   |           |           |           |
|---|-----------|-----------|-----------|
| H | -4.368156 | 0.966455  | -0.030078 |
| H | -3.432490 | -0.611525 | -1.661022 |
| H | -3.661307 | -3.090055 | -1.328631 |
| H | -2.588141 | -2.371356 | -0.115881 |
| H | -4.249479 | -2.802297 | 0.318591  |
| H | -5.553202 | -1.730105 | -2.353736 |
| H | -5.878632 | -0.085152 | -1.781633 |
| H | -6.225297 | -1.473849 | -0.736544 |

M062X energy = -1154.58610302 a.u.

(2R,6R,7S,8S)-1, Conf. I

|   |           |           |           |
|---|-----------|-----------|-----------|
| C | 1.948937  | -3.311139 | -0.344194 |
| C | 2.590989  | -1.984619 | -0.654115 |
| C | 3.167722  | -1.160705 | 0.222249  |
| C | 3.472087  | -1.543782 | 1.647027  |
| C | -0.050585 | -1.830164 | 0.147466  |
| C | 0.649376  | -3.115854 | 0.510814  |
| C | 2.344257  | 1.203448  | 0.438298  |
| C | 0.965829  | 1.184007  | -0.293505 |
| C | -0.157747 | 0.671839  | 0.632710  |
| C | 0.070674  | -0.781294 | 0.970449  |
| O | 2.837896  | 2.549908  | 0.373552  |
| C | 1.995906  | 3.388763  | -0.274629 |
| C | 0.801560  | 2.615873  | -0.726230 |
| O | 2.231308  | 4.553973  | -0.430544 |
| C | -0.172120 | 3.219018  | -1.401657 |
| C | 3.427089  | 0.280268  | -0.142349 |
| C | -0.664377 | -1.807208 | -1.227978 |
| O | 1.666625  | -3.911564 | -1.598302 |
| O | -1.402894 | 0.895628  | -0.042196 |
| C | -2.500334 | 0.825475  | 0.742200  |
| O | -2.450486 | 0.644927  | 1.932493  |
| C | -3.777355 | 0.965637  | -0.050812 |
| C | -4.744412 | -0.175270 | 0.294007  |
| C | -6.074988 | 0.019481  | -0.428309 |
| C | -4.119909 | -1.527237 | -0.052371 |
| H | 2.631945  | -3.954817 | 0.230965  |
| H | 2.411659  | -1.637376 | -1.671817 |
| H | 3.352871  | -2.615382 | 1.823884  |
| H | 2.824175  | -1.016049 | 2.358721  |
| H | 0.930385  | -3.099134 | 1.569566  |
| H | 0.008441  | -3.995280 | 0.354778  |
| H | 4.503355  | -1.272550 | 1.900279  |
| H | 1.015500  | 0.513349  | -1.160632 |
| H | -0.167235 | 1.267667  | 1.551615  |
| H | 0.532764  | -0.947054 | 1.942373  |
| H | -1.049935 | 2.688609  | -1.751860 |
| H | -0.083178 | 4.282421  | -1.607468 |
| H | 3.455466  | 0.415301  | -1.229817 |
| H | 2.207841  | 0.981017  | 1.503896  |
| H | 4.386847  | 0.624311  | 0.261039  |
| H | 0.079410  | -2.096412 | -1.978912 |
| H | -1.094969 | -0.840922 | -1.489577 |
| H | -1.460429 | -2.560957 | -1.284225 |
| H | 1.243523  | -4.765560 | -1.433655 |
| H | -4.228127 | 1.931172  | 0.208160  |



|   |           |           |           |
|---|-----------|-----------|-----------|
| H | -3.550889 | 0.973518  | -1.122298 |
| H | -4.911400 | -0.136694 | 1.377034  |
| H | -6.535161 | 0.978755  | -0.169939 |
| H | -5.931603 | -0.004757 | -1.515161 |
| H | -6.780011 | -0.775825 | -0.167245 |
| H | -4.798060 | -2.347592 | 0.202608  |
| H | -3.180456 | -1.685378 | 0.490735  |
| H | -3.907917 | -1.586579 | -1.127505 |

M062X energy = -1154.58597757 a.u.

(2R,6R,7S,8S)-1, Conf. J

|   |           |           |           |
|---|-----------|-----------|-----------|
| C | 2.880691  | -2.769859 | 0.435171  |
| C | 3.226990  | -1.309664 | 0.241734  |
| C | 3.048790  | -0.563139 | -0.853505 |
| C | 2.698541  | -1.106671 | -2.211551 |
| C | 0.574461  | -1.826788 | 0.928130  |
| C | 1.340577  | -3.003318 | 0.380196  |
| C | 1.957345  | 1.471126  | 0.168219  |
| C | 0.519722  | 1.437959  | -0.437526 |
| C | -0.387590 | 0.453298  | 0.326821  |
| C | 0.061094  | -0.949849 | 0.060178  |
| O | 2.246810  | 2.840184  | 0.488350  |
| C | 1.207817  | 3.670680  | 0.239048  |
| C | 0.085379  | 2.875927  | -0.341262 |
| O | 1.247108  | 4.847852  | 0.462983  |
| C | -1.049475 | 3.473552  | -0.692064 |
| C | 3.098153  | 0.948512  | -0.715852 |
| C | 0.603039  | -1.626668 | 2.418795  |
| O | 3.425514  | -3.645365 | -0.541083 |
| O | -1.722635 | 0.641606  | -0.174304 |
| C | -2.705914 | 0.202402  | 0.638401  |
| O | -2.506699 | -0.252613 | 1.738103  |
| C | -4.062737 | 0.293568  | -0.012951 |
| C | -4.646069 | -1.118074 | -0.195156 |
| C | -6.037214 | -1.033364 | -0.817943 |
| C | -3.711434 | -1.984207 | -1.040784 |
| H | 3.237409  | -3.065871 | 1.433228  |
| H | 3.485022  | -0.785805 | 1.164286  |
| H | 3.462074  | -0.803580 | -2.939262 |
| H | 1.751023  | -0.683188 | -2.569243 |
| H | 1.112856  | -3.933312 | 0.913004  |
| H | 1.090964  | -3.152476 | -0.675402 |
| H | 2.632672  | -2.195110 | -2.215273 |
| H | 0.556612  | 1.121463  | -1.487968 |
| H | -0.379760 | 0.699630  | 1.392191  |
| H | 0.086306  | -1.198317 | -1.002172 |
| H | -1.878901 | 2.932342  | -1.131876 |
| H | -1.145875 | 4.544065  | -0.531346 |
| H | 3.045365  | 1.441481  | -1.694087 |
| H | 1.968209  | 0.917440  | 1.115277  |
| H | 4.033645  | 1.268098  | -0.243891 |
| H | -0.172821 | -0.934580 | 2.752612  |
| H | 1.582292  | -1.252770 | 2.749360  |
| H | 0.443171  | -2.583796 | 2.926435  |
| H | 4.375948  | -3.468562 | -0.590293 |
| H | -4.713951 | 0.884838  | 0.639406  |

|   |           |           |           |
|---|-----------|-----------|-----------|
| H | -3.980055 | 0.799927  | -0.980051 |
| H | -4.724860 | -1.562716 | 0.804468  |
| H | -6.480765 | -2.028500 | -0.920312 |
| H | -6.711293 | -0.421529 | -0.209810 |
| H | -5.983886 | -0.586147 | -1.817752 |
| H | -4.133440 | -2.983692 | -1.184135 |
| H | -2.729522 | -2.099322 | -0.567739 |
| H | -3.562228 | -1.535854 | -2.030627 |

M062X energy = -1154.58594655 a.u.

(2R,6R,7S,8S)-1, Conf. K

|   |           |           |           |
|---|-----------|-----------|-----------|
| C | 2.106843  | -3.233682 | -0.238964 |
| C | 2.702219  | -1.870946 | -0.505161 |
| C | 3.154985  | -1.010770 | 0.409172  |
| C | 3.352266  | -1.370632 | 1.858409  |
| C | 0.003760  | -1.851792 | 0.029193  |
| C | 0.710361  | -3.117451 | 0.446815  |
| C | 2.169965  | 1.298387  | 0.534001  |
| C | 0.863953  | 1.192296  | -0.314617 |
| C | -0.299623 | 0.625447  | 0.528343  |
| C | -0.032950 | -0.818515 | 0.880040  |
| O | 2.585069  | 2.672128  | 0.501193  |
| C | 1.758061  | 3.454196  | -0.232226 |
| C | 0.658009  | 2.607646  | -0.780352 |
| O | 1.939094  | 4.629747  | -0.382717 |
| C | -0.280969 | 3.143915  | -1.554233 |
| C | 3.355294  | 0.443055  | 0.057699  |
| C | -0.439021 | -1.815608 | -1.409448 |
| O | 1.907606  | -3.942508 | -1.453890 |
| O | -1.513229 | 0.802714  | -0.216166 |
| C | -2.642920 | 0.825360  | 0.528406  |
| O | -2.637809 | 0.718910  | 1.729633  |
| C | -3.879189 | 0.957783  | -0.326769 |
| C | -4.714083 | -0.340933 | -0.306232 |
| C | -3.858744 | -1.536569 | -0.726467 |
| C | -5.372884 | -0.582556 | 1.051608  |
| H | 2.753778  | -3.823131 | 0.427896  |
| H | 2.574537  | -1.519754 | -1.530720 |
| H | 4.330163  | -1.020922 | 2.208190  |
| H | 3.294674  | -2.447734 | 2.031916  |
| H | 0.854885  | -3.119226 | 1.532250  |
| H | 0.153294  | -4.020885 | 0.173662  |
| H | 2.599423  | -0.892883 | 2.497983  |
| H | 1.029155  | 0.518275  | -1.164114 |
| H | -0.391306 | 1.214922  | 1.446307  |
| H | 0.314916  | -0.980981 | 1.899029  |
| H | -1.088141 | 2.557379  | -1.977695 |
| H | -0.236823 | 4.208386  | -1.768528 |
| H | 3.470307  | 0.577992  | -1.024187 |
| H | 1.955355  | 1.070566  | 1.585298  |
| H | 4.252644  | 0.846970  | 0.541295  |
| H | -0.863246 | -0.854703 | -1.701803 |
| H | -1.198789 | -2.589375 | -1.574610 |
| H | 0.396363  | -2.072722 | -2.069873 |
| H | 2.763818  | -4.008173 | -1.900853 |
| H | -4.472679 | 1.786425  | 0.073387  |

|   |           |           |           |
|---|-----------|-----------|-----------|
| H | -3.583786 | 1.199510  | -1.351433 |
| H | -5.506405 | -0.202738 | -1.052910 |
| H | -3.401057 | -1.374798 | -1.708177 |
| H | -3.051486 | -1.708867 | -0.002151 |
| H | -4.462269 | -2.448212 | -0.776071 |
| H | -6.005236 | -1.475316 | 1.011826  |
| H | -6.000047 | 0.266054  | 1.343376  |
| H | -4.619894 | -0.725750 | 1.830976  |

M062X energy = -1154.58591732 a.u.

(2R,6R,7S,8S)-1, Conf. L

|   |           |           |           |
|---|-----------|-----------|-----------|
| C | -4.083995 | -1.458867 | -0.249511 |
| C | -3.687212 | 0.000060  | -0.188195 |
| C | -3.157324 | 0.663347  | 0.844893  |
| C | -3.092061 | 0.141431  | 2.254116  |
| C | -1.606741 | -1.774478 | -0.732523 |
| C | -2.841934 | -2.392405 | -0.127847 |
| C | -1.225513 | 1.806314  | -0.300877 |
| C | 0.020443  | 1.154155  | 0.376684  |
| C | 0.348778  | -0.211169 | -0.262650 |
| C | -0.728049 | -1.190874 | 0.087082  |
| O | -0.821386 | 3.102352  | -0.767813 |
| C | 0.485258  | 3.362686  | -0.533856 |
| C | 1.083907  | 2.202572  | 0.190635  |
| O | 1.017406  | 4.383447  | -0.869177 |
| C | 2.354882  | 2.239609  | 0.579143  |
| C | -2.472253 | 1.991364  | 0.574842  |
| C | -1.544320 | -1.704136 | -2.233669 |
| O | -4.969454 | -1.879309 | 0.778039  |
| O | 1.605975  | -0.650312 | 0.284166  |
| C | 2.219411  | -1.623079 | -0.429617 |
| O | 1.799385  | -2.031169 | -1.483236 |
| C | 3.467271  | -2.121080 | 0.259463  |
| C | 4.417911  | -1.003878 | 0.708287  |
| C | 5.662234  | -1.608959 | 1.356503  |
| C | 4.794983  | -0.102661 | -0.466939 |
| H | -4.551381 | -1.633439 | -1.230226 |
| H | -3.673572 | 0.499895  | -1.159034 |
| H | -2.052706 | 0.090468  | 2.603586  |
| H | -3.554336 | -0.841550 | 2.350409  |
| H | -3.088484 | -3.358024 | -0.583380 |
| H | -2.688350 | -2.558344 | 0.943410  |
| H | -3.608322 | 0.834746  | 2.930264  |
| H | -0.170195 | 0.991431  | 1.445174  |
| H | 0.466833  | -0.088851 | -1.342986 |
| H | -0.867666 | -1.308269 | 1.162940  |
| H | 2.817786  | 1.429767  | 1.130714  |
| H | 2.949971  | 3.115991  | 0.336180  |
| H | -2.184329 | 2.492696  | 1.506799  |
| H | -1.508056 | 1.228579  | -1.189227 |
| H | -3.138457 | 2.672195  | 0.033923  |
| H | -1.852512 | -2.662591 | -2.665131 |
| H | -0.537148 | -1.482666 | -2.592662 |
| H | -2.237920 | -0.945084 | -2.622205 |
| H | -5.722793 | -1.271455 | 0.778043  |
| H | 3.154564  | -2.714273 | 1.128127  |

|   |          |           |           |
|---|----------|-----------|-----------|
| H | 3.966383 | -2.794345 | -0.444188 |
| H | 3.891928 | -0.404989 | 1.462526  |
| H | 6.339911 | -0.824391 | 1.706962  |
| H | 5.401864 | -2.240569 | 2.211974  |
| H | 6.209608 | -2.226203 | 0.634644  |
| H | 5.468150 | 0.698588  | -0.145189 |
| H | 3.912334 | 0.363086  | -0.919199 |
| H | 5.307445 | -0.682175 | -1.243860 |

M062X energy = -1154.58585902 a.u.

(2R,6R,7S,8S)-1, Conf. M

|   |           |           |           |
|---|-----------|-----------|-----------|
| C | -1.990560 | -3.258219 | -0.585764 |
| C | -2.693745 | -1.925154 | -0.486296 |
| C | -2.926607 | -1.115732 | 0.553841  |
| C | -2.758722 | -1.435583 | 2.018236  |
| C | 0.079912  | -1.800320 | -0.611357 |
| C | -0.567522 | -3.039648 | -1.182066 |
| C | -2.263041 | 1.075872  | -0.520859 |
| C | -0.869453 | 1.142805  | 0.165303  |
| C | 0.257036  | 0.735167  | -0.807117 |
| C | 0.045814  | -0.668407 | -1.324506 |
| O | -2.698774 | 2.430603  | -0.711566 |
| C | -1.924301 | 3.319094  | -0.040765 |
| C | -0.784531 | 2.582388  | 0.584820  |
| O | -2.164729 | 4.492755  | 0.000117  |
| C | 0.106124  | 3.212185  | 1.344287  |
| C | -3.336892 | 0.324207  | 0.275336  |
| C | 0.565645  | -1.918926 | 0.807223  |
| O | -1.834766 | -3.963345 | 0.634016  |
| O | 1.490069  | 0.893827  | -0.090872 |
| C | 2.598145  | 0.958093  | -0.867286 |
| O | 2.559198  | 0.936296  | -2.070337 |
| C | 3.847847  | 0.997040  | -0.025828 |
| C | 4.058493  | -0.333560 | 0.719140  |
| C | 4.025667  | -1.512524 | -0.253643 |
| C | 5.375342  | -0.292796 | 1.491902  |
| H | -2.538560 | -3.892758 | -1.299621 |
| H | -2.892359 | -1.511156 | -1.478416 |
| H | -3.719723 | -1.304870 | 2.531926  |
| H | -2.065132 | -0.724702 | 2.485815  |
| H | -0.663890 | -2.941343 | -2.268093 |
| H | 0.006483  | -3.949015 | -0.971118 |
| H | -2.388344 | -2.441138 | 2.203462  |
| H | -0.832195 | 0.463785  | 1.022892  |
| H | 0.269861  | 1.431353  | -1.652874 |
| H | -0.319073 | -0.720883 | -2.349101 |
| H | 0.941043  | 2.692426  | 1.801916  |
| H | -0.002027 | 4.280521  | 1.510902  |
| H | -3.498687 | 0.862249  | 1.217774  |
| H | -2.180711 | 0.639007  | -1.520105 |
| H | -4.275613 | 0.380740  | -0.286532 |
| H | 0.925504  | -0.972184 | 1.211036  |
| H | 1.390700  | -2.642102 | 0.850723  |
| H | -0.227793 | -2.321579 | 1.444990  |
| H | -2.719667 | -4.190397 | 0.954646  |
| H | 4.686467  | 1.189888  | -0.701401 |

|   |          |           |           |
|---|----------|-----------|-----------|
| H | 3.777317 | 1.820950  | 0.693184  |
| H | 3.235289 | -0.448412 | 1.436038  |
| H | 4.190218 | -2.456385 | 0.276263  |
| H | 3.066582 | -1.580283 | -0.779995 |
| H | 4.812223 | -1.406230 | -1.010120 |
| H | 5.522627 | -1.216452 | 2.060218  |
| H | 5.402467 | 0.546671  | 2.194280  |
| H | 6.221104 | -0.184680 | 0.802827  |

M062X energy = -1154.58571760 a.u.

(2R,6R,7S,8S)-1, Conf. N

|   |           |           |           |
|---|-----------|-----------|-----------|
| C | 2.697059  | -2.866060 | -0.374965 |
| C | 2.898173  | -1.508198 | -0.978696 |
| C | 3.145820  | -0.396616 | -0.279964 |
| C | 3.572716  | -0.402373 | 1.169913  |
| C | 0.547849  | -1.959854 | 0.636058  |
| C | 1.175967  | -3.091703 | -0.142791 |
| C | 1.846677  | 1.763732  | -0.061858 |
| C | 0.335233  | 1.568411  | -0.378317 |
| C | -0.343895 | 0.444063  | 0.417382  |
| C | 0.116139  | -0.900392 | -0.057554 |
| O | 2.108564  | 3.156643  | -0.309062 |
| C | 0.976647  | 3.894846  | -0.220331 |
| C | -0.190514 | 2.964490  | -0.134424 |
| O | 0.977244  | 5.093460  | -0.227726 |
| C | -1.403899 | 3.455987  | 0.099286  |
| C | 2.896576  | 0.974432  | -0.859262 |
| C | 0.573929  | -2.080978 | 2.133669  |
| O | 3.100800  | -3.921318 | -1.230216 |
| O | -1.757062 | 0.562106  | 0.139380  |
| C | -2.575761 | -0.099824 | 0.987794  |
| O | -2.187705 | -0.655491 | 1.984363  |
| C | -3.998157 | -0.075529 | 0.488661  |
| C | -4.133741 | -0.819554 | -0.851789 |
| C | -3.599272 | -2.247356 | -0.736166 |
| C | -5.592348 | -0.811898 | -1.304388 |
| H | 3.208932  | -2.941592 | 0.595488  |
| H | 2.579967  | -1.427475 | -2.019904 |
| H | 4.139436  | -1.298122 | 1.432520  |
| H | 2.710057  | -0.350665 | 1.846427  |
| H | 1.056018  | -4.056402 | 0.362405  |
| H | 0.722415  | -3.178925 | -1.136163 |
| H | 4.202751  | 0.467985  | 1.385193  |
| H | 0.228776  | 1.338505  | -1.449295 |
| H | -0.190282 | 0.590990  | 1.491129  |
| H | 0.137157  | -0.973435 | -1.146465 |
| H | -2.289890 | 2.837608  | 0.152770  |
| H | -1.503238 | 4.529940  | 0.233862  |
| H | 2.593665  | 0.916216  | -1.910674 |
| H | 2.000215  | 1.601923  | 1.013522  |
| H | 3.812785  | 1.577148  | -0.810619 |
| H | 0.277679  | -1.163321 | 2.642950  |
| H | 1.570878  | -2.383278 | 2.478001  |
| H | -0.125472 | -2.864582 | 2.447208  |
| H | 4.036277  | -3.788641 | -1.437819 |
| H | -4.619944 | -0.548176 | 1.254847  |

|   |           |           |           |
|---|-----------|-----------|-----------|
| H | -4.321581 | 0.965529  | 0.369529  |
| H | -3.529816 | -0.278314 | -1.590605 |
| H | -3.718804 | -2.782326 | -1.683414 |
| H | -2.536129 | -2.263087 | -0.470243 |
| H | -4.145824 | -2.799921 | 0.037202  |
| H | -5.701038 | -1.297412 | -2.279075 |
| H | -5.981365 | 0.208097  | -1.388356 |
| H | -6.219541 | -1.355214 | -0.587880 |

M062X energy = -1154.58565988 a.u.

(2R,6R,7S,8S)-1, Conf. O

|   |           |           |           |
|---|-----------|-----------|-----------|
| C | 2.578757  | -2.924079 | 0.485399  |
| C | 3.033105  | -1.489992 | 0.322291  |
| C | 2.949743  | -0.722700 | -0.769545 |
| C | 2.616048  | -1.226300 | -2.147011 |
| C | 0.325816  | -1.825830 | 0.903472  |
| C | 1.028956  | -3.048830 | 0.372915  |
| C | 1.971057  | 1.378422  | 0.236430  |
| C | 0.558084  | 1.454475  | -0.420032 |
| C | -0.443071 | 0.524873  | 0.293933  |
| C | -0.075805 | -0.901313 | 0.026028  |
| O | 2.348834  | 2.720519  | 0.577573  |
| C | 1.381040  | 3.626169  | 0.303072  |
| C | 0.223153  | 2.918737  | -0.319504 |
| O | 1.497933  | 4.795657  | 0.539581  |
| C | -0.855630 | 3.599078  | -0.695209 |
| C | 3.101754  | 0.780334  | -0.612339 |
| C | 0.297119  | -1.646913 | 2.396853  |
| O | 3.096287  | -3.825977 | -0.481710 |
| O | -1.741068 | 0.808172  | -0.256987 |
| C | -2.785015 | 0.406453  | 0.501067  |
| O | -2.656462 | -0.075666 | 1.600531  |
| C | -4.096570 | 0.585414  | -0.220491 |
| C | -4.583254 | -0.755239 | -0.816457 |
| C | -3.518804 | -1.380942 | -1.719655 |
| C | -5.017534 | -1.733900 | 0.273931  |
| H | 2.877741  | -3.253875 | 1.491766  |
| H | 3.291057  | -0.994080 | 1.260234  |
| H | 1.723201  | -0.723018 | -2.539712 |
| H | 2.461414  | -2.305529 | -2.165000 |
| H | 0.717653  | -3.964067 | 0.888590  |
| H | 0.808374  | -3.173955 | -0.692181 |
| H | 3.432950  | -0.982242 | -2.837951 |
| H | 0.612028  | 1.148830  | -1.473074 |
| H | -0.462663 | 0.757634  | 1.362361  |
| H | -0.009195 | -1.134845 | -1.037853 |
| H | -1.707490 | 3.122256  | -1.165261 |
| H | -0.880607 | 4.671965  | -0.524204 |
| H | 3.119978  | 1.284352  | -1.586275 |
| H | 1.908282  | 0.819984  | 1.178902  |
| H | 4.040349  | 1.027651  | -0.104443 |
| H | 0.052958  | -2.597320 | 2.883075  |
| H | -0.446979 | -0.909547 | 2.705367  |
| H | 1.282489  | -1.341118 | 2.776385  |
| H | 4.058292  | -3.719241 | -0.491348 |
| H | -4.829080 | 0.957883  | 0.501590  |

|   |           |           |           |
|---|-----------|-----------|-----------|
| H | -3.971026 | 1.324374  | -1.016673 |
| H | -5.459199 | -0.510808 | -1.430687 |
| H | -3.923671 | -2.253807 | -2.240813 |
| H | -3.154524 | -0.670267 | -2.468888 |
| H | -2.657591 | -1.716955 | -1.128519 |
| H | -5.401285 | -2.656514 | -0.173059 |
| H | -5.805664 | -1.305557 | 0.901360  |
| H | -4.175677 | -1.991324 | 0.923519  |

M062X energy = -1154.58559931 a.u.

(2R,6R,7S,8S)-1, Conf. P

|   |           |           |           |
|---|-----------|-----------|-----------|
| C | 3.169281  | -2.646326 | -0.248824 |
| C | 3.303175  | -1.178426 | -0.555428 |
| C | 3.526120  | -0.203090 | 0.326602  |
| C | 3.899134  | -0.451232 | 1.764971  |
| C | 0.749448  | -1.980834 | 0.116274  |
| C | 1.843057  | -2.930691 | 0.537080  |
| C | 1.902454  | 1.709461  | 0.471401  |
| C | 0.664653  | 1.209861  | -0.336460 |
| C | -0.259053 | 0.324352  | 0.528254  |
| C | 0.459979  | -0.945408 | 0.911893  |
| O | 1.886849  | 3.144429  | 0.424745  |
| C | 0.840999  | 3.636188  | -0.280285 |
| C | 0.031928  | 2.493955  | -0.798841 |
| O | 0.652656  | 4.810547  | -0.431520 |
| C | -1.042691 | 2.718495  | -1.548983 |
| C | 3.271335  | 1.237489  | -0.044674 |
| C | 0.216964  | -2.199124 | -1.276731 |
| O | 3.193471  | -3.312773 | -1.501466 |
| O | -1.448906 | 0.089439  | -0.235217 |
| C | -2.503994 | -0.387265 | 0.463163  |
| O | -2.482740 | -0.557783 | 1.655143  |
| C | -3.663524 | -0.690512 | -0.456639 |
| C | -4.969677 | -0.965282 | 0.287548  |
| C | -5.477446 | 0.296135  | 0.986222  |
| C | -6.018571 | -1.509310 | -0.681630 |
| H | 4.007370  | -2.996435 | 0.372541  |
| H | 3.036105  | -0.919828 | -1.580489 |
| H | 4.128577  | -1.500937 | 1.962527  |
| H | 3.093931  | -0.154174 | 2.449348  |
| H | 2.044071  | -2.813862 | 1.607651  |
| H | 1.568388  | -3.981348 | 0.366416  |
| H | 4.777831  | 0.144603  | 2.037216  |
| H | 0.998734  | 0.604859  | -1.188732 |
| H | -0.547389 | 0.874673  | 1.430788  |
| H | 0.917127  | -0.917538 | 1.900071  |
| H | -1.645210 | 1.913484  | -1.953253 |
| H | -1.323909 | 3.745866  | -1.764512 |
| H | 3.303442  | 1.379426  | -1.131143 |
| H | 1.797041  | 1.439934  | 1.529565  |
| H | 4.024480  | 1.898629  | 0.400075  |
| H | 1.045703  | -2.363222 | -1.973875 |
| H | -0.404985 | -1.377911 | -1.631760 |
| H | -0.388182 | -3.115324 | -1.295974 |
| H | 3.107184  | -4.262202 | -1.337931 |
| H | -3.779060 | 0.143488  | -1.160903 |

|   |           |           |           |
|---|-----------|-----------|-----------|
| H | -3.364809 | -1.558671 | -1.060459 |
| H | -4.760175 | -1.722610 | 1.052600  |
| H | -4.743937 | 0.675238  | 1.702238  |
| H | -5.686757 | 1.082752  | 0.250565  |
| H | -6.406077 | 0.091041  | 1.527835  |
| H | -6.957795 | -1.719769 | -0.161069 |
| H | -5.682531 | -2.434211 | -1.162089 |
| H | -6.231218 | -0.777433 | -1.470214 |

M062X energy = -1154.58552565 a.u.

(2R,6R,7S,8S)-1, Conf. Q

|   |           |           |           |
|---|-----------|-----------|-----------|
| C | 3.770605  | -1.836011 | -0.264721 |
| C | 3.472101  | -0.379143 | -0.526297 |
| C | 3.405370  | 0.595619  | 0.383192  |
| C | 3.830091  | 0.420015  | 1.817885  |
| C | 1.257275  | -1.911554 | 0.025687  |
| C | 2.566848  | -2.538667 | 0.435747  |
| C | 1.281586  | 1.924809  | 0.556082  |
| C | 0.263323  | 1.115339  | -0.304794 |
| C | -0.383223 | -0.025653 | 0.510760  |
| C | 0.666560  | -1.051002 | 0.861851  |
| O | 0.833092  | 3.288597  | 0.570511  |
| C | -0.289970 | 3.480239  | -0.162317 |
| C | -0.697074 | 2.176882  | -0.763314 |
| O | -0.817307 | 4.550985  | -0.276131 |
| C | -1.742512 | 2.102513  | -1.581354 |
| C | 2.735182  | 1.907715  | 0.054128  |
| C | 0.829605  | -2.196157 | -1.390944 |
| O | 4.004118  | -2.530083 | -1.482788 |
| O | -1.454821 | -0.561182 | -0.277254 |
| C | -2.307167 | -1.372118 | 0.392357  |
| O | -2.201404 | -1.600919 | 1.571138  |
| C | -3.402350 | -1.900883 | -0.501836 |
| C | -4.748567 | -1.191549 | -0.240082 |
| C | -5.277725 | -1.463319 | 1.168071  |
| C | -4.643593 | 0.309106  | -0.511568 |
| H | 4.645997  | -1.947659 | 0.392271  |
| H | 3.111776  | -0.176347 | -1.537301 |
| H | 2.965027  | 0.416956  | 2.493669  |
| H | 4.471072  | 1.251751  | 2.131374  |
| H | 2.697268  | -2.446075 | 1.519122  |
| H | 2.626759  | -3.601089 | 0.172779  |
| H | 4.376106  | -0.511729 | 1.981715  |
| H | 0.779962  | 0.658506  | -1.157237 |
| H | -0.820709 | 0.385953  | 1.427532  |
| H | 1.077263  | -0.948755 | 1.865324  |
| H | -2.042895 | 1.170558  | -2.046668 |
| H | -2.314154 | 3.002678  | -1.791586 |
| H | 2.734998  | 2.095510  | -1.025972 |
| H | 1.252812  | 1.587208  | 1.598941  |
| H | 3.250288  | 2.745324  | 0.538782  |
| H | 1.694464  | -2.144873 | -2.060453 |
| H | 0.044480  | -1.529070 | -1.746847 |
| H | 0.452013  | -3.224804 | -1.456928 |
| H | 4.736534  | -2.089350 | -1.937441 |
| H | -3.108385 | -1.774721 | -1.547809 |

|   |           |           |           |
|---|-----------|-----------|-----------|
| H | -3.505419 | -2.969838 | -0.290177 |
| H | -5.457264 | -1.620228 | -0.960268 |
| H | -5.360684 | -2.537709 | 1.360732  |
| H | -4.612173 | -1.041645 | 1.926323  |
| H | -6.269149 | -1.016342 | 1.292034  |
| H | -5.611468 | 0.797527  | -0.363101 |
| H | -4.319115 | 0.506701  | -1.538754 |
| H | -3.923042 | 0.785293  | 0.164937  |

M062X energy = -1154.58547181 a.u.

(2R,6R,7S,8S)-1, Conf. R

|   |           |           |           |
|---|-----------|-----------|-----------|
| C | 3.502540  | -2.410770 | -0.254717 |
| C | 3.554755  | -0.979671 | -0.698740 |
| C | 3.397840  | 0.070211  | 0.112564  |
| C | 3.464091  | -0.025922 | 1.619084  |
| C | 1.038930  | -2.031817 | 0.264101  |
| C | 2.045776  | -2.932326 | -0.412989 |
| C | 1.680226  | 1.930491  | 0.159073  |
| C | 0.339693  | 1.500376  | -0.502278 |
| C | -0.247855 | 0.178456  | 0.010361  |
| C | 0.574415  | -0.990872 | -0.435369 |
| O | 1.705500  | 3.365445  | 0.049192  |
| C | 0.453129  | 3.870860  | -0.055367 |
| C | -0.498465 | 2.734819  | -0.256581 |
| O | 0.215424  | 5.044146  | 0.004962  |
| C | -1.807806 | 2.957485  | -0.188489 |
| C | 3.013233  | 1.429945  | -0.417135 |
| C | 0.734980  | -2.331716 | 1.705156  |
| O | 4.291630  | -3.272383 | -1.056856 |
| O | -1.554452 | 0.080520  | -0.603215 |
| C | -2.413041 | -0.780997 | -0.023202 |
| O | -2.167774 | -1.383136 | 0.993177  |
| C | -3.693865 | -0.895680 | -0.817584 |
| C | -4.870978 | -1.384480 | 0.026336  |
| C | -5.230766 | -0.356727 | 1.099408  |
| C | -6.072301 | -1.682825 | -0.868722 |
| H | 3.790165  | -2.503653 | 0.802854  |
| H | 3.475834  | -0.840089 | -1.778562 |
| H | 4.123806  | -0.828364 | 1.955767  |
| H | 2.473488  | -0.211463 | 2.054072  |
| H | 2.014122  | -3.954193 | -0.019074 |
| H | 1.855399  | -2.986256 | -1.490388 |
| H | 3.833771  | 0.913287  | 2.045765  |
| H | 0.503780  | 1.401164  | -1.586233 |
| H | -0.379119 | 0.215527  | 1.096629  |
| H | 0.861973  | -0.925737 | -1.486017 |
| H | -2.549676 | 2.182279  | -0.328225 |
| H | -2.143024 | 3.971502  | 0.013125  |
| H | 2.966426  | 1.435019  | -1.511700 |
| H | 1.628353  | 1.697163  | 1.231290  |
| H | 3.758201  | 2.176997  | -0.113122 |
| H | 0.171568  | -3.269830 | 1.769210  |
| H | 0.131486  | -1.561364 | 2.186558  |
| H | 1.662772  | -2.476168 | 2.273168  |
| H | 5.203165  | -2.950160 | -1.022467 |
| H | -3.914383 | 0.072079  | -1.284437 |

|   |           |           |           |
|---|-----------|-----------|-----------|
| H | -3.489493 | -1.593992 | -1.640700 |
| H | -4.554681 | -2.308170 | 0.525280  |
| H | -6.066760 | -0.708237 | 1.711928  |
| H | -4.383737 | -0.164704 | 1.764381  |
| H | -5.532457 | 0.591443  | 0.636445  |
| H | -6.918060 | -2.046892 | -0.277353 |
| H | -5.834689 | -2.440568 | -1.622636 |
| H | -6.398044 | -0.776384 | -1.393109 |

M062X energy = -1154.58541701 a.u.

(2R,6R,7S,8S)-1, Conf. S

|   |           |           |           |
|---|-----------|-----------|-----------|
| C | 2.813497  | -2.958320 | -0.337518 |
| C | 3.162022  | -1.571734 | -0.790206 |
| C | 3.304244  | -0.521470 | 0.023426  |
| C | 3.443865  | -0.641714 | 1.522996  |
| C | 0.537882  | -2.034693 | 0.321029  |
| C | 1.270369  | -3.137747 | -0.406646 |
| C | 2.047932  | 1.671822  | 0.147073  |
| C | 0.622643  | 1.553783  | -0.469238 |
| C | -0.225935 | 0.412547  | 0.113187  |
| C | 0.269491  | -0.918434 | -0.364667 |
| O | 2.389840  | 3.066305  | 0.054713  |
| C | 1.283389  | 3.841133  | -0.036056 |
| C | 0.098360  | 2.954612  | -0.249448 |
| O | 1.316777  | 5.037201  | 0.037270  |
| C | -1.121541 | 3.484441  | -0.247455 |
| C | 3.211996  | 0.895275  | -0.487895 |
| C | 0.283027  | -2.253414 | 1.785895  |
| O | 3.341118  | -3.968469 | -1.180044 |
| O | -1.564772 | 0.615095  | -0.395339 |
| C | -2.547641 | -0.016239 | 0.277189  |
| O | -2.358411 | -0.665400 | 1.276224  |
| C | -3.894253 | 0.234164  | -0.362900 |
| C | -4.976431 | -0.727113 | 0.129163  |
| C | -6.348667 | -0.270351 | -0.363268 |
| C | -4.681855 | -2.156488 | -0.326376 |
| H | 3.134544  | -3.121596 | 0.701575  |
| H | 3.050790  | -1.406774 | -1.863680 |
| H | 4.055020  | 0.178851  | 1.915581  |
| H | 3.912377  | -1.581205 | 1.823776  |
| H | 1.032753  | -4.127935 | -0.002275 |
| H | 1.009228  | -3.141606 | -1.470341 |
| H | 2.469242  | -0.586186 | 2.024327  |
| H | 0.722984  | 1.385486  | -1.551943 |
| H | -0.259967 | 0.483539  | 1.204926  |
| H | 0.487623  | -0.924477 | -1.433814 |
| H | -2.017103 | 2.903672  | -0.422814 |
| H | -1.214336 | 4.552876  | -0.070841 |
| H | 3.120411  | 0.922845  | -1.579333 |
| H | 1.984467  | 1.436643  | 1.218033  |
| H | 4.116957  | 1.454000  | -0.216161 |
| H | 1.192152  | -2.609464 | 2.286555  |
| H | -0.477170 | -3.033379 | 1.910182  |
| H | -0.085315 | -1.362071 | 2.294842  |
| H | 4.302041  | -3.859066 | -1.201565 |
| H | -4.167089 | 1.274321  | -0.135049 |

|   |           |           |           |
|---|-----------|-----------|-----------|
| H | -3.778309 | 0.179213  | -1.452072 |
| H | -4.961122 | -0.704198 | 1.225395  |
| H | -7.133715 | -0.943624 | -0.005748 |
| H | -6.585433 | 0.740943  | -0.016361 |
| H | -6.385111 | -0.268253 | -1.459308 |
| H | -3.709236 | -2.496563 | 0.039296  |
| H | -4.682868 | -2.217011 | -1.421779 |
| H | -5.444584 | -2.847205 | 0.046293  |

M062X energy = -1154.58538037 a.u.

(2R,6R,7S,8S)-1, Conf. T

|   |           |           |           |
|---|-----------|-----------|-----------|
| C | -2.108404 | -3.219789 | -0.598231 |
| C | -2.778369 | -1.866673 | -0.559610 |
| C | -3.059197 | -1.039587 | 0.454275  |
| C | -3.006454 | -1.347529 | 1.929856  |
| C | 0.000622  | -1.822356 | -0.515050 |
| C | -0.649297 | -3.046497 | -1.115101 |
| C | -2.263328 | 1.119539  | -0.597036 |
| C | -0.912867 | 1.147475  | 0.174192  |
| C | 0.261036  | 0.705322  | -0.724718 |
| C | 0.048358  | -0.698699 | -1.240494 |
| O | -2.644502 | 2.486103  | -0.818685 |
| C | -1.889829 | 3.353075  | -0.099258 |
| C | -0.814275 | 2.585161  | 0.598212  |
| O | -2.098546 | 4.533271  | -0.074132 |
| C | 0.043147  | 3.191163  | 1.413363  |
| C | -3.407301 | 0.408108  | 0.136009  |
| C | 0.386965  | -1.940325 | 0.934029  |
| O | -2.041030 | -3.906874 | 0.639534  |
| O | 1.449158  | 0.843958  | 0.068038  |
| C | 2.605449  | 0.845645  | -0.630146 |
| O | 2.650037  | 0.773462  | -1.832201 |
| C | 3.814879  | 0.899283  | 0.270350  |
| C | 4.713597  | -0.320642 | 0.015410  |
| C | 5.973493  | -0.237180 | 0.873292  |
| C | 3.945566  | -1.615620 | 0.281502  |
| H | -2.631461 | -3.851824 | -1.332807 |
| H | -2.898090 | -1.459552 | -1.566874 |
| H | -3.997304 | -1.181986 | 2.371759  |
| H | -2.326972 | -0.652307 | 2.439786  |
| H | -0.683221 | -2.951931 | -2.205224 |
| H | -0.113862 | -3.970380 | -0.868862 |
| H | -2.682094 | -2.361694 | 2.151047  |
| H | -0.946149 | 0.468265  | 1.032322  |
| H | 0.344037  | 1.392515  | -1.574057 |
| H | -0.249199 | -0.752314 | -2.286567 |
| H | 0.834293  | 2.650201  | 1.921257  |
| H | -0.046277 | 4.262281  | 1.573342  |
| H | -3.611447 | 0.961401  | 1.061272  |
| H | -2.135838 | 0.675533  | -1.588376 |
| H | -4.307096 | 0.486343  | -0.484074 |
| H | -0.484808 | -2.219080 | 1.535134  |
| H | 0.835798  | -1.027801 | 1.327844  |
| H | 1.110991  | -2.756049 | 1.052677  |
| H | -2.948032 | -4.113017 | 0.908435  |
| H | 4.362450  | 1.820724  | 0.042630  |

|   |          |           |           |
|---|----------|-----------|-----------|
| H | 3.499448 | 0.934274  | 1.318220  |
| H | 4.995774 | -0.294476 | -1.044111 |
| H | 6.635597 | -1.086233 | 0.677102  |
| H | 6.533069 | 0.682582  | 0.674322  |
| H | 5.715788 | -0.252509 | 1.938997  |
| H | 4.579690 | -2.489437 | 0.101647  |
| H | 3.064997 | -1.698971 | -0.366764 |
| H | 3.606238 | -1.653171 | 1.324414  |

M062X energy = -1154.58534057 a.u.

(2R,6R,7S,8S)-1, Conf. U

|   |           |           |           |
|---|-----------|-----------|-----------|
| C | 1.579529  | -3.511850 | -0.271713 |
| C | 2.283805  | -2.308099 | -0.823178 |
| C | 2.822250  | -1.338064 | -0.078508 |
| C | 3.073398  | -1.471433 | 1.405746  |
| C | -0.234292 | -1.924813 | 0.543534  |
| C | 0.055277  | -3.212848 | -0.191391 |
| C | 2.312977  | 1.137431  | 0.055272  |
| C | 0.864359  | 1.455671  | -0.415548 |
| C | -0.230949 | 0.636736  | 0.282542  |
| C | -0.199941 | -0.792099 | -0.167221 |
| O | 3.050905  | 2.356987  | -0.139944 |
| C | 2.229720  | 3.433825  | -0.154020 |
| C | 0.815522  | 2.950507  | -0.194917 |
| O | 2.633858  | 4.562267  | -0.144216 |
| C | -0.179139 | 3.822344  | -0.057168 |
| C | 3.111705  | 0.029056  | -0.648125 |
| C | -0.416985 | -2.026682 | 2.031546  |
| O | 1.688523  | -4.651537 | -1.107001 |
| O | -1.485803 | 1.213888  | -0.144162 |
| C | -2.557511 | 0.907918  | 0.618566  |
| O | -2.478114 | 0.305388  | 1.661497  |
| C | -3.843523 | 1.365814  | -0.021057 |
| C | -4.552690 | 0.191538  | -0.734348 |
| C | -3.647327 | -0.454073 | -1.784568 |
| C | -5.062413 | -0.851312 | 0.260316  |
| H | 1.940053  | -3.744346 | 0.741041  |
| H | 2.116773  | -2.136474 | -1.888250 |
| H | 3.930040  | -0.857146 | 1.704700  |
| H | 3.282901  | -2.502186 | 1.699672  |
| H | -0.428088 | -4.074771 | 0.281537  |
| H | -0.302152 | -3.158489 | -1.225652 |
| H | 2.211215  | -1.132159 | 1.993714  |
| H | 0.797701  | 1.259573  | -1.496382 |
| H | -0.152347 | 0.742409  | 1.368982  |
| H | -0.083563 | -0.885377 | -1.248564 |
| H | -1.222516 | 3.538146  | -0.090866 |
| H | 0.075235  | 4.868521  | 0.091424  |
| H | 2.918018  | 0.063662  | -1.725940 |
| H | 2.294238  | 0.950971  | 1.137653  |
| H | 4.167154  | 0.286866  | -0.491227 |
| H | 0.388689  | -2.622835 | 2.478526  |
| H | -1.357210 | -2.547134 | 2.248458  |
| H | -0.465640 | -1.054882 | 2.523930  |
| H | 2.629854  | -4.845486 | -1.216689 |
| H | -4.488997 | 1.759263  | 0.769669  |

|   |           |           |           |
|---|-----------|-----------|-----------|
| H | -3.628893 | 2.161051  | -0.740586 |
| H | -5.418104 | 0.632041  | -1.245799 |
| H | -4.204155 | -1.196965 | -2.364079 |
| H | -3.238551 | 0.287559  | -2.478734 |
| H | -2.804264 | -0.968520 | -1.306780 |
| H | -5.618556 | -1.635298 | -0.263415 |
| H | -5.726126 | -0.400995 | 1.005267  |
| H | -4.230291 | -1.320337 | 0.794432  |

M062X energy = -1154.58533480 a.u.

(2R,6R,7S,8S)-1, Conf. V

|   |           |           |           |
|---|-----------|-----------|-----------|
| C | 2.577309  | -3.021758 | -0.245558 |
| C | 2.979172  | -1.594043 | -0.527791 |
| C | 3.371367  | -0.688450 | 0.371112  |
| C | 3.679490  | -1.026835 | 1.806503  |
| C | 0.310687  | -1.934099 | 0.038683  |
| C | 1.192307  | -3.080565 | 0.468667  |
| C | 2.110013  | 1.483874  | 0.537030  |
| C | 0.821792  | 1.252559  | -0.311667 |
| C | -0.274030 | 0.508266  | 0.481322  |
| C | 0.201678  | -0.874434 | 0.847315  |
| O | 2.366880  | 2.896765  | 0.537982  |
| C | 1.441300  | 3.600544  | -0.155937 |
| C | 0.441257  | 2.649221  | -0.723461 |
| O | 1.478538  | 4.794021  | -0.263602 |
| C | -0.567091 | 3.097529  | -1.465582 |
| C | 3.380366  | 0.781758  | 0.029359  |
| C | -0.235920 | -2.038029 | -1.362814 |
| O | 2.454444  | -3.762239 | -1.452447 |
| O | -1.439279 | 0.497286  | -0.352622 |
| C | -2.595224 | 0.142731  | 0.254296  |
| O | -2.666353 | -0.096520 | 1.432771  |
| C | -3.720730 | 0.113999  | -0.755960 |
| C | -5.046793 | -0.458641 | -0.245071 |
| C | -4.896561 | -1.912836 | 0.206477  |
| C | -5.668789 | 0.408106  | 0.851694  |
| H | 3.309023  | -3.515031 | 0.411392  |
| H | 2.743740  | -1.259051 | -1.540444 |
| H | 3.739767  | -2.103702 | 1.979578  |
| H | 2.915417  | -0.626958 | 2.485618  |
| H | 1.362194  | -3.031594 | 1.549313  |
| H | 0.757075  | -4.058847 | 0.233940  |
| H | 4.632983  | -0.578813 | 2.108526  |
| H | 1.063029  | 0.639268  | -1.189112 |
| H | -0.514758 | 1.073291  | 1.389093  |
| H | 0.636437  | -0.946865 | 1.843551  |
| H | -1.303669 | 2.433401  | -1.902544 |
| H | -0.653861 | 4.166968  | -1.638377 |
| H | 3.456970  | 0.938593  | -1.052894 |
| H | 1.930951  | 1.207182  | 1.583167  |
| H | 4.231268  | 1.287755  | 0.500436  |
| H | -0.553511 | -1.079667 | -1.773915 |
| H | -1.106939 | -2.707353 | -1.364325 |
| H | 0.508814  | -2.495576 | -2.021267 |
| H | 3.300272  | -3.705362 | -1.919772 |
| H | -3.855531 | 1.144883  | -1.110667 |

|   |           |           |           |
|---|-----------|-----------|-----------|
| H | -3.359798 | -0.457370 | -1.620283 |
| H | -5.724679 | -0.443463 | -1.109156 |
| H | -5.873010 | -2.336547 | 0.461498  |
| H | -4.459721 | -2.530806 | -0.586329 |
| H | -4.254565 | -1.978787 | 1.089178  |
| H | -6.658563 | 0.026533  | 1.121970  |
| H | -5.789492 | 1.444028  | 0.515918  |
| H | -5.043282 | 0.406006  | 1.747557  |

M062X energy = -1154.58526135 a.u.

(2R,6R,7S,8S)-1, Conf. W

|   |           |           |           |
|---|-----------|-----------|-----------|
| C | 3.801225  | -1.834490 | -0.333680 |
| C | 3.480686  | -0.392152 | -0.647611 |
| C | 3.450942  | 0.621519  | 0.220318  |
| C | 3.952723  | 0.512661  | 1.636672  |
| C | 1.313390  | -1.906592 | 0.128652  |
| C | 2.652716  | -2.503769 | 0.482493  |
| C | 1.332997  | 1.945957  | 0.455364  |
| C | 0.275221  | 1.081462  | -0.296771 |
| C | -0.311486 | -0.010304 | 0.625895  |
| C | 0.763931  | -1.015313 | 0.960826  |
| O | 0.868845  | 3.304359  | 0.423219  |
| C | -0.292517 | 3.446582  | -0.259131 |
| C | -0.717202 | 2.108472  | -0.765173 |
| O | -0.836388 | 4.505159  | -0.404466 |
| C | -1.797939 | 1.983900  | -1.529649 |
| C | 2.753844  | 1.913214  | -0.131511 |
| C | 0.799842  | -2.256868 | -1.243563 |
| O | 3.951363  | -2.589370 | -1.528292 |
| O | -1.440344 | -0.580841 | -0.047597 |
| C | -2.247687 | -1.342367 | 0.728697  |
| O | -2.046783 | -1.528387 | 1.901557  |
| C | -3.435649 | -1.840298 | -0.052821 |
| C | -4.494764 | -0.732657 | -0.215932 |
| C | -5.652494 | -1.248480 | -1.068112 |
| C | -4.992175 | -0.241828 | 1.143607  |
| H | 4.720879  | -1.912027 | 0.265431  |
| H | 3.070442  | -0.236075 | -1.647481 |
| H | 4.514431  | -0.407650 | 1.812403  |
| H | 3.125541  | 0.535145  | 2.357881  |
| H | 2.853731  | -2.352238 | 1.548185  |
| H | 2.704850  | -3.578372 | 0.272829  |
| H | 4.603021  | 1.361233  | 1.877666  |
| H | 0.746635  | 0.577363  | -1.148876 |
| H | -0.679553 | 0.454819  | 1.547700  |
| H | 1.228059  | -0.868525 | 1.935036  |
| H | -2.110914 | 1.026849  | -1.931920 |
| H | -2.383126 | 2.869173  | -1.763517 |
| H | 2.686656  | 2.046919  | -1.217581 |
| H | 1.369858  | 1.664415  | 1.514355  |
| H | 3.290220  | 2.776595  | 0.279506  |
| H | 1.603480  | -2.166741 | -1.982125 |
| H | -0.055674 | -1.654332 | -1.548960 |
| H | 0.493371  | -3.310751 | -1.256576 |
| H | 4.647822  | -2.171881 | -2.055367 |
| H | -3.101925 | -2.186203 | -1.036870 |

|   |           |           |           |
|---|-----------|-----------|-----------|
| H | -3.863372 | -2.684571 | 0.496327  |
| H | -4.019555 | 0.108648  | -0.737605 |
| H | -5.308983 | -1.584592 | -2.051782 |
| H | -6.142905 | -2.095217 | -0.573583 |
| H | -6.404640 | -0.467910 | -1.218068 |
| H | -5.448497 | -1.066913 | 1.703157  |
| H | -5.746780 | 0.540615  | 1.018106  |
| H | -4.180233 | 0.162961  | 1.754947  |

M062X energy = -1154.58521966 a.u.

(2R,6R,7S,8S)-1, Conf. X

|   |           |           |           |
|---|-----------|-----------|-----------|
| C | -3.955418 | -1.630295 | -0.446734 |
| C | -3.617637 | -0.156968 | -0.521014 |
| C | -3.288708 | 0.661372  | 0.484104  |
| C | -3.441880 | 0.328055  | 1.943094  |
| C | -1.425540 | -1.881470 | -0.495263 |
| C | -2.722238 | -2.476490 | -0.008527 |
| C | -1.229587 | 1.745994  | -0.482984 |
| C | -0.098726 | 1.239468  | 0.463729  |
| C | 0.377725  | -0.167662 | 0.046712  |
| C | -0.701913 | -1.155993 | 0.361972  |
| O | -0.784257 | 2.990458  | -1.042805 |
| C | 0.453643  | 3.343676  | -0.623686 |
| C | 0.945316  | 2.314571  | 0.339098  |
| O | 1.007160  | 4.340528  | -0.994228 |
| C | 2.115952  | 2.462713  | 0.951498  |
| C | -2.608241 | 1.977886  | 0.150815  |
| C | -1.129063 | -2.004681 | -1.964865 |
| O | -4.982182 | -1.961098 | 0.476708  |
| O | 1.566078  | -0.454665 | 0.805508  |
| C | 2.323013  | -1.459784 | 0.313611  |
| O | 2.050138  | -2.051764 | -0.702783 |
| C | 3.549836  | -1.713472 | 1.155889  |
| C | 4.838900  | -1.237093 | 0.452427  |
| C | 5.128517  | -2.025772 | -0.824574 |
| C | 4.791822  | 0.265402  | 0.174687  |
| H | -4.252891 | -1.952802 | -1.455905 |
| H | -3.457812 | 0.213391  | -1.535823 |
| H | -3.891497 | -0.653714 | 2.094833  |
| H | -4.076284 | 1.079209  | 2.430477  |
| H | -2.865301 | -3.503977 | -0.361617 |
| H | -2.736829 | -2.495025 | 1.086118  |
| H | -2.471986 | 0.367206  | 2.455966  |
| H | -0.462070 | 1.181519  | 1.497479  |
| H | 0.641089  | -0.165219 | -1.014950 |
| H | -1.003033 | -1.143965 | 1.410709  |
| H | 2.481691  | 1.744206  | 1.675818  |
| H | 2.725336  | 3.332039  | 0.718467  |
| H | -2.491298 | 2.606031  | 1.042227  |
| H | -1.345319 | 1.048868  | -1.321789 |
| H | -3.197064 | 2.551163  | -0.573502 |
| H | -0.082951 | -1.788967 | -2.190181 |
| H | -1.768901 | -1.335067 | -2.556648 |
| H | -1.343014 | -3.024401 | -2.302728 |
| H | -5.743113 | -1.396302 | 0.278932  |
| H | 3.436345  | -1.208204 | 2.119054  |

|   |          |           |           |
|---|----------|-----------|-----------|
| H | 3.606157 | -2.792979 | 1.329792  |
| H | 5.653435 | -1.427729 | 1.163151  |
| H | 6.095993 | -1.726291 | -1.239784 |
| H | 5.158588 | -3.102193 | -0.628140 |
| H | 4.358832 | -1.848179 | -1.580217 |
| H | 5.719568 | 0.600538  | -0.299166 |
| H | 4.658107 | 0.838573  | 1.098266  |
| H | 3.964097 | 0.517857  | -0.499988 |

M062X energy = -1154.58518106 a.u.

(2R,6R,7S,8S)-1, Conf. Y

|   |           |           |           |
|---|-----------|-----------|-----------|
| C | 2.092844  | -3.242070 | -0.263599 |
| C | 2.698761  | -1.886446 | -0.517210 |
| C | 3.140319  | -1.033551 | 0.408103  |
| C | 3.318598  | -1.400026 | 1.858288  |
| C | -0.003344 | -1.850052 | 0.045024  |
| C | 0.710032  | -3.110967 | 0.464079  |
| C | 2.182064  | 1.283837  | 0.537124  |
| C | 0.876318  | 1.185033  | -0.312804 |
| C | -0.292611 | 0.631228  | 0.531456  |
| C | -0.035597 | -0.812781 | 0.891132  |
| O | 2.605030  | 2.655361  | 0.503924  |
| C | 1.784952  | 3.441117  | -0.232481 |
| C | 0.681448  | 2.600324  | -0.783150 |
| O | 1.972325  | 4.615661  | -0.383746 |
| C | -0.250127 | 3.140663  | -1.563039 |
| C | 3.360766  | 0.418856  | 0.063418  |
| C | -0.447384 | -1.816426 | -1.393429 |
| O | 1.958973  | -3.853934 | -1.536522 |
| O | -1.504146 | 0.813234  | -0.215420 |
| C | -2.634952 | 0.840850  | 0.526773  |
| O | -2.632879 | 0.732407  | 1.727889  |
| C | -3.868801 | 0.980340  | -0.330925 |
| C | -4.713415 | -0.311892 | -0.308230 |
| C | -3.866079 | -1.515466 | -0.722549 |
| C | -5.377417 | -0.544243 | 1.048745  |
| H | 2.748619  | -3.852740 | 0.375552  |
| H | 2.609631  | -1.550631 | -1.550296 |
| H | 4.299709  | -1.066211 | 2.214834  |
| H | 3.247539  | -2.477317 | 2.026539  |
| H | 0.884184  | -3.097129 | 1.545655  |
| H | 0.125282  | -4.013569 | 0.237111  |
| H | 2.569906  | -0.914386 | 2.496738  |
| H | 1.037438  | 0.506613  | -1.159622 |
| H | -0.381460 | 1.225639  | 1.446477  |
| H | 0.314325  | -0.970733 | 1.910012  |
| H | -1.058936 | 2.558601  | -1.989583 |
| H | -0.197489 | 4.204180  | -1.780144 |
| H | 3.483338  | 0.556124  | -1.017221 |
| H | 1.964728  | 1.058815  | 1.588532  |
| H | 4.259979  | 0.810862  | 0.553397  |
| H | -0.888362 | -0.861335 | -1.679110 |
| H | -1.197564 | -2.599597 | -1.562022 |
| H | 0.392143  | -2.053411 | -2.056154 |
| H | 1.570087  | -4.730468 | -1.409882 |
| H | -4.456831 | 1.814532  | 0.065785  |



|   |           |           |           |
|---|-----------|-----------|-----------|
| H | -3.569728 | 1.217396  | -1.355600 |
| H | -5.502850 | -0.170484 | -1.057325 |
| H | -3.406037 | -1.360983 | -1.704356 |
| H | -3.060933 | -1.690254 | 0.003586  |
| H | -4.476441 | -2.422762 | -0.769140 |
| H | -6.016705 | -1.432138 | 1.010231  |
| H | -5.998769 | 0.310073  | 1.336175  |
| H | -4.627467 | -0.690495 | 1.830478  |

M062X energy = -1154.58503093 a.u.

(2R,6R,7S,8S)-1, Conf. Z

|   |           |           |           |
|---|-----------|-----------|-----------|
| C | -2.066557 | -3.208732 | -0.562047 |
| C | -2.727652 | -1.859315 | -0.475182 |
| C | -2.979583 | -1.051191 | 0.560426  |
| C | -2.905934 | -1.396543 | 2.025192  |
| C | 0.035204  | -1.806246 | -0.652964 |
| C | -0.661438 | -3.017665 | -1.224172 |
| C | -2.229478 | 1.113619  | -0.529955 |
| C | -0.833922 | 1.134639  | 0.155083  |
| C | 0.280893  | 0.722544  | -0.829074 |
| C | 0.040687  | -0.671103 | -1.362041 |
| O | -2.615825 | 2.483654  | -0.723590 |
| C | -1.823883 | 3.341812  | -0.034876 |
| C | -0.715593 | 2.564511  | 0.598750  |
| O | -2.027823 | 4.522155  | 0.013721  |
| C | 0.178896  | 3.157101  | 1.383085  |
| C | -3.323919 | 0.405762  | 0.276204  |
| C | 0.498404  | -1.933680 | 0.773291  |
| O | -1.963301 | -3.823899 | 0.707549  |
| O | 1.520659  | 0.853578  | -0.118958 |
| C | 2.626688  | 0.898662  | -0.898984 |
| O | 2.583544  | 0.875028  | -2.101789 |
| C | 3.878600  | 0.926372  | -0.059343 |
| C | 4.037479  | -0.372037 | 0.750752  |
| C | 3.963857  | -1.593910 | -0.165484 |
| C | 5.350892  | -0.344052 | 1.529678  |
| H | -2.659332 | -3.850984 | -1.232831 |
| H | -2.864753 | -1.435204 | -1.472296 |
| H | -2.144228 | -0.782458 | 2.525151  |
| H | -2.690787 | -2.446936 | 2.203445  |
| H | -0.801765 | -2.895530 | -2.303641 |
| H | -0.084916 | -3.941071 | -1.071384 |
| H | -3.861595 | -1.142018 | 2.500451  |
| H | -0.811976 | 0.438122  | 0.999843  |
| H | 0.299817  | 1.428301  | -1.666812 |
| H | -0.318148 | -0.706246 | -2.389344 |
| H | 0.991107  | 2.607324  | 1.846697  |
| H | 0.097483  | 4.225271  | 1.565186  |
| H | -3.450331 | 0.950954  | 1.220092  |
| H | -2.165077 | 0.673645  | -1.529004 |
| H | -4.267569 | 0.503734  | -0.272137 |
| H | -0.349402 | -2.173079 | 1.424497  |
| H | 0.997496  | -1.032627 | 1.130713  |
| H | 1.203501  | -2.770658 | 0.859976  |
| H | -1.531105 | -4.680463 | 0.583058  |
| H | 4.722970  | 1.055163  | -0.742987 |

|   |          |           |           |
|---|----------|-----------|-----------|
| H | 3.840219 | 1.787687  | 0.617295  |
| H | 3.207082 | -0.421511 | 1.466789  |
| H | 4.077968 | -2.518009 | 0.410652  |
| H | 3.009085 | -1.643023 | -0.702351 |
| H | 4.764861 | -1.559311 | -0.913535 |
| H | 5.460263 | -1.244630 | 2.142058  |
| H | 5.405211 | 0.525958  | 2.192133  |
| H | 6.204037 | -0.299820 | 0.842790  |

M062X energy = -1154.58492330 a.u.

(2S,6R,7S,8S)-1, Conf. A

|   |           |           |           |
|---|-----------|-----------|-----------|
| C | -3.190833 | -2.678074 | 0.105418  |
| C | -3.437235 | -1.189372 | 0.047449  |
| C | -3.247208 | -0.292834 | 1.017556  |
| C | -2.994720 | -0.651302 | 2.455787  |
| C | -0.809398 | -1.968416 | -0.418866 |
| C | -1.674382 | -2.999512 | 0.260349  |
| C | -1.961574 | 1.486432  | -0.237218 |
| C | -0.557115 | 1.452848  | 0.440624  |
| C | 0.305041  | 0.298437  | -0.107215 |
| C | -0.263456 | -1.011852 | 0.338178  |
| O | -2.141507 | 2.809150  | -0.765940 |
| C | -1.052854 | 3.595434  | -0.599230 |
| C | -0.012030 | 2.824639  | 0.143568  |
| O | -0.996979 | 4.723781  | -1.000798 |
| C | 1.154076  | 3.389859  | 0.442264  |
| C | -3.172570 | 1.178585  | 0.653776  |
| C | -0.778423 | -1.989041 | -1.922092 |
| O | -3.603675 | -3.295158 | -1.104945 |
| O | 1.625049  | 0.475748  | 0.439178  |
| C | 2.614736  | -0.143091 | -0.237707 |
| O | 2.430868  | -0.778530 | -1.246092 |
| C | 3.956737  | 0.103012  | 0.412803  |
| C | 5.045208  | -0.848296 | -0.084128 |
| C | 6.412715  | -0.392934 | 0.422529  |
| C | 4.753019  | -2.284222 | 0.351728  |
| H | -3.715472 | -3.137825 | 0.956904  |
| H | -3.604021 | -0.822238 | -0.968164 |
| H | -3.018537 | -1.729580 | 2.631165  |
| H | -2.021488 | -0.272907 | 2.793001  |
| H | -1.526768 | -4.003903 | -0.151389 |
| H | -1.436620 | -3.028915 | 1.328904  |
| H | -3.750124 | -0.184689 | 3.099596  |
| H | -0.662824 | 1.313089  | 1.524617  |
| H | 0.368716  | 0.374586  | -1.196351 |
| H | -0.341501 | -1.099764 | 1.423394  |
| H | 1.928171  | 2.868609  | 0.992939  |
| H | 1.333414  | 4.412821  | 0.121946  |
| H | -3.124662 | 1.810275  | 1.549152  |
| H | -1.973000 | 0.800450  | -1.093441 |
| H | -4.061421 | 1.485507  | 0.091829  |
| H | 0.049623  | -1.398805 | -2.320262 |
| H | -1.726033 | -1.623901 | -2.338445 |
| H | -0.668348 | -3.018578 | -2.276772 |
| H | -4.538877 | -3.085930 | -1.241118 |

|   |          |           |           |
|---|----------|-----------|-----------|
| H | 4.224329 | 1.147275  | 0.199181  |
| H | 3.835207 | 0.033531  | 1.500738  |
| H | 5.036589 | -0.812005 | -1.180033 |
| H | 7.202506 | -1.058994 | 0.061885  |
| H | 6.648094 | 0.623451  | 0.089885  |
| H | 6.442154 | -0.404463 | 1.518816  |
| H | 5.521667 | -2.967362 | -0.022785 |
| H | 3.785078 | -2.623793 | -0.026307 |
| H | 4.745710 | -2.357678 | 1.446459  |

M062X energy = -1154.58742432 a.u.

(2S,6R,7S,8S)-1, Conf. B

|   |           |           |           |
|---|-----------|-----------|-----------|
| C | -4.049474 | -1.680942 | 0.039216  |
| C | -3.733819 | -0.210114 | -0.092952 |
| C | -3.317943 | 0.625960  | 0.860672  |
| C | -3.327107 | 0.297637  | 2.328090  |
| C | -1.542124 | -1.906124 | -0.293384 |
| C | -2.768380 | -2.515194 | 0.338713  |
| C | -1.376931 | 1.730334  | -0.319066 |
| C | -0.141669 | 1.239307  | 0.496465  |
| C | 0.289822  | -0.172822 | 0.051680  |
| C | -0.739126 | -1.169928 | 0.480691  |
| O | -1.015031 | 2.985595  | -0.914266 |
| C | 0.264965  | 3.342331  | -0.656198 |
| C | 0.883199  | 2.307655  | 0.224327  |
| O | 0.761403  | 4.344687  | -1.087918 |
| C | 2.137873  | 2.440146  | 0.645123  |
| C | -2.683858 | 1.944181  | 0.456129  |
| C | -1.418730 | -2.028029 | -1.786418 |
| O | -4.574737 | -2.185494 | -1.179973 |
| O | 1.546757  | -0.444810 | 0.696773  |
| C | 2.317374  | -1.366968 | 0.084779  |
| O | 2.003108  | -1.922815 | -0.938762 |
| C | 3.630155  | -1.581828 | 0.798626  |
| C | 4.803730  | -1.298381 | -0.150769 |
| C | 4.800118  | 0.165975  | -0.589858 |
| C | 6.126984  | -1.667424 | 0.515208  |
| H | -4.763268 | -1.864649 | 0.856675  |
| H | -3.673505 | 0.122878  | -1.132002 |
| H | -3.889456 | 1.058333  | 2.882744  |
| H | -2.309617 | 0.300304  | 2.739494  |
| H | -2.965643 | -3.529556 | -0.025250 |
| H | -2.634185 | -2.560731 | 1.424713  |
| H | -3.774893 | -0.676795 | 2.538496  |
| H | -0.379176 | 1.202388  | 1.567562  |
| H | 0.450444  | -0.179916 | -1.029919 |
| H | -0.917776 | -1.165757 | 1.557624  |
| H | 2.606178  | 1.715487  | 1.301172  |
| H | 2.710764  | 3.305543  | 0.322434  |
| H | -2.480159 | 2.575218  | 1.329812  |
| H | -1.569860 | 1.033159  | -1.143798 |
| H | -3.350644 | 2.512195  | -0.201845 |
| H | -0.428960 | -1.736464 | -2.143629 |
| H | -2.188150 | -1.430121 | -2.291020 |
| H | -1.598080 | -3.065854 | -2.086100 |
| H | -5.361955 | -1.667540 | -1.401804 |

|   |          |           |           |
|---|----------|-----------|-----------|
| H | 3.683638 | -0.943247 | 1.686604  |
| H | 3.660074 | -2.627471 | 1.125785  |
| H | 4.657604 | -1.930104 | -1.035455 |
| H | 5.609066 | 0.362939  | -1.299938 |
| H | 3.856375 | 0.444441  | -1.072554 |
| H | 4.945812 | 0.825611  | 0.274984  |
| H | 6.967468 | -1.487048 | -0.162160 |
| H | 6.147322 | -2.722088 | 0.808068  |
| H | 6.288229 | -1.063095 | 1.416014  |

M062X energy = -1154.58732939 a.u.

(2S,6R,7S,8S)-1, Conf. C

|   |           |           |           |
|---|-----------|-----------|-----------|
| C | -3.031127 | -2.623045 | 0.183368  |
| C | -3.254412 | -1.132132 | 0.274069  |
| C | -2.908214 | -0.312030 | 1.268638  |
| C | -2.436583 | -0.779251 | 2.617877  |
| C | -0.764888 | -1.893174 | -0.696708 |
| C | -1.517583 | -2.966413 | 0.048585  |
| C | -1.817909 | 1.554725  | -0.043801 |
| C | -0.320179 | 1.454533  | 0.380703  |
| C | 0.411252  | 0.351647  | -0.409346 |
| C | -0.091686 | -0.989719 | 0.023218  |
| O | -2.055150 | 2.917556  | -0.427703 |
| C | -0.941421 | 3.683948  | -0.367570 |
| C | 0.192927  | 2.846106  | 0.122247  |
| O | -0.933277 | 4.844981  | -0.667038 |
| C | 1.402528  | 3.376044  | 0.276963  |
| C | -2.868512 | 1.183399  | 1.011244  |
| C | -0.986752 | -1.814385 | -2.180670 |
| O | -3.662361 | -3.147251 | -0.975765 |
| O | 1.809658  | 0.470190  | -0.096087 |
| C | 2.645089  | -0.125278 | -0.978619 |
| O | 2.269685  | -0.633070 | -2.004868 |
| C | 4.064722  | -0.102510 | -0.472598 |
| C | 4.207452  | -0.918788 | 0.824364  |
| C | 3.682838  | -2.341737 | 0.630444  |
| C | 5.666227  | -0.926407 | 1.276375  |
| H | -3.408963 | -3.138953 | 1.079269  |
| H | -3.569183 | -0.688888 | -0.673919 |
| H | -1.408220 | -0.447765 | 2.811348  |
| H | -2.467863 | -1.866548 | 2.722312  |
| H | -1.461302 | -3.940239 | -0.450097 |
| H | -1.100243 | -3.071366 | 1.055640  |
| H | -3.058269 | -0.342667 | 3.408756  |
| H | -0.241814 | 1.216094  | 1.449788  |
| H | 0.280991  | 0.521903  | -1.481457 |
| H | 0.006651  | -1.155323 | 1.098164  |
| H | 2.245168  | 2.800688  | 0.642368  |
| H | 1.549353  | 4.423277  | 0.026448  |
| H | -2.658699 | 1.741000  | 1.932089  |
| H | -1.986967 | 0.941257  | -0.937491 |
| H | -3.832944 | 1.539924  | 0.633351  |
| H | -2.016183 | -1.505922 | -2.402238 |
| H | -0.866004 | -2.808032 | -2.624402 |
| H | -0.281980 | -1.136993 | -2.666535 |
| H | -4.602302 | -2.920382 | -0.929740 |

|   |          |           |           |
|---|----------|-----------|-----------|
| H | 4.698523 | -0.520623 | -1.260249 |
| H | 4.366289 | 0.936440  | -0.294443 |
| H | 3.600212 | -0.424667 | 1.593128  |
| H | 3.808063 | -2.927914 | 1.546275  |
| H | 2.619712 | -2.349966 | 0.364992  |
| H | 4.230977 | -2.846937 | -0.173457 |
| H | 5.778858 | -1.466142 | 2.221748  |
| H | 6.048677 | 0.089742  | 1.417751  |
| H | 6.296412 | -1.423447 | 0.529577  |

M062X energy = -1154.58725766 a.u.

(2S,6R,7S,8S)-1, Conf. D

|   |           |           |           |
|---|-----------|-----------|-----------|
| C | -2.396007 | -2.954325 | -0.077276 |
| C | -2.923764 | -1.549818 | -0.175831 |
| C | -3.018037 | -0.633809 | 0.794504  |
| C | -2.876318 | -0.907029 | 2.269305  |
| C | -0.163496 | -1.848533 | -0.378900 |
| C | -1.018237 | -3.022391 | -0.789441 |
| C | -2.068289 | 1.338399  | -0.464637 |
| C | -0.649812 | 1.243910  | 0.167159  |
| C | 0.360377  | 0.607385  | -0.812816 |
| C | -0.066421 | -0.791830 | -1.194511 |
| O | -2.300570 | 2.724328  | -0.756702 |
| C | -1.378435 | 3.533030  | -0.178140 |
| C | -0.337725 | 2.680971  | 0.472788  |
| O | -1.440383 | 4.729158  | -0.222153 |
| C | 0.663083  | 3.224577  | 1.158018  |
| C | -3.205086 | 0.830226  | 0.430899  |
| C | 0.364945  | -1.899780 | 1.030017  |
| O | -3.215554 | -3.893947 | -0.751788 |
| O | 1.640901  | 0.652957  | -0.168151 |
| C | 2.705108  | 0.521401  | -0.997502 |
| O | 2.596474  | 0.410443  | -2.190877 |
| C | 3.995530  | 0.488652  | -0.218957 |
| C | 4.056708  | -0.728634 | 0.719834  |
| C | 3.789238  | -2.020589 | -0.052511 |
| C | 5.411251  | -0.776409 | 1.423669  |
| H | -2.267780 | -3.248616 | 0.973747  |
| H | -3.081631 | -1.228716 | -1.208660 |
| H | -2.757371 | -1.966021 | 2.505995  |
| H | -2.022798 | -0.361794 | 2.692638  |
| H | -1.220309 | -2.997394 | -1.865475 |
| H | -0.555354 | -3.988094 | -0.556017 |
| H | -3.766807 | -0.541281 | 2.794794  |
| H | -0.673334 | 0.629971  | 1.073756  |
| H | 0.419107  | 1.223392  | -1.716651 |
| H | -0.482664 | -0.881979 | -2.196146 |
| H | 1.430015  | 2.622301  | 1.633235  |
| H | 0.718342  | 4.306401  | 1.243991  |
| H | -3.227873 | 1.449629  | 1.336258  |
| H | -2.101243 | 0.813329  | -1.423189 |
| H | -4.151508 | 1.001705  | -0.093889 |
| H | 0.999583  | -2.786072 | 1.155799  |
| H | -0.458986 | -2.000888 | 1.747538  |
| H | 0.953737  | -1.020535 | 1.293165  |
| H | -4.099208 | -3.847723 | -0.360347 |

|   |          |           |           |
|---|----------|-----------|-----------|
| H | 4.810542 | 0.449474  | -0.947726 |
| H | 4.088395 | 1.414386  | 0.360833  |
| H | 3.272646 | -0.604159 | 1.477734  |
| H | 3.828166 | -2.887618 | 0.614914  |
| H | 2.806123 | -2.008350 | -0.538058 |
| H | 4.544066 | -2.161117 | -0.835114 |
| H | 5.456410 | -1.613714 | 2.126945  |
| H | 5.607285 | 0.145986  | 1.980018  |
| H | 6.217838 | -0.908420 | 0.693249  |

M062X energy = -1154.58723499 a.u.

(2S,6R,7S,8S)-1, Conf. E

|   |           |           |           |
|---|-----------|-----------|-----------|
| C | -2.801805 | -2.877270 | 0.091434  |
| C | -3.185474 | -1.418651 | 0.162159  |
| C | -2.973025 | -0.565651 | 1.166351  |
| C | -2.521379 | -0.977711 | 2.540152  |
| C | -0.571428 | -1.913923 | -0.646242 |
| C | -1.255190 | -3.062171 | 0.051842  |
| C | -2.002734 | 1.395765  | -0.094545 |
| C | -0.535402 | 1.455155  | 0.429528  |
| C | 0.361433  | 0.431772  | -0.295016 |
| C | -0.027915 | -0.955375 | 0.111070  |
| O | -2.353135 | 2.722682  | -0.515115 |
| C | -1.329386 | 3.600197  | -0.398288 |
| C | -0.152889 | 2.890852  | 0.186250  |
| O | -1.418336 | 4.750966  | -0.722689 |
| C | 0.978731  | 3.548813  | 0.419534  |
| C | -3.075588 | 0.924157  | 0.896259  |
| C | -0.718003 | -1.839986 | -2.140443 |
| O | -3.299804 | -3.461802 | -1.103151 |
| O | 1.712463  | 0.695457  | 0.122908  |
| C | 2.668032  | 0.206978  | -0.695410 |
| O | 2.429360  | -0.341936 | -1.742683 |
| C | 4.050237  | 0.373587  | -0.115670 |
| C | 4.673646  | -1.008638 | 0.141976  |
| C | 6.086519  | -0.852308 | 0.698540  |
| C | 3.794742  | -1.832151 | 1.084451  |
| H | -3.178788 | -3.432100 | 0.964315  |
| H | -3.500919 | -1.011344 | -0.801572 |
| H | -1.541827 | -0.543933 | 2.778693  |
| H | -2.448183 | -2.062334 | 2.652106  |
| H | -1.069944 | -4.022085 | -0.442532 |
| H | -0.890027 | -3.131903 | 1.082091  |
| H | -3.221443 | -0.603249 | 3.296501  |
| H | -0.505583 | 1.231189  | 1.503995  |
| H | 0.295487  | 0.585555  | -1.375688 |
| H | 0.033893  | -1.117755 | 1.189084  |
| H | 1.848092  | 3.072861  | 0.857312  |
| H | 1.030133  | 4.603007  | 0.160545  |
| H | -2.986073 | 1.505853  | 1.821831  |
| H | -2.048456 | 0.759572  | -0.987349 |
| H | -4.045760 | 1.173231  | 0.452454  |
| H | -0.537415 | -2.826379 | -2.579156 |
| H | -0.014347 | -1.132938 | -2.584696 |
| H | -1.744026 | -1.567480 | -2.418626 |
| H | -4.258530 | -3.329669 | -1.121274 |

|   |          |           |           |
|---|----------|-----------|-----------|
| H | 4.658513 | 0.926956  | -0.839070 |
| H | 3.999729 | 0.949697  | 0.813898  |
| H | 4.722281 | -1.522316 | -0.826078 |
| H | 6.557333 | -1.829012 | 0.846907  |
| H | 6.720827 | -0.267835 | 0.024316  |
| H | 6.063312 | -0.341038 | 1.668430  |
| H | 4.244842 | -2.811031 | 1.276815  |
| H | 2.797385 | -1.999141 | 0.661764  |
| H | 3.676386 | -1.319973 | 2.047236  |

M062X energy = -1154.58707160 a.u.

(2S,6R,7S,8S)-1, Conf. F

|   |           |           |           |
|---|-----------|-----------|-----------|
| C | -4.082896 | -1.479516 | 0.228111  |
| C | -3.692568 | -0.022934 | 0.152595  |
| C | -3.108992 | 0.716140  | 1.098454  |
| C | -2.960733 | 0.284353  | 2.531201  |
| C | -1.649286 | -1.819756 | -0.415230 |
| C | -2.830185 | -2.400528 | 0.320579  |
| C | -1.256637 | 1.783032  | -0.240837 |
| C | 0.032905  | 1.175486  | 0.394070  |
| C | 0.326785  | -0.225370 | -0.181636 |
| C | -0.716534 | -1.184782 | 0.300780  |
| O | -0.889601 | 3.047882  | -0.811638 |
| C | 0.427849  | 3.324990  | -0.675932 |
| C | 1.076309  | 2.213402  | 0.080587  |
| O | 0.931790  | 4.323958  | -1.106830 |
| C | 2.367096  | 2.275159  | 0.393051  |
| C | -2.444430 | 2.021479  | 0.701316  |
| C | -1.706694 | -1.844736 | -1.917101 |
| O | -4.773742 | -1.867965 | -0.950246 |
| O | 1.621404  | -0.626067 | 0.305220  |
| C | 2.197127  | -1.632598 | -0.393466 |
| O | 1.716897  | -2.097474 | -1.396112 |
| C | 3.485763  | -2.092269 | 0.246014  |
| C | 4.450498  | -0.952932 | 0.595586  |
| C | 5.726310  | -1.521488 | 1.215083  |
| C | 4.769175  | -0.109954 | -0.638982 |
| H | -4.708028 | -1.681381 | 1.111321  |
| H | -3.736832 | 0.380239  | -0.862061 |
| H | -1.902506 | 0.207844  | 2.812432  |
| H | -3.434342 | -0.680026 | 2.731428  |
| H | -3.131856 | -3.375715 | -0.077351 |
| H | -2.574864 | -2.525831 | 1.378164  |
| H | -3.407973 | 1.029538  | 3.199937  |
| H | -0.088764 | 1.077168  | 1.480637  |
| H | 0.371462  | -0.169458 | -1.272697 |
| H | -0.773259 | -1.240434 | 1.389612  |
| H | 2.861308  | 1.497746  | 0.963997  |
| H | 2.945769  | 3.135522  | 0.067157  |
| H | -2.098088 | 2.578953  | 1.580104  |
| H | -1.593319 | 1.151091  | -1.071485 |
| H | -3.146779 | 2.669155  | 0.165191  |
| H | -2.015430 | -2.838039 | -2.258212 |
| H | -0.739215 | -1.614558 | -2.367592 |
| H | -2.466304 | -1.146363 | -2.290887 |
| H | -5.544196 | -1.290054 | -1.047066 |

|   |          |           |           |
|---|----------|-----------|-----------|
| H | 3.224004 | -2.649922 | 1.154285  |
| H | 3.950466 | -2.792990 | -0.454417 |
| H | 3.956937 | -0.318460 | 1.342664  |
| H | 6.414965 | -0.718780 | 1.496595  |
| H | 5.508184 | -2.111636 | 2.111137  |
| H | 6.243748 | -2.171527 | 0.499942  |
| H | 5.445447 | 0.713525  | -0.387299 |
| H | 3.863799 | 0.323121  | -1.078945 |
| H | 5.256503 | -0.724469 | -1.405210 |

M062X energy = -1154.58693527 a.u.

(2S,6R,7S,8S)-1, Conf. G

|   |           |           |           |
|---|-----------|-----------|-----------|
| C | -2.285774 | -3.057573 | -0.105571 |
| C | -2.874776 | -1.683747 | -0.264432 |
| C | -3.096572 | -0.765392 | 0.682645  |
| C | -3.060267 | -1.017304 | 2.167657  |
| C | -0.098645 | -1.840142 | -0.272207 |
| C | -0.861109 | -3.062691 | -0.721590 |
| C | -2.160616 | 1.238482  | -0.539900 |
| C | -0.784785 | 1.227362  | 0.186123  |
| C | 0.323195  | 0.634267  | -0.710729 |
| C | -0.001261 | -0.790455 | -1.096669 |
| O | -2.445855 | 2.606916  | -0.866859 |
| C | -1.610974 | 3.470386  | -0.237025 |
| C | -0.571446 | 2.682676  | 0.492019  |
| O | -1.735441 | 4.660847  | -0.299635 |
| C | 0.352423  | 3.286163  | 1.233012  |
| C | -3.327630 | 0.683421  | 0.285841  |
| C | 0.328052  | -1.845851 | 1.171955  |
| O | -3.009985 | -4.047564 | -0.816682 |
| O | 1.548480  | 0.755608  | 0.026386  |
| C | 2.674861  | 0.638941  | -0.712289 |
| O | 2.666063  | 0.479310  | -1.906211 |
| C | 3.919533  | 0.677942  | 0.139144  |
| C | 4.698518  | -0.638653 | -0.011944 |
| C | 5.991210  | -0.582704 | 0.797967  |
| C | 3.831070  | -1.825843 | 0.407512  |
| H | -2.214751 | -3.328688 | 0.956911  |
| H | -2.964634 | -1.381104 | -1.310830 |
| H | -2.265039 | -0.433064 | 2.648602  |
| H | -2.917505 | -2.068112 | 2.427078  |
| H | -0.990062 | -3.061610 | -1.809086 |
| H | -0.365947 | -3.999508 | -0.441573 |
| H | -4.003180 | -0.683011 | 2.617112  |
| H | -0.834936 | 0.622678  | 1.097983  |
| H | 0.416665  | 1.241289  | -1.617879 |
| H | -0.341306 | -0.915476 | -2.123010 |
| H | 1.120022  | 2.730802  | 1.761077  |
| H | 0.343623  | 4.370071  | 1.309295  |
| H | -3.439236 | 1.310940  | 1.179263  |
| H | -2.102610 | 0.703979  | -1.492230 |
| H | -4.244715 | 0.803486  | -0.301773 |
| H | -0.544323 | -1.943888 | 1.830970  |
| H | 0.883453  | -0.950881 | 1.453688  |
| H | 0.965501  | -2.717391 | 1.366031  |
| H | -3.920526 | -4.035483 | -0.489740 |

|   |          |           |           |
|---|----------|-----------|-----------|
| H | 4.535374 | 1.516995  | -0.202822 |
| H | 3.651521 | 0.848683  | 1.186923  |
| H | 4.943512 | -0.745213 | -1.075782 |
| H | 6.569594 | -1.503209 | 0.672071  |
| H | 6.620234 | 0.258931  | 0.490641  |
| H | 5.772279 | -0.468305 | 1.866395  |
| H | 4.382110 | -2.766341 | 0.309173  |
| H | 2.927099 | -1.899421 | -0.209128 |
| H | 3.521645 | -1.723798 | 1.455527  |

M062X energy = -1154.58689820 a.u.

(2S,6R,7S,8S)-1, Conf. H

|   |           |           |           |
|---|-----------|-----------|-----------|
| C | -2.491814 | -3.039932 | 0.038688  |
| C | -2.985543 | -1.612645 | 0.057051  |
| C | -2.915058 | -0.735578 | 1.060645  |
| C | -2.540687 | -1.099120 | 2.470723  |
| C | -0.301195 | -1.924106 | -0.588283 |
| C | -0.937118 | -3.104538 | 0.101357  |
| C | -2.027707 | 1.286856  | -0.176310 |
| C | -0.596203 | 1.465827  | 0.417973  |
| C | 0.408037  | 0.502220  | -0.244440 |
| C | 0.101059  | -0.901556 | 0.173269  |
| O | -2.459960 | 2.579884  | -0.625983 |
| C | -1.512306 | 3.534347  | -0.476332 |
| C | -0.312502 | 2.923028  | 0.168475  |
| O | -1.673502 | 4.671688  | -0.819611 |
| C | 0.756266  | 3.665858  | 0.440173  |
| C | -3.110259 | 0.740619  | 0.764536  |
| C | -0.341943 | -1.911942 | -2.090359 |
| O | -2.866918 | -3.677607 | -1.173437 |
| O | 1.716618  | 0.872565  | 0.224489  |
| C | 2.741683  | 0.456194  | -0.552062 |
| O | 2.584341  | -0.102965 | -1.610040 |
| C | 4.074977  | 0.723709  | 0.099289  |
| C | 4.641595  | -0.568069 | 0.731161  |
| C | 3.633852  | -1.202444 | 1.691809  |
| C | 5.084447  | -1.570254 | -0.334329 |
| H | -2.881860 | -3.609274 | 0.896200  |
| H | -3.251567 | -1.240122 | -0.935221 |
| H | -1.619556 | -0.587035 | 2.777509  |
| H | -2.392523 | -2.173454 | 2.604657  |
| H | -0.645602 | -4.059742 | -0.349118 |
| H | -0.638424 | -3.115684 | 1.154967  |
| H | -3.323645 | -0.773799 | 3.166292  |
| H | -0.603571 | 1.260311  | 1.496756  |
| H | 0.379157  | 0.631773  | -1.329693 |
| H | 0.091275  | -1.029963 | 1.257629  |
| H | 1.638490  | 3.259507  | 0.920680  |
| H | 0.742231  | 4.717925  | 0.168413  |
| H | -3.111671 | 1.334999  | 1.686213  |
| H | -1.978267 | 0.644415  | -1.064057 |
| H | -4.072707 | 0.913965  | 0.270755  |
| H | 0.014774  | -2.872848 | -2.475546 |
| H | 0.283317  | -1.123148 | -2.513059 |
| H | -1.373339 | -1.805613 | -2.449246 |
| H | -3.830252 | -3.623692 | -1.252034 |

|   |          |           |           |
|---|----------|-----------|-----------|
| H | 4.759833 | 1.090905  | -0.670771 |
| H | 3.953055 | 1.493152  | 0.866555  |
| H | 5.524337 | -0.261735 | 1.306665  |
| H | 4.094002 | -2.032745 | 2.236185  |
| H | 3.257702 | -0.477176 | 2.421002  |
| H | 2.773029 | -1.601988 | 1.140863  |
| H | 5.516633 | -2.459947 | 0.134761  |
| H | 5.837559 | -1.135737 | -0.999433 |
| H | 4.235464 | -1.882635 | -0.949482 |

M062X energy = -1154.58683757 a.u.

(2S,6R,7S,8S)-1, Conf. I

|   |           |           |           |
|---|-----------|-----------|-----------|
| C | -3.180732 | -2.688069 | 0.092158  |
| C | -3.436617 | -1.205027 | 0.046484  |
| C | -3.236079 | -0.314884 | 1.019288  |
| C | -2.965958 | -0.676141 | 2.453827  |
| C | -0.792381 | -1.972648 | -0.405798 |
| C | -1.657690 | -2.996114 | 0.283454  |
| C | -1.975791 | 1.482211  | -0.233092 |
| C | -0.567296 | 1.458025  | 0.437851  |
| C | 0.301017  | 0.308644  | -0.110491 |
| C | -0.255358 | -1.004285 | 0.342089  |
| O | -2.168925 | 2.806467  | -0.754106 |
| C | -1.083863 | 3.598293  | -0.596381 |
| C | -0.031539 | 2.832534  | 0.135777  |
| O | -1.037144 | 4.727746  | -0.996356 |
| C | 1.134141  | 3.404385  | 0.423191  |
| C | -3.180281 | 1.158664  | 0.661020  |
| C | -0.764418 | -2.015346 | -1.907605 |
| O | -3.651501 | -3.193486 | -1.147134 |
| O | 1.622015  | 0.495267  | 0.430888  |
| C | 2.610883  | -0.130331 | -0.240755 |
| O | 2.425358  | -0.777258 | -1.241609 |
| C | 3.953764  | 0.122839  | 0.405199  |
| C | 5.042327  | -0.831781 | -0.085043 |
| C | 6.410033  | -0.371687 | 0.416806  |
| C | 4.751446  | -2.264412 | 0.362492  |
| H | -3.724318 | -3.162073 | 0.924165  |
| H | -3.649288 | -0.844320 | -0.961123 |
| H | -2.983729 | -1.755177 | 2.626568  |
| H | -3.720610 | -0.217727 | 3.104384  |
| H | -1.472523 | -4.011009 | -0.094812 |
| H | -1.436322 | -3.001911 | 1.356291  |
| H | -1.993287 | -0.292920 | 2.787309  |
| H | -0.667382 | 1.320505  | 1.522701  |
| H | 0.360758  | 0.382785  | -1.199813 |
| H | -0.333909 | -1.084138 | 1.427657  |
| H | 1.916633  | 2.888068  | 0.966505  |
| H | 1.303977  | 4.428392  | 0.101014  |
| H | -3.136037 | 1.788202  | 1.558150  |
| H | -1.986401 | 0.800365  | -1.092694 |
| H | -4.074227 | 1.457030  | 0.102807  |
| H | 0.001834  | -1.359360 | -2.324499 |
| H | -1.746922 | -1.755696 | -2.321305 |
| H | -0.550866 | -3.036421 | -2.243154 |
| H | -3.499896 | -4.148549 | -1.159689 |

|   |          |           |           |
|---|----------|-----------|-----------|
| H | 4.220122 | 1.165463  | 0.182406  |
| H | 3.833988 | 0.062617  | 1.493897  |
| H | 5.032819 | -0.804372 | -1.181207 |
| H | 7.199976 | -1.039964 | 0.060606  |
| H | 6.644357 | 0.642206  | 0.075984  |
| H | 6.440457 | -0.374592 | 1.513115  |
| H | 5.520360 | -2.949958 | -0.007109 |
| H | 3.783409 | -2.607367 | -0.012213 |
| H | 4.744939 | -2.329191 | 1.457780  |

M062X energy = -1154.58652371 a.u.

(2S,6R,7S,8S)-1, Conf. J

|   |           |           |           |
|---|-----------|-----------|-----------|
| C | -4.055130 | -1.668178 | 0.021369  |
| C | -3.739521 | -0.200768 | -0.096855 |
| C | -3.312295 | 0.622083  | 0.861990  |
| C | -3.311775 | 0.284369  | 2.327441  |
| C | -1.541720 | -1.906623 | -0.279833 |
| C | -2.772360 | -2.500235 | 0.357321  |
| C | -1.379215 | 1.735749  | -0.316728 |
| C | -0.141509 | 1.243817  | 0.495389  |
| C | 0.289609  | -0.169038 | 0.052539  |
| C | -0.737261 | -1.165691 | 0.487873  |
| O | -1.018629 | 2.992993  | -0.909251 |
| C | 0.262072  | 3.348037  | -0.656200 |
| C | 0.883476  | 2.311407  | 0.220179  |
| O | 0.758541  | 4.350567  | -1.087803 |
| C | 2.139590  | 2.443549  | 0.636660  |
| C | -2.684844 | 1.944643  | 0.461495  |
| C | -1.423438 | -2.039961 | -1.771962 |
| O | -4.593045 | -2.042364 | -1.237025 |
| O | 1.547975  | -0.439485 | 0.695727  |
| C | 2.312122  | -1.371658 | 0.091242  |
| O | 1.990665  | -1.938810 | -0.923969 |
| C | 3.627887  | -1.581878 | 0.800951  |
| C | 4.797408  | -1.301961 | -0.154664 |
| C | 4.790028  | 0.159861  | -0.602038 |
| C | 6.123696  | -1.665173 | 0.508503  |
| H | -4.792763 | -1.854402 | 0.817296  |
| H | -3.719047 | 0.143295  | -1.132144 |
| H | -2.293488 | 0.280793  | 2.736990  |
| H | -3.765061 | -0.688371 | 2.534924  |
| H | -2.947975 | -3.533644 | 0.027738  |
| H | -2.647662 | -2.520735 | 1.445659  |
| H | -3.870246 | 1.043520  | 2.888141  |
| H | -0.376360 | 1.208742  | 1.567144  |
| H | 0.447877  | -0.178901 | -1.029328 |
| H | -0.914457 | -1.154658 | 1.564764  |
| H | 2.610530  | 1.718614  | 1.290454  |
| H | 2.710789  | 3.309633  | 0.312767  |
| H | -2.481008 | 2.573663  | 1.336656  |
| H | -1.574226 | 1.041248  | -1.143193 |
| H | -3.354935 | 2.511813  | -0.193626 |
| H | -1.565412 | -3.087856 | -2.059655 |
| H | -0.445568 | -1.722680 | -2.139056 |
| H | -2.215961 | -1.473618 | -2.276479 |
| H | -4.817580 | -2.982419 | -1.200916 |

|   |          |           |           |
|---|----------|-----------|-----------|
| H | 3.684478 | -0.938570 | 1.685306  |
| H | 3.660447 | -2.625840 | 1.133084  |
| H | 4.648975 | -1.939117 | -1.035083 |
| H | 5.595638 | 0.353691  | -1.316739 |
| H | 3.843893 | 0.434766  | -1.082063 |
| H | 4.938680 | 0.824517  | 0.258395  |
| H | 6.961337 | -1.487366 | -0.173048 |
| H | 6.146840 | -2.718094 | 0.807396  |
| H | 6.287302 | -1.055346 | 1.405150  |

M062X energy = -1154.58643900 a.u.

(2S,6R,7S,8S)-1, Conf. K

|   |           |           |           |
|---|-----------|-----------|-----------|
| C | -3.992795 | -1.639886 | 0.008422  |
| C | -3.664252 | -0.179872 | -0.193192 |
| C | -3.284171 | 0.707778  | 0.728500  |
| C | -3.359027 | 0.464153  | 2.210466  |
| C | -1.474460 | -1.890816 | -0.197833 |
| C | -2.730446 | -2.455686 | 0.416314  |
| C | -1.284085 | 1.725081  | -0.425494 |
| C | -0.097627 | 1.277962  | 0.482130  |
| C | 0.358683  | -0.151858 | 0.125016  |
| C | -0.694464 | -1.120269 | 0.565973  |
| O | -0.877458 | 2.934856  | -1.082610 |
| C | 0.382622  | 3.312130  | -0.761762 |
| C | 0.933205  | 2.344072  | 0.231631  |
| O | 0.909484  | 4.284329  | -1.224983 |
| C | 2.135060  | 2.527457  | 0.769305  |
| C | -2.622872 | 1.996464  | 0.273737  |
| C | -1.288868 | -2.091907 | -1.676191 |
| O | -4.461001 | -2.213519 | -1.203298 |
| O | 1.589978  | -0.391700 | 0.830174  |
| C | 2.326654  | -1.418592 | 0.352019  |
| O | 2.006210  | -2.063485 | -0.616945 |
| C | 3.595112  | -1.624107 | 1.144364  |
| C | 4.847200  | -1.197721 | 0.348903  |
| C | 5.085279  | -2.078533 | -0.877539 |
| C | 4.776025  | 0.279518  | -0.038107 |
| H | -4.745254 | -1.774782 | 0.800255  |
| H | -3.554205 | 0.091910  | -1.245859 |
| H | -3.930207 | 1.263069  | 2.698171  |
| H | -2.359238 | 0.473901  | 2.663480  |
| H | -2.916096 | -3.491062 | 0.109924  |
| H | -2.644495 | -2.430704 | 1.507917  |
| H | -3.831295 | -0.490398 | 2.455946  |
| H | -0.399208 | 1.283180  | 1.537276  |
| H | 0.559223  | -0.215045 | -0.948464 |
| H | -0.915823 | -1.054096 | 1.632912  |
| H | 2.538124  | 1.850947  | 1.514059  |
| H | 2.731016  | 3.380167  | 0.454803  |
| H | -2.452868 | 2.679297  | 1.115139  |
| H | -1.445156 | 0.979009  | -1.213162 |
| H | -3.255200 | 2.525956  | -0.447382 |
| H | -1.987997 | -1.469410 | -2.248988 |
| H | -1.520352 | -3.128670 | -1.940103 |
| H | -0.264751 | -1.878771 | -1.989525 |
| H | -5.229739 | -1.703383 | -1.496412 |

|   |          |           |           |
|---|----------|-----------|-----------|
| H | 3.531435 | -1.057695 | 2.077612  |
| H | 3.659518 | -2.690466 | 1.384250  |
| H | 5.694640 | -1.331174 | 1.033878  |
| H | 6.033291 | -1.810977 | -1.355039 |
| H | 5.127919 | -3.137559 | -0.603550 |
| H | 4.283921 | -1.957823 | -1.611261 |
| H | 5.678668 | 0.582567  | -0.577444 |
| H | 4.678927 | 0.920078  | 0.844855  |
| H | 3.916858 | 0.475885  | -0.691954 |

M062X energy = -1154.58639985 a.u.

(2S,6R,7S,8S)-1, Conf. L

|   |           |           |           |
|---|-----------|-----------|-----------|
| C | -3.079081 | -2.586137 | 0.175108  |
| C | -3.281427 | -1.098017 | 0.284485  |
| C | -2.903542 | -0.293499 | 1.279152  |
| C | -2.420434 | -0.774214 | 2.619678  |
| C | -0.789341 | -1.894000 | -0.680434 |
| C | -1.559033 | -2.945426 | 0.076927  |
| C | -1.806657 | 1.566349  | -0.034007 |
| C | -0.305735 | 1.452740  | 0.377224  |
| C | 0.410014  | 0.340056  | -0.413610 |
| C | -0.100918 | -0.994650 | 0.029831  |
| O | -2.033934 | 2.932000  | -0.415156 |
| C | -0.912153 | 3.686279  | -0.370783 |
| C | 0.219178  | 2.838126  | 0.108893  |
| O | -0.894011 | 4.846333  | -0.674076 |
| C | 1.435132  | 3.357094  | 0.250275  |
| C | -2.851429 | 1.202870  | 1.029323  |
| C | -1.018788 | -1.821029 | -2.163586 |
| O | -3.773247 | -2.978041 | -0.998347 |
| O | 1.811832  | 0.448215  | -0.111799 |
| C | 2.635124  | -0.167887 | -0.991004 |
| O | 2.247065  | -0.691616 | -2.004582 |
| C | 4.060220  | -0.142386 | -0.500133 |
| C | 4.211662  | -0.916487 | 0.821164  |
| C | 3.676199  | -2.341512 | 0.679313  |
| C | 5.675232  | -0.919134 | 1.257673  |
| H | -3.491163 | -3.110843 | 1.051110  |
| H | -3.635172 | -0.652283 | -0.646538 |
| H | -2.485976 | -1.860032 | 2.726405  |
| H | -3.017579 | -0.320087 | 3.419512  |
| H | -1.476674 | -3.934706 | -0.394025 |
| H | -1.158083 | -3.031873 | 1.092826  |
| H | -1.379707 | -0.474886 | 2.799748  |
| H | -0.220776 | 1.218110  | 1.446712  |
| H | 0.272549  | 0.506140  | -1.485466 |
| H | 0.002591  | -1.154561 | 1.104867  |
| H | 2.276100  | 2.775264  | 0.609156  |
| H | 1.588823  | 4.402303  | -0.004550 |
| H | -2.627534 | 1.754816  | 1.950294  |
| H | -1.990394 | 0.955264  | -0.926365 |
| H | -3.815378 | 1.570173  | 0.660964  |
| H | -2.045020 | -1.500338 | -2.381645 |
| H | -0.908834 | -2.818210 | -2.603989 |
| H | -0.306044 | -1.157262 | -2.656349 |
| H | -3.664000 | -3.932696 | -1.108464 |

|   |          |           |           |
|---|----------|-----------|-----------|
| H | 4.681606 | -0.590754 | -1.281057 |
| H | 4.372304 | 0.899316  | -0.359907 |
| H | 3.616067 | -0.393518 | 1.579802  |
| H | 3.804881 | -2.897605 | 1.613235  |
| H | 2.610895 | -2.351300 | 0.422445  |
| H | 4.214886 | -2.876620 | -0.111512 |
| H | 5.794900 | -1.425551 | 2.220437  |
| H | 6.065984 | 0.098619  | 1.358846  |
| H | 6.293763 | -1.446824 | 0.522265  |

M062X energy = -1154.58635256 a.u.

(2S,6R,7S,8S)-1, Conf. M

|   |           |           |           |
|---|-----------|-----------|-----------|
| C | -3.346176 | -2.417209 | -0.116285 |
| C | -3.460534 | -0.933790 | -0.329464 |
| C | -3.407073 | 0.038118  | 0.588281  |
| C | -3.494806 | -0.164750 | 2.078705  |
| C | -0.874869 | -1.972383 | -0.154320 |
| C | -1.965866 | -2.893927 | -0.641691 |
| C | -1.820729 | 1.599568  | -0.605224 |
| C | -0.564018 | 1.186009  | 0.212005  |
| C | 0.346233  | 0.224302  | -0.583194 |
| C | -0.405135 | -1.026327 | -0.974257 |
| O | -1.640635 | 2.974353  | -0.977177 |
| C | -0.606365 | 3.554152  | -0.319075 |
| C | 0.089745  | 2.509333  | 0.491340  |
| O | -0.340823 | 4.718622  | -0.418953 |
| C | 1.122774  | 2.817598  | 1.268913  |
| C | -3.149224 | 1.470616  | 0.150504  |
| C | -0.534494 | -2.097098 | 1.307120  |
| O | -4.305648 | -3.149932 | -0.859802 |
| O | 1.483393  | -0.026436 | 0.254850  |
| C | 2.561559  | -0.551063 | -0.371396 |
| O | 2.594430  | -0.764335 | -1.555979 |
| C | 3.668531  | -0.844653 | 0.614052  |
| C | 5.007003  | -1.150446 | -0.057348 |
| C | 5.560844  | 0.088170  | -0.761769 |
| C | 6.001084  | -1.678990 | 0.975871  |
| H | -3.425861 | -2.663837 | 0.951716  |
| H | -3.416659 | -0.653872 | -1.385193 |
| H | -3.708484 | -1.196299 | 2.365003  |
| H | -4.289433 | 0.471094  | 2.487482  |
| H | -2.025772 | -2.879527 | -1.734987 |
| H | -1.817052 | -3.933080 | -0.326283 |
| H | -2.566233 | 0.144452  | 2.576020  |
| H | -0.858626 | 0.674035  | 1.134437  |
| H | 0.702696  | 0.729019  | -1.488043 |
| H | -0.718274 | -1.054449 | -2.016405 |
| H | 1.641524  | 2.068433  | 1.857352  |
| H | 1.461586  | 3.848985  | 1.315179  |
| H | -3.110633 | 2.136427  | 1.021893  |
| H | -1.880346 | 1.035110  | -1.539526 |
| H | -3.945534 | 1.846557  | -0.501455 |
| H | -0.150988 | -3.104622 | 1.510808  |
| H | -1.433743 | -1.977571 | 1.924629  |
| H | 0.213827  | -1.375005 | 1.634179  |
| H | -5.182570 | -2.839916 | -0.593279 |

|   |          |           |           |
|---|----------|-----------|-----------|
| H | 3.757643 | 0.004382  | 1.303778  |
| H | 3.330750 | -1.696065 | 1.221067  |
| H | 4.827422 | -1.925159 | -0.812313 |
| H | 6.512653 | -0.138331 | -1.252122 |
| H | 4.866769 | 0.454877  | -1.522313 |
| H | 5.741667 | 0.891570  | -0.036757 |
| H | 6.963159 | -1.909191 | 0.508064  |
| H | 5.633070 | -2.589511 | 1.460323  |
| H | 6.180805 | -0.930050 | 1.756614  |

M062X energy = -1154.58632374 a.u.

(2S,6R,7S,8S)-1, Conf. N

|   |           |           |           |
|---|-----------|-----------|-----------|
| C | -2.353597 | -2.997384 | -0.159377 |
| C | -2.877580 | -1.607697 | -0.396058 |
| C | -3.144268 | -0.660737 | 0.510892  |
| C | -3.243206 | -0.879750 | 1.998056  |
| C | -0.116996 | -1.860392 | -0.148021 |
| C | -0.879284 | -3.065890 | -0.640192 |
| C | -2.024208 | 1.283293  | -0.651144 |
| C | -0.723905 | 1.227562  | 0.201745  |
| C | 0.435107  | 0.585739  | -0.591109 |
| C | 0.098666  | -0.835161 | -0.980466 |
| O | -2.220260 | 2.656985  | -1.018649 |
| C | -1.413759 | 3.495235  | -0.320967 |
| C | -0.483715 | 2.676739  | 0.514295  |
| O | -1.480871 | 4.688634  | -0.409195 |
| C | 0.385579  | 3.250386  | 1.340224  |
| C | -3.284815 | 0.786499  | 0.067776  |
| C | 0.175907  | -1.844875 | 1.328570  |
| O | -3.043780 | -3.977388 | -0.916629 |
| O | 1.608227  | 0.687838  | 0.229514  |
| C | 2.783231  | 0.637519  | -0.441561 |
| O | 2.847866  | 0.526214  | -1.640234 |
| C | 3.966915  | 0.689856  | 0.492023  |
| C | 4.657797  | -0.687831 | 0.589793  |
| C | 3.660988  | -1.766165 | 1.015462  |
| C | 5.360304  | -1.070598 | -0.712376 |
| H | -2.390564 | -3.248438 | 0.909800  |
| H | -2.869390 | -1.326160 | -1.452072 |
| H | -2.465566 | -0.319855 | 2.533650  |
| H | -3.171149 | -1.929452 | 2.289372  |
| H | -0.907167 | -3.087570 | -1.734659 |
| H | -0.447695 | -4.012240 | -0.294798 |
| H | -4.204188 | -0.494834 | 2.360049  |
| H | -0.886977 | 0.634097  | 1.107283  |
| H | 0.612494  | 1.173330  | -1.498068 |
| H | -0.147013 | -0.971704 | -2.032009 |
| H | 1.070212  | 2.668127  | 1.947755  |
| H | 0.416896  | 4.334423  | 1.408822  |
| H | -3.458836 | 1.435795  | 0.935274  |
| H | -1.899037 | 0.732078  | -1.587634 |
| H | -4.136313 | 0.925209  | -0.607795 |
| H | 0.710244  | -0.948477 | 1.644967  |
| H | 0.788790  | -2.715596 | 1.592790  |
| H | -0.752847 | -1.929488 | 1.906568  |
| H | -3.979549 | -3.928449 | -0.675461 |

|   |          |           |           |
|---|----------|-----------|-----------|
| H | 4.670262 | 1.428583  | 0.095174  |
| H | 3.632020 | 1.015175  | 1.480649  |
| H | 5.418221 | -0.589332 | 1.375033  |
| H | 4.166703 | -2.725721 | 1.161212  |
| H | 3.156900 | -1.499577 | 1.950805  |
| H | 2.890251 | -1.908925 | 0.246189  |
| H | 5.884390 | -2.024274 | -0.593526 |
| H | 6.094119 | -0.312287 | -1.003987 |
| H | 4.640359 | -1.170795 | -1.529221 |

M062X energy = -1154.58625000 a.u.

(2S,6R,7S,8S)-1, Conf. O

|   |           |           |           |
|---|-----------|-----------|-----------|
| C | -2.799001 | -2.884908 | 0.075264  |
| C | -3.187969 | -1.433079 | 0.163076  |
| C | -2.963863 | -0.586962 | 1.169505  |
| C | -2.500936 | -1.000840 | 2.539169  |
| C | -0.555354 | -1.921229 | -0.625599 |
| C | -1.243452 | -3.059430 | 0.083058  |
| C | -2.016983 | 1.386252  | -0.088275 |
| C | -0.546618 | 1.457492  | 0.427743  |
| C | 0.354672  | 0.436203  | -0.293999 |
| C | -0.022792 | -0.950666 | 0.123818  |
| O | -2.379885 | 2.711544  | -0.504398 |
| C | -1.360745 | 3.594895  | -0.400337 |
| C | -0.174097 | 2.894207  | 0.174731  |
| O | -1.458525 | 4.744492  | -0.726726 |
| C | 0.955807  | 3.559826  | 0.394166  |
| C | -3.080559 | 0.903208  | 0.906751  |
| C | -0.696707 | -1.865549 | -2.120930 |
| O | -3.357080 | -3.352672 | -1.142331 |
| O | 1.706121  | 0.711231  | 0.116287  |
| C | 2.660465  | 0.212771  | -0.696829 |
| O | 2.420143  | -0.354434 | -1.734144 |
| C | 4.044549  | 0.393634  | -0.125730 |
| C | 4.677627  | -0.981970 | 0.142780  |
| C | 6.093736  | -0.812352 | 0.687035  |
| C | 3.810059  | -1.799364 | 1.100904  |
| H | -3.204219 | -3.459447 | 0.922888  |
| H | -3.543776 | -1.034926 | -0.788396 |
| H | -3.197800 | -0.627543 | 3.299080  |
| H | -1.519942 | -0.569113 | 2.775891  |
| H | -1.013870 | -4.029966 | -0.378199 |
| H | -0.903138 | -3.103566 | 1.123574  |
| H | -2.431820 | -2.085944 | 2.650532  |
| H | -0.510953 | 1.240118  | 1.503507  |
| H | 0.283118  | 0.581881  | -1.375376 |
| H | 0.035682  | -1.101522 | 1.203402  |
| H | 1.832650  | 3.091295  | 0.824950  |
| H | 0.997618  | 4.613310  | 0.130614  |
| H | -2.990418 | 1.482354  | 1.833913  |
| H | -2.063424 | 0.751204  | -0.981841 |
| H | -4.054991 | 1.145674  | 0.468946  |
| H | -1.727421 | -1.620381 | -2.405971 |
| H | -0.487500 | -2.851599 | -2.549725 |
| H | -0.004920 | -1.149658 | -2.569170 |
| H | -3.130366 | -4.287911 | -1.238407 |



|   |          |           |           |
|---|----------|-----------|-----------|
| H | 4.645614 | 0.943092  | -0.858138 |
| H | 3.995494 | 0.979378  | 0.797840  |
| H | 4.721915 | -1.506259 | -0.819792 |
| H | 6.570370 | -1.785086 | 0.842909  |
| H | 6.720174 | -0.232673 | 0.001425  |
| H | 6.075461 | -0.290197 | 1.651176  |
| H | 4.266456 | -2.773868 | 1.300673  |
| H | 2.810346 | -1.975609 | 0.687541  |
| H | 3.696426 | -1.277155 | 2.058833  |

M062X energy = -1154.58618102 a.u.

(2S,6R,7S,8S)-1, Conf. P

|   |           |           |           |
|---|-----------|-----------|-----------|
| C | -3.757691 | -1.736441 | 0.119798  |
| C | -3.537457 | -0.261688 | -0.070713 |
| C | -3.128384 | 0.634944  | 0.833891  |
| C | -3.068580 | 0.407866  | 2.322131  |
| C | -1.283191 | -1.894064 | -0.269093 |
| C | -2.620807 | -2.507609 | -0.601893 |
| C | -1.374371 | 1.810291  | -0.553161 |
| C | -0.168622 | 1.064017  | 0.087182  |
| C | 0.368511  | -0.042582 | -0.846830 |
| C | -0.711252 | -1.057878 | -1.141819 |
| O | -0.903523 | 3.113574  | -0.928936 |
| C | 0.314392  | 3.391944  | -0.401867 |
| C | 0.815858  | 2.176489  | 0.308066  |
| O | 0.850015  | 4.457397  | -0.523177 |
| C | 1.964580  | 2.196012  | 0.976800  |
| C | -2.588789 | 1.978051  | 0.369125  |
| C | -0.791142 | -2.149470 | 1.131260  |
| O | -4.960650 | -2.190212 | -0.477635 |
| O | 1.516010  | -0.605655 | -0.195349 |
| C | 2.313800  | -1.358714 | -0.991474 |
| O | 2.113412  | -1.503436 | -2.169000 |
| C | 3.440779  | -1.987831 | -0.207787 |
| C | 4.170915  | -1.021509 | 0.733043  |
| C | 5.292059  | -1.757879 | 1.464981  |
| C | 4.715628  | 0.182333  | -0.034696 |
| H | -3.742056 | -1.997179 | 1.187179  |
| H | -3.566337 | 0.037970  | -1.121485 |
| H | -3.484930 | -0.552212 | 2.632882  |
| H | -3.627719 | 1.200097  | 2.834451  |
| H | -2.825071 | -2.435307 | -1.675343 |
| H | -2.685772 | -3.564019 | -0.317012 |
| H | -2.036899 | 0.471102  | 2.691700  |
| H | -0.467021 | 0.588602  | 1.027487  |
| H | 0.705753  | 0.410236  | -1.785885 |
| H | -1.157019 | -0.968992 | -2.130719 |
| H | 2.339646  | 1.322751  | 1.500642  |
| H | 2.549946  | 3.111354  | 1.000975  |
| H | -2.280570 | 2.585250  | 1.229552  |
| H | -1.686635 | 1.320485  | -1.479540 |
| H | -3.346527 | 2.555617  | -0.171843 |
| H | -0.683974 | -3.229013 | 1.293454  |
| H | -1.523602 | -1.795936 | 1.868190  |
| H | 0.169082  | -1.676329 | 1.337938  |
| H | -5.689870 | -1.687453 | -0.088235 |

|   |          |           |           |
|---|----------|-----------|-----------|
| H | 3.013366 | -2.818111 | 0.370066  |
| H | 4.133047 | -2.415005 | -0.939822 |
| H | 3.444053 | -0.667600 | 1.475241  |
| H | 5.808502 | -1.090054 | 2.161361  |
| H | 4.907191 | -2.610886 | 2.033408  |
| H | 6.033166 | -2.135583 | 0.750989  |
| H | 5.227205 | 0.876896  | 0.639775  |
| H | 3.916308 | 0.734861  | -0.540653 |
| H | 5.437221 | -0.142584 | -0.793663 |

M062X energy = -1154.58618071 a.u.

(2S,6R,7S,8S)-1, Conf. Q

|   |           |           |           |
|---|-----------|-----------|-----------|
| C | -3.844282 | -1.779973 | -0.007365 |
| C | -3.610217 | -0.315679 | -0.254854 |
| C | -3.293499 | 0.629341  | 0.637609  |
| C | -3.377028 | 0.478550  | 2.134204  |
| C | -1.341601 | -1.937851 | -0.129308 |
| C | -2.636222 | -2.581145 | -0.561721 |
| C | -1.414544 | 1.751294  | -0.628098 |
| C | -0.273153 | 1.051180  | 0.163915  |
| C | 0.353355  | -0.106293 | -0.642742 |
| C | -0.686367 | -1.146619 | -0.985229 |
| O | -0.918064 | 3.040230  | -1.020129 |
| C | 0.248021  | 3.353323  | -0.403214 |
| C | 0.690074  | 2.177954  | 0.406183  |
| O | 0.788625  | 4.415602  | -0.530734 |
| C | 1.785994  | 2.231588  | 1.156959  |
| C | -2.715842 | 1.951742  | 0.159563  |
| C | -0.994634 | -2.113206 | 1.325223  |
| O | -4.976391 | -2.276959 | -0.701286 |
| O | 1.432078  | -0.609922 | 0.158703  |
| C | 2.361565  | -1.328671 | -0.509537 |
| O | 2.300172  | -1.548079 | -1.692284 |
| C | 3.498742  | -1.759990 | 0.383697  |
| C | 4.812707  | -1.119865 | -0.093035 |
| C | 4.738024  | 0.404224  | -0.000465 |
| C | 5.988594  | -1.660456 | 0.716762  |
| H | -3.941546 | -1.980618 | 1.068757  |
| H | -3.536722 | -0.071820 | -1.317818 |
| H | -3.819727 | -0.467151 | 2.452461  |
| H | -3.984190 | 1.292097  | 2.549444  |
| H | -2.728915 | -2.573335 | -1.652820 |
| H | -2.727692 | -3.619774 | -0.223517 |
| H | -2.385688 | 0.566396  | 2.597545  |
| H | -0.656116 | 0.631480  | 1.099970  |
| H | 0.784894  | 0.291258  | -1.568140 |
| H | -1.030883 | -1.116818 | -2.017275 |
| H | 2.117807  | 1.384612  | 1.748032  |
| H | 2.370386  | 3.147575  | 1.179270  |
| H | -2.496872 | 2.605206  | 1.013478  |
| H | -1.631019 | 1.213473  | -1.555366 |
| H | -3.418317 | 2.494068  | -0.483048 |
| H | -0.854576 | -3.178985 | 1.543777  |
| H | -1.821129 | -1.771966 | 1.961015  |
| H | -0.086089 | -1.585451 | 1.615177  |
| H | -5.746950 | -1.772510 | -0.404706 |

|   |          |           |           |
|---|----------|-----------|-----------|
| H | 3.289743 | -1.484137 | 1.422583  |
| H | 3.574364 | -2.851115 | 0.322067  |
| H | 4.941154 | -1.401663 | -1.145425 |
| H | 5.657599 | 0.862807  | -0.376515 |
| H | 3.900424 | 0.809015  | -0.579806 |
| H | 4.609098 | 0.718574  | 1.042940  |
| H | 6.932007 | -1.228065 | 0.369314  |
| H | 6.064248 | -2.749540 | 0.635449  |
| H | 5.875219 | -1.407278 | 1.777719  |

M062X energy = -1154.58614918 a.u.

(2S,6R,7S,8S)-1, Conf. R

|   |           |           |           |
|---|-----------|-----------|-----------|
| C | -3.354314 | -2.507874 | -0.001036 |
| C | -3.483785 | -1.010447 | -0.145764 |
| C | -3.352161 | -0.082782 | 0.804514  |
| C | -3.292316 | -0.388357 | 2.275796  |
| C | -0.885651 | -1.986006 | -0.280905 |
| C | -1.891781 | -2.924251 | 0.336355  |
| C | -1.805728 | 1.542057  | -0.355047 |
| C | -0.496726 | 1.442875  | 0.486993  |
| C | 0.341641  | 0.217075  | 0.068844  |
| C | -0.357157 | -1.035274 | 0.495775  |
| O | -1.820758 | 2.845460  | -0.956196 |
| C | -0.711630 | 3.568576  | -0.676179 |
| C | 0.169708  | 2.766696  | 0.223435  |
| O | -0.528558 | 4.672982  | -1.105540 |
| C | 1.318036  | 3.270561  | 0.665335  |
| C | -3.132157 | 1.361680  | 0.394777  |
| C | -0.692642 | -2.082464 | -1.768578 |
| O | -3.676082 | -3.151664 | -1.225384 |
| O | 1.610307  | 0.334555  | 0.736744  |
| C | 2.626808  | -0.353372 | 0.171694  |
| O | 2.498100  | -1.002911 | -0.836667 |
| C | 3.894633  | -0.169310 | 0.976602  |
| C | 5.141138  | -0.857695 | 0.410900  |
| C | 4.998359  | -2.380960 | 0.390373  |
| C | 5.520907  | -0.311834 | -0.967090 |
| H | -4.002225 | -2.889581 | 0.802761  |
| H | -3.502229 | -0.681620 | -1.187736 |
| H | -3.422244 | -1.451911 | 2.491128  |
| H | -4.074256 | 0.165000  | 2.809534  |
| H | -1.772696 | -3.954677 | -0.016379 |
| H | -1.775176 | -2.918679 | 1.425219  |
| H | -2.334530 | -0.068827 | 2.706378  |
| H | -0.735601 | 1.344701  | 1.554135  |
| H | 0.515262  | 0.246623  | -1.010440 |
| H | -0.558379 | -1.070120 | 1.568087  |
| H | 1.970699  | 2.721835  | 1.334292  |
| H | 1.608624  | 4.267552  | 0.345328  |
| H | -3.143775 | 2.030745  | 1.263804  |
| H | -1.767386 | 0.816661  | -1.177083 |
| H | -3.924638 | 1.700012  | -0.281689 |
| H | -0.569718 | -3.131667 | -2.056306 |
| H | 0.187770  | -1.530942 | -2.104698 |
| H | -1.582373 | -1.724462 | -2.301833 |
| H | -4.570085 | -2.880040 | -1.478414 |

|   |          |           |           |
|---|----------|-----------|-----------|
| H | 4.059369 | 0.912145  | 1.067645  |
| H | 3.680350 | -0.526203 | 1.992030  |
| H | 5.954260 | -0.607807 | 1.105844  |
| H | 5.937731 | -2.846027 | 0.074717  |
| H | 4.749496 | -2.769393 | 1.384193  |
| H | 4.214211 | -2.686998 | -0.306407 |
| H | 6.466918 | -0.748224 | -1.302753 |
| H | 5.644387 | 0.776582  | -0.942063 |
| H | 4.751060 | -0.555421 | -1.703712 |

M062X energy = -1154.58614848 a.u.

(2S,6R,7S,8S)-1, Conf. S

|   |           |           |           |
|---|-----------|-----------|-----------|
| C | -4.095144 | -1.458869 | 0.207698  |
| C | -3.700872 | -0.007389 | 0.142355  |
| C | -3.110696 | 0.720930  | 1.091368  |
| C | -2.964672 | 0.286887  | 2.523800  |
| C | -1.651496 | -1.822982 | -0.388195 |
| C | -2.838580 | -2.379645 | 0.355119  |
| C | -1.255840 | 1.786631  | -0.241913 |
| C | 0.032371  | 1.177853  | 0.395891  |
| C | 0.324455  | -0.225857 | -0.174113 |
| C | -0.717146 | -1.181447 | 0.319588  |
| O | -0.884755 | 3.050105  | -0.813875 |
| C | 0.432708  | 3.324022  | -0.678702 |
| C | 1.078489  | 2.212432  | 0.080490  |
| O | 0.940286  | 4.320629  | -1.111085 |
| C | 2.368742  | 2.273186  | 0.395222  |
| C | -2.445376 | 2.026861  | 0.697311  |
| C | -1.709503 | -1.865765 | -1.889618 |
| O | -4.779609 | -1.721289 | -1.006919 |
| O | 1.621402  | -0.625410 | 0.307994  |
| C | 2.190713  | -1.638263 | -0.386103 |
| O | 1.701333  | -2.113103 | -1.379849 |
| C | 3.484486  | -2.093773 | 0.246039  |
| C | 4.450329  | -0.953117 | 0.587815  |
| C | 5.730454  | -1.520094 | 1.199864  |
| C | 4.760570  | -0.111438 | -0.649739 |
| H | -4.757418 | -1.655719 | 1.065128  |
| H | -3.776941 | 0.404519  | -0.865047 |
| H | -1.908401 | 0.195618  | 2.808309  |
| H | -3.454760 | -0.669034 | 2.725643  |
| H | -3.114013 | -3.381822 | -0.001666 |
| H | -2.596231 | -2.466709 | 1.420068  |
| H | -3.403253 | 1.038513  | 3.191061  |
| H | -0.090797 | 1.083997  | 1.482693  |
| H | 0.363422  | -0.176027 | -1.265667 |
| H | -0.773861 | -1.223483 | 1.408757  |
| H | 2.861099  | 1.496689  | 0.969013  |
| H | 2.948923  | 3.132177  | 0.068375  |
| H | -2.100600 | 2.583932  | 1.577027  |
| H | -1.592950 | 1.154461  | -1.072205 |
| H | -3.146145 | 2.674537  | 0.159366  |
| H | -0.740087 | -1.647439 | -2.341415 |
| H | -2.465609 | -1.168821 | -2.272068 |
| H | -2.018564 | -2.863259 | -2.220289 |
| H | -5.058864 | -2.647253 | -1.000853 |

|   |          |           |           |
|---|----------|-----------|-----------|
| H | 3.229052 | -2.650292 | 1.156865  |
| H | 3.945562 | -2.795506 | -0.455814 |
| H | 3.961075 | -0.317992 | 1.337103  |
| H | 6.420144 | -0.716602 | 1.476470  |
| H | 5.518442 | -2.109748 | 2.097734  |
| H | 6.243978 | -2.170233 | 0.481980  |
| H | 5.437845 | 0.712779  | -0.403237 |
| H | 3.852145 | 0.320703  | -1.084185 |
| H | 5.243608 | -0.726427 | -1.418335 |

M062X energy = -1154.58605342 a.u.

(2S,6R,7S,8S)-1, Conf. T

|   |           |           |           |
|---|-----------|-----------|-----------|
| C | -4.107635 | -1.523787 | 0.100706  |
| C | -3.725002 | -0.075404 | -0.087446 |
| C | -3.272666 | 0.777591  | 0.833847  |
| C | -3.298749 | 0.507265  | 2.312917  |
| C | -1.614660 | -1.876453 | -0.231503 |
| C | -2.864167 | -2.402581 | 0.428852  |
| C | -1.283450 | 1.739120  | -0.385304 |
| C | -0.081256 | 1.217351  | 0.458919  |
| C | 0.298742  | -0.218404 | 0.039898  |
| C | -0.769356 | -1.155418 | 0.511257  |
| O | -0.851256 | 2.947057  | -1.029692 |
| C | 0.432885  | 3.266985  | -0.744667 |
| C | 0.981345  | 2.249706  | 0.200337  |
| O | 0.980649  | 4.231552  | -1.199501 |
| C | 2.207423  | 2.376686  | 0.698682  |
| C | -2.578408 | 2.048623  | 0.377825  |
| C | -1.504074 | -2.054139 | -1.720446 |
| O | -4.660255 | -2.049517 | -1.097083 |
| O | 1.557064  | -0.520389 | 0.665610  |
| C | 2.242901  | -1.543567 | 0.108547  |
| O | 1.844499  | -2.166606 | -0.844371 |
| C | 3.578967  | -1.734536 | 0.778641  |
| C | 4.631570  | -0.771540 | 0.192485  |
| C | 5.938276  | -0.901216 | 0.972975  |
| C | 4.856938  | -1.033620 | -1.296291 |
| H | -4.825871 | -1.643332 | 0.926163  |
| H | -3.646255 | 0.212520  | -1.138623 |
| H | -3.818123 | 1.317927  | 2.837659  |
| H | -2.282530 | 0.468553  | 2.725814  |
| H | -3.109033 | -3.421070 | 0.107911  |
| H | -2.726345 | -2.409413 | 1.515380  |
| H | -3.798911 | -0.432626 | 2.559231  |
| H | -0.339779 | 1.201577  | 1.525276  |
| H | 0.435603  | -0.259576 | -1.044701 |
| H | -0.939059 | -1.104658 | 1.588494  |
| H | 2.614008  | 1.669480  | 1.412802  |
| H | 2.818251  | 3.219242  | 0.385649  |
| H | -2.343887 | 2.703084  | 1.226295  |
| H | -1.509501 | 1.021650  | -1.183547 |
| H | -3.218660 | 2.621041  | -0.302314 |
| H | -2.203539 | -1.394154 | -2.249168 |
| H | -1.787739 | -3.075853 | -1.991948 |
| H | -0.487631 | -1.875177 | -2.077162 |
| H | -5.418490 | -1.499538 | -1.341518 |

|   |          |           |           |
|---|----------|-----------|-----------|
| H | 3.473069 | -1.560973 | 1.854049  |
| H | 3.892798 | -2.769495 | 0.610850  |
| H | 4.249852 | 0.251344  | 0.313242  |
| H | 6.691424 | -0.206742 | 0.588221  |
| H | 5.793573 | -0.691838 | 2.037761  |
| H | 6.340363 | -1.916894 | 0.878936  |
| H | 5.594434 | -0.334166 | -1.701536 |
| H | 3.934153 | -0.932348 | -1.873786 |
| H | 5.234464 | -2.051321 | -1.450529 |

M062X energy = -1154.58604371 a.u.

(2S,6R,7S,8S)-1, Conf. U

|   |           |           |           |
|---|-----------|-----------|-----------|
| C | -4.110508 | -1.539402 | -0.005245 |
| C | -3.731862 | -0.095660 | -0.187764 |
| C | -3.279821 | 0.761349  | 0.734640  |
| C | -3.316529 | 0.535724  | 2.223977  |
| C | -1.649202 | -1.962915 | -0.276467 |
| C | -3.028634 | -2.431988 | -0.669112 |
| C | -1.355967 | 1.745308  | -0.567413 |
| C | -0.275704 | 0.871516  | 0.127441  |
| C | 0.199836  | -0.283275 | -0.790266 |
| C | -0.957363 | -1.193303 | -1.123461 |
| O | -0.722966 | 2.985723  | -0.914504 |
| C | 0.487351  | 3.129129  | -0.318125 |
| C | 0.807394  | 1.867547  | 0.418137  |
| O | 1.141416  | 4.129529  | -0.400493 |
| C | 1.900979  | 1.765210  | 1.168112  |
| C | -2.587498 | 2.042530  | 0.297844  |
| C | -1.241361 | -2.260639 | 1.141182  |
| O | -5.324213 | -1.871348 | -0.658843 |
| O | 1.256119  | -0.966836 | -0.102299 |
| C | 2.495817  | -0.909998 | -0.645729 |
| O | 2.749383  | -0.368902 | -1.690450 |
| C | 3.494872  | -1.638897 | 0.222915  |
| C | 4.935281  | -1.202330 | -0.044750 |
| C | 5.140426  | 0.259820  | 0.351954  |
| C | 5.907950  | -2.114230 | 0.700702  |
| H | -4.173680 | -1.792563 | 1.061987  |
| H | -3.681310 | 0.199240  | -1.239175 |
| H | -2.303599 | 0.499549  | 2.645525  |
| H | -3.839340 | -0.378177 | 2.512235  |
| H | -3.173794 | -2.345829 | -1.751299 |
| H | -3.220991 | -3.473209 | -0.386265 |
| H | -3.821374 | 1.380243  | 2.708325  |
| H | -0.673491 | 0.419853  | 1.042155  |
| H | 0.616987  | 0.140199  | -1.707965 |
| H | -1.362765 | -1.056464 | -2.124812 |
| H | 2.138245  | 0.863061  | 1.724427  |
| H | 2.582977  | 2.608719  | 1.233667  |
| H | -2.258060 | 2.616219  | 1.173176  |
| H | -1.676759 | 1.290971  | -1.509035 |
| H | -3.256882 | 2.693339  | -0.275542 |
| H | -1.256912 | -3.344050 | 1.310216  |
| H | -1.958759 | -1.825091 | 1.848686  |
| H | -0.243142 | -1.893814 | 1.378984  |
| H | -6.017816 | -1.301169 | -0.298318 |

|   |          |           |           |
|---|----------|-----------|-----------|
| H | 3.225716 | -1.490052 | 1.276007  |
| H | 3.367702 | -2.711241 | 0.021453  |
| H | 5.109634 | -1.294166 | -1.123261 |
| H | 6.167779 | 0.577747  | 0.149058  |
| H | 4.466810 | 0.919309  | -0.203706 |
| H | 4.956086 | 0.394863  | 1.425877  |
| H | 6.944320 | -1.828308 | 0.496832  |
| H | 5.781767 | -3.161956 | 0.408170  |
| H | 5.749995 | -2.045526 | 1.783868  |

M062X energy = -1154.58601644 a.u.

(2S,6R,7S,8S)-1, Conf. V

|   |           |           |           |
|---|-----------|-----------|-----------|
| C | -2.489899 | -3.047466 | 0.028834  |
| C | -2.989760 | -1.627547 | 0.070442  |
| C | -2.893328 | -0.756548 | 1.076088  |
| C | -2.486163 | -1.121233 | 2.476967  |
| C | -0.294818 | -1.924675 | -0.583742 |
| C | -0.928506 | -3.100177 | 0.114612  |
| C | -2.039208 | 1.275326  | -0.164067 |
| C | -0.602039 | 1.464976  | 0.414365  |
| C | 0.403449  | 0.506052  | -0.252688 |
| C | 0.109055  | -0.898453 | 0.171570  |
| O | -2.485707 | 2.566290  | -0.606769 |
| C | -1.541836 | 3.525808  | -0.473028 |
| C | -0.329445 | 2.922946  | 0.156586  |
| O | -1.713119 | 4.661798  | -0.816314 |
| C | 0.738289  | 3.673142  | 0.411716  |
| C | -3.106451 | 0.718664  | 0.787935  |
| C | -0.348962 | -1.915221 | -2.085513 |
| O | -2.951899 | -3.576150 | -1.203878 |
| O | 1.712687  | 0.885408  | 0.207661  |
| C | 2.736667  | 0.461259  | -0.565485 |
| O | 2.578170  | -0.114289 | -1.614568 |
| C | 4.070684  | 0.742650  | 0.078641  |
| C | 4.640845  | -0.537007 | 0.731736  |
| C | 3.634252  | -1.159358 | 1.701404  |
| C | 5.087509  | -1.554470 | -0.317597 |
| H | -2.891054 | -3.637528 | 0.867588  |
| H | -3.311720 | -1.266979 | -0.907713 |
| H | -3.254642 | -0.795095 | 3.188145  |
| H | -1.557483 | -0.613298 | 2.767884  |
| H | -0.600195 | -4.058131 | -0.311911 |
| H | -0.641027 | -3.096819 | 1.171814  |
| H | -2.342117 | -2.196678 | 2.607964  |
| H | -0.598037 | 1.263873  | 1.494036  |
| H | 0.366879  | 0.632230  | -1.338133 |
| H | 0.108884  | -1.023201 | 1.256098  |
| H | 1.629586  | 3.274251  | 0.881548  |
| H | 0.713648  | 4.724275  | 0.137043  |
| H | -3.102254 | 1.311103  | 1.710901  |
| H | -1.996093 | 0.634337  | -1.053213 |
| H | -4.075687 | 0.883970  | 0.305122  |
| H | 0.001432  | -2.877967 | -2.473822 |
| H | 0.280467  | -1.132566 | -2.513313 |
| H | -1.382006 | -1.800223 | -2.436554 |
| H | -2.643856 | -4.490213 | -1.274166 |

|   |          |           |           |
|---|----------|-----------|-----------|
| H | 4.753541 | 1.098119  | -0.698651 |
| H | 3.948414 | 1.524708  | 0.832963  |
| H | 5.522149 | -0.219059 | 1.303082  |
| H | 3.253658 | -0.423610 | 2.417634  |
| H | 2.776144 | -1.571418 | 1.155502  |
| H | 4.096939 | -1.978592 | 2.260231  |
| H | 4.240213 | -1.875923 | -0.930510 |
| H | 5.519051 | -2.436913 | 0.165614  |
| H | 5.842103 | -1.129120 | -0.986896 |

M062X energy = -1154.58594617 a.u.

(2S,6R,7S,8S)-1, Conf. W

|   |           |           |           |
|---|-----------|-----------|-----------|
| C | -3.920350 | -1.760291 | 0.418562  |
| C | -3.561761 | -0.321589 | 0.702941  |
| C | -2.634805 | 0.135909  | 1.547419  |
| C | -1.935264 | -0.710911 | 2.574501  |
| C | -1.879375 | -1.593452 | -1.096653 |
| C | -2.753317 | -2.519010 | -0.284747 |
| C | -1.358880 | 1.739355  | 0.085194  |
| C | 0.060819  | 1.098438  | 0.060361  |
| C | 0.145940  | -0.052686 | -0.975918 |
| C | -0.718802 | -1.203477 | -0.557613 |
| O | -1.193202 | 3.146935  | -0.142453 |
| C | 0.095351  | 3.495365  | -0.358546 |
| C | 0.949539  | 2.273672  | -0.249503 |
| O | 0.435755  | 4.621515  | -0.590611 |
| C | 2.266858  | 2.377401  | -0.399759 |
| C | -2.155172 | 1.565777  | 1.386186  |
| C | -2.493557 | -1.071828 | -2.365334 |
| O | -5.028861 | -1.826931 | -0.468638 |
| O | 1.514732  | -0.454450 | -1.207459 |
| C | 2.231012  | -0.971304 | -0.196864 |
| O | 1.826464  | -1.094751 | 0.936652  |
| C | 3.605817  | -1.385240 | -0.672359 |
| C | 4.604952  | -1.578998 | 0.467938  |
| C | 5.891406  | -2.206005 | -0.067488 |
| C | 4.896366  | -0.251795 | 1.168793  |
| H | -4.155173 | -2.303494 | 1.346393  |
| H | -3.994501 | 0.381023  | -0.013611 |
| H | -0.854656 | -0.755545 | 2.387538  |
| H | -2.315936 | -1.735307 | 2.600959  |
| H | -3.218762 | -3.297564 | -0.899807 |
| H | -2.145547 | -3.008965 | 0.482507  |
| H | -2.064394 | -0.274520 | 3.572223  |
| H | 0.305880  | 0.687587  | 1.043931  |
| H | -0.153631 | 0.344531  | -1.949249 |
| H | -0.407158 | -1.670547 | 0.373307  |
| H | 2.946999  | 1.537259  | -0.313142 |
| H | 2.689396  | 3.355320  | -0.615293 |
| H | -1.529970 | 1.880696  | 2.230309  |
| H | -1.962973 | 1.356247  | -0.747189 |
| H | -3.003820 | 2.256377  | 1.334172  |
| H | -2.724856 | -1.909855 | -3.032819 |
| H | -1.851422 | -0.373849 | -2.906660 |
| H | -3.451294 | -0.582730 | -2.151871 |
| H | -5.759421 | -1.334622 | -0.067111 |

|   |          |           |           |
|---|----------|-----------|-----------|
| H | 3.473431 | -2.316792 | -1.239329 |
| H | 3.966057 | -0.640997 | -1.393868 |
| H | 4.147995 | -2.260126 | 1.195620  |
| H | 6.613911 | -2.364762 | 0.738770  |
| H | 5.699297 | -3.172126 | -0.545639 |
| H | 6.360047 | -1.549726 | -0.810689 |
| H | 5.612906 | -0.390594 | 1.984250  |
| H | 3.985315 | 0.182004  | 1.591180  |
| H | 5.332514 | 0.466554  | 0.462526  |

M062X energy = -1154.58580687 a.u.

(2S,6R,7S,8S)-1, Conf. X

|   |           |           |           |
|---|-----------|-----------|-----------|
| C | -2.421030 | -2.938611 | -0.069339 |
| C | -2.934339 | -1.527871 | -0.175936 |
| C | -3.032857 | -0.609052 | 0.790098  |
| C | -2.918965 | -0.886698 | 2.265780  |
| C | -0.175838 | -1.847620 | -0.385003 |
| C | -1.040693 | -3.015035 | -0.791457 |
| C | -2.056156 | 1.351689  | -0.469565 |
| C | -0.640746 | 1.241991  | 0.166105  |
| C | 0.366036  | 0.604001  | -0.816253 |
| C | -0.066764 | -0.792431 | -1.201281 |
| O | -2.271207 | 2.739688  | -0.764510 |
| C | -1.345047 | 3.538551  | -0.178073 |
| C | -0.318091 | 2.674972  | 0.479586  |
| O | -1.394101 | 4.735187  | -0.221881 |
| C | 0.681881  | 3.206721  | 1.175245  |
| C | -3.200166 | 0.856923  | 0.423851  |
| C | 0.340526  | -1.897428 | 1.028563  |
| O | -3.304293 | -3.909875 | -0.597301 |
| O | 1.647721  | 0.642575  | -0.174055 |
| C | 2.708404  | 0.496209  | -1.005321 |
| O | 2.594445  | 0.374446  | -2.197280 |
| C | 4.001264  | 0.463905  | -0.231037 |
| C | 4.056840  | -0.739650 | 0.725444  |
| C | 3.778190  | -2.040907 | -0.027211 |
| C | 5.413244  | -0.786394 | 1.425737  |
| H | -2.289108 | -3.222375 | 0.977696  |
| H | -3.067405 | -1.191836 | -1.209855 |
| H | -2.070892 | -0.347013 | 2.707019  |
| H | -2.815024 | -1.947586 | 2.500334  |
| H | -1.231167 | -2.982388 | -1.872134 |
| H | -0.586359 | -3.985551 | -0.562086 |
| H | -3.818080 | -0.518396 | 2.774222  |
| H | -0.672355 | 0.622433  | 1.068609  |
| H | 0.425919  | 1.221941  | -1.718829 |
| H | -0.475148 | -0.879865 | -2.206563 |
| H | 1.438908  | 2.595421  | 1.654837  |
| H | 0.746769  | 4.287641  | 1.265876  |
| H | -3.216375 | 1.476602  | 1.329092  |
| H | -2.091423 | 0.826791  | -1.428219 |
| H | -4.144430 | 1.040125  | -0.100946 |
| H | 0.946268  | -2.800951 | 1.171520  |
| H | -0.491760 | -1.961329 | 1.741087  |
| H | 0.953809  | -1.032627 | 1.283530  |
| H | -3.514892 | -3.652965 | -1.507279 |

|   |          |           |           |
|---|----------|-----------|-----------|
| H | 4.813056 | 0.407702  | -0.962291 |
| H | 4.103542 | 1.397516  | 0.334337  |
| H | 3.276087 | -0.598806 | 1.483943  |
| H | 3.812340 | -2.898256 | 0.652792  |
| H | 2.794036 | -2.028566 | -0.510778 |
| H | 4.530321 | -2.198193 | -0.809222 |
| H | 5.455393 | -1.614150 | 2.140379  |
| H | 5.616550 | 0.142329  | 1.968744  |
| H | 6.216757 | -0.933391 | 0.694804  |

M062X energy = -1154.58551595 a.u.

(2S,6R,7S,8S)-1, Conf. Y

|   |           |           |           |
|---|-----------|-----------|-----------|
| C | -4.000379 | -1.622090 | -0.013121 |
| C | -3.669978 | -0.165671 | -0.204798 |
| C | -3.279379 | 0.710905  | 0.721879  |
| C | -3.349390 | 0.461431  | 2.203288  |
| C | -1.478563 | -1.889529 | -0.176199 |
| C | -2.741528 | -2.433233 | 0.441016  |
| C | -1.280689 | 1.731829  | -0.427054 |
| C | -0.095867 | 1.282198  | 0.482361  |
| C | 0.357098  | -0.149859 | 0.129838  |
| C | -0.696618 | -1.113600 | 0.579722  |
| O | -0.870652 | 2.942399  | -1.081242 |
| C | 0.390037  | 3.315466  | -0.760799 |
| C | 0.938517  | 2.344872  | 0.231614  |
| O | 0.920492  | 4.286490  | -1.222671 |
| C | 2.140473  | 2.525580  | 0.769906  |
| C | -2.620810 | 2.001828  | 0.269706  |
| C | -1.296145 | -2.107178 | -1.652263 |
| O | -4.470778 | -2.073678 | -1.273038 |
| O | 1.590288  | -0.390581 | 0.831592  |
| C | 2.318756  | -1.425602 | 0.359042  |
| O | 1.988498  | -2.079295 | -0.600886 |
| C | 3.592286  | -1.628486 | 1.143750  |
| C | 4.838924  | -1.203859 | 0.338573  |
| C | 5.066182  | -2.085564 | -0.889252 |
| C | 4.767112  | 0.273347  | -0.048364 |
| H | -4.780090 | -1.757041 | 0.752504  |
| H | -3.598770 | 0.115055  | -1.256806 |
| H | -3.909398 | 1.265885  | 2.694745  |
| H | -2.349594 | 0.454953  | 2.656480  |
| H | -2.908004 | -3.486475 | 0.175510  |
| H | -2.668527 | -2.378333 | 1.532951  |
| H | -3.837666 | -0.485850 | 2.446212  |
| H | -0.398768 | 1.291172  | 1.537113  |
| H | 0.553862  | -0.218425 | -0.943957 |
| H | -0.918514 | -1.035664 | 1.645500  |
| H | 2.542065  | 1.848338  | 1.514779  |
| H | 2.737975  | 3.377373  | 0.455825  |
| H | -2.452931 | 2.684534  | 1.111702  |
| H | -1.441681 | 0.987719  | -1.216613 |
| H | -3.252896 | 2.530009  | -0.452396 |
| H | -0.277925 | -1.880150 | -1.974089 |
| H | -2.012837 | -1.508888 | -2.228569 |
| H | -1.503317 | -3.153888 | -1.900149 |
| H | -4.697880 | -3.010171 | -1.191160 |

|   |          |           |           |
|---|----------|-----------|-----------|
| H | 3.534866 | -1.059173 | 2.075633  |
| H | 3.658806 | -2.694151 | 1.385964  |
| H | 5.691309 | -1.338427 | 1.017171  |
| H | 6.010668 | -1.819467 | -1.374449 |
| H | 5.109593 | -3.144559 | -0.615222 |
| H | 4.259283 | -1.964105 | -1.616835 |
| H | 5.665881 | 0.574486  | -0.595151 |
| H | 4.678525 | 0.914275  | 0.835166  |
| H | 3.902921 | 0.471555  | -0.694955 |

M062X energy = -1154.58550445 a.u.

(1R,5S,6S,7S,10R)-2, Conf. A

|   |           |           |           |
|---|-----------|-----------|-----------|
| C | 3.448252  | 0.033245  | -0.191323 |
| C | 2.923867  | 1.396321  | -0.669328 |
| C | 1.554551  | 1.662289  | -0.093930 |
| C | 0.557594  | 0.568833  | -0.425924 |
| C | 1.050250  | -0.774097 | 0.185422  |
| C | 2.432533  | -1.073804 | -0.446661 |
| C | -0.895856 | 0.889547  | -0.070044 |
| C | -1.836248 | -0.239096 | -0.499447 |
| C | -1.394348 | -1.563414 | 0.131111  |
| C | 0.063684  | -1.887042 | -0.208160 |
| C | -3.316520 | 0.125518  | -0.252617 |
| C | -4.252852 | -1.007889 | -0.676912 |
| C | -3.606128 | 0.548867  | 1.189573  |
| O | -1.340297 | 2.062202  | -0.732423 |
| C | 1.306442  | 2.710883  | 0.694833  |
| O | 3.003987  | -2.273503 | 0.042356  |
| H | 0.577260  | 0.443268  | -1.523179 |
| C | 1.176756  | -0.708611 | 1.713487  |
| H | 3.670132  | 0.067712  | 0.881127  |
| H | 4.380926  | -0.223096 | -0.703273 |
| H | 3.622327  | 2.192678  | -0.395267 |
| H | 2.855220  | 1.383902  | -1.766476 |
| H | 2.277189  | -1.152154 | -1.538474 |
| H | -0.970410 | 1.019674  | 1.023243  |
| H | -1.714147 | -0.335989 | -1.590818 |
| H | -2.029324 | -2.377771 | -0.232570 |
| H | -1.530812 | -1.529533 | 1.219369  |
| H | 0.137781  | -2.056197 | -1.293749 |
| H | 0.352760  | -2.823841 | 0.287037  |
| H | -3.520571 | 0.990745  | -0.892888 |
| H | -4.205939 | -1.850631 | 0.022010  |
| H | -5.290299 | -0.659711 | -0.698795 |
| H | -4.002264 | -1.383277 | -1.675770 |
| H | -4.677651 | 0.732265  | 1.320662  |
| H | -3.079033 | 1.471794  | 1.447506  |
| H | -3.317539 | -0.228435 | 1.907364  |
| H | -0.623893 | 2.712862  | -0.696186 |
| H | 0.339013  | 2.878076  | 1.162276  |
| H | 2.083281  | 3.436826  | 0.918087  |
| H | 2.450049  | -3.010508 | -0.250629 |
| H | 1.723389  | -1.587817 | 2.067249  |
| H | 1.713533  | 0.185003  | 2.041727  |
| H | 0.197646  | -0.694726 | 2.200480  |

M062X energy = -737.357403973 a.u.

(1R,5S,6S,7S,10R)-2, Conf. B

|   |           |           |           |
|---|-----------|-----------|-----------|
| C | 3.447075  | 0.040556  | -0.221262 |
| C | 2.914713  | 1.406515  | -0.682852 |
| C | 1.554227  | 1.659249  | -0.082583 |
| C | 0.557541  | 0.570723  | -0.426769 |
| C | 1.043603  | -0.782749 | 0.165299  |
| C | 2.432897  | -1.082649 | -0.449283 |
| C | -0.897331 | 0.890602  | -0.071598 |
| C | -1.840820 | -0.234423 | -0.504463 |
| C | -1.392616 | -1.569567 | 0.101657  |
| C | 0.061152  | -1.885341 | -0.259114 |
| C | -3.318567 | 0.129191  | -0.241344 |
| C | -4.259079 | -0.997498 | -0.674132 |
| C | -3.597406 | 0.531636  | 1.209041  |
| O | -1.337066 | 2.067799  | -0.729337 |
| C | 1.314998  | 2.689205  | 0.732859  |
| O | 2.951940  | -2.328304 | -0.018590 |
| H | 0.579182  | 0.455807  | -1.524814 |
| C | 1.142158  | -0.733183 | 1.696819  |
| H | 3.692107  | 0.093762  | 0.848681  |
| H | 4.372687  | -0.212979 | -0.747903 |
| H | 3.616198  | 2.202331  | -0.414612 |
| H | 2.828828  | 1.399462  | -1.778444 |
| H | 2.286641  | -1.201463 | -1.532090 |
| H | -0.974970 | 1.019283  | 1.021162  |
| H | -1.727927 | -0.317329 | -1.597901 |
| H | -2.031374 | -2.376275 | -0.272345 |
| H | -1.523007 | -1.556744 | 1.191690  |
| H | 0.129638  | -2.007668 | -1.350057 |
| H | 0.378629  | -2.836558 | 0.180842  |
| H | -3.527330 | 1.003575  | -0.867686 |
| H | -4.206497 | -1.850089 | 0.012215  |
| H | -5.296516 | -0.648528 | -0.682868 |
| H | -4.016269 | -1.358841 | -1.679981 |
| H | -4.668402 | 0.709251  | 1.352114  |
| H | -3.071887 | 1.452998  | 1.476098  |
| H | -3.299710 | -0.254859 | 1.913035  |
| H | -0.627455 | 2.724051  | -0.667755 |
| H | 0.352005  | 2.844471  | 1.213433  |
| H | 2.092521  | 3.412613  | 0.962167  |
| H | 3.266699  | -2.215627 | 0.890188  |
| H | 1.806541  | 0.062348  | 2.045570  |
| H | 0.167434  | -0.559492 | 2.159914  |
| H | 1.507975  | -1.693066 | 2.079122  |

M062X energy = -737.356863028 a.u.

(1R,5S,6S,7S,10R)-2, Conf. C

|   |           |           |           |
|---|-----------|-----------|-----------|
| C | 3.442432  | 0.040039  | -0.188125 |
| C | 2.920300  | 1.401880  | -0.673068 |
| C | 1.552986  | 1.662674  | -0.090976 |
| C | 0.557737  | 0.569820  | -0.428100 |
| C | 1.044814  | -0.779436 | 0.175558  |
| C | 2.426702  | -1.075603 | -0.440851 |
| C | -0.896381 | 0.888538  | -0.071112 |

|   |           |           |           |
|---|-----------|-----------|-----------|
| C | -1.838103 | -0.237974 | -0.503889 |
| C | -1.391930 | -1.570222 | 0.108604  |
| C | 0.064368  | -1.889053 | -0.239716 |
| C | -3.316847 | 0.125984  | -0.246427 |
| C | -4.255708 | -1.003512 | -0.675476 |
| C | -3.599171 | 0.536013  | 1.201136  |
| O | -1.339378 | 2.064482  | -0.730097 |
| C | 1.308934  | 2.704708  | 0.707513  |
| O | 2.878647  | -2.310852 | 0.086333  |
| H | 0.577222  | 0.449618  | -1.525623 |
| C | 1.153967  | -0.721797 | 1.706410  |
| H | 3.662086  | 0.080363  | 0.884429  |
| H | 4.383138  | -0.202629 | -0.699873 |
| H | 3.619424  | 2.199417  | -0.404083 |
| H | 2.847387  | 1.384358  | -1.769765 |
| H | 2.277587  | -1.167276 | -1.532332 |
| H | -0.971620 | 1.017030  | 1.021915  |
| H | -1.721721 | -0.323813 | -1.596825 |
| H | -2.027475 | -2.379079 | -0.266480 |
| H | -1.529625 | -1.553255 | 1.197377  |
| H | 0.139368  | -2.027995 | -1.328559 |
| H | 0.377763  | -2.831786 | 0.220136  |
| H | -3.524800 | 0.996966  | -0.877760 |
| H | -4.203743 | -1.852610 | 0.015216  |
| H | -5.293434 | -0.655400 | -0.688058 |
| H | -4.010530 | -1.369730 | -1.679038 |
| H | -4.670534 | 0.714435  | 1.340763  |
| H | -3.073873 | 1.458638  | 1.464101  |
| H | -3.302799 | -0.246492 | 1.910007  |
| H | -0.625989 | 2.717577  | -0.682585 |
| H | 0.343354  | 2.867054  | 1.180329  |
| H | 2.086160  | 3.429577  | 0.933163  |
| H | 3.741663  | -2.505338 | -0.304731 |
| H | 1.737447  | 0.138680  | 2.044530  |
| H | 0.169129  | -0.646226 | 2.175226  |
| H | 1.635651  | -1.633480 | 2.069750  |

M062X energy = -737.356844470 a.u.

(1R,5S,6S,7S,10R)-2, Conf. D

|   |           |           |           |
|---|-----------|-----------|-----------|
| C | 3.397059  | 0.439211  | -0.241887 |
| C | 2.652766  | 1.729605  | -0.618983 |
| C | 1.280904  | 1.743737  | 0.009157  |
| C | 0.450680  | 0.531999  | -0.370122 |
| C | 1.165003  | -0.752082 | 0.140262  |
| C | 2.555100  | -0.794653 | -0.542520 |
| C | -1.023947 | 0.610362  | 0.037104  |
| C | -1.800245 | -0.621292 | -0.436963 |
| C | -1.128301 | -1.895446 | 0.087840  |
| C | 0.348072  | -1.977316 | -0.303562 |
| C | -3.306022 | -0.592023 | -0.074689 |
| C | -3.570039 | -0.051753 | 1.333164  |
| C | -4.147562 | 0.170710  | -1.101176 |
| O | -1.644510 | 1.748130  | -0.541281 |
| C | 0.907842  | 2.687501  | 0.877313  |
| O | 3.319425  | -1.918293 | -0.144941 |
| H | 0.453378  | 0.477848  | -1.473329 |

|   |           |           |           |
|---|-----------|-----------|-----------|
| C | 1.330249  | -0.761485 | 1.665837  |
| H | 3.647472  | 0.444360  | 0.824813  |
| H | 4.339956  | 0.361779  | -0.791995 |
| H | 3.229597  | 2.607603  | -0.313262 |
| H | 2.547453  | 1.770706  | -1.712464 |
| H | 2.376920  | -0.831051 | -1.633037 |
| H | -1.083720 | 0.666849  | 1.137207  |
| H | -1.719742 | -0.628106 | -1.535701 |
| H | -1.657746 | -2.767836 | -0.311751 |
| H | -1.236932 | -1.947780 | 1.179157  |
| H | 0.412870  | -2.066838 | -1.399157 |
| H | 0.789414  | -2.887659 | 0.124042  |
| H | -3.641404 | -1.639637 | -0.094652 |
| H | -2.967325 | -0.562487 | 2.093095  |
| H | -3.345943 | 1.019384  | 1.377193  |
| H | -4.623143 | -0.185981 | 1.599633  |
| H | -3.868082 | 1.225981  | -1.120511 |
| H | -5.212349 | 0.092838  | -0.855140 |
| H | -4.004376 | -0.238388 | -2.107096 |
| H | -1.027514 | 2.491452  | -0.467481 |
| H | -0.054499 | 2.673126  | 1.383368  |
| H | 1.574247  | 3.507730  | 1.129152  |
| H | 2.874968  | -2.713600 | -0.470307 |
| H | 2.008857  | -1.571352 | 1.949545  |
| H | 1.743381  | 0.179233  | 2.038179  |
| H | 0.375597  | -0.919303 | 2.175630  |

M062X energy = -737.356769754 a.u.

(1R,5S,6S,7S,10R)-2, Conf. E

|   |           |           |           |
|---|-----------|-----------|-----------|
| C | 3.394584  | 0.446649  | -0.266897 |
| C | 2.643827  | 1.738332  | -0.627246 |
| C | 1.282325  | 1.739242  | 0.022028  |
| C | 0.451257  | 0.534044  | -0.372003 |
| C | 1.158810  | -0.761280 | 0.117872  |
| C | 2.557631  | -0.803750 | -0.544990 |
| C | -1.025155 | 0.611289  | 0.033012  |
| C | -1.804904 | -0.616385 | -0.446498 |
| C | -1.126861 | -1.899309 | 0.052444  |
| C | 0.343521  | -1.972577 | -0.359215 |
| C | -3.307316 | -0.589589 | -0.070717 |
| C | -3.558862 | -0.069480 | 1.346949  |
| C | -4.157574 | 0.188426  | -1.078418 |
| O | -1.640651 | 1.755002  | -0.539479 |
| C | 0.920696  | 2.663335  | 0.915639  |
| O | 3.273865  | -1.978299 | -0.207515 |
| H | 0.455677  | 0.492409  | -1.475402 |
| C | 1.296159  | -0.793096 | 1.646810  |
| H | 3.662532  | 0.472658  | 0.798547  |
| H | 4.330796  | 0.372126  | -0.829316 |
| H | 3.223289  | 2.616045  | -0.325339 |
| H | 2.522831  | 1.783303  | -1.718560 |
| H | 2.397223  | -0.877571 | -1.629746 |
| H | -1.088897 | 0.664455  | 1.132583  |
| H | -1.734526 | -0.609893 | -1.545869 |
| H | -1.661815 | -2.763507 | -0.357557 |
| H | -1.226868 | -1.972249 | 1.144018  |

|   |           |           |           |
|---|-----------|-----------|-----------|
| H | 0.396222  | -2.014204 | -1.457065 |
| H | 0.812869  | -2.890396 | 0.010190  |
| H | -3.643572 | -1.636509 | -0.102369 |
| H | -4.608795 | -0.210335 | 1.622440  |
| H | -2.946881 | -0.589087 | 2.093499  |
| H | -3.337875 | 1.001816  | 1.404081  |
| H | -5.220265 | 0.108160  | -0.823968 |
| H | -4.023829 | -0.206507 | -2.091215 |
| H | -3.877280 | 1.243694  | -1.085645 |
| H | -1.029970 | 2.500502  | -0.439096 |
| H | -0.035995 | 2.636908  | 1.431868  |
| H | 1.588304  | 3.480148  | 1.175519  |
| H | 3.593657  | -1.875295 | 0.700668  |
| H | 0.321168  | -0.791247 | 2.141097  |
| H | 1.807416  | -1.711457 | 1.957475  |
| H | 1.850035  | 0.067299  | 2.032503  |

M062X energy = -737.356251442 a.u.

(1R,5S,6S,7S,10R)-2, Conf. F

|   |           |           |           |
|---|-----------|-----------|-----------|
| C | 3.391248  | 0.443978  | -0.235385 |
| C | 2.649811  | 1.734160  | -0.620043 |
| C | 1.280315  | 1.743222  | 0.013021  |
| C | 0.451413  | 0.533318  | -0.373194 |
| C | 1.159828  | -0.758122 | 0.128942  |
| C | 2.550770  | -0.798262 | -0.535342 |
| C | -1.023900 | 0.609678  | 0.033952  |
| C | -1.801775 | -0.619304 | -0.444858 |
| C | -1.125763 | -1.900176 | 0.060347  |
| C | 0.347929  | -1.976826 | -0.339119 |
| C | -3.305346 | -0.592121 | -0.073344 |
| C | -3.560704 | -0.066073 | 1.341402  |
| C | -4.153789 | 0.180801  | -1.086456 |
| O | -1.642820 | 1.751213  | -0.540537 |
| C | 0.912153  | 2.679885  | 0.890746  |
| O | 3.202634  | -1.977977 | -0.097781 |
| H | 0.453999  | 0.485511  | -1.476368 |
| C | 1.305967  | -0.779774 | 1.657527  |
| H | 3.637350  | 0.454258  | 0.832121  |
| H | 4.340618  | 0.381141  | -0.783448 |
| H | 3.226788  | 2.613564  | -0.318570 |
| H | 2.542196  | 1.769794  | -1.713390 |
| H | 2.382857  | -0.846890 | -1.626830 |
| H | -1.084903 | 0.663865  | 1.133685  |
| H | -1.728143 | -0.615053 | -1.544113 |
| H | -1.657397 | -2.765773 | -0.351310 |
| H | -1.233637 | -1.970420 | 1.151026  |
| H | 0.409642  | -2.034263 | -1.436102 |
| H | 0.812696  | -2.887949 | 0.051048  |
| H | -3.640760 | -1.639459 | -0.101315 |
| H | -4.611462 | -0.205567 | 1.614669  |
| H | -2.950570 | -0.582437 | 2.091562  |
| H | -3.339449 | 1.005356  | 1.394407  |
| H | -5.217155 | 0.100026  | -0.834827 |
| H | -4.016502 | -0.217728 | -2.097422 |
| H | -3.874868 | 1.236399  | -1.096767 |
| H | -1.029073 | 2.495701  | -0.453699 |

|   |           |           |           |
|---|-----------|-----------|-----------|
| H | -0.047985 | 2.660647  | 1.400699  |
| H | 1.579237  | 3.498503  | 1.146245  |
| H | 4.070045  | -2.016543 | -0.524016 |
| H | 0.334690  | -0.873466 | 2.150966  |
| H | 1.921859  | -1.634014 | 1.950940  |
| H | 1.772481  | 0.132608  | 2.038190  |

M062X energy = -737.356232023 a.u.

(1R,5S,6S,7S,10R)-2, Conf. G

|   |           |           |           |
|---|-----------|-----------|-----------|
| C | 3.458502  | 0.005252  | -0.141182 |
| C | 2.958788  | 1.368076  | -0.635499 |
| C | 1.573909  | 1.674790  | -0.114297 |
| C | 0.564719  | 0.585792  | -0.428384 |
| C | 1.046111  | -0.767950 | 0.177167  |
| C | 2.435039  | -1.081718 | -0.432850 |
| C | -0.888247 | 0.891768  | -0.044012 |
| C | -1.833460 | -0.230953 | -0.500704 |
| C | -1.394707 | -1.570969 | 0.097527  |
| C | 0.066591  | -1.881104 | -0.232515 |
| C | -3.313501 | 0.124837  | -0.243047 |
| C | -4.250418 | -0.993296 | -0.704693 |
| C | -3.602303 | 0.500436  | 1.212551  |
| O | -1.326405 | 2.143353  | -0.551235 |
| C | 1.314432  | 2.776696  | 0.588774  |
| O | 2.974947  | -2.299172 | 0.049335  |
| H | 0.574238  | 0.446064  | -1.527933 |
| C | 1.154665  | -0.701512 | 1.707104  |
| H | 3.647197  | 0.034768  | 0.937770  |
| H | 4.402727  | -0.263233 | -0.625313 |
| H | 3.657122  | 2.160481  | -0.349809 |
| H | 2.927142  | 1.348810  | -1.735473 |
| H | 2.300489  | -1.142066 | -1.528932 |
| H | -0.948987 | 0.994421  | 1.047133  |
| H | -1.715042 | -0.312044 | -1.596569 |
| H | -2.024676 | -2.378703 | -0.289450 |
| H | -1.541536 | -1.560602 | 1.184765  |
| H | 0.151840  | -2.042363 | -1.318817 |
| H | 0.356189  | -2.819845 | 0.258181  |
| H | -3.520113 | 1.012776  | -0.850876 |
| H | -4.001795 | -1.335131 | -1.716166 |
| H | -4.201697 | -1.859355 | -0.035248 |
| H | -5.288013 | -0.645041 | -0.712348 |
| H | -4.673707 | 0.679759  | 1.349549  |
| H | -3.075268 | 1.413708  | 1.502553  |
| H | -3.314823 | -0.301058 | 1.903384  |
| H | -1.044171 | 2.202571  | -1.476207 |
| H | 0.319115  | 3.018337  | 0.943191  |
| H | 2.106282  | 3.489919  | 0.803845  |
| H | 2.423061  | -3.023288 | -0.277061 |
| H | 1.646300  | 0.217018  | 2.038219  |
| H | 0.172279  | -0.734026 | 2.186666  |
| H | 1.736799  | -1.556194 | 2.064509  |

M062X energy = -737.354807713 a.u.

(1R,5S,6S,7S,10R)-2, Conf. H

|   |          |          |           |
|---|----------|----------|-----------|
| C | 3.452916 | 0.009980 | -0.129820 |
|---|----------|----------|-----------|



|   |           |           |           |
|---|-----------|-----------|-----------|
| C | 2.958851  | 1.371877  | -0.632931 |
| C | 1.573508  | 1.675805  | -0.111562 |
| C | 0.566000  | 0.587928  | -0.432840 |
| C | 1.040036  | -0.772577 | 0.165028  |
| C | 2.429281  | -1.082790 | -0.426641 |
| C | -0.887649 | 0.892090  | -0.047334 |
| C | -1.835239 | -0.228394 | -0.505282 |
| C | -1.391660 | -1.578332 | 0.068850  |
| C | 0.068173  | -1.881947 | -0.270345 |
| C | -3.313328 | 0.125455  | -0.232308 |
| C | -4.253696 | -0.988646 | -0.696500 |
| C | -3.589760 | 0.486199  | 1.229468  |
| O | -1.323037 | 2.146086  | -0.551926 |
| C | 1.316178  | 2.774332  | 0.597228  |
| O | 2.845101  | -2.337980 | 0.084179  |
| H | 0.576650  | 0.454759  | -1.532737 |
| C | 1.127679  | -0.714793 | 1.697861  |
| H | 3.634049  | 0.043995  | 0.950219  |
| H | 4.407716  | -0.244886 | -0.609297 |
| H | 3.657575  | 2.164804  | -0.349642 |
| H | 2.927735  | 1.347050  | -1.732712 |
| H | 2.303820  | -1.150645 | -1.523402 |
| H | -0.948169 | 0.996499  | 1.043125  |
| H | -1.725446 | -0.296599 | -1.603324 |
| H | -2.021863 | -2.378282 | -0.333837 |
| H | -1.540942 | -1.590106 | 1.155930  |
| H | 0.155422  | -2.009164 | -1.359971 |
| H | 0.382674  | -2.828034 | 0.181379  |
| H | -3.527115 | 1.019345  | -0.829213 |
| H | -4.013855 | -1.320170 | -1.713490 |
| H | -4.197073 | -1.861298 | -0.036478 |
| H | -5.291716 | -0.641362 | -0.690930 |
| H | -4.660625 | 0.658852  | 1.379153  |
| H | -3.064300 | 1.399367  | 1.522752  |
| H | -3.290772 | -0.320383 | 1.909337  |
| H | -1.118708 | 2.167313  | -1.499022 |
| H | 0.320908  | 3.015678  | 0.951731  |
| H | 2.108613  | 3.485813  | 0.816244  |
| H | 3.733273  | -2.517075 | -0.254433 |
| H | 1.650212  | 0.182529  | 2.040820  |
| H | 0.135783  | -0.704663 | 2.157723  |
| H | 1.661894  | -1.595308 | 2.064817  |

M062X energy = -737.354552551 a.u.

(1R,5S,6S,7S,10R)-2, Conf. I

|   |           |           |           |
|---|-----------|-----------|-----------|
| C | 3.458578  | 0.012492  | -0.167257 |
| C | 2.951367  | 1.379108  | -0.644298 |
| C | 1.573105  | 1.673294  | -0.100655 |
| C | 0.565588  | 0.589034  | -0.430035 |
| C | 1.039605  | -0.775168 | 0.156814  |
| C | 2.435500  | -1.088977 | -0.435447 |
| C | -0.889567 | 0.894604  | -0.049763 |
| C | -1.837830 | -0.226422 | -0.505166 |
| C | -1.391718 | -1.577474 | 0.065870  |
| C | 0.065679  | -1.877950 | -0.285907 |
| C | -3.315173 | 0.127086  | -0.228362 |

|   |           |           |           |
|---|-----------|-----------|-----------|
| C | -4.256681 | -0.985431 | -0.694072 |
| C | -3.589080 | 0.483690  | 1.234903  |
| O | -1.320924 | 2.148188  | -0.557404 |
| C | 1.319271  | 2.758075  | 0.629963  |
| O | 2.921653  | -2.352641 | -0.016537 |
| H | 0.580460  | 0.460818  | -1.530509 |
| C | 1.117980  | -0.726320 | 1.689538  |
| H | 3.668595  | 0.057814  | 0.910572  |
| H | 4.397048  | -0.251935 | -0.665615 |
| H | 3.652806  | 2.170212  | -0.362274 |
| H | 2.904720  | 1.366435  | -1.743436 |
| H | 2.308948  | -1.186063 | -1.523371 |
| H | -0.954329 | 1.003253  | 1.039840  |
| H | -1.730963 | -0.294489 | -1.603439 |
| H | -2.024997 | -2.376430 | -0.333757 |
| H | -1.533392 | -1.591050 | 1.154220  |
| H | 0.145430  | -1.989843 | -1.377529 |
| H | 0.385338  | -2.831541 | 0.146776  |
| H | -3.529605 | 1.022746  | -0.822406 |
| H | -5.294460 | -0.637593 | -0.686257 |
| H | -4.018398 | -1.314502 | -1.712177 |
| H | -4.199737 | -1.859759 | -0.036289 |
| H | -3.063847 | 1.396390  | 1.530154  |
| H | -3.288900 | -0.324919 | 1.911952  |
| H | -4.659718 | 0.655461  | 1.386895  |
| H | -1.123632 | 2.163917  | -1.506131 |
| H | 0.326062  | 2.990620  | 0.996549  |
| H | 2.110686  | 3.469216  | 0.853521  |
| H | 3.259502  | -2.251307 | 0.885071  |
| H | 1.532991  | -1.665010 | 2.074038  |
| H | 1.732950  | 0.105491  | 2.044056  |
| H | 0.130864  | -0.610144 | 2.144315  |

M062X energy = -737.354470376 a.u.

(1R,5S,6S,7S,10R)-2, Conf. J

|   |           |           |           |
|---|-----------|-----------|-----------|
| C | 3.413775  | 0.418682  | -0.185520 |
| C | 2.691078  | 1.712797  | -0.578247 |
| C | 1.293550  | 1.763360  | -0.005881 |
| C | 0.455847  | 0.552038  | -0.372889 |
| C | 1.162014  | -0.743992 | 0.130607  |
| C | 2.564003  | -0.795894 | -0.526312 |
| C | -1.016735 | 0.607647  | 0.057507  |
| C | -1.792898 | -0.617512 | -0.449770 |
| C | -1.122933 | -1.905751 | 0.041507  |
| C | 0.356661  | -1.968815 | -0.334872 |
| C | -3.298955 | -0.600297 | -0.091322 |
| C | -3.565245 | -0.125130 | 1.339574  |
| C | -4.143347 | 0.207411  | -1.080765 |
| O | -1.642460 | 1.812828  | -0.358998 |
| C | 0.893291  | 2.761217  | 0.781265  |
| O | 3.301227  | -1.940612 | -0.135881 |
| H | 0.454683  | 0.485552  | -1.479230 |
| C | 1.303819  | -0.759044 | 1.659041  |
| H | 3.629465  | 0.411184  | 0.888744  |
| H | 4.372595  | 0.332908  | -0.706463 |
| H | 3.265767  | 2.586709  | -0.257069 |

|   |           |           |           |
|---|-----------|-----------|-----------|
| H | 2.626735  | 1.756012  | -1.676092 |
| H | 2.407348  | -0.809160 | -1.621040 |
| H | -1.062767 | 0.637236  | 1.153557  |
| H | -1.711848 | -0.606753 | -1.551339 |
| H | -1.645407 | -2.769552 | -0.385494 |
| H | -1.242207 | -1.986121 | 1.129802  |
| H | 0.435219  | -2.046272 | -1.430805 |
| H | 0.799892  | -2.880384 | 0.087561  |
| H | -3.634981 | -1.645429 | -0.161283 |
| H | -4.616852 | -0.279808 | 1.600830  |
| H | -2.958277 | -0.666156 | 2.074546  |
| H | -3.349596 | 0.944124  | 1.434614  |
| H | -5.209540 | 0.088674  | -0.859596 |
| H | -3.977133 | -0.130299 | -2.109961 |
| H | -3.897621 | 1.269989  | -1.019262 |
| H | -1.469555 | 1.922011  | -1.306503 |
| H | -0.113848 | 2.822605  | 1.176603  |
| H | 1.574124  | 3.572118  | 1.028013  |
| H | 2.859245  | -2.721160 | -0.497678 |
| H | 1.663118  | 0.199995  | 2.041196  |
| H | 0.351349  | -0.968464 | 2.154324  |
| H | 2.016394  | -1.537579 | 1.947513  |

M062X energy = -737.354251269 a.u.

(1R,5S,6R,7R,8R,10R)-3, Conf. A

|   |           |           |           |
|---|-----------|-----------|-----------|
| C | 4.441343  | -0.712262 | 0.435056  |
| C | 4.334926  | 0.811203  | 0.600119  |
| C | 2.911989  | 1.246358  | 0.859625  |
| C | 1.946819  | 0.722156  | -0.177876 |
| C | 1.976793  | -0.846617 | -0.207152 |
| C | 3.422007  | -1.242935 | -0.572772 |
| C | 0.499168  | 1.146969  | -0.059316 |
| C | -0.291464 | 0.684000  | -1.286284 |
| C | -0.389545 | -0.830390 | -1.335869 |
| C | 1.034543  | -1.405674 | -1.302934 |
| O | 0.282689  | 2.567248  | -0.024125 |
| C | -0.955962 | 2.837686  | -0.532244 |
| C | -1.472587 | 1.604103  | -1.221369 |
| O | 3.468421  | -2.655555 | -0.666281 |
| C | 2.563508  | 1.998750  | 1.901094  |
| C | -2.725109 | 1.506357  | -1.654709 |
| O | -1.482164 | 3.908301  | -0.428243 |
| H | 2.307840  | 1.071422  | -1.160924 |
| C | 1.611705  | -1.447600 | 1.162487  |
| O | -1.123767 | -1.318716 | -0.201811 |
| C | -2.402041 | -1.713340 | -0.388526 |
| O | -2.975673 | -1.650915 | -1.449060 |
| C | -3.009552 | -2.215878 | 0.897983  |
| C | -3.707359 | -1.092090 | 1.695020  |
| C | -2.725664 | -0.000435 | 2.123236  |
| C | -4.879286 | -0.496030 | 0.915505  |
| H | 4.280795  | -1.214882 | 1.394726  |
| H | 5.451941  | -0.979673 | 0.099112  |
| H | 4.680025  | 1.287952  | -0.329352 |
| H | 4.994706  | 1.157725  | 1.400878  |

|   |           |           |           |
|---|-----------|-----------|-----------|
| H | 3.642104  | -0.797045 | -1.560327 |
| H | 0.055537  | 0.726024  | 0.852824  |
| H | 0.300107  | 0.982885  | -2.166841 |
| H | -0.908098 | -1.160019 | -2.239875 |
| H | 1.477978  | -1.196119 | -2.286591 |
| H | 0.985728  | -2.494188 | -1.208507 |
| H | 4.382218  | -2.914067 | -0.850586 |
| H | 3.308151  | 2.329567  | 2.620122  |
| H | 1.544145  | 2.335580  | 2.057504  |
| H | -3.096359 | 0.614283  | -2.149301 |
| H | -3.402858 | 2.341701  | -1.498784 |
| H | 1.876979  | -2.508553 | 1.166070  |
| H | 0.542773  | -1.368145 | 1.365528  |
| H | 2.147268  | -0.950495 | 1.975095  |
| H | -3.741640 | -2.981902 | 0.628157  |
| H | -2.223271 | -2.668628 | 1.509027  |
| H | -4.102223 | -1.573989 | 2.598490  |
| H | -2.380720 | 0.569584  | 1.253292  |
| H | -3.208861 | 0.702234  | 2.808757  |
| H | -1.846888 | -0.420701 | 2.625038  |
| H | -4.527179 | 0.003198  | 0.006437  |
| H | -5.406449 | 0.244995  | 1.524112  |
| H | -5.595186 | -1.267648 | 0.615634  |

M062X energy = -1154.62605861 a.u.

(1R,5S,6R,7R,8R,10R)-3, Conf. B

|   |           |           |           |
|---|-----------|-----------|-----------|
| C | 4.454104  | -0.690901 | 0.409558  |
| C | 4.324685  | 0.827202  | 0.605400  |
| C | 2.897656  | 1.238934  | 0.877759  |
| C | 1.939685  | 0.725410  | -0.170949 |
| C | 1.976258  | -0.841692 | -0.219696 |
| C | 3.429757  | -1.235620 | -0.586183 |
| C | 0.491445  | 1.150138  | -0.058072 |
| C | -0.296031 | 0.692390  | -1.288785 |
| C | -0.387301 | -0.822427 | -1.348746 |
| C | 1.040325  | -1.387692 | -1.325632 |
| O | 0.275435  | 2.569962  | -0.017002 |
| C | -0.964135 | 2.840988  | -0.523619 |
| C | -1.479317 | 1.609553  | -1.218295 |
| O | 3.574689  | -2.633053 | -0.760700 |
| C | 2.538755  | 1.962380  | 1.936018  |
| C | -2.732227 | 1.511667  | -1.650471 |
| O | -1.492104 | 3.909999  | -0.414047 |
| H | 2.307338  | 1.084307  | -1.148220 |
| C | 1.602105  | -1.456378 | 1.140112  |
| O | -1.110968 | -1.324049 | -0.213085 |
| C | -2.391858 | -1.714942 | -0.393308 |
| O | -2.972717 | -1.643463 | -1.449032 |
| C | -2.991796 | -2.225068 | 0.893727  |
| C | -3.693784 | -1.107150 | 1.695431  |
| C | -2.716680 | -0.010655 | 2.121711  |
| C | -4.871957 | -0.516164 | 0.921497  |
| H | 4.320184  | -1.197755 | 1.374964  |
| H | 5.455891  | -0.949266 | 0.051615  |
| H | 4.659577  | 1.324681  | -0.316571 |
| H | 4.983827  | 1.167691  | 1.409362  |

|   |           |           |           |
|---|-----------|-----------|-----------|
| H | 3.643100  | -0.806901 | -1.575787 |
| H | 0.042486  | 0.726924  | 0.850202  |
| H | 0.295349  | 0.999354  | -2.166675 |
| H | -0.908788 | -1.148703 | -2.252219 |
| H | 1.483578  | -1.155474 | -2.304033 |
| H | 1.002043  | -2.478659 | -1.256561 |
| H | 3.644175  | -3.034840 | 0.117440  |
| H | 3.278267  | 2.287084  | 2.663048  |
| H | 1.515099  | 2.283583  | 2.098233  |
| H | -3.102586 | 0.621532  | -2.149141 |
| H | -3.411118 | 2.345182  | -1.489832 |
| H | 0.549472  | -1.303636 | 1.382157  |
| H | 2.198426  | -1.037371 | 1.954369  |
| H | 1.759252  | -2.540722 | 1.108126  |
| H | -3.720151 | -2.994867 | 0.624500  |
| H | -2.201015 | -2.674646 | 1.501337  |
| H | -4.082432 | -1.593003 | 2.599458  |
| H | -3.201665 | 0.689872  | 2.808107  |
| H | -1.835070 | -0.426567 | 2.622417  |
| H | -2.376291 | 0.561049  | 1.251009  |
| H | -5.583704 | -1.291449 | 0.621314  |
| H | -4.526085 | -0.011555 | 0.013062  |
| H | -5.401963 | 0.219139  | 1.534505  |

M062X energy = -1154.62581074 a.u.

(1R,5S,6R,7R,8R,10R)-3, Conf. C

|   |           |           |           |
|---|-----------|-----------|-----------|
| C | 4.357435  | -1.006686 | 0.565304  |
| C | 4.339986  | 0.495993  | 0.882085  |
| C | 2.933855  | 1.005220  | 1.095857  |
| C | 2.010427  | 0.659610  | -0.049269 |
| C | 1.941300  | -0.895877 | -0.242902 |
| C | 3.379915  | -1.356488 | -0.556181 |
| C | 0.588291  | 1.172104  | 0.024264  |
| C | -0.146265 | 0.893370  | -1.290492 |
| C | -0.333579 | -0.597477 | -1.510830 |
| C | 1.045408  | -1.270881 | -1.449994 |
| O | 0.463058  | 2.593477  | 0.194820  |
| C | -0.718880 | 3.001311  | -0.355253 |
| C | -1.268857 | 1.882336  | -1.197238 |
| O | 3.340107  | -2.751690 | -0.797000 |
| C | 2.564185  | 1.672843  | 2.186645  |
| C | -2.498016 | 1.915061  | -1.701487 |
| O | -1.179651 | 4.091168  | -0.171273 |
| H | 2.459747  | 1.080761  | -0.965494 |
| C | 1.442017  | -1.605044 | 1.029148  |
| O | -1.176575 | -1.152161 | -0.487645 |
| C | -2.460528 | -1.425751 | -0.801364 |
| O | -2.951056 | -1.204325 | -1.881888 |
| C | -3.206451 | -2.007328 | 0.372643  |
| C | -3.997749 | -0.922228 | 1.128214  |
| C | -4.873931 | -1.578787 | 2.193903  |
| C | -3.065307 | 0.115748  | 1.753031  |
| H | 4.095397  | -1.589762 | 1.454541  |
| H | 5.369673  | -1.311986 | 0.268890  |
| H | 4.780067  | 1.037138  | 0.031316  |
| H | 4.963211  | 0.711901  | 1.754773  |

|   |           |           |           |
|---|-----------|-----------|-----------|
| H | 3.698232  | -0.829057 | -1.474375 |
| H | 0.057291  | 0.694611  | 0.858778  |
| H | 0.520809  | 1.240628  | -2.096249 |
| H | -0.805357 | -0.793134 | -2.477106 |
| H | 1.569533  | -0.991641 | -2.374889 |
| H | 0.921594  | -2.357211 | -1.477499 |
| H | 4.246724  | -3.057661 | -0.939353 |
| H | 3.277155  | 1.875010  | 2.981462  |
| H | 1.560881  | 2.065589  | 2.313622  |
| H | -2.897861 | 1.104349  | -2.301753 |
| H | -3.127470 | 2.776441  | -1.494157 |
| H | 0.369098  | -1.469508 | 1.172150  |
| H | 1.950591  | -1.233393 | 1.922234  |
| H | 1.636137  | -2.677305 | 0.936717  |
| H | -3.897720 | -2.756073 | -0.024632 |
| H | -2.502944 | -2.495128 | 1.055325  |
| H | -4.645461 | -0.420988 | 0.396777  |
| H | -5.560873 | -2.308804 | 1.754395  |
| H | -4.253145 | -2.099052 | 2.932878  |
| H | -5.467797 | -0.828590 | 2.724713  |
| H | -2.495909 | 0.657577  | 0.992177  |
| H | -2.352409 | -0.368717 | 2.432091  |
| H | -3.635771 | 0.849946  | 2.330054  |

M062X energy = -1154.62534577 a.u.

(1R,5S,6R,7R,8R,10R)-3, Conf. D

|   |           |           |           |
|---|-----------|-----------|-----------|
| C | 4.448593  | -0.708132 | 0.437738  |
| C | 4.332503  | 0.813638  | 0.607371  |
| C | 2.909029  | 1.250711  | 0.860393  |
| C | 1.946341  | 0.723607  | -0.178137 |
| C | 1.982791  | -0.844372 | -0.199021 |
| C | 3.435818  | -1.239569 | -0.568732 |
| C | 0.497916  | 1.146456  | -0.062738 |
| C | -0.290697 | 0.676956  | -1.288691 |
| C | -0.390882 | -0.836966 | -1.327491 |
| C | 1.034802  | -1.411188 | -1.286089 |
| O | 0.277249  | 2.566036  | -0.034062 |
| C | -0.960984 | 2.831976  | -0.544977 |
| C | -1.473735 | 1.594782  | -1.230854 |
| O | 3.612958  | -2.643167 | -0.629909 |
| C | 2.555364  | 2.007381  | 1.897081  |
| C | -2.724836 | 1.492338  | -1.667021 |
| O | -1.490649 | 3.901153  | -0.446080 |
| H | 2.309316  | 1.070705  | -1.161636 |
| C | 1.626333  | -1.444627 | 1.171781  |
| O | -1.122874 | -1.318785 | -0.191330 |
| C | -2.401365 | -1.718505 | -0.377218 |
| O | -2.969998 | -1.668109 | -1.440698 |
| C | -3.010339 | -2.209607 | 0.912475  |
| C | -3.708645 | -1.079086 | 1.699913  |
| C | -2.727141 | 0.015016  | 2.122090  |
| C | -4.879088 | -0.488609 | 0.914027  |
| H | 4.289120  | -1.215508 | 1.395182  |
| H | 5.451402  | -0.982340 | 0.096193  |
| H | 4.682453  | 1.294780  | -0.318173 |
| H | 4.986910  | 1.159660  | 1.412776  |

|   |           |           |           |
|---|-----------|-----------|-----------|
| H | 3.656982  | -0.791222 | -1.554625 |
| H | 0.054924  | 0.727248  | 0.850743  |
| H | 0.301972  | 0.970596  | -2.170334 |
| H | -0.907573 | -1.173924 | -2.229958 |
| H | 1.472583  | -1.215306 | -2.276916 |
| H | 0.962270  | -2.499038 | -1.170529 |
| H | 3.155069  | -2.975477 | -1.414252 |
| H | 3.297076  | 2.340372  | 2.618062  |
| H | 1.535586  | 2.345476  | 2.048170  |
| H | -3.093363 | 0.597892  | -2.159402 |
| H | -3.404806 | 2.326760  | -1.516021 |
| H | 1.931529  | -2.495466 | 1.185922  |
| H | 0.554050  | -1.400496 | 1.369004  |
| H | 2.141477  | -0.924232 | 1.982611  |
| H | -3.742429 | -2.977437 | 0.647965  |
| H | -2.224932 | -2.657562 | 1.528188  |
| H | -4.105055 | -1.554640 | 2.605979  |
| H | -3.210993 | 0.721787  | 2.802822  |
| H | -1.848797 | -0.401935 | 2.627335  |
| H | -2.381577 | 0.579982  | 1.249113  |
| H | -5.406903 | 0.257052  | 1.516278  |
| H | -5.594895 | -1.262081 | 0.618789  |
| H | -4.525534 | 0.004140  | 0.001935  |

M062X energy = -1154.62534038 a.u.

(1R,5S,6R,7R,8R,10R)-3, Conf. E

|   |           |           |           |
|---|-----------|-----------|-----------|
| C | 4.370590  | -0.989464 | 0.539153  |
| C | 4.328862  | 0.504783  | 0.892065  |
| C | 2.916513  | 0.989674  | 1.117793  |
| C | 2.002065  | 0.661921  | -0.039025 |
| C | 1.939408  | -0.889339 | -0.259187 |
| C | 3.386165  | -1.347919 | -0.574118 |
| C | 0.580275  | 1.176335  | 0.030330  |
| C | -0.150003 | 0.910005  | -1.289189 |
| C | -0.331586 | -0.579379 | -1.526291 |
| C | 1.051592  | -1.243716 | -1.476845 |
| O | 0.456658  | 2.595908  | 0.213379  |
| C | -0.725130 | 3.008484  | -0.334446 |
| C | -1.273890 | 1.896863  | -1.187341 |
| O | 3.449911  | -2.725768 | -0.893164 |
| C | 2.533230  | 1.622108  | 2.224714  |
| C | -2.502730 | 1.933469  | -1.692054 |
| O | -1.186632 | 4.096183  | -0.140762 |
| H | 2.459313  | 1.095431  | -0.945694 |
| C | 1.429813  | -1.616550 | 0.997141  |
| O | -1.165042 | -1.152377 | -0.504773 |
| C | -2.452225 | -1.420549 | -0.811958 |
| O | -2.951147 | -1.182646 | -1.884793 |
| C | -3.189151 | -2.018956 | 0.359329  |
| C | -3.985467 | -0.946370 | 1.127146  |
| C | -4.848048 | -1.617278 | 2.194897  |
| C | -3.057989 | 0.096498  | 1.751154  |
| H | 4.133724  | -1.583614 | 1.432313  |
| H | 5.375995  | -1.282298 | 0.219999  |
| H | 4.760286  | 1.070596  | 0.053375  |
| H | 4.950667  | 0.709448  | 1.768559  |

|   |           |           |           |
|---|-----------|-----------|-----------|
| H | 3.697537  | -0.833076 | -1.494232 |
| H | 0.042922  | 0.694097  | 0.857806  |
| H | 0.518271  | 1.267600  | -2.089385 |
| H | -0.806506 | -0.766698 | -2.492652 |
| H | 1.577217  | -0.938445 | -2.392371 |
| H | 0.938916  | -2.330204 | -1.534595 |
| H | 3.430538  | -3.222512 | -0.062332 |
| H | 3.239801  | 1.813024  | 3.027952  |
| H | 1.524367  | 1.998991  | 2.356944  |
| H | -2.901677 | 1.128139  | -2.300057 |
| H | -3.132848 | 2.792543  | -1.477333 |
| H | 0.374923  | -1.414824 | 1.187554  |
| H | 1.992758  | -1.330922 | 1.889172  |
| H | 1.518007  | -2.699832 | 0.854989  |
| H | -3.876254 | -2.769518 | -0.041803 |
| H | -2.479480 | -2.507531 | 1.035109  |
| H | -4.642578 | -0.446762 | 0.403124  |
| H | -4.217453 | -2.135491 | 2.927007  |
| H | -5.445640 | -0.875815 | 2.733676  |
| H | -5.530805 | -2.351482 | 1.755901  |
| H | -2.335833 | -0.385263 | 2.422495  |
| H | -3.630532 | 0.822268  | 2.336634  |
| H | -2.499382 | 0.648027  | 0.989139  |

M062X energy = -1154.62511660 a.u.

(1R,5S,6R,7R,8R,10R)-3, Conf. F

|   |           |           |           |
|---|-----------|-----------|-----------|
| C | 3.818744  | -1.892340 | 0.073161  |
| C | 4.246208  | -0.536014 | 0.653401  |
| C | 3.054439  | 0.289691  | 1.077028  |
| C | 2.032311  | 0.443987  | -0.025017 |
| C | 1.511751  | -0.964129 | -0.486434 |
| C | 2.746177  | -1.731008 | -1.003503 |
| C | 0.820107  | 1.301600  | 0.265682  |
| C | -0.006047 | 1.503164  | -1.006858 |
| C | -0.620659 | 0.198598  | -1.474953 |
| C | 0.500634  | -0.835552 | -1.652573 |
| O | 1.102088  | 2.641300  | 0.704713  |
| C | 0.050577  | 3.444083  | 0.358596  |
| C | -0.819417 | 2.697261  | -0.614642 |
| O | 2.299496  | -2.985095 | -1.487055 |
| C | 2.929176  | 0.806294  | 2.297598  |
| C | -2.032045 | 3.113374  | -0.961573 |
| O | -0.088127 | 4.554025  | 0.785468  |
| H | 2.551549  | 0.895390  | -0.888232 |
| C | 0.872499  | -1.745126 | 0.675636  |
| O | -1.564538 | -0.250748 | -0.488697 |
| C | -2.877755 | -0.199416 | -0.799745 |
| O | -3.300892 | 0.185195  | -1.861881 |
| C | -3.743372 | -0.637851 | 0.359331  |
| C | -3.152216 | -1.723347 | 1.264496  |
| C | -4.130511 | -2.035335 | 2.396988  |
| C | -2.816299 | -2.986586 | 0.472113  |
| H | 3.427781  | -2.541986 | 0.863560  |
| H | 4.689558  | -2.402547 | -0.359312 |
| H | 4.795335  | 0.018035  | -0.122353 |
| H | 4.933689  | -0.676693 | 1.492544  |

|   |           |           |           |
|---|-----------|-----------|-----------|
| H | 3.171495  | -1.140831 | -1.836111 |
| H | 0.201019  | 0.828344  | 1.039248  |
| H | 0.699070  | 1.823543  | -1.790488 |
| H | -1.157071 | 0.330128  | -2.417455 |
| H | 1.047461  | -0.544232 | -2.560547 |
| H | 0.064128  | -1.818239 | -1.856191 |
| H | 3.074208  | -3.491718 | -1.768074 |
| H | 3.696497  | 0.644206  | 3.049842  |
| H | 2.086393  | 1.428379  | 2.579849  |
| H | -2.654324 | 2.558385  | -1.657611 |
| H | -2.419497 | 4.033738  | -0.533440 |
| H | -0.119587 | -1.360581 | 0.917298  |
| H | 1.483454  | -1.697086 | 1.580658  |
| H | 0.762377  | -2.793156 | 0.381575  |
| H | -3.948457 | 0.267538  | 0.946906  |
| H | -4.698151 | -0.960153 | -0.069134 |
| H | -2.227275 | -1.329916 | 1.703299  |
| H | -4.363675 | -1.141159 | 2.984045  |
| H | -5.071196 | -2.430118 | 1.995471  |
| H | -3.714692 | -2.787111 | 3.074554  |
| H | -2.396984 | -3.755962 | 1.127965  |
| H | -2.083896 | -2.783707 | -0.315748 |
| H | -3.719224 | -3.398003 | 0.005111  |

M062X energy = -1154.62468123 a.u.

(1R,5S,6R,7R,8R,10R)-3, Conf. G

|   |           |           |           |
|---|-----------|-----------|-----------|
| C | 4.367915  | -0.994585 | 0.571452  |
| C | 4.336601  | 0.507098  | 0.889569  |
| C | 2.929169  | 1.015515  | 1.096263  |
| C | 2.009163  | 0.662846  | -0.049641 |
| C | 1.949640  | -0.893702 | -0.231744 |
| C | 3.397496  | -1.350288 | -0.547591 |
| C | 0.585164  | 1.170521  | 0.019072  |
| C | -0.146324 | 0.881597  | -1.295273 |
| C | -0.333479 | -0.610528 | -1.502187 |
| C | 1.047793  | -1.281203 | -1.430670 |
| O | 0.452789  | 2.592019  | 0.181000  |
| C | -0.729330 | 2.992303  | -0.373650 |
| C | -1.272594 | 1.867070  | -1.212020 |
| O | 3.490150  | -2.749515 | -0.744015 |
| C | 2.553017  | 1.688676  | 2.181481  |
| C | -2.499650 | 1.893004  | -1.721625 |
| O | -1.195976 | 4.080603  | -0.196656 |
| H | 2.459683  | 1.081170  | -0.966995 |
| C | 1.460308  | -1.601756 | 1.043233  |
| O | -1.173876 | -1.158348 | -0.475495 |
| C | -2.458117 | -1.438250 | -0.789521 |
| O | -2.942891 | -1.232496 | -1.875367 |
| C | -3.206568 | -2.004616 | 0.389652  |
| C | -3.998058 | -0.909926 | 1.131789  |
| C | -4.878919 | -1.554913 | 2.200705  |
| C | -3.065786 | 0.132174  | 1.749876  |
| H | 4.108321  | -1.581529 | 1.458961  |
| H | 5.373026  | -1.303631 | 0.268640  |
| H | 4.780074  | 1.051747  | 0.042636  |
| H | 4.953548  | 0.725416  | 1.766142  |

|   |           |           |           |
|---|-----------|-----------|-----------|
| H | 3.715343  | -0.821686 | -1.464946 |
| H | 0.055624  | 0.694302  | 0.855498  |
| H | 0.521448  | 1.223512  | -2.102787 |
| H | -0.802920 | -0.816565 | -2.467519 |
| H | 1.565642  | -1.015634 | -2.365025 |
| H | 0.900634  | -2.367676 | -1.436267 |
| H | 3.064550  | -2.969542 | -1.584087 |
| H | 3.262427  | 1.895948  | 2.978100  |
| H | 1.548678  | 2.080688  | 2.302664  |
| H | -2.894968 | 1.078575  | -2.319865 |
| H | -3.132614 | 2.753409  | -1.521113 |
| H | 0.381828  | -1.502764 | 1.175858  |
| H | 1.948935  | -1.202301 | 1.935081  |
| H | 1.696931  | -2.667494 | 0.967051  |
| H | -3.898167 | -2.756833 | -0.000345 |
| H | -2.505036 | -2.485345 | 1.079336  |
| H | -4.642494 | -0.414801 | 0.393335  |
| H | -5.566074 | -2.287500 | 1.765888  |
| H | -4.261630 | -2.069353 | 2.946606  |
| H | -5.472813 | -0.798443 | 2.722382  |
| H | -2.493720 | 0.666909  | 0.986048  |
| H | -2.355466 | -0.347001 | 2.435291  |
| H | -3.637007 | 0.872092  | 2.318690  |

M062X energy = -1154.62462262 a.u.

(1R,5S,6R,7R,8R,10R)-3, Conf. H

|   |           |           |           |
|---|-----------|-----------|-----------|
| C | 3.520803  | -2.464823 | -0.047584 |
| C | 4.255569  | -1.158026 | 0.285984  |
| C | 3.304361  | -0.092771 | 0.778035  |
| C | 2.147956  | 0.136039  | -0.167252 |
| C | 1.334220  | -1.192132 | -0.364120 |
| C | 2.319937  | -2.218245 | -0.959991 |
| C | 1.159596  | 1.223453  | 0.193850  |
| C | 0.168194  | 1.444988  | -0.951093 |
| C | -0.719572 | 0.232074  | -1.154858 |
| C | 0.177011  | -0.995385 | -1.374478 |
| O | 1.730045  | 2.525437  | 0.407860  |
| C | 0.781887  | 3.469529  | 0.125963  |
| C | -0.355132 | 2.803007  | -0.598080 |
| O | 1.598333  | -3.411758 | -1.207071 |
| C | 3.475716  | 0.554678  | 1.928576  |
| C | -1.519477 | 3.404631  | -0.812577 |
| O | 0.905727  | 4.623140  | 0.421586  |
| H | 2.578685  | 0.400020  | -1.148773 |
| C | 0.782439  | -1.725226 | 0.970288  |
| O | -1.540093 | 0.039386  | 0.009143  |
| C | -2.859736 | 0.309033  | -0.091299 |
| O | -3.386111 | 0.721933  | -1.096809 |
| C | -3.584946 | -0.025684 | 1.187736  |
| C | -4.145646 | -1.465630 | 1.164500  |
| C | -5.181260 | -1.648982 | 0.055098  |
| C | -3.030827 | -2.506861 | 1.057331  |
| H | 3.171974  | -2.953979 | 0.868094  |
| H | 4.210227  | -3.162910 | -0.540676 |
| H | 4.746487  | -0.790757 | -0.627484 |
| H | 5.044406  | -1.338041 | 1.022134  |

|   |           |           |           |
|---|-----------|-----------|-----------|
| H | 2.686885  | -1.800460 | -1.915691 |
| H | 0.616976  | 0.950922  | 1.108443  |
| H | 0.770183  | 1.551832  | -1.867857 |
| H | -1.381463 | 0.369499  | -2.013294 |
| H | 0.605364  | -0.889208 | -2.381251 |
| H | -0.437499 | -1.900614 | -1.392911 |
| H | 2.221706  | -4.078676 | -1.527180 |
| H | 4.323457  | 0.330167  | 2.570355  |
| H | 2.806641  | 1.343957  | 2.254665  |
| H | -2.337479 | 2.910129  | -1.327667 |
| H | -1.664271 | 4.420156  | -0.454417 |
| H | -0.064859 | -1.133507 | 1.319700  |
| H | 1.544886  | -1.719012 | 1.753398  |
| H | 0.435590  | -2.752822 | 0.826019  |
| H | -2.899392 | 0.093178  | 2.031471  |
| H | -4.408039 | 0.686780  | 1.289362  |
| H | -4.648354 | -1.602402 | 2.130358  |
| H | -5.989127 | -0.915411 | 0.138544  |
| H | -4.724844 | -1.526178 | -0.932161 |
| H | -5.620331 | -2.650146 | 0.105176  |
| H | -2.518218 | -2.439662 | 0.090893  |
| H | -3.441773 | -3.517133 | 1.146356  |
| H | -2.277600 | -2.372831 | 1.840538  |

M062X energy = -1154.62435534 a.u.

(1R,5S,6R,7R,8R,10R)-3, Conf. I

|   |           |           |           |
|---|-----------|-----------|-----------|
| C | 3.819969  | -1.909390 | 0.044812  |
| C | 4.241791  | -0.560356 | 0.646064  |
| C | 3.049433  | 0.257545  | 1.081592  |
| C | 2.031973  | 0.428938  | -0.021566 |
| C | 1.500623  | -0.970859 | -0.492842 |
| C | 2.731680  | -1.752927 | -1.017045 |
| C | 0.830971  | 1.302359  | 0.269153  |
| C | 0.004335  | 1.513782  | -1.001306 |
| C | -0.621780 | 0.214852  | -1.471202 |
| C | 0.493271  | -0.823673 | -1.658361 |
| O | 1.130708  | 2.637730  | 0.708058  |
| C | 0.086411  | 3.452359  | 0.366394  |
| C | -0.795137 | 2.716110  | -0.604836 |
| O | 2.369655  | -3.003733 | -1.572535 |
| C | 2.918223  | 0.753532  | 2.310044  |
| C | -2.003580 | 3.147521  | -0.947696 |
| O | -0.039061 | 4.562931  | 0.795314  |
| H | 2.559113  | 0.876289  | -0.882294 |
| C | 0.849158  | -1.747179 | 0.663763  |
| O | -1.561681 | -0.236510 | -0.481168 |
| C | -2.877398 | -0.163341 | -0.779512 |
| O | -3.304531 | 0.241697  | -1.832103 |
| C | -3.738191 | -0.609229 | 0.380214  |
| C | -3.161793 | -1.733517 | 1.246856  |
| C | -4.135500 | -2.059106 | 2.379416  |
| C | -2.860022 | -2.978790 | 0.413380  |
| H | 3.449237  | -2.566485 | 0.843536  |
| H | 4.678475  | -2.414015 | -0.410006 |
| H | 4.789083  | 0.004682  | -0.122612 |
| H | 4.930771  | -0.711760 | 1.482196  |

|   |           |           |           |
|---|-----------|-----------|-----------|
| H | 3.145485  | -1.181343 | -1.860071 |
| H | 0.206049  | 0.839080  | 1.043858  |
| H | 0.711005  | 1.828726  | -1.785735 |
| H | -1.162983 | 0.353645  | -2.409865 |
| H | 1.044316  | -0.524991 | -2.561152 |
| H | 0.053370  | -1.801417 | -1.878686 |
| H | 2.249733  | -3.628457 | -0.842708 |
| H | 3.682072  | 0.579839  | 3.063196  |
| H | 2.074592  | 1.372006  | 2.598160  |
| H | -2.634758 | 2.601596  | -1.642739 |
| H | -2.378047 | 4.072059  | -0.516978 |
| H | -0.103068 | -1.305936 | 0.961603  |
| H | 1.493366  | -1.786493 | 1.545709  |
| H | 0.627840  | -2.771305 | 0.340492  |
| H | -3.911793 | 0.284328  | 0.995225  |
| H | -4.706366 | -0.896456 | -0.042875 |
| H | -2.224583 | -1.372923 | 1.687779  |
| H | -4.344396 | -1.178131 | 2.994795  |
| H | -5.087903 | -2.422274 | 1.975840  |
| H | -3.729257 | -2.839056 | 3.030464  |
| H | -2.451680 | -3.776741 | 1.041662  |
| H | -2.131733 | -2.766034 | -0.375927 |
| H | -3.775278 | -3.357138 | -0.057321 |

M062X energy = -1154.62434916 a.u.

(1R,5S,6R,7R,8R,10R)-3, Conf. J

|   |           |           |           |
|---|-----------|-----------|-----------|
| C | 3.532308  | -2.455506 | -0.077364 |
| C | 4.250781  | -1.147090 | 0.284489  |
| C | 3.288189  | -0.099023 | 0.789811  |
| C | 2.139754  | 0.137708  | -0.162366 |
| C | 1.328100  | -1.188193 | -0.375273 |
| C | 2.318215  | -2.218634 | -0.975351 |
| C | 1.153337  | 1.228222  | 0.195218  |
| C | 0.165164  | 1.454067  | -0.951485 |
| C | -0.721209 | 0.240982  | -1.162313 |
| C | 0.179220  | -0.981257 | -1.391237 |
| O | 1.726826  | 2.527721  | 0.413200  |
| C | 0.779870  | 3.474187  | 0.133297  |
| C | -0.357474 | 2.811296  | -0.594044 |
| O | 1.679492  | -3.437029 | -1.310045 |
| C | 3.441938  | 0.527946  | 1.954074  |
| C | -1.521009 | 3.414930  | -0.807266 |
| O | 0.904625  | 4.626459  | 0.433096  |
| H | 2.578753  | 0.403616  | -1.139863 |
| C | 0.764751  | -1.725816 | 0.951161  |
| O | -1.537675 | 0.035587  | 0.002982  |
| C | -2.857254 | 0.310679  | -0.089282 |
| O | -3.386187 | 0.734982  | -1.088307 |
| C | -3.578695 | -0.034586 | 1.189182  |
| C | -4.126841 | -1.479224 | 1.162682  |
| C | -5.150973 | -1.672533 | 0.044352  |
| C | -3.002647 | -2.511557 | 1.066726  |
| H | 3.205184  | -2.960130 | 0.842030  |
| H | 4.214589  | -3.140750 | -0.590642 |
| H | 4.741863  | -0.760357 | -0.620468 |
| H | 5.038508  | -1.332925 | 1.020485  |

|   |           |           |           |
|---|-----------|-----------|-----------|
| H | 2.667868  | -1.813074 | -1.935512 |
| H | 0.606272  | 0.958113  | 1.107760  |
| H | 0.769522  | 1.564339  | -1.866251 |
| H | -1.385611 | 0.383017  | -2.018006 |
| H | 0.616273  | -0.860281 | -2.392373 |
| H | -0.431679 | -1.888445 | -1.431771 |
| H | 1.580329  | -3.952077 | -0.496233 |
| H | 4.284763  | 0.298998  | 2.600695  |
| H | 2.763798  | 1.306869  | 2.286757  |
| H | -2.339159 | 2.923273  | -1.324777 |
| H | -1.664883 | 4.429398  | -0.445761 |
| H | 1.537044  | -1.806978 | 1.720247  |
| H | 0.321899  | -2.715515 | 0.786960  |
| H | -0.034147 | -1.093643 | 1.341166  |
| H | -2.894404 | 0.088675  | 2.033439  |
| H | -4.408096 | 0.670120  | 1.292535  |
| H | -4.636601 | -1.619551 | 2.124272  |
| H | -5.584354 | -2.676191 | 0.093206  |
| H | -5.963954 | -0.943708 | 0.118186  |
| H | -4.686576 | -1.549781 | -0.939250 |
| H | -2.480631 | -2.438464 | 0.105671  |
| H | -3.406664 | -3.525056 | 1.151170  |
| H | -2.259700 | -2.370834 | 1.858850  |

M062X energy = -1154.62413421 a.u.

(1R,5S,6R,7R,8R,10R)-3, Conf. K

|   |           |           |           |
|---|-----------|-----------|-----------|
| C | 2.461539  | -3.304479 | 0.074692  |
| C | 3.550537  | -2.348917 | 0.583986  |
| C | 2.969034  | -1.026997 | 1.026223  |
| C | 2.108886  | -0.385600 | -0.037431 |
| C | 0.919290  | -1.334499 | -0.425455 |
| C | 1.559856  | -2.632184 | -0.960474 |
| C | 1.521870  | 0.973892  | 0.272234  |
| C | 0.832787  | 1.552010  | -0.966501 |
| C | -0.379591 | 0.738126  | -1.360565 |
| C | 0.057275  | -0.723376 | -1.557723 |
| O | 2.476761  | 1.988191  | 0.631622  |
| C | 1.963154  | 3.210352  | 0.299901  |
| C | 0.766388  | 2.997693  | -0.585826 |
| O | 0.509991  | -3.489367 | -1.370367 |
| C | 3.190709  | -0.505180 | 2.230756  |
| C | -0.099442 | 3.962058  | -0.868730 |
| O | 2.440936  | 4.242132  | 0.674788  |
| H | 2.737067  | -0.271697 | -0.937997 |
| C | 0.033963  | -1.666992 | 0.789885  |
| O | -1.346705 | 0.886161  | -0.308166 |
| C | -2.612017 | 0.525617  | -0.603664 |
| O | -2.954143 | 0.146467  | -1.696799 |
| C | -3.526405 | 0.667351  | 0.590873  |
| C | -4.611150 | -0.413231 | 0.607884  |
| C | -3.985113 | -1.800919 | 0.751327  |
| C | -5.607176 | -0.141760 | 1.733656  |
| H | 1.840578  | -3.656769 | 0.905214  |
| H | 2.926374  | -4.191540 | -0.375523 |
| H | 4.260305  | -2.159959 | -0.235042 |
| H | 4.117264  | -2.810716 | 1.397722  |

|   |           |           |           |
|---|-----------|-----------|-----------|
| H | 2.177340  | -2.353757 | -1.834313 |
| H | 0.802228  | 0.896385  | 1.097262  |
| H | 1.555408  | 1.460988  | -1.793120 |
| H | -0.830681 | 1.105783  | -2.287548 |
| H | 0.634348  | -0.749412 | -2.493075 |
| H | -0.823632 | -1.349409 | -1.723537 |
| H | 0.900976  | -4.321316 | -1.671640 |
| H | 3.808751  | -1.027164 | 2.956311  |
| H | 2.797721  | 0.462420  | 2.524705  |
| H | -0.970140 | 3.789188  | -1.494207 |
| H | 0.055047  | 4.958325  | -0.464839 |
| H | -0.592393 | -0.820436 | 1.077451  |
| H | 0.631344  | -1.948784 | 1.660796  |
| H | -0.623565 | -2.502482 | 0.532167  |
| H | -2.928170 | 0.640786  | 1.508367  |
| H | -3.981432 | 1.664994  | 0.534169  |
| H | -5.133102 | -0.366352 | -0.355035 |
| H | -3.421238 | -1.873778 | 1.689787  |
| H | -4.756178 | -2.577332 | 0.762179  |
| H | -3.302961 | -2.017735 | -0.077107 |
| H | -6.078279 | 0.840618  | 1.625323  |
| H | -5.105744 | -0.169700 | 2.708398  |
| H | -6.398316 | -0.897614 | 1.744222  |

M062X energy = -1154.62408929 a.u.

(1R,5S,6R,7R,8R,10R)-3, Conf. L

|   |           |           |           |
|---|-----------|-----------|-----------|
| C | 2.462423  | -3.308519 | 0.079102  |
| C | 3.540525  | -2.350092 | 0.604586  |
| C | 2.959545  | -1.025664 | 1.040112  |
| C | 2.108765  | -0.383441 | -0.030701 |
| C | 0.924826  | -1.335679 | -0.423224 |
| C | 1.573547  | -2.637808 | -0.960729 |
| C | 1.519391  | 0.976176  | 0.273968  |
| C | 0.836498  | 1.553171  | -0.969203 |
| C | -0.375491 | 0.740669  | -1.365669 |
| C | 0.064492  | -0.722364 | -1.554988 |
| O | 2.470845  | 1.992099  | 0.636820  |
| C | 1.958943  | 3.213537  | 0.300869  |
| C | 0.767560  | 2.999638  | -0.592088 |
| O | 0.609774  | -3.595770 | -1.356129 |
| C | 3.172861  | -0.500142 | 2.244596  |
| C | -0.095768 | 3.963832  | -0.882856 |
| O | 2.433202  | 4.246302  | 0.676864  |
| H | 2.744187  | -0.270825 | -0.926765 |
| C | 0.034000  | -1.676109 | 0.784192  |
| O | -1.346823 | 0.891679  | -0.319526 |
| C | -2.604942 | 0.501622  | -0.610133 |
| O | -2.931405 | 0.080071  | -1.693023 |
| C | -3.528938 | 0.669611  | 0.572741  |
| C | -4.611552 | -0.412473 | 0.610269  |
| C | -3.984465 | -1.794210 | 0.799037  |
| C | -5.617878 | -0.111151 | 1.719228  |
| H | 1.831575  | -3.665635 | 0.900174  |
| H | 2.920658  | -4.191743 | -0.376366 |
| H | 4.263007  | -2.161729 | -0.203546 |
| H | 4.095574  | -2.811974 | 1.426315  |

|   |           |           |           |
|---|-----------|-----------|-----------|
| H | 2.201074  | -2.357251 | -1.826503 |
| H | 0.795089  | 0.898057  | 1.095123  |
| H | 1.562460  | 1.460040  | -1.792698 |
| H | -0.822340 | 1.103924  | -2.296635 |
| H | 0.639755  | -0.745671 | -2.493346 |
| H | -0.832038 | -1.331867 | -1.712216 |
| H | 0.163318  | -3.272398 | -2.151023 |
| H | 3.783470  | -1.022037 | 2.976410  |
| H | 2.780662  | 0.469457  | 2.533117  |
| H | -0.962614 | 3.790973  | -1.513667 |
| H | 0.056993  | 4.960694  | -0.479811 |
| H | -0.619598 | -0.845075 | 1.057211  |
| H | 0.629074  | -1.933860 | 1.663714  |
| H | -0.594377 | -2.535173 | 0.528221  |
| H | -2.936839 | 0.668960  | 1.494609  |
| H | -3.985008 | 1.664801  | 0.487198  |
| H | -5.125425 | -0.394008 | -0.357966 |
| H | -3.429895 | -1.840145 | 1.744575  |
| H | -4.753857 | -2.571834 | 0.823382  |
| H | -3.293234 | -2.032555 | -0.015853 |
| H | -6.090104 | 0.866535  | 1.578539  |
| H | -5.125000 | -0.110069 | 2.698658  |
| H | -6.407376 | -0.868268 | 1.744446  |

M062X energy = -1154.62404411 a.u.

(1R,5S,6R,7R,8R,10R)-3, Conf. M

|   |           |           |           |
|---|-----------|-----------|-----------|
| C | 3.538416  | -2.593436 | 0.175987  |
| C | 4.305115  | -1.317300 | 0.552368  |
| C | 3.368551  | -0.206327 | 0.964131  |
| C | 2.298637  | 0.064839  | -0.067809 |
| C | 1.441244  | -1.226549 | -0.319637 |
| C | 2.421125  | -2.305237 | -0.826417 |
| C | 1.337398  | 1.198905  | 0.213152  |
| C | 0.438142  | 1.448916  | -0.999602 |
| C | -0.479142 | 0.277146  | -1.269566 |
| C | 0.377263  | -0.990643 | -1.420187 |
| O | 1.948674  | 2.479925  | 0.448605  |
| C | 1.061702  | 3.458453  | 0.096548  |
| C | -0.056444 | 2.825771  | -0.685635 |
| O | 1.665345  | -3.468358 | -1.111124 |
| C | 3.480675  | 0.443738  | 2.120484  |
| C | -1.196843 | 3.451156  | -0.946915 |
| O | 1.213918  | 4.610699  | 0.383668  |
| H | 2.813180  | 0.300537  | -1.015591 |
| C | 0.762449  | -1.718416 | 0.971606  |
| O | -1.398203 | 0.194030  | -0.168485 |
| C | -2.530622 | -0.508319 | -0.384346 |
| O | -2.807498 | -1.006721 | -1.447234 |
| C | -3.359281 | -0.596160 | 0.875384  |
| C | -4.788577 | -1.075737 | 0.623662  |
| C | -5.481721 | -1.374498 | 1.952348  |
| C | -5.577246 | -0.043318 | -0.182360 |
| H | 3.100387  | -3.055282 | 1.067205  |
| H | 4.229625  | -3.328095 | -0.257729 |
| H | 4.877895  | -0.982256 | -0.325088 |
| H | 5.028643  | -1.523686 | 1.346416  |

|   |           |           |           |
|---|-----------|-----------|-----------|
| H | 2.876911  | -1.918827 | -1.756666 |
| H | 0.722835  | 0.965319  | 1.091859  |
| H | 1.109273  | 1.529342  | -1.869699 |
| H | -1.063269 | 0.425390  | -2.183016 |
| H | 0.887074  | -0.906502 | -2.390509 |
| H | -0.274785 | -1.865529 | -1.491101 |
| H | 2.276426  | -4.161530 | -1.397236 |
| H | 4.266126  | 0.188203  | 2.826628  |
| H | 2.824617  | 1.264658  | 2.390181  |
| H | -2.003278 | 2.973147  | -1.495148 |
| H | -1.341362 | 4.471370  | -0.603676 |
| H | -0.065298 | -1.069473 | 1.262819  |
| H | 1.464506  | -1.756259 | 1.808393  |
| H | 0.365067  | -2.723433 | 0.803007  |
| H | -2.829131 | -1.283822 | 1.549237  |
| H | -3.348038 | 0.383016  | 1.369484  |
| H | -4.727348 | -1.998802 | 0.035007  |
| H | -4.944134 | -2.137940 | 2.524207  |
| H | -5.540330 | -0.470101 | 2.569695  |
| H | -6.502805 | -1.731398 | 1.787119  |
| H | -6.596118 | -0.395180 | -0.371089 |
| H | -5.102380 | 0.150872  | -1.147658 |
| H | -5.647232 | 0.901757  | 0.370338  |

M062X energy = -1154.62393801 a.u.

(1R,5S,6R,7R,8R,10R)-3, Conf. N

|   |           |           |           |
|---|-----------|-----------|-----------|
| C | 3.505322  | -2.630056 | 0.174036  |
| C | 4.280380  | -1.362371 | 0.560194  |
| C | 3.360025  | -0.236271 | 0.967735  |
| C | 2.296236  | 0.049676  | -0.066687 |
| C | 1.427169  | -1.232964 | -0.315800 |
| C | 2.399032  | -2.327464 | -0.828582 |
| C | 1.348337  | 1.195236  | 0.212979  |
| C | 0.451896  | 1.455287  | -1.000246 |
| C | -0.481828 | 0.296178  | -1.265842 |
| C | 0.360843  | -0.983204 | -1.410452 |
| O | 1.973480  | 2.469468  | 0.447092  |
| C | 1.099015  | 3.458272  | 0.093531  |
| C | -0.026020 | 2.838776  | -0.689630 |
| O | 1.738937  | -3.551075 | -1.093644 |
| C | 3.477849  | 0.415555  | 2.122591  |
| C | -1.157244 | 3.478947  | -0.954651 |
| O | 1.263886  | 4.608889  | 0.379356  |
| H | 2.815877  | 0.278456  | -1.013776 |
| C | 0.746435  | -1.722881 | 0.973559  |
| O | -1.402164 | 0.228400  | -0.166551 |
| C | -2.522776 | -0.497513 | -0.368076 |
| O | -2.776743 | -1.040250 | -1.415447 |
| C | -3.365457 | -0.550750 | 0.883493  |
| C | -4.785852 | -1.056927 | 0.632532  |
| C | -5.490705 | -1.316041 | 1.963403  |
| C | -5.577294 | -0.063998 | -0.219126 |
| H | 3.057477  | -3.092345 | 1.060252  |
| H | 4.176844  | -3.373281 | -0.266582 |
| H | 4.865601  | -1.032799 | -0.311254 |
| H | 4.994877  | -1.579311 | 1.359615  |



|   |           |           |           |
|---|-----------|-----------|-----------|
| H | 2.864326  | -1.943386 | -1.754883 |
| H | 0.730948  | 0.968250  | 1.091714  |
| H | 1.123313  | 1.524682  | -1.871116 |
| H | -1.063113 | 0.446863  | -2.180961 |
| H | 0.863162  | -0.906792 | -2.387031 |
| H | -0.322895 | -1.837426 | -1.466492 |
| H | 1.173975  | -3.433357 | -1.869962 |
| H | 4.257005  | 0.149471  | 2.831740  |
| H | 2.833868  | 1.247190  | 2.388702  |
| H | -1.969306 | 3.011723  | -1.503810 |
| H | -1.288235 | 4.501587  | -0.613228 |
| H | -0.094254 | -1.086346 | 1.256115  |
| H | 1.444381  | -1.743707 | 1.813992  |
| H | 0.370893  | -2.737894 | 0.810719  |
| H | -2.835233 | -1.207413 | 1.587616  |
| H | -3.371555 | 0.445326  | 1.342507  |
| H | -4.706733 | -2.000046 | 0.078766  |
| H | -5.567400 | -0.390735 | 2.546767  |
| H | -6.505363 | -1.691194 | 1.799462  |
| H | -4.950906 | -2.051701 | 2.568521  |
| H | -5.094308 | 0.101535  | -1.185782 |
| H | -5.665007 | 0.899324  | 0.298301  |
| H | -6.589590 | -0.435049 | -0.406138 |

M062X energy = -1154.62384650 a.u.

(1R,5S,6R,7R,8R,10R)-3, Conf. O

|   |           |           |           |
|---|-----------|-----------|-----------|
| C | 2.478213  | -3.312240 | 0.065885  |
| C | 3.551135  | -2.351156 | 0.598822  |
| C | 2.956026  | -1.036876 | 1.044456  |
| C | 2.110578  | -0.392648 | -0.028529 |
| C | 0.922251  | -1.337326 | -0.426804 |
| C | 1.561377  | -2.645331 | -0.959952 |
| C | 1.533277  | 0.973556  | 0.270558  |
| C | 0.847676  | 1.550062  | -0.970796 |
| C | -0.366269 | 0.737131  | -1.363490 |
| C | 0.074248  | -0.721944 | -1.565460 |
| O | 2.494796  | 1.982637  | 0.625262  |
| C | 1.985959  | 3.206556  | 0.291100  |
| C | 0.787213  | 2.996918  | -0.593216 |
| O | 0.590523  | -3.552189 | -1.447430 |
| C | 3.153628  | -0.522756 | 2.256433  |
| C | -0.074728 | 3.964313  | -0.877612 |
| O | 2.468070  | 4.237076  | 0.663376  |
| H | 2.747229  | -0.287639 | -0.924373 |
| C | 0.025071  | -1.658713 | 0.781384  |
| O | -1.328594 | 0.878715  | -0.304953 |
| C | -2.592466 | 0.505593  | -0.590604 |
| O | -2.938246 | 0.117208  | -1.679217 |
| C | -3.499136 | 0.652242  | 0.609495  |
| C | -4.645648 | -0.361193 | 0.592792  |
| C | -4.104450 | -1.787846 | 0.693626  |
| C | -5.625465 | -0.065912 | 1.726930  |
| H | 1.870543  | -3.683395 | 0.902434  |
| H | 2.941946  | -4.186651 | -0.401897 |
| H | 4.268680  | -2.150717 | -0.210244 |
| H | 4.111852  | -2.816287 | 1.414914  |

|   |           |           |           |
|---|-----------|-----------|-----------|
| H | 2.161074  | -2.377218 | -1.841407 |
| H | 0.812665  | 0.908743  | 1.095543  |
| H | 1.570765  | 1.454336  | -1.796408 |
| H | -0.822222 | 1.107522  | -2.287012 |
| H | 0.664443  | -0.740842 | -2.492527 |
| H | -0.801728 | -1.349271 | -1.750981 |
| H | 0.197059  | -4.003140 | -0.686342 |
| H | 3.761745  | -1.046216 | 2.989233  |
| H | 2.751901  | 0.441637  | 2.549680  |
| H | -0.946303 | 3.794010  | -1.502573 |
| H | 0.084258  | 4.960796  | -0.476012 |
| H | -0.524336 | -0.781975 | 1.128654  |
| H | 0.599531  | -2.044641 | 1.627332  |
| H | -0.725062 | -2.404968 | 0.493540  |
| H | -2.901874 | 0.558160  | 1.523639  |
| H | -3.891687 | 1.677710  | 0.593816  |
| H | -5.162734 | -0.255053 | -0.367969 |
| H | -3.438770 | -2.018459 | -0.144165 |
| H | -3.546046 | -1.921301 | 1.628903  |
| H | -4.920882 | -2.516366 | 0.683880  |
| H | -6.036306 | 0.945963  | 1.649717  |
| H | -5.128272 | -0.154381 | 2.700264  |
| H | -6.460804 | -0.772512 | 1.713964  |

M062X energy = -1154.62377681 a.u.

(1R,5S,6R,7R,8R,10R)-3, Conf. P

|   |           |           |           |
|---|-----------|-----------|-----------|
| C | 4.243543  | -1.415938 | 0.411627  |
| C | 4.486736  | 0.084832  | 0.623608  |
| C | 3.206540  | 0.830226  | 0.918251  |
| C | 2.133167  | 0.576266  | -0.114691 |
| C | 1.806858  | -0.957112 | -0.188936 |
| C | 3.125765  | -1.665756 | -0.592746 |
| C | 0.821384  | 1.310495  | 0.054602  |
| C | -0.082318 | 1.078481  | -1.159040 |
| C | -0.510884 | -0.367412 | -1.269904 |
| C | 0.747530  | -1.252161 | -1.278956 |
| O | 0.918604  | 2.744138  | 0.129749  |
| C | -0.257991 | 3.284990  | -0.305837 |
| C | -1.053344 | 2.203796  | -0.985543 |
| O | 2.973040  | -3.068834 | -0.695640 |
| C | 3.051339  | 1.611818  | 1.984863  |
| C | -2.341058 | 2.332616  | -1.278914 |
| O | -0.544743 | 4.436965  | -0.152258 |
| H | 2.548763  | 0.867724  | -1.095310 |
| C | 1.328223  | -1.507632 | 1.165272  |
| O | -1.373777 | -0.635102 | -0.156854 |
| C | -2.173120 | -1.721248 | -0.259146 |
| O | -2.149916 | -2.468738 | -1.204960 |
| C | -3.100814 | -1.807432 | 0.925046  |
| C | -4.064607 | -0.607453 | 0.965074  |
| C | -4.906376 | -0.547724 | -0.309782 |
| C | -4.954679 | -0.692349 | 2.203171  |
| H | 3.978322  | -1.900122 | 1.357643  |
| H | 5.151427  | -1.906317 | 0.047320  |
| H | 4.925711  | 0.500196  | -0.295798 |
| H | 5.214417  | 0.245529  | 1.424428  |

|   |           |           |           |
|---|-----------|-----------|-----------|
| H | 3.435190  | -1.248973 | -1.568840 |
| H | 0.314883  | 0.970109  | 0.967079  |
| H | 0.529916  | 1.299428  | -2.047928 |
| H | -1.081617 | -0.550908 | -2.186270 |
| H | 1.207346  | -1.113427 | -2.269614 |
| H | 0.427200  | -2.297846 | -1.215486 |
| H | 2.413645  | -3.262003 | -1.460848 |
| H | 3.859507  | 1.739603  | 2.699925  |
| H | 2.139823  | 2.171075  | 2.167861  |
| H | -2.907400 | 1.535279  | -1.751436 |
| H | -2.855941 | 3.259543  | -1.043452 |
| H | 1.377697  | -2.600504 | 1.139314  |
| H | 0.298130  | -1.217160 | 1.380584  |
| H | 1.953732  | -1.152519 | 1.987942  |
| H | -3.656516 | -2.746033 | 0.842502  |
| H | -2.500663 | -1.832510 | 1.842052  |
| H | -3.454926 | 0.302884  | 1.026275  |
| H | -4.283239 | -0.494938 | -1.209575 |
| H | -5.533453 | -1.442529 | -0.398376 |
| H | -5.563781 | 0.327110  | -0.301322 |
| H | -4.360690 | -0.711201 | 3.122311  |
| H | -5.566009 | -1.601895 | 2.175822  |
| H | -5.632482 | 0.165147  | 2.254788  |

M062X energy = -1154.62371826 a.u.

(1R,5S,6R,7R,8R,10R)-3, Conf. Q

|   |           |           |           |
|---|-----------|-----------|-----------|
| C | 4.250696  | -1.393380 | 0.419588  |
| C | 4.490511  | 0.109698  | 0.622143  |
| C | 3.203626  | 0.843236  | 0.917402  |
| C | 2.132668  | 0.579379  | -0.115413 |
| C | 1.812572  | -0.956304 | -0.192164 |
| C | 3.130627  | -1.653935 | -0.587214 |
| C | 0.815994  | 1.305357  | 0.051433  |
| C | -0.083078 | 1.067282  | -1.163983 |
| C | -0.499611 | -0.382500 | -1.278144 |
| C | 0.762647  | -1.259270 | -1.289625 |
| O | 0.905328  | 2.739708  | 0.127410  |
| C | -0.274086 | 3.273016  | -0.310627 |
| C | -1.061132 | 2.186674  | -0.991448 |
| O | 2.859198  | -3.037524 | -0.716488 |
| C | 3.043787  | 1.622646  | 1.984854  |
| C | -2.349221 | 2.307146  | -1.286979 |
| O | -0.567452 | 4.423562  | -0.157300 |
| H | 2.546396  | 0.872754  | -1.095870 |
| C | 1.329063  | -1.504347 | 1.162807  |
| O | -1.361712 | -0.657436 | -0.164422 |
| C | -2.188620 | -1.720270 | -0.285860 |
| O | -2.202913 | -2.439416 | -1.252955 |
| C | -3.100402 | -1.816820 | 0.910604  |
| C | -4.053213 | -0.609357 | 0.979818  |
| C | -4.922418 | -0.533840 | -0.275678 |
| C | -4.917088 | -0.694833 | 2.236324  |
| H | 3.987888  | -1.871830 | 1.369062  |
| H | 5.172458  | -1.872652 | 0.064346  |
| H | 4.922389  | 0.522264  | -0.301739 |
| H | 5.220256  | 0.278889  | 1.419300  |

|   |           |           |           |
|---|-----------|-----------|-----------|
| H | 3.436742  | -1.240150 | -1.565789 |
| H | 0.309173  | 0.962917  | 0.962708  |
| H | 0.529604  | 1.293647  | -2.051155 |
| H | -1.069709 | -0.566809 | -2.194438 |
| H | 1.230514  | -1.113461 | -2.273776 |
| H | 0.474182  | -2.312627 | -1.239107 |
| H | 3.687349  | -3.487518 | -0.934228 |
| H | 3.851726  | 1.757675  | 2.698915  |
| H | 2.127349  | 2.173391  | 2.168863  |
| H | -2.908631 | 1.505754  | -1.760876 |
| H | -2.871144 | 3.230375  | -1.052427 |
| H | 0.307263  | -1.189540 | 1.381811  |
| H | 1.964823  | -1.167403 | 1.985634  |
| H | 1.347753  | -2.597340 | 1.130665  |
| H | -3.666151 | -2.748919 | 0.822423  |
| H | -2.488509 | -1.859446 | 1.819013  |
| H | -3.434598 | 0.295496  | 1.033852  |
| H | -5.567678 | 0.349712  | -0.249716 |
| H | -4.319125 | -0.487626 | -1.188969 |
| H | -5.563322 | -1.419954 | -0.352298 |
| H | -5.588025 | 0.166766  | 2.307167  |
| H | -4.303607 | -0.722739 | 3.142377  |
| H | -5.534897 | -1.600253 | 2.217263  |

M062X energy = -1154.62370475 a.u.

(1R,5S,6R,7R,8R,10R)-3, Conf. R

|   |           |           |           |
|---|-----------|-----------|-----------|
| C | 3.544793  | -2.466938 | -0.034404 |
| C | 4.270000  | -1.155574 | 0.299921  |
| C | 3.318324  | -0.086969 | 0.783546  |
| C | 2.161502  | 0.134436  | -0.163295 |
| C | 1.354841  | -1.198754 | -0.347603 |
| C | 2.347580  | -2.228766 | -0.945654 |
| C | 1.170936  | 1.221759  | 0.191629  |
| C | 0.176760  | 1.432411  | -0.953165 |
| C | -0.711195 | 0.217857  | -1.141528 |
| C | 0.187958  | -1.011505 | -1.348940 |
| O | 1.736997  | 2.527079  | 0.394861  |
| C | 0.786314  | 3.466536  | 0.107401  |
| C | -0.349702 | 2.792042  | -0.611199 |
| O | 1.743926  | -3.489623 | -1.171524 |
| C | 3.487206  | 0.570663  | 1.928724  |
| C | -1.514902 | 3.390019  | -0.830907 |
| O | 0.906326  | 4.622565  | 0.394273  |
| H | 2.591800  | 0.392597  | -1.146953 |
| C | 0.812382  | -1.731814 | 0.989278  |
| O | -1.524757 | 0.030700  | 0.025897  |
| C | -2.846620 | 0.296811  | -0.070790 |
| O | -3.376134 | 0.702150  | -1.077479 |
| C | -3.563467 | -0.037654 | 1.212413  |
| C | -4.182318 | -1.452916 | 1.157633  |
| C | -5.300511 | -1.540086 | 0.119084  |
| C | -3.117986 | -2.523661 | 0.912857  |
| H | 3.195718  | -2.957807 | 0.880359  |
| H | 4.223541  | -3.166831 | -0.531356 |
| H | 4.766298  | -0.790046 | -0.611494 |
| H | 5.055239  | -1.330876 | 1.041081  |

|   |           |           |           |
|---|-----------|-----------|-----------|
| H | 2.715130  | -1.813101 | -1.901705 |
| H | 0.630748  | 0.953038  | 1.109040  |
| H | 0.776006  | 1.531691  | -1.872638 |
| H | -1.376230 | 0.344717  | -1.999349 |
| H | 0.602310  | -0.917738 | -2.364532 |
| H | -0.445413 | -1.906909 | -1.336902 |
| H | 1.132531  | -3.407259 | -1.916294 |
| H | 4.334315  | 0.351746  | 2.573184  |
| H | 2.817469  | 1.362164  | 2.248098  |
| H | -2.332448 | 2.891024  | -1.342313 |
| H | -1.660915 | 4.408115  | -0.480651 |
| H | -0.056380 | -1.165580 | 1.328908  |
| H | 1.570910  | -1.692662 | 1.774781  |
| H | 0.505359  | -2.773998 | 0.854443  |
| H | -2.857594 | 0.029024  | 2.044659  |
| H | -4.354348 | 0.704744  | 1.350653  |
| H | -4.618734 | -1.624796 | 2.149553  |
| H | -5.761775 | -2.532386 | 0.137777  |
| H | -6.080540 | -0.796875 | 0.311214  |
| H | -4.913726 | -1.361323 | -0.888938 |
| H | -2.293885 | -2.447698 | 1.629534  |
| H | -2.693044 | -2.429852 | -0.093770 |
| H | -3.554585 | -3.523473 | 0.995371  |

M062X energy = -1154.62359280 a.u.

(1R,5S,6R,7R,8R,10R)-3, Conf. S

|   |           |           |           |
|---|-----------|-----------|-----------|
| C | 3.134223  | -2.688522 | 0.095036  |
| C | 3.934926  | -1.490842 | 0.626228  |
| C | 3.027109  | -0.359640 | 1.047237  |
| C | 2.060819  | 0.048057  | -0.040557 |
| C | 1.162974  | -1.170184 | -0.461662 |
| C | 2.126019  | -2.262023 | -0.971354 |
| C | 1.134783  | 1.207899  | 0.253398  |
| C | 0.367093  | 1.602656  | -1.009263 |
| C | -0.583643 | 0.515052  | -1.456948 |
| C | 0.203694  | -0.795599 | -1.619256 |
| O | 1.782103  | 2.429755  | 0.650774  |
| C | 0.983726  | 3.482440  | 0.300328  |
| C | -0.082983 | 2.978678  | -0.632400 |
| O | 1.338778  | -3.354296 | -1.409947 |
| C | 3.078070  | 0.196702  | 2.255730  |
| C | -1.157121 | 3.689351  | -0.950562 |
| O | 1.165069  | 4.597947  | 0.695324  |
| H | 2.663481  | 0.326422  | -0.922488 |
| C | 0.356280  | -1.714142 | 0.730423  |
| O | -1.628123 | 0.422205  | -0.474292 |
| C | -2.820244 | -0.043979 | -0.913418 |
| O | -3.007793 | -0.412682 | -2.045528 |
| C | -3.843366 | -0.046150 | 0.194880  |
| C | -3.461615 | -1.002350 | 1.336627  |
| C | -4.535800 | -0.971579 | 2.422442  |
| C | -3.254649 | -2.421727 | 0.809002  |
| H | 2.594986  | -3.181979 | 0.910811  |
| H | 3.818153  | -3.433141 | -0.333179 |
| H | 4.594807  | -1.128282 | -0.175911 |
| H | 4.578582  | -1.795905 | 1.456411  |

|   |           |           |           |
|---|-----------|-----------|-----------|
| H | 2.680380  | -1.833988 | -1.826846 |
| H | 0.430517  | 0.937683  | 1.051084  |
| H | 1.120455  | 1.708283  | -1.806400 |
| H | -1.051181 | 0.765583  | -2.413569 |
| H | 0.791637  | -0.689729 | -2.542092 |
| H | -0.495318 | -1.618928 | -1.795385 |
| H | 1.935724  | -4.058016 | -1.700094 |
| H | 3.789447  | -0.154715 | 2.998273  |
| H | 2.445589  | 1.032167  | 2.536691  |
| H | -1.927239 | 3.303616  | -1.612251 |
| H | -1.281861 | 4.687932  | -0.542131 |
| H | -0.496568 | -1.072063 | 0.958766  |
| H | 0.967735  | -1.793841 | 1.633128  |
| H | -0.027087 | -2.707138 | 0.478190  |
| H | -3.939258 | 0.974486  | 0.582669  |
| H | -4.797696 | -0.344965 | -0.248664 |
| H | -2.519288 | -0.643774 | 1.769739  |
| H | -4.677134 | 0.039413  | 2.817626  |
| H | -5.496272 | -1.316291 | 2.022012  |
| H | -4.265710 | -1.627439 | 3.255710  |
| H | -2.951571 | -3.096627 | 1.615566  |
| H | -2.482983 | -2.460315 | 0.032478  |
| H | -4.184392 | -2.806463 | 0.373730  |

M062X energy = -1154.62356166 a.u.

(1R,5S,6R,7R,8R,10R)-3, Conf. T

|   |           |           |           |
|---|-----------|-----------|-----------|
| C | 3.536733  | -2.602175 | 0.149504  |
| C | 4.290589  | -1.328577 | 0.559443  |
| C | 3.345832  | -0.229114 | 0.981858  |
| C | 2.290169  | 0.057514  | -0.059793 |
| C | 1.429708  | -1.226536 | -0.331841 |
| C | 2.409988  | -2.313592 | -0.842629 |
| C | 1.337620  | 1.200326  | 0.215804  |
| C | 0.446175  | 1.460411  | -1.000520 |
| C | -0.476170 | 0.293835  | -1.277750 |
| C | 0.378474  | -0.973206 | -1.438998 |
| O | 1.959118  | 2.474753  | 0.457453  |
| C | 1.080327  | 3.461284  | 0.105786  |
| C | -0.039698 | 2.839686  | -0.683066 |
| O | 1.738242  | -3.501574 | -1.217259 |
| C | 3.438102  | 0.399181  | 2.151892  |
| C | -1.174141 | 3.474871  | -0.946572 |
| O | 1.239508  | 4.611100  | 0.398177  |
| H | 2.817310  | 0.292798  | -1.000867 |
| C | 0.733590  | -1.720498 | 0.948191  |
| O | -1.391404 | 0.204638  | -0.173151 |
| C | -2.521816 | -0.501902 | -0.385741 |
| O | -2.796772 | -1.006905 | -1.445902 |
| C | -3.350950 | -0.585448 | 0.874238  |
| C | -4.778317 | -1.072038 | 0.624632  |
| C | -5.470851 | -1.365971 | 1.954724  |
| C | -5.570532 | -0.047041 | -0.187376 |
| H | 3.114124  | -3.081349 | 1.043226  |
| H | 4.220956  | -3.325759 | -0.305180 |
| H | 4.869862  | -0.975460 | -0.306213 |
| H | 5.007895  | -1.546822 | 1.356057  |

|   |           |           |           |
|---|-----------|-----------|-----------|
| H | 2.854181  | -1.937207 | -1.775112 |
| H | 0.715166  | 0.973259  | 1.090504  |
| H | 1.121635  | 1.539500  | -1.867309 |
| H | -1.063020 | 0.450330  | -2.188093 |
| H | 0.899425  | -0.874784 | -2.401827 |
| H | -0.272679 | -1.846417 | -1.534698 |
| H | 1.545625  | -4.000641 | -0.410283 |
| H | 4.213702  | 0.133496  | 2.865109  |
| H | 2.776193  | 1.214074  | 2.426146  |
| H | -1.981844 | 3.005596  | -1.500421 |
| H | -1.312104 | 4.494866  | -0.600008 |
| H | -0.037356 | -1.026371 | 1.286799  |
| H | 1.438978  | -1.858468 | 1.771505  |
| H | 0.233048  | -2.675183 | 0.747580  |
| H | -2.818999 | -1.266589 | 1.553428  |
| H | -3.344010 | 0.396856  | 1.362149  |
| H | -4.713517 | -1.998085 | 0.041020  |
| H | -4.930936 | -2.124354 | 2.531190  |
| H | -5.533094 | -0.458428 | 2.567032  |
| H | -6.490508 | -1.727474 | 1.790978  |
| H | -6.587911 | -0.403936 | -0.374428 |
| H | -5.096274 | 0.143633  | -1.153649 |
| H | -5.644361 | 0.900753  | 0.360091  |

M062X energy = -1154.62355728 a.u.

(1R,5S,6R,7R,8R,10R)-3, Conf. U

|   |           |           |           |
|---|-----------|-----------|-----------|
| C | 3.094320  | -2.728875 | 0.109833  |
| C | 3.898393  | -1.541525 | 0.657685  |
| C | 3.005434  | -0.394452 | 1.067564  |
| C | 2.057664  | 0.028308  | -0.030883 |
| C | 1.150117  | -1.179437 | -0.456472 |
| C | 2.107555  | -2.288512 | -0.963773 |
| C | 1.145488  | 1.201521  | 0.253032  |
| C | 0.392799  | 1.605278  | -1.016384 |
| C | -0.571668 | 0.531813  | -1.467134 |
| C | 0.200198  | -0.791216 | -1.616687 |
| O | 1.806174  | 2.415158  | 0.652546  |
| C | 1.026651  | 3.478637  | 0.293668  |
| C | -0.040011 | 2.988916  | -0.646845 |
| O | 1.412566  | -3.447622 | -1.383818 |
| C | 3.051033  | 0.164264  | 2.275220  |
| C | -1.099959 | 3.715803  | -0.975456 |
| O | 1.220314  | 4.592357  | 0.687286  |
| H | 2.674078  | 0.296772  | -0.906784 |
| C | 0.329141  | -1.718381 | 0.726243  |
| O | -1.625006 | 0.458786  | -0.494528 |
| C | -2.796300 | -0.063971 | -0.926943 |
| O | -2.946763 | -0.506992 | -2.038385 |
| C | -3.841785 | -0.027327 | 0.158605  |
| C | -3.481540 | -0.943992 | 1.339983  |
| C | -4.565882 | -0.859246 | 2.412758  |
| C | -3.287357 | -2.385118 | 0.869532  |
| H | 2.538381  | -3.221145 | 0.915145  |
| H | 3.761882  | -3.481016 | -0.321562 |
| H | 4.578021  | -1.186950 | -0.131569 |
| H | 4.523540  | -1.857379 | 1.497951  |

|   |           |           |           |
|---|-----------|-----------|-----------|
| H | 2.679004  | -1.865950 | -1.810505 |
| H | 0.431292  | 0.941812  | 1.045617  |
| H | 1.153132  | 1.697065  | -1.808651 |
| H | -1.027242 | 0.783440  | -2.429653 |
| H | 0.789435  | -0.693239 | -2.541544 |
| H | -0.529486 | -1.592067 | -1.784787 |
| H | 0.927855  | -3.238078 | -2.194363 |
| H | 3.747253  | -0.197929 | 3.026819  |
| H | 2.429916  | 1.011126  | 2.547454  |
| H | -1.871435 | 3.341529  | -1.641989 |
| H | -1.211513 | 4.717135  | -0.569978 |
| H | -0.530272 | -1.080441 | 0.942781  |
| H | 0.929875  | -1.792831 | 1.636169  |
| H | -0.042588 | -2.716472 | 0.473527  |
| H | -3.944756 | 1.005647  | 0.509483  |
| H | -4.787012 | -0.343367 | -0.292346 |
| H | -2.539374 | -0.579393 | 1.768786  |
| H | -4.313056 | -1.488400 | 3.271542  |
| H | -4.696526 | 0.167107  | 2.769983  |
| H | -5.527067 | -1.205041 | 2.015045  |
| H | -2.994405 | -3.030678 | 1.703208  |
| H | -2.513476 | -2.462836 | 0.098308  |
| H | -4.219478 | -2.776844 | 0.445839  |

M062X energy = -1154.62350181 a.u.

(1R,5S,6R,7R,8R,10R)-3, Conf. V

|   |           |           |           |
|---|-----------|-----------|-----------|
| C | 4.260754  | -1.382617 | 0.391942  |
| C | 4.480358  | 0.118492  | 0.630287  |
| C | 3.185906  | 0.832472  | 0.938345  |
| C | 2.124137  | 0.582074  | -0.106521 |
| C | 1.807153  | -0.952158 | -0.204892 |
| C | 3.132473  | -1.650060 | -0.604334 |
| C | 0.808659  | 1.311830  | 0.054058  |
| C | -0.086548 | 1.080420  | -1.165461 |
| C | -0.501760 | -0.369476 | -1.286798 |
| C | 0.763792  | -1.240206 | -1.310741 |
| O | 0.902135  | 2.745170  | 0.136073  |
| C | -0.276098 | 3.282337  | -0.301641 |
| C | -1.063684 | 2.200087  | -0.988953 |
| O | 2.958711  | -3.037114 | -0.824107 |
| C | 3.011054  | 1.584324  | 2.023019  |
| C | -2.351189 | 2.323581  | -1.285759 |
| O | -0.568324 | 4.432310  | -0.143170 |
| H | 2.548154  | 0.883058  | -1.080372 |
| C | 1.312403  | -1.513182 | 1.139437  |
| O | -1.355052 | -0.652493 | -0.167637 |
| C | -2.170489 | -1.724942 | -0.282177 |
| O | -2.175515 | -2.451460 | -1.243735 |
| C | -3.082834 | -1.822633 | 0.913848  |
| C | -4.044473 | -0.621747 | 0.976558  |
| C | -4.906264 | -0.552880 | -0.284390 |
| C | -4.915285 | -0.712846 | 2.227859  |
| H | 4.022168  | -1.874030 | 1.345100  |
| H | 5.174927  | -1.850842 | 0.013180  |
| H | 4.909178  | 0.554961  | -0.283631 |
| H | 5.207634  | 0.277810  | 1.431822  |

|   |           |           |           |
|---|-----------|-----------|-----------|
| H | 3.428855  | -1.246896 | -1.583202 |
| H | 0.294734  | 0.969789  | 0.961282  |
| H | 0.528563  | 1.310906  | -2.049821 |
| H | -1.077815 | -0.549967 | -2.200198 |
| H | 1.234944  | -1.072647 | -2.289640 |
| H | 0.482214  | -2.296324 | -1.285784 |
| H | 2.939080  | -3.474388 | 0.039476  |
| H | 3.812577  | 1.710983  | 2.745751  |
| H | 2.088301  | 2.122747  | 2.212757  |
| H | -2.910846 | 1.525476  | -1.764889 |
| H | -2.872264 | 3.246335  | -1.047519 |
| H | 1.216480  | -2.602919 | 1.068886  |
| H | 0.325528  | -1.129035 | 1.402679  |
| H | 1.992279  | -1.271241 | 1.960264  |
| H | -3.641657 | -2.759223 | 0.829159  |
| H | -2.472244 | -1.856673 | 1.823622  |
| H | -3.432537 | 0.287424  | 1.033699  |
| H | -5.537147 | -1.445557 | -0.367372 |
| H | -5.561021 | 0.323677  | -0.260541 |
| H | -4.297566 | -0.497561 | -1.193611 |
| H | -4.307228 | -0.737642 | 3.137687  |
| H | -5.527896 | -1.621670 | 2.204666  |
| H | -5.591432 | 0.144912  | 2.295030  |

M062X energy = -1154.62338172 a.u.

(1R,5S,6R,7R,8S,10R)-3, Conf. A

|   |           |           |           |
|---|-----------|-----------|-----------|
| C | 3.833741  | -2.546348 | -0.208990 |
| C | 4.579199  | -1.245377 | -0.538008 |
| C | 3.876148  | -0.042908 | 0.045359  |
| C | 2.418900  | 0.030622  | -0.348433 |
| C | 1.658297  | -1.262696 | 0.117081  |
| C | 2.353584  | -2.450784 | -0.577008 |
| C | 1.631311  | 1.219834  | 0.155957  |
| C | 0.221901  | 1.232588  | -0.441742 |
| C | -0.565433 | 0.048450  | 0.065554  |
| C | 0.178789  | -1.232550 | -0.331477 |
| O | 2.161026  | 2.508790  | -0.192525 |
| C | 1.133610  | 3.412201  | -0.200646 |
| C | -0.164834 | 2.652797  | -0.170522 |
| O | 1.650593  | -3.626624 | -0.220592 |
| C | 4.487748  | 0.838151  | 0.834393  |
| C | -1.332622 | 3.236060  | 0.070673  |
| O | 1.307844  | 4.595656  | -0.239831 |
| H | 2.376021  | 0.051895  | -1.450663 |
| C | 1.721924  | -1.445959 | 1.644436  |
| O | -1.854492 | 0.087161  | -0.567018 |
| C | -2.839832 | -0.606877 | 0.040772  |
| O | -2.683174 | -1.220482 | 1.067193  |
| C | -4.129242 | -0.521212 | -0.743170 |
| C | -5.356706 | -0.900252 | 0.085493  |
| C | -5.594981 | 0.117240  | 1.201484  |
| C | -6.583528 | -1.016105 | -0.817976 |
| H | 3.916754  | -2.776622 | 0.858872  |
| H | 4.287805  | -3.384194 | -0.754324 |
| H | 4.618066  | -1.131490 | -1.631515 |

|   |           |           |           |
|---|-----------|-----------|-----------|
| H | 5.613146  | -1.293880 | -0.184353 |
| H | 2.272626  | -2.282877 | -1.666661 |
| H | 1.571200  | 1.182918  | 1.253198  |
| H | 0.334802  | 1.118959  | -1.532136 |
| H | -0.717123 | 0.108290  | 1.148082  |
| H | 0.129052  | -1.306319 | -1.427207 |
| H | -0.337444 | -2.103926 | 0.080417  |
| H | 2.112138  | -4.382527 | -0.609593 |
| H | 5.536595  | 0.717110  | 1.091498  |
| H | 3.985268  | 1.718200  | 1.221688  |
| H | -2.260099 | 2.672992  | 0.084594  |
| H | -1.369265 | 4.305610  | 0.256555  |
| H | 1.004753  | -0.804785 | 2.164292  |
| H | 2.714350  | -1.216689 | 2.041732  |
| H | 1.472440  | -2.481487 | 1.890061  |
| H | -4.225039 | 0.490654  | -1.155256 |
| H | -4.018385 | -1.192608 | -1.605377 |
| H | -5.154948 | -1.874971 | 0.545130  |
| H | -6.468048 | -0.160008 | 1.800063  |
| H | -4.732745 | 0.178820  | 1.871021  |
| H | -5.782451 | 1.112359  | 0.778982  |
| H | -7.467834 | -1.299863 | -0.239393 |
| H | -6.436675 | -1.765903 | -1.602248 |
| H | -6.797178 | -0.056918 | -1.304665 |

M062X energy = -1154.62459410 a.u.

(1R,5S,6R,7R,8S,10R)-3, Conf. B

|   |           |           |           |
|---|-----------|-----------|-----------|
| C | 3.815496  | -2.569178 | -0.215486 |
| C | 4.568062  | -1.270010 | -0.532584 |
| C | 3.873952  | -0.061980 | 0.049783  |
| C | 2.418015  | 0.023948  | -0.346704 |
| C | 1.652294  | -1.265174 | 0.118428  |
| C | 2.341197  | -2.462960 | -0.583619 |
| C | 1.638959  | 1.218384  | 0.158303  |
| C | 0.229962  | 1.242111  | -0.440372 |
| C | -0.567258 | 0.065960  | 0.067873  |
| C | 0.170580  | -1.221488 | -0.323122 |
| O | 2.176780  | 2.504189  | -0.188356 |
| C | 1.156111  | 3.414797  | -0.195955 |
| C | -0.147923 | 2.664541  | -0.168298 |
| O | 1.744493  | -3.700824 | -0.248098 |
| C | 4.488976  | 0.814967  | 0.840809  |
| C | -1.311861 | 3.255653  | 0.072092  |
| O | 1.337495  | 4.597033  | -0.233235 |
| H | 2.377227  | 0.046160  | -1.449339 |
| C | 1.717185  | -1.457120 | 1.643341  |
| O | -1.855827 | 0.115297  | -0.564131 |
| C | -2.837708 | -0.602345 | 0.022084  |
| O | -2.669303 | -1.262960 | 1.017397  |
| C | -4.135354 | -0.478565 | -0.742309 |
| C | -5.354773 | -0.893224 | 0.081544  |
| C | -5.579008 | 0.072717  | 1.245240  |
| C | -6.591057 | -0.965076 | -0.813559 |
| H | 3.893669  | -2.807605 | 0.851036  |
| H | 4.249147  | -3.411338 | -0.763281 |
| H | 4.615432  | -1.151380 | -1.625357 |

|   |           |           |           |
|---|-----------|-----------|-----------|
| H | 5.599590  | -1.326891 | -0.173090 |
| H | 2.264037  | -2.291151 | -1.672802 |
| H | 1.577866  | 1.179571  | 1.255627  |
| H | 0.342099  | 1.127394  | -1.530722 |
| H | -0.717189 | 0.125812  | 1.150729  |
| H | 0.108899  | -1.301662 | -1.419078 |
| H | -0.365844 | -2.071713 | 0.112586  |
| H | 0.859114  | -3.730558 | -0.636487 |
| H | 5.536036  | 0.685775  | 1.100984  |
| H | 3.992376  | 1.698811  | 1.227161  |
| H | -2.243644 | 2.699756  | 0.084123  |
| H | -1.340638 | 4.325215  | 0.259210  |
| H | 0.988512  | -0.834663 | 2.170622  |
| H | 2.706018  | -1.215270 | 2.041317  |
| H | 1.490517  | -2.501018 | 1.878653  |
| H | -4.233204 | 0.551529  | -1.105806 |
| H | -4.036149 | -1.108785 | -1.636516 |
| H | -5.150836 | -1.888474 | 0.493926  |
| H | -4.710228 | 0.102770  | 1.908444  |
| H | -5.768937 | 1.086260  | 0.870535  |
| H | -6.446406 | -0.230323 | 1.839396  |
| H | -7.469990 | -1.272430 | -0.239019 |
| H | -6.454766 | -1.679080 | -1.632368 |
| H | -6.806895 | 0.015653  | -1.254043 |

M062X energy = -1154.62456863 a.u.

(1R,5S,6R,7R,8S,10R)-3, Conf. C

|   |           |           |           |
|---|-----------|-----------|-----------|
| C | 3.387173  | -2.913973 | -0.308731 |
| C | 4.294019  | -1.733437 | -0.681319 |
| C | 3.811981  | -0.439560 | -0.069996 |
| C | 2.361297  | -0.150926 | -0.380587 |
| C | 1.452064  | -1.319290 | 0.141154  |
| C | 1.922843  | -2.602355 | -0.589764 |
| C | 1.788043  | 1.141621  | 0.157346  |
| C | 0.362832  | 1.361053  | -0.357951 |
| C | -0.558628 | 0.309954  | 0.211783  |
| C | -0.032946 | -1.068664 | -0.211205 |
| O | 2.479365  | 2.338257  | -0.233358 |
| C | 1.597913  | 3.383122  | -0.192884 |
| C | 0.205039  | 2.824173  | -0.084937 |
| O | 1.179969  | -3.743984 | -0.208078 |
| C | 4.589762  | 0.343068  | 0.675341  |
| C | -0.849729 | 3.576769  | 0.202996  |
| O | 1.940710  | 4.528061  | -0.253053 |
| H | 2.258215  | -0.124662 | -1.479066 |
| C | 1.581487  | -1.517790 | 1.661150  |
| O | -1.865204 | 0.538292  | -0.339086 |
| C | -2.897672 | -0.043317 | 0.308425  |
| O | -2.757321 | -0.745849 | 1.278953  |
| C | -4.217010 | 0.335571  | -0.323337 |
| C | -5.385597 | -0.522683 | 0.160937  |
| C | -6.706967 | 0.073220  | -0.322924 |
| C | -5.235068 | -1.968930 | -0.311569 |
| H | 3.494754  | -3.160337 | 0.753383  |
| H | 3.665184  | -3.808970 | -0.873582 |
| H | 4.292306  | -1.623324 | -1.776009 |

|   |           |           |           |
|---|-----------|-----------|-----------|
| H | 5.327005  | -1.934323 | -0.382800 |
| H | 1.805209  | -2.422171 | -1.673957 |
| H | 1.787583  | 1.113999  | 1.256691  |
| H | 0.391867  | 1.225880  | -1.451302 |
| H | -0.629192 | 0.391740  | 1.301369  |
| H | -0.171901 | -1.139623 | -1.300698 |
| H | -0.655253 | -1.835205 | 0.263266  |
| H | 0.277556  | -3.649539 | -0.543320 |
| H | 5.622072  | 0.068536  | 0.874556  |
| H | 4.245669  | 1.288105  | 1.082273  |
| H | -1.848754 | 3.158638  | 0.267326  |
| H | -0.717530 | 4.641133  | 0.374666  |
| H | 2.617041  | -1.419868 | 1.996944  |
| H | 1.222845  | -2.518425 | 1.919175  |
| H | 0.982664  | -0.797140 | 2.225522  |
| H | -4.387286 | 1.395261  | -0.088433 |
| H | -4.108619 | 0.281744  | -1.413519 |
| H | -5.368371 | -0.514873 | 1.257253  |
| H | -6.743135 | 0.094616  | -1.418688 |
| H | -7.554210 | -0.524454 | 0.026451  |
| H | -6.843259 | 1.097773  | 0.038349  |
| H | -6.067052 | -2.582224 | 0.047598  |
| H | -4.305859 | -2.410815 | 0.057600  |
| H | -5.234726 | -2.015450 | -1.407640 |

M062X energy = -1154.62454529 a.u.

(1R,5S,6R,7R,8S,10R)-3, Conf. D

|   |           |           |           |
|---|-----------|-----------|-----------|
| C | 3.399424  | -2.899986 | -0.305191 |
| C | 4.304741  | -1.718508 | -0.680726 |
| C | 3.814449  | -0.429535 | -0.065446 |
| C | 2.363509  | -0.146903 | -0.379721 |
| C | 1.451843  | -1.318561 | 0.133486  |
| C | 1.930125  | -2.592227 | -0.591658 |
| C | 1.782994  | 1.142033  | 0.159349  |
| C | 0.359418  | 1.357604  | -0.361561 |
| C | -0.560221 | 0.298701  | 0.198529  |
| C | -0.030575 | -1.074939 | -0.232916 |
| O | 2.473178  | 2.341613  | -0.225193 |
| C | 1.587714  | 3.383464  | -0.186031 |
| C | 0.196562  | 2.819506  | -0.084860 |
| O | 1.086992  | -3.656234 | -0.190659 |
| C | 4.588080  | 0.352074  | 0.685173  |
| C | -0.861676 | 3.567873  | 0.201518  |
| O | 1.928078  | 4.529546  | -0.242197 |
| H | 2.264088  | -0.117296 | -1.478117 |
| C | 1.572577  | -1.513693 | 1.655945  |
| O | -1.865400 | 0.523972  | -0.357819 |
| C | -2.900904 | -0.038043 | 0.301558  |
| O | -2.768882 | -0.702999 | 1.298919  |
| C | -4.215723 | 0.313226  | -0.356190 |
| C | -5.388909 | -0.518748 | 0.161338  |
| C | -6.706831 | 0.059439  | -0.352534 |
| C | -5.241536 | -1.984928 | -0.246287 |
| H | 3.507023  | -3.142971 | 0.757622  |
| H | 3.697997  | -3.792694 | -0.870408 |
| H | 4.299571  | -1.607891 | -1.775251 |

|   |           |           |           |
|---|-----------|-----------|-----------|
| H | 5.338848  | -1.916061 | -0.383957 |
| H | 1.813826  | -2.411562 | -1.676054 |
| H | 1.777932  | 1.112552  | 1.258429  |
| H | 0.394602  | 1.226894  | -1.455272 |
| H | -0.637312 | 0.377194  | 1.287860  |
| H | -0.151297 | -1.136930 | -1.323852 |
| H | -0.642728 | -1.864481 | 0.210750  |
| H | 1.413053  | -4.469275 | -0.600996 |
| H | 5.621156  | 0.081038  | 0.885476  |
| H | 4.238776  | 1.293785  | 1.095262  |
| H | -1.859192 | 3.145460  | 0.261151  |
| H | -0.734181 | 4.632255  | 0.376655  |
| H | 0.987972  | -0.775110 | 2.211304  |
| H | 2.608463  | -1.434748 | 1.996582  |
| H | 1.187053  | -2.501771 | 1.920401  |
| H | -4.385290 | 1.383513  | -0.174939 |
| H | -4.100409 | 0.205321  | -1.441667 |
| H | -5.375080 | -0.462642 | 1.256335  |
| H | -7.557251 | -0.520321 | 0.018864  |
| H | -6.841465 | 1.099107  | -0.036385 |
| H | -6.738843 | 0.033783  | -1.448374 |
| H | -4.313360 | -2.412140 | 0.141857  |
| H | -5.240432 | -2.079798 | -1.339237 |
| H | -6.075607 | -2.579508 | 0.138913  |

M062X energy = -1154.62452275 a.u.

(1R,5S,6R,7R,8S,10R)-3, Conf. E

|   |           |           |           |
|---|-----------|-----------|-----------|
| C | 4.258064  | -1.864564 | -0.327588 |
| C | 4.669579  | -0.430248 | -0.685438 |
| C | 3.744104  | 0.590320  | -0.067227 |
| C | 2.289704  | 0.329606  | -0.385307 |
| C | 1.870637  | -1.095891 | 0.119939  |
| C | 2.782652  | -2.109673 | -0.616690 |
| C | 1.281334  | 1.315552  | 0.161502  |
| C | -0.124951 | 1.004480  | -0.359309 |
| C | -0.599991 | -0.320327 | 0.186405  |
| C | 0.399381  | -1.403272 | -0.243922 |
| O | 1.487028  | 2.686571  | -0.214702 |
| C | 0.284454  | 3.335645  | -0.167665 |
| C | -0.806533 | 2.304310  | -0.066003 |
| O | 2.509952  | -3.447773 | -0.248287 |
| C | 4.178002  | 1.595896  | 0.690134  |
| C | -2.059605 | 2.615173  | 0.242634  |
| O | 0.183822  | 4.527110  | -0.216871 |
| H | 2.187116  | 0.328344  | -1.484171 |
| C | 2.055923  | -1.248321 | 1.639406  |
| O | -1.892753 | -0.580300 | -0.381589 |
| C | -2.637869 | -1.526436 | 0.234371  |
| O | -2.257381 | -2.140616 | 1.199432  |
| C | -3.987031 | -1.664565 | -0.425969 |
| C | -4.797809 | -0.359716 | -0.357608 |
| C | -6.150641 | -0.547980 | -1.041416 |
| C | -4.976901 | 0.091490  | 1.092463  |
| H | 4.444222  | -2.063738 | 0.733596  |
| H | 4.847439  | -2.589970 | -0.896605 |
| H | 4.631254  | -0.318116 | -1.779245 |

|   |           |           |           |
|---|-----------|-----------|-----------|
| H | 5.703156  | -0.240719 | -0.381581 |
| H | 2.611195  | -1.975228 | -1.700396 |
| H | 1.289694  | 1.278113  | 1.260517  |
| H | -0.046690 | 0.907299  | -1.454345 |
| H | -0.707301 | -0.287172 | 1.275815  |
| H | 0.302730  | -1.506107 | -1.335491 |
| H | 0.098890  | -2.350556 | 0.216603  |
| H | 1.635967  | -3.687993 | -0.586109 |
| H | 5.238358  | 1.716862  | 0.894396  |
| H | 3.509835  | 2.344547  | 1.102597  |
| H | -2.836010 | 1.860057  | 0.311787  |
| H | -2.322936 | 3.651994  | 0.431248  |
| H | 2.979790  | -0.777466 | 1.985083  |
| H | 2.091613  | -2.313260 | 1.886518  |
| H | 1.229587  | -0.806665 | 2.203811  |
| H | -3.836145 | -1.951523 | -1.472947 |
| H | -4.516998 | -2.473529 | 0.085313  |
| H | -4.233544 | 0.407479  | -0.903263 |
| H | -6.031896 | -0.853848 | -2.085652 |
| H | -6.737010 | -1.318188 | -0.527125 |
| H | -6.728935 | 0.380764  | -1.023426 |
| H | -5.538298 | -0.659876 | 1.659746  |
| H | -4.016224 | 0.234609  | 1.600581  |
| H | -5.529217 | 1.035087  | 1.142611  |

M062X energy = -1154.62437551 a.u.

(1R,5S,6R,7R,8S,10R)-3, Conf. F

|   |           |           |           |
|---|-----------|-----------|-----------|
| C | 4.260473  | -1.855664 | -0.332154 |
| C | 4.670951  | -0.422763 | -0.699100 |
| C | 3.745026  | 0.593931  | -0.075034 |
| C | 2.290236  | 0.329234  | -0.387492 |
| C | 1.870656  | -1.097800 | 0.116358  |
| C | 2.779642  | -2.103806 | -0.617441 |
| C | 1.281452  | 1.312943  | 0.162824  |
| C | -0.125481 | 0.999232  | -0.354044 |
| C | -0.594752 | -0.328778 | 0.190800  |
| C | 0.401299  | -1.409231 | -0.250574 |
| O | 1.485181  | 2.684424  | -0.213652 |
| C | 0.281319  | 3.331480  | -0.163840 |
| C | -0.807526 | 2.298467  | -0.059163 |
| O | 2.384214  | -3.404880 | -0.224605 |
| C | 4.181631  | 1.598927  | 0.681450  |
| C | -2.060518 | 2.607662  | 0.251665  |
| O | 0.179798  | 4.523068  | -0.213238 |
| H | 2.183455  | 0.328989  | -1.485610 |
| C | 2.056393  | -1.245981 | 1.637477  |
| O | -1.889338 | -0.590976 | -0.372733 |
| C | -2.643832 | -1.513547 | 0.266734  |
| O | -2.281639 | -2.090796 | 1.260699  |
| C | -3.983451 | -1.672994 | -0.408863 |
| C | -4.800121 | -0.370371 | -0.378504 |
| C | -6.137216 | -0.573572 | -1.088539 |
| C | -5.012811 | 0.102273  | 1.060176  |
| H | 4.451346  | -2.049490 | 0.729103  |
| H | 4.863316  | -2.573987 | -0.903240 |
| H | 4.623507  | -0.314428 | -1.792829 |

|   |           |           |           |
|---|-----------|-----------|-----------|
| H | 5.706362  | -0.230883 | -0.403146 |
| H | 2.603247  | -1.970557 | -1.700633 |
| H | 1.292697  | 1.276229  | 1.261641  |
| H | -0.049843 | 0.903332  | -1.449385 |
| H | -0.699235 | -0.296496 | 1.280404  |
| H | 0.310699  | -1.500896 | -1.342389 |
| H | 0.120140  | -2.371693 | 0.184650  |
| H | 2.983353  | -4.039946 | -0.641047 |
| H | 5.242804  | 1.722221  | 0.880287  |
| H | 3.513581  | 2.345258  | 1.098191  |
| H | -2.835022 | 1.850750  | 0.322604  |
| H | -2.325665 | 3.644047  | 0.440187  |
| H | 2.991035  | -0.793992 | 1.980271  |
| H | 2.061313  | -2.308463 | 1.894265  |
| H | 1.241599  | -0.778356 | 2.197070  |
| H | -3.816962 | -1.981223 | -1.447245 |
| H | -4.517483 | -2.472701 | 0.112685  |
| H | -4.226689 | 0.390624  | -0.923403 |
| H | -6.719921 | 0.352662  | -1.095758 |
| H | -5.994561 | -0.893265 | -2.125618 |
| H | -6.731190 | -1.339494 | -0.576488 |
| H | -4.064340 | 0.250136  | 1.589138  |
| H | -5.588921 | -0.640256 | 1.624403  |
| H | -5.564566 | 1.047302  | 1.083705  |

M062X energy = -1154.62427202 a.u.

(1R,5S,6R,7R,8S,10R)-3, Conf. G

|   |           |           |           |
|---|-----------|-----------|-----------|
| C | 3.825914  | -2.557344 | -0.242769 |
| C | 4.573852  | -1.249432 | -0.538220 |
| C | 3.871170  | -0.055929 | 0.063143  |
| C | 2.417847  | 0.027778  | -0.341205 |
| C | 1.648876  | -1.264382 | 0.110500  |
| C | 2.341238  | -2.459307 | -0.591574 |
| C | 1.633817  | 1.222243  | 0.156970  |
| C | 0.225634  | 1.241219  | -0.443595 |
| C | -0.566593 | 0.058723  | 0.061150  |
| C | 0.173308  | -1.221663 | -0.345188 |
| O | 2.171497  | 2.507260  | -0.191913 |
| C | 1.148407  | 3.416192  | -0.200888 |
| C | -0.154143 | 2.663364  | -0.172292 |
| O | 1.671758  | -3.681973 | -0.350022 |
| C | 4.477591  | 0.809652  | 0.872993  |
| C | -1.319224 | 3.252676  | 0.067262  |
| O | 1.328730  | 4.598605  | -0.239172 |
| H | 2.383660  | 0.050259  | -1.443849 |
| C | 1.701347  | -1.451728 | 1.636177  |
| O | -1.857546 | 0.104935  | -0.565896 |
| C | -2.838697 | -0.599873 | 0.036652  |
| O | -2.675141 | -1.225629 | 1.054893  |
| C | -4.131131 | -0.509205 | -0.741145 |
| C | -5.354616 | -0.900814 | 0.087630  |
| C | -5.591654 | 0.103376  | 1.215871  |
| C | -6.584219 | -1.009572 | -0.812932 |
| H | 3.928408  | -2.805946 | 0.822794  |
| H | 4.261648  | -3.387309 | -0.808271 |
| H | 4.618465  | -1.115272 | -1.628914 |

|   |           |           |           |
|---|-----------|-----------|-----------|
| H | 5.606067  | -1.307595 | -0.180755 |
| H | 2.245528  | -2.296551 | -1.674554 |
| H | 1.569378  | 1.190034  | 1.254024  |
| H | 0.340164  | 1.127931  | -1.533823 |
| H | -0.714432 | 0.114095  | 1.144651  |
| H | 0.130655  | -1.282566 | -1.441854 |
| H | -0.350182 | -2.097028 | 0.048788  |
| H | 1.951548  | -4.010004 | 0.516725  |
| H | 5.523940  | 0.682455  | 1.137123  |
| H | 3.973809  | 1.684945  | 1.269682  |
| H | -2.249583 | 2.694404  | 0.079516  |
| H | -1.350523 | 4.322431  | 0.252937  |
| H | 2.711106  | -1.320537 | 2.033684  |
| H | 1.343251  | -2.453282 | 1.897735  |
| H | 1.050129  | -0.749582 | 2.163386  |
| H | -4.231187 | 0.506797  | -1.141851 |
| H | -4.021319 | -1.170850 | -1.610981 |
| H | -5.148857 | -1.880249 | 0.535334  |
| H | -4.727308 | 0.160017  | 1.883151  |
| H | -5.783387 | 1.102636  | 0.805283  |
| H | -6.461859 | -0.183023 | 1.814295  |
| H | -6.438276 | -1.750320 | -1.605873 |
| H | -6.801728 | -0.045574 | -1.288245 |
| H | -7.465855 | -1.301759 | -0.234496 |

M062X energy = -1154.62426701 a.u.

(1R,5S,6R,7R,8S,10R)-3, Conf. H

|   |           |           |           |
|---|-----------|-----------|-----------|
| C | 3.387719  | -2.910391 | -0.337699 |
| C | 4.297091  | -1.722895 | -0.684417 |
| C | 3.808202  | -0.441933 | -0.052083 |
| C | 2.361227  | -0.150343 | -0.374181 |
| C | 1.442005  | -1.319003 | 0.129555  |
| C | 1.914658  | -2.600342 | -0.601757 |
| C | 1.785609  | 1.143850  | 0.158244  |
| C | 0.362595  | 1.364462  | -0.362330 |
| C | -0.560337 | 0.308099  | 0.198280  |
| C | -0.035842 | -1.064497 | -0.241974 |
| O | 2.481643  | 2.338223  | -0.230307 |
| C | 1.600943  | 3.384672  | -0.190803 |
| C | 0.207089  | 2.827398  | -0.086660 |
| O | 1.092331  | -3.714660 | -0.312901 |
| C | 4.577480  | 0.326377  | 0.716499  |
| C | -0.847224 | 3.581041  | 0.200408  |
| O | 1.946684  | 4.528909  | -0.248359 |
| H | 2.267900  | -0.122330 | -1.473282 |
| C | 1.554056  | -1.513377 | 1.651192  |
| O | -1.867039 | 0.540361  | -0.350292 |
| C | -2.899136 | -0.031662 | 0.306088  |
| O | -2.760877 | -0.708768 | 1.294677  |
| C | -4.217322 | 0.325153  | -0.341222 |
| C | -5.384708 | -0.522829 | 0.163444  |
| C | -6.706869 | 0.057428  | -0.337004 |
| C | -5.229971 | -1.980308 | -0.271708 |
| H | 3.514822  | -3.172440 | 0.721966  |
| H | 3.666894  | -3.793570 | -0.921261 |
| H | 4.297736  | -1.594951 | -1.776771 |



|   |           |           |           |
|---|-----------|-----------|-----------|
| H | 5.329150  | -1.928985 | -0.386058 |
| H | 1.780989  | -2.424908 | -1.678736 |
| H | 1.779777  | 1.121095  | 1.257393  |
| H | 0.396912  | 1.233068  | -1.455961 |
| H | -0.632174 | 0.382552  | 1.288455  |
| H | -0.149561 | -1.115774 | -1.334061 |
| H | -0.655570 | -1.856848 | 0.185950  |
| H | 1.371672  | -4.079655 | 0.539083  |
| H | 5.608109  | 0.049966  | 0.921900  |
| H | 4.227712  | 1.264146  | 1.135491  |
| H | -1.846618 | 3.163361  | 0.261708  |
| H | -0.714463 | 4.645037  | 0.373976  |
| H | 1.042949  | -0.724466 | 2.209253  |
| H | 2.593202  | -1.530539 | 1.989926  |
| H | 1.069955  | -2.452445 | 1.940203  |
| H | -4.391917 | 1.390788  | -0.138422 |
| H | -4.104378 | 0.238938  | -1.428817 |
| H | -5.368826 | -0.486648 | 1.259273  |
| H | -6.741087 | 0.051636  | -1.433035 |
| H | -7.553212 | -0.533852 | 0.025395  |
| H | -6.846623 | 1.090319  | -0.001473 |
| H | -5.231085 | -2.055079 | -1.366138 |
| H | -6.059521 | -2.586782 | 0.104560  |
| H | -4.298285 | -2.409569 | 0.105722  |

M062X energy = -1154.62418740 a.u.

(1R,5S,6R,7R,8S,10R)-3, Conf. I

|   |           |           |           |
|---|-----------|-----------|-----------|
| C | 3.266066  | -2.837859 | -0.404467 |
| C | 4.061970  | -1.659548 | -0.981466 |
| C | 3.639744  | -0.343774 | -0.372527 |
| C | 2.149182  | -0.109572 | -0.460788 |
| C | 1.374725  | -1.267113 | 0.263222  |
| C | 1.765951  | -2.579206 | -0.462842 |
| C | 1.626477  | 1.198046  | 0.092008  |
| C | 0.130420  | 1.352723  | -0.196336 |
| C | -0.652974 | 0.314003  | 0.568849  |
| C | -0.154597 | -1.073349 | 0.140845  |
| O | 2.205559  | 2.386171  | -0.469920 |
| C | 1.307639  | 3.410021  | -0.343060 |
| C | -0.029541 | 2.824755  | 0.021934  |
| O | 1.132188  | -3.714083 | 0.095005  |
| C | 4.499543  | 0.500862  | 0.193433  |
| C | -1.046845 | 3.565640  | 0.443819  |
| O | 1.597654  | 4.557338  | -0.520804 |
| H | 1.871358  | -0.150671 | -1.528068 |
| C | 1.750931  | -1.371861 | 1.751108  |
| O | -2.036488 | 0.473381  | 0.221611  |
| C | -2.931518 | -0.122423 | 1.043307  |
| O | -2.612649 | -0.744589 | 2.025042  |
| C | -4.339801 | 0.081035  | 0.543263  |
| C | -4.540941 | -0.494192 | -0.868759 |
| C | -4.154541 | -1.972658 | -0.912600 |
| C | -5.989399 | -0.293119 | -1.309948 |
| H | 3.549613  | -3.018690 | 0.638257  |
| H | 3.480498  | -3.757436 | -0.957420 |
| H | 3.883063  | -1.614648 | -2.066114 |

|   |           |           |           |
|---|-----------|-----------|-----------|
| H | 5.135425  | -1.816858 | -0.841820 |
| H | 1.471279  | -2.466442 | -1.522249 |
| H | 1.803201  | 1.235100  | 1.176767  |
| H | -0.011375 | 1.156309  | -1.271543 |
| H | -0.553743 | 0.457081  | 1.649754  |
| H | -0.461720 | -1.209379 | -0.907843 |
| H | -0.668348 | -1.826678 | 0.748635  |
| H | 0.185199  | -3.662381 | -0.095427 |
| H | 5.559031  | 0.263882  | 0.238685  |
| H | 4.193027  | 1.459847  | 0.597727  |
| H | -2.006179 | 3.126524  | 0.696495  |
| H | -0.924129 | 4.640854  | 0.536867  |
| H | 1.225438  | -0.634116 | 2.364268  |
| H | 2.822810  | -1.228250 | 1.909552  |
| H | 1.472265  | -2.363988 | 2.117787  |
| H | -5.009514 | -0.407222 | 1.257258  |
| H | -4.559664 | 1.155217  | 0.539210  |
| H | -3.882747 | 0.059852  | -1.548659 |
| H | -3.100350 | -2.121807 | -0.652564 |
| H | -4.758979 | -2.550687 | -0.203979 |
| H | -4.315211 | -2.387451 | -1.912313 |
| H | -6.142328 | -0.665481 | -2.327438 |
| H | -6.270596 | 0.764600  | -1.289890 |
| H | -6.672399 | -0.837294 | -0.647385 |

M062X energy = -1154.62406363 a.u.

(1R,5S,6R,7R,8S,10R)-3, Conf. J

|   |           |           |           |
|---|-----------|-----------|-----------|
| C | 3.227157  | -2.866647 | -0.389473 |
| C | 4.042163  | -1.703983 | -0.973061 |
| C | 3.634833  | -0.383003 | -0.365027 |
| C | 2.147865  | -0.129578 | -0.458917 |
| C | 1.349372  | -1.274301 | 0.261540  |
| C | 1.726266  | -2.586042 | -0.455145 |
| C | 1.640190  | 1.185653  | 0.090095  |
| C | 0.148246  | 1.360396  | -0.206676 |
| C | -0.653647 | 0.330888  | 0.553106  |
| C | -0.176084 | -1.062723 | 0.124379  |
| O | 2.240205  | 2.364387  | -0.470175 |
| C | 1.355646  | 3.400987  | -0.349905 |
| C | 0.008675  | 2.834984  | 0.008586  |
| O | 0.974227  | -3.629129 | 0.136585  |
| C | 4.505362  | 0.448665  | 0.203620  |
| C | -1.000493 | 3.590814  | 0.423588  |
| O | 1.663934  | 4.543686  | -0.527977 |
| H | 1.873862  | -0.167175 | -1.526957 |
| C | 1.714654  | -1.376025 | 1.753670  |
| O | -2.032756 | 0.508623  | 0.196249  |
| C | -2.941837 | -0.045960 | 1.031230  |
| O | -2.641691 | -0.628945 | 2.042068  |
| C | -4.341751 | 0.147465  | 0.503927  |
| C | -4.535610 | -0.517761 | -0.869336 |
| C | -4.179995 | -2.003286 | -0.807742 |
| C | -5.973100 | -0.316708 | -1.344998 |
| H | 3.506381  | -3.044845 | 0.654790  |
| H | 3.446294  | -3.789615 | -0.942339 |
| H | 3.862055  | -1.660180 | -2.057451 |

|   |           |           |           |
|---|-----------|-----------|-----------|
| H | 5.113301  | -1.876184 | -0.833407 |
| H | 1.436257  | -2.471594 | -1.515794 |
| H | 1.811616  | 1.222522  | 1.175520  |
| H | 0.010367  | 1.165588  | -1.282690 |
| H | -0.560733 | 0.474667  | 1.634440  |
| H | -0.468833 | -1.191368 | -0.928015 |
| H | -0.696395 | -1.827990 | 0.707176  |
| H | 1.243953  | -4.463528 | -0.271776 |
| H | 5.561463  | 0.197313  | 0.251700  |
| H | 4.210402  | 1.411574  | 0.607073  |
| H | -1.966918 | 3.164760  | 0.671573  |
| H | -0.863862 | 4.664450  | 0.515625  |
| H | 2.790112  | -1.268657 | 1.918324  |
| H | 1.393182  | -2.349082 | 2.134054  |
| H | 1.213518  | -0.609538 | 2.351166  |
| H | -5.027091 | -0.283453 | 1.239702  |
| H | -4.544162 | 1.222197  | 0.425867  |
| H | -3.856305 | -0.023660 | -1.574440 |
| H | -4.337034 | -2.480737 | -1.779788 |
| H | -3.133802 | -2.159167 | -0.522372 |
| H | -4.807567 | -2.518831 | -0.071451 |
| H | -6.232105 | 0.745526  | -1.400266 |
| H | -6.676558 | -0.801017 | -0.657711 |
| H | -6.120235 | -0.753948 | -2.337307 |

M062X energy = -1154.62405963 a.u.

(1R,5S,6R,7R,8S,10R)-3, Conf. K

|   |           |           |           |
|---|-----------|-----------|-----------|
| C | 3.032557  | -3.071652 | -0.288856 |
| C | 3.977261  | -1.985888 | -0.823126 |
| C | 3.649834  | -0.631839 | -0.239930 |
| C | 2.198116  | -0.252547 | -0.420902 |
| C | 1.263721  | -1.321158 | 0.251291  |
| C | 1.567830  | -2.663640 | -0.442642 |
| C | 1.773547  | 1.103623  | 0.097986  |
| C | 0.321843  | 1.404228  | -0.286361 |
| C | -0.608292 | 0.450430  | 0.424631  |
| C | -0.227350 | -0.981006 | 0.024659  |
| O | 2.504313  | 2.224139  | -0.425008 |
| C | 1.706245  | 3.333207  | -0.356516 |
| C | 0.296754  | 2.886419  | -0.079493 |
| O | 0.695593  | -3.635942 | 0.103025  |
| C | 4.553626  | 0.125115  | 0.379007  |
| C | -0.666817 | 3.728674  | 0.272880  |
| O | 2.121523  | 4.444513  | -0.514812 |
| H | 1.984746  | -0.271531 | -1.503196 |
| C | 1.530738  | -1.446848 | 1.762315  |
| O | -1.944866 | 0.741606  | -0.013933 |
| C | -2.940672 | 0.269289  | 0.765759  |
| O | -2.751290 | -0.340159 | 1.789357  |
| C | -4.301545 | 0.552484  | 0.179501  |
| C | -5.007108 | -0.767065 | -0.175639 |
| C | -6.415123 | -0.485942 | -0.695105 |
| C | -4.190964 | -1.559549 | -1.197277 |
| H | 3.233797  | -3.268164 | 0.769985  |
| H | 3.203651  | -4.012633 | -0.828150 |
| H | 3.865506  | -1.932098 | -1.916220 |

|   |           |           |           |
|---|-----------|-----------|-----------|
| H | 5.019613  | -2.248486 | -0.620568 |
| H | 1.351435  | -2.529301 | -1.518374 |
| H | 1.883303  | 1.130324  | 1.191663  |
| H | 0.231186  | 1.216655  | -1.368579 |
| H | -0.568169 | 0.591011  | 1.509604  |
| H | -0.468256 | -1.089775 | -1.042844 |
| H | -0.843885 | -1.696075 | 0.576392  |
| H | 0.916182  | -4.491893 | -0.289918 |
| H | 5.579685  | -0.215345 | 0.489108  |
| H | 4.319039  | 1.111766  | 0.764356  |
| H | -1.679939 | 3.389668  | 0.461396  |
| H | -0.443392 | 4.787005  | 0.372271  |
| H | 1.060150  | -0.639398 | 2.329953  |
| H | 2.599743  | -1.428164 | 1.990589  |
| H | 1.107888  | -2.388513 | 2.121979  |
| H | -4.884740 | 1.091849  | 0.933562  |
| H | -4.202765 | 1.185324  | -0.707760 |
| H | -5.075327 | -1.353409 | 0.748873  |
| H | -6.374436 | 0.105056  | -1.617684 |
| H | -6.941338 | -1.418986 | -0.918793 |
| H | -7.008130 | 0.071199  | 0.037184  |
| H | -4.048973 | -0.974291 | -2.113734 |
| H | -4.701991 | -2.489092 | -1.465911 |
| H | -3.201974 | -1.823983 | -0.807320 |

M062X energy = -1154.62398391 a.u.

(1R,5S,6R,7R,8S,10R)-3, Conf. L

|   |           |           |           |
|---|-----------|-----------|-----------|
| C | 4.261566  | -1.856199 | -0.364088 |
| C | 4.669499  | -0.413947 | -0.696921 |
| C | 3.742652  | 0.590840  | -0.055720 |
| C | 2.290009  | 0.331407  | -0.380125 |
| C | 1.866370  | -1.098021 | 0.110550  |
| C | 2.777815  | -2.108063 | -0.630583 |
| C | 1.278893  | 1.317475  | 0.162364  |
| C | -0.126784 | 1.004255  | -0.358341 |
| C | -0.596446 | -0.324567 | 0.185264  |
| C | 0.398870  | -1.402087 | -0.264075 |
| O | 1.486155  | 2.687507  | -0.215586 |
| C | 0.282599  | 3.336234  | -0.168156 |
| C | -0.807916 | 2.304473  | -0.065351 |
| O | 2.424069  | -3.449831 | -0.355736 |
| C | 4.174489  | 1.581733  | 0.721773  |
| C | -2.061504 | 2.615409  | 0.241333  |
| O | 0.182678  | 4.527797  | -0.217533 |
| H | 2.192337  | 0.333455  | -1.479221 |
| C | 2.042226  | -1.251185 | 1.630738  |
| O | -1.893193 | -0.585290 | -0.372552 |
| C | -2.639859 | -1.516164 | 0.264327  |
| O | -2.267479 | -2.099749 | 1.251068  |
| C | -3.982898 | -1.676669 | -0.403706 |
| C | -4.800289 | -0.374614 | -0.371723 |
| C | -6.141764 | -0.580866 | -1.072534 |
| C | -5.003840 | 0.101828  | 1.067030  |
| H | 4.476297  | -2.063491 | 0.693534  |
| H | 4.846351  | -2.568783 | -0.954601 |
| H | 4.623604  | -0.284468 | -1.788130 |

|   |           |           |           |
|---|-----------|-----------|-----------|
| H | 5.704687  | -0.227969 | -0.396187 |
| H | 2.588790  | -1.983586 | -1.706352 |
| H | 1.283983  | 1.285069  | 1.261265  |
| H | -0.048469 | 0.908397  | -1.453458 |
| H | -0.696445 | -0.295103 | 1.275564  |
| H | 0.312973  | -1.480689 | -1.357128 |
| H | 0.113951  | -2.371059 | 0.154007  |
| H | 2.810086  | -3.692184 | 0.498340  |
| H | 5.234389  | 1.702638  | 0.928576  |
| H | 3.503607  | 2.320793  | 1.147219  |
| H | -2.837232 | 1.859528  | 0.309874  |
| H | -2.325915 | 3.652273  | 0.428249  |
| H | 1.278701  | -0.707805 | 2.193614  |
| H | 3.016188  | -0.890912 | 1.972053  |
| H | 1.934003  | -2.304508 | 1.911059  |
| H | -3.821105 | -1.986893 | -1.442273 |
| H | -4.513593 | -2.476158 | 0.121555  |
| H | -4.231035 | 0.385371  | -0.922335 |
| H | -6.725056 | 0.344988  | -1.078780 |
| H | -6.005512 | -0.903533 | -2.109525 |
| H | -6.731967 | -1.345632 | -0.554455 |
| H | -4.051819 | 0.253210  | 1.588701  |
| H | -5.574684 | -0.640010 | 1.637475  |
| H | -5.557083 | 1.045946  | 1.091737  |

M062X energy = -1154.62396566 a.u.

(1R,5S,6R,7R,8S,10R)-3, Conf. M

|   |           |           |           |
|---|-----------|-----------|-----------|
| C | 2.821778  | -3.170609 | -0.257677 |
| C | 3.833733  | -2.125929 | -0.748915 |
| C | 3.551696  | -0.763712 | -0.161220 |
| C | 2.126495  | -0.313715 | -0.385815 |
| C | 1.120435  | -1.343084 | 0.242906  |
| C | 1.383909  | -2.692064 | -0.455213 |
| C | 1.749622  | 1.056550  | 0.133430  |
| C | 0.327296  | 1.429967  | -0.294006 |
| C | -0.668969 | 0.514130  | 0.376248  |
| C | -0.343581 | -0.928874 | -0.030986 |
| O | 2.549770  | 2.145427  | -0.353688 |
| C | 1.803678  | 3.290812  | -0.298518 |
| C | 0.366371  | 2.909473  | -0.070476 |
| O | 0.448828  | -3.626711 | 0.050847  |
| C | 4.469073  | -0.057285 | 0.496212  |
| C | -0.565861 | 3.793598  | 0.263111  |
| O | 2.276167  | 4.382374  | -0.431805 |
| H | 1.949045  | -0.312235 | -1.474758 |
| C | 1.329591  | -1.495777 | 1.760497  |
| O | -1.976212 | 0.875921  | -0.094984 |
| C | -3.017299 | 0.463196  | 0.662480  |
| O | -2.882027 | -0.151155 | 1.692436  |
| C | -4.338212 | 0.828689  | 0.032430  |
| C | -4.964492 | -0.384089 | -0.691903 |
| C | -4.008018 | -0.960710 | -1.736953 |
| C | -5.414102 | -1.462054 | 0.293950  |
| H | 2.978031  | -3.386098 | 0.805037  |
| H | 2.966173  | -4.113666 | -0.801134 |
| H | 3.760486  | -2.056226 | -1.844363 |

|   |           |           |           |
|---|-----------|-----------|-----------|
| H | 4.855263  | -2.439954 | -0.515795 |
| H | 1.210316  | -2.537813 | -1.536041 |
| H | 1.824554  | 1.068022  | 1.230335  |
| H | 0.263243  | 1.258162  | -1.380763 |
| H | -0.653780 | 0.639772  | 1.463640  |
| H | -0.549387 | -1.011924 | -1.108084 |
| H | -1.014022 | -1.620441 | 0.487169  |
| H | 0.642202  | -4.488698 | -0.343241 |
| H | 5.473519  | -0.447552 | 0.636212  |
| H | 4.268851  | 0.935508  | 0.885163  |
| H | -1.599397 | 3.502362  | 0.417667  |
| H | -0.294687 | 4.838670  | 0.382120  |
| H | 0.881020  | -0.671064 | 2.321037  |
| H | 2.389925  | -1.532542 | 2.024318  |
| H | 0.848808  | -2.418483 | 2.095670  |
| H | -5.005714 | 1.165287  | 0.831196  |
| H | -4.183528 | 1.647034  | -0.675708 |
| H | -5.851162 | 0.001259  | -1.210981 |
| H | -3.631922 | -0.185533 | -2.412393 |
| H | -3.144041 | -1.432434 | -1.253388 |
| H | -4.509794 | -1.726900 | -2.335514 |
| H | -4.561917 | -1.857961 | 0.854390  |
| H | -5.890592 | -2.290974 | -0.238911 |
| H | -6.132543 | -1.063513 | 1.017183  |

M062X energy = -1154.62378129 a.u.

(1R,5S,6R,7R,8S,10R)-3, Conf. N

|   |           |           |           |
|---|-----------|-----------|-----------|
| C | 3.226288  | -2.867584 | -0.424804 |
| C | 4.045345  | -1.692135 | -0.976990 |
| C | 3.635363  | -0.381317 | -0.349595 |
| C | 2.149817  | -0.126125 | -0.453345 |
| C | 1.346879  | -1.273934 | 0.255244  |
| C | 1.724068  | -2.589909 | -0.469834 |
| C | 1.639215  | 1.190503  | 0.090236  |
| C | 0.147295  | 1.363907  | -0.207808 |
| C | -0.653452 | 0.331872  | 0.550613  |
| C | -0.175954 | -1.058349 | 0.111639  |
| O | 2.239650  | 2.367652  | -0.471705 |
| C | 1.354814  | 3.404581  | -0.351326 |
| C | 0.007701  | 2.838552  | 0.007503  |
| O | 0.979368  | -3.694807 | 0.005495  |
| C | 4.500150  | 0.441109  | 0.240804  |
| C | -1.001675 | 3.594496  | 0.421806  |
| O | 1.663126  | 4.547147  | -0.529154 |
| H | 1.883094  | -0.164074 | -1.523344 |
| C | 1.703250  | -1.377572 | 1.747847  |
| O | -2.033780 | 0.511288  | 0.201493  |
| C | -2.937180 | -0.057717 | 1.033198  |
| O | -2.628807 | -0.653800 | 2.034200  |
| C | -4.340230 | 0.138172  | 0.516210  |
| C | -4.540292 | -0.513424 | -0.862905 |
| C | -4.182289 | -1.998943 | -0.818668 |
| C | -5.980692 | -0.309436 | -1.328435 |
| H | 3.523480  | -3.065850 | 0.614418  |
| H | 3.428288  | -3.780084 | -0.994897 |
| H | 3.872386  | -1.629178 | -2.061302 |

|   |           |           |           |
|---|-----------|-----------|-----------|
| H | 5.115452  | -1.868215 | -0.833749 |
| H | 1.419588  | -2.478204 | -1.520243 |
| H | 1.808471  | 1.232702  | 1.175743  |
| H | 0.010468  | 1.169562  | -1.284004 |
| H | -0.555937 | 0.470219  | 1.632458  |
| H | -0.461582 | -1.176025 | -0.943813 |
| H | -0.702971 | -1.830567 | 0.679059  |
| H | 1.392024  | -4.003623 | 0.824958  |
| H | 5.555898  | 0.189655  | 0.295196  |
| H | 4.201142  | 1.398376  | 0.654956  |
| H | -1.968207 | 3.168486  | 0.669389  |
| H | -0.865137 | 4.668197  | 0.513231  |
| H | 1.270835  | -0.563324 | 2.335188  |
| H | 2.783192  | -1.362767 | 1.916213  |
| H | 1.290973  | -2.303520 | 2.163029  |
| H | -5.020481 | -0.302030 | 1.251193  |
| H | -4.545303 | 1.213203  | 0.450455  |
| H | -3.865709 | -0.010898 | -1.566592 |
| H | -4.804455 | -2.522848 | -0.083680 |
| H | -4.344763 | -2.466791 | -1.794367 |
| H | -3.134029 | -2.157002 | -0.542343 |
| H | -6.241488 | 0.752934  | -1.371542 |
| H | -6.679676 | -0.801811 | -0.642317 |
| H | -6.132523 | -0.736860 | -2.324261 |

M062X energy = -1154.62376940 a.u.

(1R,5S,6R,7R,8S,10R)-3, Conf. O

|   |           |           |           |
|---|-----------|-----------|-----------|
| C | 2.822357  | -3.176760 | -0.267504 |
| C | 3.832231  | -2.128334 | -0.753261 |
| C | 3.553478  | -0.764932 | -0.166984 |
| C | 2.128005  | -0.313472 | -0.387700 |
| C | 1.128704  | -1.344636 | 0.246351  |
| C | 1.388535  | -2.699684 | -0.459448 |
| C | 1.753769  | 1.056904  | 0.132887  |
| C | 0.329526  | 1.430664  | -0.288343 |
| C | -0.663707 | 0.517717  | 0.388682  |
| C | -0.337273 | -0.927185 | -0.013661 |
| O | 2.550500  | 2.146551  | -0.357410 |
| C | 1.804859  | 3.291701  | -0.298451 |
| C | 0.368280  | 2.910154  | -0.064805 |
| O | 0.545403  | -3.728612 | 0.021744  |
| C | 4.471811  | -0.056661 | 0.487223  |
| C | -0.562856 | 3.793949  | 0.272542  |
| O | 2.275499  | 4.383695  | -0.432902 |
| H | 1.946926  | -0.312924 | -1.476392 |
| C | 1.345622  | -1.504471 | 1.760801  |
| O | -1.972838 | 0.879254  | -0.076445 |
| C | -3.012419 | 0.442948  | 0.669745  |
| O | -2.873062 | -0.208045 | 1.676764  |
| C | -4.334748 | 0.830548  | 0.056493  |
| C | -4.971905 | -0.362203 | -0.691384 |
| C | -4.017924 | -0.929173 | -1.743907 |
| C | -5.436511 | -1.453071 | 0.273011  |
| H | 2.978714  | -3.397287 | 0.794243  |
| H | 2.949741  | -4.117908 | -0.811004 |
| H | 3.762225  | -2.057203 | -1.848933 |

|   |           |           |           |
|---|-----------|-----------|-----------|
| H | 4.853501  | -2.442273 | -0.518770 |
| H | 1.213229  | -2.544082 | -1.539644 |
| H | 1.833138  | 1.067253  | 1.229684  |
| H | 0.259759  | 1.257890  | -1.374590 |
| H | -0.642306 | 0.643042  | 1.476024  |
| H | -0.561094 | -1.014372 | -1.088086 |
| H | -1.011190 | -1.597626 | 0.531895  |
| H | -0.360618 | -3.540348 | -0.259915 |
| H | 5.476318  | -0.447126 | 0.625833  |
| H | 4.273139  | 0.936888  | 0.875144  |
| H | -1.595962 | 3.503331  | 0.431139  |
| H | -0.290886 | 4.838897  | 0.390713  |
| H | 2.407467  | -1.519572 | 2.019498  |
| H | 0.892337  | -2.445384 | 2.085883  |
| H | 0.878488  | -0.698271 | 2.333682  |
| H | -4.995773 | 1.152871  | 0.866428  |
| H | -4.178964 | 1.664020  | -0.633355 |
| H | -5.852329 | 0.041454  | -1.206786 |
| H | -4.523011 | -1.682178 | -2.356042 |
| H | -3.632521 | -0.146732 | -2.405407 |
| H | -3.158957 | -1.414497 | -1.263914 |
| H | -6.156089 | -1.060763 | 0.998317  |
| H | -4.591484 | -1.864956 | 0.832925  |
| H | -5.916820 | -2.268905 | -0.276305 |

M062X energy = -1154.62371086 a.u.

(1R,5S,6R,7R,8S,10R)-3, Conf. P

|   |           |           |           |
|---|-----------|-----------|-----------|
| C | 3.031609  | -3.072585 | -0.323942 |
| C | 3.978271  | -1.974572 | -0.829811 |
| C | 3.647293  | -0.629733 | -0.228124 |
| C | 2.197241  | -0.249241 | -0.416139 |
| C | 1.260589  | -1.320218 | 0.246991  |
| C | 1.563790  | -2.667703 | -0.454476 |
| C | 1.770990  | 1.108830  | 0.097128  |
| C | 0.318241  | 1.407464  | -0.285122 |
| C | -0.609192 | 0.451217  | 0.427036  |
| C | -0.227702 | -0.976937 | 0.016809  |
| O | 2.500490  | 2.227614  | -0.430058 |
| C | 1.702028  | 3.336853  | -0.360149 |
| C | 0.293237  | 2.889811  | -0.078833 |
| O | 0.701487  | -3.702201 | -0.021334 |
| C | 4.544564  | 0.119213  | 0.409719  |
| C | -0.669664 | 3.731981  | 0.275578  |
| O | 2.116595  | 4.448033  | -0.519984 |
| H | 1.988815  | -0.270162 | -1.499493 |
| C | 1.522006  | -1.445373 | 1.757475  |
| O | -1.948193 | 0.743943  | -0.001320 |
| C | -2.937972 | 0.256861  | 0.777384  |
| O | -2.739043 | -0.366211 | 1.791217  |
| C | -4.303148 | 0.542470  | 0.203413  |
| C | -4.998778 | -0.774102 | -0.182332 |
| C | -6.411182 | -0.491461 | -0.688947 |
| C | -4.180519 | -1.533754 | -1.226889 |
| H | 3.251512  | -3.289439 | 0.730697  |
| H | 3.186642  | -4.002325 | -0.880737 |
| H | 3.872859  | -1.903467 | -1.922260 |

|   |           |           |           |
|---|-----------|-----------|-----------|
| H | 5.019558  | -2.240496 | -0.625746 |
| H | 1.329713  | -2.536125 | -1.520457 |
| H | 1.881685  | 1.141801  | 1.190452  |
| H | 0.226252  | 1.219735  | -1.367171 |
| H | -0.562924 | 0.586591  | 1.512628  |
| H | -0.462115 | -1.075802 | -1.052942 |
| H | -0.849355 | -1.698583 | 0.554066  |
| H | 1.038633  | -4.039814 | 0.821016  |
| H | 5.570135  | -0.221156 | 0.524342  |
| H | 4.305658  | 1.101009  | 0.805092  |
| H | -1.682208 | 3.392761  | 0.466759  |
| H | -0.446315 | 4.790465  | 0.373498  |
| H | 1.127153  | -0.594574 | 2.318869  |
| H | 2.588024  | -1.520713 | 1.987111  |
| H | 1.010265  | -2.331105 | 2.149129  |
| H | -4.888043 | 1.057675  | 0.972807  |
| H | -4.213195 | 1.197614  | -0.668454 |
| H | -5.058753 | -1.383998 | 0.727448  |
| H | -6.379003 | 0.122855  | -1.596482 |
| H | -6.930423 | -1.422956 | -0.934192 |
| H | -7.005822 | 0.042054  | 0.059455  |
| H | -3.188030 | -1.801257 | -0.848215 |
| H | -4.046322 | -0.924162 | -2.128484 |
| H | -4.685310 | -2.459972 | -1.517542 |

M062X energy = -1154.62368704 a.u.

(1R,5S,6R,7R,8S,10R)-3, Conf. Q

|   |           |           |           |
|---|-----------|-----------|-----------|
| C | 2.817949  | -3.173876 | -0.295314 |
| C | 3.832160  | -2.118555 | -0.759138 |
| C | 3.548126  | -0.765629 | -0.151886 |
| C | 2.125220  | -0.312429 | -0.381497 |
| C | 1.116152  | -1.342755 | 0.238543  |
| C | 1.376335  | -2.696912 | -0.467570 |
| C | 1.749430  | 1.060180  | 0.133041  |
| C | 0.326266  | 1.433906  | -0.291422 |
| C | -0.668655 | 0.516682  | 0.379898  |
| C | -0.344456 | -0.923456 | -0.037718 |
| O | 2.549653  | 2.146476  | -0.358383 |
| C | 1.804845  | 3.293112  | -0.300852 |
| C | 0.367642  | 2.913438  | -0.067963 |
| O | 0.451665  | -3.692198 | -0.072669 |
| C | 4.459748  | -0.068769 | 0.523474  |
| C | -0.562698 | 3.798651  | 0.267997  |
| O | 2.278194  | 4.383955  | -0.435441 |
| H | 1.951485  | -0.312384 | -1.471174 |
| C | 1.320482  | -1.495312 | 1.755265  |
| O | -1.977806 | 0.882003  | -0.081595 |
| C | -3.014641 | 0.453736  | 0.673344  |
| O | -2.871876 | -0.176515 | 1.692905  |
| C | -4.339274 | 0.824622  | 0.055028  |
| C | -4.963361 | -0.377427 | -0.689049 |
| C | -4.009711 | -0.930041 | -1.749495 |
| C | -5.403347 | -1.475647 | 0.278593  |
| H | 2.993338  | -3.410743 | 0.763343  |
| H | 2.945509  | -4.104926 | -0.856878 |
| H | 3.764523  | -2.031154 | -1.853386 |

|   |           |           |           |
|---|-----------|-----------|-----------|
| H | 4.852341  | -2.437356 | -0.526264 |
| H | 1.183068  | -2.544453 | -1.538970 |
| H | 1.826272  | 1.077328  | 1.229670  |
| H | 0.260112  | 1.262581  | -1.378104 |
| H | -0.647679 | 0.636544  | 1.468053  |
| H | -0.544202 | -0.996575 | -1.116521 |
| H | -1.020466 | -1.620159 | 0.466183  |
| H | 0.746010  | -4.054276 | 0.775541  |
| H | 5.463224  | -0.460415 | 0.666393  |
| H | 4.256483  | 0.919218  | 0.923310  |
| H | -1.596098 | 3.508498  | 0.425410  |
| H | -0.290115 | 4.843514  | 0.385631  |
| H | 2.373284  | -1.625680 | 2.018835  |
| H | 0.752894  | -2.358275 | 2.119843  |
| H | 0.949747  | -0.631470 | 2.313097  |
| H | -5.005029 | 1.143911  | 0.862305  |
| H | -4.190569 | 1.656224  | -0.638788 |
| H | -5.854317 | 0.013870  | -1.196159 |
| H | -3.640616 | -0.140708 | -2.412280 |
| H | -3.141309 | -1.407514 | -1.279764 |
| H | -4.510948 | -1.687165 | -2.359742 |
| H | -5.879830 | -2.295901 | -0.267382 |
| H | -6.118720 | -1.093837 | 1.013806  |
| H | -4.546304 | -1.879597 | 0.825790  |

M062X energy = -1154.62347176 a.u.

(1R,5S,6R,7R,8S,10R)-3, Conf. R

|   |           |           |           |
|---|-----------|-----------|-----------|
| C | 3.410925  | -2.886684 | -0.196640 |
| C | 4.327898  | -1.692156 | -0.491533 |
| C | 3.784902  | -0.409500 | 0.091689  |
| C | 2.357939  | -0.135734 | -0.324505 |
| C | 1.427118  | -1.319454 | 0.118039  |
| C | 1.967977  | -2.590616 | -0.584671 |
| C | 1.729911  | 1.144652  | 0.180106  |
| C | 0.344315  | 1.352469  | -0.438070 |
| C | -0.604139 | 0.284221  | 0.049855  |
| C | -0.029749 | -1.083700 | -0.344137 |
| O | 2.433307  | 2.353126  | -0.147567 |
| C | 1.538239  | 3.387033  | -0.163101 |
| C | 0.148395  | 2.810463  | -0.162085 |
| O | 1.213136  | -3.744264 | -0.268079 |
| C | 4.494710  | 0.376349  | 0.898924  |
| C | -0.933505 | 3.546666  | 0.059850  |
| O | 1.870174  | 4.536479  | -0.187994 |
| H | 2.337148  | -0.100590 | -1.427389 |
| C | 1.443752  | -1.529175 | 1.641981  |
| O | -1.867355 | 0.502128  | -0.597196 |
| C | -2.940272 | -0.101665 | -0.038927 |
| O | -2.859141 | -0.804302 | 0.938745  |
| C | -4.194505 | 0.245595  | -0.810400 |
| C | -5.485957 | -0.399046 | -0.296084 |
| C | -5.441509 | -1.925885 | -0.387145 |
| C | -5.839378 | 0.068394  | 1.117421  |
| H | 3.441737  | -3.140144 | 0.868813  |
| H | 3.741943  | -3.773651 | -0.745330 |
| H | 4.406578  | -1.572822 | -1.582423 |

|   |           |           |           |
|---|-----------|-----------|-----------|
| H | 5.338165  | -1.882886 | -0.117999 |
| H | 1.929804  | -2.402949 | -1.673289 |
| H | 1.647866  | 1.106423  | 1.276077  |
| H | 0.457047  | 1.230119  | -1.527514 |
| H | -0.758686 | 0.354548  | 1.131492  |
| H | -0.084053 | -1.145260 | -1.441709 |
| H | -0.676242 | -1.862859 | 0.074094  |
| H | 0.339080  | -3.660780 | -0.673876 |
| H | 5.512680  | 0.112840  | 1.172813  |
| H | 4.108870  | 1.313688  | 1.285762  |
| H | -1.929175 | 3.115845  | 0.050131  |
| H | -0.827342 | 4.610309  | 0.252708  |
| H | 0.792764  | -0.822326 | 2.164452  |
| H | 2.449121  | -1.418747 | 2.056373  |
| H | 1.081867  | -2.537138 | 1.864504  |
| H | -4.279140 | 1.339948  | -0.804581 |
| H | -4.010400 | -0.031081 | -1.855907 |
| H | -6.276526 | -0.046924 | -0.972069 |
| H | -5.204009 | -2.255505 | -1.404691 |
| H | -4.689258 | -2.332242 | 0.293572  |
| H | -6.412564 | -2.351528 | -0.116121 |
| H | -5.095506 | -0.280362 | 1.837899  |
| H | -6.815721 | -0.326080 | 1.415434  |
| H | -5.889440 | 1.161459  | 1.172107  |

M062X energy = -1154.62337936 a.u.

(1R,5S,6R,7R,8S,10R)-3, Conf. S

|   |           |           |           |
|---|-----------|-----------|-----------|
| C | 3.441642  | -2.856674 | -0.190187 |
| C | 4.349364  | -1.655661 | -0.490133 |
| C | 3.790308  | -0.380829 | 0.095283  |
| C | 2.361282  | -0.122749 | -0.323328 |
| C | 1.436988  | -1.315256 | 0.112949  |
| C | 1.992039  | -2.574055 | -0.583000 |
| C | 1.718306  | 1.150300  | 0.181195  |
| C | 0.332925  | 1.344787  | -0.441485 |
| C | -0.605683 | 0.263436  | 0.038715  |
| C | -0.018198 | -1.096305 | -0.361366 |
| O | 2.411872  | 2.365863  | -0.142358 |
| C | 1.506221  | 3.390848  | -0.159907 |
| C | 0.122479  | 2.800405  | -0.163700 |
| O | 1.141960  | -3.656681 | -0.252821 |
| C | 4.491507  | 0.409671  | 0.905417  |
| C | -0.967367 | 3.525372  | 0.056603  |
| O | 1.827941  | 4.543451  | -0.182625 |
| H | 2.342592  | -0.085526 | -1.425830 |
| C | 1.448123  | -1.520123 | 1.638892  |
| O | -1.868167 | 0.468439  | -0.614751 |
| C | -2.941491 | -0.123649 | -0.045417 |
| O | -2.868620 | -0.782816 | 0.962298  |
| C | -4.187961 | 0.175799  | -0.849630 |
| C | -5.485915 | -0.430674 | -0.306457 |
| C | -5.449459 | -1.960459 | -0.305795 |
| C | -5.844622 | 0.122112  | 1.074563  |
| H | 3.474950  | -3.105616 | 0.876184  |
| H | 3.798371  | -3.739283 | -0.737266 |
| H | 4.423009  | -1.536642 | -1.581306 |

|   |           |           |           |
|---|-----------|-----------|-----------|
| H | 5.362291  | -1.836136 | -0.118793 |
| H | 1.953084  | -2.386817 | -1.671821 |
| H | 1.633072  | 1.110714  | 1.276659  |
| H | 0.451622  | 1.226513  | -1.530756 |
| H | -0.767404 | 0.331218  | 1.119405  |
| H | -0.055466 | -1.150981 | -1.458747 |
| H | -0.646331 | -1.901216 | 0.029267  |
| H | 1.514256  | -4.460597 | -0.641182 |
| H | 5.512115  | 0.156652  | 1.179577  |
| H | 4.094722  | 1.341643  | 1.294034  |
| H | -1.958259 | 3.083731  | 0.043714  |
| H | -0.873034 | 4.589796  | 0.251328  |
| H | 2.453649  | -1.421471 | 2.056638  |
| H | 1.065899  | -2.518411 | 1.867424  |
| H | 0.807372  | -0.798963 | 2.153687  |
| H | -4.269436 | 1.268112  | -0.918551 |
| H | -3.994696 | -0.171829 | -1.872146 |
| H | -6.270843 | -0.115314 | -1.006908 |
| H | -5.210221 | -2.351244 | -1.300944 |
| H | -4.700650 | -2.329040 | 0.399511  |
| H | -6.423857 | -2.363909 | -0.013132 |
| H | -5.106364 | -0.187457 | 1.818392  |
| H | -6.824778 | -0.248605 | 1.390305  |
| H | -5.888502 | 1.216849  | 1.064043  |

M062X energy = -1154.62337150 a.u.

(1R,5S,6R,7R,8S,10R)-3, Conf. T

|   |           |           |           |
|---|-----------|-----------|-----------|
| C | 3.998811  | -2.252054 | -0.163840 |
| C | 4.621099  | -0.872623 | -0.418163 |
| C | 3.776676  | 0.239388  | 0.156845  |
| C | 2.338588  | 0.179881  | -0.304489 |
| C | 1.696109  | -1.193789 | 0.097287  |
| C | 2.538927  | -2.293712 | -0.596937 |
| C | 1.414652  | 1.270647  | 0.189457  |
| C | 0.036301  | 1.162183  | -0.470727 |
| C | -0.652555 | -0.105911 | -0.025993 |
| C | 0.239818  | -1.294870 | -0.412308 |
| O | 1.829300  | 2.613312  | -0.106864 |
| C | 0.720720  | 3.413107  | -0.142618 |
| C | -0.497412 | 2.531690  | -0.186724 |
| O | 2.064798  | -3.596057 | -0.314281 |
| C | 4.258870  | 1.155762  | 0.993962  |
| C | -1.724766 | 2.994514  | 0.015242  |
| O | 0.778941  | 4.608408  | -0.149161 |
| H | 2.343402  | 0.226462  | -1.407144 |
| C | 1.713393  | -1.417821 | 1.619059  |
| O | -1.909540 | -0.183142 | -0.718938 |
| C | -2.801193 | -1.075412 | -0.235124 |
| O | -2.584019 | -1.759715 | 0.735946  |
| C | -4.081572 | -1.082346 | -1.036564 |
| C | -5.283489 | -0.575011 | -0.212810 |
| C | -5.671009 | -1.539440 | 0.908147  |
| C | -5.014994 | 0.827312  | 0.333334  |
| H | 4.055523  | -2.508369 | 0.899859  |
| H | 4.543775  | -3.028922 | -0.708723 |
| H | 4.703378  | -0.721319 | -1.504802 |

|   |           |           |           |
|---|-----------|-----------|-----------|
| H | 5.636047  | -0.829241 | -0.012504 |
| H | 2.491048  | -2.103645 | -1.684778 |
| H | 1.311758  | 1.198414  | 1.281956  |
| H | 0.206231  | 1.087780  | -1.557091 |
| H | -0.857180 | -0.092917 | 1.049737  |
| H | 0.236433  | -1.347163 | -1.511737 |
| H | -0.218867 | -2.210662 | -0.024941 |
| H | 1.205233  | -3.710183 | -0.742959 |
| H | 5.301299  | 1.131589  | 1.299696  |
| H | 3.653786  | 1.971623  | 1.375203  |
| H | -2.592460 | 2.344864  | -0.023078 |
| H | -1.871098 | 4.050778  | 0.222222  |
| H | 2.653242  | -1.086218 | 2.067923  |
| H | 1.586161  | -2.485253 | 1.821099  |
| H | 0.901413  | -0.887396 | 2.124815  |
| H | -3.945352 | -0.464715 | -1.927747 |
| H | -4.263876 | -2.115403 | -1.351561 |
| H | -6.123147 | -0.513251 | -0.916630 |
| H | -6.569095 | -1.181212 | 1.421175  |
| H | -5.880795 | -2.538949 | 0.513997  |
| H | -4.866072 | -1.631889 | 1.641779  |
| H | -4.189049 | 0.808414  | 1.056193  |
| H | -5.894779 | 1.219703  | 0.851850  |
| H | -4.754655 | 1.525659  | -0.469649 |

M062X energy = -1154.62324597 a.u.

(1R,5S,6R,7R,8S,10R)-3, Conf. U

|   |           |           |           |
|---|-----------|-----------|-----------|
| C | 4.007396  | -2.239951 | -0.165000 |
| C | 4.628500  | -0.860951 | -0.427742 |
| C | 3.780791  | 0.246307  | 0.151808  |
| C | 2.341945  | 0.181434  | -0.306037 |
| C | 1.699658  | -1.194346 | 0.093472  |
| C | 2.542112  | -2.285342 | -0.597053 |
| C | 1.415298  | 1.269119  | 0.189989  |
| C | 0.036808  | 1.156954  | -0.468703 |
| C | -0.646115 | -0.115649 | -0.025945 |
| C | 0.245831  | -1.300882 | -0.421129 |
| O | 1.827076  | 2.613100  | -0.105668 |
| C | 0.715801  | 3.409794  | -0.139719 |
| C | -0.499625 | 2.524899  | -0.182411 |
| O | 1.950013  | -3.536514 | -0.301131 |
| C | 4.263757  | 1.162105  | 0.989034  |
| C | -1.728084 | 2.983596  | 0.022616  |
| O | 0.771847  | 4.605399  | -0.145712 |
| H | 2.344104  | 0.229430  | -1.408293 |
| C | 1.715972  | -1.414402 | 1.617122  |
| O | -1.903668 | -0.196910 | -0.717781 |
| C | -2.804928 | -1.065372 | -0.209621 |
| O | -2.606101 | -1.709052 | 0.792189  |
| C | -4.073469 | -1.100216 | -1.030052 |
| C | -5.293884 | -0.590426 | -0.236649 |
| C | -5.697674 | -1.542807 | 0.888975  |
| C | -5.043988 | 0.820262  | 0.296998  |
| H | 4.068097  | -2.491323 | 0.899591  |
| H | 4.568224  | -3.011046 | -0.709537 |
| H | 4.702582  | -0.712184 | -1.515209 |

|   |           |           |           |
|---|-----------|-----------|-----------|
| H | 5.645738  | -0.814329 | -0.028296 |
| H | 2.490484  | -2.095455 | -1.684898 |
| H | 1.313660  | 1.196805  | 1.282406  |
| H | 0.206091  | 1.085179  | -1.555339 |
| H | -0.850546 | -0.103616 | 1.049728  |
| H | 0.251355  | -1.343602 | -1.519699 |
| H | -0.193585 | -2.233272 | -0.057815 |
| H | 2.506373  | -4.230099 | -0.682064 |
| H | 5.307436  | 1.141185  | 1.290906  |
| H | 3.656858  | 1.974938  | 1.373734  |
| H | -2.593250 | 2.330396  | -0.014492 |
| H | -1.878146 | 4.039109  | 0.230794  |
| H | 0.917001  | -0.861786 | 2.119083  |
| H | 2.662791  | -1.100633 | 2.064865  |
| H | 1.559906  | -2.476001 | 1.825643  |
| H | -3.928517 | -0.498750 | -1.930862 |
| H | -4.239060 | -2.140836 | -1.329491 |
| H | -6.120625 | -0.542206 | -0.956786 |
| H | -5.897528 | -2.547408 | 0.502549  |
| H | -4.904327 | -1.624046 | 1.636282  |
| H | -6.605639 | -1.181844 | 1.382560  |
| H | -5.936288 | 1.215017  | 0.791958  |
| H | -4.769865 | 1.509686  | -0.509208 |
| H | -4.233281 | 0.813755  | 1.037000  |

M062X energy = -1154.62316939 a.u.

(1R,5S,6R,7R,8S,10R)-3, Conf. V

|   |           |           |           |
|---|-----------|-----------|-----------|
| C | 3.436451  | -2.864412 | -0.223917 |
| C | 4.345476  | -1.656076 | -0.490174 |
| C | 3.783890  | -0.390864 | 0.112881  |
| C | 2.359942  | -0.124654 | -0.316219 |
| C | 1.429202  | -1.315940 | 0.106322  |
| C | 1.982067  | -2.580480 | -0.597669 |
| C | 1.719785  | 1.152669  | 0.181836  |
| C | 0.335948  | 1.351179  | -0.443192 |
| C | -0.605701 | 0.270963  | 0.034908  |
| C | -0.020688 | -1.086804 | -0.374665 |
| O | 2.419027  | 2.364087  | -0.142951 |
| C | 1.517026  | 3.392853  | -0.161169 |
| C | 0.130818  | 2.807646  | -0.165497 |
| O | 1.162604  | -3.713431 | -0.382778 |
| C | 4.476811  | 0.385612  | 0.943409  |
| C | -0.956420 | 3.536910  | 0.053522  |
| O | 1.843146  | 4.544059  | -0.183508 |
| H | 2.349953  | -0.087560 | -1.418969 |
| C | 1.429366  | -1.523100 | 1.630359  |
| O | -1.869700 | 0.481796  | -0.612598 |
| C | -2.939616 | -0.120353 | -0.046962 |
| O | -2.860560 | -0.790233 | 0.953455  |
| C | -4.189207 | 0.182513  | -0.844493 |
| C | -5.484933 | -0.426698 | -0.299029 |
| C | -5.449808 | -1.956469 | -0.308049 |
| C | -5.836848 | 0.118033  | 1.086916  |
| H | 3.487200  | -3.133950 | 0.840229  |
| H | 3.777381  | -3.736301 | -0.791395 |
| H | 4.427283  | -1.517737 | -1.578183 |

|   |           |           |           |
|---|-----------|-----------|-----------|
| H | 5.355576  | -1.844756 | -0.115010 |
| H | 1.927684  | -2.396597 | -1.680112 |
| H | 1.631323  | 1.118857  | 1.277159  |
| H | 0.456085  | 1.232971  | -1.532281 |
| H | -0.763869 | 0.333735  | 1.116631  |
| H | -0.049459 | -1.129670 | -1.472670 |
| H | -0.655111 | -1.895395 | -0.002076 |
| H | 1.380413  | -4.079855 | 0.486391  |
| H | 5.494295  | 0.127806  | 1.224557  |
| H | 4.077077  | 1.312543  | 1.341317  |
| H | -1.949002 | 3.099135  | 0.039712  |
| H | -0.858087 | 4.601075  | 0.247696  |
| H | 0.862632  | -0.749068 | 2.154459  |
| H | 2.440038  | -1.524765 | 2.046829  |
| H | 0.942649  | -2.473617 | 1.874117  |
| H | -4.271029 | 1.275061  | -0.908384 |
| H | -3.999707 | -0.160810 | -1.869190 |
| H | -6.272756 | -0.106432 | -0.993923 |
| H | -6.423359 | -2.360775 | -0.013798 |
| H | -5.215016 | -2.341427 | -1.306450 |
| H | -4.698447 | -2.330213 | 0.391791  |
| H | -5.879966 | 1.212845  | 1.083318  |
| H | -5.095515 | -0.196595 | 1.825613  |
| H | -6.815780 | -0.253894 | 1.404959  |

M062X energy = -1154.62302830 a.u.

(1R,5S,6R,7R,8S,10R)-3, Conf. W

|   |           |           |           |
|---|-----------|-----------|-----------|
| C | 4.010539  | -2.238708 | -0.196502 |
| C | 4.626391  | -0.851350 | -0.427412 |
| C | 3.774909  | 0.243869  | 0.168674  |
| C | 2.339611  | 0.183906  | -0.299313 |
| C | 1.694853  | -1.193400 | 0.087210  |
| C | 2.540003  | -2.288819 | -0.609873 |
| C | 1.411736  | 1.273907  | 0.190105  |
| C | 0.034281  | 1.162183  | -0.471148 |
| C | -0.648389 | -0.111941 | -0.030804 |
| C | 0.244752  | -1.293090 | -0.434690 |
| O | 1.826237  | 2.616355  | -0.106425 |
| C | 0.715448  | 3.414390  | -0.141104 |
| C | -0.501040 | 2.530640  | -0.184809 |
| O | 1.995623  | -3.581707 | -0.427198 |
| C | 4.249959  | 1.145672  | 1.025377  |
| C | -1.729197 | 2.990741  | 0.018911  |
| O | 0.772688  | 4.609785  | -0.146411 |
| H | 2.350037  | 0.233157  | -1.401594 |
| C | 1.700723  | -1.416613 | 1.608915  |
| O | -1.908217 | -0.192144 | -0.717618 |
| C | -2.801178 | -1.072093 | -0.214127 |
| O | -2.592321 | -1.723942 | 0.780605  |
| C | -4.073618 | -1.107602 | -1.027788 |
| C | -5.288860 | -0.594325 | -0.228405 |
| C | -5.685196 | -1.542430 | 0.903410  |
| C | -5.035351 | 0.818323  | 0.298273  |
| H | 4.093481  | -2.504374 | 0.866620  |
| H | 4.556335  | -3.001987 | -0.760454 |
| H | 4.703137  | -0.683029 | -1.511552 |

|   |           |           |           |
|---|-----------|-----------|-----------|
| H | 5.642643  | -0.809991 | -0.024686 |
| H | 2.473660  | -2.107303 | -1.692061 |
| H | 1.305724  | 1.206035  | 1.282301  |
| H | 0.205436  | 1.091318  | -1.557517 |
| H | -0.849100 | -0.104279 | 1.045812  |
| H | 0.256754  | -1.322407 | -1.533495 |
| H | -0.196722 | -2.231539 | -0.089877 |
| H | 2.268747  | -3.900804 | 0.444994  |
| H | 5.291568  | 1.122351  | 1.334061  |
| H | 3.638815  | 1.951297  | 1.418794  |
| H | -2.595125 | 2.338646  | -0.019437 |
| H | -1.878167 | 4.046459  | 0.226835  |
| H | 0.957349  | -0.800370 | 2.121393  |
| H | 2.672997  | -1.192746 | 2.055535  |
| H | 1.437968  | -2.456576 | 1.830654  |
| H | -3.933040 | -0.508117 | -1.930576 |
| H | -4.241950 | -2.148709 | -1.323593 |
| H | -6.120153 | -0.548812 | -0.943378 |
| H | -5.887317 | -2.548560 | 0.522287  |
| H | -4.887041 | -1.620661 | 1.646001  |
| H | -6.589874 | -1.179666 | 1.401644  |
| H | -4.220569 | 0.814518  | 1.033868  |
| H | -5.924728 | 1.215463  | 0.796545  |
| H | -4.765197 | 1.504347  | -0.512134 |

M062X energy = -1154.62286370 a.u.

(1R,5S,6R,7R,8S,10R)-3, Conf. X

|   |           |           |           |
|---|-----------|-----------|-----------|
| C | 4.229195  | -1.807209 | -0.617651 |
| C | 4.420369  | -0.431439 | -1.271301 |
| C | 3.620553  | 0.634182  | -0.560568 |
| C | 2.158553  | 0.276235  | -0.426137 |
| C | 1.994195  | -1.073551 | 0.362531  |
| C | 2.748634  | -2.146300 | -0.448137 |
| C | 1.258604  | 1.298445  | 0.234831  |
| C | -0.204113 | 0.854317  | 0.150133  |
| C | -0.399156 | -0.385051 | 0.999351  |
| C | 0.505915  | -1.495468 | 0.452013  |
| O | 1.251124  | 2.602307  | -0.368320 |
| C | 0.048200  | 3.198259  | -0.104462 |
| C | -0.892713 | 2.151067  | 0.428527  |
| O | 2.572422  | -3.385833 | 0.214544  |
| C | 4.165461  | 1.757125  | -0.096797 |
| C | -2.048417 | 2.452129  | 1.010007  |
| O | -0.157580 | 4.361667  | -0.295456 |
| H | 1.765751  | 0.105131  | -1.442369 |
| C | 2.593614  | -0.984085 | 1.777695  |
| O | -1.774433 | -0.793367 | 1.124730  |
| C | -2.505196 | -1.041321 | 0.022491  |
| O | -2.079647 | -0.985252 | -1.106606 |
| C | -3.928476 | -1.407385 | 0.381632  |
| C | -4.922328 | -0.974798 | -0.698853 |
| C | -6.311996 | -1.528238 | -0.389140 |
| C | -4.953902 | 0.548976  | -0.822106 |
| H | 4.711405  | -1.835085 | 0.365697  |
| H | 4.708209  | -2.581319 | -1.231430 |
| H | 4.076132  | -0.488869 | -2.314492 |



|   |           |           |           |
|---|-----------|-----------|-----------|
| H | 5.480138  | -0.161795 | -1.298248 |
| H | 2.279089  | -2.186835 | -1.447388 |
| H | 1.557428  | 1.432245  | 1.284798  |
| H | -0.396598 | 0.592692  | -0.898532 |
| H | -0.137131 | -0.150080 | 2.035889  |
| H | 0.145798  | -1.765507 | -0.546778 |
| H | 0.428116  | -2.385189 | 1.083903  |
| H | 3.064115  | -4.059746 | -0.275123 |
| H | 5.228774  | 1.947338  | -0.215285 |
| H | 3.577270  | 2.534146  | 0.380090  |
| H | -2.709636 | 1.684834  | 1.400906  |
| H | -2.346163 | 3.492525  | 1.104434  |
| H | 2.744354  | -1.994711 | 2.166520  |
| H | 1.934277  | -0.456991 | 2.472878  |
| H | 3.552140  | -0.458438 | 1.781402  |
| H | -3.954356 | -2.497370 | 0.513378  |
| H | -4.180533 | -0.965915 | 1.352219  |

|   |           |           |           |
|---|-----------|-----------|-----------|
| H | -4.571755 | -1.391591 | -1.650168 |
| H | -6.678776 | -1.139269 | 0.568285  |
| H | -7.028533 | -1.237002 | -1.163147 |
| H | -6.304870 | -2.621388 | -0.327773 |
| H | -5.648674 | 0.862872  | -1.606997 |
| H | -3.965759 | 0.950779  | -1.067977 |
| H | -5.287297 | 1.003040  | 0.119820  |

M062X energy = -1154.62280309 a.u.

**Table S34.** Cartesian coordinates and energies of the low-energy conformers calculated at the M06-2X/6-31+G(d,p) *in vacuo* level.

|                                    |           |           |           |                                    |           |           |           |
|------------------------------------|-----------|-----------|-----------|------------------------------------|-----------|-----------|-----------|
| (1R,5S,6S,7S,10R)-2, Conf. A       |           |           |           | C                                  | 2.424653  | -1.076651 | -0.443220 |
| C                                  | 3.449478  | 0.031552  | -0.206769 | C                                  | -0.894111 | 0.897548  | -0.070622 |
| C                                  | 2.922906  | 1.396767  | -0.676516 | C                                  | -1.839965 | -0.227295 | -0.499527 |
| C                                  | 1.560507  | 1.660512  | -0.085433 | C                                  | -1.394131 | -1.561605 | 0.108960  |
| C                                  | 0.560399  | 0.570881  | -0.419037 | C                                  | 0.059738  | -1.884297 | -0.243604 |
| C                                  | 1.049755  | -0.776855 | 0.189157  | C                                  | -3.318741 | 0.134079  | -0.236407 |
| C                                  | 2.430340  | -1.075230 | -0.449187 | C                                  | -4.259282 | -0.978176 | -0.708110 |
| C                                  | -0.894122 | 0.896944  | -0.069596 | C                                  | -3.610168 | 0.494201  | 1.223349  |
| C                                  | -1.838648 | -0.230003 | -0.494620 | O                                  | -1.331353 | 2.072820  | -0.741096 |
| C                                  | -1.397273 | -1.555721 | 0.133610  | C                                  | 1.326892  | 2.697790  | 0.727931  |
| C                                  | 0.058354  | -1.883687 | -0.210490 | O                                  | 2.877937  | -2.315782 | 0.082525  |
| C                                  | -3.319136 | 0.132753  | -0.244003 | H                                  | 0.582230  | 0.455426  | -1.520363 |
| C                                  | -4.256729 | -0.984313 | -0.710164 | C                                  | 1.150913  | -0.729880 | 1.709556  |
| C                                  | -3.619097 | 0.508901  | 1.209872  | H                                  | 3.675058  | 0.076978  | 0.871543  |
| O                                  | -1.332027 | 2.068260  | -0.744903 | H                                  | 4.379343  | -0.209000 | -0.719938 |
| C                                  | 1.321757  | 2.703027  | 0.717004  | H                                  | 3.623967  | 2.194902  | -0.412249 |
| O                                  | 3.009749  | -2.274761 | 0.039986  | H                                  | 2.838233  | 1.386340  | -1.774823 |
| H                                  | 0.582673  | 0.446822  | -1.516604 | H                                  | 2.270480  | -1.175753 | -1.532594 |
| C                                  | 1.173655  | -0.715155 | 1.718083  | H                                  | -0.977099 | 1.041296  | 1.019416  |
| H                                  | 3.686853  | 0.064896  | 0.862442  | H                                  | -1.728843 | -0.310357 | -1.593610 |
| H                                  | 4.374120  | -0.226341 | -0.732082 | H                                  | -2.033317 | -2.367217 | -0.266021 |
| H                                  | 3.624395  | 2.190666  | -0.404281 | H                                  | -1.526926 | -1.547328 | 1.198173  |
| H                                  | 2.842235  | 1.390347  | -1.772744 | H                                  | 0.133747  | -2.018943 | -1.333129 |
| H                                  | 2.269289  | -1.163381 | -1.538592 | H                                  | 0.369653  | -2.829885 | 0.212571  |
| H                                  | -0.977428 | 1.043468  | 1.020412  | H                                  | -3.521815 | 1.025411  | -0.840471 |
| H                                  | -1.720935 | -0.325363 | -1.586993 | H                                  | -4.217788 | -1.848865 | -0.044288 |
| H                                  | -2.036092 | -2.367052 | -0.229274 | H                                  | -5.294777 | -0.624190 | -0.718144 |
| H                                  | -1.528949 | -1.523437 | 1.222322  | H                                  | -4.008032 | -1.312888 | -1.720922 |
| H                                  | 0.130555  | -2.045702 | -1.297288 | H                                  | -4.679693 | 0.686364  | 1.356496  |
| H                                  | 0.342463  | -2.824734 | 0.278945  | H                                  | -3.074422 | 1.396222  | 1.532455  |
| H                                  | -3.517731 | 1.017604  | -0.858792 | H                                  | -3.337603 | -0.321000 | 1.903967  |
| H                                  | -4.220831 | -1.847928 | -0.036711 | H                                  | -0.642399 | 2.744685  | -0.672261 |
| H                                  | -5.291896 | -0.630118 | -0.730859 | H                                  | 0.368121  | 2.854340  | 1.216233  |
| H                                  | -3.999341 | -1.329746 | -1.717848 | H                                  | 2.110407  | 3.416289  | 0.951587  |
| H                                  | -4.688780 | 0.706038  | 1.333460  | H                                  | 3.725341  | -2.537651 | -0.318305 |
| H                                  | -3.082259 | 1.412257  | 1.512850  | H                                  | 1.777743  | 0.097201  | 2.051726  |
| H                                  | -3.354543 | -0.299930 | 1.901212  | H                                  | 0.169320  | -0.601560 | 2.173011  |
| H                                  | -0.640895 | 2.738846  | -0.684221 | H                                  | 1.582108  | -1.666012 | 2.073959  |
| H                                  | 0.361438  | 2.862606  | 1.201385  | M062X energy = -737.415322472 a.u. |           |           |           |
| H                                  | 2.103929  | 3.423778  | 0.937807  | (1R,5S,6S,7S,10R)-2, Conf. C       |           |           |           |
| H                                  | 2.488279  | -3.026582 | -0.262117 | C                                  | 3.448808  | 0.035836  | -0.229759 |
| H                                  | 1.657983  | -1.626105 | 2.081602  | C                                  | 2.916785  | 1.404485  | -0.684723 |
| H                                  | 1.766461  | 0.141446  | 2.046704  | C                                  | 1.561338  | 1.657017  | -0.074018 |
| H                                  | 0.194355  | -0.632573 | 2.197135  | C                                  | 0.560612  | 0.573488  | -0.421164 |
| M062X energy = -737.415546252 a.u. |           |           |           | C                                  | 1.042993  | -0.784135 | 0.168680  |
| (1R,5S,6S,7S,10R)-2, Conf. B       |           |           |           | C                                  | 2.429865  | -1.083146 | -0.453360 |
| C                                  | 3.444899  | 0.036136  | -0.198893 | C                                  | -0.895031 | 0.899159  | -0.072399 |
| C                                  | 2.921643  | 1.399814  | -0.678989 | C                                  | -1.842687 | -0.224832 | -0.499220 |
| C                                  | 1.560650  | 1.661036  | -0.083267 | C                                  | -1.394608 | -1.560304 | 0.106190  |
| C                                  | 0.560602  | 0.573705  | -0.422436 | C                                  | 0.056133  | -1.881550 | -0.259883 |
| C                                  | 1.043791  | -0.779924 | 0.177702  | C                                  | -3.320466 | 0.136822  | -0.231436 |

|   |           |           |           |
|---|-----------|-----------|-----------|
| C | -4.262927 | -0.972191 | -0.706974 |
| C | -3.609240 | 0.489867  | 1.230602  |
| O | -1.328557 | 2.074554  | -0.744097 |
| C | 1.330308  | 2.682622  | 0.752102  |
| O | 2.949588  | -2.333495 | -0.029605 |
| H | 0.585153  | 0.460191  | -1.519505 |
| C | 1.140931  | -0.738197 | 1.701323  |
| H | 3.705045  | 0.086959  | 0.837482  |
| H | 4.367918  | -0.218876 | -0.766973 |
| H | 3.620925  | 2.197398  | -0.416051 |
| H | 2.822990  | 1.403200  | -1.779544 |
| H | 2.276953  | -1.201645 | -1.535442 |
| H | -0.980903 | 1.045426  | 1.016980  |
| H | -1.734960 | -0.307486 | -1.593560 |
| H | -2.037892 | -2.364737 | -0.264038 |
| H | -1.518288 | -1.546441 | 1.196829  |
| H | 0.122911  | -2.000966 | -1.351236 |
| H | 0.368409  | -2.835492 | 0.177740  |
| H | -3.523571 | 1.031262  | -0.830889 |
| H | -4.221415 | -1.846174 | -0.047493 |
| H | -5.298019 | -0.617071 | -0.713547 |
| H | -4.013791 | -1.302171 | -1.721793 |
| H | -4.678193 | 0.683276  | 1.366139  |
| H | -3.071802 | 1.389329  | 1.544320  |
| H | -3.337741 | -0.329737 | 1.906428  |
| H | -0.642259 | 2.748294  | -0.666089 |
| H | 0.372871  | 2.832781  | 1.245105  |
| H | 2.113545  | 3.400036  | 0.980230  |
| H | 3.283629  | -2.242276 | 0.870888  |
| H | 1.848850  | 0.018062  | 2.050464  |
| H | 0.176594  | -0.504774 | 2.159447  |
| H | 1.447900  | -1.716488 | 2.087968  |

M062X energy = -737.414986247 a.u.

(1R,5S,6S,7S,10R)-2, Conf. D

|   |           |           |           |
|---|-----------|-----------|-----------|
| C | 3.398438  | 0.440868  | -0.248543 |
| C | 2.652209  | 1.731935  | -0.619692 |
| C | 1.285156  | 1.742322  | 0.017566  |
| C | 0.454111  | 0.533278  | -0.367072 |
| C | 1.165092  | -0.755408 | 0.141784  |
| C | 2.556179  | -0.794712 | -0.540957 |
| C | -1.023391 | 0.614504  | 0.030796  |
| C | -1.802310 | -0.615731 | -0.441821 |
| C | -1.130966 | -1.892163 | 0.079038  |
| C | 0.345211  | -1.975172 | -0.312130 |
| C | -3.307581 | -0.589037 | -0.076018 |
| C | -3.571448 | -0.066247 | 1.339275  |
| C | -4.156863 | 0.179912  | -1.092648 |
| O | -1.640253 | 1.751845  | -0.559276 |
| C | 0.917662  | 2.679943  | 0.897209  |
| O | 3.327736  | -1.916562 | -0.140881 |
| H | 0.462857  | 0.481796  | -1.470585 |
| C | 1.321383  | -0.770018 | 1.668800  |
| H | 3.659263  | 0.446932  | 0.815707  |
| H | 4.335880  | 0.362943  | -0.807593 |
| H | 3.230074  | 2.608540  | -0.312991 |

|   |           |           |           |
|---|-----------|-----------|-----------|
| H | 2.539019  | 1.777556  | -1.712065 |
| H | 2.378953  | -0.841139 | -1.630392 |
| H | -1.095869 | 0.683410  | 1.128963  |
| H | -1.726038 | -0.620984 | -1.541181 |
| H | -1.661608 | -2.761248 | -0.325586 |
| H | -1.239687 | -1.950050 | 1.170023  |
| H | 0.410794  | -2.055832 | -1.408385 |
| H | 0.781999  | -2.890276 | 0.109293  |
| H | -3.639632 | -1.637435 | -0.106050 |
| H | -4.621543 | -0.216636 | 1.607883  |
| H | -2.960535 | -0.578092 | 2.091544  |
| H | -3.362341 | 1.007412  | 1.396045  |
| H | -5.220328 | 0.086064  | -0.847393 |
| H | -4.009391 | -0.213017 | -2.104148 |
| H | -3.889514 | 1.238584  | -1.097897 |
| H | -1.050037 | 2.509486  | -0.463275 |
| H | -0.038484 | 2.656922  | 1.414499  |
| H | 1.587961  | 3.496651  | 1.149590  |
| H | 2.921912  | -2.720710 | -0.483109 |
| H | 1.791646  | 0.142996  | 2.040725  |
| H | 0.354086  | -0.861779 | 2.170248  |
| H | 1.943396  | -1.620004 | 1.963864  |

M062X energy = -737.414579931 a.u.

(1R,5S,6S,7S,10R)-2, Conf. E

|   |           |           |           |
|---|-----------|-----------|-----------|
| C | 3.393999  | 0.443994  | -0.239054 |
| C | 2.651203  | 1.734770  | -0.621026 |
| C | 1.285804  | 1.742571  | 0.020114  |
| C | 0.454430  | 0.536414  | -0.370814 |
| C | 1.159478  | -0.758874 | 0.129843  |
| C | 2.551642  | -0.797623 | -0.534090 |
| C | -1.023138 | 0.615138  | 0.028378  |
| C | -1.803167 | -0.612725 | -0.449520 |
| C | -1.127477 | -1.895745 | 0.051520  |
| C | 0.346033  | -1.973341 | -0.346918 |
| C | -3.306209 | -0.589134 | -0.074383 |
| C | -3.561856 | -0.081041 | 1.347760  |
| C | -4.162792 | 0.189295  | -1.077646 |
| O | -1.639487 | 1.756491  | -0.556292 |
| C | 0.924191  | 2.674231  | 0.908368  |
| O | 3.205280  | -1.980319 | -0.096525 |
| H | 0.462383  | 0.490993  | -1.474307 |
| C | 1.299757  | -0.788654 | 1.659460  |
| H | 3.646183  | 0.456429  | 0.827122  |
| H | 4.339496  | 0.379705  | -0.792776 |
| H | 3.229446  | 2.612962  | -0.319441 |
| H | 2.536928  | 1.773031  | -1.713437 |
| H | 2.383907  | -0.854110 | -1.624465 |
| H | -1.095674 | 0.680691  | 1.126373  |
| H | -1.733739 | -0.606608 | -1.549347 |
| H | -1.659981 | -2.758264 | -0.364814 |
| H | -1.235308 | -1.971219 | 1.141801  |
| H | 0.409764  | -2.025826 | -1.444123 |
| H | 0.807748  | -2.887237 | 0.040248  |
| H | -3.637611 | -1.637375 | -0.112562 |
| H | -4.609512 | -0.237411 | 1.622708  |

|   |           |           |           |
|---|-----------|-----------|-----------|
| H | -2.943485 | -0.598361 | 2.090151  |
| H | -3.356016 | 0.992831  | 1.413883  |
| H | -5.224724 | 0.092470  | -0.826563 |
| H | -4.021529 | -0.193506 | -2.093920 |
| H | -3.896065 | 1.248201  | -1.074322 |
| H | -1.052339 | 2.514923  | -0.449326 |
| H | -0.030064 | 2.648047  | 1.428875  |
| H | 1.596238  | 3.488538  | 1.164107  |
| H | 4.062623  | -2.046524 | -0.530778 |
| H | 0.322644  | -0.832978 | 2.147591  |
| H | 1.871081  | -1.672605 | 1.954785  |
| H | 1.809883  | 0.098168  | 2.043127  |

M062X energy = -737.414383358 a.u.

(1R,5S,6S,7S,10R)-2, Conf. F

|   |           |           |           |
|---|-----------|-----------|-----------|
| C | 3.397064  | 0.445285  | -0.268125 |
| C | 2.646306  | 1.738402  | -0.624509 |
| C | 1.287447  | 1.737824  | 0.029479  |
| C | 0.454615  | 0.535945  | -0.369821 |
| C | 1.158910  | -0.763047 | 0.120170  |
| C | 2.557418  | -0.802856 | -0.544955 |
| C | -1.024331 | 0.616324  | 0.026168  |
| C | -1.806212 | -0.610980 | -0.450111 |
| C | -1.128516 | -1.894595 | 0.048007  |
| C | 0.341361  | -1.970453 | -0.363643 |
| C | -3.308218 | -0.586741 | -0.071141 |
| C | -3.560262 | -0.081489 | 1.352672  |
| C | -4.166130 | 0.194863  | -1.070784 |
| O | -1.636896 | 1.758927  | -0.558983 |
| C | 0.929908  | 2.658339  | 0.930997  |
| O | 3.275071  | -1.980844 | -0.212811 |
| H | 0.465139  | 0.496245  | -1.473456 |
| C | 1.290528  | -0.798836 | 1.650509  |
| H | 3.672090  | 0.471265  | 0.795342  |
| H | 4.329040  | 0.370398  | -0.837367 |
| H | 3.226650  | 2.614305  | -0.320109 |
| H | 2.521031  | 1.787702  | -1.715017 |
| H | 2.394411  | -0.877161 | -1.629452 |
| H | -1.100287 | 0.683211  | 1.123776  |
| H | -1.739758 | -0.605265 | -1.550024 |
| H | -1.664918 | -2.756917 | -0.363432 |
| H | -1.227468 | -1.969203 | 1.139561  |
| H | 0.395692  | -2.008787 | -1.461526 |
| H | 0.805968  | -2.891201 | 0.004329  |
| H | -3.640699 | -1.634537 | -0.110920 |
| H | -4.607284 | -0.238024 | 1.629740  |
| H | -2.940637 | -0.600809 | 2.092746  |
| H | -3.354091 | 0.992222  | 1.420791  |
| H | -5.227519 | 0.099090  | -0.817201 |
| H | -4.027995 | -0.186252 | -2.088058 |
| H | -3.897955 | 1.253399  | -1.066227 |
| H | -1.051530 | 2.517641  | -0.443580 |
| H | -0.022551 | 2.626209  | 1.454544  |
| H | 1.601918  | 3.471164  | 1.191558  |

|   |          |           |          |
|---|----------|-----------|----------|
| H | 3.613994 | -1.895491 | 0.686439 |
| H | 0.314797 | -0.742055 | 2.139670 |
| H | 1.750243 | -1.741896 | 1.966770 |
| H | 1.886990 | 0.032169  | 2.035990 |

M062X energy = -737.414038468 a.u.

(1R,5S,6S,7S,10R)-2, Conf. G

|   |           |           |           |
|---|-----------|-----------|-----------|
| C | 3.454482  | 0.009433  | -0.133890 |
| C | 2.958711  | 1.372836  | -0.633024 |
| C | 1.576635  | 1.674236  | -0.102400 |
| C | 0.567548  | 0.589226  | -0.429439 |
| C | 1.038727  | -0.773974 | 0.167199  |
| C | 2.428639  | -1.081822 | -0.426800 |
| C | -0.887854 | 0.897655  | -0.054355 |
| C | -1.837747 | -0.222425 | -0.508114 |
| C | -1.393659 | -1.573135 | 0.064245  |
| C | 0.065244  | -1.879259 | -0.275167 |
| C | -3.315792 | 0.128869  | -0.227077 |
| C | -4.257144 | -0.982219 | -0.699739 |
| C | -3.591299 | 0.474935  | 1.239377  |
| O | -1.318868 | 2.148888  | -0.575842 |
| C | 1.321941  | 2.767300  | 0.619834  |
| O | 2.846799  | -2.341243 | 0.080416  |
| H | 0.585199  | 0.457770  | -1.529660 |
| C | 1.121817  | -0.724188 | 1.701093  |
| H | 3.642207  | 0.043410  | 0.945094  |
| H | 4.405424  | -0.245382 | -0.619966 |
| H | 3.658154  | 2.164520  | -0.349088 |
| H | 2.920774  | 1.352638  | -1.732487 |
| H | 2.300402  | -1.155085 | -1.522112 |
| H | -0.955616 | 1.012267  | 1.035314  |
| H | -1.734617 | -0.288389 | -1.606865 |
| H | -2.024505 | -2.371243 | -0.340120 |
| H | -1.542037 | -1.587931 | 1.151271  |
| H | 0.154180  | -2.003003 | -1.365155 |
| H | 0.376333  | -2.827521 | 0.174275  |
| H | -3.533068 | 1.027126  | -0.816059 |
| H | -4.016336 | -1.306925 | -1.718542 |
| H | -4.204264 | -1.859159 | -0.045227 |
| H | -5.294044 | -0.632408 | -0.694285 |
| H | -4.662054 | 0.645905  | 1.389926  |
| H | -3.067790 | 1.385102  | 1.544729  |
| H | -3.293239 | -0.338921 | 1.910713  |
| H | -1.032693 | 2.221003  | -1.494694 |
| H | 0.327650  | 2.999582  | 0.984151  |
| H | 2.116060  | 3.475774  | 0.841665  |
| H | 3.724134  | -2.541840 | -0.263191 |
| H | 1.681476  | 0.146787  | 2.051531  |
| H | 0.128719  | -0.671259 | 2.154325  |
| H | 1.614612  | -1.628785 | 2.067408  |

M062X energy = -737.412562968 a.u.

**Table S35.** Cartesian coordinates and energies of the low-energy conformers calculated at the M06-2X/6-311+G(2d,p) *in vacuo* level.

|                                    |           |           |           |                                    |           |           |           |
|------------------------------------|-----------|-----------|-----------|------------------------------------|-----------|-----------|-----------|
| (1R,5S,6S,7S,10R)-2, Conf. A       |           |           |           | C                                  | 2.420847  | -1.073254 | -0.441163 |
| C                                  | 3.443735  | 0.030398  | -0.199487 | C                                  | -0.893072 | 0.895516  | -0.072481 |
| C                                  | 2.919660  | 1.394207  | -0.668516 | C                                  | -1.836311 | -0.227644 | -0.502228 |
| C                                  | 1.557040  | 1.658773  | -0.085097 | C                                  | -1.391925 | -1.560399 | 0.104402  |
| C                                  | 0.559397  | 0.570952  | -0.419493 | C                                  | 0.060572  | -1.880977 | -0.245492 |
| C                                  | 1.047387  | -0.774479 | 0.189177  | C                                  | -3.313204 | 0.131333  | -0.237568 |
| C                                  | 2.426052  | -1.072347 | -0.446448 | C                                  | -4.250903 | -0.986282 | -0.694594 |
| C                                  | -0.892581 | 0.895732  | -0.071786 | C                                  | -3.600469 | 0.503308  | 1.217672  |
| C                                  | -1.834383 | -0.229857 | -0.497379 | O                                  | -1.329793 | 2.071366  | -0.741623 |
| C                                  | -1.394423 | -1.554129 | 0.128852  | C                                  | 1.320516  | 2.691904  | 0.721045  |
| C                                  | 0.059827  | -1.880344 | -0.212310 | O                                  | 2.875491  | -2.314614 | 0.077182  |
| C                                  | -3.312954 | 0.130482  | -0.244923 | H                                  | 0.583541  | 0.454598  | -1.516789 |
| C                                  | -4.247918 | -0.991611 | -0.696499 | C                                  | 1.145208  | -0.728164 | 1.707693  |
| C                                  | -3.608486 | 0.517869  | 1.204507  | H                                  | 3.666363  | 0.075245  | 0.875144  |
| O                                  | -1.330091 | 2.067575  | -0.745846 | H                                  | 4.370909  | -0.208265 | -0.711878 |
| C                                  | 1.316731  | 2.697985  | 0.709378  | H                                  | 3.615451  | 2.191529  | -0.403011 |
| O                                  | 3.003059  | -2.275068 | 0.036642  | H                                  | 2.836380  | 1.384419  | -1.764576 |
| H                                  | 0.584338  | 0.446944  | -1.513346 | H                                  | 2.268245  | -1.167523 | -1.527181 |
| C                                  | 1.167693  | -0.712976 | 1.716226  | H                                  | -0.976582 | 1.037240  | 1.013545  |
| H                                  | 3.677672  | 0.061940  | 0.867334  | H                                  | -1.726241 | -0.310148 | -1.592787 |
| H                                  | 4.366983  | -0.225983 | -0.721713 | H                                  | -2.027383 | -2.363178 | -0.273585 |
| H                                  | 3.617642  | 2.186008  | -0.394164 | H                                  | -1.527361 | -1.548325 | 1.189737  |
| H                                  | 2.842146  | 1.387461  | -1.761824 | H                                  | 0.135991  | -2.013395 | -1.331686 |
| H                                  | 2.267263  | -1.155955 | -1.532482 | H                                  | 0.368127  | -2.824540 | 0.208997  |
| H                                  | -0.976390 | 1.040406  | 1.014209  | H                                  | -3.522224 | 1.013624  | -0.846943 |
| H                                  | -1.717919 | -0.324463 | -1.586298 | H                                  | -4.001208 | -1.330512 | -1.701410 |
| H                                  | -2.029855 | -2.362419 | -0.237097 | H                                  | -4.205284 | -1.846458 | -0.022479 |
| H                                  | -1.529138 | -1.524098 | 1.213721  | H                                  | -5.284258 | -0.635032 | -0.705772 |
| H                                  | 0.133631  | -2.040930 | -1.295735 | H                                  | -4.669094 | 0.681536  | 1.353997  |
| H                                  | 0.343175  | -2.818263 | 0.276116  | H                                  | -3.076642 | 1.413683  | 1.511816  |
| H                                  | -3.517563 | 1.006463  | -0.864650 | H                                  | -3.313861 | -0.298672 | 1.903274  |
| H                                  | -4.207881 | -1.844820 | -0.015095 | H                                  | -0.636935 | 2.736259  | -0.677247 |
| H                                  | -5.280938 | -0.640109 | -0.718052 | H                                  | 0.360599  | 2.850414  | 1.200040  |
| H                                  | -3.992259 | -1.346205 | -1.698244 | H                                  | 2.101313  | 3.409229  | 0.945093  |
| H                                  | -4.677281 | 0.701459  | 1.331528  | H                                  | 3.741180  | -2.506520 | -0.293749 |
| H                                  | -3.083044 | 1.429106  | 1.492807  | H                                  | 1.767124  | 0.098505  | 2.050184  |
| H                                  | -3.330109 | -0.278193 | 1.900370  | H                                  | 0.164736  | -0.604044 | 2.167357  |
| H                                  | -0.634444 | 2.730609  | -0.691113 | H                                  | 1.576940  | -1.660546 | 2.072580  |
| H                                  | 0.355083  | 2.860363  | 1.183679  | M062X energy = -737.598564608 a.u. |           |           |           |
| H                                  | 2.096622  | 3.417023  | 0.930832  | (1R,5S,6S,7S,10R)-2, Conf. C       |           |           |           |
| H                                  | 2.470525  | -3.018103 | -0.260666 | C                                  | 3.443030  | 0.036375  | -0.225105 |
| H                                  | 1.650477  | -1.621419 | 2.079448  | C                                  | 2.911867  | 1.403165  | -0.678642 |
| H                                  | 1.757106  | 0.141913  | 2.045494  | C                                  | 1.556857  | 1.655253  | -0.073595 |
| H                                  | 0.189746  | -0.632713 | 2.191349  | C                                  | 0.558965  | 0.573201  | -0.421298 |
| M062X energy = -737.598954464 a.u. |           |           |           | C                                  | 1.040811  | -0.782308 | 0.167993  |
| (1R,5S,6S,7S,10R)-2, Conf. B       |           |           |           | C                                  | 2.426362  | -1.079561 | -0.450902 |
| C                                  | 3.438791  | 0.035977  | -0.192688 | C                                  | -0.893998 | 0.897130  | -0.073209 |
| C                                  | 2.917151  | 1.398006  | -0.671706 | C                                  | -1.839094 | -0.224724 | -0.502150 |
| C                                  | 1.556174  | 1.658915  | -0.082745 | C                                  | -1.392406 | -1.559239 | 0.100090  |
| C                                  | 0.559137  | 0.572912  | -0.422587 | C                                  | 0.057100  | -1.877894 | -0.263272 |
| C                                  | 1.041585  | -0.778340 | 0.177914  | C                                  | -3.314965 | 0.134287  | -0.232497 |

|   |           |           |           |
|---|-----------|-----------|-----------|
| C | -4.254611 | -0.979895 | -0.693843 |
| C | -3.599304 | 0.498441  | 1.225283  |
| O | -1.327380 | 2.074060  | -0.741678 |
| C | 1.324420  | 2.676905  | 0.745593  |
| O | 2.946872  | -2.329476 | -0.028460 |
| H | 0.585845  | 0.460333  | -1.516039 |
| C | 1.137078  | -0.739404 | 1.698403  |
| H | 3.697253  | 0.084289  | 0.839354  |
| H | 4.359751  | -0.216840 | -0.760968 |
| H | 3.612157  | 2.194614  | -0.408683 |
| H | 2.819552  | 1.401748  | -1.770487 |
| H | 2.275559  | -1.195340 | -1.530095 |
| H | -0.979948 | 1.039895  | 1.012366  |
| H | -1.732380 | -0.305642 | -1.593078 |
| H | -2.031824 | -2.360604 | -0.273962 |
| H | -1.518691 | -1.548527 | 1.186879  |
| H | 0.125265  | -1.994689 | -1.351409 |
| H | 0.367710  | -2.829358 | 0.172907  |
| H | -3.524086 | 1.020053  | -0.836785 |
| H | -4.209099 | -1.843647 | -0.026322 |
| H | -5.287549 | -0.627434 | -0.701530 |
| H | -4.006943 | -1.319074 | -1.702817 |
| H | -4.667413 | 0.677494  | 1.364254  |
| H | -3.074014 | 1.406414  | 1.524304  |
| H | -3.313239 | -0.308184 | 1.905731  |
| H | -0.636884 | 2.740585  | -0.667846 |
| H | 0.366185  | 2.828842  | 1.230140  |
| H | 2.105149  | 3.392993  | 0.973863  |
| H | 3.277627  | -2.234740 | 0.870290  |
| H | 1.836074  | 0.020348  | 2.048510  |
| H | 0.172667  | -0.517285 | 2.154758  |
| H | 1.452673  | -1.713306 | 2.080668  |

M062X energy = -737.598552711 a.u.

(1R,5S,6S,7S,10R)-2, Conf. D

|   |           |           |           |
|---|-----------|-----------|-----------|
| C | 3.394129  | 0.436770  | -0.243515 |
| C | 2.651205  | 1.726963  | -0.614904 |
| C | 1.284185  | 1.740297  | 0.016121  |
| C | 0.453935  | 0.533680  | -0.367097 |
| C | 1.162814  | -0.753012 | 0.142751  |
| C | 2.551313  | -0.793881 | -0.538472 |
| C | -1.020672 | 0.615890  | 0.029832  |
| C | -1.798423 | -0.612564 | -0.441511 |
| C | -1.128796 | -1.887373 | 0.078210  |
| C | 0.345260  | -1.970956 | -0.311249 |
| C | -3.301268 | -0.588953 | -0.072503 |
| C | -3.563452 | -0.060053 | 1.338237  |
| C | -4.155838 | 0.169908  | -1.088844 |
| O | -1.635703 | 1.753502  | -0.560858 |
| C | 0.916912  | 2.676325  | 0.886772  |
| O | 3.320082  | -1.919280 | -0.144334 |
| H | 0.464179  | 0.481445  | -1.466925 |
| C | 1.316945  | -0.767154 | 1.667837  |
| H | 3.652502  | 0.441646  | 0.818130  |
| H | 4.329604  | 0.358674  | -0.799930 |
| H | 3.226913  | 2.600790  | -0.307777 |

|   |           |           |           |
|---|-----------|-----------|-----------|
| H | 2.540267  | 1.771256  | -1.704406 |
| H | 2.374663  | -0.836430 | -1.624105 |
| H | -1.092942 | 0.685184  | 1.123802  |
| H | -1.724282 | -0.617961 | -1.537242 |
| H | -1.657941 | -2.753084 | -0.327170 |
| H | -1.239313 | -1.945974 | 1.165465  |
| H | 0.411334  | -2.051207 | -1.404063 |
| H | 0.780350  | -2.883027 | 0.109871  |
| H | -3.628897 | -1.635041 | -0.096076 |
| H | -2.950460 | -0.564369 | 2.089451  |
| H | -3.358425 | 1.011755  | 1.387893  |
| H | -4.609820 | -0.212270 | 1.608823  |
| H | -3.898753 | 1.228113  | -1.097486 |
| H | -5.215290 | 0.069603  | -0.841638 |
| H | -4.007763 | -0.223683 | -2.096797 |
| H | -1.039982 | 2.504601  | -0.469851 |
| H | -0.040841 | 2.657908  | 1.395194  |
| H | 1.586027  | 3.490883  | 1.137888  |
| H | 2.900833  | -2.716711 | -0.479702 |
| H | 1.937780  | -1.614356 | 1.962812  |
| H | 1.783986  | 0.144149  | 2.039257  |
| H | 0.351738  | -0.860983 | 2.166122  |

M062X energy = -737.597842623 a.u.

(1R,5S,6S,7S,10R)-2, Conf. E

|   |           |           |           |
|---|-----------|-----------|-----------|
| C | 3.389029  | 0.440395  | -0.235113 |
| C | 2.648936  | 1.730100  | -0.616412 |
| C | 1.283933  | 1.739792  | 0.019089  |
| C | 0.453873  | 0.535761  | -0.370490 |
| C | 1.157390  | -0.757479 | 0.130988  |
| C | 2.546881  | -0.796471 | -0.532699 |
| C | -1.020829 | 0.615512  | 0.027742  |
| C | -1.800039 | -0.610280 | -0.449077 |
| C | -1.126203 | -1.891455 | 0.051579  |
| C | 0.345077  | -1.969476 | -0.345674 |
| C | -3.300528 | -0.589131 | -0.071152 |
| C | -3.554423 | -0.073958 | 1.346249  |
| C | -4.161958 | 0.179228  | -1.074560 |
| O | -1.635212 | 1.757414  | -0.556960 |
| C | 0.922096  | 2.669361  | 0.898773  |
| O | 3.201356  | -1.981122 | -0.103003 |
| H | 0.463593  | 0.489435  | -1.470277 |
| C | 1.296218  | -0.786236 | 1.658393  |
| H | 3.639642  | 0.451512  | 0.828225  |
| H | 4.331637  | 0.375398  | -0.787643 |
| H | 3.224550  | 2.605695  | -0.313989 |
| H | 2.536430  | 1.767805  | -1.705859 |
| H | 2.378684  | -0.848397 | -1.619236 |
| H | -1.093101 | 0.680722  | 1.121614  |
| H | -1.732474 | -0.604786 | -1.545226 |
| H | -1.656891 | -2.751047 | -0.364842 |
| H | -1.235273 | -1.966791 | 1.138177  |
| H | 0.408648  | -2.020991 | -1.439445 |
| H | 0.803761  | -2.881597 | 0.040495  |
| H | -3.628013 | -1.634988 | -0.102472 |
| H | -4.598512 | -0.231148 | 1.622895  |

|   |           |           |           |
|---|-----------|-----------|-----------|
| H | -2.934669 | -0.584068 | 2.087957  |
| H | -3.351649 | 0.997934  | 1.404715  |
| H | -5.219923 | 0.076240  | -0.821789 |
| H | -4.020006 | -0.204616 | -2.087158 |
| H | -3.905323 | 1.237636  | -1.074862 |
| H | -1.041635 | 2.508859  | -0.456645 |
| H | -0.033592 | 2.646884  | 1.410811  |
| H | 1.592458  | 3.481900  | 1.153285  |
| H | 4.074183  | -2.015621 | -0.504043 |
| H | 0.321467  | -0.834390 | 2.143896  |
| H | 1.868443  | -1.665911 | 1.954262  |
| H | 1.801689  | 0.100016  | 2.041024  |

M062X energy = -737.597479768 a.u.

(1R,5S,6S,7S,10R)-2, Conf. F

|   |           |           |           |
|---|-----------|-----------|-----------|
| C | 3.392303  | 0.442884  | -0.265531 |
| C | 2.643378  | 1.734545  | -0.620811 |
| C | 1.285423  | 1.735449  | 0.028687  |
| C | 0.453895  | 0.535833  | -0.369555 |
| C | 1.156814  | -0.761253 | 0.120238  |
| C | 2.553176  | -0.801293 | -0.542866 |
| C | -1.022045 | 0.616742  | 0.026049  |
| C | -1.803103 | -0.607997 | -0.450254 |
| C | -1.127093 | -1.890360 | 0.045626  |
| C | 0.340672  | -1.965961 | -0.364525 |
| C | -3.302471 | -0.586850 | -0.067853 |
| C | -3.552227 | -0.075878 | 1.351741  |
| C | -4.165700 | 0.185552  | -1.066566 |
| O | -1.632928 | 1.760271  | -0.558224 |
| C | 0.928235  | 2.653404  | 0.922460  |
| O | 3.270828  | -1.979023 | -0.211877 |

|   |           |           |           |
|---|-----------|-----------|-----------|
| H | 0.465812  | 0.496009  | -1.469594 |
| C | 1.288625  | -0.799082 | 1.648078  |
| H | 3.666733  | 0.466030  | 0.794729  |
| H | 4.321194  | 0.367984  | -0.834028 |
| H | 3.221096  | 2.608113  | -0.316257 |
| H | 2.518717  | 1.783116  | -1.708309 |
| H | 2.390906  | -0.873347 | -1.624146 |
| H | -1.097440 | 0.682582  | 1.119538  |
| H | -1.738895 | -0.601470 | -1.546526 |
| H | -1.661542 | -2.749248 | -0.367196 |
| H | -1.227261 | -1.966336 | 1.133391  |
| H | 0.395014  | -2.002657 | -1.459073 |
| H | 0.802720  | -2.884547 | 0.002549  |
| H | -3.630854 | -1.632312 | -0.101640 |
| H | -4.595541 | -0.233665 | 1.630845  |
| H | -2.930744 | -0.588392 | 2.090455  |
| H | -3.349409 | 0.995878  | 1.413016  |
| H | -5.223039 | 0.083299  | -0.811034 |
| H | -4.027183 | -0.195566 | -2.080606 |
| H | -3.907647 | 1.243619  | -1.064591 |
| H | -1.042522 | 2.512691  | -0.446116 |
| H | -0.025121 | 2.624561  | 1.438612  |
| H | 1.598683  | 3.464385  | 1.181732  |
| H | 3.606351  | -1.890393 | 0.685739  |
| H | 0.315087  | -0.750571 | 2.135677  |
| H | 1.754199  | -1.737038 | 1.960559  |
| H | 1.878180  | 0.032875  | 2.033574  |

M062X energy = -737.597466797 a.u.

**Table S36.** Cartesian coordinates and energies of the low-energy conformers calculated at the B3LYP/6-31+G(d,p) SMD (solvent: CHCl<sub>3</sub>) level.

|                                                                           |           |           |           |                                                                           |           |           |           |
|---------------------------------------------------------------------------|-----------|-----------|-----------|---------------------------------------------------------------------------|-----------|-----------|-----------|
| (1 <i>R</i> ,5 <i>S</i> ,6 <i>S</i> ,7 <i>S</i> ,10 <i>R</i> )-2, Conf. A |           |           |           | C                                                                         | 2.433918  | -1.087463 | -0.493998 |
| C                                                                         | 3.474215  | 0.016251  | -0.260844 | C                                                                         | -0.893353 | 0.931391  | -0.036390 |
| C                                                                         | 2.941909  | 1.406191  | -0.666975 | C                                                                         | -1.862665 | -0.189060 | -0.457058 |
| C                                                                         | 1.593301  | 1.668493  | -0.035364 | C                                                                         | -1.407386 | -1.538512 | 0.127480  |
| C                                                                         | 0.574160  | 0.590462  | -0.377132 | C                                                                         | 0.038433  | -1.873749 | -0.260909 |
| C                                                                         | 1.059575  | -0.790474 | 0.194366  | C                                                                         | -3.351504 | 0.161487  | -0.168358 |
| C                                                                         | 2.435487  | -1.083698 | -0.484077 | C                                                                         | -4.309024 | -0.779293 | -0.919338 |
| C                                                                         | -0.891359 | 0.932821  | -0.038446 | C                                                                         | -3.711836 | 0.212438  | 1.326288  |
| C                                                                         | -1.859511 | -0.190239 | -0.454378 | O                                                                         | -1.302928 | 2.117670  | -0.746594 |
| C                                                                         | -1.408219 | -1.534108 | 0.144695  | C                                                                         | 1.384706  | 2.696123  | 0.808617  |
| C                                                                         | 0.040457  | -1.873939 | -0.231216 | O                                                                         | 2.974163  | -2.364639 | -0.118261 |
| C                                                                         | -3.349631 | 0.162266  | -0.174846 | H                                                                         | 0.596431  | 0.493441  | -1.475745 |
| C                                                                         | -4.304155 | -0.784173 | -0.922526 | C                                                                         | 1.187187  | -0.790155 | 1.716318  |
| C                                                                         | -3.716214 | 0.225985  | 1.317758  | H                                                                         | 3.776040  | 0.035983  | 0.776980  |
| O                                                                         | -1.301125 | 2.114061  | -0.756543 | H                                                                         | 4.366637  | -0.216238 | -0.864174 |
| C                                                                         | 1.383463  | 2.708594  | 0.786049  | H                                                                         | 3.655149  | 2.190421  | -0.390273 |
| O                                                                         | 3.034447  | -2.307456 | -0.027494 | H                                                                         | 2.822791  | 1.454659  | -1.764914 |
| H                                                                         | 0.597927  | 0.483832  | -1.474347 | H                                                                         | 2.248369  | -1.186838 | -1.570984 |
| C                                                                         | 1.201391  | -0.773004 | 1.729401  | H                                                                         | -0.990464 | 1.115100  | 1.042939  |
| H                                                                         | 3.768063  | 0.024211  | 0.795320  | H                                                                         | -1.771490 | -0.259666 | -1.552499 |
| H                                                                         | 4.372687  | -0.225642 | -0.839741 | H                                                                         | -2.065753 | -2.335702 | -0.235352 |
| H                                                                         | 3.661182  | 2.181824  | -0.384710 | H                                                                         | -1.510450 | -1.531830 | 1.219286  |
| H                                                                         | 2.837687  | 1.440970  | -1.761395 | H                                                                         | 0.094118  | -1.981888 | -1.353661 |
| H                                                                         | 2.245896  | -1.168026 | -1.566373 | H                                                                         | 0.329766  | -2.841180 | 0.162935  |
| H                                                                         | -0.988815 | 1.122080  | 1.039918  | H                                                                         | -3.507415 | 1.167133  | -0.575541 |
| H                                                                         | -1.763741 | -0.270175 | -1.548825 | H                                                                         | -4.264264 | -1.806330 | -0.537460 |
| H                                                                         | -2.064161 | -2.335051 | -0.213991 | H                                                                         | -5.346027 | -0.438487 | -0.814061 |
| H                                                                         | -1.515776 | -1.517061 | 1.235531  | H                                                                         | -4.079051 | -0.810061 | -1.991529 |
| H                                                                         | 0.099320  | -2.004260 | -1.321975 | H                                                                         | -4.739240 | 0.573336  | 1.455174  |
| H                                                                         | 0.313898  | -2.836852 | 0.220424  | H                                                                         | -3.059019 | 0.889737  | 1.888671  |
| H                                                                         | -3.503057 | 1.164562  | -0.591006 | H                                                                         | -3.654389 | -0.776418 | 1.797223  |
| H                                                                         | -4.260600 | -1.808550 | -0.533325 | H                                                                         | -0.647143 | 2.811780  | -0.585910 |
| H                                                                         | -5.341579 | -0.443007 | -0.823145 | H                                                                         | 0.442161  | 2.861431  | 1.324764  |
| H                                                                         | -4.070703 | -0.822106 | -1.993764 | H                                                                         | 2.178810  | 3.407507  | 1.024666  |
| H                                                                         | -4.743537 | 0.589672  | 1.439013  | H                                                                         | 3.303031  | -2.307217 | 0.791192  |
| H                                                                         | -3.064658 | 0.906894  | 1.877085  | H                                                                         | 1.921909  | -0.062117 | 2.070130  |
| H                                                                         | -3.662493 | -0.758891 | 1.797433  | H                                                                         | 0.239081  | -0.545970 | 2.202563  |
| H                                                                         | -0.644916 | 2.809023  | -0.601283 | H                                                                         | 1.484655  | -1.780653 | 2.080074  |
| H                                                                         | 0.438733  | 2.881789  | 1.295622  | B3LYP energy = -737.769534039 a.u.                                        |           |           |           |
| H                                                                         | 2.177927  | 3.420643  | 0.998411  | (1 <i>R</i> ,5 <i>S</i> ,6 <i>S</i> ,7 <i>S</i> ,10 <i>R</i> )-2, Conf. C |           |           |           |
| H                                                                         | 2.481700  | -3.050623 | -0.308196 | C                                                                         | 3.469790  | 0.023247  | -0.248370 |
| H                                                                         | 1.587646  | -1.734965 | 2.080890  | C                                                                         | 2.939993  | 1.411446  | -0.666184 |
| H                                                                         | 1.884646  | 0.007367  | 2.073355  | C                                                                         | 1.591067  | 1.669684  | -0.033554 |
| H                                                                         | 0.240935  | -0.599073 | 2.222584  | C                                                                         | 0.573684  | 0.591342  | -0.379754 |
| B3LYP energy = -737.769717432 a.u.                                        |           |           |           | C                                                                         | 1.055452  | -0.794350 | 0.185164  |
| (1 <i>R</i> ,5 <i>S</i> ,6 <i>S</i> ,7 <i>S</i> ,10 <i>R</i> )-2, Conf. B |           |           |           | C                                                                         | 2.431147  | -1.082607 | -0.477909 |
| C                                                                         | 3.471616  | 0.022132  | -0.278268 | C                                                                         | -0.892322 | 0.931044  | -0.039602 |
| C                                                                         | 2.935183  | 1.414969  | -0.671684 | C                                                                         | -1.861367 | -0.190014 | -0.459591 |
| C                                                                         | 1.590945  | 1.667229  | -0.027814 | C                                                                         | -1.406821 | -1.539749 | 0.124386  |
| C                                                                         | 0.572581  | 0.591569  | -0.377929 | C                                                                         | 0.041061  | -1.874929 | -0.256127 |
| C                                                                         | 1.055509  | -0.796470 | 0.178767  | C                                                                         | -3.350093 | 0.160561  | -0.169568 |



|   |           |           |           |
|---|-----------|-----------|-----------|
| C | -4.308486 | -0.780575 | -0.919032 |
| C | -3.708956 | 0.212066  | 1.325474  |
| O | -1.302021 | 2.115488  | -0.753298 |
| C | 1.381433  | 2.705309  | 0.793634  |
| O | 2.913615  | -2.346513 | 0.009353  |
| H | 0.597615  | 0.489348  | -1.477145 |
| C | 1.182532  | -0.785521 | 1.722846  |
| H | 3.753313  | 0.036666  | 0.810371  |
| H | 4.377269  | -0.213953 | -0.819342 |
| H | 3.657763  | 2.189802  | -0.387429 |
| H | 2.835955  | 1.439496  | -1.760727 |
| H | 2.250747  | -1.169967 | -1.561645 |
| H | -0.990135 | 1.117039  | 1.039155  |
| H | -1.770885 | -0.259904 | -1.555211 |
| H | -2.062791 | -2.336964 | -0.242812 |
| H | -1.515071 | -1.535212 | 1.215466  |
| H | 0.102493  | -1.987468 | -1.348323 |
| H | 0.330678  | -2.839331 | 0.174855  |
| H | -3.506572 | 1.166043  | -0.576949 |
| H | -4.263376 | -1.807367 | -0.536563 |
| H | -5.345370 | -0.439674 | -0.812737 |
| H | -4.079794 | -0.811925 | -1.991512 |
| H | -4.735979 | 0.573787  | 1.455226  |
| H | -3.055061 | 0.888825  | 1.887181  |
| H | -3.651758 | -0.776663 | 1.796630  |
| H | -0.647221 | 2.810591  | -0.593112 |
| H | 0.437226  | 2.874329  | 1.305539  |
| H | 2.174999  | 3.417735  | 1.008135  |
| H | 3.744018  | -2.549243 | -0.445163 |
| H | 1.889323  | -0.030740 | 2.076654  |
| H | 0.223493  | -0.576806 | 2.204737  |
| H | 1.527701  | -1.761970 | 2.075406  |

B3LYP energy = -737.769283236 a.u.

(1R,5S,6S,7S,10R)-2, Conf. D

|   |           |           |           |
|---|-----------|-----------|-----------|
| C | 3.428331  | 0.425209  | -0.256976 |
| C | 2.684169  | 1.733873  | -0.590875 |
| C | 1.319190  | 1.750217  | 0.060652  |
| C | 0.472691  | 0.549677  | -0.342221 |
| C | 1.170424  | -0.772093 | 0.142835  |
| C | 2.572543  | -0.808847 | -0.543463 |
| C | -1.025158 | 0.645818  | 0.021261  |
| C | -1.823909 | -0.579695 | -0.458415 |
| C | -1.151790 | -1.878606 | 0.029745  |
| C | 0.327433  | -1.966629 | -0.362102 |
| C | -3.341546 | -0.574039 | -0.090243 |
| C | -3.632284 | -0.170897 | 1.365626  |
| C | -4.209438 | 0.246387  | -1.059449 |
| O | -1.606184 | 1.803405  | -0.610937 |
| C | 0.967994  | 2.695788  | 0.945946  |
| O | 3.356732  | -1.946968 | -0.150474 |
| H | 0.500663  | 0.512837  | -1.443952 |
| C | 1.310709  | -0.832633 | 1.676752  |
| H | 3.720897  | 0.423312  | 0.799461  |
| H | 4.351395  | 0.357204  | -0.843602 |
| H | 3.278856  | 2.596155  | -0.272324 |

|   |           |           |           |
|---|-----------|-----------|-----------|
| H | 2.562659  | 1.806669  | -1.681720 |
| H | 2.394369  | -0.862368 | -1.629719 |
| H | -1.133946 | 0.743662  | 1.110333  |
| H | -1.758964 | -0.573023 | -1.557206 |
| H | -1.687435 | -2.733370 | -0.401039 |
| H | -1.258253 | -1.970253 | 1.117790  |
| H | 0.399369  | -2.008181 | -1.459098 |
| H | 0.745602  | -2.907471 | 0.020607  |
| H | -3.662853 | -1.620649 | -0.198320 |
| H | -3.033426 | -0.743334 | 2.083646  |
| H | -3.438251 | 0.894387  | 1.535132  |
| H | -4.687040 | -0.352236 | 1.604552  |
| H | -3.995307 | 1.315917  | -0.983661 |
| H | -5.273911 | 0.091718  | -0.842076 |
| H | -4.037260 | -0.055819 | -2.099782 |
| H | -1.040265 | 2.566213  | -0.420202 |
| H | 0.017434  | 2.695217  | 1.473384  |
| H | 1.650360  | 3.505892  | 1.193267  |
| H | 2.921748  | -2.751304 | -0.467143 |
| H | 1.820712  | -1.754931 | 1.972203  |
| H | 1.886094  | 0.007602  | 2.073406  |
| H | 0.336220  | -0.816519 | 2.172912  |

B3LYP energy = -737.767695034 a.u.

(1R,5S,6S,7S,10R)-2, Conf. E

|   |           |           |           |
|---|-----------|-----------|-----------|
| C | 3.425720  | 0.427068  | -0.276543 |
| C | 2.678357  | 1.738439  | -0.596846 |
| C | 1.319482  | 1.747830  | 0.067105  |
| C | 0.470904  | 0.551542  | -0.342050 |
| C | 1.166677  | -0.776614 | 0.127878  |
| C | 2.569603  | -0.815111 | -0.554493 |
| C | -1.026288 | 0.644676  | 0.026714  |
| C | -1.826242 | -0.577011 | -0.461610 |
| C | -1.151683 | -1.880339 | 0.012923  |
| C | 0.324713  | -1.964696 | -0.387399 |
| C | -3.343307 | -0.573930 | -0.091746 |
| C | -3.632989 | -0.183596 | 1.367834  |
| C | -4.212232 | 0.254633  | -1.053150 |
| O | -1.608576 | 1.808923  | -0.592037 |
| C | 0.975915  | 2.683250  | 0.966224  |
| O | 3.299433  | -2.013423 | -0.244783 |
| H | 0.495694  | 0.522900  | -1.443882 |
| C | 1.302453  | -0.849771 | 1.663321  |
| H | 3.729950  | 0.432754  | 0.778758  |
| H | 4.343677  | 0.361050  | -0.871540 |
| H | 3.275136  | 2.599991  | -0.279847 |
| H | 2.547640  | 1.814786  | -1.686135 |
| H | 2.396822  | -0.884065 | -1.635933 |
| H | -1.132434 | 0.732225  | 1.117003  |
| H | -1.763186 | -0.560810 | -1.560377 |
| H | -1.689968 | -2.730918 | -0.423067 |
| H | -1.255444 | -1.981782 | 1.100762  |
| H | 0.392083  | -1.989874 | -1.484649 |
| H | 0.761796  | -2.902426 | -0.026941 |
| H | -3.664514 | -1.619575 | -0.208505 |
| H | -4.687743 | -0.366338 | 1.605820  |

|   |           |           |           |
|---|-----------|-----------|-----------|
| H | -3.034221 | -0.763499 | 2.079940  |
| H | -3.438024 | 0.879982  | 1.546933  |
| H | -5.276666 | 0.096305  | -0.837987 |
| H | -4.038958 | -0.037197 | -2.096231 |
| H | -3.999885 | 1.323748  | -0.966798 |
| H | -1.040896 | 2.569370  | -0.397314 |
| H | 0.028682  | 2.677200  | 1.499634  |
| H | 1.659478  | 3.491457  | 1.216521  |
| H | 3.618339  | -1.955004 | 0.668174  |
| H | 0.330815  | -0.781826 | 2.159982  |
| H | 1.746617  | -1.806116 | 1.963454  |
| H | 1.921845  | -0.044574 | 2.067809  |

B3LYP energy = -737.767553923 a.u.

(1R,5S,6S,7S,10R)-2, Conf. F

|   |           |           |           |
|---|-----------|-----------|-----------|
| C | 3.487192  | -0.007109 | -0.202407 |
| C | 2.979960  | 1.386747  | -0.614938 |
| C | 1.611340  | 1.679965  | -0.036430 |
| C | 0.582454  | 0.610698  | -0.385162 |
| C | 1.053976  | -0.783738 | 0.175624  |
| C | 2.441597  | -1.086134 | -0.473688 |
| C | -0.885994 | 0.944288  | -0.033810 |
| C | -1.860441 | -0.179807 | -0.458786 |
| C | -1.407283 | -1.540711 | 0.096927  |
| C | 0.043161  | -1.862126 | -0.280547 |
| C | -3.345645 | 0.163781  | -0.144858 |
| C | -4.314601 | -0.750353 | -0.913603 |
| C | -3.689695 | 0.167057  | 1.354748  |
| O | -1.280566 | 2.193147  | -0.630276 |
| C | 1.389326  | 2.755146  | 0.731160  |
| O | 3.009987  | -2.327972 | -0.026111 |
| H | 0.607509  | 0.505008  | -1.485376 |
| C | 1.166046  | -0.780101 | 1.713511  |
| H | 3.744512  | -0.013295 | 0.863245  |
| H | 4.401657  | -0.255343 | -0.753112 |
| H | 3.697588  | 2.155430  | -0.309829 |
| H | 2.916162  | 1.426164  | -1.713223 |
| H | 2.279163  | -1.147273 | -1.562327 |
| H | -0.974659 | 1.123288  | 1.042644  |
| H | -1.783853 | -0.237662 | -1.558545 |
| H | -2.059906 | -2.332777 | -0.287602 |
| H | -1.518751 | -1.556758 | 1.186944  |
| H | 0.110158  | -1.966717 | -1.373846 |
| H | 0.318330  | -2.834082 | 0.150149  |
| H | -3.502574 | 1.183902  | -0.514435 |
| H | -4.097959 | -0.751070 | -1.989216 |
| H | -4.268869 | -1.788470 | -0.562825 |
| H | -5.349194 | -0.410191 | -0.785874 |
| H | -4.713773 | 0.528582  | 1.505554  |
| H | -3.028078 | 0.821931  | 1.932854  |
| H | -3.633549 | -0.837095 | 1.791717  |
| H | -1.136355 | 2.132483  | -1.586962 |
| H | 0.412859  | 2.992883  | 1.139029  |
| H | 2.195853  | 3.449667  | 0.958490  |
| H | 2.454114  | -3.057771 | -0.333925 |
| H | 1.820923  | 0.015262  | 2.077578  |

|   |          |           |          |
|---|----------|-----------|----------|
| H | 0.193164 | -0.637740 | 2.192058 |
| H | 1.571795 | -1.735367 | 2.061479 |

B3LYP energy = -737.767356153 a.u.

(1R,5S,6S,7S,10R)-2, Conf. G

|   |           |           |           |
|---|-----------|-----------|-----------|
| C | 3.423002  | 0.426010  | -0.250920 |
| C | 2.682051  | 1.735699  | -0.592784 |
| C | 1.318147  | 1.750592  | 0.061290  |
| C | 0.471680  | 0.550180  | -0.341703 |
| C | 1.167595  | -0.774824 | 0.139345  |
| C | 2.563822  | -0.811093 | -0.540509 |
| C | -1.025765 | 0.643947  | 0.024446  |
| C | -1.824069 | -0.580346 | -0.459885 |
| C | -1.150742 | -1.880938 | 0.023073  |
| C | 0.327454  | -1.968223 | -0.369967 |
| C | -3.342018 | -0.575791 | -0.093631 |
| C | -3.635031 | -0.176159 | 1.362748  |
| C | -4.209242 | 0.246005  | -1.062380 |
| O | -1.607678 | 1.804528  | -0.602076 |
| C | 0.969572  | 2.693853  | 0.950182  |
| O | 3.238089  | -2.012397 | -0.127933 |
| H | 0.497673  | 0.515017  | -1.443244 |
| C | 1.304809  | -0.839122 | 1.674640  |
| H | 3.710131  | 0.426741  | 0.806847  |
| H | 4.350997  | 0.363133  | -0.834533 |
| H | 3.276806  | 2.599379  | -0.277971 |
| H | 2.559835  | 1.803228  | -1.683779 |
| H | 2.387311  | -0.863619 | -1.627082 |
| H | -1.133870 | 0.737207  | 1.113961  |
| H | -1.758265 | -0.569335 | -1.558622 |
| H | -1.687010 | -2.733912 | -0.410830 |
| H | -1.258741 | -1.977107 | 1.110806  |
| H | 0.399755  | -2.002936 | -1.466828 |
| H | 0.762140  | -2.902127 | 0.002235  |
| H | -3.662461 | -1.622348 | -0.204333 |
| H | -4.690042 | -0.358556 | 1.599901  |
| H | -3.036816 | -0.750431 | 2.079796  |
| H | -3.441552 | 0.888787  | 1.535150  |
| H | -5.274080 | 0.089304  | -0.847982 |
| H | -4.034261 | -0.053325 | -2.103090 |
| H | -3.996924 | 1.315689  | -0.983310 |
| H | -1.041034 | 2.566346  | -0.409738 |
| H | 0.020508  | 2.691004  | 1.480318  |
| H | 1.651870  | 3.504044  | 1.197439  |
| H | 4.088274  | -2.055779 | -0.588872 |
| H | 0.329044  | -0.809520 | 2.167520  |
| H | 1.799830  | -1.769640 | 1.967891  |
| H | 1.889997  | -0.007035 | 2.074753  |

B3LYP energy = -737.767345691 a.u.

(1R,5S,6S,7S,10R)-2, Conf. H

|   |          |           |           |
|---|----------|-----------|-----------|
| C | 3.485288 | -0.001219 | -0.221568 |
| C | 2.973136 | 1.395897  | -0.620272 |
| C | 1.609524 | 1.678286  | -0.026164 |
| C | 0.581335 | 0.612712  | -0.385526 |
| C | 1.049612 | -0.788763 | 0.159331  |

|   |           |           |           |
|---|-----------|-----------|-----------|
| C | 2.439628  | -1.089467 | -0.483897 |
| C | -0.887978 | 0.944467  | -0.034168 |
| C | -1.863597 | -0.178064 | -0.461164 |
| C | -1.405819 | -1.544321 | 0.079182  |
| C | 0.041360  | -1.859879 | -0.313005 |
| C | -3.347170 | 0.163246  | -0.137070 |
| C | -4.319907 | -0.745586 | -0.907390 |
| C | -3.683434 | 0.153857  | 1.364289  |
| O | -1.280443 | 2.195549  | -0.628124 |
| C | 1.391883  | 2.739314  | 0.762066  |
| O | 2.948387  | -2.382846 | -0.117989 |
| H | 0.608206  | 0.516615  | -1.486304 |
| C | 1.149315  | -0.798265 | 1.699544  |
| H | 3.755031  | -0.001399 | 0.843249  |
| H | 4.395709  | -0.245672 | -0.780916 |
| H | 3.692097  | 2.164086  | -0.316719 |
| H | 2.899043  | 1.441092  | -1.717455 |
| H | 2.280569  | -1.166604 | -1.567297 |
| H | -0.977977 | 1.122418  | 1.042253  |
| H | -1.792588 | -0.227536 | -1.561730 |
| H | -2.061362 | -2.332080 | -0.309425 |
| H | -1.511670 | -1.571822 | 1.169964  |
| H | 0.103566  | -1.938395 | -1.408251 |
| H | 0.337880  | -2.836144 | 0.085828  |
| H | -3.507144 | 1.186266  | -0.497533 |
| H | -5.353839 | -0.405858 | -0.773074 |
| H | -4.107720 | -0.740093 | -1.983850 |
| H | -4.272824 | -1.785825 | -0.563254 |
| H | -3.020907 | 0.806272  | 1.944248  |
| H | -3.621725 | -0.853692 | 1.792453  |
| H | -4.707839 | 0.510951  | 1.523398  |
| H | -1.154193 | 2.129121  | -1.587020 |
| H | 0.418027  | 2.967289  | 1.181768  |
| H | 2.197925  | 3.432794  | 0.994271  |
| H | 3.271270  | -2.341668 | 0.794440  |
| H | 1.450173  | -1.789267 | 2.059391  |
| H | 1.868174  | -0.065651 | 2.075297  |
| H | 0.189504  | -0.570113 | 2.170050  |

B3LYP energy = -737.767341767 a.u.

(1R,5S,6S,7S,10R)-2, Conf. I

|   |           |           |           |
|---|-----------|-----------|-----------|
| C | 3.482803  | -0.002498 | -0.183489 |
| C | 2.980933  | 1.389931  | -0.609484 |
| C | 1.610352  | 1.681323  | -0.034413 |
| C | 0.582838  | 0.612569  | -0.389152 |
| C | 1.048705  | -0.786934 | 0.164374  |
| C | 2.436981  | -1.084830 | -0.466231 |
| C | -0.886087 | 0.943731  | -0.036747 |
| C | -1.862307 | -0.178022 | -0.465142 |
| C | -1.405847 | -1.546908 | 0.069130  |
| C | 0.044314  | -1.861335 | -0.312432 |
| C | -3.345147 | 0.162618  | -0.136069 |
| C | -4.320394 | -0.745620 | -0.903950 |
| C | -3.676684 | 0.151453  | 1.366420  |
| O | -1.280206 | 2.194784  | -0.630020 |
| C | 1.387292  | 2.753973  | 0.736476  |

|   |           |           |           |
|---|-----------|-----------|-----------|
| O | 2.883348  | -2.368620 | 0.004628  |
| H | 0.608882  | 0.512430  | -1.489579 |
| C | 1.141050  | -0.793799 | 1.704945  |
| H | 3.726098  | -0.003852 | 0.885268  |
| H | 4.407633  | -0.246583 | -0.723171 |
| H | 3.697095  | 2.160858  | -0.306490 |
| H | 2.920528  | 1.421840  | -1.708128 |
| H | 2.286557  | -1.145529 | -1.556849 |
| H | -0.974605 | 1.120886  | 1.039885  |
| H | -1.793745 | -0.222909 | -1.566167 |
| H | -2.057852 | -2.332796 | -0.329161 |
| H | -1.519616 | -1.581643 | 1.158595  |
| H | 0.114979  | -1.943146 | -1.407093 |
| H | 0.337985  | -2.835150 | 0.093439  |
| H | -3.506617 | 1.186010  | -0.494781 |
| H | -4.111172 | -0.740211 | -1.981028 |
| H | -4.273033 | -1.785856 | -0.559867 |
| H | -5.353774 | -0.405332 | -0.766752 |
| H | -4.700701 | 0.508139  | 1.529011  |
| H | -3.012492 | 0.803223  | 1.945102  |
| H | -3.613405 | -0.856462 | 1.793376  |
| H | -1.153987 | 2.128897  | -1.588924 |
| H | 0.410156  | 2.989966  | 1.143685  |
| H | 2.193079  | 3.448383  | 0.966834  |
| H | 3.739931  | -2.558434 | -0.404667 |
| H | 1.813846  | -0.019829 | 2.082694  |
| H | 0.166005  | -0.623159 | 2.169212  |
| H | 1.510283  | -1.762966 | 2.053270  |

B3LYP energy = -737.767051037 a.u.

(1R,5S,6S,7S,10R)-2, Conf. J

|   |           |           |           |
|---|-----------|-----------|-----------|
| C | 3.485776  | -0.004588 | -0.223235 |
| C | 2.972620  | 1.389186  | -0.631181 |
| C | 1.608320  | 1.677665  | -0.041402 |
| C | 0.582614  | 0.606526  | -0.391598 |
| C | 1.056255  | -0.779698 | 0.184583  |
| C | 2.438058  | -1.086960 | -0.474928 |
| C | -0.882365 | 0.942158  | -0.053217 |
| C | -1.855257 | -0.190749 | -0.460031 |
| C | -1.404876 | -1.536299 | 0.134000  |
| C | 0.043175  | -1.866285 | -0.245474 |
| C | -3.346680 | 0.150131  | -0.169469 |
| C | -4.301817 | -0.813930 | -0.894109 |
| C | -3.700388 | 0.232709  | 1.325903  |
| O | -1.191801 | 2.148354  | -0.780231 |
| C | 1.391033  | 2.744182  | 0.738828  |
| O | 3.011606  | -2.324211 | -0.020224 |
| H | 0.609401  | 0.500490  | -1.489197 |
| C | 1.183455  | -0.759161 | 1.721401  |
| H | 3.758896  | -0.008000 | 0.838570  |
| H | 4.392460  | -0.253575 | -0.786407 |
| H | 3.691707  | 2.158467  | -0.330921 |
| H | 2.897803  | 1.430232  | -1.728400 |
| H | 2.265115  | -1.158797 | -1.560966 |
| H | -0.972502 | 1.141531  | 1.023385  |
| H | -1.766920 | -0.269055 | -1.554989 |

|   |           |           |           |
|---|-----------|-----------|-----------|
| H | -2.058400 | -2.337935 | -0.227863 |
| H | -1.511346 | -1.524778 | 1.224942  |
| H | 0.101757  | -1.991695 | -1.336890 |
| H | 0.321560  | -2.829610 | 0.202156  |
| H | -3.534172 | 1.141535  | -0.605690 |
| H | -4.248477 | -1.829679 | -0.485424 |
| H | -5.340180 | -0.476760 | -0.792889 |
| H | -4.074470 | -0.870210 | -1.965552 |
| H | -4.730577 | 0.585714  | 1.452871  |
| H | -3.050399 | 0.924731  | 1.873659  |
| H | -3.630573 | -0.745721 | 1.815443  |
| H | -2.018327 | 2.515678  | -0.438555 |
| H | 0.417572  | 2.974426  | 1.159066  |
| H | 2.196216  | 3.439955  | 0.966604  |
| H | 2.457747  | -3.057336 | -0.323666 |
| H | 1.575122  | -1.717335 | 2.077554  |
| H | 1.855561  | 0.028610  | 2.069858  |
| H | 0.217455  | -0.593359 | 2.206507  |

B3LYP energy = -737.766744927 a.u.

(1R,5S,6S,7S,10R)-2, Conf. K

|   |           |           |           |
|---|-----------|-----------|-----------|
| C | 3.483343  | 0.000885  | -0.242839 |
| C | 2.965573  | 1.397498  | -0.638019 |
| C | 1.606453  | 1.676239  | -0.033059 |
| C | 0.581133  | 0.607945  | -0.391209 |
| C | 1.051881  | -0.785339 | 0.169271  |
| C | 2.435831  | -1.090920 | -0.484874 |
| C | -0.884210 | 0.941203  | -0.050365 |
| C | -1.858306 | -0.188901 | -0.462694 |
| C | -1.404036 | -1.540482 | 0.116051  |
| C | 0.041124  | -1.865281 | -0.276366 |
| C | -3.348695 | 0.149472  | -0.163329 |
| C | -4.306227 | -0.809934 | -0.891060 |
| C | -3.696344 | 0.220482  | 1.334045  |
| O | -1.191478 | 2.152981  | -0.769054 |
| C | 1.393603  | 2.731377  | 0.763767  |
| O | 2.950386  | -2.379812 | -0.110534 |
| H | 0.607961  | 0.510753  | -1.489424 |
| C | 1.168062  | -0.777333 | 1.708555  |
| H | 3.768544  | 0.004258  | 0.818019  |
| H | 4.386031  | -0.244855 | -0.814098 |
| H | 3.686079  | 2.166461  | -0.340015 |
| H | 2.880494  | 1.443334  | -1.734077 |
| H | 2.265610  | -1.178961 | -1.565516 |
| H | -0.974696 | 1.134860  | 1.027301  |
| H | -1.774293 | -0.257404 | -1.558621 |
| H | -2.060044 | -2.337889 | -0.250813 |
| H | -1.506236 | -1.540176 | 1.207906  |
| H | 0.096236  | -1.966479 | -1.369893 |
| H | 0.339355  | -2.833182 | 0.141211  |
| H | -3.539945 | 1.143956  | -0.591252 |
| H | -4.081661 | -0.860015 | -1.963368 |
| H | -4.251756 | -1.828050 | -0.488607 |
| H | -5.344231 | -0.473084 | -0.784921 |
| H | -3.046420 | 0.910956  | 1.883918  |
| H | -3.620995 | -0.761238 | 1.816078  |

|   |           |           |           |
|---|-----------|-----------|-----------|
| H | -4.727193 | 0.568987  | 1.468082  |
| H | -2.028486 | 2.507572  | -0.439666 |
| H | 0.422722  | 2.953408  | 1.194365  |
| H | 2.198618  | 3.426551  | 0.994051  |
| H | 3.281787  | -2.328477 | 0.798281  |
| H | 1.895438  | -0.045194 | 2.068288  |
| H | 0.214498  | -0.536684 | 2.185750  |
| H | 1.466205  | -1.766226 | 2.076469  |

B3LYP energy = -737.766644706 a.u.

(1R,5S,6S,7S,10R)-2, Conf. L

|   |           |           |           |
|---|-----------|-----------|-----------|
| C | 3.481173  | 0.000614  | -0.209369 |
| C | 2.971844  | 1.392672  | -0.630111 |
| C | 1.606871  | 1.678823  | -0.040495 |
| C | 0.582319  | 0.607612  | -0.394322 |
| C | 1.051623  | -0.783057 | 0.175800  |
| C | 2.432718  | -1.086017 | -0.468265 |
| C | -0.882979 | 0.940611  | -0.054092 |
| C | -1.856866 | -0.190095 | -0.465731 |
| C | -1.403650 | -1.542056 | 0.112440  |
| C | 0.043884  | -1.867021 | -0.270586 |
| C | -3.347132 | 0.148227  | -0.164918 |
| C | -4.305443 | -0.813742 | -0.888248 |
| C | -3.692444 | 0.222837  | 1.332881  |
| O | -1.191793 | 2.151009  | -0.775083 |
| C | 1.389786  | 2.742516  | 0.743707  |
| O | 2.887493  | -2.363647 | 0.012082  |
| H | 0.609049  | 0.505648  | -1.492050 |
| C | 1.163091  | -0.770528 | 1.715232  |
| H | 3.743284  | 0.002889  | 0.855001  |
| H | 4.396878  | -0.244526 | -0.763985 |
| H | 3.689856  | 2.164478  | -0.333647 |
| H | 2.897863  | 1.426132  | -1.727557 |
| H | 2.268669  | -1.159275 | -1.555802 |
| H | -0.973212 | 1.135832  | 1.023197  |
| H | -1.773672 | -0.257939 | -1.561839 |
| H | -2.056852 | -2.339394 | -0.259626 |
| H | -1.512086 | -1.544201 | 1.203432  |
| H | 0.105735  | -1.974138 | -1.363354 |
| H | 0.339801  | -2.831370 | 0.155830  |
| H | -3.539651 | 1.141513  | -0.595074 |
| H | -4.250622 | -1.830352 | -0.482076 |
| H | -5.343333 | -0.476489 | -0.782164 |
| H | -4.082125 | -0.867778 | -1.960657 |
| H | -4.723545 | 0.570384  | 1.467595  |
| H | -3.042525 | 0.915519  | 1.879886  |
| H | -3.614995 | -0.757388 | 1.817550  |
| H | -2.027326 | 2.506854  | -0.443348 |
| H | 0.416420  | 2.970291  | 1.165419  |
| H | 2.194466  | 3.438434  | 0.972916  |
| H | 3.733873  | -2.561500 | -0.414200 |
| H | 1.517807  | -1.741860 | 2.072702  |
| H | 1.854977  | -0.004759 | 2.074339  |
| H | 0.196897  | -0.574271 | 2.187980  |

B3LYP energy -737.766422713 a.u.



**Table S37.** Cartesian coordinates and energies of the low-energy conformers calculated at the mPW1PW91/6-311+G(2d,p) SMD (solvent: CHCl<sub>3</sub>) level.

|                                                              |           |           |           |                                                              |           |           |           |
|--------------------------------------------------------------|-----------|-----------|-----------|--------------------------------------------------------------|-----------|-----------|-----------|
| (2 <i>S</i> ,6 <i>R</i> ,7 <i>S</i> ,8 <i>R</i> )-1, Conf. A |           |           |           | H                                                            | 4.637450  | -0.093639 | 1.433244  |
| C                                                            | -4.049193 | -1.457825 | -0.434979 | H                                                            | 5.399125  | 0.694077  | 0.046082  |
| C                                                            | -3.415881 | -0.209487 | -0.961078 | mPW1PW91 energy = -1155.17572935 a.u.                        |           |           |           |
| C                                                            | -3.325926 | 0.977958  | -0.357567 | (2 <i>S</i> ,6 <i>R</i> ,7 <i>S</i> ,8 <i>R</i> )-1, Conf. B |           |           |           |
| C                                                            | -4.076075 | 1.377417  | 0.876341  | C                                                            | -3.893497 | -1.705609 | -0.461938 |
| C                                                            | -1.844905 | -1.922834 | 0.670691  | C                                                            | -3.367745 | -0.410182 | -0.992338 |
| C                                                            | -2.956438 | -2.513575 | -0.153100 | C                                                            | -3.375269 | 0.781367  | -0.390010 |
| C                                                            | -0.899039 | 1.479376  | -0.834246 | C                                                            | -4.155726 | 1.119242  | 0.843291  |
| C                                                            | -0.389150 | 1.021436  | 0.553243  | C                                                            | -1.672485 | -1.961382 | 0.679990  |
| C                                                            | 0.185374  | -0.411041 | 0.581926  | C                                                            | -2.713356 | -2.655569 | -0.155272 |
| C                                                            | -0.799225 | -1.393080 | 0.035283  | C                                                            | -0.997698 | 1.490258  | -0.848636 |
| O                                                            | -0.015118 | 2.542447  | -1.261187 | C                                                            | -0.462356 | 1.100823  | 0.549792  |
| C                                                            | 0.835489  | 2.920220  | -0.294944 | C                                                            | 0.220074  | -0.284000 | 0.618830  |
| C                                                            | 0.623917  | 2.070133  | 0.900464  | C                                                            | -0.665359 | -1.346960 | 0.058374  |
| O                                                            | 1.620287  | 3.818437  | -0.451078 | O                                                            | -0.210407 | 2.622749  | -1.286317 |
| C                                                            | 1.271134  | 2.281022  | 2.037671  | C                                                            | 0.601179  | 3.084849  | -0.323423 |
| C                                                            | -2.334958 | 2.005454  | -0.867702 | C                                                            | 0.467243  | 2.229647  | 0.879651  |
| C                                                            | -2.088957 | -1.810181 | 2.142024  | O                                                            | 1.302057  | 4.048737  | -0.487650 |
| O                                                            | -4.939403 | -2.060313 | -1.372850 | C                                                            | 1.116344  | 2.492329  | 2.004997  |
| O                                                            | 1.363758  | -0.407670 | -0.245707 | C                                                            | -2.473972 | 1.886345  | -0.902844 |
| C                                                            | 2.398885  | -1.172145 | 0.139296  | C                                                            | -1.953828 | -1.859815 | 2.145464  |
| O                                                            | 2.403637  | -1.819920 | 1.155828  | O                                                            | -4.711063 | -2.394409 | -1.406142 |
| C                                                            | 3.504745  | -1.136576 | -0.876802 | O                                                            | 1.424669  | -0.221447 | -0.168834 |
| C                                                            | 4.895568  | -1.387789 | -0.300805 | C                                                            | 2.580473  | -0.585332 | 0.412032  |
| C                                                            | 5.896310  | -1.604759 | -1.429039 | O                                                            | 2.658604  | -1.003113 | 1.540004  |
| C                                                            | 5.334124  | -0.244012 | 0.605794  | C                                                            | 3.743291  | -0.356834 | -0.511375 |
| H                                                            | -4.587091 | -1.254176 | 0.494880  | C                                                            | 4.948168  | -1.250064 | -0.230791 |
| H                                                            | -2.845084 | -0.361777 | -1.875594 | C                                                            | 4.646911  | -2.704928 | -0.569994 |
| H                                                            | -4.796104 | 0.631705  | 1.209317  | C                                                            | 6.165414  | -0.748003 | -0.997015 |
| H                                                            | -4.621965 | 2.307407  | 0.686476  | H                                                            | -4.462033 | -1.543626 | 0.458234  |
| H                                                            | -2.573028 | -2.848389 | -1.119887 | H                                                            | -2.786856 | -0.517586 | -1.907201 |
| H                                                            | -3.424429 | -3.370456 | 0.338529  | H                                                            | -4.814300 | 0.317754  | 1.173795  |
| H                                                            | -3.395227 | 1.593166  | 1.705752  | H                                                            | -4.774071 | 2.002238  | 0.651532  |
| H                                                            | -1.210178 | 1.026369  | 1.270377  | H                                                            | -2.287295 | -2.962260 | -1.113436 |
| H                                                            | 0.484091  | -0.642165 | 1.603454  | H                                                            | -3.109405 | -3.547191 | 0.337637  |
| H                                                            | -0.728925 | -1.537137 | -1.038976 | H                                                            | -3.496528 | 1.388830  | 1.674595  |
| H                                                            | 1.111354  | 1.666669  | 2.916008  | H                                                            | -1.287642 | 1.058123  | 1.261286  |
| H                                                            | 1.989164  | 3.089830  | 2.110307  | H                                                            | 0.499496  | -0.477349 | 1.652943  |
| H                                                            | -2.387160 | 2.911084  | -0.257797 | H                                                            | -0.561703 | -1.492339 | -1.012880 |
| H                                                            | -0.781860 | 0.691177  | -1.575261 | H                                                            | 1.021222  | 1.869377  | 2.886436  |
| H                                                            | -2.562220 | 2.303441  | -1.894551 | H                                                            | 1.769863  | 3.355166  | 2.064329  |
| H                                                            | -2.946857 | -1.163542 | 2.353007  | H                                                            | -2.612390 | 2.790614  | -0.304537 |
| H                                                            | -1.229755 | -1.421987 | 2.688190  | H                                                            | -0.804254 | 0.703587  | -1.574924 |
| H                                                            | -2.334801 | -2.792208 | 2.556758  | H                                                            | -2.715271 | 2.150177  | -1.935846 |
| H                                                            | -5.614546 | -1.411895 | -1.596913 | H                                                            | -2.095282 | -2.858475 | 2.569701  |
| H                                                            | 3.254767  | -1.913711 | -1.608712 | H                                                            | -2.883301 | -1.312379 | 2.330877  |
| H                                                            | 3.464768  | -0.185625 | -1.412671 | H                                                            | -1.156158 | -1.369326 | 2.702575  |
| H                                                            | 4.845460  | -2.302117 | 0.298132  | H                                                            | -5.446206 | -1.817186 | -1.636118 |
| H                                                            | 6.894492  | -1.802470 | -1.031445 | H                                                            | 3.403662  | -0.460378 | -1.544640 |
| H                                                            | 5.614363  | -2.452140 | -2.059278 | H                                                            | 4.014768  | 0.697716  | -0.383399 |
| H                                                            | 5.965460  | -0.720690 | -2.069996 | H                                                            | 5.162844  | -1.185072 | 0.840007  |
| H                                                            | 6.318656  | -0.442910 | 1.035706  |                                                              |           |           |           |

|   |          |           |           |
|---|----------|-----------|-----------|
| H | 5.497825 | -3.346775 | -0.329630 |
| H | 3.784417 | -3.078694 | -0.013850 |
| H | 4.435438 | -2.820759 | -1.637508 |
| H | 7.039448 | -1.370340 | -0.791318 |
| H | 6.415544 | 0.280005  | -0.722993 |
| H | 5.990443 | -0.771079 | -2.076877 |

mPW1PW91 energy = -1155.17567708 a.u.

(2S,6R,7S,8R)-1, Conf. C

|   |           |           |           |
|---|-----------|-----------|-----------|
| C | -4.152907 | -1.293114 | -0.447172 |
| C | -3.453954 | -0.076188 | -0.962402 |
| C | -3.278400 | 1.090632  | -0.337800 |
| C | -3.977833 | 1.509531  | 0.919047  |
| C | -1.968528 | -1.915932 | 0.625547  |
| C | -3.122528 | -2.417947 | -0.199509 |
| C | -0.831208 | 1.462518  | -0.825322 |
| C | -0.346509 | 0.948068  | 0.551323  |
| C | 0.140941  | -0.516444 | 0.552081  |
| C | -0.904385 | -1.423111 | -0.009383 |
| O | 0.108846  | 2.485336  | -1.231084 |
| C | 0.982740  | 2.791842  | -0.260501 |
| C | 0.727396  | 1.927897  | 0.915893  |
| O | 1.816641  | 3.647600  | -0.399965 |
| C | 1.390920  | 2.074015  | 2.053780  |
| C | -2.236812 | 2.066173  | -0.848019 |
| C | -2.185880 | -1.838870 | 2.103260  |
| O | -5.089952 | -1.825084 | -1.382179 |
| O | 1.311911  | -0.584396 | -0.283696 |
| C | 2.388303  | -1.238564 | 0.183616  |
| O | 2.443878  | -1.734563 | 1.280950  |
| C | 3.473696  | -1.303509 | -0.852894 |
| C | 4.887890  | -1.327830 | -0.278231 |
| C | 5.890446  | -1.656126 | -1.377332 |
| C | 5.232566  | -0.006859 | 0.398783  |
| H | -4.665855 | -1.073641 | 0.493272  |
| H | -2.915005 | -0.244286 | -1.893496 |
| H | -3.268497 | 1.687430  | 1.733290  |
| H | -4.720946 | 0.792314  | 1.263574  |
| H | -2.769665 | -2.753407 | -1.177677 |
| H | -3.636916 | -3.255880 | 0.278154  |
| H | -4.487014 | 2.464466  | 0.751451  |
| H | -1.164497 | 0.983702  | 1.270951  |
| H | 0.428967  | -0.781940 | 1.567879  |
| H | -0.857416 | -1.535976 | -1.088611 |
| H | 1.200200  | 1.448349  | 2.917767  |
| H | 2.155047  | 2.837887  | 2.140947  |
| H | -2.236679 | 2.969686  | -0.233089 |
| H | -0.754994 | 0.684899  | -1.582830 |
| H | -2.453137 | 2.380923  | -1.872103 |
| H | -3.004533 | -1.154297 | 2.347859  |
| H | -1.299861 | -1.515898 | 2.648995  |
| H | -2.479999 | -2.819244 | 2.489544  |
| H | -5.726046 | -1.132889 | -1.589032 |
| H | 3.282649  | -2.224203 | -1.417092 |
| H | 3.348330  | -0.477286 | -1.555937 |
| H | 4.925911  | -2.120738 | 0.474754  |

|   |          |           |           |
|---|----------|-----------|-----------|
| H | 6.907444 | -1.691906 | -0.980034 |
| H | 5.678537 | -2.623995 | -1.838797 |
| H | 5.870935 | -0.898266 | -2.166204 |
| H | 6.233712 | -0.042492 | 0.834790  |
| H | 4.531000 | 0.231134  | 1.201374  |
| H | 5.212025 | 0.817313  | -0.320489 |

mPW1PW91 energy = -1155.17561540 a.u.

(2S,6R,7S,8R)-1, Conf. D

|   |           |           |           |
|---|-----------|-----------|-----------|
| C | -3.708836 | -1.611708 | -0.473086 |
| C | -3.052314 | -0.435648 | -1.121592 |
| C | -3.093207 | 0.840443  | -0.731916 |
| C | -4.030898 | 1.399763  | 0.294084  |
| C | -1.676535 | -1.734815 | 0.995335  |
| C | -2.630098 | -2.529722 | 0.145624  |
| C | -0.642838 | 1.404823  | -0.952743 |
| C | -0.322277 | 1.232590  | 0.551139  |
| C | 0.285242  | -0.136990 | 0.926323  |
| C | -0.567898 | -1.257237 | 0.428552  |
| O | 0.250479  | 2.431846  | -1.444140 |
| C | 0.939253  | 3.026052  | -0.458077 |
| C | 0.600708  | 2.379431  | 1.831648  |
| O | 1.698595  | 3.935241  | -0.667983 |
| C | 1.093539  | 2.807314  | 1.985156  |
| C | -2.077542 | 1.823685  | -1.278398 |
| C | -2.142651 | -1.387292 | 2.373166  |
| O | -4.423511 | -2.424250 | -1.402553 |
| O | 1.579768  | -0.216488 | 0.300617  |
| C | 2.612376  | -0.654937 | 1.038402  |
| O | 2.511649  | -0.987751 | 2.193607  |
| C | 3.890343  | -0.651457 | 0.249833  |
| C | 3.851791  | -1.494073 | -1.031114 |
| C | 5.164501  | -1.340126 | -1.788504 |
| C | 3.561803  | -2.958917 | -0.727559 |
| H | -4.388129 | -1.285220 | 0.319035  |
| H | -2.350788 | -0.708121 | -1.908397 |
| H | -4.581902 | 2.241299  | -0.138566 |
| H | -3.489927 | 1.805823  | 1.154493  |
| H | -2.095933 | -3.002486 | -0.681872 |
| H | -3.132684 | -3.315654 | 0.715202  |
| H | -4.759482 | 0.677089  | 0.658057  |
| H | -1.237348 | 1.321397  | 1.136763  |
| H | 0.426604  | -0.167519 | 2.005495  |
| H | -0.332038 | -1.577802 | -0.581923 |
| H | 0.846178  | 2.336143  | 2.929176  |
| H | 1.770982  | 3.653316  | 2.004538  |
| H | -2.252581 | 2.816526  | -0.856247 |
| H | -0.388884 | 0.507303  | -1.513047 |
| H | -2.162979 | 1.922356  | -2.363670 |
| H | -3.067096 | -0.802074 | 2.341314  |
| H | -1.405455 | -0.825790 | 2.945976  |
| H | -2.376672 | -2.299828 | 2.929843  |
| H | -5.103502 | -1.877691 | -1.809349 |
| H | 4.107830  | 0.389650  | -0.007428 |
| H | 4.679639  | -1.004181 | 0.915033  |
| H | 3.046407  | -1.104865 | -1.661001 |

|   |          |           |           |
|---|----------|-----------|-----------|
| H | 5.144563 | -1.906078 | -2.722905 |
| H | 5.364872 | -0.294634 | -2.035502 |
| H | 6.005843 | -1.710740 | -1.195415 |
| H | 3.518757 | -3.544835 | -1.648621 |
| H | 2.607845 | -3.089538 | -0.210467 |
| H | 4.343272 | -3.389698 | -0.094537 |

mPW1PW91 energy = -1155.17532997 a.u.

(2*S*,6*R*,7*S*,8*R*)-1, Conf. E

|   |           |           |           |
|---|-----------|-----------|-----------|
| C | -4.151926 | -0.969664 | -0.534670 |
| C | -3.318892 | 0.178817  | -1.006498 |
| C | -3.066190 | 1.321870  | -0.364451 |
| C | -3.788643 | 1.802854  | 0.856583  |
| C | -2.073679 | -1.803522 | 0.604561  |
| C | -3.242279 | -2.188861 | -0.261010 |
| C | -0.575149 | 1.454689  | -0.752104 |
| C | -0.192951 | 0.878236  | 0.631243  |
| C | 0.166818  | -0.621964 | 0.617211  |
| C | -0.942269 | -1.421507 | 0.012349  |
| O | 0.475735  | 2.383705  | -1.108282 |
| C | 1.328986  | 2.602956  | -0.096238 |
| C | 0.940196  | 1.760449  | 1.059538  |
| O | 2.241868  | 3.380839  | -0.188184 |
| C | 1.542589  | 1.855132  | 2.236135  |
| C | -1.911923 | 2.195781  | -0.813019 |
| C | -2.332110 | -1.711059 | 2.074543  |
| O | -5.097752 | -1.402383 | -1.511173 |
| O | 1.356616  | -0.759134 | -0.181798 |
| C | 2.163616  | -1.797434 | 0.090547  |
| O | 1.946249  | -2.586504 | 0.976657  |
| C | 3.342720  | -1.838956 | -0.837170 |
| C | 4.316862  | -0.663968 | -0.663526 |
| C | 4.875066  | -0.599017 | 0.752448  |
| C | 5.438957  | -0.779059 | -1.687369 |
| H | -4.678490 | -0.709899 | 0.387956  |
| H | -2.751119 | -0.036977 | -1.910463 |
| H | -3.115366 | 1.886449  | 1.715556  |
| H | -4.630219 | 1.173101  | 1.140811  |
| H | -2.891324 | -2.552921 | -1.229556 |
| H | -3.849060 | -2.975602 | 0.194418  |
| H | -4.173089 | 2.812415  | 0.677366  |
| H | -1.033969 | 0.968472  | 1.318570  |
| H | 0.397920  | -0.932526 | 1.636039  |
| H | -0.865667 | -1.535486 | -1.065143 |
| H | 1.247301  | 1.250259  | 3.085669  |
| H | 2.360740  | 2.552939  | 2.373039  |
| H | -1.845956 | 3.082904  | -0.178092 |
| H | -0.550446 | 0.681981  | -1.517780 |
| H | -2.055710 | 2.550793  | -1.836846 |
| H | -3.101766 | -0.965009 | 2.296715  |
| H | -1.441026 | -1.460280 | 2.649045  |
| H | -2.713501 | -2.666632 | 2.446906  |
| H | -5.668597 | -0.655975 | -1.719939 |
| H | 3.859032  | -2.783432 | -0.659908 |
| H | 2.962912  | -1.843507 | -1.862464 |
| H | 3.766311  | 0.260671  | -0.861367 |

|   |          |           |           |
|---|----------|-----------|-----------|
| H | 5.562377 | 0.243602  | 0.856820  |
| H | 4.087630 | -0.473008 | 1.499409  |
| H | 5.425119 | -1.511843 | 0.999890  |
| H | 6.133341 | 0.059778  | -1.600824 |
| H | 5.051344 | -0.787100 | -2.709003 |
| H | 6.010752 | -1.699997 | -1.539201 |

mPW1PW91 energy = -1155.17503993 a.u.

(2*S*,6*R*,7*S*,8*R*)-1, Conf. F

|   |           |           |           |
|---|-----------|-----------|-----------|
| C | -4.056599 | -1.456405 | -0.431163 |
| C | -3.421255 | -0.208370 | -0.959273 |
| C | -3.327680 | 0.979914  | -0.359979 |
| C | -4.080027 | 1.383092  | 0.870845  |
| C | -1.842091 | -1.920081 | 0.671976  |
| C | -2.954046 | -2.512178 | -0.149641 |
| C | -0.899768 | 1.478507  | -0.837544 |
| C | -0.390655 | 1.024417  | 0.551274  |
| C | 0.187179  | -0.406708 | 0.583426  |
| C | -0.793988 | -1.392921 | 0.038049  |
| O | -0.014555 | 2.539338  | -1.267532 |
| C | 0.834056  | 2.921117  | -0.300973 |
| C | 0.619993  | 2.075754  | 0.897363  |
| O | 1.619394  | 3.818450  | -0.459260 |
| C | 1.263630  | 2.291849  | 2.035617  |
| C | -2.335285 | 2.005016  | -0.872506 |
| C | -2.092457 | -1.799239 | 2.141650  |
| O | -5.044811 | -1.998497 | -1.300986 |
| O | 1.366600  | -0.402349 | -0.242887 |
| C | 2.398982  | -1.171742 | 0.140088  |
| O | 2.399787  | -1.824796 | 1.153191  |
| C | 3.506877  | -1.134423 | -0.873760 |
| C | 4.895949  | -1.391476 | -0.296136 |
| C | 5.898445  | -1.605875 | -1.423290 |
| C | 5.335427  | -0.252738 | 0.616347  |
| H | -4.590838 | -1.251773 | 0.495493  |
| H | -2.842085 | -0.360105 | -1.870067 |
| H | -3.401085 | 1.609194  | 1.699134  |
| H | -4.632201 | 2.307668  | 0.673205  |
| H | -2.562896 | -2.849141 | -1.114559 |
| H | -3.420819 | -3.369823 | 0.341478  |
| H | -4.797399 | 0.636124  | 1.206312  |
| H | -1.212773 | 1.028950  | 1.267156  |
| H | 0.485273  | -0.634920 | 1.605826  |
| H | -0.718860 | -1.541872 | -1.035355 |
| H | 1.101694  | 1.680928  | 2.915960  |
| H | 1.980494  | 3.101769  | 2.107297  |
| H | -2.386844 | 2.911932  | -0.264528 |
| H | -0.782464 | 0.687975  | -1.576129 |
| H | -2.562832 | 2.301570  | -1.899713 |
| H | -1.235107 | -1.408923 | 2.689063  |
| H | -2.341203 | -2.778643 | 2.560757  |
| H | -2.950373 | -1.150402 | 2.345394  |
| H | -4.632663 | -2.175927 | -2.153555 |
| H | 3.256674  | -1.908017 | -1.609380 |
| H | 3.470242  | -0.181140 | -1.405700 |
| H | 4.842437  | -2.308269 | 0.298722  |



|   |          |           |           |
|---|----------|-----------|-----------|
| H | 6.895143 | -1.808477 | -1.024479 |
| H | 5.615471 | -2.449356 | -2.058306 |
| H | 5.971640 | -0.718837 | -2.059661 |
| H | 6.318793 | -0.455802 | 1.046930  |
| H | 4.637721 | -0.104607 | 1.443316  |
| H | 5.403410 | 0.687682  | 0.060948  |

mPW1PW91 energy = -1155.17465551 a.u.

(2*S*,6*R*,7*S*,8*R*)-1, Conf. G

|   |           |           |           |
|---|-----------|-----------|-----------|
| C | -3.906026 | -1.699617 | -0.460046 |
| C | -3.375614 | -0.404028 | -0.988869 |
| C | -3.377411 | 0.787682  | -0.388955 |
| C | -4.158519 | 1.129366  | 0.842320  |
| C | -1.675162 | -1.957986 | 0.679838  |
| C | -2.717879 | -2.650621 | -0.153866 |
| C | -0.997606 | 1.488333  | -0.850532 |
| C | -0.462498 | 1.101187  | 0.548382  |
| C | 0.220222  | -0.283460 | 0.619867  |
| C | -0.663708 | -1.348213 | 0.060279  |
| O | -0.206069 | 2.616170  | -1.292584 |
| C | 0.605545  | 3.080084  | -0.330483 |
| C | 0.467701  | 2.230139  | 0.875912  |
| O | 1.309454  | 4.041173  | -0.497939 |
| C | 1.114822  | 2.496392  | 2.001549  |
| C | -2.472452 | 1.889102  | -0.903535 |
| C | -1.963792 | -1.848431 | 2.143367  |
| O | -4.825288 | -2.334107 | -1.342599 |
| O | 1.425520  | -0.221856 | -0.166901 |
| C | 2.580650  | -0.586350 | 0.415246  |
| O | 2.657150  | -1.004616 | 1.543089  |
| C | 3.744679  | -0.358111 | -0.506670 |
| C | 4.948656  | -1.252218 | -0.225127 |
| C | 4.646813  | -2.706902 | -0.564616 |
| C | 6.166882  | -0.750942 | -0.990290 |
| H | -4.473312 | -1.537815 | 0.455805  |
| H | -2.787199 | -0.509253 | -1.900822 |
| H | -4.782547 | 2.006814  | 0.643818  |
| H | -3.500323 | 1.408748  | 1.671249  |
| H | -2.285155 | -2.957327 | -1.111082 |
| H | -3.113851 | -3.543224 | 0.337037  |
| H | -4.814161 | 0.327291  | 1.176754  |
| H | -1.288153 | 1.059799  | 1.259539  |
| H | 0.498832  | -0.475007 | 1.654552  |
| H | -0.554832 | -1.498045 | -1.009981 |
| H | 1.016623  | 1.877340  | 2.885393  |
| H | 1.769492  | 3.358502  | 2.058787  |
| H | -2.607187 | 2.793978  | -0.305342 |
| H | -0.807399 | 0.698739  | -1.574615 |
| H | -2.714783 | 2.153957  | -1.936035 |
| H | -2.111023 | -2.844439 | 2.571768  |
| H | -2.892083 | -1.296642 | 2.321319  |
| H | -1.167157 | -1.358059 | 2.701961  |
| H | -4.376964 | -2.496940 | -2.179684 |
| H | 3.406265  | -0.460844 | -1.540434 |
| H | 4.016670  | 0.696200  | -0.377877 |
| H | 5.162469  | -1.187460 | 0.845842  |

|   |          |           |           |
|---|----------|-----------|-----------|
| H | 5.497265 | -3.349165 | -0.323784 |
| H | 3.783903 | -3.080281 | -0.008836 |
| H | 4.436013 | -2.822601 | -1.632304 |
| H | 7.040415 | -1.373620 | -0.783549 |
| H | 6.417230 | 0.277003  | -0.716292 |
| H | 5.992991 | -0.774192 | -2.070332 |

mPW1PW91 energy = -1155.17463629 a.u.

(2*S*,6*R*,7*S*,8*R*)-1, Conf. H

|   |           |           |           |
|---|-----------|-----------|-----------|
| C | -3.755989 | -1.846235 | -0.450324 |
| C | -3.265373 | -0.558531 | -1.033279 |
| C | -3.349597 | 0.663421  | -0.504466 |
| C | -4.193815 | 1.032541  | 0.676276  |
| C | -1.570021 | -1.919997 | 0.800338  |
| C | -2.540119 | -2.714861 | -0.030191 |
| C | -0.991011 | 1.460717  | -0.899173 |
| C | -0.507730 | 1.175195  | 0.542182  |
| C | 0.248851  | -0.159528 | 0.709997  |
| C | -0.560965 | -1.301061 | 0.186510  |
| O | -0.233163 | 2.602733  | -1.363590 |
| C | 0.497463  | 3.162748  | -0.387550 |
| C | 0.333827  | 2.374862  | 0.857130  |
| O | 1.157537  | 4.151396  | -0.571610 |
| C | 0.877173  | 2.752113  | 2.005594  |
| C | -2.479464 | 1.779219  | -1.046664 |
| C | -1.929114 | -1.733550 | 2.240111  |
| O | -4.598203 | -2.579069 | -1.333579 |
| O | 1.466954  | -0.060413 | -0.052211 |
| C | 2.595898  | -0.531563 | 0.502076  |
| O | 2.638890  | -1.041940 | 1.593344  |
| C | 3.779820  | -0.295046 | -0.392245 |
| C | 4.892287  | -1.329255 | -0.239265 |
| C | 4.443903  | -2.701214 | -0.728272 |
| C | 6.142400  | -0.865947 | -0.976206 |
| H | -4.376172 | -1.660047 | 0.425441  |
| H | -2.638129 | -0.685211 | -1.916252 |
| H | -3.582973 | 1.402795  | 1.505863  |
| H | -4.811820 | 0.214465  | 1.041815  |
| H | -2.050106 | -3.061388 | -0.945198 |
| H | -2.916726 | -3.592392 | 0.501288  |
| H | -4.860870 | 1.856566  | 0.402171  |
| H | -1.361621 | 1.114819  | 1.217192  |
| H | 0.510815  | -0.278727 | 1.760103  |
| H | -0.396005 | -1.510937 | -0.866539 |
| H | 0.750989  | 2.183585  | 2.919521  |
| H | 1.472187  | 3.657033  | 2.051597  |
| H | -2.689305 | 2.710325  | -0.514123 |
| H | -0.724504 | 0.644906  | -1.568106 |
| H | -2.683081 | 1.966320  | -2.104254 |
| H | -2.048220 | -2.706962 | 2.725391  |
| H | -2.889501 | -1.218803 | 2.343306  |
| H | -1.181908 | -1.170321 | 2.798300  |
| H | -4.106070 | -2.758168 | -2.142206 |
| H | 3.439037  | -0.231407 | -1.428041 |
| H | 4.153702  | 0.701255  | -0.128954 |
| H | 5.126643  | -1.405917 | 0.826599  |

|   |          |           |           |
|---|----------|-----------|-----------|
| H | 5.234451 | -3.442295 | -0.588748 |
| H | 3.562784 | -3.054307 | -0.187959 |
| H | 4.199052 | -2.675696 | -1.794629 |
| H | 6.953409 | -1.588827 | -0.860809 |
| H | 6.496935 | 0.096838  | -0.599542 |
| H | 5.950331 | -0.753313 | -2.047544 |

mPW1PW91 energy = -1155.17462432 a.u.

(2*S*,6*R*,7*S*,8*R*)-1, Conf. I

|   |           |           |           |
|---|-----------|-----------|-----------|
| C | -4.177104 | -1.265119 | -0.439349 |
| C | -3.468361 | -0.052875 | -0.956000 |
| C | -3.274081 | 1.109470  | -0.330601 |
| C | -3.962875 | 1.530750  | 0.930797  |
| C | -1.982691 | -1.917475 | 0.609894  |
| C | -3.146040 | -2.402443 | -0.211874 |
| C | -0.825165 | 1.460373  | -0.827288 |
| C | -0.342671 | 0.936973  | 0.546398  |
| C | 0.135027  | -0.530956 | 0.541302  |
| C | -0.915824 | -1.428570 | -0.023957 |
| O | 0.123237  | 2.476275  | -1.231362 |
| C | 1.000182  | 2.772943  | -0.260359 |
| C | 0.738232  | 1.907963  | 0.913809  |
| O | 1.841161  | 3.622002  | -0.398082 |
| C | 1.402497  | 2.046113  | 2.052244  |
| C | -2.225699 | 2.075613  | -0.844802 |
| C | -2.197940 | -1.845677 | 2.088266  |
| O | -5.221958 | -1.714717 | -1.295819 |
| O | 1.306436  | -0.606310 | -0.293462 |
| C | 2.389240  | -1.240268 | 0.187285  |
| O | 2.448630  | -1.716037 | 1.293270  |
| C | 3.476578  | -1.312926 | -0.846781 |
| C | 4.889910  | -1.320738 | -0.269563 |
| C | 5.896336  | -1.663066 | -1.360748 |
| C | 5.227002  | 0.013169  | 0.385577  |
| H | -4.673654 | -1.045605 | 0.504819  |
| H | -2.930446 | -0.221532 | -1.889099 |
| H | -3.248234 | 1.703975  | 1.741550  |
| H | -4.709950 | 0.818300  | 1.276344  |
| H | -2.795162 | -2.731670 | -1.194879 |
| H | -3.663447 | -3.242106 | 0.259044  |
| H | -4.468390 | 2.488044  | 0.765992  |
| H | -1.160064 | 0.974903  | 1.266543  |
| H | 0.420147  | -0.801885 | 1.556386  |
| H | -0.870673 | -1.535618 | -1.103940 |
| H | 1.206683  | 1.419678  | 2.914517  |
| H | 2.172157  | 2.804134  | 2.141810  |
| H | -2.215494 | 2.978765  | -0.229542 |
| H | -0.756041 | 0.684762  | -1.587607 |
| H | -2.443860 | 2.393129  | -1.867622 |
| H | -2.497634 | -2.825868 | 2.470666  |
| H | -3.012118 | -1.157252 | 2.336604  |
| H | -1.309515 | -1.530216 | 2.634342  |
| H | -4.845096 | -1.893200 | -2.164416 |
| H | 3.291897  | -2.242416 | -1.398600 |
| H | 3.347129  | -0.497280 | -1.561378 |
| H | 4.930104  | -2.100636 | 0.496790  |

|   |          |           |           |
|---|----------|-----------|-----------|
| H | 6.912518 | -1.687408 | -0.960550 |
| H | 5.689895 | -2.639613 | -1.806156 |
| H | 5.875502 | -0.918804 | -2.162420 |
| H | 6.227542 | -0.010291 | 0.823737  |
| H | 4.522854 | 0.261458  | 1.182743  |
| H | 5.203978 | 0.825011  | -0.347538 |

mPW1PW91 energy = -1155.17454429 a.u.

(2*S*,6*R*,7*S*,8*R*)-1, Conf. J

|   |           |           |           |
|---|-----------|-----------|-----------|
| C | -4.063892 | -1.440309 | -0.440590 |
| C | -3.432043 | -0.195467 | -0.968310 |
| C | -3.324399 | 0.984008  | -0.354718 |
| C | -4.064097 | 1.381804  | 0.885753  |
| C | -1.848100 | -1.912694 | 0.666346  |
| C | -2.959320 | -2.496228 | -0.161856 |
| C | -0.896773 | 1.482697  | -0.834544 |
| C | -0.384547 | 1.026607  | 0.552640  |
| C | 0.186831  | -0.406824 | 0.581770  |
| C | -0.799722 | -1.385468 | 0.033045  |
| O | -0.012066 | 2.544303  | -1.264601 |
| C | 0.841214  | 2.921939  | -0.301047 |
| C | 0.630993  | 2.073981  | 0.896225  |
| O | 1.627505  | 3.818463  | -0.459945 |
| C | 1.280666  | 2.285716  | 2.031856  |
| C | -2.332097 | 2.009213  | -0.867063 |
| C | -2.095271 | -1.800445 | 2.137233  |
| O | -4.981220 | -1.937146 | -1.410541 |
| O | 1.366170  | -0.406265 | -0.244513 |
| C | 2.396727  | -1.177599 | 0.138497  |
| O | 2.396212  | -1.830916 | 1.151596  |
| C | 3.504968  | -1.142078 | -0.875036 |
| C | 4.893664  | -1.399430 | -0.296592 |
| C | 5.896674  | -1.614515 | -1.423156 |
| C | 5.332966  | -0.260411 | 0.615636  |
| H | -4.596997 | -1.233501 | 0.491023  |
| H | -2.872823 | -0.345187 | -1.890093 |
| H | -3.378360 | 1.590910  | 1.712845  |
| H | -4.606583 | 2.314864  | 0.701530  |
| H | -2.575640 | -2.823544 | -1.131070 |
| H | -3.421283 | -3.359636 | 0.328657  |
| H | -4.787612 | 0.638972  | 1.217267  |
| H | -1.203673 | 1.034044  | 1.271859  |
| H | 0.483674  | -0.639529 | 1.603505  |
| H | -0.728845 | -1.528089 | -1.041390 |
| H | 1.121598  | 1.673074  | 2.911532  |
| H | 1.999984  | 3.093614  | 2.101844  |
| H | -2.382948 | 2.916098  | -0.258945 |
| H | -0.781498 | 0.693307  | -1.574613 |
| H | -2.560801 | 2.304863  | -1.894164 |
| H | -1.234312 | -1.419460 | 2.685667  |
| H | -2.349015 | -2.781018 | 2.550833  |
| H | -2.948177 | -1.146955 | 2.347203  |
| H | -5.328753 | -2.777600 | -1.093850 |
| H | 3.254389  | -1.916059 | -1.610087 |
| H | 3.469183  | -0.189257 | -1.407825 |
| H | 4.839584  | -2.315995 | 0.298577  |

|   |          |           |           |
|---|----------|-----------|-----------|
| H | 6.893144 | -1.817264 | -1.023812 |
| H | 5.613675 | -2.458064 | -2.058046 |
| H | 5.970354 | -0.727723 | -2.059799 |
| H | 6.315997 | -0.463487 | 1.047021  |
| H | 4.634710 | -0.111567 | 1.442034  |
| H | 5.401568 | 0.679696  | 0.059785  |

mPW1PW91 energy = -1155.17445747 a.u.

(2S,6R,7S,8R)-1, Conf. K

|   |           |           |           |
|---|-----------|-----------|-----------|
| C | -3.754735 | -1.841903 | -0.458388 |
| C | -3.271926 | -0.556075 | -1.041334 |
| C | -3.349180 | 0.660539  | -0.499678 |
| C | -4.186053 | 1.024961  | 0.687987  |
| C | -1.566277 | -1.915919 | 0.794747  |
| C | -2.532696 | -2.706786 | -0.043255 |
| C | -0.992972 | 1.466549  | -0.897351 |
| C | -0.504748 | 1.181235  | 0.542544  |
| C | 0.251024  | -0.153853 | 0.708771  |
| C | -0.559862 | -1.292432 | 0.181468  |
| O | -0.240912 | 2.612744  | -1.361730 |
| C | 0.492592  | 3.172296  | -0.388049 |
| C | 0.337458  | 2.380870  | 0.855539  |
| O | 1.148949  | 4.163480  | -0.572335 |
| C | 0.887562  | 2.755324  | 2.001685  |
| C | -2.482711 | 1.779659  | -1.040982 |
| C | -1.921995 | -1.739387 | 2.236592  |
| O | -4.528957 | -2.528003 | -1.437924 |
| O | 1.470138  | -0.054975 | -0.051736 |
| C | 2.596580  | -0.533005 | 0.501214  |
| O | 2.636960  | -1.047121 | 1.590972  |
| C | 3.781772  | -0.299243 | -0.392137 |
| C | 4.890595  | -1.337495 | -0.240235 |
| C | 4.438019  | -2.706907 | -0.732441 |
| C | 6.142829  | -0.876904 | -0.975311 |
| H | -4.371847 | -1.655370 | 0.424411  |
| H | -2.660347 | -0.682278 | -1.933239 |
| H | -3.570199 | 1.379756  | 1.520610  |
| H | -4.811057 | 0.208791  | 1.045912  |
| H | -2.048531 | -3.042747 | -0.963279 |
| H | -2.899357 | -3.590837 | 0.488582  |
| H | -4.845278 | 1.858582  | 0.424242  |
| H | -1.356557 | 1.121256  | 1.220221  |
| H | 0.511464  | -0.275766 | 1.758937  |
| H | -0.399417 | -1.496059 | -0.873355 |
| H | 0.767839  | 2.183849  | 2.914657  |
| H | 1.481935  | 3.660715  | 2.046697  |
| H | -2.694644 | 2.709362  | -0.506755 |
| H | -0.725734 | 0.653001  | -1.568678 |
| H | -2.688805 | 1.966742  | -2.098037 |
| H | -2.041006 | -2.715876 | 2.715927  |
| H | -2.881033 | -1.223295 | 2.345614  |
| H | -1.172379 | -1.181382 | 2.796870  |
| H | -4.759192 | -3.394317 | -1.085693 |
| H | 3.441511  | -0.233062 | -1.427935 |
| H | 4.158964  | 0.695429  | -0.127415 |
| H | 5.123873  | -1.417049 | 0.825673  |

|   |          |           |           |
|---|----------|-----------|-----------|
| H | 5.225851 | -3.450988 | -0.593389 |
| H | 3.554912 | -3.057901 | -0.194023 |
| H | 4.194448 | -2.678450 | -1.798987 |
| H | 6.951019 | -1.603239 | -0.861703 |
| H | 6.500907 | 0.083448  | -0.595769 |
| H | 5.951589 | -0.760456 | -2.046376 |

mPW1PW91 energy = -1155.17441707 a.u.

(2S,6R,7S,8R)-1, Conf. L

|   |           |           |           |
|---|-----------|-----------|-----------|
| C | -4.181153 | -1.245225 | -0.450335 |
| C | -3.472097 | -0.038571 | -0.967408 |
| C | -3.265419 | 1.115967  | -0.332126 |
| C | -3.944321 | 1.536578  | 0.935108  |
| C | -1.989832 | -1.908072 | 0.608762  |
| C | -3.151520 | -2.385103 | -0.219555 |
| C | -0.815409 | 1.462462  | -0.826225 |
| C | -0.336588 | 0.937679  | 0.548293  |
| C | 0.134798  | -0.531984 | 0.542592  |
| C | -0.920980 | -1.422705 | -0.024319 |
| O | 0.135570  | 2.477549  | -1.227254 |
| C | 1.012134  | 2.770644  | -0.255304 |
| C | 0.747106  | 1.904744  | 0.917609  |
| O | 1.855344  | 3.618018  | -0.390560 |
| C | 1.410724  | 2.039614  | 2.056794  |
| C | -2.214987 | 2.079259  | -0.847215 |
| C | -2.204597 | -1.840138 | 2.087388  |
| O | -5.153716 | -1.650737 | -1.409036 |
| O | 1.305579  | -0.610412 | -0.292589 |
| C | 2.382622  | -1.258202 | 0.181771  |
| O | 2.437227  | -1.746824 | 1.282553  |
| C | 3.471343  | -1.326666 | -0.851155 |
| C | 4.883981  | -1.325572 | -0.271576 |
| C | 5.894614  | -1.654795 | -1.362938 |
| C | 5.209132  | 0.008372  | 0.389550  |
| H | -4.677820 | -1.020414 | 0.497230  |
| H | -2.951541 | -0.206466 | -1.908718 |
| H | -3.225149 | 1.697627  | 1.744423  |
| H | -4.697182 | 0.829593  | 1.279413  |
| H | -2.805568 | -2.710228 | -1.203680 |
| H | -3.667459 | -3.227343 | 0.253350  |
| H | -4.440135 | 2.500154  | 0.777516  |
| H | -1.154747 | 0.978249  | 1.267352  |
| H | 0.418826  | -0.805827 | 1.557261  |
| H | -0.878177 | -1.526309 | -1.104611 |
| H | 1.212410  | 1.412512  | 2.918036  |
| H | 2.182458  | 2.795317  | 2.148076  |
| H | -2.204522 | 2.984429  | -0.234874 |
| H | -0.746012 | 0.687320  | -1.586940 |
| H | -2.431576 | 2.392669  | -1.871541 |
| H | -2.511369 | -2.819400 | 2.466888  |
| H | -3.012918 | -1.145698 | 2.338226  |
| H | -1.313573 | -1.533791 | 2.634496  |
| H | -5.562055 | -2.465571 | -1.097980 |
| H | 3.293081  | -2.258075 | -1.401705 |
| H | 3.338856  | -0.512521 | -1.566809 |
| H | 4.929562  | -2.108297 | 0.491613  |

|   |          |           |           |
|---|----------|-----------|-----------|
| H | 6.910379 | -1.673213 | -0.961332 |
| H | 5.696462 | -2.630600 | -1.813684 |
| H | 5.869122 | -0.906657 | -2.160843 |
| H | 6.209842 | -0.008021 | 0.827644  |
| H | 4.502787 | 0.246748  | 1.187830  |
| H | 5.178686 | 0.823331  | -0.339801 |

mPW1PW91 energy = -1155.17435292 a.u.

(2*S*,6*R*,7*S*,8*R*)-1, Conf. M

|   |           |           |           |
|---|-----------|-----------|-----------|
| C | -3.719231 | -1.605504 | -0.473093 |
| C | -3.056123 | -0.432175 | -1.122588 |
| C | -3.092957 | 0.844795  | -0.738480 |
| C | -4.035181 | 1.409050  | 0.280002  |
| C | -1.678964 | -1.731224 | 0.996334  |
| C | -2.633804 | -2.525521 | 0.148001  |
| C | -0.639915 | 1.401909  | -0.955424 |
| C | -0.323372 | 1.232482  | 0.549441  |
| C | 0.284692  | -0.135768 | 0.928649  |
| C | -0.566235 | -1.258629 | 0.432938  |
| O | 0.257712  | 2.424959  | -1.447295 |
| C | 0.943045  | 3.021985  | -0.460418 |
| C | 0.598605  | 2.380069  | 0.830141  |
| O | 1.704529  | 3.929304  | -0.670480 |
| C | 1.087451  | 2.811031  | 1.984195  |
| C | -2.072760 | 1.823761  | -1.284497 |
| C | -2.152539 | -1.373284 | 2.369014  |
| O | -4.545160 | -2.351171 | -1.361117 |
| O | 1.580159  | -0.215382 | 0.304824  |
| C | 2.610645  | -0.658653 | 1.042892  |
| O | 2.506778  | -0.996655 | 2.196251  |
| C | 3.890325  | -0.653392 | 0.257059  |
| C | 3.853899  | -1.492615 | -1.026179 |
| C | 5.168516  | -1.338127 | -1.780127 |
| C | 3.561792  | -2.957970 | -0.727085 |
| H | -4.393947 | -1.275648 | 0.315718  |
| H | -2.345245 | -0.704852 | -1.902502 |
| H | -3.498481 | 1.824596  | 1.138643  |
| H | -4.588288 | 2.244064  | -0.162361 |
| H | -2.091954 | -3.000287 | -0.675800 |
| H | -3.137319 | -3.311405 | 0.716599  |
| H | -4.763897 | 0.687055  | 0.644764  |
| H | -1.240355 | 1.321580  | 1.132058  |
| H | 0.424411  | -0.163540 | 2.008144  |
| H | -0.324839 | -1.584714 | -0.574603 |
| H | 0.835968  | 2.343054  | 2.928710  |
| H | 1.765307  | 3.656704  | 2.003641  |
| H | -2.245807 | 2.817577  | -0.863930 |
| H | -0.386721 | 0.502365  | -1.512961 |
| H | -2.156601 | 1.922005  | -2.369931 |
| H | -1.417101 | -0.809931 | 2.942145  |
| H | -2.392675 | -2.281248 | 2.930469  |
| H | -3.074849 | -0.785448 | 2.327514  |
| H | -4.001851 | -2.656010 | -2.096018 |
| H | 4.108758  | 0.388258  | 0.002986  |
| H | 4.678180  | -1.008417 | 0.922725  |
| H | 3.050432  | -1.100730 | -1.656906 |

|   |          |           |           |
|---|----------|-----------|-----------|
| H | 5.150410 | -1.902195 | -2.715714 |
| H | 5.370270 | -0.292286 | -2.024423 |
| H | 6.008091 | -1.710617 | -1.185760 |
| H | 3.520771 | -3.541569 | -1.649753 |
| H | 2.606590 | -3.089077 | -0.212348 |
| H | 4.341282 | -3.391038 | -0.093225 |

mPW1PW91 energy = -1155.17429010 a.u.

(2*S*,6*R*,7*S*,8*R*)-1, Conf. N

|   |           |           |           |
|---|-----------|-----------|-----------|
| C | -3.720064 | -1.594177 | -0.484368 |
| C | -3.060236 | -0.424828 | -1.134654 |
| C | -3.088634 | 0.847875  | -0.736697 |
| C | -4.023226 | 1.410258  | 0.290147  |
| C | -1.681279 | -1.722682 | 0.993877  |
| C | -2.632708 | -2.512886 | 0.138433  |
| C | -0.635827 | 1.407623  | -0.953828 |
| C | -0.317638 | 1.238779  | 0.550831  |
| C | 0.286002  | -0.131127 | 0.929848  |
| C | -0.568411 | -1.249806 | 0.431202  |
| O | 0.260512  | 2.431918  | -1.446251 |
| C | 0.949686  | 3.026390  | -0.460954 |
| C | 0.607872  | 2.383771  | 0.830015  |
| O | 1.712133  | 3.932851  | -0.671752 |
| C | 1.100205  | 2.812811  | 1.983276  |
| C | -2.069006 | 1.827577  | -1.282479 |
| C | -2.153677 | -1.370605 | 2.368447  |
| O | -4.461280 | -2.310533 | -1.467614 |
| O | 1.581664  | -0.214192 | 0.306964  |
| C | 2.608586  | -0.667801 | 1.043262  |
| O | 2.501735  | -1.011020 | 2.194933  |
| C | 3.888562  | -0.667208 | 0.258018  |
| C | 3.847453  | -1.502637 | -1.027649 |
| C | 5.163608  | -1.354786 | -1.780280 |
| C | 3.545192  | -2.966884 | -0.733334 |
| H | -4.395514 | -1.260048 | 0.307469  |
| H | -2.363982 | -0.699407 | -1.925068 |
| H | -4.759410 | 0.691720  | 0.646667  |
| H | -4.566812 | 2.256991  | -0.141541 |
| H | -2.096087 | -2.982057 | -0.689492 |
| H | -3.131759 | -3.302432 | 0.710011  |
| H | -3.481943 | 1.808884  | 1.153910  |
| H | -1.233326 | 1.331319  | 1.134863  |
| H | 0.424823  | -0.160549 | 2.009442  |
| H | -0.329804 | -1.572502 | -0.577934 |
| H | 0.850024  | 2.344443  | 2.927969  |
| H | 1.779873  | 3.657041  | 2.001921  |
| H | -2.243107 | 2.821608  | -0.862779 |
| H | -0.382701 | 0.508417  | -1.511815 |
| H | -2.152988 | 1.923810  | -2.368010 |
| H | -1.416171 | -0.812761 | 2.944406  |
| H | -2.396141 | -2.280572 | 2.925847  |
| H | -3.073890 | -0.779195 | 2.330303  |
| H | -4.827550 | -3.098801 | -1.052939 |
| H | 4.112827  | 0.373850  | 0.006683  |
| H | 4.674158  | -1.028585 | 0.922934  |
| H | 3.047151  | -1.103647 | -1.657864 |

|   |          |           |           |
|---|----------|-----------|-----------|
| H | 5.142285 | -1.916349 | -2.717294 |
| H | 5.372197 | -0.309673 | -2.021966 |
| H | 6.000426 | -1.734235 | -1.186387 |
| H | 3.500765 | -3.547009 | -1.657993 |
| H | 2.588574 | -3.093122 | -0.220065 |
| H | 4.321205 | -3.407289 | -0.100208 |

mPW1PW91 energy = -1155.17410107 a.u.

(2*S*,6*R*,7*S*,8*R*)-1, Conf. O

|   |           |           |           |
|---|-----------|-----------|-----------|
| C | -4.162491 | -0.959616 | -0.530752 |
| C | -3.323473 | 0.185191  | -1.004754 |
| C | -3.065298 | 1.328899  | -0.367959 |
| C | -3.788707 | 1.816879  | 0.849070  |
| C | -2.076322 | -1.799763 | 0.606918  |
| C | -3.247850 | -2.182913 | -0.255126 |
| C | -0.573364 | 1.451329  | -0.755381 |
| C | -0.193315 | 0.877704  | 0.629539  |
| C | 0.166350  | -0.622639 | 0.618152  |
| C | -0.942397 | -1.424087 | 0.015032  |
| O | 0.481397  | 2.374856  | -1.114546 |
| C | 1.333061  | 2.596769  | -0.101621 |
| C | 0.940086  | 1.759989  | 1.056934  |
| O | 2.247818  | 3.372226  | -0.195140 |
| C | 1.539401  | 1.859044  | 2.234758  |
| C | -1.907272 | 2.196855  | -0.818614 |
| C | -2.337660 | -1.697352 | 2.075760  |
| O | -5.196154 | -1.318259 | -1.441910 |
| O | 1.356200  | -0.760986 | -0.180701 |
| C | 2.162760  | -1.799543 | 0.092133  |
| O | 1.943670  | -2.589588 | 0.976927  |
| C | 3.343531  | -1.840243 | -0.833578 |
| C | 4.317038  | -0.665014 | -0.657941 |
| C | 4.872982  | -0.600483 | 0.758917  |
| C | 5.440713  | -0.779290 | -1.680125 |
| H | -4.686879 | -0.696521 | 0.386988  |
| H | -2.747221 | -0.033936 | -1.904016 |
| H | -3.114636 | 1.912989  | 1.706163  |
| H | -4.627690 | 1.186109  | 1.138034  |
| H | -2.892818 | -2.552278 | -1.222213 |
| H | -3.856215 | -2.967814 | 0.201015  |
| H | -4.179901 | 2.821954  | 0.659706  |
| H | -1.035095 | 0.969731  | 1.315725  |
| H | 0.397509  | -0.931471 | 1.637499  |
| H | -0.862896 | -1.544171 | -1.061694 |
| H | 1.240647  | 1.258621  | 3.086232  |
| H | 2.358124  | 2.556321  | 2.370915  |
| H | -1.838205 | 3.085151  | -0.185735 |
| H | -0.551111 | 0.675835  | -1.518431 |
| H | -2.049907 | 2.550687  | -1.843015 |
| H | -2.722897 | -2.649330 | 2.453260  |
| H | -3.105237 | -0.947463 | 2.291777  |
| H | -1.446923 | -1.445836 | 2.650411  |
| H | -4.789789 | -1.542268 | -2.286324 |
| H | 3.859860  | -2.784630 | -0.655874 |
| H | 2.965564  | -1.844441 | -1.859586 |
| H | 3.766538  | 0.259541  | -0.856256 |

|   |          |           |           |
|---|----------|-----------|-----------|
| H | 5.559821 | 0.242327  | 0.864663  |
| H | 4.084348 | -0.474948 | 1.504684  |
| H | 5.422965 | -1.513208 | 1.006874  |
| H | 6.134718 | 0.059673  | -1.591989 |
| H | 5.054681 | -0.786747 | -2.702378 |
| H | 6.012546 | -1.700152 | -1.531644 |

mPW1PW91 energy = -1155.17403553 a.u.

(2*S*,6*R*,7*S*,8*R*)-1, Conf. P

|   |           |           |           |
|---|-----------|-----------|-----------|
| C | -4.164484 | -0.950180 | -0.537730 |
| C | -3.333070 | 0.194886  | -1.011207 |
| C | -3.064856 | 1.327833  | -0.360075 |
| C | -3.776730 | 1.805898  | 0.868005  |
| C | -2.075850 | -1.794402 | 0.598971  |
| C | -3.243367 | -2.172322 | -0.270442 |
| C | -0.574146 | 1.456322  | -0.754414 |
| C | -0.188939 | 0.881527  | 0.628669  |
| C | 0.167932  | -0.619251 | 0.616033  |
| C | -0.941934 | -1.415887 | 0.009011  |
| O | 0.477860  | 2.382926  | -1.114817 |
| C | 1.333514  | 2.602769  | -0.105322 |
| C | 0.946334  | 1.762820  | 1.053012  |
| O | 2.247465  | 3.379148  | -0.200387 |
| C | 1.551309  | 1.859138  | 2.228139  |
| C | -1.909831 | 2.198819  | -0.812572 |
| C | -2.337416 | -1.702005 | 2.068479  |
| O | -5.122560 | -1.269482 | -1.542421 |
| O | 1.358793  | -0.760133 | -0.180648 |
| C | 2.161678  | -1.801165 | 0.092754  |
| O | 1.939669  | -2.590370 | 0.977733  |
| C | 3.342731  | -1.846067 | -0.832291 |
| C | 4.319485  | -0.673416 | -0.657276 |
| C | 4.874880  | -0.609056 | 0.759787  |
| C | 5.443245  | -0.791931 | -1.678861 |
| H | -4.683650 | -0.689059 | 0.388419  |
| H | -2.777030 | -0.016588 | -1.923188 |
| H | -4.620497 | 1.179106  | 1.151867  |
| H | -4.158438 | 2.817366  | 0.694127  |
| H | -2.891271 | -2.527948 | -1.241719 |
| H | -3.844410 | -2.966883 | 0.183583  |
| H | -3.098876 | 1.883366  | 1.724010  |
| H | -1.028222 | 0.974033  | 1.317703  |
| H | 0.396226  | -0.930167 | 1.635399  |
| H | -0.863745 | -1.529245 | -1.068446 |
| H | 1.257002  | 1.256476  | 3.079586  |
| H | 2.370445  | 2.556390  | 2.361928  |
| H | -1.840910 | 3.086887  | -0.179296 |
| H | -0.553116 | 0.682720  | -1.519257 |
| H | -2.056605 | 2.551952  | -1.836525 |
| H | -2.722384 | -2.656576 | 2.440023  |
| H | -3.104472 | -0.953118 | 2.289825  |
| H | -1.446500 | -1.454807 | 2.644754  |
| H | -5.601252 | -2.057162 | -1.263153 |
| H | 3.856325  | -2.791727 | -0.653422 |
| H | 2.965113  | -1.850090 | -1.858397 |
| H | 3.771637  | 0.252443  | -0.856787 |

|   |          |           |           |
|---|----------|-----------|-----------|
| H | 5.564632 | 0.231471  | 0.864876  |
| H | 4.086270 | -0.479709 | 1.504962  |
| H | 5.421502 | -1.523386 | 1.009292  |
| H | 6.139376 | 0.045382  | -1.591693 |
| H | 5.057440 | -0.799753 | -2.701175 |
| H | 6.012689 | -1.714069 | -1.529002 |

mPW1PW91 energy = -1155.17385397 a.u.

(2R,6R,7S,8R)-1, Conf. A

|   |           |           |           |
|---|-----------|-----------|-----------|
| C | -4.011861 | -1.585792 | -0.307197 |
| C | -3.592098 | -0.144955 | -0.286979 |
| C | -3.051266 | 0.560570  | -1.279807 |
| C | -2.927484 | 0.069803  | -2.688870 |
| C | -1.690864 | -1.940944 | 0.666153  |
| C | -2.788426 | -2.534462 | -0.172303 |
| C | -0.880614 | 1.701801  | -0.741222 |
| C | -0.482028 | 1.152281  | 0.650500  |
| C | 0.176274  | -0.240028 | 0.648778  |
| C | -0.735967 | -1.249528 | 0.040637  |
| O | -0.257944 | 3.004094  | -0.858027 |
| C | 0.476316  | 3.328157  | 0.215638  |
| C | 0.398352  | 2.232330  | 1.207498  |
| O | 1.075123  | 4.369235  | 0.287421  |
| C | 1.042416  | 2.287532  | 2.364438  |
| C | -2.382484 | 1.878246  | -0.984589 |
| C | -1.863249 | -2.004398 | 2.150030  |
| O | -4.894012 | -1.871992 | 0.775731  |
| O | 1.384581  | -0.148609 | -0.131858 |
| C | 2.519525  | -0.634957 | 0.395999  |
| O | 2.578990  | -1.173285 | 1.472915  |
| C | 3.690729  | -0.374107 | -0.508695 |
| C | 4.821402  | -1.390673 | -0.376981 |
| C | 4.393381  | -2.762492 | -0.883871 |
| C | 6.059552  | -0.895349 | -1.113405 |
| H | -4.511860 | -1.836677 | -1.248730 |
| H | -3.613581 | 0.301780  | 0.704891  |
| H | -3.359908 | 0.796804  | -3.383298 |
| H | -3.421419 | -0.887800 | -2.848904 |
| H | -2.410223 | -2.723219 | -1.178631 |
| H | -3.155127 | -3.481898 | 0.230939  |
| H | -1.877719 | -0.044024 | -2.979244 |
| H | -1.380806 | 1.052049  | 1.263312  |
| H | 0.447775  | -0.493936 | 1.671744  |
| H | -0.719012 | -1.266985 | -1.045813 |
| H | 0.993179  | 1.487469  | 3.093648  |
| H | 1.646940  | 3.154472  | 2.605123  |
| H | -2.827232 | 2.356338  | -0.108424 |
| H | -0.442278 | 1.100391  | -1.537988 |
| H | -2.496750 | 2.561655  | -1.830461 |
| H | -2.750030 | -1.444684 | 2.463098  |
| H | -1.001762 | -1.621939 | 2.696763  |
| H | -2.032051 | -3.038109 | 2.464519  |
| H | -5.665582 | -1.302491 | 0.689712  |
| H | 3.337577  | -0.307075 | -1.540286 |
| H | 4.050312  | 0.626393  | -0.240975 |

|   |          |           |           |
|---|----------|-----------|-----------|
| H | 5.063059 | -1.478921 | 0.686370  |
| H | 5.195356 | -3.493356 | -0.756134 |
| H | 3.518613 | -3.135958 | -0.347028 |
| H | 4.145896 | -2.725879 | -1.949318 |
| H | 6.882772 | -1.606726 | -1.014566 |
| H | 6.400799 | 0.066625  | -0.722615 |
| H | 5.859527 | -0.768044 | -2.181681 |

mPW1PW91 energy = -1155.17539035 a.u.

(2R,6R,7S,8R)-1, Conf. B

|   |           |           |           |
|---|-----------|-----------|-----------|
| C | -4.282030 | -1.159320 | -0.281160 |
| C | -3.664940 | 0.203586  | -0.160014 |
| C | -3.078634 | 0.919806  | -1.118946 |
| C | -3.094138 | 0.549522  | -2.569808 |
| C | -1.982510 | -1.914930 | 0.494778  |
| C | -3.198274 | -2.272839 | -0.313347 |
| C | -0.746675 | 1.719073  | -0.623862 |
| C | -0.350718 | 0.978233  | 0.677109  |
| C | 0.098163  | -0.482846 | 0.499211  |
| C | -0.981604 | -1.293326 | -0.131840 |
| O | 0.031134  | 2.941127  | -0.648563 |
| C | 0.872078  | 3.043114  | 0.391194  |
| C | 0.708882  | 1.861329  | 1.266766  |
| O | 1.612805  | 3.982135  | 0.521510  |
| C | 1.435063  | 1.694908  | 2.362922  |
| C | -2.222848 | 2.105246  | -0.752522 |
| C | -2.074482 | -2.108055 | 1.974506  |
| O | -5.137714 | -1.429633 | 0.826777  |
| O | 1.262899  | -0.477209 | -0.350103 |
| C | 2.308020  | -1.240223 | 0.009556  |
| O | 2.336085  | -1.902485 | 1.016413  |
| C | 3.396094  | -1.188157 | -1.025453 |
| C | 4.797449  | -1.438451 | -0.475091 |
| C | 5.780304  | -1.644617 | -1.620964 |
| C | 5.247471  | -0.300136 | 0.432630  |
| H | -4.860821 | -1.246924 | -1.206664 |
| H | -3.576419 | 0.554270  | 0.866292  |
| H | -3.742650 | -0.299603 | -2.782442 |
| H | -2.090040 | 0.298704  | -2.928023 |
| H | -2.909009 | -2.414628 | -1.356159 |
| H | -3.670890 | -3.195743 | 0.031779  |
| H | -3.433034 | 1.396306  | -3.174434 |
| H | -1.216536 | 0.941788  | 1.342609  |
| H | 0.388648  | -0.874042 | 1.472023  |
| H | -1.033402 | -1.201894 | -1.213334 |
| H | 1.322338  | 0.829248  | 3.004868  |
| H | 2.172633  | 2.438794  | 2.641094  |
| H | -2.551885 | 2.549490  | 0.190021  |
| H | -0.429075 | 1.157063  | -1.502265 |
| H | -2.290481 | 2.875768  | -1.525383 |
| H | -2.878974 | -1.497825 | 2.396261  |
| H | -1.149020 | -1.867847 | 2.497250  |
| H | -2.331680 | -3.146733 | 2.201578  |
| H | -5.818682 | -0.749211 | 0.850298  |
| H | 3.137603  | -1.959468 | -1.760544 |
| H | 3.342661  | -0.232060 | -1.550893 |

|   |          |           |           |
|---|----------|-----------|-----------|
| H | 4.759644 | -2.357099 | 0.118012  |
| H | 6.785868 | -1.839704 | -1.241078 |
| H | 5.492002 | -2.489942 | -2.251113 |
| H | 5.835296 | -0.756813 | -2.258259 |
| H | 6.237714 | -0.501384 | 0.847966  |
| H | 4.561596 | -0.155134 | 1.269976  |
| H | 5.304901 | 0.641637  | -0.121714 |

mPW1PW91 energy = -1155.17535609 a.u.

(2R,6R,7S,8R)-1, Conf. C

|   |           |           |           |
|---|-----------|-----------|-----------|
| C | 4.297685  | -1.128489 | 0.257893  |
| C | 3.676677  | 0.229234  | 0.149228  |
| C | 3.077921  | 0.927554  | 1.112184  |
| C | 3.090654  | 0.543045  | 2.559443  |
| C | 1.987389  | -1.914644 | -0.462450 |
| C | 3.209880  | -2.245131 | 0.345149  |
| C | 0.743795  | 1.724700  | 0.626744  |
| C | 0.350581  | 0.977239  | -0.671071 |
| C | -0.094048 | -0.484210 | -0.485953 |
| C | 0.987009  | -1.283759 | 0.156166  |
| O | -0.037005 | 2.945102  | 0.645416  |
| C | -0.877541 | 3.040099  | -0.395054 |
| C | -0.710327 | 1.855134  | -1.265823 |
| O | -1.621357 | 3.976129  | -0.529896 |
| C | -1.433867 | 1.683349  | -2.362886 |
| C | 2.219107  | 2.113166  | 0.753870  |
| C | 2.072871  | -2.134568 | -1.939097 |
| O | 5.127198  | -1.283081 | -0.888933 |
| O | -1.263151 | -0.477709 | 0.357727  |
| C | -2.303011 | -1.247388 | -0.001935 |
| O | -2.322523 | -1.918191 | -1.003499 |
| C | -3.398103 | -1.191427 | 1.025511  |
| C | -4.796112 | -1.438763 | 0.464985  |
| C | -5.788432 | -1.639544 | 1.603594  |
| C | -5.235433 | -0.300725 | -0.448365 |
| H | 4.913717  | -1.206584 | 1.160506  |
| H | 3.605798  | 0.593655  | -0.872679 |
| H | 2.090364  | 0.267970  | 2.910601  |
| H | 3.410133  | 1.390535  | 3.173559  |
| H | 2.934538  | -2.349119 | 1.396812  |
| H | 3.670036  | -3.188247 | 0.033154  |
| H | 3.757001  | -0.293522 | 2.767185  |
| H | 1.217270  | 0.939518  | -1.335341 |
| H | -0.377759 | -0.883044 | -1.457677 |
| H | 1.043064  | -1.170947 | 1.235313  |
| H | -1.317665 | 0.815893  | -3.001761 |
| H | -2.172383 | 2.424746  | -2.645144 |
| H | 2.545402  | 2.561815  | -0.187480 |
| H | 0.426639  | 1.166185  | 1.507595  |
| H | 2.287382  | 2.880601  | 1.529790  |
| H | 2.352566  | -3.171080 | -2.149661 |
| H | 2.857194  | -1.510973 | -2.379158 |
| H | 1.136654  | -1.928345 | -2.457155 |
| H | 5.549181  | -2.146394 | -0.839376 |
| H | -3.147042 | -1.962846 | 1.763059  |
| H | -3.346368 | -0.234885 | 1.550201  |

|   |           |           |           |
|---|-----------|-----------|-----------|
| H | -4.756559 | -2.358691 | -0.126030 |
| H | -6.791403 | -1.833182 | 1.216196  |
| H | -5.507166 | -2.483928 | 2.238159  |
| H | -5.846269 | -0.749918 | 2.238053  |
| H | -6.223246 | -0.499187 | -0.870798 |
| H | -4.542922 | -0.159581 | -1.280912 |
| H | -5.293612 | 0.642335  | 0.103684  |

mPW1PW91 energy = -1155.17510394 a.u.

(2R,6R,7S,8R)-1, Conf. D

|   |           |           |           |
|---|-----------|-----------|-----------|
| C | -4.026202 | -1.569969 | -0.293126 |
| C | -3.609261 | -0.132116 | -0.287753 |
| C | -3.045203 | 0.552837  | -1.280727 |
| C | -2.899759 | 0.039797  | -2.679946 |
| C | -1.689785 | -1.938606 | 0.646115  |
| C | -2.790072 | -2.518629 | -0.195845 |
| C | -0.880743 | 1.707662  | -0.748002 |
| C | -0.484699 | 1.158091  | 0.644170  |
| C | 0.173863  | -0.233953 | 0.642315  |
| C | -0.736192 | -1.240191 | 0.026134  |
| O | -0.264488 | 3.013552  | -0.860236 |
| C | 0.468158  | 3.337190  | 0.214449  |
| C | 0.393460  | 2.238545  | 1.203651  |
| O | 1.063753  | 4.379956  | 0.289337  |
| C | 1.037727  | 2.292643  | 2.360507  |
| C | -2.382331 | 1.875752  | -0.996839 |
| C | -1.859906 | -2.014331 | 2.129961  |
| O | -4.910268 | -1.737017 | 0.810246  |
| O | 1.386112  | -0.141323 | -0.132311 |
| C | 2.516618  | -0.635422 | 0.397444  |
| O | 2.569487  | -1.179255 | 1.472026  |
| C | 3.692356  | -0.376297 | -0.501857 |
| C | 4.820432  | -1.395160 | -0.366069 |
| C | 4.391516  | -2.766293 | -0.874088 |
| C | 6.062036  | -0.902543 | -1.098465 |
| H | -4.555704 | -1.821949 | -1.218567 |
| H | -3.663272 | 0.332322  | 0.693854  |
| H | -1.846567 | -0.068088 | -2.959614 |
| H | -3.333572 | 0.751055  | -3.389774 |
| H | -2.423089 | -2.681220 | -1.211574 |
| H | -3.137229 | -3.484366 | 0.185789  |
| H | -3.384447 | -0.924228 | -2.829503 |
| H | -1.385121 | 1.056710  | 1.254520  |
| H | 0.440007  | -0.490962 | 1.665922  |
| H | -0.721032 | -1.246725 | -1.060326 |
| H | 0.990519  | 1.490886  | 3.087990  |
| H | 1.639919  | 3.160669  | 2.603132  |
| H | -2.831283 | 2.359844  | -0.126205 |
| H | -0.435180 | 1.109973  | -1.543646 |
| H | -2.497156 | 2.551151  | -1.849171 |
| H | -2.044168 | -3.048187 | 2.435766  |
| H | -2.734936 | -1.440989 | 2.451452  |
| H | -0.989878 | -1.652618 | 2.677191  |
| H | -5.218337 | -2.648528 | 0.812019  |
| H | 3.343640  | -0.307967 | -1.534896 |
| H | 4.052765  | 0.623388  | -0.232302 |

|   |          |           |           |
|---|----------|-----------|-----------|
| H | 5.058344 | -1.483674 | 0.698105  |
| H | 5.191821 | -3.498541 | -0.743723 |
| H | 3.514440 | -3.138020 | -0.339830 |
| H | 4.147483 | -2.729467 | -1.940325 |
| H | 6.883425 | -1.615646 | -0.996822 |
| H | 6.403992 | 0.058782  | -0.706727 |
| H | 5.865757 | -0.774972 | -2.167400 |

mPW1PW91 energy = -1155.17508970 a.u.

(2R,6R,7S,8R)-1, Conf. E

|   |           |           |           |
|---|-----------|-----------|-----------|
| C | 3.912115  | -1.362710 | 0.363879  |
| C | 3.384750  | 0.035828  | 0.498124  |
| C | 2.685539  | 0.551257  | 1.508700  |
| C | 2.453374  | -0.144063 | 2.814103  |
| C | 1.753674  | -1.698600 | -0.936039 |
| C | 2.792100  | -2.350191 | -0.066256 |
| C | 0.510134  | 1.638854  | 0.876252  |
| C | 0.311818  | 1.281660  | -0.617527 |
| C | -0.226448 | -0.132690 | -0.896590 |
| C | 0.687448  | -1.166839 | -0.334657 |
| O | -0.211784 | 2.874596  | 1.097969  |
| C | -0.848136 | 3.309535  | 0.001047  |
| C | -0.591307 | 2.371960  | -1.114808 |
| O | -1.508243 | 4.315439  | 0.004325  |
| C | -1.136191 | 2.539900  | -2.311238 |
| C | 1.957717  | 1.858031  | 1.325405  |
| C | 2.093999  | -1.520964 | -2.381360 |
| O | 4.938367  | -1.426426 | -0.623574 |
| O | -1.521543 | -0.232557 | -0.272626 |
| C | -2.525067 | -0.768768 | -0.985114 |
| O | -2.401745 | -1.164822 | -2.117900 |
| C | -3.803154 | -0.793246 | -0.197196 |
| C | -3.735018 | -1.627607 | 1.088958  |
| C | -5.052971 | -1.516486 | 1.844939  |
| C | -3.392109 | -3.083067 | 0.795720  |
| H | 4.312575  | -1.725539 | 1.316045  |
| H | 3.476796  | 0.625326  | -0.412119 |
| H | 2.983824  | -1.092241 | 2.890510  |
| H | 1.388814  | -0.342375 | 2.976952  |
| H | 2.316969  | -2.719736 | 0.844314  |
| H | 3.277001  | -3.196691 | -0.558995 |
| H | 2.775346  | 0.493283  | 3.643716  |
| H | 1.276898  | 1.335965  | -1.127157 |
| H | -0.357597 | -0.242955 | -1.971143 |
| H | 0.553748  | -1.351598 | 0.727807  |
| H | -0.961825 | 1.851221  | -3.129450 |
| H | -1.783416 | 3.389621  | -2.495435 |
| H | 2.462874  | 2.488407  | 0.589683  |
| H | 0.027897  | 0.901135  | 1.518432  |
| H | 1.924702  | 2.410104  | 2.268629  |
| H | 1.269196  | -1.118549 | -2.969006 |
| H | 2.386233  | -2.479236 | -2.819580 |
| H | 2.957613  | -0.858625 | -2.498864 |
| H | 5.641310  | -0.822837 | -0.361733 |
| H | -4.052389 | 0.241447  | 0.055267  |
| H | -4.581906 | -1.176820 | -0.857646 |

|   |           |           |          |
|---|-----------|-----------|----------|
| H | -2.944582 | -1.205827 | 1.717141 |
| H | -5.013195 | -2.075995 | 2.782603 |
| H | -5.291027 | -0.477557 | 2.086102 |
| H | -5.880011 | -1.920686 | 1.253822 |
| H | -3.335648 | -3.661758 | 1.720665 |
| H | -2.430674 | -3.184006 | 0.286113 |
| H | -4.153552 | -3.544085 | 0.159718 |

mPW1PW91 energy = -1155.17488573 a.u.

(2R,6R,7S,8R)-1, Conf. F

|   |           |           |           |
|---|-----------|-----------|-----------|
| C | -4.326273 | -0.615996 | -0.404236 |
| C | -3.504707 | 0.616715  | -0.166193 |
| C | -2.804985 | 1.318618  | -1.057250 |
| C | -2.859646 | 1.095403  | -2.536481 |
| C | -2.202842 | -1.792625 | 0.351328  |
| C | -3.432303 | -1.881823 | -0.509748 |
| C | -0.392072 | 1.676074  | -0.462914 |
| C | -0.164983 | 0.800709  | 0.792931  |
| C | 0.070409  | -0.694996 | 0.518471  |
| C | -1.099654 | -1.279688 | -0.197088 |
| O | 0.586449  | 2.741423  | -0.399424 |
| C | 1.379040  | 2.656120  | 0.678762  |
| C | 0.982162  | 1.478024  | 1.482364  |
| O | 2.254001  | 3.454104  | 0.891124  |
| C | 1.601001  | 1.157218  | 2.609328  |
| C | -1.778356 | 2.315886  | -0.583796 |
| C | -2.369563 | -2.102765 | 1.804244  |
| O | -5.241297 | -0.829869 | 0.668056  |
| O | 1.251170  | -0.798969 | -0.300842 |
| C | 2.058542  | -1.852841 | -0.099589 |
| O | 1.858167  | -2.691068 | 0.744512  |
| C | 3.215770  | -1.845431 | -1.055924 |
| C | 4.188405  | -0.674298 | -0.851735 |
| C | 4.825910  | -0.709029 | 0.531190  |
| C | 5.248355  | -0.693080 | -1.945393 |
| H | -4.887821 | -0.539436 | -1.341314 |
| H | -3.373540 | 0.855416  | 0.887292  |
| H | -3.057049 | 2.039067  | -3.054360 |
| H | -3.627612 | 0.380580  | -2.829537 |
| H | -3.133303 | -1.982019 | -1.554643 |
| H | -4.056189 | -2.742590 | -0.255830 |
| H | -1.899963 | 0.731504  | -2.918519 |
| H | -1.056238 | 0.846110  | 1.423078  |
| H | 0.266641  | -1.193437 | 1.465911  |
| H | -1.104795 | -1.085369 | -1.266396 |
| H | 1.315175  | 0.296706  | 3.202954  |
| H | 2.425903  | 1.764170  | 2.964258  |
| H | -2.057560 | 2.737345  | 0.385023  |
| H | -0.157075 | 1.121544  | -1.371793 |
| H | -1.695597 | 3.142133  | -1.294962 |
| H | -3.057905 | -1.395422 | 2.277428  |
| H | -1.429394 | -2.091836 | 2.354979  |
| H | -2.820978 | -3.091343 | 1.926578  |
| H | -5.793685 | -0.045414 | 0.748900  |
| H | 3.739926  | -2.794973 | -0.938796 |
| H | 2.807536  | -1.802906 | -2.069452 |



|   |          |           |           |
|---|----------|-----------|-----------|
| H | 3.618072 | 0.254872  | -0.944682 |
| H | 5.504036 | 0.136878  | 0.664743  |
| H | 4.078895 | -0.658464 | 1.327011  |
| H | 5.403350 | -1.627270 | 0.673833  |
| H | 5.942336 | 0.142585  | -1.829594 |
| H | 4.800256 | -0.619580 | -2.939361 |
| H | 5.833408 | -1.616982 | -1.909792 |

mPW1PW91 energy = -1155.17483341 a.u.

(2R,6R,7S,8R)-1, Conf. G

|   |           |           |           |
|---|-----------|-----------|-----------|
| C | 3.894041  | -1.369571 | 0.370976  |
| C | 3.377942  | 0.024249  | 0.550396  |
| C | 2.638478  | 0.496937  | 1.551929  |
| C | 2.340475  | -0.259618 | 2.809533  |
| C | 1.733722  | -1.689003 | -0.935454 |
| C | 2.754496  | -2.348661 | -0.053128 |
| C | 0.495013  | 1.627130  | 0.908080  |
| C | 0.338409  | 1.302413  | -0.597514 |
| C | -0.224709 | -0.094613 | -0.913215 |
| C | 0.662199  | -1.151326 | -0.348656 |
| O | -0.225067 | 2.862648  | 1.135277  |
| C | -0.814570 | 3.332491  | 0.026640  |
| C | -0.517078 | 2.425550  | -1.104820 |
| O | -1.467545 | 4.343021  | 0.031619  |
| C | -0.979824 | 2.650924  | -2.326059 |
| C | 1.931309  | 1.819017  | 1.400900  |
| C | 2.097902  | -1.504482 | -2.374235 |
| O | 4.920431  | -1.292558 | -0.612668 |
| O | -1.532484 | -0.175571 | -0.313929 |
| C | -2.507432 | -0.776879 | -1.013938 |
| O | -2.349974 | -1.230042 | -2.120802 |
| C | -3.797362 | -0.797517 | -0.245735 |
| C | -3.737710 | -1.621783 | 1.048210  |
| C | -5.064100 | -1.512931 | 1.789563  |
| C | -3.382461 | -3.077565 | 0.771670  |
| H | 4.319146  | -1.755201 | 1.303971  |
| H | 3.532646  | 0.658188  | -0.319418 |
| H | 2.613181  | 0.339351  | 3.684071  |
| H | 2.875059  | -1.206768 | 2.870339  |
| H | 2.271035  | -2.701157 | 0.860611  |
| H | 3.218915  | -3.216248 | -0.533416 |
| H | 1.270202  | -0.472037 | 2.905326  |
| H | 1.321253  | 1.337349  | -1.073647 |
| H | -0.338493 | -0.185457 | -1.991751 |
| H | 0.507705  | -1.342947 | 0.709748  |
| H | -0.765270 | 1.989858  | -3.157429 |
| H | -1.597222 | 3.520804  | -2.518566 |
| H | 2.460909  | 2.469686  | 0.700889  |
| H | -0.010876 | 0.880964  | 1.521061  |
| H | 1.879986  | 2.337074  | 2.362470  |
| H | 2.967422  | -0.847195 | -2.474282 |
| H | 1.284118  | -1.093663 | -2.971192 |
| H | 2.388473  | -2.462414 | -2.815041 |
| H | 5.289754  | -2.173330 | -0.729003 |
| H | -4.056197 | 0.236978  | -0.003733 |
| H | -4.565117 | -1.193629 | -0.911672 |

|   |           |           |          |
|---|-----------|-----------|----------|
| H | -2.956700 | -1.189406 | 1.681163 |
| H | -5.030826 | -2.066796 | 2.730848 |
| H | -5.309916 | -0.473880 | 2.022041 |
| H | -5.882653 | -1.925250 | 1.192299 |
| H | -3.334670 | -3.647564 | 1.702478 |
| H | -2.414241 | -3.177301 | 0.274989 |
| H | -4.132942 | -3.548561 | 0.130014 |

mPW1PW91 energy = -1155.17459403 a.u.

(2R,6R,7S,8R)-1, Conf. H

|   |           |           |           |
|---|-----------|-----------|-----------|
| C | 4.339014  | -0.596883 | 0.371086  |
| C | 3.523685  | 0.642874  | 0.173552  |
| C | 2.795838  | 1.289339  | 1.082422  |
| C | 2.819471  | 0.987124  | 2.548790  |
| C | 2.201016  | -1.777077 | -0.351754 |
| C | 3.431522  | -1.859147 | 0.506045  |
| C | 0.387191  | 1.685140  | 0.494324  |
| C | 0.166728  | 0.824354  | -0.772512 |
| C | -0.069447 | -0.674438 | -0.517084 |
| C | 1.098121  | -1.264232 | 0.197701  |
| O | -0.578944 | 2.761765  | 0.428350  |
| C | -1.366680 | 2.687949  | -0.654058 |
| C | -0.975392 | 1.510473  | -1.461517 |
| O | -2.234423 | 3.493728  | -0.866923 |
| C | -1.593469 | 1.198045  | -2.591226 |
| C | 1.778353  | 2.308582  | 0.638584  |
| C | 2.363944  | -2.087781 | -1.805263 |
| O | 5.211261  | -0.687676 | -0.750098 |
| O | -1.255209 | -0.788901 | 0.294061  |
| C | -2.046681 | -1.853995 | 0.090859  |
| O | -1.828226 | -2.692628 | -0.748542 |
| C | -3.212019 | -1.860139 | 1.037433  |
| C | -4.196658 | -0.700274 | 0.827529  |
| C | -4.809970 | -0.729031 | -0.566389 |
| C | -5.276868 | -0.747231 | 1.900593  |
| H | 4.936718  | -0.531010 | 1.287044  |
| H | 3.431465  | 0.941466  | -0.867771 |
| H | 3.590600  | 0.266938  | 2.820164  |
| H | 1.857281  | 0.591625  | 2.890966  |
| H | 3.137930  | -1.935820 | 1.555180  |
| H | 4.041364  | -2.737698 | 0.271103  |
| H | 2.995741  | 1.903429  | 3.120554  |
| H | 1.062324  | 0.877100  | -1.396059 |
| H | -0.259418 | -1.161897 | -1.471505 |
| H | 1.103673  | -1.070850 | 1.266940  |
| H | -1.311426 | 0.338240  | -3.187713 |
| H | -2.413587 | 1.811570  | -2.945915 |
| H | 2.064109  | 2.755705  | -0.316693 |
| H | 0.134056  | 1.125015  | 1.394986  |
| H | 1.700139  | 3.114593  | 1.373407  |
| H | 1.419119  | -2.095616 | -2.347903 |
| H | 2.830335  | -3.069410 | -1.929105 |
| H | 3.034412  | -1.368549 | -2.286030 |
| H | 5.761833  | -1.468757 | -0.638110 |
| H | -3.724390 | -2.815285 | 0.913910  |
| H | -2.813310 | -1.815214 | 2.054717  |

|   |           |           |           |
|---|-----------|-----------|-----------|
| H | -3.641560 | 0.235737  | 0.940829  |
| H | -5.497891 | 0.108618  | -0.701935 |
| H | -4.051554 | -0.659369 | -1.349837 |
| H | -5.372244 | -1.653535 | -0.727962 |
| H | -5.979928 | 0.080422  | 1.782200  |
| H | -4.849564 | -0.681198 | 2.904184  |
| H | -5.848095 | -1.678481 | 1.840885  |

mPW1PW91 energy = -1155.17451750 a.u.

(2R,6R,7S,8R)-1, Conf. I

|   |           |           |           |
|---|-----------|-----------|-----------|
| C | -4.283300 | -1.187964 | -0.272632 |
| C | -3.681796 | 0.183000  | -0.169444 |
| C | -3.076467 | 0.878764  | -1.130801 |
| C | -3.066649 | 0.476753  | -2.573197 |
| C | -1.960333 | -1.909592 | 0.512344  |
| C | -3.173544 | -2.290183 | -0.288040 |
| C | -0.758263 | 1.725200  | -0.640205 |
| C | -0.354740 | 0.998094  | 0.665884  |
| C | 0.105943  | -0.460735 | 0.503037  |
| C | -0.964920 | -1.286986 | -0.122013 |
| O | -0.005768 | 2.962949  | -0.664757 |
| C | 0.835274  | 3.080639  | 0.373052  |
| C | 0.696690  | 1.895509  | 1.248673  |
| O | 1.558286  | 4.033348  | 0.502587  |
| C | 1.435472  | 1.738036  | 2.337582  |
| C | -2.240755 | 2.081934  | -0.777831 |
| C | -2.036386 | -2.070069 | 1.999489  |
| O | -5.245759 | -1.409555 | 0.750808  |
| O | 1.273419  | -0.454980 | -0.341150 |
| C | 2.309072  | -1.233106 | 0.014264  |
| O | 2.326617  | -1.903267 | 1.016147  |
| C | 3.399374  | -1.186151 | -1.018309 |
| C | 4.797418  | -1.452826 | -0.467268 |
| C | 5.779508  | -1.662075 | -1.613223 |
| C | 5.257270  | -0.323897 | 0.447162  |
| H | -4.851204 | -1.296163 | -1.197755 |
| H | -3.622398 | 0.568626  | 0.847631  |
| H | -2.056112 | 0.225817  | -2.912207 |
| H | -3.404060 | 1.308226  | -3.199468 |
| H | -2.880750 | -2.439392 | -1.329459 |
| H | -3.632820 | -3.216918 | 0.065106  |
| H | -3.707545 | -0.380117 | -2.777165 |
| H | -1.220762 | 0.961460  | 1.331439  |
| H | 0.393946  | -0.838874 | 1.482279  |
| H | -1.013849 | -1.212740 | -1.204803 |
| H | 1.342952  | 0.869432  | 2.978841  |
| H | 2.163721  | 2.493011  | 2.610383  |
| H | -2.580448 | 2.532622  | 0.157872  |
| H | -0.423927 | 1.166569  | -1.514612 |
| H | -2.319963 | 2.841627  | -1.560313 |
| H | -2.452863 | -3.046766 | 2.257727  |
| H | -2.694629 | -1.319230 | 2.453975  |
| H | -1.063444 | -1.979349 | 2.482990  |
| H | -4.835430 | -1.243880 | 1.605651  |
| H | 3.134654  | -1.951479 | -1.757455 |
| H | 3.355929  | -0.227137 | -1.539265 |

|   |          |           |           |
|---|----------|-----------|-----------|
| H | 4.750052 | -2.374371 | 0.120620  |
| H | 6.782547 | -1.869790 | -1.233395 |
| H | 5.483311 | -2.500510 | -2.248871 |
| H | 5.844229 | -0.770938 | -2.244869 |
| H | 6.245271 | -0.536865 | 0.861922  |
| H | 4.572120 | -0.177273 | 1.284847  |
| H | 5.323922 | 0.620354  | -0.101874 |

mPW1PW91 energy = -1155.17348124 a.u.

(2R,6R,7S,8R)-1, Conf. J

|   |           |           |           |
|---|-----------|-----------|-----------|
| C | -4.072264 | -1.542155 | -0.300758 |
| C | -3.633573 | -0.107134 | -0.267679 |
| C | -3.069502 | 0.592449  | -1.250956 |
| C | -2.950538 | 0.106111  | -2.662151 |
| C | -1.723391 | -1.950364 | 0.609844  |
| C | -2.845665 | -2.507447 | -0.219058 |
| C | -0.883596 | 1.709158  | -0.725302 |
| C | -0.476482 | 1.122868  | 0.648463  |
| C | 0.164582  | -0.277134 | 0.607001  |
| C | -0.767368 | -1.259620 | -0.014896 |
| O | -0.253589 | 3.009947  | -0.815623 |
| C | 0.495956  | 3.300646  | 0.256857  |
| C | 0.421227  | 2.180069  | 1.221336  |
| O | 1.103629  | 4.334880  | 0.348708  |
| C | 1.077692  | 2.202172  | 2.372356  |
| C | -2.386160 | 1.900610  | -0.949382 |
| C | -1.862607 | -2.029306 | 2.099113  |
| O | -5.034721 | -1.811750 | 0.711317  |
| O | 1.366752  | -0.185324 | -0.181732 |
| C | 2.506748  | -0.668401 | 0.340061  |
| O | 2.573607  | -1.205068 | 1.417126  |
| C | 3.668510  | -0.403588 | -0.575309 |
| C | 4.861815  | -1.329399 | -0.361723 |
| C | 4.540547  | -2.757021 | -0.787210 |
| C | 6.079396  | -0.796423 | -1.106396 |
| H | -4.595265 | -1.769398 | -1.230968 |
| H | -3.666019 | 0.346904  | 0.721674  |
| H | -1.903029 | -0.009292 | -2.959400 |
| H | -3.385471 | 0.837281  | -3.350666 |
| H | -2.490185 | -2.667076 | -1.239184 |
| H | -3.211441 | -3.465022 | 0.160506  |
| H | -3.449578 | -0.848400 | -2.824253 |
| H | -1.370521 | 1.019956  | 1.268010  |
| H | 0.440863  | -0.558551 | 1.621795  |
| H | -0.763754 | -1.255275 | -1.101309 |
| H | 1.029384  | 1.385880  | 3.083413  |
| H | 1.692090  | 3.058156  | 2.626991  |
| H | -2.816807 | 2.372717  | -0.062957 |
| H | -0.456089 | 1.125075  | -1.540544 |
| H | -2.504696 | 2.594531  | -1.786109 |
| H | -2.612304 | -1.321747 | 2.474360  |
| H | -0.929733 | -1.814546 | 2.620585  |
| H | -2.195018 | -3.025714 | 2.400237  |
| H | -4.664736 | -1.566204 | 1.565207  |
| H | 3.318330  | -0.438206 | -1.609991 |
| H | 3.957536  | 0.637288  | -0.387754 |

|   |          |           |           |
|---|----------|-----------|-----------|
| H | 5.086526 | -1.333456 | 0.709020  |
| H | 5.385450 | -3.421758 | -0.592443 |
| H | 3.677608 | -3.153998 | -0.248457 |
| H | 4.321557 | -2.804618 | -1.858434 |
| H | 6.948558 | -1.437533 | -0.942184 |
| H | 6.341645 | 0.211840  | -0.776065 |
| H | 5.897722 | -0.756848 | -2.184711 |

mPW1PW91energy = -1155.17347120 a.u.

(2R,6R,7S,8R)-1, Conf. K

|   |           |           |           |
|---|-----------|-----------|-----------|
| C | 3.934734  | -1.364452 | 0.355619  |
| C | 3.411821  | 0.034236  | 0.505751  |
| C | 2.687806  | 0.532924  | 1.506468  |
| C | 2.431833  | -0.182275 | 2.796624  |
| C | 1.746270  | -1.707390 | -0.914936 |
| C | 2.792365  | -2.351522 | -0.050860 |
| C | 0.518777  | 1.640561  | 0.884321  |
| C | 0.316454  | 1.278057  | -0.607448 |
| C | -0.225522 | -0.135840 | -0.881795 |
| C | 0.684438  | -1.168539 | -0.311876 |
| O | -0.187282 | 2.886566  | 1.098758  |
| C | -0.821253 | 3.321282  | 0.000375  |
| C | -0.582328 | 2.370315  | -1.108219 |
| O | -1.466926 | 4.336362  | -0.003142 |
| C | -1.138292 | 2.529690  | -2.300651 |
| C | 1.968500  | 1.845406  | 1.332848  |
| C | 2.064999  | -1.531540 | -2.367700 |
| O | 5.031391  | -1.411601 | -0.549201 |
| O | -1.523936 | -0.229714 | -0.265475 |
| C | -2.525061 | -0.762821 | -0.984283 |
| O | -2.394621 | -1.162314 | -2.115076 |
| C | -3.809042 | -0.779458 | -0.206216 |
| C | -3.755558 | -1.614671 | 1.080035  |
| C | -5.079831 | -1.498122 | 1.824018  |
| C | -3.416482 | -3.071449 | 0.788876  |
| H | 4.349996  | -1.731062 | 1.295293  |
| H | 3.532991  | 0.651174  | -0.383791 |
| H | 1.363486  | -0.369241 | 2.946914  |
| H | 2.754825  | 0.437090  | 3.639347  |
| H | 2.324915  | -2.702807 | 0.871531  |
| H | 3.264136  | -3.210829 | -0.534300 |
| H | 2.950941  | -1.137357 | 2.863309  |
| H | 1.281576  | 1.328372  | -1.117475 |
| H | -0.349652 | -0.251246 | -1.957027 |
| H | 0.553534  | -1.346462 | 0.751859  |
| H | -0.978976 | 1.830255  | -3.112791 |
| H | -1.779897 | 3.383076  | -2.487405 |
| H | 2.477219  | 2.477330  | 0.600816  |
| H | 0.027362  | 0.911763  | 1.529876  |
| H | 1.940494  | 2.391739  | 2.279614  |
| H | 2.487047  | -2.450606 | -2.781243 |
| H | 2.813429  | -0.745425 | -2.524605 |
| H | 1.190295  | -1.265959 | -2.961641 |
| H | 4.773290  | -0.991341 | -1.375850 |
| H | -4.054106 | 0.256633  | 0.044535  |
| H | -4.584953 | -1.158415 | -0.872650 |

|   |           |           |          |
|---|-----------|-----------|----------|
| H | -2.968906 | -1.196643 | 1.715414 |
| H | -5.051098 | -2.058501 | 2.761538 |
| H | -5.315451 | -0.458277 | 2.063628 |
| H | -5.903122 | -1.898201 | 1.224927 |
| H | -3.372081 | -3.651082 | 1.713843 |
| H | -2.450408 | -3.176408 | 0.288884 |
| H | -4.173668 | -3.528321 | 0.144840 |

mPW1PW91 energy = -1155.17301201 a.u.

(2R,6R,7S,8R)-1, Conf. L

|   |           |           |           |
|---|-----------|-----------|-----------|
| C | 4.343034  | -0.614901 | 0.383650  |
| C | 3.527630  | 0.625729  | 0.166068  |
| C | 2.807223  | 1.294269  | 1.065537  |
| C | 2.842400  | 1.021088  | 2.537153  |
| C | 2.193127  | -1.791386 | -0.351460 |
| C | 3.430210  | -1.878679 | 0.497761  |
| C | 0.395998  | 1.686688  | 0.482305  |
| C | 0.165180  | 0.818324  | -0.777565 |
| C | -0.071370 | -0.678933 | -0.513055 |
| C | 1.097970  | -1.265236 | 0.200914  |
| O | -0.568299 | 2.764559  | 0.416137  |
| C | -1.363103 | 2.686172  | -0.660813 |
| C | -0.979972 | 1.502666  | -1.463498 |
| O | -2.229920 | 3.492761  | -0.873462 |
| C | -1.606832 | 1.184468  | -2.586673 |
| C | 1.789464  | 2.308669  | 0.611141  |
| C | 2.327014  | -2.119659 | -1.806332 |
| O | 5.340297  | -0.760494 | -0.619867 |
| O | -1.254976 | -0.789239 | 0.300626  |
| C | -2.053325 | -1.849478 | 0.095561  |
| O | -1.841589 | -2.685758 | -0.747782 |
| C | -3.215731 | -1.852391 | 1.045389  |
| C | -4.196845 | -0.688808 | 0.838976  |
| C | -4.818798 | -0.718033 | -0.551109 |
| C | -5.270115 | -0.728489 | 1.919206  |
| H | 4.909824  | -0.550464 | 1.313739  |
| H | 3.419654  | 0.911017  | -0.879642 |
| H | 3.621345  | 0.313083  | 2.817698  |
| H | 1.885439  | 0.624314  | 2.892246  |
| H | 3.135850  | -1.967837 | 1.545648  |
| H | 4.046631  | -2.746397 | 0.249412  |
| H | 3.014120  | 1.949884  | 3.089573  |
| H | 1.056720  | 0.867182  | -1.407229 |
| H | -0.262214 | -1.171124 | -1.465198 |
| H | 1.112053  | -1.062644 | 1.268280  |
| H | -1.332013 | 0.319800  | -3.179486 |
| H | -2.427958 | 1.797902  | -2.939186 |
| H | 2.071402  | 2.742599  | -0.351411 |
| H | 0.148956  | 1.132828  | 1.388523  |
| H | 1.716980  | 3.124751  | 1.335146  |
| H | 1.362642  | -2.248844 | -2.297779 |
| H | 2.898032  | -3.042309 | -1.935610 |
| H | 2.868591  | -1.338114 | -2.352878 |
| H | 4.919616  | -0.723964 | -1.484866 |
| H | -3.731773 | -2.805663 | 0.922804  |
| H | -2.813726 | -1.809379 | 2.061406  |

|   |           |           |           |
|---|-----------|-----------|-----------|
| H | -3.637026 | 0.245074  | 0.946654  |
| H | -5.503593 | 0.122497  | -0.684605 |
| H | -4.064554 | -0.653790 | -1.339054 |
| H | -5.386219 | -1.640308 | -0.707234 |
| H | -5.970712 | 0.101554  | 1.803018  |
| H | -4.835717 | -0.661117 | 2.919640  |
| H | -5.845415 | -1.657634 | 1.866233  |

mPW1PW91 energy = -1155.17291002 a.u.

(2R,6R,7S,8R)-1, Conf. M

|   |           |           |           |
|---|-----------|-----------|-----------|
| C | 3.769324  | -1.704685 | 0.160468  |
| C | 3.415075  | -0.249279 | 0.248303  |
| C | 2.899473  | 0.408110  | 1.286425  |
| C | 2.742271  | -0.167641 | 2.659467  |
| C | 1.453440  | -1.863739 | -0.877706 |
| C | 2.508920  | -2.581145 | -0.082941 |
| C | 0.795784  | 1.694157  | 0.808501  |
| C | 0.390283  | 1.272453  | -0.625125 |
| C | -0.332023 | -0.082898 | -0.734888 |
| C | 0.525784  | -1.180119 | -0.204636 |
| O | 0.236515  | 3.013756  | 1.018192  |
| C | -0.469739 | 3.452694  | -0.033507 |
| C | -0.436282 | 2.430194  | -1.103060 |
| O | -1.016342 | 4.524518  | -0.031321 |
| C | -1.079994 | 2.593464  | -2.250000 |
| C | 2.300349  | 1.776097  | 1.082574  |
| C | 1.643783  | -1.811946 | -2.359782 |
| O | 4.667100  | -1.942598 | -0.921460 |
| O | -1.543108 | 0.013497  | 0.040358  |
| C | -2.683757 | -0.430321 | -0.514666 |
| O | -2.738202 | -0.933144 | -1.610050 |
| C | -3.863618 | -0.212995 | 0.390554  |
| C | -4.373312 | -1.490069 | 1.087020  |
| C | -4.940399 | -2.509885 | 0.108187  |
| C | -3.315569 | -2.115992 | 1.987833  |
| H | 4.231505  | -2.055406 | 1.088882  |
| H | 3.464025  | 0.268613  | -0.707484 |
| H | 3.151404  | -1.172990 | 2.750627  |
| H | 1.688775  | -0.206647 | 2.955558  |
| H | 2.104752  | -2.850077 | 0.894522  |
| H | 2.843078  | -3.500384 | -0.570655 |
| H | 3.241578  | 0.470580  | 3.395355  |
| H | 1.290985  | 1.178764  | -1.236248 |
| H | -0.606759 | -0.243516 | -1.775725 |
| H | 0.494117  | -1.287448 | 0.875927  |
| H | -1.067338 | 1.843241  | -3.031918 |
| H | -1.646359 | 3.500371  | -2.427655 |
| H | 2.782338  | 2.295860  | 0.251000  |
| H | 0.315850  | 1.054783  | 1.550186  |
| H | 2.434798  | 2.386979  | 1.979420  |
| H | 1.741263  | -2.824824 | -2.761117 |
| H | 2.574365  | -1.295040 | -2.614154 |
| H | 0.822581  | -1.320554 | -2.880797 |
| H | 5.452837  | -1.404376 | -0.780170 |
| H | -3.599873 | 0.531006  | 1.142450  |
| H | -4.662448 | 0.196294  | -0.231494 |

|   |           |           |           |
|---|-----------|-----------|-----------|
| H | -5.195343 | -1.149684 | 1.725694  |
| H | -5.378995 | -3.351186 | 0.650500  |
| H | -5.720934 | -2.072161 | -0.518532 |
| H | -4.167518 | -2.905365 | -0.553894 |
| H | -3.740691 | -2.947727 | 2.554422  |
| H | -2.916450 | -1.393959 | 2.704327  |
| H | -2.478001 | -2.512112 | 1.407094  |

mPW1PW91 energy = -1155.17279154 a.u.

(2R,6R,7S,8S)-1, Conf. A

|   |           |           |           |
|---|-----------|-----------|-----------|
| C | 3.117437  | -2.637029 | -0.345738 |
| C | 3.154463  | -1.242940 | -0.878105 |
| C | 3.552401  | -0.146571 | -0.230123 |
| C | 4.348787  | -0.127710 | 1.039094  |
| C | 0.859951  | -1.949176 | 0.552076  |
| C | 1.640156  | -3.044028 | -0.128169 |
| C | 1.811860  | 1.599181  | 0.109657  |
| C | 0.430267  | 1.370196  | -0.563744 |
| C | -0.370660 | 0.251223  | 0.142058  |
| C | 0.205914  | -1.076625 | -0.215978 |
| O | 1.888247  | 3.011640  | 0.417538  |
| C | 0.762398  | 3.670926  | 0.115316  |
| C | -0.193257 | 2.737452  | -0.522410 |
| O | 0.631491  | 4.845171  | 0.342720  |
| C | -1.347013 | 3.179363  | -1.005437 |
| C | 3.069282  | 1.206113  | -0.686409 |
| C | 1.007367  | -1.855332 | 2.036059  |
| O | 3.657538  | -3.601450 | -1.246866 |
| O | -1.723242 | 0.323916  | -0.360903 |
| C | -2.702478 | -0.086167 | 0.459312  |
| O | -2.506772 | -0.491196 | 1.577960  |
| C | -4.058417 | 0.067954  | -0.171936 |
| C | -5.014115 | -1.082568 | 0.144751  |
| C | -6.429471 | -0.725908 | -0.290452 |
| C | -4.550196 | -2.379763 | -0.506775 |
| H | 3.645096  | -2.698669 | 0.609592  |
| H | 2.612158  | -1.109477 | -1.811910 |
| H | 5.267374  | 0.446116  | 0.878300  |
| H | 4.633888  | -1.118802 | 1.387689  |
| H | 1.617365  | -3.975971 | 0.442339  |
| H | 1.218712  | -3.245000 | -1.115598 |
| H | 3.814288  | 0.378733  | 1.848422  |
| H | 0.573026  | 1.068297  | -1.604014 |
| H | -0.395551 | 0.429780  | 1.215544  |
| H | 0.173053  | -1.273192 | -1.285471 |
| H | -2.046146 | 2.535732  | -1.520197 |
| H | -1.602105 | 4.226949  | -0.890161 |
| H | 2.854499  | 1.214739  | -1.756538 |
| H | 1.831259  | 1.097286  | 1.078316  |
| H | 3.826774  | 1.969037  | -0.490774 |
| H | 2.059288  | -1.752177 | 2.319275  |
| H | 0.654084  | -2.781094 | 2.500502  |
| H | 0.449851  | -1.029611 | 2.474442  |
| H | 4.581412  | -3.377100 | -1.397342 |
| H | -4.464108 | 1.006276  | 0.222758  |

|   |           |           |           |
|---|-----------|-----------|-----------|
| H | -3.946686 | 0.196863  | -1.250179 |
| H | -5.009732 | -1.222262 | 1.229732  |
| H | -7.123999 | -1.536785 | -0.058854 |
| H | -6.788746 | 0.174887  | 0.213313  |
| H | -6.478226 | -0.547300 | -1.368900 |
| H | -3.543498 | -2.658442 | -0.186224 |
| H | -4.542319 | -2.289453 | -1.597451 |
| H | -5.217171 | -3.205549 | -0.248483 |

mPW1PW91 energy = -1155.17247321 a.u.

(2R,6R,7S,8S)-1, Conf. B

|   |           |           |           |
|---|-----------|-----------|-----------|
| C | 3.742898  | -2.103268 | -0.285609 |
| C | 3.513473  | -0.717489 | -0.790077 |
| C | 3.609123  | 0.416994  | -0.094330 |
| C | 4.281141  | 0.566066  | 1.237072  |
| C | 1.330534  | -1.958237 | 0.450288  |
| C | 2.378665  | -2.829172 | -0.192474 |
| C | 1.511380  | 1.732862  | 0.145163  |
| C | 0.258367  | 1.232787  | -0.626642 |
| C | -0.317467 | -0.059601 | -0.003283 |
| C | 0.560370  | -1.215199 | -0.345972 |
| O | 1.258702  | 3.117513  | 0.483353  |
| C | 0.032369  | 3.522683  | 0.128452  |
| C | -0.653494 | 2.427303  | -0.592691 |
| O | -0.369330 | 4.629293  | 0.376667  |
| C | -1.845133 | 2.623383  | -1.141558 |
| C | 2.874073  | 1.645420  | -0.565278 |
| C | 1.342622  | -1.897354 | 1.943410  |
| O | 4.545258  | -2.896675 | -1.157612 |
| O | -1.616755 | -0.271911 | -0.598765 |
| C | -2.530685 | -0.914997 | 0.145506  |
| O | -2.344172 | -1.243712 | 1.289986  |
| C | -3.775814 | -1.201296 | -0.645965 |
| C | -5.038087 | -1.332276 | 0.201129  |
| C | -5.421366 | -0.001825 | 0.838132  |
| C | -6.180989 | -1.883847 | -0.641836 |
| H | 4.199224  | -2.081621 | 0.707256  |
| H | 3.030770  | -0.675213 | -1.764440 |
| H | 5.066523  | 1.325424  | 1.162159  |
| H | 4.741613  | -0.351869 | 1.597828  |
| H | 2.521888  | -3.765479 | 0.352764  |
| H | 2.082539  | -3.078320 | -1.214030 |
| H | 3.588745  | 0.924665  | 2.004613  |
| H | 0.526526  | 1.010221  | -1.662179 |
| H | -0.451892 | 0.071591  | 1.068565  |
| H | 0.648765  | -1.370113 | -1.418987 |
| H | -2.349736 | 1.862604  | -1.720043 |
| H | -2.334775 | 3.582988  | -1.017831 |
| H | 2.733862  | 1.637784  | -1.647726 |
| H | 1.573723  | 1.214982  | 1.103841  |
| H | 3.431498  | 2.549184  | -0.306762 |
| H | 0.577064  | -1.241556 | 2.354353  |
| H | 2.317427  | -1.566686 | 2.314979  |
| H | 1.181132  | -2.898456 | 2.354731  |
| H | 5.404623  | -2.470167 | -1.235514 |
| H | -3.894977 | -0.438182 | -1.418774 |

|   |           |           |           |
|---|-----------|-----------|-----------|
| H | -3.576380 | -2.141976 | -1.173230 |
| H | -4.823000 | -2.046222 | 1.001555  |
| H | -6.300928 | -0.115600 | 1.475938  |
| H | -4.615168 | 0.398117  | 1.456691  |
| H | -5.661673 | 0.743421  | 0.073462  |
| H | -7.086330 | -2.000899 | -0.041653 |
| H | -5.932367 | -2.860207 | -1.065321 |
| H | -6.420178 | -1.212096 | -1.471891 |

mPW1PW91 energy = -1155.17240079 a.u.

(2R,6R,7S,8S)-1, Conf. C

|   |           |           |           |
|---|-----------|-----------|-----------|
| C | 3.625207  | -2.216531 | -0.367897 |
| C | 3.447803  | -0.797996 | -0.799455 |
| C | 3.611425  | 0.295841  | -0.052662 |
| C | 4.304438  | 0.346959  | 1.275129  |
| C | 1.225992  | -2.006946 | 0.384590  |
| C | 2.236476  | -2.897143 | -0.290311 |
| C | 1.564911  | 1.677397  | 0.224424  |
| C | 0.330798  | 1.231495  | -0.606117 |
| C | -0.337399 | -0.031743 | -0.001525 |
| C | 0.463465  | -1.228641 | -0.385119 |
| O | 1.324790  | 3.052237  | 0.608571  |
| C | 0.142738  | 3.513515  | 0.178140  |
| C | -0.521702 | 2.466505  | -0.630286 |
| O | -0.238454 | 4.625618  | 0.432958  |
| C | -1.639666 | 2.724033  | -1.296153 |
| C | 2.941254  | 1.584732  | -0.455682 |
| C | 1.271535  | -1.967132 | 1.878107  |
| O | 4.386361  | -2.994458 | -1.289733 |
| O | -1.655024 | -0.172819 | -0.572353 |
| C | -2.704817 | -0.205153 | 0.264953  |
| O | -2.610268 | -0.117396 | 1.463714  |
| C | -4.001583 | -0.329652 | -0.485343 |
| C | -5.058712 | -1.153555 | 0.248177  |
| C | -6.405845 | -1.017748 | -0.449109 |
| C | -4.642619 | -2.615136 | 0.360144  |
| H | 4.095502  | -2.262180 | 0.617683  |
| H | 2.958687  | -0.684442 | -1.764923 |
| H | 5.124052  | 1.071222  | 1.225220  |
| H | 4.723312  | -0.608270 | 1.586388  |
| H | 2.348838  | -3.854481 | 0.224818  |
| H | 1.925996  | -3.103039 | -1.317169 |
| H | 3.637821  | 0.701424  | 2.067086  |
| H | 0.640164  | 0.983608  | -1.623581 |
| H | -0.446536 | 0.086053  | 1.073652  |
| H | 0.523289  | -1.371998 | -1.461709 |
| H | -2.107505 | 1.995650  | -1.944469 |
| H | -2.103192 | 3.699889  | -1.203698 |
| H | 2.829916  | 1.658978  | -1.539058 |
| H | 1.592031  | 1.123971  | 1.164451  |
| H | 3.529203  | 2.442397  | -0.120098 |
| H | 0.529851  | -1.300199 | 2.315161  |
| H | 2.260570  | -1.662407 | 2.233259  |
| H | 1.097727  | -2.970505 | 2.278905  |
| H | 5.264025  | -2.603690 | -1.349631 |
| H | -4.363777 | 0.695339  | -0.624982 |

|   |           |           |           |
|---|-----------|-----------|-----------|
| H | -3.806765 | -0.734737 | -1.480543 |
| H | -5.149614 | -0.743488 | 1.258241  |
| H | -7.175707 | -1.586945 | 0.077096  |
| H | -6.731699 | 0.024624  | -0.490680 |
| H | -6.360243 | -1.394539 | -1.475400 |
| H | -5.390310 | -3.191173 | 0.910291  |
| H | -3.690700 | -2.726170 | 0.884326  |
| H | -4.536369 | -3.068950 | -0.629922 |

mPW1PW91 energy = -1155.17221838 a.u.

(2R,6R,7S,8S)-1, Conf. D

|   |           |           |           |
|---|-----------|-----------|-----------|
| C | 3.128855  | -2.533739 | -0.387412 |
| C | 3.069368  | -1.156312 | -0.959966 |
| C | 3.457271  | -0.024728 | -0.368646 |
| C | 4.323697  | 0.063692  | 0.851017  |
| C | 0.910585  | -1.922254 | 0.650237  |
| C | 1.689747  | -2.999209 | -0.058980 |
| C | 1.672764  | 1.658216  | 0.036727  |
| C | 0.263370  | 1.335937  | -0.531451 |
| C | -0.434226 | 0.215462  | 0.276625  |
| C | 0.164226  | -1.100265 | -0.089252 |
| O | 1.697085  | 3.083407  | 0.288750  |
| C | 0.523154  | 3.675887  | 0.033517  |
| C | -0.421011 | 2.673040  | -0.508135 |
| O | 0.347554  | 4.850854  | 0.223478  |
| C | -1.619360 | 3.038061  | -0.944194 |
| C | 2.890483  | 1.293202  | -0.830232 |
| C | 1.157346  | -1.782044 | 2.117493  |
| O | 3.652050  | -3.501169 | -1.295128 |
| O | -1.827390 | 0.208953  | -0.102451 |
| C | -2.733588 | -0.012206 | 0.863168  |
| O | -2.448807 | -0.154109 | 2.026755  |
| C | -4.127591 | -0.051797 | 0.306414  |
| C | -4.386895 | -1.239053 | -0.632810 |
| C | -4.172544 | -2.570457 | 0.076075  |
| C | -5.795167 | -1.141814 | -1.205159 |
| H | 3.719711  | -2.542820 | 0.532080  |
| H | 2.466972  | -1.075841 | -1.862562 |
| H | 4.674048  | -0.904184 | 1.204970  |
| H | 3.811586  | 0.564142  | 1.678396  |
| H | 1.749539  | -3.916730 | 0.531750  |
| H | 1.209717  | -3.243002 | -1.009575 |
| H | 5.203421  | 0.675335  | 0.625463  |
| H | 0.353232  | 0.992727  | -1.564748 |
| H | -0.372706 | 0.431090  | 1.341170  |
| H | 0.061783  | -1.329447 | -1.147593 |
| H | -2.310227 | 2.339719  | -1.395315 |
| H | -1.921539 | 4.075828  | -0.858218 |
| H | 2.604334  | 1.260266  | -1.883112 |
| H | 1.782765  | 1.196227  | 1.019060  |
| H | 3.626800  | 2.091339  | -0.707491 |
| H | 0.582438  | -0.979164 | 2.575901  |
| H | 2.218152  | -1.609655 | 2.322842  |
| H | 0.893921  | -2.714540 | 2.626043  |
| H | 4.554633  | -3.244451 | -1.509536 |
| H | -4.812964 | -0.086391 | 1.154331  |

|   |           |           |           |
|---|-----------|-----------|-----------|
| H | -4.301435 | 0.883261  | -0.233099 |
| H | -3.674536 | -1.170891 | -1.460944 |
| H | -4.361050 | -3.404833 | -0.603439 |
| H | -3.151642 | -2.675694 | 0.450989  |
| H | -4.851622 | -2.674201 | 0.927399  |
| H | -5.994560 | -1.968196 | -1.891332 |
| H | -5.941785 | -0.208540 | -1.754553 |
| H | -6.545848 | -1.182550 | -0.410340 |

mPW1PW91 energy = -1155.17187674 a.u.

(2R,6R,7S,8S)-1, Conf. E

|   |           |           |           |
|---|-----------|-----------|-----------|
| C | 3.128145  | -2.638479 | -0.338769 |
| C | 3.162650  | -1.246246 | -0.879589 |
| C | 3.554646  | -0.145511 | -0.236916 |
| C | 4.353362  | -0.120667 | 1.030194  |
| C | 0.860198  | -1.946216 | 0.551622  |
| C | 1.641645  | -3.040860 | -0.127012 |
| C | 1.811767  | 1.599045  | 0.103708  |
| C | 0.427253  | 1.372601  | -0.564687 |
| C | -0.372313 | 0.253799  | 0.142569  |
| C | 0.203133  | -1.074572 | -0.215186 |
| O | 1.891269  | 3.011392  | 0.411568  |
| C | 0.765119  | 3.672318  | 0.114692  |
| C | -0.194716 | 2.740441  | -0.519261 |
| O | 0.636542  | 4.846604  | 0.343045  |
| C | -1.350523 | 3.183903  | -0.995868 |
| C | 3.065785  | 1.203916  | -0.696786 |
| C | 1.014054  | -1.850201 | 2.034786  |
| O | 3.784955  | -3.600286 | -1.156013 |
| O | -1.725528 | 0.326274  | -0.358920 |
| C | -2.703627 | -0.086131 | 0.461747  |
| O | -2.506120 | -0.493669 | 1.579086  |
| C | -4.060462 | 0.068276  | -0.167477 |
| C | -5.013777 | -1.085199 | 0.145728  |
| C | -6.430027 | -0.729902 | -0.287608 |
| C | -4.547603 | -2.379295 | -0.510350 |
| H | 3.648542  | -2.690549 | 0.616360  |
| H | 2.613448  | -1.111263 | -1.810640 |
| H | 5.273981  | 0.447684  | 0.862101  |
| H | 4.637651  | -1.110385 | 1.382918  |
| H | 1.616043  | -3.974601 | 0.440290  |
| H | 1.214149  | -3.238040 | -1.114692 |
| H | 3.823152  | 0.393796  | 1.837325  |
| H | 0.565742  | 1.072077  | -1.605987 |
| H | -0.395757 | 0.432674  | 1.216041  |
| H | 0.166438  | -1.272096 | -1.284553 |
| H | -2.053103 | 2.541474  | -1.507419 |
| H | -1.604093 | 4.231588  | -0.878187 |
| H | 2.845858  | 1.207596  | -1.765958 |
| H | 1.833479  | 1.096982  | 1.072201  |
| H | 3.823117  | 1.968894  | -0.508902 |
| H | 0.657433  | -2.772933 | 2.502661  |
| H | 0.463288  | -1.020219 | 2.473500  |
| H | 2.067630  | -1.752527 | 2.313478  |
| H | 3.379030  | -3.584456 | -2.029531 |
| H | -4.467427 | 1.004248  | 0.231399  |

|   |           |           |           |
|---|-----------|-----------|-----------|
| H | -3.950215 | 0.201705  | -1.245341 |
| H | -5.008606 | -1.228570 | 1.230205  |
| H | -7.122954 | -1.542682 | -0.057921 |
| H | -6.790624 | 0.168743  | 0.219006  |
| H | -6.479811 | -0.548212 | -1.365501 |
| H | -5.212803 | -3.207269 | -0.254511 |
| H | -3.540255 | -2.657052 | -0.190961 |
| H | -4.540530 | -2.285243 | -1.600734 |

mPW1PW91 energy = -1155.17134766 a.u.

(2R,6R,7S,8S)-1, Conf. F

|   |           |           |           |
|---|-----------|-----------|-----------|
| C | 3.126808  | -2.637248 | -0.350917 |
| C | 3.162410  | -1.248235 | -0.887437 |
| C | 3.550119  | -0.150919 | -0.236953 |
| C | 4.345990  | -0.128109 | 1.032260  |
| C | 0.861646  | -1.940504 | 0.555956  |
| C | 1.638745  | -3.034674 | -0.127605 |
| C | 1.812402  | 1.600438  | 0.104444  |
| C | 0.427312  | 1.375688  | -0.562781 |
| C | -0.372315 | 0.258186  | 0.145930  |
| C | 0.203296  | -1.070209 | -0.211243 |
| O | 1.895298  | 3.013563  | 0.408727  |
| C | 0.769924  | 3.675833  | 0.112314  |
| C | -0.192739 | 2.744368  | -0.517959 |
| O | 0.643782  | 4.850887  | 0.338557  |
| C | -1.348791 | 3.188737  | -0.993181 |
| C | 3.064591  | 1.200119  | -0.695650 |
| C | 1.018753  | -1.841553 | 2.038633  |
| O | 3.735151  | -3.524303 | -1.283656 |
| O | -1.725526 | 0.330092  | -0.355730 |
| C | -2.703263 | -0.086077 | 0.462923  |
| O | -2.506054 | -0.496364 | 1.579470  |
| C | -4.059805 | 0.067996  | -0.167117 |
| C | -5.012667 | -1.086410 | 0.143787  |
| C | -6.428631 | -0.731611 | -0.290985 |
| C | -4.544871 | -2.379475 | -0.513197 |
| H | 3.656933  | -2.693257 | 0.603108  |
| H | 2.623023  | -1.118173 | -1.823106 |
| H | 3.808794  | 0.372715  | 1.843356  |
| H | 5.260452  | 0.451939  | 0.870845  |
| H | 1.609401  | -3.967218 | 0.445107  |
| H | 1.214509  | -3.231830 | -1.114665 |
| H | 4.639858  | -1.117989 | 1.376750  |
| H | 0.564725  | 1.074147  | -1.603883 |
| H | -0.395840 | 0.438356  | 1.219225  |
| H | 0.165586  | -1.269237 | -1.280112 |
| H | -2.053051 | 2.546338  | -1.502441 |
| H | -1.600532 | 4.237044  | -0.877119 |
| H | 2.844914  | 1.204395  | -1.764794 |
| H | 1.833266  | 1.101175  | 1.074428  |
| H | 3.824842  | 1.962225  | -0.507585 |
| H | 2.071955  | -1.731021 | 2.314062  |
| H | 0.672953  | -2.767041 | 2.509332  |
| H | 0.460179  | -1.016850 | 2.477576  |
| H | 3.641300  | -4.423076 | -0.950652 |
| H | -4.467749 | 1.003311  | 0.232336  |

|   |           |           |           |
|---|-----------|-----------|-----------|
| H | -3.948577 | 0.202679  | -1.244722 |
| H | -5.008759 | -1.230924 | 1.228136  |
| H | -7.121380 | -1.545044 | -0.063025 |
| H | -6.790458 | 0.166345  | 0.215990  |
| H | -6.477083 | -0.548932 | -1.368765 |
| H | -5.209664 | -3.208251 | -0.258813 |
| H | -3.537487 | -2.656634 | -0.193412 |
| H | -4.536810 | -2.284246 | -1.603441 |

mPW1PW91 energy = -1155.17134598 a.u.

(2R,6R,7S,8S)-1, Conf. G

|   |           |           |           |
|---|-----------|-----------|-----------|
| C | 3.748913  | -2.108737 | -0.276874 |
| C | 3.520374  | -0.725871 | -0.792914 |
| C | 3.612733  | 0.413220  | -0.105762 |
| C | 4.289093  | 0.570951  | 1.221968  |
| C | 1.326359  | -1.953275 | 0.454711  |
| C | 2.373060  | -2.827523 | -0.185241 |
| C | 1.515944  | 1.732090  | 0.136567  |
| C | 0.255487  | 1.236753  | -0.626372 |
| C | -0.320899 | -0.053908 | -0.000504 |
| C | 0.554089  | -1.212028 | -0.341523 |
| O | 1.271518  | 3.118455  | 0.474083  |
| C | 0.043983  | 3.527907  | 0.128975  |
| C | -0.652224 | 2.434264  | -0.585106 |
| O | -0.351645 | 4.636251  | 0.379055  |
| C | -1.848524 | 2.634024  | -1.122379 |
| C | 2.873992  | 1.637310  | -0.582198 |
| C | 1.344988  | -1.885629 | 1.947525  |
| O | 4.652605  | -2.881936 | -1.057765 |
| O | -1.620643 | -0.264544 | -0.595855 |
| C | -2.532737 | -0.914132 | 0.145251  |
| O | -2.344352 | -1.249767 | 1.287310  |
| C | -3.777849 | -1.197920 | -0.647199 |
| C | -5.040060 | -1.334102 | 0.199180  |
| C | -5.424268 | -0.007397 | 0.843297  |
| C | -6.182439 | -1.881770 | -0.647072 |
| H | 4.199317  | -2.078573 | 0.713770  |
| H | 3.028650  | -0.685784 | -1.764371 |
| H | 5.079492  | 1.323815  | 1.136025  |
| H | 4.747213  | -0.345735 | 1.588530  |
| H | 2.512515  | -3.765129 | 0.358542  |
| H | 2.068892  | -3.075445 | -1.206528 |
| H | 3.601538  | 0.941692  | 1.988140  |
| H | 0.515495  | 1.014162  | -1.664068 |
| H | -0.454633 | 0.079036  | 1.071241  |
| H | 0.637333  | -1.371097 | -1.414510 |
| H | -2.361512 | 1.874581  | -1.695225 |
| H | -2.333649 | 3.595366  | -0.994491 |
| H | 2.726839  | 1.620812  | -1.663701 |
| H | 1.581916  | 1.215502  | 1.095674  |
| H | 3.433630  | 2.542975  | -0.335587 |
| H | 0.581196  | -1.227837 | 2.358445  |
| H | 2.321197  | -1.552864 | 2.313370  |
| H | 1.185437  | -2.884740 | 2.364303  |
| H | 4.319553  | -2.916358 | -1.961027 |
| H | -3.897847 | -0.431403 | -1.416506 |

|   |           |           |           |
|---|-----------|-----------|-----------|
| H | -3.577742 | -2.136154 | -1.178607 |
| H | -4.824706 | -2.052198 | 0.995807  |
| H | -6.304433 | -0.125155 | 1.479517  |
| H | -4.618856 | 0.389210  | 1.465022  |
| H | -5.664022 | 0.742143  | 0.082662  |
| H | -7.087902 | -2.002366 | -0.047822 |
| H | -5.933273 | -2.855795 | -1.075613 |
| H | -6.421590 | -1.205687 | -1.473604 |

mPW1PW91 energy = -1155.17127211 a.u.

(2R,6R,7S,8S)-1, Conf. I

|   |           |           |           |
|---|-----------|-----------|-----------|
| C | 3.749526  | -2.102892 | -0.284889 |
| C | 3.525032  | -0.722586 | -0.796601 |
| C | 3.608020  | 0.410988  | -0.099624 |
| C | 4.275067  | 0.564776  | 1.233505  |
| C | 1.324338  | -1.950000 | 0.446690  |
| C | 2.370518  | -2.819416 | -0.199935 |
| C | 1.513766  | 1.737876  | 0.137868  |
| C | 0.253524  | 1.244119  | -0.626262 |
| C | -0.321141 | -0.048155 | -0.002974 |
| C | 0.555375  | -1.203826 | -0.348051 |
| O | 1.272550  | 3.126187  | 0.470572  |
| C | 0.044188  | 3.535524  | 0.128619  |
| C | -0.654469 | 2.441334  | -0.582232 |
| O | -0.350387 | 4.644388  | 0.378491  |
| C | -1.852410 | 2.640903  | -1.115944 |
| C | 2.873230  | 1.637218  | -0.576683 |
| C | 1.338255  | -1.891615 | 1.939936  |
| O | 4.612569  | -2.806420 | -1.171959 |
| O | -1.621638 | -0.259069 | -0.596916 |
| C | -2.528589 | -0.918708 | 0.141080  |
| O | -2.335280 | -1.263737 | 1.279674  |
| C | -3.775351 | -1.200647 | -0.649424 |
| C | -5.035240 | -1.340777 | 0.199819  |
| C | -5.418712 | -0.016593 | 0.849559  |
| C | -6.179479 | -1.886390 | -0.645205 |
| H | 4.196972  | -2.074624 | 0.711575  |
| H | 3.049577  | -0.683445 | -1.774324 |
| H | 4.740648  | -0.350406 | 1.594453  |
| H | 3.580085  | 0.921422  | 1.999653  |
| H | 2.500679  | -3.761710 | 0.341839  |
| H | 2.075917  | -3.057535 | -1.224595 |
| H | 5.057786  | 1.326755  | 1.158108  |
| H | 0.513837  | 1.024236  | -1.664475 |
| H | -0.453871 | 0.082198  | 1.069258  |
| H | 0.643414  | -1.356544 | -1.421414 |
| H | -2.367086 | 1.881187  | -1.686898 |
| H | -2.336946 | 3.602443  | -0.987272 |
| H | 2.729465  | 1.621336  | -1.658574 |
| H | 1.575237  | 1.224166  | 1.098911  |
| H | 3.435409  | 2.540837  | -0.328052 |
| H | 0.574004  | -1.235137 | 2.352097  |
| H | 2.313634  | -1.562175 | 2.310984  |
| H | 1.175141  | -2.892773 | 2.350645  |
| H | 4.677076  | -3.718482 | -0.869458 |
| H | -3.897950 | -0.431629 | -1.415768 |

|   |           |           |           |
|---|-----------|-----------|-----------|
| H | -3.575787 | -2.136939 | -1.184442 |
| H | -4.817262 | -2.061406 | 0.993451  |
| H | -6.297487 | -0.137024 | 1.487212  |
| H | -4.612157 | 0.378174  | 1.471009  |
| H | -5.660296 | 0.735595  | 0.092132  |
| H | -7.083308 | -2.009485 | -0.043985 |
| H | -5.930803 | -2.858842 | -1.077587 |
| H | -6.421132 | -1.207791 | -1.468917 |

mPW1PW91 energy = -1155.17125786 a.u.

(2R,6R,7S,8S)-1, Conf. I

|   |           |           |           |
|---|-----------|-----------|-----------|
| C | 3.969357  | -1.639816 | -0.421034 |
| C | 3.474980  | -0.322469 | -0.921068 |
| C | 3.464432  | 0.835255  | -0.257658 |
| C | 4.232484  | 1.124643  | 0.995996  |
| C | 1.636051  | -1.852560 | 0.523780  |
| C | 2.755351  | -2.570594 | -0.184673 |
| C | 1.201171  | 1.764837  | 0.141879  |
| C | 0.009912  | 1.052903  | -0.557275 |
| C | -0.340508 | -0.275963 | 0.155387  |
| C | 0.676032  | -1.301797 | -0.220359 |
| O | 0.724945  | 3.075664  | 0.530025  |
| C | -0.555828 | 3.283416  | 0.195715  |
| C | -1.060675 | 2.104740  | -0.542752 |
| O | -1.128656 | 4.305512  | 0.469049  |
| C | -2.242467 | 2.131584  | -1.143325 |
| C | 2.502344  | 1.921994  | -0.665684 |
| C | 1.776796  | -1.698794 | 2.003553  |
| O | 4.803603  | -2.321746 | -1.355440 |
| O | -1.636618 | -0.701438 | -0.320630 |
| C | -2.339854 | -1.503246 | 0.496786  |
| O | -1.975132 | -1.798281 | 1.608060  |
| C | -3.610375 | -1.987753 | -0.141740 |
| C | -4.638577 | -0.887111 | -0.435943 |
| C | -5.873476 | -1.499641 | -1.084391 |
| C | -5.007981 | -0.109209 | 0.820541  |
| H | 4.508578  | -1.516165 | 0.521741  |
| H | 2.896277  | -0.385699 | -1.840493 |
| H | 4.879882  | 0.306653  | 1.306942  |
| H | 3.570063  | 1.372917  | 1.830977  |
| H | 3.094865  | -3.447899 | 0.371561  |
| H | 2.418149  | -2.906089 | -1.168059 |
| H | 4.861931  | 2.006180  | 0.837002  |
| H | 0.273752  | 0.815532  | -1.589898 |
| H | -0.408303 | -0.115567 | 1.229570  |
| H | 0.689010  | -1.504188 | -1.289221 |
| H | -2.600200 | 1.309302  | -1.747190 |
| H | -2.874147 | 3.006745  | -1.041179 |
| H | 2.288724  | 1.890795  | -1.735767 |
| H | 1.428579  | 1.261347  | 1.082318  |
| H | 2.914620  | 2.907202  | -0.435000 |
| H | 1.843270  | -2.685591 | 2.472128  |
| H | 0.944864  | -1.167821 | 2.463109  |
| H | 2.703834  | -1.175654 | 2.257285  |
| H | 5.573346  | -1.768094 | -1.521215 |
| H | -3.343211 | -2.494001 | -1.073613 |



|   |           |           |           |
|---|-----------|-----------|-----------|
| H | -4.039802 | -2.728391 | 0.534488  |
| H | -4.189469 | -0.192101 | -1.150980 |
| H | -6.602947 | -0.726783 | -1.337917 |
| H | -5.622449 | -2.036191 | -2.002769 |
| H | -6.361379 | -2.206663 | -0.407249 |
| H | -5.740252 | 0.668654  | 0.592383  |
| H | -4.140947 | 0.379965  | 1.271003  |
| H | -5.446799 | -0.768594 | 1.575141  |

mPW1PW91 energy = -1155.17082270 a.u.

(2R,6R,7S,8S)-1, Conf. J

|   |           |           |           |
|---|-----------|-----------|-----------|
| C | 3.998781  | -1.630381 | -0.396524 |
| C | 3.524476  | -0.288152 | -0.847784 |
| C | 3.487156  | 0.834418  | -0.127259 |
| C | 4.193257  | 1.054356  | 1.176143  |
| C | 1.632962  | -1.880093 | 0.450874  |
| C | 2.778611  | -2.570510 | -0.242264 |
| C | 1.212457  | 1.766111  | 0.201939  |
| C | 0.067160  | 1.070088  | -0.583296 |
| C | -0.321423 | -0.280096 | 0.067416  |
| C | 0.702815  | -1.298324 | -0.307254 |
| O | 0.708884  | 3.065033  | 0.595532  |
| C | -0.548120 | 3.281737  | 0.184785  |
| C | -1.006803 | 2.118500  | -0.606143 |
| O | -1.136615 | 4.298791  | 0.443293  |
| C | -2.157649 | 2.150708  | -1.264420 |
| C | 2.555023  | 1.950163  | -0.526809 |
| C | 1.717360  | -1.787129 | 1.939862  |
| O | 4.861381  | -2.267569 | -1.336858 |
| O | -1.602326 | -0.668582 | -0.472188 |
| C | -2.348796 | -1.491830 | 0.282857  |
| O | -2.013266 | -1.872044 | 1.377305  |
| C | -3.637741 | -1.851117 | -0.396719 |
| C | -4.734468 | -0.784846 | -0.227168 |
| C | -5.955918 | -1.182199 | -1.046094 |
| C | -5.102599 | -0.568809 | 1.234879  |
| H | 4.509442  | -1.552961 | 0.566487  |
| H | 2.989940  | -0.300482 | -1.795525 |
| H | 4.857434  | 1.920195  | 1.085571  |
| H | 4.795866  | 0.205285  | 1.493901  |
| H | 3.098495  | -3.468388 | 0.292365  |
| H | 2.479351  | -2.868382 | -1.249745 |
| H | 3.491980  | 1.294100  | 1.981252  |
| H | 0.393049  | 0.861913  | -1.604509 |
| H | -0.429718 | -0.159112 | 1.143513  |
| H | 0.757451  | -1.458021 | -1.382185 |
| H | -2.480647 | 1.337676  | -1.899673 |
| H | -2.797941 | 3.021464  | -1.179015 |
| H | 2.396294  | 1.977184  | -1.606581 |
| H | 1.389920  | 1.237892  | 1.139600  |
| H | 2.962384  | 2.917253  | -0.222579 |
| H | 0.870992  | -1.270227 | 2.388963  |
| H | 2.636153  | -1.280632 | 2.250788  |
| H | 1.760675  | -2.793062 | 2.368668  |
| H | 5.638595  | -1.710752 | -1.448375 |
| H | -3.442019 | -2.001639 | -1.460129 |

|   |           |           |           |
|---|-----------|-----------|-----------|
| H | -3.977991 | -2.795919 | 0.030711  |
| H | -4.348864 | 0.159273  | -0.625644 |
| H | -6.736914 | -0.421606 | -0.973772 |
| H | -5.708027 | -1.307097 | -2.103033 |
| H | -6.377244 | -2.126008 | -0.687792 |
| H | -5.883846 | 0.189587  | 1.324713  |
| H | -4.248793 | -0.236343 | 1.828408  |
| H | -5.479731 | -1.491791 | 1.684819  |

mPW1PW91 energy = -1155.17081948 a.u.

(2R,6R,7S,8S)-1, Conf. K

|   |           |           |           |
|---|-----------|-----------|-----------|
| C | 3.146606  | -2.530972 | -0.377142 |
| C | 3.084761  | -1.156062 | -0.958470 |
| C | 3.461036  | -0.019363 | -0.371064 |
| C | 4.325201  | 0.077577  | 0.848972  |
| C | 0.910471  | -1.922082 | 0.639696  |
| C | 1.695275  | -2.994951 | -0.068803 |
| C | 1.670390  | 1.659670  | 0.030582  |
| C | 0.259042  | 1.339377  | -0.534145 |
| C | -0.435676 | 0.215803  | 0.271753  |
| C | 0.163155  | -1.098690 | -0.097674 |
| O | 1.696801  | 3.084884  | 0.282680  |
| C | 0.521739  | 3.677952  | 0.034847  |
| C | -0.425661 | 2.676192  | -0.503502 |
| O | 0.347090  | 4.852605  | 0.227464  |
| C | -1.626835 | 3.042194  | -0.930894 |
| C | 2.886263  | 1.293086  | -0.838515 |
| C | 1.158906  | -1.784127 | 2.106920  |
| O | 3.801515  | -3.486591 | -1.202716 |
| O | -1.829736 | 0.208777  | -0.104555 |
| C | -2.733397 | -0.016472 | 0.862745  |
| O | -2.445353 | -0.162272 | 2.024983  |
| C | -4.128827 | -0.055600 | 0.309609  |
| C | -4.390645 | -1.242529 | -0.629435 |
| C | -4.174354 | -2.574205 | 0.078363  |
| C | -5.800470 | -1.145006 | -1.197871 |
| H | 3.720566  | -2.529543 | 0.548148  |
| H | 2.478108  | -1.076221 | -1.859909 |
| H | 5.206590  | 0.684853  | 0.618427  |
| H | 4.675218  | -0.888082 | 1.208858  |
| H | 1.747508  | -3.917990 | 0.513857  |
| H | 1.217251  | -3.228823 | -1.025115 |
| H | 3.813408  | 0.585915  | 1.671776  |
| H | 0.345717  | 1.000785  | -1.569314 |
| H | -0.372306 | 0.428709  | 1.336717  |
| H | 0.060121  | -1.325025 | -1.156719 |
| H | -2.320801 | 2.344977  | -1.378963 |
| H | -1.928446 | 4.079731  | -0.840247 |
| H | 2.596627  | 1.252401  | -1.890239 |
| H | 1.781738  | 1.197574  | 1.012664  |
| H | 3.619962  | 2.094812  | -0.724227 |
| H | 0.899360  | -2.718322 | 2.614222  |
| H | 0.582359  | -0.983719 | 2.567420  |
| H | 2.219468  | -1.608660 | 2.310664  |
| H | 3.357822  | -3.503696 | -2.057636 |
| H | -4.811950 | -0.090783 | 1.159294  |

|   |           |           |           |
|---|-----------|-----------|-----------|
| H | -4.304232 | 0.879604  | -0.229071 |
| H | -3.680557 | -1.173840 | -1.459530 |
| H | -4.364855 | -3.408455 | -0.600798 |
| H | -3.152525 | -2.679480 | 0.450785  |
| H | -4.851151 | -2.678168 | 0.931438  |
| H | -6.001901 | -1.971002 | -1.883927 |
| H | -5.948567 | -0.211390 | -1.746265 |
| H | -6.548933 | -1.186139 | -0.401011 |

mPW1PW91 energy = -1155.17072109 a.u.

(2R,6R,7S,8S)-1, Conf. L

|   |           |           |           |
|---|-----------|-----------|-----------|
| C | 3.120324  | -2.523954 | -0.408980 |
| C | 3.050601  | -1.154890 | -0.992024 |
| C | 3.435120  | -0.019456 | -0.408197 |
| C | 4.317746  | 0.078841  | 0.798857  |
| C | 0.914608  | -1.898583 | 0.679001  |
| C | 1.676157  | -2.976772 | -0.045858 |
| C | 1.664972  | 1.675649  | 0.020205  |
| C | 0.240754  | 1.352756  | -0.509016 |
| C | -0.434807 | 0.240861  | 0.326905  |
| C | 0.154007  | -1.077138 | -0.046491 |
| O | 1.700408  | 3.103739  | 0.255484  |
| C | 0.522008  | 3.697233  | 0.025231  |
| C | -0.438879 | 2.692319  | -0.482354 |
| O | 0.354313  | 4.874426  | 0.209080  |
| C | -1.645200 | 3.057114  | -0.895965 |
| C | 2.859687  | 1.294448  | -0.870833 |
| C | 1.190932  | -1.754349 | 2.140533  |
| O | 3.688157  | -3.417864 | -1.360498 |
| O | -1.839040 | 0.241735  | -0.010672 |
| C | -2.695973 | -0.143216 | 0.947857  |
| O | -2.353251 | -0.435655 | 2.067040  |
| C | -4.114337 | -0.145465 | 0.453589  |
| C | -4.385726 | -1.146544 | -0.678379 |
| C | -4.075454 | -2.575329 | -0.249761 |
| C | -5.831364 | -1.016649 | -1.140047 |
| H | 3.729932  | -2.523126 | 0.497891  |
| H | 2.440143  | -1.083331 | -1.889708 |
| H | 3.816014  | 0.578810  | 1.632823  |
| H | 5.190737  | 0.693942  | 0.557431  |
| H | 1.738278  | -3.893723 | 0.548830  |
| H | 1.175125  | -3.218127 | -0.986228 |
| H | 4.680107  | -0.885891 | 1.148854  |
| H | 0.304111  | 1.000322  | -1.541143 |
| H | -0.341301 | 0.463706  | 1.388035  |
| H | 0.029254  | -1.307936 | -1.102112 |
| H | -2.348912 | 2.355947  | -1.322212 |
| H | -1.941181 | 4.097206  | -0.816400 |
| H | 2.549086  | 1.249892  | -1.916346 |
| H | 1.797273  | 1.225098  | 1.005055  |
| H | 3.601691  | 2.091107  | -0.775431 |
| H | 2.255346  | -1.580395 | 2.325187  |
| H | 0.936738  | -2.684741 | 2.657702  |
| H | 0.624171  | -0.950188 | 2.606436  |
| H | 3.661400  | -4.307358 | -0.992265 |
| H | -4.752446 | -0.365619 | 1.310504  |

|   |           |           |           |
|---|-----------|-----------|-----------|
| H | -4.349755 | 0.865554  | 0.108777  |
| H | -3.733191 | -0.887563 | -1.517979 |
| H | -4.286605 | -3.275871 | -1.061064 |
| H | -3.026936 | -2.702502 | 0.029926  |
| H | -4.685947 | -2.867087 | 0.609775  |
| H | -6.036727 | -1.695082 | -1.971382 |
| H | -6.057499 | -0.000773 | -1.473125 |
| H | -6.524658 | -1.264587 | -0.330942 |

mPW1PW91 energy = -1155.17070672 a.u.

(2R,6R,7S,8S)-1, Conf. M

|   |           |           |           |
|---|-----------|-----------|-----------|
| C | 3.008943  | -2.642105 | -0.283658 |
| C | 3.062199  | -1.251317 | -0.823647 |
| C | 3.461274  | -0.153965 | -0.177918 |
| C | 4.240888  | -0.132469 | 1.101516  |
| C | 0.739883  | -1.934914 | 0.570522  |
| C | 1.526533  | -3.040357 | -0.084896 |
| C | 1.721433  | 1.597418  | 0.120878  |
| C | 0.354573  | 1.371158  | -0.582437 |
| C | -0.473235 | 0.265101  | 0.115391  |
| C | 0.100077  | -1.070300 | -0.218586 |
| O | 1.793979  | 3.009662  | 0.430832  |
| C | 0.678071  | 3.672141  | 0.099480  |
| C | -0.261394 | 2.741629  | -0.565975 |
| O | 0.543849  | 4.846408  | 0.324357  |
| C | -1.397263 | 3.186147  | -1.087343 |
| C | 2.993886  | 1.199654  | -0.648395 |
| C | 0.866875  | -1.821420 | 2.055204  |
| O | 3.556323  | -3.614899 | -1.171562 |
| O | -1.813594 | 0.336362  | -0.417156 |
| C | -2.834716 | 0.165240  | 0.438488  |
| O | -2.688002 | -0.022119 | 1.621306  |
| C | -4.164096 | 0.242912  | -0.258194 |
| C | -4.849595 | -1.124032 | -0.455390 |
| C | -4.006374 | -2.071533 | -1.299875 |
| C | -5.258475 | -1.771861 | 0.860557  |
| H | 3.523267  | -2.701599 | 0.679092  |
| H | 2.533063  | -1.119079 | -1.765133 |
| H | 5.167395  | 0.430626  | 0.948394  |
| H | 4.511170  | -1.123231 | 1.462582  |
| H | 1.490615  | -3.966148 | 0.494909  |
| H | 1.120101  | -3.249982 | -1.076804 |
| H | 3.700490  | 0.386682  | 1.898795  |
| H | 0.518783  | 1.058289  | -1.616202 |
| H | -0.521533 | 0.453707  | 1.185825  |
| H | 0.082799  | -1.280768 | -1.285691 |
| H | -2.080039 | 2.543478  | -1.625162 |
| H | -1.653479 | 4.234595  | -0.983095 |
| H | 2.801928  | 1.206781  | -1.722868 |
| H | 1.720157  | 1.095614  | 1.089703  |
| H | 3.750214  | 1.959862  | -0.438482 |
| H | 0.523871  | -2.747425 | 2.526709  |
| H | 0.289774  | -0.999648 | 2.475945  |
| H | 1.912998  | -1.696055 | 2.350515  |
| H | 4.483215  | -3.395947 | -1.311079 |
| H | -4.804913 | 0.878861  | 0.356105  |

|   |           |           |           |
|---|-----------|-----------|-----------|
| H | -4.030640 | 0.723058  | -1.227889 |
| H | -5.763888 | -0.900484 | -1.015401 |
| H | -4.565072 | -2.982884 | -1.525245 |
| H | -3.714413 | -1.616597 | -2.249439 |
| H | -3.093629 | -2.369464 | -0.776568 |
| H | -5.825359 | -2.687006 | 0.672272  |
| H | -5.886263 | -1.105747 | 1.457334  |
| H | -4.387983 | -2.035579 | 1.464329  |

mPW1PW91 energy = -1155.16980682 a.u.

(2S,6R,7S,8S)-1, Conf. A

|   |           |           |           |
|---|-----------|-----------|-----------|
| C | -2.903070 | -2.733855 | -0.046143 |
| C | -3.244296 | -1.297638 | -0.280227 |
| C | -3.334878 | -0.323932 | 0.628613  |
| C | -3.380239 | -0.528692 | 2.111476  |
| C | -0.517109 | -1.971657 | -0.159849 |
| C | -1.492636 | -3.025414 | -0.612088 |
| C | -2.020138 | 1.450750  | -0.586146 |
| C | -0.694439 | 1.238318  | 0.187436  |
| C | 0.312447  | 0.402287  | -0.635501 |
| C | -0.271983 | -0.940818 | -0.971588 |
| O | -2.054360 | 2.849443  | -0.956301 |
| C | -1.086569 | 3.558268  | -0.354811 |
| C | -0.241429 | 2.642652  | 0.447891  |
| O | -0.987069 | 4.748875  | -0.493494 |
| C | 0.708756  | 3.102305  | 1.250655  |
| C | -3.299461 | 1.123938  | 0.182849  |
| C | -0.020106 | -2.113380 | 1.245069  |
| O | -3.785589 | -3.629070 | -0.719534 |
| O | 1.519797  | 0.335284  | 0.142818  |
| C | 2.659969  | 0.113218  | -0.531708 |
| O | 2.701879  | -0.046491 | -1.725152 |
| C | 3.851790  | 0.145096  | 0.383283  |
| C | 5.028218  | -0.701402 | -0.095600 |
| C | 6.268428  | -0.389305 | 0.731238  |
| C | 4.697587  | -2.188107 | -0.047471 |
| H | -2.906505 | -2.959864 | 1.023520  |
| H | -3.254539 | -1.019450 | -1.332827 |
| H | -2.504359 | -0.091330 | 2.601629  |
| H | -3.449461 | -1.575351 | 2.403692  |
| H | -1.573822 | -3.028088 | -1.701323 |
| H | -1.194830 | -4.028442 | -0.294387 |
| H | -4.250030 | -0.007637 | 2.524555  |
| H | -0.880913 | 0.702072  | 1.117830  |
| H | 0.544944  | 0.930673  | -1.561341 |
| H | -0.681732 | -0.993028 | -1.975147 |
| H | 1.311494  | 2.446362  | 1.865051  |
| H | 0.896577  | 4.168752  | 1.304766  |
| H | -3.364495 | 1.785579  | 1.050365  |
| H | -2.016406 | 0.906181  | -1.528064 |
| H | -4.149213 | 1.363376  | -0.461896 |
| H | 0.529479  | -1.245174 | 1.598863  |
| H | 0.645806  | -2.980632 | 1.312474  |
| H | -0.846155 | -2.312434 | 1.932873  |
| H | -4.675736 | -3.470160 | -0.389434 |

|   |          |           |           |
|---|----------|-----------|-----------|
| H | 4.148049 | 1.198986  | 0.443443  |
| H | 3.540022 | -0.145680 | 1.389108  |
| H | 5.227838 | -0.427823 | -1.135798 |
| H | 7.123942 | -0.975430 | 0.387922  |
| H | 6.539237 | 0.667424  | 0.664033  |
| H | 6.108959 | -0.625663 | 1.787742  |
| H | 5.530538 | -2.784706 | -0.426596 |
| H | 3.819628 | -2.427473 | -0.651367 |
| H | 4.499368 | -2.511143 | 0.979339  |

mPW1PW91 energy = -1155.17190060 a.u.

(2S,6R,7S,8S)-1, Conf. B

|   |           |           |           |
|---|-----------|-----------|-----------|
| C | -3.507714 | -2.233559 | -0.111290 |
| C | -3.529497 | -0.753410 | -0.316982 |
| C | -3.411186 | 0.200432  | 0.609824  |
| C | -3.504640 | -0.016564 | 2.088888  |
| C | -1.010398 | -2.000356 | -0.167946 |
| C | -2.181013 | -2.807963 | -0.662155 |
| C | -1.725602 | 1.654157  | -0.564560 |
| C | -0.484721 | 1.172594  | 0.227018  |
| C | 0.332754  | 0.141845  | -0.584437 |
| C | -0.524647 | -1.036877 | -0.953573 |
| O | -1.456448 | 3.023533  | -0.945768 |
| C | -0.368482 | 3.517538  | -0.334985 |
| C | 0.248055  | 2.452994  | 0.492088  |
| O | -0.015645 | 4.657656  | -0.483685 |
| C | 1.249951  | 2.710807  | 1.321589  |
| C | -3.055243 | 1.611599  | 0.186634  |
| C | -0.595243 | -2.270253 | 1.244352  |
| O | -4.547066 | -2.904697 | -0.820843 |
| O | 1.478197  | -0.195445 | 0.216572  |
| C | 2.533257  | -0.710928 | -0.437311 |
| O | 2.566058  | -0.847459 | -1.633777 |
| C | 3.618632  | -1.124573 | 0.515808  |
| C | 5.014562  | -1.150325 | -0.099414 |
| C | 5.491456  | 0.252689  | -0.454142 |
| C | 5.991442  | -1.837044 | 0.846369  |
| H | -3.582382 | -2.476532 | 0.952155  |
| H | -3.474117 | -0.461069 | -1.364548 |
| H | -3.805036 | -1.027246 | 2.360662  |
| H | -4.237681 | 0.676588  | 2.514474  |
| H | -2.238295 | -2.769708 | -1.752134 |
| H | -2.112083 | -3.858042 | -0.365592 |
| H | -2.554629 | 0.204526  | 2.585858  |
| H | -0.787973 | 0.693900  | 1.157656  |
| H | 0.696603  | 0.614324  | -1.497990 |
| H | -0.912861 | -0.983099 | -1.965723 |
| H | 1.682639  | 1.948980  | 1.956718  |
| H | 1.655578  | 3.714633  | 1.380396  |
| H | -2.986575 | 2.263413  | 1.061324  |
| H | -1.824371 | 1.110899  | -1.501841 |
| H | -3.822098 | 2.036802  | -0.466176 |
| H | -0.169653 | -3.277112 | 1.315818  |
| H | -1.461043 | -2.260032 | 1.912237  |
| H | 0.144475  | -1.568005 | 1.619738  |
| H | -5.388049 | -2.549744 | -0.515399 |

|   |          |           |           |
|---|----------|-----------|-----------|
| H | 3.586887 | -0.480372 | 1.397737  |
| H | 3.340135 | -2.128275 | 0.858895  |
| H | 4.957174 | -1.736515 | -1.021283 |
| H | 6.474203 | 0.220278  | -0.930001 |
| H | 4.807120 | 0.749800  | -1.144704 |
| H | 5.578326 | 0.874147  | 0.442628  |
| H | 6.991566 | -1.880704 | 0.409051  |
| H | 5.680791 | -2.860612 | 1.070655  |
| H | 6.070245 | -1.296747 | 1.794729  |

mPW1PW91 energy = -1155.17188881 a.u.

(2S,6R,7S,8S)-1, Conf. C

|   |           |           |           |
|---|-----------|-----------|-----------|
| C | -3.136722 | -2.658498 | 0.165232  |
| C | -3.361425 | -1.177195 | 0.136517  |
| C | -3.168858 | -0.291905 | 1.113478  |
| C | -2.903408 | -0.648326 | 2.540903  |
| C | -0.817778 | -1.934004 | -0.638460 |
| C | -1.622770 | -3.006038 | 0.045477  |
| C | -1.925599 | 1.472646  | -0.184828 |
| C | -0.498923 | 1.415806  | 0.420584  |
| C | 0.343751  | 0.301813  | -0.235666 |
| C | -0.221319 | -1.025801 | 0.136245  |
| O | -2.098260 | 2.809856  | -0.709251 |
| C | -1.017362 | 3.580321  | -0.528328 |
| C | 0.014682  | 2.809591  | 0.202951  |
| O | -0.972507 | 4.717584  | -0.918217 |
| C | 1.144460  | 3.383958  | 0.594525  |
| C | -3.093734 | 1.178644  | 0.754659  |
| C | -0.877132 | -1.895889 | -2.130926 |
| O | -3.802620 | -3.291662 | -0.925264 |
| O | 1.678261  | 0.424990  | 0.307446  |
| C | 2.692306  | 0.012261  | -0.467875 |
| O | 2.544339  | -0.408726 | -1.588051 |
| C | 4.022892  | 0.168469  | 0.214579  |
| C | 4.926713  | -1.055091 | 0.046125  |
| C | 6.334121  | -0.743281 | 0.537016  |
| C | 4.349928  | -2.269090 | 0.764393  |
| H | -3.494694 | -3.097403 | 1.102204  |
| H | -3.536314 | -0.795015 | -0.867615 |
| H | -1.906086 | -0.318877 | 2.850539  |
| H | -2.977809 | -1.718235 | 2.732697  |
| H | -1.555995 | -3.964473 | -0.475185 |
| H | -1.237787 | -3.149278 | 1.056323  |
| H | -3.613009 | -0.135830 | 3.198451  |
| H | -0.555923 | 1.201669  | 1.490312  |
| H | 0.394737  | 0.455505  | -1.311923 |
| H | -0.250860 | -1.186650 | 1.211822  |
| H | 1.895295  | 2.855585  | 1.165841  |
| H | 1.329377  | 4.422290  | 0.342618  |
| H | -3.000851 | 1.795419  | 1.651980  |
| H | -1.993496 | 0.811268  | -1.048816 |
| H | -4.005742 | 1.494784  | 0.241791  |
| H | -0.502503 | -2.839838 | -2.538275 |
| H | -0.289875 | -1.088520 | -2.565094 |
| H | -1.910718 | -1.806888 | -2.478233 |
| H | -4.738122 | -3.070014 | -0.871374 |

|   |          |           |           |
|---|----------|-----------|-----------|
| H | 4.497201 | 1.042826  | -0.243707 |
| H | 3.869807 | 0.396793  | 1.270962  |
| H | 4.974940 | -1.279055 | -1.023649 |
| H | 6.993038 | -1.604221 | 0.402378  |
| H | 6.770878 | 0.098282  | -0.006410 |
| H | 6.334969 | -0.490490 | 1.601616  |
| H | 4.977392 | -3.149498 | 0.607735  |
| H | 3.346562 | -2.514086 | 0.407413  |
| H | 4.288952 | -2.092731 | 1.842690  |

mPW1PW91 energy = -1155.17177404 a.u.

(2S,6R,7S,8S)-1, Conf. D

|   |           |           |           |
|---|-----------|-----------|-----------|
| C | -3.494096 | -2.384165 | 0.212515  |
| C | -3.541710 | -0.892420 | 0.080004  |
| C | -3.313874 | 0.031359  | 1.012908  |
| C | -3.173748 | -0.251529 | 2.474645  |
| C | -1.071516 | -1.978464 | -0.502631 |
| C | -2.027834 | -2.912621 | 0.189277  |
| C | -1.797989 | 1.551828  | -0.295572 |
| C | -0.436275 | 1.354922  | 0.417213  |
| C | 0.319578  | 0.130366  | -0.145046 |
| C | -0.401445 | -1.110275 | 0.258036  |
| O | -1.761333 | 2.866595  | -0.898519 |
| C | -0.616740 | 3.517640  | -0.650152 |
| C | 0.247751  | 2.673663  | 0.206531  |
| O | -0.403809 | 4.620446  | -1.081115 |
| C | 1.387633  | 3.139940  | 0.698829  |
| C | -3.051711 | 1.457465  | 0.571657  |
| C | -1.066566 | -2.008190 | -1.996494 |
| O | -4.183069 | -3.008951 | -0.868816 |
| O | 1.631094  | 0.141140  | 0.460604  |
| C | 2.672312  | -0.224788 | -0.303327 |
| O | 2.568807  | -0.563502 | -1.455363 |
| C | 3.967721  | -0.106612 | 0.451064  |
| C | 5.056660  | -1.064569 | -0.024528 |
| C | 6.399208  | -0.672439 | 0.579101  |
| C | 4.705074  | -2.509602 | 0.306801  |
| H | -3.940973 | -2.714642 | 1.155439  |
| H | -3.609786 | -0.563949 | -0.955779 |
| H | -3.395887 | -1.286773 | 2.732228  |
| H | -2.159875 | -0.026313 | 2.822123  |
| H | -2.052354 | -3.898645 | -0.281118 |
| H | -1.709217 | -3.045298 | 1.224387  |
| H | -3.844324 | 0.393083  | 3.051704  |
| H | -0.593495 | 1.180893  | 1.484048  |
| H | 0.438313  | 0.222654  | -1.222659 |
| H | -0.495094 | -1.214155 | 1.336903  |
| H | 2.010006  | 2.558869  | 1.365658  |
| H | 1.712133  | 4.140764  | 0.436643  |
| H | -2.944748 | 2.118995  | 1.435036  |
| H | -1.891319 | 0.854001  | -1.127451 |
| H | -3.886908 | 1.836957  | -0.022585 |
| H | -0.372809 | -1.295061 | -2.438955 |
| H | -2.068178 | -1.819489 | -2.393770 |
| H | -0.787140 | -3.007748 | -2.343279 |
| H | -5.090441 | -2.686585 | -0.869501 |

|   |          |           |           |
|---|----------|-----------|-----------|
| H | 4.296866 | 0.929919  | 0.312476  |
| H | 3.772336 | -0.229765 | 1.518830  |
| H | 5.125816 | -0.969182 | -1.112095 |
| H | 7.191962 | -1.341026 | 0.235722  |
| H | 6.679280 | 0.347171  | 0.302102  |
| H | 6.373103 | -0.725091 | 1.671933  |
| H | 5.465671 | -3.194203 | -0.075905 |
| H | 3.748197 | -2.802620 | -0.130696 |
| H | 4.640743 | -2.657644 | 1.389228  |

mPW1PW91 energy = -1155.17174391 a.u.

(2S,6R,7S,8S)-1, Conf. E

|   |           |           |           |
|---|-----------|-----------|-----------|
| C | -3.995025 | -1.829463 | 0.168128  |
| C | -3.731685 | -0.362680 | 0.017078  |
| C | -3.346748 | 0.510561  | 0.946819  |
| C | -3.310327 | 0.227524  | 2.414482  |
| C | -1.516927 | -1.938475 | -0.458716 |
| C | -2.669629 | -2.649280 | 0.197558  |
| C | -1.505983 | 1.666395  | -0.316120 |
| C | -0.238978 | 1.210535  | 0.452443  |
| C | 0.261989  | -0.156563 | -0.063626 |
| C | -0.713247 | -1.215027 | 0.323726  |
| O | -1.180660 | 2.934532  | -0.932016 |
| C | 0.067720  | 3.337496  | -0.658048 |
| C | 0.711864  | 2.351807  | 0.240483  |
| O | 0.518918  | 4.361157  | -1.100486 |
| C | 1.912543  | 2.577801  | 0.756598  |
| C | -2.785326 | 1.844686  | 0.498607  |
| C | -1.458264 | -1.986482 | -1.951085 |
| O | -4.767239 | -2.318732 | -0.926544 |
| O | 1.525294  | -0.415526 | 0.588483  |
| C | 2.481325  | -1.020876 | -0.133644 |
| O | 2.368095  | -1.283679 | -1.304694 |
| C | 3.675615  | -1.365269 | 0.711773  |
| C | 5.004300  | -1.299540 | -0.038057 |
| C | 5.361344  | 0.135424  | -0.407160 |
| C | 6.108200  | -1.946227 | 0.788612  |
| H | -4.526765 | -2.042695 | 1.100981  |
| H | -3.700815 | -0.043965 | -1.023406 |
| H | -3.844991 | 1.007777  | 2.965347  |
| H | -2.281563 | 0.237574  | 2.789586  |
| H | -2.880644 | -3.611657 | -0.275011 |
| H | -2.421614 | -2.839412 | 1.242930  |
| H | -3.753698 | -0.733753 | 2.672953  |
| H | -0.464779 | 1.102564  | 1.515542  |
| H | 0.434154  | -0.109375 | -1.136774 |
| H | -0.862181 | -1.283183 | 1.399444  |
| H | 2.380811  | 1.893471  | 1.450775  |
| H | 2.449253  | 3.480276  | 0.486140  |
| H | -2.582835 | 2.492288  | 1.355393  |
| H | -1.707505 | 0.985382  | -1.143192 |
| H | -3.502822 | 2.369175  | -0.137498 |
| H | -0.605033 | -1.452253 | -2.366199 |
| H | -2.374626 | -1.583174 | -2.392195 |
| H | -1.396811 | -3.027295 | -2.282785 |
| H | -5.585657 | -1.812768 | -0.962947 |

|   |          |           |           |
|---|----------|-----------|-----------|
| H | 3.689144 | -0.730820 | 1.600551  |
| H | 3.496588 | -2.388396 | 1.062995  |
| H | 4.885172 | -1.871666 | -0.962745 |
| H | 6.292647 | 0.172317  | -0.977074 |
| H | 4.584856 | 0.603016  | -1.016974 |
| H | 5.498819 | 0.747221  | 0.489865  |
| H | 7.059480 | -1.926585 | 0.251813  |
| H | 5.876312 | -2.989369 | 1.017896  |
| H | 6.253263 | -1.420790 | 1.737523  |

mPW1PW91 energy = -1155.17172100 a.u.

(2S,6R,7S,8S)-1, Conf. F

|   |           |           |           |
|---|-----------|-----------|-----------|
| C | -3.157392 | -2.654408 | 0.154675  |
| C | -3.387026 | -1.177075 | 0.142523  |
| C | -3.159421 | -0.300534 | 1.118355  |
| C | -2.856897 | -0.668902 | 2.535519  |
| C | -0.824194 | -1.929798 | -0.619003 |
| C | -1.630904 | -2.992444 | 0.074531  |
| C | -1.928920 | 1.473894  | -0.175928 |
| C | -0.498439 | 1.422095  | 0.421248  |
| C | 0.342020  | 0.306670  | -0.234879 |
| C | -0.220237 | -1.019157 | 0.147070  |
| O | -2.109809 | 2.811917  | -0.696293 |
| C | -1.029058 | 3.584305  | -0.525956 |
| C | 0.011511  | 2.816083  | 0.196104  |
| O | -0.989583 | 4.721644  | -0.916529 |
| C | 1.144131  | 3.393044  | 0.575395  |
| C | -3.091886 | 1.171936  | 0.767413  |
| C | -0.895673 | -1.897975 | -2.111215 |
| O | -3.875265 | -3.178477 | -0.957660 |
| O | 1.679307  | 0.434029  | 0.300635  |
| C | 2.688044  | 0.003164  | -0.471432 |
| O | 2.532987  | -0.438868 | -1.582536 |
| C | 4.022456  | 0.169112  | 0.201410  |
| C | 4.930102  | -1.051914 | 0.037631  |
| C | 6.339562  | -0.729988 | 0.516063  |
| C | 4.363467  | -2.261675 | 0.771129  |
| H | -3.539062 | -3.109441 | 1.075012  |
| H | -3.605684 | -0.792807 | -0.851444 |
| H | -3.552628 | -0.164441 | 3.213865  |
| H | -1.853319 | -0.341818 | 2.826584  |
| H | -1.531940 | -3.964726 | -0.418632 |
| H | -1.266084 | -3.108377 | 1.097075  |
| H | -2.928187 | -1.740766 | 2.718168  |
| H | -0.549387 | 1.211677  | 1.492017  |
| H | 0.387014  | 0.455487  | -1.312119 |
| H | -0.242450 | -1.174218 | 1.223480  |
| H | 1.901656  | 2.867285  | 1.140257  |
| H | 1.324286  | 4.431314  | 0.319799  |
| H | -2.998194 | 1.785567  | 1.666843  |
| H | -1.998859 | 0.813992  | -1.040947 |
| H | -4.006698 | 1.485733  | 0.258391  |
| H | -1.932498 | -1.810520 | -2.448912 |
| H | -0.522619 | -2.842700 | -2.518773 |
| H | -0.312619 | -1.091914 | -2.553233 |
| H | -3.756889 | -4.133208 | -0.967558 |

|   |          |           |           |
|---|----------|-----------|-----------|
| H | 4.490465 | 1.041921  | -0.266353 |
| H | 3.874834 | 0.405871  | 1.256744  |
| H | 4.971913 | -1.285641 | -1.030318 |
| H | 7.001034 | -1.589599 | 0.385481  |
| H | 6.769427 | 0.107966  | -0.038295 |
| H | 6.346405 | -0.466738 | 1.578095  |
| H | 4.992984 | -3.141131 | 0.617332  |
| H | 3.358188 | -2.513317 | 0.424294  |
| H | 4.310332 | -2.076009 | 1.848288  |

mPW1PW91 energy = -1155.17129978 a.u.

(2S,6R,7S,8S)-1, Conf. G

|   |           |           |           |
|---|-----------|-----------|-----------|
| C | -3.520892 | -2.371525 | 0.195264  |
| C | -3.569875 | -0.881806 | 0.082099  |
| C | -3.307481 | 0.027083  | 1.018745  |
| C | -3.137940 | -0.274008 | 2.473579  |
| C | -1.082741 | -1.971448 | -0.482679 |
| C | -2.044111 | -2.892635 | 0.216672  |
| C | -1.798293 | 1.554768  | -0.285469 |
| C | -0.432317 | 1.359717  | 0.420224  |
| C | 0.319624  | 0.132225  | -0.140802 |
| C | -0.401712 | -1.105369 | 0.270961  |
| O | -1.766280 | 2.870539  | -0.887312 |
| C | -0.619372 | 3.520594  | -0.649614 |
| C | 0.251641  | 2.677131  | 0.201112  |
| O | -0.408642 | 4.622752  | -1.083623 |
| C | 1.395674  | 3.143448  | 0.683656  |
| C | -3.048547 | 1.456136  | 0.586271  |
| C | -1.087935 | -2.003444 | -1.976704 |
| O | -4.243957 | -2.879524 | -0.921102 |
| O | 1.633658  | 0.143810  | 0.459460  |
| C | 2.670285  | -0.233950 | -0.304715 |
| O | 2.560721  | -0.585224 | -1.452448 |
| C | 3.968940  | -0.111205 | 0.443370  |
| C | 5.058429  | -1.067478 | -0.033909 |
| C | 6.402096  | -0.670234 | 0.563871  |
| C | 4.712253  | -2.512620 | 0.302659  |
| H | -3.997055 | -2.717263 | 1.118741  |
| H | -3.676081 | -0.542513 | -0.946162 |
| H | -3.351958 | -1.313759 | 2.719911  |
| H | -3.803946 | 0.357848  | 3.069919  |
| H | -2.041574 | -3.894930 | -0.223249 |
| H | -1.746012 | -2.993971 | 1.262269  |
| H | -2.120592 | -0.047321 | 2.808983  |
| H | -0.583304 | 1.190542  | 1.488742  |
| H | 0.433689  | 0.220374  | -1.219266 |
| H | -0.486807 | -1.206080 | 1.350675  |
| H | 2.022635  | 2.563214  | 1.346896  |
| H | 1.718787  | 4.143608  | 0.417245  |
| H | -2.939119 | 2.113471  | 1.452600  |
| H | -1.895062 | 0.857652  | -1.117686 |
| H | -3.885790 | 1.837075  | -0.003926 |
| H | -0.382084 | -1.304960 | -2.423295 |
| H | -2.087599 | -1.793362 | -2.368071 |
| H | -0.830120 | -3.008501 | -2.324702 |
| H | -4.249217 | -3.839801 | -0.862493 |

|   |          |           |           |
|---|----------|-----------|-----------|
| H | 4.294822 | 0.925869  | 0.301230  |
| H | 3.778188 | -0.231906 | 1.512310  |
| H | 5.123465 | -0.974788 | -1.121966 |
| H | 7.195414 | -1.337569 | 0.219383  |
| H | 6.678420 | 0.349411  | 0.283294  |
| H | 6.379950 | -0.720104 | 1.656921  |
| H | 5.473389 | -3.196078 | -0.081047 |
| H | 3.754551 | -2.809512 | -0.130365 |
| H | 4.652650 | -2.657744 | 1.385765  |

mPW1PW91 energy = -1155.17124314 a.u.

(2S,6R,7S,8S)-1, Conf. H

|   |           |           |           |
|---|-----------|-----------|-----------|
| C | -4.011440 | -1.815780 | 0.139712  |
| C | -3.751200 | -0.348998 | 0.018480  |
| C | -3.338508 | 0.498602  | 0.958263  |
| C | -3.274208 | 0.183336  | 2.418592  |
| C | -1.518676 | -1.932882 | -0.435769 |
| C | -2.675215 | -2.627167 | 0.228255  |
| C | -1.509282 | 1.674178  | -0.300080 |
| C | -0.232650 | 1.220540  | 0.454555  |
| C | 0.262474  | -0.149146 | -0.059347 |
| C | -0.712169 | -1.203904 | 0.338874  |
| O | -1.195540 | 2.947920  | -0.911140 |
| C | 0.056705  | 3.349853  | -0.656321 |
| C | 0.716168  | 2.360758  | 0.227382  |
| O | 0.500867  | 4.375570  | -1.101447 |
| C | 1.926686  | 2.584877  | 0.720798  |
| C | -2.783327 | 1.840263  | 0.525527  |
| C | -1.461721 | -1.992856 | -1.927892 |
| O | -4.775801 | -2.179281 | -1.004928 |
| O | 1.529301  | -0.406350 | 0.587469  |
| C | 2.473382  | -1.034844 | -0.129928 |
| O | 2.347423  | -1.321307 | -1.294219 |
| C | 3.673179  | -1.371392 | 0.711010  |
| C | 4.997506  | -1.301243 | -0.046563 |
| C | 5.344989  | 0.134635  | -0.421010 |
| C | 6.109166  | -1.940430 | 0.775459  |
| H | -4.586314 | -2.044095 | 1.043579  |
| H | -3.757182 | -0.004788 | -1.013476 |
| H | -2.241821 | 0.202957  | 2.782680  |
| H | -3.700883 | -0.789776 | 2.661093  |
| H | -2.859321 | -3.616791 | -0.202009 |
| H | -2.446735 | -2.769399 | 1.286325  |
| H | -3.815692 | 0.941565  | 2.993323  |
| H | -0.446188 | 1.117919  | 1.520767  |
| H | 0.428441  | -0.107120 | -1.133716 |
| H | -0.858946 | -1.262476 | 1.415198  |
| H | 2.408299  | 1.899274  | 1.404420  |
| H | 2.457860  | 3.487932  | 0.441507  |
| H | -2.576950 | 2.477593  | 1.389096  |
| H | -1.715413 | 0.997228  | -1.129563 |
| H | -3.505859 | 2.370224  | -0.100090 |
| H | -1.411186 | -3.036460 | -2.253109 |
| H | -0.601886 | -1.471619 | -2.345772 |
| H | -2.372942 | -1.581038 | -2.371543 |
| H | -4.981981 | -3.116938 | -0.942874 |

|   |          |           |           |
|---|----------|-----------|-----------|
| H | 3.688948 | -0.734071 | 1.597612  |
| H | 3.501357 | -2.394585 | 1.065463  |
| H | 4.875730 | -1.876235 | -0.969150 |
| H | 6.271947 | 0.175022  | -0.997711 |
| H | 4.561806 | 0.597541  | -1.025924 |
| H | 5.485898 | 0.748843  | 0.473814  |
| H | 7.057755 | -1.916010 | 0.234102  |
| H | 5.884317 | -2.984583 | 1.007134  |
| H | 6.255777 | -1.412925 | 1.722982  |

mPW1PW91 energy = -1155.17118952 a.u.

(2S,6R,7S,8S)-1, Conf. I

|   |           |           |           |
|---|-----------|-----------|-----------|
| C | -3.275665 | -2.404634 | 0.269573  |
| C | -3.357051 | -0.910475 | 0.335617  |
| C | -2.954084 | -0.102951 | 1.315628  |
| C | -2.535936 | -0.563008 | 2.675494  |
| C | -1.023930 | -1.841833 | -0.807524 |
| C | -1.832778 | -2.879770 | -0.077062 |
| C | -1.713004 | 1.601404  | -0.058649 |
| C | -0.236870 | 1.378261  | 0.358777  |
| C | 0.412043  | 0.236899  | -0.453772 |
| C | -0.227523 | -1.056454 | -0.079550 |
| O | -1.813229 | 2.974979  | -0.502067 |
| C | -0.649803 | 3.633382  | -0.414591 |
| C | 0.379110  | 2.731627  | 0.152832  |
| O | -0.540650 | 4.782698  | -0.752975 |
| C | 1.592836  | 3.180416  | 0.443872  |
| C | -2.780563 | 1.370963  | 1.009703  |
| C | -1.292372 | -1.683875 | -2.268822 |
| O | -4.140872 | -2.913619 | -0.743175 |
| O | 1.806300  | 0.215438  | -0.076120 |
| C | 2.680655  | -0.257173 | -0.977890 |
| O | 2.365435  | -0.608491 | -2.087670 |
| C | 4.081863  | -0.267040 | -0.435174 |
| C | 4.268387  | -1.127685 | 0.821379  |
| C | 3.936255  | -2.589583 | 0.550493  |
| C | 5.690520  | -0.976090 | 1.345396  |
| H | -3.543405 | -2.860305 | 1.228350  |
| H | -3.622893 | -0.458417 | -0.618281 |
| H | -2.705045 | -1.628092 | 2.832197  |
| H | -3.085268 | -0.015504 | 3.448068  |
| H | -1.930583 | -3.803596 | -0.652758 |
| H | -1.331998 | -3.124644 | 0.861058  |
| H | -1.474504 | -0.359581 | 2.852398  |
| H | -0.185312 | 1.101672  | 1.414245  |
| H | 0.346844  | 0.450781  | -1.519339 |
| H | -0.119315 | -1.290934 | 0.977338  |
| H | 2.346518  | 2.553899  | 0.900649  |
| H | 1.846146  | 4.212110  | 0.226758  |
| H | -2.517759 | 1.930931  | 1.910674  |
| H | -1.951442 | 0.994939  | -0.932421 |
| H | -3.712648 | 1.795752  | 0.628560  |
| H | -1.103478 | -2.630518 | -2.783810 |
| H | -0.676705 | -0.918269 | -2.738252 |
| H | -2.345327 | -1.447432 | -2.448437 |
| H | -5.033944 | -2.606849 | -0.554534 |

|   |          |           |           |
|---|----------|-----------|-----------|
| H | 4.734348 | -0.617752 | -1.235892 |
| H | 4.354877 | 0.768506  | -0.210914 |
| H | 3.580774 | -0.754205 | 1.586471  |
| H | 4.062097 | -3.188381 | 1.455550  |
| H | 2.906692 | -2.720221 | 0.208216  |
| H | 4.595377 | -3.005036 | -0.217438 |
| H | 5.834615 | -1.565068 | 2.254181  |
| H | 5.922100 | 0.065565  | 1.581116  |
| H | 6.420820 | -1.321675 | 0.607911  |

mPW1PW91 energy = -1155.17118681 a.u.

(2S,6R,7S,8S)-1, Conf. J

|   |           |           |           |
|---|-----------|-----------|-----------|
| C | -2.908977 | -2.736642 | -0.035345 |
| C | -3.251049 | -1.299779 | -0.271912 |
| C | -3.335436 | -0.322554 | 0.632474  |
| C | -3.378152 | -0.525098 | 2.115298  |
| C | -0.517394 | -1.969407 | -0.164395 |
| C | -1.495016 | -3.021910 | -0.613907 |
| C | -2.020667 | 1.450106  | -0.586087 |
| C | -0.695128 | 1.238566  | 0.187685  |
| C | 0.312829  | 0.404925  | -0.636385 |
| C | -0.269752 | -0.938236 | -0.975286 |
| O | -2.054011 | 2.848147  | -0.958991 |
| C | -1.087377 | 3.557923  | -0.356456 |
| C | -0.243819 | 2.643311  | 0.449086  |
| O | -0.987506 | 4.748249  | -0.496890 |
| C | 0.703611  | 3.103658  | 1.254672  |
| C | -3.299956 | 1.124299  | 0.183107  |
| C | -0.022911 | -2.111536 | 1.241445  |
| O | -3.856807 | -3.645353 | -0.584358 |
| O | 1.520124  | 0.337838  | 0.141893  |
| C | 2.659988  | 0.113815  | -0.532350 |
| O | 2.701508  | -0.047716 | -1.725645 |
| C | 3.851822  | 0.145969  | 0.382544  |
| C | 5.027908  | -0.701603 | -0.095255 |
| C | 6.268104  | -0.389181 | 0.731490  |
| C | 4.696612  | -2.188111 | -0.045412 |
| H | -2.905355 | -2.957775 | 1.031040  |
| H | -3.259734 | -1.018074 | -1.325004 |
| H | -2.505113 | -0.081335 | 2.604818  |
| H | -3.443675 | -1.571611 | 2.408317  |
| H | -1.575309 | -3.017235 | -1.705014 |
| H | -1.195788 | -4.026676 | -0.303601 |
| H | -4.251722 | -0.009396 | 2.527017  |
| H | -0.881320 | 0.701314  | 1.117493  |
| H | 0.545015  | 0.935270  | -1.561225 |
| H | -0.676031 | -0.989488 | -1.980411 |
| H | 1.304717  | 2.448106  | 1.871105  |
| H | 0.890587  | 4.170215  | 1.309445  |
| H | -3.365273 | 1.787742  | 1.049169  |
| H | -2.016479 | 0.904288  | -1.527325 |
| H | -4.150059 | 1.362218  | -0.461714 |
| H | 0.526348  | -1.243458 | 1.595957  |
| H | 0.642783  | -2.978855 | 1.309595  |
| H | -0.849463 | -2.310231 | 1.928561  |
| H | -3.925362 | -3.476217 | -1.530316 |

|   |          |           |           |
|---|----------|-----------|-----------|
| H | 4.148564 | 1.199775  | 0.441682  |
| H | 3.539800 | -0.143511 | 1.388658  |
| H | 5.227861 | -0.429275 | -1.135727 |
| H | 7.123409 | -0.976054 | 0.388944  |
| H | 6.539368 | 0.667355  | 0.663254  |
| H | 6.108302 | -0.624386 | 1.788186  |
| H | 5.529465 | -2.785544 | -0.423433 |
| H | 3.818744 | -2.427808 | -0.649326 |
| H | 4.497838 | -2.509745 | 0.981716  |

mPW1PW91 energy = -1155.17095101 a.u.

(2S,6R,7S,8S)-1, Conf. K

|   |           |           |           |
|---|-----------|-----------|-----------|
| C | -3.514453 | -2.234900 | -0.102765 |
| C | -3.536347 | -0.753575 | -0.308156 |
| C | -3.411823 | 0.201386  | 0.615411  |
| C | -3.502532 | -0.014927 | 2.094355  |
| C | -1.009996 | -1.996415 | -0.171809 |
| C | -2.181505 | -2.803543 | -0.663530 |
| C | -1.727014 | 1.653062  | -0.563158 |
| C | -0.485209 | 1.173498  | 0.227815  |
| C | 0.334155  | 0.145312  | -0.584997 |
| C | -0.520630 | -1.034316 | -0.957238 |
| O | -1.457683 | 3.021256  | -0.948720 |
| C | -0.370213 | 3.517210  | -0.338366 |
| C | 0.245454  | 2.455116  | 0.492502  |
| O | -0.017113 | 4.656765  | -0.490507 |
| C | 1.244860  | 2.715490  | 1.324188  |
| C | -3.055608 | 1.611885  | 0.189683  |
| C | -0.599884 | -2.263715 | 1.242533  |
| O | -4.620974 | -2.906272 | -0.694380 |
| O | 1.479451  | -0.191922 | 0.216263  |
| C | 2.533647  | -0.709628 | -0.437033 |
| O | 2.565947  | -0.847537 | -1.633466 |
| C | 3.618344  | -1.123936 | 0.516502  |
| C | 5.014301  | -1.152891 | -0.098456 |
| C | 5.493689  | 0.248883  | -0.454696 |
| C | 5.989744  | -1.840164 | 0.848421  |
| H | -3.583749 | -2.476655 | 0.956898  |
| H | -3.478347 | -0.456061 | -1.355632 |
| H | -2.554123 | 0.213521  | 2.591107  |
| H | -3.798497 | -1.026645 | 2.366608  |
| H | -2.234892 | -2.760478 | -1.755289 |
| H | -2.111661 | -3.854954 | -0.372412 |
| H | -4.241022 | 0.673154  | 2.518667  |
| H | -0.787293 | 0.693752  | 1.158224  |
| H | 0.698163  | 0.620085  | -1.497329 |
| H | -0.903503 | -0.982094 | -1.971649 |
| H | 1.676361  | 1.955358  | 1.962180  |
| H | 1.649398  | 3.719794  | 1.382269  |
| H | -2.985567 | 2.264673  | 1.063475  |
| H | -1.826574 | 1.107375  | -1.499009 |
| H | -3.823575 | 2.036764  | -0.462020 |
| H | -0.173986 | -3.270193 | 1.317051  |
| H | -1.467583 | -2.252537 | 1.907744  |
| H | 0.138237  | -1.560465 | 1.619095  |
| H | -4.629034 | -2.704300 | -1.636308 |

|   |          |           |           |
|---|----------|-----------|-----------|
| H | 3.587579 | -0.478586 | 1.397613  |
| H | 3.338043 | -2.126687 | 0.860932  |
| H | 4.956142 | -1.740084 | -1.019659 |
| H | 6.476462 | 0.214207  | -0.930345 |
| H | 4.810289 | 0.746437  | -1.145883 |
| H | 5.581482 | 0.871159  | 0.441399  |
| H | 6.989954 | -1.885946 | 0.411527  |
| H | 5.677344 | -2.862965 | 1.073782  |
| H | 6.069055 | -1.298946 | 1.796203  |

mPW1PW91 energy = -1155.17094239 a.u.

(2S,6R,7S,8S)-1, Conf. L

|   |           |           |           |
|---|-----------|-----------|-----------|
| C | -2.745405 | -2.759022 | -0.070465 |
| C | -3.130442 | -1.320190 | -0.197848 |
| C | -3.160289 | -0.395298 | 0.764696  |
| C | -3.078746 | -0.672284 | 2.234238  |
| C | -0.395427 | -1.927485 | -0.333025 |
| C | -1.377713 | -2.985510 | -0.758118 |
| C | -1.974292 | 1.452310  | -0.465086 |
| C | -0.586933 | 1.236669  | 0.190210  |
| C | 0.361757  | 0.476144  | -0.764242 |
| C | -0.217034 | -0.864834 | -1.121317 |
| O | -2.057822 | 2.861973  | -0.780371 |
| C | -1.059611 | 3.566499  | -0.225079 |
| C | -0.147169 | 2.638049  | 0.483996  |
| O | -0.987520 | 4.762527  | -0.328692 |
| C | 0.838019  | 3.084508  | 1.251101  |
| C | -3.182988 | 1.072827  | 0.388679  |
| C | 0.191708  | -2.102693 | 1.032388  |
| O | -3.659856 | -3.636403 | -0.724153 |
| O | 1.644547  | 0.402177  | -0.116594 |
| C | 2.725174  | 0.395488  | -0.916526 |
| O | 2.658125  | 0.444078  | -2.119471 |
| C | 4.000643  | 0.330916  | -0.126645 |
| C | 4.200559  | -0.989223 | 0.631945  |
| C | 4.220015  | -2.183164 | -0.314252 |
| C | 5.480143  | -0.918610 | 1.455366  |
| H | -2.662804 | -3.043416 | 0.981800  |
| H | -3.233101 | -0.989034 | -1.229993 |
| H | -3.092861 | -1.733286 | 2.478752  |
| H | -2.179830 | -0.229417 | 2.675061  |
| H | -1.544732 | -2.939715 | -1.836397 |
| H | -1.032222 | -3.993513 | -0.513332 |
| H | -3.927015 | -0.201182 | 2.741778  |
| H | -0.684151 | 0.648689  | 1.102172  |
| H | 0.489242  | 1.059365  | -1.676702 |
| H | -0.686158 | -0.888561 | -2.099620 |
| H | 1.484798  | 2.416736  | 1.805144  |
| H | 1.008568  | 4.151434  | 1.341480  |
| H | -3.187525 | 1.692500  | 1.288936  |
| H | -2.036496 | 0.940446  | -1.422965 |
| H | -4.084680 | 1.326153  | -0.175186 |
| H | 0.875837  | -2.958080 | 1.030130  |
| H | -0.585077 | -2.338742 | 1.764552  |
| H | 0.746543  | -1.234051 | 1.377085  |
| H | -4.525339 | -3.513601 | -0.321138 |



|   |          |           |           |
|---|----------|-----------|-----------|
| H | 4.820416 | 0.486468  | -0.829067 |
| H | 4.000115 | 1.161344  | 0.584298  |
| H | 3.358560 | -1.108870 | 1.320586  |
| H | 4.353960 | -3.114434 | 0.241067  |
| H | 3.291931 | -2.269631 | -0.884258 |
| H | 5.042124 | -2.102136 | -1.031454 |
| H | 5.629796 | -1.841335 | 2.020857  |
| H | 5.454573 | -0.090784 | 2.168394  |
| H | 6.353909 | -0.778754 | 0.812176  |

mPW1PW91 energy = -1155.17080258 a.u.

(2S,6R,7S,8S)-1, Conf. M

|   |           |           |           |
|---|-----------|-----------|-----------|
| C | -2.919994 | -2.728558 | -0.040915 |
| C | -3.262308 | -1.295484 | -0.273267 |
| C | -3.332193 | -0.321735 | 0.635740  |
| C | -3.365850 | -0.525062 | 2.118874  |
| C | -0.522259 | -1.966550 | -0.165618 |
| C | -1.504327 | -3.012257 | -0.620113 |
| C | -2.020215 | 1.452618  | -0.583968 |
| C | -0.692618 | 1.241948  | 0.186756  |
| C | 0.313033  | 0.406213  | -0.637449 |
| C | -0.274366 | -0.934820 | -0.975613 |
| O | -2.055519 | 2.851217  | -0.955557 |
| C | -1.087019 | 3.560929  | -0.356864 |
| C | -0.240023 | 2.646594  | 0.445531  |
| O | -0.987631 | 4.751433  | -0.497171 |
| C | 0.710927  | 3.107433  | 1.246698  |
| C | -3.297089 | 1.125705  | 0.188311  |
| C | -0.024175 | -2.113956 | 1.238431  |
| O | -3.888474 | -3.546931 | -0.689272 |
| O | 1.519995  | 0.335852  | 0.141412  |
| C | 2.659931  | 0.110760  | -0.532282 |
| O | 2.702065  | -0.051228 | -1.725472 |
| C | 3.851403  | 0.142519  | 0.383195  |
| C | 5.027915  | -0.704426 | -0.094523 |
| C | 6.267762  | -0.391961 | 0.732714  |
| C | 4.697152  | -2.191080 | -0.045495 |
| H | -2.915679 | -2.951344 | 1.029222  |
| H | -3.286933 | -1.018037 | -1.325526 |
| H | -2.486019 | -0.089427 | 2.603495  |
| H | -3.437937 | -1.571392 | 2.411208  |
| H | -1.592678 | -3.003959 | -1.708747 |
| H | -1.199537 | -4.018425 | -0.312443 |
| H | -4.232245 | -0.002252 | 2.536768  |
| H | -0.876475 | 0.705672  | 1.117585  |
| H | 0.546916  | 0.935430  | -1.562441 |
| H | -0.685574 | -0.983692 | -1.978734 |
| H | 1.314742  | 2.452332  | 1.860962  |
| H | 0.898132  | 4.174035  | 1.299828  |
| H | -3.360473 | 1.788356  | 1.055158  |
| H | -2.018849 | 0.907204  | -1.525449 |
| H | -4.148636 | 1.363344  | -0.454610 |
| H | 0.639234  | -2.983420 | 1.303237  |
| H | -0.849821 | -2.310780 | 1.927253  |
| H | 0.528862  | -1.248424 | 1.593367  |
| H | -3.607575 | -4.464903 | -0.612272 |

|   |          |           |           |
|---|----------|-----------|-----------|
| H | 4.147830 | 1.196379  | 0.443073  |
| H | 3.539026 | -0.147512 | 1.389062  |
| H | 5.228103 | -0.431637 | -1.134814 |
| H | 7.123412 | -0.978364 | 0.390208  |
| H | 6.538683 | 0.664691  | 0.664959  |
| H | 6.107735 | -0.627566 | 1.789301  |
| H | 5.530228 | -2.788026 | -0.423818 |
| H | 3.819439 | -2.430673 | -0.649687 |
| H | 4.498481 | -2.513338 | 0.981486  |

mPW1PW91 energy = -1155.17074217 a.u.

(2S,6R,7S,8S)-1, Conf. N

|   |           |           |           |
|---|-----------|-----------|-----------|
| C | -3.292559 | -2.403016 | 0.259732  |
| C | -3.378604 | -0.913615 | 0.349573  |
| C | -2.939229 | -0.120910 | 1.324525  |
| C | -2.480639 | -0.597469 | 2.665615  |
| C | -1.024252 | -1.836792 | -0.789328 |
| C | -1.830594 | -2.868477 | -0.050213 |
| C | -1.717523 | 1.600177  | -0.043012 |
| C | -0.235837 | 1.386290  | 0.360436  |
| C | 0.411443  | 0.244325  | -0.452154 |
| C | -0.221905 | -1.049575 | -0.069691 |
| O | -1.831250 | 2.975402  | -0.478953 |
| C | -0.670039 | 3.638914  | -0.408565 |
| C | 0.371694  | 2.741741  | 0.142798  |
| O | -0.570783 | 4.789108  | -0.747385 |
| C | 1.588043  | 3.196131  | 0.413438  |
| C | -2.776063 | 1.356453  | 1.031413  |
| C | -1.305590 | -1.680539 | -2.248539 |
| O | -4.199949 | -2.794491 | -0.764935 |
| O | 1.807853  | 0.227856  | -0.081606 |
| C | 2.677719  | -0.254751 | -0.982194 |
| O | 2.357515  | -0.616632 | -2.087210 |
| C | 4.080626  | -0.262650 | -0.443917 |
| C | 4.270200  | -1.123651 | 0.812141  |
| C | 3.935549  | -2.585225 | 0.542598  |
| C | 5.694114  | -0.973671 | 1.331702  |
| H | -3.587535 | -2.876857 | 1.202089  |
| H | -3.690113 | -0.452262 | -0.585088 |
| H | -1.417960 | -0.384526 | 2.821644  |
| H | -2.636074 | -1.666593 | 2.809588  |
| H | -1.893723 | -3.809479 | -0.605998 |
| H | -1.345170 | -3.086071 | 0.903383  |
| H | -3.018742 | -0.068916 | 3.459124  |
| H | -0.172334 | 1.115430  | 1.416753  |
| H | 0.339918  | 0.454818  | -1.517974 |
| H | -0.103870 | -1.281444 | 0.986548  |
| H | 2.352001  | 2.573670  | 0.858521  |
| H | 1.832858  | 4.228776  | 0.191131  |
| H | -2.510055 | 1.910854  | 1.934941  |
| H | -1.959234 | 0.995923  | -0.917541 |
| H | -3.712823 | 1.778433  | 0.658999  |
| H | -0.690815 | -0.918224 | -2.724290 |
| H | -2.359125 | -1.439516 | -2.418310 |
| H | -1.124143 | -2.628241 | -2.764678 |
| H | -4.169457 | -3.752980 | -0.842442 |

|   |          |           |           |
|---|----------|-----------|-----------|
| H | 4.731372 | -0.613192 | -1.246122 |
| H | 4.353576 | 0.772813  | -0.219590 |
| H | 3.585397 | -0.749251 | 1.579314  |
| H | 4.064195 | -3.184024 | 1.447272  |
| H | 2.904516 | -2.714683 | 0.204282  |
| H | 4.591321 | -3.001447 | -0.227780 |
| H | 5.840216 | -1.562440 | 2.240307  |
| H | 5.927639 | 0.067767  | 1.566353  |
| H | 6.421745 | -1.320417 | 0.592129  |

mPW1PW91 energy = -1155.17072828 a.u.

(2S,6R,7S,8S)-1, Conf. O

|   |           |           |           |
|---|-----------|-----------|-----------|
| C | -3.520162 | -2.226826 | -0.105908 |
| C | -3.548050 | -0.749532 | -0.307519 |
| C | -3.405288 | 0.198318  | 0.620431  |
| C | -3.476405 | -0.023227 | 2.099890  |
| C | -1.011209 | -1.992385 | -0.177506 |
| C | -2.186488 | -2.790739 | -0.673678 |
| C | -1.727957 | 1.657610  | -0.559369 |
| C | -0.482152 | 1.179929  | 0.226742  |
| C | 0.333953  | 0.150175  | -0.586850 |
| C | -0.525510 | -1.025639 | -0.959329 |
| O | -1.464026 | 3.027939  | -0.941828 |
| C | -0.374522 | 3.524768  | -0.336791 |
| C | 0.249326  | 2.461968  | 0.487269  |
| O | -0.024954 | 4.665723  | -0.487424 |
| C | 1.255938  | 2.722315  | 1.310225  |
| C | -3.054375 | 1.610539  | 0.196545  |
| C | -0.593217 | -2.271931 | 1.232170  |
| O | -4.626983 | -2.807226 | -0.788843 |
| O | 1.478046  | -0.191213 | 0.214630  |
| C | 2.531195  | -0.711501 | -0.438215 |
| O | 2.564019  | -0.849579 | -1.634564 |
| C | 3.614495  | -1.128677 | 0.515815  |
| C | 5.011020  | -1.157702 | -0.097910 |
| C | 5.491666  | 0.244288  | -0.451551 |
| C | 5.985203  | -1.847095 | 0.848738  |
| H | -3.583034 | -2.470438 | 0.957878  |
| H | -3.514576 | -0.453324 | -1.354730 |
| H | -2.519854 | 0.195708  | 2.585208  |
| H | -3.776235 | -1.033888 | 2.372015  |
| H | -2.250512 | -2.738035 | -1.762725 |
| H | -2.109756 | -3.845732 | -0.389488 |
| H | -4.203606 | 0.668959  | 2.536773  |
| H | -0.780122 | 0.701437  | 1.159200  |
| H | 0.699584  | 0.623919  | -1.499027 |
| H | -0.916608 | -0.965766 | -1.970024 |
| H | 1.694394  | 1.961726  | 1.942871  |
| H | 1.659607  | 3.727097  | 1.366056  |
| H | -2.984995 | 2.262635  | 1.070931  |
| H | -1.829640 | 1.113950  | -1.496032 |
| H | -3.825033 | 2.032461  | -0.453787 |
| H | -0.168165 | -3.279552 | 1.296834  |
| H | -1.457031 | -2.263960 | 1.902460  |
| H | 0.148082  | -1.572731 | 1.610002  |
| H | -4.551001 | -3.765083 | -0.724259 |

|   |          |           |           |
|---|----------|-----------|-----------|
| H | 3.583591 | -0.485000 | 1.398132  |
| H | 3.333088 | -2.131919 | 0.857908  |
| H | 4.953230 | -1.743397 | -1.020079 |
| H | 6.474804 | 0.209647  | -0.926428 |
| H | 4.809204 | 0.743396  | -1.142537 |
| H | 5.579144 | 0.865110  | 0.445584  |
| H | 6.985689 | -1.893101 | 0.412502  |
| H | 5.671845 | -2.869970 | 1.072493  |
| H | 6.064316 | -1.307229 | 1.797306  |

mPW1PW91 energy = -1155.17072085 a.u.

(2S,6R,7S,8S)-1, Conf. P

|   |           |           |           |
|---|-----------|-----------|-----------|
| C | -2.769492 | -2.703094 | 0.326456  |
| C | -3.254947 | -1.294720 | 0.200983  |
| C | -3.136684 | -0.327335 | 1.113774  |
| C | -2.811649 | -0.548532 | 2.558317  |
| C | -0.800485 | -1.837938 | -1.107556 |
| C | -1.722038 | -2.989988 | -0.769918 |
| C | -2.010621 | 1.427713  | -0.256953 |
| C | -0.597744 | 1.361094  | 0.378597  |
| C | 0.294823  | 0.299261  | -0.302510 |
| C | -0.314492 | -1.052480 | -0.145147 |
| O | -2.172658 | 2.771211  | -0.766272 |
| C | -1.110034 | 3.549076  | -0.517341 |
| C | -0.099782 | 2.769548  | 0.235664  |
| O | -1.062432 | 4.696957  | -0.873957 |
| C | 1.002768  | 3.343446  | 0.698804  |
| C | -3.197156 | 1.113532  | 0.656135  |
| C | -0.588047 | -1.612239 | -2.571553 |
| O | -3.793889 | -3.680768 | 0.135883  |
| O | 1.567075  | 0.357741  | 0.382543  |
| C | 2.658870  | 0.036109  | -0.328286 |
| O | 2.626874  | -0.268154 | -1.494288 |
| C | 3.910780  | 0.146704  | 0.497551  |
| C | 4.972901  | -0.893023 | 0.143321  |
| C | 6.286523  | -0.557657 | 0.838061  |
| C | 4.507525  | -2.300516 | 0.496779  |
| H | -2.313312 | -2.853068 | 1.308369  |
| H | -3.547054 | -1.009491 | -0.809114 |
| H | -1.858054 | -0.091678 | 2.840538  |
| H | -2.780262 | -1.601096 | 2.835726  |
| H | -2.283394 | -3.252253 | -1.670774 |
| H | -1.155214 | -3.885216 | -0.496089 |
| H | -3.572823 | -0.064404 | 3.178859  |
| H | -0.669406 | 1.097289  | 1.434587  |
| H | 0.453982  | 0.563679  | -1.346028 |
| H | -0.505478 | -1.320491 | 0.890382  |
| H | 1.732645  | 2.802820  | 1.285965  |
| H | 1.186417  | 4.392001  | 0.492782  |
| H | -3.193098 | 1.799220  | 1.506928  |
| H | -2.059867 | 0.774727  | -1.128025 |
| H | -4.109076 | 1.308743  | 0.085987  |
| H | -0.272824 | -2.547092 | -3.045205 |
| H | 0.169721  | -0.861170 | -2.786344 |
| H | -1.522667 | -1.320925 | -3.062798 |
| H | -4.486931 | -3.506792 | 0.780712  |

|   |          |           |           |
|---|----------|-----------|-----------|
| H | 4.302530 | 1.153712  | 0.313701  |
| H | 3.651354 | 0.097098  | 1.557176  |
| H | 5.130756 | -0.845114 | -0.938139 |
| H | 7.061625 | -1.282017 | 0.577542  |
| H | 6.648427 | 0.433744  | 0.554132  |
| H | 6.173572 | -0.572493 | 1.926408  |
| H | 5.258985 | -3.041720 | 0.215100  |
| H | 3.579796 | -2.561167 | -0.017722 |
| H | 4.333780 | -2.396509 | 1.572989  |

mPW1PW91 energy = -1155.17071723 a.u.

(2S,6R,7S,8S)-1, Conf. Q

|   |           |           |           |
|---|-----------|-----------|-----------|
| C | -3.510123 | -2.107799 | 0.344700  |
| C | -3.605889 | -0.628169 | 0.151825  |
| C | -3.271075 | 0.315205  | 1.035284  |
| C | -3.071321 | 0.084732  | 2.500495  |
| C | -1.322882 | -1.851814 | -1.012276 |
| C | -2.531395 | -2.703443 | -0.689001 |
| C | -1.667951 | 1.652020  | -0.331787 |
| C | -0.352480 | 1.247734  | 0.382472  |
| C | 0.257947  | -0.038585 | -0.218566 |
| C | -0.692087 | -1.175470 | -0.050912 |
| O | -1.447649 | 2.966551  | -0.891754 |
| C | -0.230777 | 3.451625  | -0.607354 |
| C | 0.503141  | 2.470366  | 0.226018  |
| O | 0.132901  | 4.530142  | -0.996641 |
| C | 1.695195  | 2.756415  | 0.732160  |
| C | -2.933101 | 1.699868  | 0.527453  |
| C | -0.990347 | -1.760707 | -2.468190 |
| O | -4.745001 | -2.793206 | 0.129447  |
| O | 1.469916  | -0.289931 | 0.528640  |
| C | 2.474218  | -0.897408 | -0.123283 |
| O | 2.442717  | -1.156875 | -1.299953 |
| C | 3.601277  | -1.245966 | 0.807983  |
| C | 4.974428  | -1.279202 | 0.142458  |
| C | 5.417671  | 0.115630  | -0.281689 |
| C | 5.993927  | -1.919562 | 1.075819  |
| H | -3.150149 | -2.330662 | 1.352581  |
| H | -3.778995 | -0.321456 | -0.879120 |
| H | -3.318861 | -0.928251 | 2.814875  |
| H | -3.710034 | 0.772180  | 3.064732  |
| H | -3.104484 | -2.843846 | -1.609541 |
| H | -2.236306 | -3.705348 | -0.362324 |
| H | -2.045726 | 0.301107  | 2.815394  |
| H | -0.539885 | 1.055208  | 1.439807  |
| H | 0.525188  | 0.129139  | -1.259858 |
| H | -0.994295 | -1.334241 | 0.980258  |
| H | 2.229486  | 2.070304  | 1.375266  |
| H | 2.156862  | 3.710545  | 0.504339  |
| H | -2.782734 | 2.397834  | 1.354892  |
| H | -1.848500 | 0.995621  | -1.182634 |
| H | -3.737583 | 2.099552  | -0.094975 |
| H | -1.794246 | -1.265892 | -3.023548 |
| H | -0.905403 | -2.767869 | -2.888077 |
| H | -0.055043 | -1.240085 | -2.664475 |
| H | -5.389810 | -2.438107 | 0.749578  |

|   |          |           |           |
|---|----------|-----------|-----------|
| H | 3.590805 | -0.562716 | 1.660172  |
| H | 3.352912 | -2.237282 | 1.205740  |
| H | 4.890828 | -1.899383 | -0.754827 |
| H | 6.382987 | 0.079413  | -0.791763 |
| H | 4.701605 | 0.577031  | -0.965397 |
| H | 5.526658 | 0.772133  | 0.587236  |
| H | 6.979136 | -1.963380 | 0.605966  |
| H | 5.706338 | -2.939669 | 1.342609  |
| H | 6.095924 | -1.348138 | 2.003525  |

mPW1PW91 energy = -1155.17066748 a.u.

(2S,6R,7S,8S)-1, Conf. R

|   |           |           |           |
|---|-----------|-----------|-----------|
| C | -3.806287 | -1.705737 | 0.058637  |
| C | -3.574878 | -0.242364 | -0.136856 |
| C | -3.200537 | 0.651657  | 0.781359  |
| C | -3.203600 | 0.422504  | 2.261390  |
| C | -1.327144 | -1.935595 | -0.244678 |
| C | -2.669498 | -2.500191 | -0.626575 |
| C | -1.382884 | 1.798725  | -0.530442 |
| C | -0.192267 | 1.066303  | 0.138638  |
| C | 0.342134  | -0.064947 | -0.769527 |
| C | -0.750293 | -1.055572 | -1.065930 |
| O | -0.892411 | 3.105869  | -0.910897 |
| C | 0.316965  | 3.366160  | -0.391298 |
| C | 0.784819  | 2.179688  | 0.363715  |
| O | 0.866947  | 4.423443  | -0.553280 |
| C | 1.872569  | 2.223832  | 1.120410  |
| C | -2.627148 | 1.982328  | 0.336968  |
| C | -0.828667 | -2.321467 | 1.112961  |
| O | -5.016759 | -2.159907 | -0.543210 |
| O | 1.481900  | -0.638920 | -0.105802 |
| C | 2.339796  | -1.318901 | -0.885571 |
| O | 2.206764  | -1.419133 | -2.079819 |
| C | 3.453593  | -1.937789 | -0.090404 |
| C | 4.348076  | -0.933260 | 0.647323  |
| C | 5.412020  | -1.680533 | 1.440970  |
| C | 4.982012  | 0.065230  | -0.313078 |
| H | -3.817281 | -1.953672 | 1.123371  |
| H | -3.560474 | 0.059544  | -1.182927 |
| H | -3.658314 | -0.522883 | 2.552809  |
| H | -3.758923 | 1.227287  | 2.754126  |
| H | -2.823032 | -2.422063 | -1.704976 |
| H | -2.769553 | -3.552732 | -0.347936 |
| H | -2.190004 | 0.458073  | 2.673258  |
| H | -0.502642 | 0.616530  | 1.081195  |
| H | 0.691158  | 0.368382  | -1.707909 |
| H | -1.217854 | -0.904817 | -2.033691 |
| H | 2.195926  | 1.376948  | 1.710970  |
| H | 2.462170  | 3.132609  | 1.164829  |
| H | -2.362334 | 2.588792  | 1.206980  |
| H | -1.661104 | 1.315589  | -1.464673 |
| H | -3.356028 | 2.557321  | -0.240285 |
| H | -0.553101 | -3.381869 | 1.112717  |
| H | -1.616755 | -2.214322 | 1.863401  |
| H | 0.040600  | -1.752542 | 1.432821  |
| H | -5.744374 | -1.668061 | -0.149181 |

|   |          |           |           |
|---|----------|-----------|-----------|
| H | 3.001309 | -2.622352 | 0.633257  |
| H | 4.048599 | -2.530277 | -0.786829 |
| H | 3.719653 | -0.382866 | 1.353806  |
| H | 6.041446 | -0.983855 | 1.999601  |
| H | 4.966954 | -2.376162 | 2.156661  |
| H | 6.063738 | -2.256178 | 0.777230  |
| H | 5.616411 | 0.772205  | 0.226505  |
| H | 4.233133 | 0.645743  | -0.857271 |
| H | 5.606459 | -0.445593 | -1.051867 |

mPW1PW91 energy = -1155.17063822 a.u.

(2S,6R,7S,8S)-1, Conf. S

|   |           |           |           |
|---|-----------|-----------|-----------|
| C | -3.838819 | -1.709650 | 0.009910  |
| C | -3.593821 | -0.255964 | -0.236681 |
| C | -3.275192 | 0.681642  | 0.658643  |
| C | -3.367936 | 0.525811  | 2.144874  |
| C | -1.347364 | -1.949890 | -0.154947 |
| C | -2.668953 | -2.533019 | -0.578599 |
| C | -1.385293 | 1.769484  | -0.596292 |
| C | -0.243333 | 1.056712  | 0.170053  |
| C | 0.344501  | -0.098943 | -0.671262 |
| C | -0.727476 | -1.107043 | -0.983500 |
| O | -0.859109 | 3.056780  | -0.997414 |
| C | 0.313208  | 3.332918  | -0.405043 |
| C | 0.717674  | 2.176186  | 0.428783  |
| O | 0.881341  | 4.379751  | -0.571709 |
| C | 1.738629  | 2.247246  | 1.271679  |
| C | -2.678353 | 1.992352  | 0.186383  |
| C | -0.916363 | -2.274320 | 1.241481  |
| O | -5.016193 | -2.188753 | -0.637155 |
| O | 1.458872  | -0.628713 | 0.067415  |
| C | 2.337631  | -1.365335 | -0.633428 |
| O | 2.214824  | -1.591556 | -1.811368 |
| C | 3.474572  | -1.839786 | 0.223508  |
| C | 4.549924  | -0.764834 | 0.458637  |
| C | 5.615391  | -1.313270 | 1.399368  |
| C | 5.169291  | -0.279988 | -0.845653 |
| H | -3.908753 | -1.912431 | 1.081921  |
| H | -3.517577 | -0.002393 | -1.292847 |
| H | -2.385032 | 0.613625  | 2.618624  |
| H | -3.816269 | -0.416192 | 2.455879  |
| H | -2.766648 | -2.504813 | -1.665961 |
| H | -2.784086 | -3.571901 | -0.257632 |
| H | -3.975209 | 1.337938  | 2.558183  |
| H | -0.615489 | 0.632307  | 1.101941  |
| H | 0.734517  | 0.303483  | -1.607747 |
| H | -1.141121 | -1.000477 | -1.981214 |
| H | 2.006901  | 1.421337  | 1.917505  |
| H | 2.326224  | 3.156285  | 1.333923  |
| H | -2.466084 | 2.640091  | 1.040705  |
| H | -1.612866 | 1.251222  | -1.525394 |
| H | -3.372116 | 2.536853  | -0.459623 |
| H | -0.653885 | -3.336036 | 1.304782  |
| H | -1.735287 | -2.122799 | 1.949992  |
| H | -0.054924 | -1.700241 | 1.573287  |
| H | -5.763000 | -1.682058 | -0.302320 |

|   |          |           |           |
|---|----------|-----------|-----------|
| H | 3.075440 | -2.166659 | 1.185927  |
| H | 3.920806 | -2.700729 | -0.276780 |
| H | 4.069125 | 0.088714  | 0.947259  |
| H | 6.374661 | -0.556675 | 1.610653  |
| H | 5.186028 | -1.631404 | 2.352663  |
| H | 6.121646 | -2.175851 | 0.956313  |
| H | 5.935898 | 0.473063  | -0.649076 |
| H | 4.429107 | 0.169022  | -1.511006 |
| H | 5.642606 | -1.105211 | -1.385569 |

mPW1PW91 energy = -1155.17050890 a.u.

(2S,6R,7S,8S)-1, Conf. T

|   |           |           |           |
|---|-----------|-----------|-----------|
| C | -4.089753 | -1.506901 | 0.261409  |
| C | -3.690308 | -0.077099 | 0.060684  |
| C | -3.218853 | 0.787376  | 0.958271  |
| C | -3.206138 | 0.557063  | 2.435514  |
| C | -1.648930 | -1.872593 | -0.409102 |
| C | -2.845617 | -2.444262 | 0.301725  |
| C | -1.293057 | 1.707166  | -0.366905 |
| C | -0.066718 | 1.148936  | 0.399376  |
| C | 0.303755  | -0.257612 | -0.120387 |
| C | -0.751261 | -1.212982 | 0.325562  |
| O | -0.848140 | 2.911657  | -1.033595 |
| C | 0.425956  | 3.217995  | -0.751780 |
| C | 0.970020  | 2.212110  | 0.189228  |
| O | 0.967745  | 4.184837  | -1.219677 |
| C | 2.157749  | 2.370694  | 0.757075  |
| C | -2.531939 | 2.043689  | 0.460785  |
| C | -1.639145 | -1.970118 | -1.899966 |
| O | -4.918734 | -1.954524 | -0.809352 |
| O | 1.575232  | -0.608370 | 0.468841  |
| C | 2.290683  | -1.546166 | -0.174313 |
| O | 1.938429  | -2.048239 | -1.212892 |
| C | 3.562715  | -1.877194 | 0.551044  |
| C | 4.646446  | -0.793018 | 0.437222  |
| C | 5.870291  | -1.216104 | 1.239191  |
| C | 5.014609  | -0.502275 | -1.012138 |
| H | -4.625816 | -1.640915 | 1.206284  |
| H | -3.635456 | 0.200853  | -0.990262 |
| H | -2.180704 | 0.509006  | 2.816779  |
| H | -3.718955 | -0.359023 | 2.727732  |
| H | -3.155026 | -3.403300 | -0.121123 |
| H | -2.591437 | -2.609238 | 1.350054  |
| H | -3.685449 | 1.394124  | 2.953436  |
| H | -0.296953 | 1.057497  | 1.462834  |
| H | 0.424160  | -0.236244 | -1.202266 |
| H | -0.872576 | -1.235415 | 1.406748  |
| H | 2.541133  | 1.673491  | 1.489845  |
| H | 2.769541  | 3.226712  | 0.494993  |
| H | -2.247573 | 2.690945  | 1.294168  |
| H | -1.580191 | 1.024115  | -1.166083 |
| H | -3.202387 | 2.622300  | -0.179880 |
| H | -1.696189 | -3.021148 | -2.198766 |
| H | -0.744584 | -1.543950 | -2.350776 |
| H | -2.519685 | -1.484574 | -2.331045 |
| H | -5.687948 | -1.376854 | -0.852587 |

|   |          |           |           |
|---|----------|-----------|-----------|
| H | 3.326088 | -2.040772 | 1.605157  |
| H | 3.935009 | -2.813681 | 0.132883  |
| H | 4.249434 | 0.125342  | 0.880604  |
| H | 6.640966 | -0.442292 | 1.210176  |
| H | 5.620357 | -1.400430 | 2.286952  |
| H | 6.306223 | -2.133845 | 0.833650  |
| H | 5.801187 | 0.254163  | -1.063118 |
| H | 4.163256 | -0.129651 | -1.586093 |
| H | 5.384283 | -1.402346 | -1.511861 |

mPW1PW91 energy = -1155.17023438 a.u.

(2S,6R,7S,8S)-1, Conf. U

|   |           |           |           |
|---|-----------|-----------|-----------|
| C | -3.142946 | -2.672167 | 0.171499  |
| C | -3.383502 | -1.192556 | 0.153064  |
| C | -3.146060 | -0.310133 | 1.122205  |
| C | -2.821423 | -0.673890 | 2.535791  |
| C | -0.828087 | -1.910119 | -0.653695 |
| C | -1.615655 | -2.997005 | 0.025249  |
| C | -1.924695 | 1.470364  | -0.170842 |
| C | -0.494583 | 1.419338  | 0.426673  |
| C | 0.349300  | 0.313644  | -0.241566 |
| C | -0.208017 | -1.019426 | 0.122465  |
| O | -2.107825 | 2.808750  | -0.688273 |
| C | -1.029801 | 3.584409  | -0.510962 |
| C | 0.010751  | 2.816450  | 0.211078  |
| O | -0.993113 | 4.723098  | -0.897271 |
| C | 1.140766  | 3.394412  | 0.596533  |
| C | -3.088417 | 1.162166  | 0.769581  |
| C | -0.926392 | -1.824626 | -2.144102 |
| O | -3.924976 | -3.337444 | -0.813047 |
| O | 1.685179  | 0.436668  | 0.295792  |
| C | 2.694227  | 0.012121  | -0.479996 |
| O | 2.538883  | -0.415519 | -1.596695 |
| C | 4.027795  | 0.164249  | 0.197148  |
| C | 4.921516  | -1.068213 | 0.038711  |
| C | 6.331416  | -0.763560 | 0.526954  |
| C | 4.335650  | -2.271679 | 0.767343  |
| H | -3.472917 | -3.113290 | 1.112591  |
| H | -3.616545 | -0.801351 | -0.837221 |
| H | -3.513688 | -0.175000 | 3.221701  |
| H | -1.817966 | -0.335143 | 2.812888  |
| H | -1.542241 | -3.950355 | -0.504296 |
| H | -1.215268 | -3.146415 | 1.029722  |
| H | -2.878316 | -1.745711 | 2.722880  |
| H | -0.544006 | 1.200008  | 1.495590  |
| H | 0.393709  | 0.476778  | -1.317012 |
| H | -0.206979 | -1.200527 | 1.194955  |
| H | 1.898137  | 2.867327  | 1.160396  |
| H | 1.319161  | 4.434465  | 0.347070  |
| H | -3.001415 | 1.777706  | 1.668334  |
| H | -1.991335 | 0.812254  | -1.037495 |
| H | -4.003949 | 1.468919  | 0.257571  |
| H | -0.246794 | -1.090168 | -2.573724 |
| H | -1.943273 | -1.567358 | -2.463239 |
| H | -0.697346 | -2.795931 | -2.591002 |
| H | -3.726124 | -2.956458 | -1.674567 |

|   |          |           |           |
|---|----------|-----------|-----------|
| H | 4.508084 | 1.030063  | -0.270941 |
| H | 3.879261 | 0.404046  | 1.251606  |
| H | 4.967809 | -1.301516 | -1.029185 |
| H | 6.983137 | -1.631060 | 0.399776  |
| H | 6.775121 | 0.069727  | -0.023493 |
| H | 6.334217 | -0.501773 | 1.589358  |
| H | 4.957054 | -3.157779 | 0.618884  |
| H | 3.330831 | -2.513044 | 0.411986  |
| H | 4.275391 | -2.085500 | 1.844025  |

mPW1PW91 energy = -1155.17002895 a.u.

(2S,6R,7S,8S)-1, Conf. V

|   |           |           |           |
|---|-----------|-----------|-----------|
| C | -4.014596 | -1.819689 | 0.165853  |
| C | -3.750348 | -0.352001 | 0.024973  |
| C | -3.336154 | 0.505449  | 0.955997  |
| C | -3.269424 | 0.200252  | 2.418362  |
| C | -1.521353 | -1.931432 | -0.463813 |
| C | -2.677251 | -2.640317 | 0.187906  |
| C | -1.505230 | 1.670533  | -0.307247 |
| C | -0.234290 | 1.212239  | 0.453279  |
| C | 0.262416  | -0.155010 | -0.065790 |
| C | -0.716097 | -1.211199 | 0.320002  |
| O | -1.182915 | 2.940285  | -0.921104 |
| C | 0.068023  | 3.340932  | -0.654850 |
| C | 0.716926  | 2.352382  | 0.237071  |
| O | 0.517731  | 4.364732  | -1.098302 |
| C | 1.921163  | 2.575733  | 0.745976  |
| C | -2.780977 | 1.843913  | 0.513915  |
| C | -1.450511 | -1.974026 | -1.957339 |
| O | -4.906757 | -2.282027 | -0.841304 |
| O | 1.524670  | -0.418312 | 0.585896  |
| C | 2.477457  | -1.030000 | -0.135260 |
| O | 2.361150  | -1.296890 | -1.305173 |
| C | 3.672085  | -1.374807 | 0.709323  |
| C | 5.000843  | -1.302818 | -0.040057 |
| C | 5.354108  | 0.134489  | -0.403607 |
| C | 6.106172  | -1.949535 | 0.784621  |
| H | -4.535427 | -2.035843 | 1.099238  |
| H | -3.752464 | -0.005712 | -1.008481 |
| H | -2.235731 | 0.217936  | 2.778668  |
| H | -3.698621 | -0.769382 | 2.669582  |
| H | -2.887768 | -3.603842 | -0.282887 |
| H | -2.428315 | -2.832367 | 1.233276  |
| H | -3.805863 | 0.964908  | 2.989057  |
| H | -0.453999 | 1.103909  | 1.517483  |
| H | 0.434480  | -0.106334 | -1.139014 |
| H | -0.865562 | -1.281443 | 1.395265  |
| H | 2.392954  | 1.889522  | 1.435898  |
| H | 2.457082  | 3.478255  | 0.474137  |
| H | -2.575978 | 2.487495  | 1.373075  |
| H | -1.711195 | 0.991778  | -1.135321 |
| H | -3.502518 | 2.369563  | -0.116507 |
| H | -1.452571 | -3.013162 | -2.298613 |
| H | -0.559519 | -1.492499 | -2.357315 |
| H | -2.325183 | -1.498260 | -2.414885 |
| H | -4.541318 | -2.057155 | -1.703279 |

|   |          |           |           |
|---|----------|-----------|-----------|
| H | 3.683935 | -0.743773 | 1.600501  |
| H | 3.495613 | -2.399841 | 1.056222  |
| H | 4.883342 | -1.871925 | -0.966828 |
| H | 6.285021 | 0.176011  | -0.973822 |
| H | 4.576178 | 0.602828  | -1.011074 |
| H | 5.490547 | 0.743002  | 0.495790  |
| H | 7.057658 | -1.925045 | 0.248409  |
| H | 5.877188 | -2.994184 | 1.009859  |
| H | 6.249235 | -1.427275 | 1.735571  |

mPW1PW91 energy = -1155.16997316 a.u.

(2S,6R,7S,8S)-1, Conf. W

|   |           |           |           |
|---|-----------|-----------|-----------|
| C | -3.534287 | -2.367884 | 0.214181  |
| C | -3.578657 | -0.875792 | 0.084971  |
| C | -3.307662 | 0.039581  | 1.013723  |
| C | -3.133955 | -0.255082 | 2.469507  |
| C | -1.096516 | -1.962117 | -0.501581 |
| C | -2.056382 | -2.895874 | 0.183951  |
| C | -1.787236 | 1.555288  | -0.290065 |
| C | -0.426495 | 1.352770  | 0.422969  |
| C | 0.323286  | 0.124883  | -0.140359 |
| C | -0.404533 | -1.112679 | 0.260548  |
| O | -1.744019 | 2.869102  | -0.894483 |
| C | -0.596137 | 3.514915  | -0.646895 |
| C | 0.263839  | 2.667980  | 0.211349  |
| O | -0.377486 | 4.615754  | -1.079842 |
| C | 1.405080  | 3.129420  | 0.705015  |
| C | -3.043119 | 1.465280  | 0.574502  |
| C | -1.108299 | -1.959498 | -1.997178 |
| O | -4.344637 | -2.996111 | -0.771609 |
| O | 1.634305  | 0.127785  | 0.464628  |
| C | 2.672551  | -0.246992 | -0.299435 |
| O | 2.564645  | -0.590942 | -1.449534 |
| C | 3.969271  | -0.129935 | 0.452510  |
| C | 5.063440  | -1.075753 | -0.034803 |
| C | 6.404575  | -0.679623 | 0.569504  |
| C | 4.723120  | -2.526465 | 0.283366  |
| H | -3.967934 | -2.694991 | 1.159465  |
| H | -3.686149 | -0.532079 | -0.944046 |
| H | -3.797777 | 0.380639  | 3.064065  |
| H | -2.115637 | -0.027199 | 2.800746  |
| H | -2.080744 | -3.881203 | -0.288451 |
| H | -1.736530 | -3.033758 | 1.218617  |
| H | -3.347244 | -1.293035 | 2.723397  |
| H | -0.583217 | 1.180157  | 1.489903  |
| H | 0.442231  | 0.218903  | -1.217871 |
| H | -0.481413 | -1.229942 | 1.339140  |
| H | 2.023570  | 2.546134  | 1.373549  |
| H | 1.734570  | 4.128557  | 0.442649  |
| H | -2.937001 | 2.127221  | 1.437650  |
| H | -1.882840 | 0.856832  | -1.121382 |
| H | -3.875953 | 1.845062  | -0.022631 |
| H | -0.350765 | -1.308525 | -2.430850 |
| H | -2.084199 | -1.646281 | -2.384672 |
| H | -0.937540 | -2.972284 | -2.373138 |
| H | -4.083560 | -2.672425 | -1.640073 |

|   |          |           |           |
|---|----------|-----------|-----------|
| H | 4.291428 | 0.910255  | 0.324936  |
| H | 3.776476 | -0.264909 | 1.519372  |
| H | 5.129456 | -0.969513 | -1.121569 |
| H | 7.201425 | -1.338862 | 0.217695  |
| H | 6.676359 | 0.344713  | 0.301861  |
| H | 6.381498 | -0.743141 | 1.661794  |
| H | 5.488486 | -3.201704 | -0.106400 |
| H | 3.768170 | -2.822608 | -0.156119 |
| H | 4.661059 | -2.685256 | 1.364414  |

mPW1PW91 energy = -1155.16996773 a.u.

(2S,6R,7S,8S)-1, Conf. X

|   |           |           |           |
|---|-----------|-----------|-----------|
| C | 2.679065  | -2.648227 | -0.322363 |
| C | 3.132661  | -1.224962 | -0.377841 |
| C | 2.840502  | -0.331124 | -1.325573 |
| C | 2.298620  | -0.661808 | -2.680973 |
| C | 0.910679  | -1.708605 | 1.314896  |
| C | 1.806035  | -2.867170 | 0.932018  |
| C | 1.880616  | 1.504994  | 0.067811  |
| C | 0.392236  | 1.366480  | -0.346658 |
| C | -0.362730 | 0.332144  | 0.518756  |
| C | 0.266902  | -1.011606 | 0.377312  |
| O | 2.080183  | 2.887271  | 0.441817  |
| C | 0.968638  | 3.623713  | 0.307882  |
| C | -0.122790 | 2.770488  | -0.218230 |
| O | 0.942186  | 4.794284  | 0.583748  |
| C | -1.304356 | 3.287932  | -0.527251 |
| C | 2.927542  | 1.140568  | -0.986560 |
| C | 0.910293  | -1.371570 | 2.772442  |
| O | 3.751167  | -3.585159 | -0.202768 |
| O | -1.714211 | 0.310136  | 0.004645  |
| C | -2.695526 | 0.006769  | 0.868538  |
| O | -2.506673 | -0.202943 | 2.041085  |
| C | -4.037408 | -0.014535 | 0.192390  |
| C | -4.168909 | -1.065686 | -0.917873 |
| C | -3.970416 | -2.476193 | -0.377745 |
| C | -5.523422 | -0.925785 | -1.600326 |
| H | 2.095151  | -2.888546 | -1.214623 |
| H | 3.572014  | -0.857748 | 0.548996  |
| H | 2.935872  | -0.207245 | -3.446412 |
| H | 1.298412  | -0.244971 | -2.835645 |
| H | 2.496881  | -3.052681 | 1.758974  |
| H | 1.230702  | -3.789637 | 0.807013  |
| H | 2.256460  | -1.731522 | -2.880105 |
| H | 0.318872  | 1.034544  | -1.383792 |
| H | -0.396496 | 0.667211  | 1.553465  |
| H | 0.315692  | -1.359162 | -0.650767 |
| H | -2.103279 | 2.693976  | -0.949788 |
| H | -1.483562 | 4.344192  | -0.360439 |
| H | 2.776414  | 1.760490  | -1.873640 |
| H | 2.075271  | 0.925482  | 0.970125  |
| H | 3.907993  | 1.393553  | -0.575449 |
| H | 0.179177  | -0.611312 | 3.040378  |
| H | 1.901842  | -1.037011 | 3.095968  |
| H | 0.686322  | -2.269525 | 3.356649  |
| H | 4.327372  | -3.468423 | -0.964915 |

|   |           |           |           |
|---|-----------|-----------|-----------|
| H | -4.786096 | -0.186356 | 0.967062  |
| H | -4.211914 | 0.980113  | -0.228153 |
| H | -3.389092 | -0.867328 | -1.659661 |
| H | -4.047480 | -3.213427 | -1.180416 |
| H | -2.991280 | -2.601358 | 0.090943  |
| H | -4.729766 | -2.717849 | 0.371646  |
| H | -5.627686 | -1.649317 | -2.412267 |
| H | -5.658966 | 0.072586  | -2.023782 |
| H | -6.339437 | -1.102342 | -0.893474 |

mPW1PW91 energy = -1155.16994486 a.u.

(2S,6R,7S,8S)-1, Conf. Y

|   |           |           |           |
|---|-----------|-----------|-----------|
| C | -2.753639 | -2.762941 | -0.060562 |
| C | -3.137454 | -1.322496 | -0.187020 |
| C | -3.159511 | -0.395225 | 0.772237  |
| C | -3.072573 | -0.671532 | 2.241182  |
| C | -0.397432 | -1.925062 | -0.332033 |
| C | -1.380227 | -2.983405 | -0.753995 |
| C | -1.975733 | 1.451422  | -0.461799 |
| C | -0.587292 | 1.238604  | 0.191734  |
| C | 0.360825  | 0.478345  | -0.763322 |
| C | -0.216431 | -0.863082 | -1.121005 |
| O | -2.060633 | 2.860138  | -0.781134 |
| C | -1.062146 | 3.566913  | -0.229058 |
| C | -0.148629 | 2.641096  | 0.482034  |
| O | -0.990557 | 4.762578  | -0.336879 |
| C | 0.836543  | 3.090308  | 1.247518  |
| C | -3.182778 | 1.072506  | 0.394193  |
| C | 0.185488  | -2.098683 | 1.035393  |
| O | -3.721880 | -3.657809 | -0.595952 |
| O | 1.644313  | 0.405663  | -0.116874 |
| C | 2.723329  | 0.391061  | -0.918754 |
| O | 2.653590  | 0.429615  | -2.122006 |
| C | 4.000293  | 0.331190  | -0.131117 |
| C | 4.203580  | -0.986414 | 0.631204  |
| C | 4.223573  | -2.183296 | -0.311269 |
| C | 5.484378  | -0.911050 | 1.452303  |
| H | -2.671580 | -3.046491 | 0.987601  |
| H | -3.239997 | -0.985313 | -1.218723 |
| H | -2.177548 | -0.219998 | 2.681126  |
| H | -3.078759 | -1.732629 | 2.484889  |
| H | -1.542518 | -2.934208 | -1.834642 |
| H | -1.034443 | -3.991957 | -0.512493 |
| H | -3.925369 | -0.209338 | 2.749270  |
| H | -0.682522 | 0.652249  | 1.104856  |
| H | 0.487172  | 1.061830  | -1.675840 |
| H | -0.681596 | -0.887453 | -2.101298 |
| H | 1.484056  | 2.424516  | 1.803080  |
| H | 1.006178  | 4.157608  | 1.335103  |
| H | -3.186028 | 1.693306  | 1.293633  |
| H | -2.038339 | 0.937337  | -1.418517 |
| H | -4.085758 | 1.324924  | -0.167985 |
| H | 0.867684  | -2.955561 | 1.036735  |
| H | -0.593460 | -2.331035 | 1.766295  |
| H | 0.741335  | -1.230491 | 1.379509  |
| H | -3.844304 | -3.448834 | -1.528407 |

|   |          |           |           |
|---|----------|-----------|-----------|
| H | 4.818568 | 0.485506  | -0.835552 |
| H | 3.999843 | 1.163657  | 0.577348  |
| H | 3.362954 | -1.105366 | 1.321640  |
| H | 4.360650 | -3.112462 | 0.246793  |
| H | 3.294327 | -2.273480 | -0.878842 |
| H | 5.043954 | -2.102843 | -1.030508 |
| H | 5.636566 | -1.831810 | 2.020290  |
| H | 5.458445 | -0.081189 | 2.162929  |
| H | 6.356837 | -0.771504 | 0.807274  |

mPW1PW91energy = -1155.16986272 a.u.

(1R,5S,6S,7S,10R)-2, Conf. A

|   |           |           |           |
|---|-----------|-----------|-----------|
| C | 3.442704  | 0.014453  | -0.243782 |
| C | 2.919867  | 1.391063  | -0.659693 |
| C | 1.576665  | 1.652446  | -0.043458 |
| C | 0.567980  | 0.580973  | -0.380021 |
| C | 1.048466  | -0.782142 | 0.191534  |
| C | 2.413742  | -1.076480 | -0.476247 |
| C | -0.882091 | 0.924883  | -0.038548 |
| C | -1.841076 | -0.188004 | -0.455241 |
| C | -1.396006 | -1.520479 | 0.141487  |
| C | 0.041050  | -1.858875 | -0.231534 |
| C | -3.317037 | 0.163052  | -0.174686 |
| C | -4.265175 | -0.776766 | -0.913850 |
| C | -3.672924 | 0.222059  | 1.308104  |
| O | -1.283327 | 2.101941  | -0.735982 |
| C | 1.358116  | 2.687694  | 0.765027  |
| O | 2.998430  | -2.292476 | -0.028332 |
| H | 0.591580  | 0.471738  | -1.474880 |
| C | 1.188159  | -0.758786 | 1.713668  |
| H | 3.719827  | 0.024406  | 0.813811  |
| H | 4.346936  | -0.230329 | -0.805862 |
| H | 3.632636  | 2.168201  | -0.378586 |
| H | 2.820452  | 1.419217  | -1.751419 |
| H | 2.225814  | -1.148290 | -1.557668 |
| H | -0.973860 | 1.096970  | 1.041585  |
| H | -1.744786 | -0.266161 | -1.547027 |
| H | -2.052888 | -2.318946 | -0.211420 |
| H | -1.502200 | -1.498680 | 1.229370  |
| H | 0.102132  | -1.986811 | -1.319471 |
| H | 0.315145  | -2.818804 | 0.218619  |
| H | -3.469901 | 1.163681  | -0.587646 |
| H | -4.217328 | -1.797939 | -0.526285 |
| H | -5.300156 | -0.440632 | -0.810271 |
| H | -4.036589 | -0.813630 | -1.982552 |
| H | -4.697036 | 0.581807  | 1.436496  |
| H | -3.021613 | 0.900012  | 1.864633  |
| H | -3.615346 | -0.761387 | 1.782417  |
| H | -0.605063 | 2.771391  | -0.596193 |
| H | 0.409255  | 2.856072  | 1.263602  |
| H | 2.146387  | 3.402086  | 0.978209  |
| H | 2.435998  | -3.021952 | -0.304721 |
| H | 1.616291  | -1.700421 | 2.062260  |
| H | 1.834742  | 0.050178  | 2.054158  |
| H | 0.224111  | -0.628050 | 2.206786  |

mPW1PW91 energy = -737.762624271 a.u.

(1R,5S,6S,7S,10R)-2, Conf. B

|   |           |           |           |
|---|-----------|-----------|-----------|
| C | 3.440520  | 0.020947  | -0.264638 |
| C | 2.912494  | 1.401301  | -0.664004 |
| C | 1.574113  | 1.650677  | -0.033724 |
| C | 0.566367  | 0.582475  | -0.381525 |
| C | 1.043986  | -0.788633 | 0.173096  |
| C | 2.412965  | -1.080426 | -0.486664 |
| C | -0.884280 | 0.923612  | -0.037317 |
| C | -1.845117 | -0.186002 | -0.458853 |
| C | -1.395617 | -1.525471 | 0.119949  |
| C | 0.038495  | -1.857717 | -0.267327 |
| C | -3.319199 | 0.162873  | -0.165506 |
| C | -4.272023 | -0.767689 | -0.910321 |
| C | -3.666524 | 0.202933  | 1.320006  |
| O | -1.285077 | 2.105917  | -0.726519 |
| C | 1.359318  | 2.672211  | 0.793016  |
| O | 2.942165  | -2.345024 | -0.110546 |
| H | 0.590679  | 0.483751  | -1.477167 |
| C | 1.171421  | -0.779045 | 1.697705  |
| H | 3.731544  | 0.035203  | 0.791373  |
| H | 4.339733  | -0.219491 | -0.836887 |
| H | 3.625929  | 2.177872  | -0.382507 |
| H | 2.803678  | 1.437270  | -1.754400 |
| H | 2.229919  | -1.172086 | -1.562618 |
| H | -0.976043 | 1.090047  | 1.043548  |
| H | -1.755427 | -0.252830 | -1.551904 |
| H | -2.054874 | -2.319293 | -0.239220 |
| H | -1.496715 | -1.517302 | 1.208889  |
| H | 0.095626  | -1.958642 | -1.357683 |
| H | 0.332645  | -2.823455 | 0.150229  |
| H | -3.474674 | 1.168617  | -0.564904 |
| H | -4.222433 | -1.793200 | -0.534719 |
| H | -5.306257 | -0.432181 | -0.797305 |
| H | -4.049018 | -0.792677 | -1.980514 |
| H | -4.690019 | 0.560489  | 1.459137  |
| H | -3.012276 | 0.873904  | 1.881681  |
| H | -3.605768 | -0.786632 | 1.780917  |
| H | -0.608886 | 2.775625  | -0.578549 |
| H | 0.412681  | 2.831521  | 1.298681  |
| H | 2.147316  | 3.385204  | 1.011956  |
| H | 3.267914  | -2.279246 | 0.792866  |
| H | 1.889183  | -0.036983 | 2.049023  |
| H | 0.220567  | -0.554426 | 2.181540  |
| H | 1.486750  | -1.760491 | 2.061708  |

mPW1PW91 energy = -737.762492816 a.u.

(1R,5S,6S,7S,10R)-2, Conf. C

|   |           |           |           |
|---|-----------|-----------|-----------|
| C | 3.437942  | 0.021327  | -0.231255 |
| C | 2.917790  | 1.396101  | -0.658700 |
| C | 1.574134  | 1.653300  | -0.041608 |
| C | 0.567239  | 0.581516  | -0.382771 |
| C | 1.043962  | -0.786316 | 0.182323  |
| C | 2.409475  | -1.075163 | -0.470708 |
| C | -0.883254 | 0.922717  | -0.039540 |

|   |           |           |           |
|---|-----------|-----------|-----------|
| C | -1.843419 | -0.187755 | -0.460604 |
| C | -1.395365 | -1.526781 | 0.119805  |
| C | 0.041248  | -1.860142 | -0.257027 |
| C | -3.317809 | 0.161397  | -0.168552 |
| C | -4.270354 | -0.771236 | -0.911129 |
| C | -3.665618 | 0.205067  | 1.316782  |
| O | -1.284437 | 2.103180  | -0.732144 |
| C | 1.355715  | 2.683968  | 0.772779  |
| O | 2.880409  | -2.330156 | 0.005528  |
| H | 0.590950  | 0.476880  | -1.477805 |
| C | 1.168204  | -0.770537 | 1.707099  |
| H | 3.704431  | 0.036397  | 0.828826  |
| H | 4.350977  | -0.218335 | -0.785658 |
| H | 3.628856  | 2.176136  | -0.381111 |
| H | 2.818559  | 1.417519  | -1.750517 |
| H | 2.228805  | -1.149365 | -1.553398 |
| H | -0.975169 | 1.091188  | 1.041009  |
| H | -1.752896 | -0.255080 | -1.553637 |
| H | -2.051913 | -2.321125 | -0.243243 |
| H | -1.503100 | -1.519027 | 1.207859  |
| H | 0.105698  | -1.969124 | -1.346347 |
| H | 0.332205  | -2.821807 | 0.171214  |
| H | -3.473395 | 1.166146  | -0.570421 |
| H | -4.220809 | -1.795663 | -0.532564 |
| H | -5.304658 | -0.435503 | -0.799339 |
| H | -4.047097 | -0.799276 | -1.981227 |
| H | -4.689157 | 0.563065  | 1.454648  |
| H | -3.011478 | 0.877196  | 1.877125  |
| H | -3.605076 | -0.783305 | 1.780232  |
| H | -0.608176 | 2.773237  | -0.586135 |
| H | 0.407438  | 2.848191  | 1.273799  |
| H | 2.143124  | 3.398658  | 0.988228  |
| H | 3.727720  | -2.508119 | -0.413834 |
| H | 1.835005  | 0.017733  | 2.057515  |
| H | 0.202468  | -0.609418 | 2.187432  |
| H | 1.559571  | -1.726174 | 2.058901  |

mPW1PW91 energy = -737.762028762 a.u.

(1R,5S,6S,7S,10R)-2, Conf. D

|   |           |           |           |
|---|-----------|-----------|-----------|
| C | 3.396062  | 0.422836  | -0.243759 |
| C | 2.660631  | 1.717395  | -0.594251 |
| C | 1.302349  | 1.734596  | 0.044691  |
| C | 0.465578  | 0.539882  | -0.346549 |
| C | 1.159890  | -0.761075 | 0.144437  |
| C | 2.548723  | -0.800932 | -0.536114 |
| C | -1.015862 | 0.636258  | 0.023935  |
| C | -1.803550 | -0.580861 | -0.454769 |
| C | -1.137628 | -1.865349 | 0.039360  |
| C | 0.330666  | -1.953295 | -0.348215 |
| C | -3.307870 | -0.573715 | -0.089416 |
| C | -3.588526 | -0.150749 | 1.349701  |
| C | -4.168838 | 0.229660  | -1.060157 |
| O | -1.594429 | 1.787874  | -0.584581 |
| C | 0.945189  | 2.674162  | 0.918130  |
| O | 3.317044  | -1.934546 | -0.155693 |
| H | 0.491361  | 0.495364  | -1.445885 |



|   |           |           |           |
|---|-----------|-----------|-----------|
| C | 1.301724  | -0.808221 | 1.665713  |
| H | 3.670092  | 0.425248  | 0.814609  |
| H | 4.325997  | 0.351277  | -0.812694 |
| H | 3.247244  | 2.583108  | -0.282021 |
| H | 2.543269  | 1.777753  | -1.682943 |
| H | 2.365626  | -0.840513 | -1.620131 |
| H | -1.113741 | 0.715665  | 1.114128  |
| H | -1.735567 | -0.575658 | -1.550568 |
| H | -1.672760 | -2.721397 | -0.381036 |
| H | -1.245288 | -1.945744 | 1.125282  |
| H | 0.404409  | -2.001057 | -1.441880 |
| H | 0.753136  | -2.886120 | 0.040915  |
| H | -3.627612 | -1.618977 | -0.182180 |
| H | -2.990251 | -0.712105 | 2.071943  |
| H | -3.388511 | 0.913039  | 1.498798  |
| H | -4.639421 | -0.322267 | 1.596795  |
| H | -3.951448 | 1.296154  | -0.999858 |
| H | -5.230127 | 0.083899  | -0.838708 |
| H | -4.001724 | -0.086663 | -2.093384 |
| H | -1.008679 | 2.533533  | -0.412291 |
| H | -0.006724 | 2.665788  | 1.438274  |
| H | 1.620432  | 3.486858  | 1.164102  |
| H | 2.859786  | -2.726152 | -0.454408 |
| H | 1.887533  | -1.681143 | 1.959314  |
| H | 1.799203  | 0.077922  | 2.060365  |
| H | 0.331615  | -0.877975 | 2.159231  |

mPW1PW91 energy = -737.760619359 a.u.

(1R,5S,6S,7S,10R)-2, Conf. E

|   |           |           |           |
|---|-----------|-----------|-----------|
| C | 3.392499  | 0.427241  | -0.269760 |
| C | 2.651608  | 1.724991  | -0.599583 |
| C | 1.300769  | 1.731922  | 0.054611  |
| C | 0.463697  | 0.540785  | -0.344976 |
| C | 1.156831  | -0.767527 | 0.127955  |
| C | 2.546870  | -0.807152 | -0.548762 |
| C | -1.017829 | 0.634042  | 0.028887  |
| C | -1.806992 | -0.579079 | -0.457594 |
| C | -1.138133 | -1.867427 | 0.023518  |
| C | 0.326323  | -1.951642 | -0.376078 |
| C | -3.310719 | -0.573979 | -0.090451 |
| C | -3.590331 | -0.162296 | 1.352117  |
| C | -4.172621 | 0.236671  | -1.054320 |
| O | -1.596136 | 1.792029  | -0.567880 |
| C | 0.950229  | 2.660097  | 0.942957  |
| O | 3.267763  | -1.993174 | -0.241890 |
| H | 0.487049  | 0.506509  | -1.444554 |
| C | 1.295610  | -0.830087 | 1.650325  |
| H | 3.684417  | 0.434775  | 0.785960  |
| H | 4.314299  | 0.359465  | -0.852382 |
| H | 3.240416  | 2.589345  | -0.287213 |
| H | 2.521947  | 1.793271  | -1.686221 |
| H | 2.369183  | -0.868498 | -1.627694 |
| H | -1.114651 | 0.704178  | 1.119800  |
| H | -1.740970 | -0.565414 | -1.553443 |
| H | -1.676586 | -2.719810 | -0.400318 |
| H | -1.240050 | -1.957012 | 1.109677  |

|   |           |           |           |
|---|-----------|-----------|-----------|
| H | 0.392764  | -1.979505 | -1.470301 |
| H | 0.767970  | -2.882788 | -0.013758 |
| H | -3.630398 | -1.618496 | -0.190893 |
| H | -4.641278 | -0.334828 | 1.598445  |
| H | -2.992288 | -0.730497 | 2.069223  |
| H | -3.389242 | 0.900100  | 1.509720  |
| H | -5.233859 | 0.088536  | -0.834005 |
| H | -4.005355 | -0.071314 | -2.090019 |
| H | -3.955906 | 1.302833  | -0.985576 |
| H | -1.010983 | 2.535996  | -0.386641 |
| H | 0.002081  | 2.644534  | 1.469820  |
| H | 1.625789  | 3.471506  | 1.192383  |
| H | 3.583682  | -1.927790 | 0.665092  |
| H | 0.325298  | -0.795604 | 2.146585  |
| H | 1.772298  | -1.766516 | 1.952440  |
| H | 1.884496  | -0.003180 | 2.048955  |

mPW1PW91 energy = -737.760531328 a.u.

(1R,5S,6S,7S,10R)-2, Conf. F

|   |           |           |           |
|---|-----------|-----------|-----------|
| C | 3.389704  | 0.426058  | -0.240255 |
| C | 2.655826  | 1.720735  | -0.596803 |
| C | 1.300024  | 1.733943  | 0.047345  |
| C | 0.464373  | 0.538998  | -0.345307 |
| C | 1.156961  | -0.766088 | 0.139805  |
| C | 2.541578  | -0.802902 | -0.533743 |
| C | -1.017016 | 0.633327  | 0.027134  |
| C | -1.804942 | -0.581406 | -0.457268 |
| C | -1.138007 | -1.868201 | 0.029820  |
| C | 0.329125  | -1.955563 | -0.359764 |
| C | -3.309482 | -0.575212 | -0.093275 |
| C | -3.591677 | -0.158185 | 1.347257  |
| C | -4.169936 | 0.231672  | -1.061608 |
| O | -1.595375 | 1.788645  | -0.575319 |
| C | 0.945829  | 2.669386  | 0.926474  |
| O | 3.207098  | -1.993959 | -0.131368 |
| H | 0.488328  | 0.497590  | -1.444534 |
| C | 1.293745  | -0.818875 | 1.662465  |
| H | 3.660640  | 0.431402  | 0.818743  |
| H | 4.323189  | 0.360812  | -0.808561 |
| H | 3.242023  | 2.588402  | -0.288997 |
| H | 2.535447  | 1.776283  | -1.685336 |
| H | 2.359413  | -0.844616 | -1.617921 |
| H | -1.114724 | 0.707552  | 1.117642  |
| H | -1.736383 | -0.570705 | -1.553049 |
| H | -1.673934 | -2.721846 | -0.394784 |
| H | -1.246386 | -1.954940 | 1.115425  |
| H | 0.403118  | -1.993138 | -1.453357 |
| H | 0.766384  | -2.883480 | 0.015314  |
| H | -3.628827 | -1.620171 | -0.190391 |
| H | -4.642936 | -0.330303 | 1.592606  |
| H | -2.994335 | -0.723070 | 2.067499  |
| H | -3.391303 | 0.904903  | 1.501055  |
| H | -5.231503 | 0.084017  | -0.842530 |
| H | -4.000883 | -0.079938 | -2.095968 |
| H | -3.953625 | 1.298140  | -0.996348 |
| H | -1.009605 | 2.533227  | -0.398762 |

|   |           |           |           |
|---|-----------|-----------|-----------|
| H | -0.003618 | 2.656945  | 1.451014  |
| H | 1.620583  | 3.482500  | 1.172477  |
| H | 4.073428  | -2.006124 | -0.549402 |
| H | 0.319532  | -0.855402 | 2.151319  |
| H | 1.847111  | -1.711891 | 1.956497  |
| H | 1.818452  | 0.050244  | 2.060188  |

mPW1PW91 energy = -737.760100789 a.u.

(1R,5S,6S,7S,10R)-2, Conf. G

|   |           |           |           |
|---|-----------|-----------|-----------|
| C | 3.454348  | -0.004267 | -0.212905 |
| C | 2.951311  | 1.381997  | -0.612780 |
| C | 1.596014  | 1.660689  | -0.027155 |
| C | 0.575603  | 0.606475  | -0.388899 |
| C | 1.037189  | -0.779299 | 0.152633  |
| C | 2.416672  | -1.082519 | -0.479341 |
| C | -0.879575 | 0.940469  | -0.038980 |
| C | -1.846626 | -0.173449 | -0.461511 |
| C | -1.394415 | -1.529098 | 0.073962  |
| C | 0.040047  | -1.842068 | -0.319611 |
| C | -3.314745 | 0.166027  | -0.130349 |
| C | -4.284295 | -0.727489 | -0.898306 |
| C | -3.636722 | 0.137302  | 1.361432  |
| O | -1.267263 | 2.179684  | -0.624150 |
| C | 1.376141  | 2.706977  | 0.762242  |
| O | 2.913298  | -2.363665 | -0.113230 |
| H | 0.604915  | 0.511446  | -1.487503 |
| C | 1.133420  | -0.786825 | 1.679970  |
| H | 3.714364  | -0.006179 | 0.851308  |
| H | 4.366250  | -0.251472 | -0.762034 |
| H | 3.665128  | 2.149865  | -0.308726 |
| H | 2.878056  | 1.426630  | -1.706677 |
| H | 2.258689  | -1.152067 | -1.561295 |
| H | -0.964995 | 1.109546  | 1.037312  |
| H | -1.778977 | -0.220845 | -1.559557 |
| H | -2.052303 | -2.313723 | -0.308223 |
| H | -1.495294 | -1.553802 | 1.162216  |
| H | 0.102246  | -1.913127 | -1.412359 |
| H | 0.340247  | -2.816446 | 0.072457  |
| H | -3.472438 | 1.190911  | -0.477355 |
| H | -5.315407 | -0.396676 | -0.749145 |
| H | -4.083441 | -0.706397 | -1.973114 |
| H | -4.229254 | -1.768939 | -0.570045 |
| H | -2.967182 | 0.774000  | 1.944506  |
| H | -3.578803 | -0.874181 | 1.771626  |
| H | -4.654226 | 0.496992  | 1.534408  |
| H | -1.126376 | 2.114947  | -1.574786 |
| H | 0.401792  | 2.926500  | 1.179036  |
| H | 2.179329  | 3.397312  | 1.000660  |
| H | 3.235180  | -2.313848 | 0.792549  |
| H | 1.449399  | -1.769762 | 2.039525  |
| H | 1.837050  | -0.042532 | 2.053920  |
| H | 0.171575  | -0.575832 | 2.147927  |

mPW1PW91 energy = -737.760032458 a.u.

(1R,5S,6S,7S,10R)-2, Conf. H

|   |          |           |           |
|---|----------|-----------|-----------|
| C | 3.455995 | -0.011253 | -0.189766 |
|---|----------|-----------|-----------|

|   |           |           |           |
|---|-----------|-----------|-----------|
| C | 2.959136  | 1.370934  | -0.607752 |
| C | 1.598175  | 1.662574  | -0.040298 |
| C | 0.576838  | 0.604011  | -0.389003 |
| C | 1.042058  | -0.773422 | 0.171506  |
| C | 2.417960  | -1.079322 | -0.468279 |
| C | -0.877445 | 0.940139  | -0.039227 |
| C | -1.842626 | -0.176404 | -0.458593 |
| C | -1.395245 | -1.524735 | 0.097103  |
| C | 0.042543  | -1.845272 | -0.280149 |
| C | -3.313102 | 0.165737  | -0.141288 |
| C | -4.276996 | -0.739053 | -0.903139 |
| C | -3.644670 | 0.159508  | 1.348625  |
| O | -1.267770 | 2.176405  | -0.628116 |
| C | 1.373757  | 2.725121  | 0.725826  |
| O | 2.970006  | -2.313856 | -0.029053 |
| H | 0.603936  | 0.496995  | -1.486825 |
| C | 1.152836  | -0.763661 | 1.696586  |
| H | 3.699944  | -0.017185 | 0.875934  |
| H | 4.373573  | -0.263231 | -0.726764 |
| H | 3.671448  | 2.139745  | -0.302976 |
| H | 2.898124  | 1.406697  | -1.702936 |
| H | 2.256624  | -1.128186 | -1.555657 |
| H | -0.961298 | 1.110961  | 1.037071  |
| H | -1.767646 | -0.235316 | -1.555558 |
| H | -2.050121 | -2.315052 | -0.278233 |
| H | -1.502508 | -1.533614 | 1.184616  |
| H | 0.109801  | -1.948352 | -1.370595 |
| H | 0.319694  | -2.813656 | 0.149506  |
| H | -3.468493 | 1.185258  | -0.504474 |
| H | -4.068723 | -0.732640 | -1.976758 |
| H | -4.224540 | -1.775806 | -0.559850 |
| H | -5.309112 | -0.406231 | -0.766054 |
| H | -4.663271 | 0.521660  | 1.509426  |
| H | -2.978895 | 0.805100  | 1.926089  |
| H | -3.589607 | -0.845362 | 1.775384  |
| H | -1.107281 | 2.117426  | -1.575954 |
| H | 0.396670  | 2.955423  | 1.129975  |
| H | 2.177431  | 3.416938  | 0.958209  |
| H | 2.403732  | -3.028923 | -0.333314 |
| H | 1.783132  | 0.049814  | 2.056122  |
| H | 0.179073  | -0.648355 | 2.174184  |
| H | 1.585133  | -1.703919 | 2.043880  |

mPW1PW91 energy = -737.760001242 a.u.

(1R,5S,6S,7S,10R)-2, Conf. I

|   |           |           |           |
|---|-----------|-----------|-----------|
| C | 3.450887  | -0.006164 | -0.173102 |
| C | 2.958863  | 1.374399  | -0.603911 |
| C | 1.596672  | 1.663611  | -0.037989 |
| C | 0.576556  | 0.605526  | -0.391985 |
| C | 1.036586  | -0.777217 | 0.160612  |
| C | 2.413124  | -1.077525 | -0.462720 |
| C | -0.877991 | 0.939096  | -0.039995 |
| C | -1.844981 | -0.174571 | -0.463894 |
| C | -1.394628 | -1.531334 | 0.069707  |
| C | 0.042917  | -1.844829 | -0.311830 |
| C | -3.313151 | 0.164544  | -0.131960 |

|   |           |           |           |
|---|-----------|-----------|-----------|
| C | -4.282985 | -0.730645 | -0.897640 |
| C | -3.633864 | 0.138058  | 1.360188  |
| O | -1.267896 | 2.178223  | -0.624152 |
| C | 1.372098  | 2.722984  | 0.732506  |
| O | 2.847571  | -2.352429 | -0.003572 |
| H | 0.603691  | 0.504196  | -1.490010 |
| C | 1.128698  | -0.777525 | 1.688193  |
| H | 3.681783  | -0.007294 | 0.895354  |
| H | 4.378099  | -0.253442 | -0.700474 |
| H | 3.669823  | 2.145744  | -0.302287 |
| H | 2.899717  | 1.402427  | -1.699333 |
| H | 2.260588  | -1.124989 | -1.551774 |
| H | -0.961350 | 1.106824  | 1.036698  |
| H | -1.777464 | -0.219733 | -1.562124 |
| H | -2.048925 | -2.315305 | -0.319959 |
| H | -1.504199 | -1.559795 | 1.156757  |
| H | 0.113998  | -1.923592 | -1.403633 |
| H | 0.339093  | -2.815711 | 0.090909  |
| H | -3.471801 | 1.188820  | -0.480279 |
| H | -4.082742 | -0.711671 | -1.972640 |
| H | -4.227728 | -1.771395 | -0.567241 |
| H | -5.314058 | -0.399612 | -0.748598 |
| H | -4.651216 | 0.498109  | 1.533426  |
| H | -2.963691 | 0.775449  | 1.941704  |
| H | -3.575690 | -0.872680 | 1.772126  |
| H | -1.127564 | 2.114135  | -1.574888 |
| H | 0.394893  | 2.950986  | 1.137595  |
| H | 2.175224  | 3.414644  | 0.967321  |
| H | 3.725228  | -2.512743 | -0.363476 |
| H | 1.773046  | 0.019077  | 2.060889  |
| H | 0.151230  | -0.639046 | 2.151499  |
| H | 1.529815  | -1.730204 | 2.037151  |

mPW1PW91 energy = -737.759535593 a.u.

(1R,5S,6S,7S,10R)-2, Conf. J

|   |           |           |           |
|---|-----------|-----------|-----------|
| C | 3.455176  | -0.007508 | -0.205268 |
| C | 2.952645  | 1.373279  | -0.623180 |
| C | 1.593899  | 1.661234  | -0.049427 |
| C | 0.577236  | 0.599047  | -0.398957 |
| C | 1.044478  | -0.768872 | 0.180559  |
| C | 2.416378  | -1.079958 | -0.465539 |
| C | -0.874390 | 0.935774  | -0.062642 |
| C | -1.836850 | -0.190390 | -0.463203 |
| C | -1.391923 | -1.522749 | 0.131385  |
| C | 0.044427  | -1.850214 | -0.245530 |
| C | -3.313718 | 0.149563  | -0.170820 |
| C | -4.262205 | -0.823573 | -0.865849 |
| C | -3.650602 | 0.251013  | 1.314740  |
| O | -1.184076 | 2.129922  | -0.778576 |
| C | 1.371761  | 2.718151  | 0.724550  |
| O | 2.973053  | -2.309046 | -0.015953 |
| H | 0.607782  | 0.489469  | -1.493816 |
| C | 1.167043  | -0.740383 | 1.704694  |
| H | 3.711533  | -0.008483 | 0.857607  |
| H | 4.367084  | -0.260628 | -0.751386 |
| H | 3.665077  | 2.143773  | -0.322875 |

|   |           |           |           |
|---|-----------|-----------|-----------|
| H | 2.884056  | 1.408165  | -1.717664 |
| H | 2.247193  | -1.141320 | -1.550734 |
| H | -0.958462 | 1.127337  | 1.014008  |
| H | -1.749971 | -0.271436 | -1.555425 |
| H | -2.045814 | -2.322805 | -0.223666 |
| H | -1.496696 | -1.505066 | 1.219406  |
| H | 0.104827  | -1.974646 | -1.333998 |
| H | 0.325293  | -2.809364 | 0.201947  |
| H | -3.505772 | 1.130562  | -0.621120 |
| H | -4.204508 | -1.826720 | -0.436270 |
| H | -5.298192 | -0.489379 | -0.767990 |
| H | -4.039627 | -0.902971 | -1.933262 |
| H | -4.680424 | 0.591906  | 1.447662  |
| H | -3.005585 | 0.956657  | 1.843869  |
| H | -3.564453 | -0.716357 | 1.815944  |
| H | -2.013780 | 2.480182  | -0.443576 |
| H | 0.396371  | 2.943279  | 1.136557  |
| H | 2.173775  | 3.411675  | 0.957185  |
| H | 2.410288  | -3.028239 | -0.316925 |
| H | 1.591815  | -1.680882 | 2.060723  |
| H | 1.808385  | 0.070692  | 2.049375  |
| H | 0.197852  | -0.608889 | 2.187578  |

mPW1PW91 energy = -737.759349994 a.u.

(1R,5S,6S,7S,10R)-2, Conf. K

|   |           |           |           |
|---|-----------|-----------|-----------|
| C | 3.452944  | -0.000967 | -0.230430 |
| C | 2.944113  | 1.383556  | -0.630835 |
| C | 1.591309  | 1.659347  | -0.038888 |
| C | 0.575451  | 0.600398  | -0.398405 |
| C | 1.040013  | -0.775221 | 0.163494  |
| C | 2.414559  | -1.083875 | -0.476626 |
| C | -0.876590 | 0.934497  | -0.059653 |
| C | -1.840595 | -0.188439 | -0.465810 |
| C | -1.391498 | -1.527638 | 0.111690  |
| C | 0.041796  | -1.848975 | -0.279931 |
| C | -3.315991 | 0.149197  | -0.162931 |
| C | -4.267832 | -0.815500 | -0.865163 |
| C | -3.646402 | 0.233436  | 1.325129  |
| O | -1.183761 | 2.134398  | -0.767184 |
| C | 1.373659  | 2.702225  | 0.755122  |
| O | 2.917033  | -2.359611 | -0.098969 |
| H | 0.606338  | 0.501417  | -1.494076 |
| C | 1.150841  | -0.760769 | 1.690003  |
| H | 3.726186  | 0.002951  | 0.830549  |
| H | 4.358618  | -0.249874 | -0.789075 |
| H | 3.658095  | 2.153324  | -0.331916 |
| H | 2.863010  | 1.426623  | -1.723962 |
| H | 2.247190  | -1.166443 | -1.556016 |
| H | -0.961360 | 1.120368  | 1.017903  |
| H | -1.758929 | -0.258640 | -1.559157 |
| H | -2.047968 | -2.323013 | -0.249273 |
| H | -1.491067 | -1.523003 | 1.200745  |
| H | 0.097469  | -1.945330 | -1.370873 |
| H | 0.344573  | -2.813743 | 0.133363  |
| H | -3.511091 | 1.135358  | -0.600782 |
| H | -4.049871 | -0.881931 | -1.934376 |

|   |           |           |           |
|---|-----------|-----------|-----------|
| H | -4.207834 | -1.823719 | -0.448079 |
| H | -5.303372 | -0.482513 | -0.758520 |
| H | -2.999647 | 0.933600  | 1.859475  |
| H | -3.557108 | -0.739583 | 1.814679  |
| H | -4.675911 | 0.571838  | 1.466697  |
| H | -2.021877 | 2.474088  | -0.442464 |
| H | 0.401004  | 2.917425  | 1.178888  |
| H | 2.175272  | 3.394906  | 0.991709  |

|   |          |           |          |
|---|----------|-----------|----------|
| H | 3.246581 | -2.297750 | 0.803251 |
| H | 1.861533 | -0.014691 | 2.046402 |
| H | 0.194229 | -0.537379 | 2.163022 |
| H | 1.465102 | -1.740226 | 2.060516 |

mPW1PW91 energy = -737.759296796 a.u.

**Table S38.** Cartesian coordinates and energies of the low-energy conformers calculated at the  $\omega$ B97XD/6-31+G(d,p) *in vacuo* level.

|                          |           |           |           |                                             |           |           |           |
|--------------------------|-----------|-----------|-----------|---------------------------------------------|-----------|-----------|-----------|
| (2S,6R,7S,8R)-1, Conf. A |           |           |           | H                                           | 4.631999  | -1.032153 | -2.968982 |
| C                        | -4.304780 | -0.627320 | -0.621733 | H                                           | 5.878306  | -1.379024 | -1.756089 |
| C                        | -3.317387 | 0.430322  | -1.029116 | $\omega$ B97XD energy = -1154.82248790 a.u. |           |           |           |
| C                        | -2.907432 | 1.487862  | -0.317513 | (2S,6R,7S,8R)-1, Conf. B                    |           |           |           |
| C                        | -3.554786 | 1.990280  | 0.947169  | C                                           | -4.342666 | -0.906345 | -0.521053 |
| C                        | -2.349652 | -1.734333 | 0.500305  | C                                           | -3.465456 | 0.222327  | -0.985254 |
| C                        | -3.555168 | -1.962547 | -0.378761 | C                                           | -3.116840 | 1.324488  | -0.309507 |
| C                        | -0.409692 | 1.303639  | -0.687817 | C                                           | -3.750928 | 1.796872  | 0.973279  |
| C                        | -0.140739 | 0.617495  | 0.679655  | C                                           | -2.257660 | -1.809255 | 0.556138  |
| C                        | 0.040027  | -0.917050 | 0.585110  | C                                           | -3.470108 | -2.163843 | -0.269657 |
| C                        | -1.150982 | -1.558620 | -0.065463 | C                                           | -0.629060 | 1.337090  | -0.781243 |
| O                        | 0.757432  | 2.092162  | -0.990151 | C                                           | -0.239618 | 0.717631  | 0.588610  |
| C                        | 1.615915  | 2.165263  | 0.050139  | C                                           | 0.058568  | -0.800859 | 0.532807  |
| C                        | 1.093966  | 1.323500  | 1.164252  | C                                           | -1.097893 | -1.553008 | -0.058024 |
| O                        | 2.627922  | 2.817226  | 0.013031  | O                                           | 0.450746  | 2.210622  | -1.161849 |
| C                        | 1.701772  | 1.249033  | 2.344891  | C                                           | 1.347180  | 2.388455  | -0.166945 |
| C                        | -1.639832 | 2.224006  | -0.721604 | C                                           | 0.953380  | 1.537840  | 0.992760  |
| C                        | -2.625421 | -1.500780 | 1.961518  | O                                           | 2.294021  | 3.125291  | -0.268000 |
| O                        | -5.265673 | -0.899238 | -1.633764 | C                                           | 1.623677  | 1.548493  | 2.141437  |
| O                        | 1.192351  | -1.170837 | -0.230143 | C                                           | -1.931493 | 2.152737  | -0.779290 |
| C                        | 2.254510  | -1.797025 | 0.328706  | C                                           | -2.500714 | -1.562333 | 2.020915  |
| O                        | 2.269312  | -2.194905 | 1.470548  | O                                           | -5.304444 | -1.289741 | -1.495251 |
| C                        | 3.387663  | -1.893895 | -0.657915 | O                                           | 1.202546  | -0.998194 | -0.313063 |
| C                        | 4.057630  | -0.528696 | -0.923507 | C                                           | 2.339588  | -1.467170 | 0.246262  |
| C                        | 4.698466  | 0.037275  | 0.344620  | O                                           | 2.444184  | -1.742524 | 1.419683  |
| C                        | 5.090971  | -0.671471 | -2.042580 | C                                           | 3.437114  | -1.612551 | -0.777594 |
| H                        | -4.817706 | -0.341254 | 0.305752  | C                                           | 4.781810  | -1.057905 | -0.282388 |
| H                        | -2.783341 | 0.188551  | -1.949712 | C                                           | 5.887012  | -1.392493 | -1.285580 |
| H                        | -4.468040 | 1.455301  | 1.213642  | C                                           | 4.695823  | 0.450416  | -0.039768 |
| H                        | -3.808530 | 3.050079  | 0.828331  | H                                           | -4.852084 | -0.642065 | 0.414824  |
| H                        | -3.250798 | -2.345561 | -1.358263 | H                                           | -2.949920 | 0.007272  | -1.922926 |
| H                        | -4.259494 | -2.680280 | 0.055479  | H                                           | -4.600076 | 1.189172  | 1.291026  |
| H                        | -2.863109 | 1.934355  | 1.796993  | H                                           | -4.104090 | 2.826994  | 0.847254  |
| H                        | -0.980209 | 0.786110  | 1.359870  | H                                           | -3.169631 | -2.549154 | -1.249456 |
| H                        | 0.234422  | -1.310078 | 1.586704  | H                                           | -4.092884 | -2.925711 | 0.211323  |
| H                        | -1.044034 | -1.727168 | -1.135177 | H                                           | -3.020564 | 1.820265  | 1.791544  |
| H                        | 1.328529  | 0.615072  | 3.143229  | H                                           | -1.057612 | 0.838236  | 1.304591  |
| H                        | 2.609087  | 1.818838  | 2.521780  | H                                           | 0.313354  | -1.141608 | 1.539562  |
| H                        | -1.457342 | 3.063306  | -0.040615 | H                                           | -1.015290 | -1.741665 | -1.126564 |
| H                        | -0.481225 | 0.562906  | -1.486178 | H                                           | 1.348123  | 0.907362  | 2.972891  |
| H                        | -1.723874 | 2.646041  | -1.728401 | H                                           | 2.484736  | 2.200226  | 2.256641  |
| H                        | -1.717252 | -1.501385 | 2.569010  | H                                           | -1.791406 | 3.019193  | -0.122743 |
| H                        | -3.294346 | -2.274653 | 2.351902  | H                                           | -0.676969 | 0.569240  | -1.555275 |
| H                        | -3.130123 | -0.538112 | 2.112655  | H                                           | -2.089146 | 2.544052  | -1.789626 |
| H                        | -5.714164 | -0.078503 | -1.857261 | H                                           | -3.097068 | -0.653283 | 2.168301  |
| H                        | 4.118763  | -2.600327 | -0.254505 | H                                           | -1.575613 | -1.451231 | 2.591327  |
| H                        | 2.992447  | -2.294933 | -1.597260 | H                                           | -3.068853 | -2.390372 | 2.457319  |
| H                        | 3.281539  | 0.167775  | -1.262928 | H                                           | -5.833062 | -0.519148 | -1.721980 |
| H                        | 5.115122  | 1.029794  | 0.153221  | H                                           | 3.531632  | -2.686134 | -0.982967 |
| H                        | 3.972501  | 0.135783  | 1.156294  | H                                           | 3.134140  | -1.122827 | -1.707978 |
| H                        | 5.504283  | -0.619155 | 0.694328  | H                                           | 5.008646  | -1.552293 | 0.669463  |
| H                        | 5.565543  | 0.291786  | -2.252126 |                                             |           |           |           |

|   |          |           |           |
|---|----------|-----------|-----------|
| H | 6.853756 | -1.020078 | -0.932382 |
| H | 5.978371 | -2.472752 | -1.440923 |
| H | 5.686736 | -0.925741 | -2.257487 |
| H | 5.653793 | 0.843450  | 0.314657  |
| H | 3.940160 | 0.696319  | 0.711894  |
| H | 4.434084 | 0.985133  | -0.959909 |

ωB97XD energy = -1154.82143750 a.u.

(2S,6R,7S,8R)-1, Conf. C

|   |           |           |           |
|---|-----------|-----------|-----------|
| C | -4.463625 | -0.284837 | 0.042448  |
| C | -3.478439 | 0.841968  | 0.287923  |
| C | -2.709605 | 1.476191  | -0.605920 |
| C | -2.841626 | 1.331223  | -2.099072 |
| C | -2.427964 | -1.752128 | 0.309529  |
| C | -3.741952 | -1.587541 | -0.409958 |
| C | -0.233595 | 1.497311  | -0.184390 |
| C | -0.074382 | 0.414572  | 0.920046  |
| C | -0.016554 | -1.034088 | 0.382343  |
| C | -1.299877 | -1.382076 | -0.306118 |
| O | 0.868905  | 2.413864  | -0.028686 |
| C | 1.704619  | 2.066858  | 0.973591  |
| C | 1.182891  | 0.836273  | 1.629524  |
| O | 2.697906  | 2.694905  | 1.237003  |
| C | 1.806579  | 0.262242  | 2.654456  |
| C | -1.537850 | 2.309668  | -0.135963 |
| C | -2.508990 | -2.101857 | 1.772083  |
| O | -5.444455 | -0.021512 | -0.953113 |
| O | 1.063260  | -1.102034 | -0.559431 |
| C | 2.141596  | -1.862501 | -0.258751 |
| O | 2.208546  | -2.571588 | 0.718378  |
| C | 3.223052  | -1.662164 | -1.286968 |
| C | 3.899823  | -0.279938 | -1.154889 |
| C | 4.640446  | -0.143664 | 0.176633  |
| C | 4.847713  | -0.051707 | -2.333735 |
| H | -4.969676 | -0.488869 | 0.997163  |
| H | -3.276962 | 1.034513  | 1.342159  |
| H | -2.986647 | 2.317109  | -2.556247 |
| H | -1.923675 | 0.919120  | -2.536230 |
| H | -3.574224 | -1.503105 | -1.487558 |
| H | -4.419112 | -2.432041 | -0.242324 |
| H | -3.681508 | 0.696842  | -2.381132 |
| H | -0.928836 | 0.458914  | 1.605026  |
| H | 0.206739  | -1.710684 | 1.210641  |
| H | -1.340558 | -1.116522 | -1.360643 |
| H | 1.439976  | -0.650041 | 3.114444  |
| H | 2.721152  | 0.701253  | 3.041717  |
| H | -1.690021 | 2.670070  | 0.887465  |
| H | -0.106014 | 1.050650  | -1.174438 |
| H | -1.399808 | 3.186264  | -0.777965 |
| H | -2.842886 | -1.237545 | 2.362999  |
| H | -1.553468 | -2.435248 | 2.183193  |
| H | -3.242446 | -2.897982 | 1.934664  |
| H | -5.890723 | 0.800664  | -0.729904 |
| H | 3.962341  | -2.457382 | -1.156238 |
| H | 2.775235  | -1.756304 | -2.281772 |
| H | 3.113401  | 0.484121  | -1.197207 |

|   |          |           |           |
|---|----------|-----------|-----------|
| H | 5.064912 | 0.858675  | 0.280355  |
| H | 3.977524 | -0.311352 | 1.029653  |
| H | 5.455464 | -0.874621 | 0.238307  |
| H | 5.326636 | 0.929031  | -2.256963 |
| H | 4.317685 | -0.096428 | -3.290837 |
| H | 5.638642 | -0.811022 | -2.348404 |

ωB97XD energy = -1154.82087318 a.u.

(2S,6R,7S,8R)-1, Conf. D

|   |           |           |           |
|---|-----------|-----------|-----------|
| C | -4.273503 | -0.565038 | -0.712397 |
| C | -3.284607 | 0.529133  | -0.999260 |
| C | -2.873667 | 1.498371  | -0.172146 |
| C | -3.524099 | 1.855608  | 1.139313  |
| C | -2.339338 | -1.770634 | 0.348797  |
| C | -3.520429 | -1.913648 | -0.580532 |
| C | -0.363034 | 1.367575  | -0.521319 |
| C | -0.089075 | 0.561642  | 0.779647  |
| C | 0.046816  | -0.969322 | 0.575181  |
| C | -1.129686 | -1.528223 | -0.166827 |
| O | 0.787043  | 2.207671  | -0.740115 |
| C | 1.665296  | 2.164795  | 0.284619  |
| C | 1.170755  | 1.195994  | 1.302795  |
| O | 2.674600  | 2.821957  | 0.302325  |
| C | 1.828642  | 0.966761  | 2.435871  |
| C | -1.605451 | 2.271775  | -0.491378 |
| C | -2.655640 | -1.706201 | 1.818908  |
| O | -5.213611 | -0.745222 | -1.763308 |
| O | 1.228927  | -1.218584 | -0.201470 |
| C | 2.283687  | -1.796362 | 0.417378  |
| O | 2.251014  | -2.179311 | 1.565314  |
| C | 3.491941  | -1.869002 | -0.477902 |
| C | 4.117398  | -0.480777 | -0.768939 |
| C | 5.614960  | -0.640517 | -1.042377 |
| C | 3.430480  | 0.228341  | -1.937980 |
| H | -4.804863 | -0.369364 | 0.227961  |
| H | -2.747816 | 0.389793  | -1.939452 |
| H | -3.755144 | 2.927101  | 1.151523  |
| H | -2.844390 | 1.678862  | 1.982065  |
| H | -3.189126 | -2.197914 | -1.584593 |
| H | -4.231199 | -2.672607 | -0.236404 |
| H | -4.450916 | 1.311679  | 1.329692  |
| H | -0.914266 | 0.697155  | 1.485125  |
| H | 0.181732  | -1.435449 | 1.554105  |
| H | -0.999859 | -1.580904 | -1.246103 |
| H | 1.487976  | 0.235438  | 3.161499  |
| H | 2.750156  | 1.503809  | 2.640101  |
| H | -1.438027 | 3.053268  | 0.258835  |
| H | -0.412811 | 0.700846  | -1.385181 |
| H | -1.679092 | 2.774598  | -1.461146 |
| H | -3.213321 | -0.792050 | 2.057609  |
| H | -1.763276 | -1.726967 | 2.448657  |
| H | -3.291890 | -2.549453 | 2.107577  |
| H | -5.662995 | 0.090826  | -1.917294 |
| H | 4.210206  | -2.507778 | 0.040331  |
| H | 3.219003  | -2.352418 | -1.423066 |
| H | 4.004131  | 0.141873  | 0.128050  |

|   |          |           |           |
|---|----------|-----------|-----------|
| H | 6.072258 | 0.329193  | -1.261130 |
| H | 6.134559 | -1.074736 | -0.182304 |
| H | 5.783727 | -1.294447 | -1.906697 |
| H | 3.828655 | 1.239491  | -2.060310 |
| H | 2.352160 | 0.310702  | -1.789862 |
| H | 3.601985 | -0.324256 | -2.870276 |

ωB97XD energy = -1154.82052521 a.u.

(2*S*,6*R*,7*S*,8*R*)-1, Conf. E

|   |           |           |           |
|---|-----------|-----------|-----------|
| C | -4.241983 | -0.594495 | -0.574869 |
| C | -3.258245 | 0.474015  | -0.960671 |
| C | -2.829501 | 1.499582  | -0.214589 |
| C | -3.449477 | 1.952436  | 1.082249  |
| C | -2.275138 | -1.737247 | 0.491048  |
| C | -3.491413 | -1.936745 | -0.380300 |
| C | -0.327202 | 1.346485  | -0.628564 |
| C | -0.031628 | 0.604148  | 0.704640  |
| C | 0.120339  | -0.930514 | 0.569739  |
| C | -1.085784 | -1.536361 | -0.085676 |
| O | 0.817494  | 2.177926  | -0.901384 |
| C | 1.687209  | 2.218088  | 0.132564  |
| C | 1.214889  | 1.286343  | 1.194584  |
| O | 2.675435  | 2.905929  | 0.122765  |
| C | 1.875747  | 1.120401  | 2.336890  |
| C | -1.570775 | 2.250729  | -0.615121 |
| C | -2.532090 | -1.559588 | 1.963496  |
| O | -5.214176 | -0.834991 | -1.584055 |
| O | 1.259577  | -1.220591 | -0.255884 |
| C | 2.319059  | -1.840816 | 0.313613  |
| O | 2.376759  | -2.106917 | 1.492755  |
| C | 3.392606  | -2.161934 | -0.696714 |
| C | 4.223732  | -0.947242 | -1.175849 |
| C | 3.466769  | -0.061421 | -2.167275 |
| C | 4.775684  | -0.139910 | 0.001019  |
| H | -4.744745 | -0.336245 | 0.366175  |
| H | -2.743060 | 0.267989  | -1.900559 |
| H | -4.358593 | 1.409204  | 1.346205  |
| H | -3.702437 | 3.016726  | 1.011141  |
| H | -3.199414 | -2.290555 | -1.374437 |
| H | -4.191581 | -2.666452 | 0.040509  |
| H | -2.740614 | 1.860903  | 1.914580  |
| H | -0.855893 | 0.758004  | 1.407415  |
| H | 0.308793  | -1.343654 | 1.563964  |
| H | -0.995582 | -1.663656 | -1.162669 |
| H | 1.549071  | 0.412585  | 3.091740  |
| H | 2.784958  | 1.685003  | 2.520821  |
| H | -1.382569 | 3.071332  | 0.086728  |
| H | -0.388412 | 0.641062  | -1.460091 |
| H | -1.672466 | 2.701773  | -1.607603 |
| H | -3.188235 | -2.353351 | 2.335167  |
| H | -3.043535 | -0.607949 | 2.155657  |
| H | -1.615870 | -1.572158 | 2.558532  |
| H | -5.664911 | -0.007733 | -1.776785 |
| H | 4.052588  | -2.883650 | -0.210036 |
| H | 2.923657  | -2.644537 | -1.560710 |
| H | 5.076214  | -1.385721 | -1.710613 |

|   |          |           |           |
|---|----------|-----------|-----------|
| H | 4.111040 | 0.748567  | -2.522010 |
| H | 3.132869 | -0.638350 | -3.036547 |
| H | 2.585036 | 0.395174  | -1.712636 |
| H | 5.463913 | 0.632925  | -0.352796 |
| H | 5.309822 | -0.781289 | 0.709484  |
| H | 3.972450 | 0.367500  | 0.544518  |

ωB97XD energy = -1154.82051509 a.u.

(2*S*,6*R*,7*S*,8*R*)-1, Conf. F

|   |           |           |           |
|---|-----------|-----------|-----------|
| C | -4.110870 | -1.469790 | -0.481310 |
| C | -3.464744 | -0.213636 | -0.994666 |
| C | -3.335379 | 0.961286  | -0.365406 |
| C | -4.057238 | 1.355670  | 0.897151  |
| C | -1.903066 | -1.914704 | 0.630816  |
| C | -3.013898 | -2.525626 | -0.188333 |
| C | -0.891397 | 1.439050  | -0.830169 |
| C | -0.402793 | 0.966215  | 0.567314  |
| C | 0.169517  | -0.473278 | 0.582147  |
| C | -0.810564 | -1.454937 | 0.012193  |
| O | -0.000191 | 2.490880  | -1.247114 |
| C | 0.861408  | 2.858094  | -0.274268 |
| C | 0.631516  | 1.998154  | 0.922090  |
| O | 1.667385  | 3.741175  | -0.418227 |
| C | 1.310713  | 2.161002  | 2.054008  |
| C | -2.329046 | 1.980256  | -0.875370 |
| C | -2.206648 | -1.669636 | 2.084583  |
| O | -4.981412 | -2.066812 | -1.433744 |
| O | 1.349090  | -0.477968 | -0.236787 |
| C | 2.544947  | -0.658419 | 0.366493  |
| O | 2.668888  | -0.925818 | 1.539588  |
| C | 3.672642  | -0.433121 | -0.608097 |
| C | 4.969638  | -1.157346 | -0.236102 |
| C | 4.805817  | -2.675221 | -0.350718 |
| C | 6.118161  | -0.659792 | -1.116200 |
| H | -4.661692 | -1.271439 | 0.447242  |
| H | -2.913101 | -0.363404 | -1.924486 |
| H | -4.590126 | 2.299275  | 0.732124  |
| H | -3.352071 | 1.541869  | 1.716692  |
| H | -2.633411 | -2.874359 | -1.153998 |
| H | -3.481491 | -3.379463 | 0.313731  |
| H | -4.784215 | 0.614888  | 1.234254  |
| H | -1.230780 | 0.976386  | 1.281939  |
| H | 0.462510  | -0.720612 | 1.605701  |
| H | -0.681845 | -1.658789 | -1.048913 |
| H | 1.161693  | 1.512124  | 2.911311  |
| H | 2.053793  | 2.949243  | 2.127826  |
| H | -2.370830 | 2.893035  | -0.269844 |
| H | -0.776689 | 0.643942  | -1.569581 |
| H | -2.546183 | 2.274625  | -1.907335 |
| H | -1.327245 | -1.365921 | 2.657213  |
| H | -2.614805 | -2.574624 | 2.546339  |
| H | -2.966256 | -0.885598 | 2.195369  |
| H | -5.644121 | -1.418535 | -1.689191 |
| H | 3.336405  | -0.710926 | -1.612972 |
| H | 3.831915  | 0.653784  | -0.627811 |
| H | 5.196010  | -0.915093 | 0.808685  |

|   |          |           |           |
|---|----------|-----------|-----------|
| H | 5.732343 | -3.187198 | -0.072521 |
| H | 4.011950 | -3.043045 | 0.305964  |
| H | 4.563050 | -2.960819 | -1.381767 |
| H | 7.053721 | -1.164764 | -0.856211 |
| H | 6.273591 | 0.417898  | -1.000992 |
| H | 5.915499 | -0.859467 | -2.175435 |

ωB97XD energy = -1154.82034764 a.u.

(2S,6R,7S,8R)-1, Conf. G

|   |           |           |           |
|---|-----------|-----------|-----------|
| C | -3.851378 | -1.513333 | -0.429089 |
| C | -3.141539 | -0.371375 | -1.100466 |
| C | -3.093487 | 0.908763  | -0.710713 |
| C | -3.972066 | 1.529397  | 0.344507  |
| C | -1.794897 | -1.676092 | 1.004554  |
| C | -2.803281 | -2.464592 | 0.204742  |
| C | -0.610428 | 1.331013  | -0.977822 |
| C | -0.281318 | 1.160972  | 0.531761  |
| C | 0.277711  | -0.234981 | 0.902163  |
| C | -0.634346 | -1.331338 | 0.437102  |
| O | 0.328633  | 2.287756  | -1.502342 |
| C | 1.077391  | 2.863538  | -0.536817 |
| C | 0.714732  | 2.260469  | 0.777817  |
| O | 1.895846  | 3.715265  | -0.770475 |
| C | 1.271068  | 2.661154  | 1.917551  |
| C | -2.029952 | 1.831873  | -1.283782 |
| C | -2.269459 | -1.145618 | 2.330669  |
| O | -4.595966 | -2.309149 | -1.342284 |
| O | 1.540088  | -0.385266 | 0.237153  |
| C | 2.657673  | -0.473978 | 0.992106  |
| O | 2.648567  | -0.476722 | 2.201478  |
| C | 3.887237  | -0.550629 | 0.124265  |
| C | 3.815303  | -1.619020 | -0.980213 |
| C | 5.095738  | -1.587202 | -1.816825 |
| C | 3.575900  | -3.010352 | -0.388685 |
| H | -4.515865 | -1.145299 | 0.363406  |
| H | -2.472686 | -0.692449 | -1.900869 |
| H | -3.378595 | 1.894611  | 1.191892  |
| H | -4.480147 | 2.405769  | -0.074293 |
| H | -2.313076 | -2.996624 | -0.617086 |
| H | -3.331962 | -3.204991 | 0.814527  |
| H | -4.735768 | 0.851647  | 0.729972  |
| H | -1.184014 | 1.301601  | 1.133383  |
| H | 0.453659  | -0.265723 | 1.980423  |
| H | -0.382601 | -1.747561 | -0.536442 |
| H | 1.030323  | 2.197720  | 2.869070  |
| H | 2.006775  | 3.459529  | 1.905785  |
| H | -2.135852 | 2.838383  | -0.862582 |
| H | -0.423433 | 0.402686  | -1.520897 |
| H | -2.128946 | 1.931677  | -2.369634 |
| H | -1.465572 | -0.704950 | 2.924857  |
| H | -2.724697 | -1.948232 | 2.920163  |
| H | -3.041088 | -0.378593 | 2.188158  |
| H | -5.216641 | -1.740102 | -1.806663 |
| H | 4.024571  | 0.439439  | -0.328306 |
| H | 4.736225  | -0.736715 | 0.788190  |
| H | 2.970432  | -1.368521 | -1.631975 |

|   |          |           |           |
|---|----------|-----------|-----------|
| H | 5.049574 | -2.324790 | -2.624074 |
| H | 5.254785 | -0.602293 | -2.267610 |
| H | 5.971261 | -1.822736 | -1.199922 |
| H | 3.545895 | -3.767743 | -1.178166 |
| H | 2.627507 | -3.061921 | 0.156594  |
| H | 4.378974 | -3.280918 | 0.306903  |

ωB97XD energy = -1154.82026763 a.u.

(2S,6R,7S,8R)-1, Conf. H

|   |           |           |           |
|---|-----------|-----------|-----------|
| C | -4.471658 | -0.590474 | 0.087456  |
| C | -3.608974 | 0.655782  | 0.129366  |
| C | -2.889052 | 1.193839  | -0.862955 |
| C | -2.982696 | 0.778429  | -2.307499 |
| C | -2.303870 | -1.775143 | 0.605408  |
| C | -3.615637 | -1.871891 | -0.130735 |
| C | -0.427162 | 1.554949  | -0.462182 |
| C | -0.160697 | 0.696349  | 0.806089  |
| C | 0.025934  | -0.813870 | 0.540059  |
| C | -1.212224 | -1.395811 | -0.067507 |
| O | 0.552328  | 2.612904  | -0.459027 |
| C | 1.413974  | 2.530892  | 0.576871  |
| C | 1.049690  | 1.352822  | 1.412687  |
| O | 2.313247  | 3.315304  | 0.737520  |
| C | 1.756870  | 1.003035  | 2.483509  |
| C | -1.815802 | 2.211197  | -0.547410 |
| C | -2.372525 | -1.886521 | 2.105239  |
| O | -5.456990 | -0.606279 | -0.938184 |
| O | 1.118098  | -0.976926 | -0.379924 |
| C | 2.222759  | -1.626408 | 0.046542  |
| O | 2.350204  | -2.069806 | 1.165392  |
| C | 3.264070  | -1.725525 | -1.038648 |
| C | 4.589974  | -1.053444 | -0.638585 |
| C | 5.646337  | -1.309884 | -1.714850 |
| C | 4.400753  | 0.445644  | -0.398231 |
| H | -4.970639 | -0.676626 | 1.063511  |
| H | -3.446339 | 1.052585  | 1.131902  |
| H | -3.745276 | 0.017074  | -2.470155 |
| H | -2.019669 | 0.401225  | -2.673287 |
| H | -3.438979 | -1.961397 | -1.206382 |
| H | -4.206958 | -2.739008 | 0.182993  |
| H | -3.229577 | 1.649081  | -2.926628 |
| H | -1.015129 | 0.780780  | 1.487962  |
| H | 0.295431  | -1.301661 | 1.479411  |
| H | -1.269282 | -1.310854 | -1.150942 |
| H | 1.515073  | 0.125764  | 3.075002  |
| H | 2.620392  | 1.595096  | 2.772168  |
| H | -2.017959 | 2.719942  | 0.401725  |
| H | -0.228869 | 0.971331  | -1.365707 |
| H | -1.763102 | 2.977829  | -1.327979 |
| H | -1.391911 | -2.018535 | 2.567840  |
| H | -2.829446 | -0.988065 | 2.542633  |
| H | -3.000329 | -2.734446 | 2.397280  |
| H | -5.986180 | 0.193244  | -0.863594 |
| H | 3.433638  | -2.793378 | -1.216242 |
| H | 2.876220  | -1.282807 | -1.960969 |
| H | 4.923018  | -1.518607 | 0.297052  |



|   |          |           |           |
|---|----------|-----------|-----------|
| H | 6.604210 | -0.863609 | -1.430419 |
| H | 5.806888 | -2.381176 | -1.874976 |
| H | 5.343715 | -0.865555 | -2.670691 |
| H | 5.351108 | 0.923035  | -0.141870 |
| H | 3.704352 | 0.642547  | 0.421562  |
| H | 4.010111 | 0.940786  | -1.295151 |

ωB97XD energy = -1154.82004927 a.u.

(2*S*,6*R*,7*S*,8*R*)-1, Conf. I

|   |           |           |           |
|---|-----------|-----------|-----------|
| C | -4.297965 | -0.909609 | -0.433088 |
| C | -3.459608 | 0.261239  | -0.864590 |
| C | -3.095813 | 1.324400  | -0.136550 |
| C | -3.677732 | 1.702553  | 1.201003  |
| C | -2.152466 | -1.841400 | 0.486355  |
| C | -3.396907 | -2.165164 | -0.304076 |
| C | -0.627616 | 1.429279  | -0.717538 |
| C | -0.165122 | 0.719171  | 0.584224  |
| C | 0.145785  | -0.785829 | 0.410665  |
| C | -1.031637 | -1.517166 | -0.166127 |
| O | 0.410319  | 2.363572  | -1.069826 |
| C | 1.343024  | 2.490640  | -0.100739 |
| C | 1.034635  | 1.525996  | 0.993842  |
| O | 2.255762  | 3.272183  | -0.174912 |
| C | 1.773331  | 1.444720  | 2.096904  |
| C | -1.949747 | 2.205678  | -0.606433 |
| C | -2.325593 | -1.699706 | 1.974613  |
| O | -5.298959 | -1.246568 | -1.384917 |
| O | 1.244733  | -0.911866 | -0.505097 |
| C | 2.349659  | -1.571048 | -0.087405 |
| O | 2.473517  | -2.016605 | 1.031187  |
| C | 3.374310  | -1.678121 | -1.189297 |
| C | 4.684338  | -0.910919 | -0.901317 |
| C | 4.419095  | 0.575045  | -0.653435 |
| C | 5.495958  | -1.532834 | 0.237415  |
| H | -4.767123 | -0.714345 | 0.539961  |
| H | -2.984338 | 0.114210  | -1.836129 |
| H | -4.498069 | 1.056787  | 1.518776  |
| H | -4.057649 | 2.729903  | 1.155501  |
| H | -3.137444 | -2.480463 | -1.319905 |
| H | -3.984491 | -2.967721 | 0.154479  |
| H | -2.910684 | 1.692748  | 1.985099  |
| H | -0.949786 | 0.777371  | 1.344091  |
| H | 0.459099  | -1.190102 | 1.376655  |
| H | -1.003061 | -1.631791 | -1.248010 |
| H | 1.559359  | 0.723559  | 2.879668  |
| H | 2.627575  | 2.103561  | 2.222019  |
| H | -1.799201 | 3.034099  | 0.095412  |
| H | -0.684122 | 0.720172  | -1.545572 |
| H | -2.161452 | 2.653812  | -1.582673 |
| H | -2.940305 | -0.822550 | 2.213299  |
| H | -1.375524 | -1.596255 | 2.503881  |
| H | -2.845394 | -2.572792 | 2.382561  |
| H | -5.847795 | -0.471952 | -1.537990 |
| H | 3.595665  | -2.743856 | -1.312050 |
| H | 2.929127  | -1.310498 | -2.116884 |
| H | 5.273723  | -1.001486 | -1.822946 |

|   |          |           |           |
|---|----------|-----------|-----------|
| H | 5.359246 | 1.129256  | -0.577428 |
| H | 3.828283 | 1.026128  | -1.456522 |
| H | 3.875275 | 0.725571  | 0.285403  |
| H | 6.454721 | -1.015092 | 0.344348  |
| H | 5.701191 | -2.591684 | 0.048334  |
| H | 4.960627 | -1.463887 | 1.188583  |

ωB97XD energy = -1154.81987696 a.u.

(2*S*,6*R*,7*S*,8*R*)-1, Conf. J

|   |           |           |           |
|---|-----------|-----------|-----------|
| C | -4.477702 | -0.704980 | 0.164036  |
| C | -3.660897 | 0.572720  | 0.176018  |
| C | -2.987738 | 1.130044  | -0.838309 |
| C | -3.103183 | 0.699209  | -2.276857 |
| C | -2.253375 | -1.802800 | 0.627915  |
| C | -3.580941 | -1.955763 | -0.068901 |
| C | -0.533277 | 1.586477  | -0.507503 |
| C | -0.201635 | 0.748693  | 0.759989  |
| C | 0.031954  | -0.755699 | 0.497986  |
| C | -1.195087 | -1.389571 | -0.077807 |
| O | 0.409698  | 2.676603  | -0.541082 |
| C | 1.312300  | 2.624576  | 0.462005  |
| C | 1.008460  | 1.445732  | 1.320294  |
| O | 2.195837  | 3.433398  | 0.582982  |
| C | 1.758756  | 1.126890  | 2.371271  |
| C | -1.946495 | 2.190672  | -0.559165 |
| C | -2.276580 | -1.901064 | 2.130396  |
| O | -5.488438 | -0.764577 | -0.834951 |
| O | 1.115548  | -0.868142 | -0.438835 |
| C | 2.244952  | -1.488629 | -0.036249 |
| O | 2.379316  | -1.994085 | 1.054817  |
| C | 3.293967  | -1.477999 | -1.119849 |
| C | 4.702101  | -1.198215 | -0.575944 |
| C | 5.740576  | -1.389079 | -1.683010 |
| C | 4.790754  | 0.206881  | 0.024979  |
| H | -4.947856 | -0.802708 | 1.153291  |
| H | -3.487975 | 0.982806  | 1.171453  |
| H | -3.848936 | -0.083283 | -2.415200 |
| H | -2.139315 | 0.343325  | -2.661404 |
| H | -3.432037 | -2.049116 | -1.148416 |
| H | -4.129152 | -2.841506 | 0.269721  |
| H | -3.386508 | 1.557113  | -2.898075 |
| H | -1.036137 | 0.812250  | 1.468280  |
| H | 0.338327  | -1.229255 | 1.433123  |
| H | -1.282592 | -1.317574 | -1.159966 |
| H | 1.558686  | 0.250113  | 2.979175  |
| H | 2.612896  | 1.746654  | 2.627661  |
| H | -2.142489 | 2.699083  | 0.391377  |
| H | -0.340558 | 1.001228  | -1.411219 |
| H | -1.944451 | 2.951873  | -1.346665 |
| H | -1.280938 | -2.009247 | 2.566482  |
| H | -2.739083 | -1.007930 | 2.572966  |
| H | -2.877788 | -2.758974 | 2.447963  |
| H | -6.046644 | 0.013858  | -0.749446 |
| H | 3.265503  | -2.468475 | -1.591288 |
| H | 3.017090  | -0.745428 | -1.884309 |
| H | 4.896106  | -1.928769 | 0.218002  |

|   |          |           |           |
|---|----------|-----------|-----------|
| H | 6.751620 | -1.229182 | -1.295839 |
| H | 5.697007 | -2.397828 | -2.107174 |
| H | 5.579062 | -0.672203 | -2.497075 |
| H | 5.790249 | 0.394058  | 0.429302  |
| H | 4.072527 | 0.342867  | 0.839181  |
| H | 4.586259 | 0.972107  | -0.733120 |

ωB97XD energy = -1154.81979242 a.u.

(2S,6R,7S,8R)-1, Conf. K

|   |           |           |           |
|---|-----------|-----------|-----------|
| C | -4.396864 | -0.320820 | 0.136132  |
| C | -3.419551 | 0.820171  | 0.340938  |
| C | -2.664455 | 1.436579  | -0.576690 |
| C | -2.808164 | 1.254403  | -2.064596 |
| C | -2.334966 | -1.753053 | 0.415199  |
| C | -3.666117 | -1.630471 | -0.281228 |
| C | -0.171221 | 1.534442  | -0.192562 |
| C | 0.038909  | 0.457596  | 0.909524  |
| C | 0.072155  | -1.002266 | 0.404292  |
| C | -1.230012 | -1.372270 | -0.234377 |
| O | 0.883602  | 2.504644  | -0.029514 |
| C | 1.753809  | 2.177114  | 0.950408  |
| C | 1.317621  | 0.896433  | 1.571150  |
| O | 2.713297  | 2.853369  | 1.218349  |
| C | 2.027153  | 0.300074  | 2.525202  |
| C | -1.503627 | 2.300020  | -0.138404 |
| C | -2.379819 | -2.074497 | 1.885138  |
| O | -5.385463 | -0.096511 | -0.861326 |
| O | 1.116071  | -1.126350 | -0.575257 |
| C | 2.178881  | -1.909570 | -0.283866 |
| O | 2.300552  | -2.505108 | 0.762749  |
| C | 3.175657  | -1.938132 | -1.415247 |
| C | 4.077256  | -0.682351 | -1.501936 |
| C | 3.336507  | 0.550110  | -2.024759 |
| C | 4.775305  | -0.391277 | -0.171605 |
| H | -4.895928 | -0.499775 | 1.099483  |
| H | -3.207546 | 1.040195  | 1.387731  |
| H | -3.637270 | 0.596700  | -2.324097 |
| H | -1.885796 | 0.851769  | -2.501245 |
| H | -3.521344 | -1.583578 | -1.364433 |
| H | -4.327346 | -2.477612 | -0.069305 |
| H | -2.977567 | 2.226698  | -2.542073 |
| H | -0.788311 | 0.510886  | 1.627838  |
| H | 0.317837  | -1.652882 | 1.246592  |
| H | -1.302615 | -1.128861 | -1.292457 |
| H | 1.736911  | -0.654302 | 2.952267  |
| H | 2.942690  | 0.763714  | 2.880294  |
| H | -1.648548 | 2.670508  | 0.882466  |
| H | -0.023663 | 1.094980  | -1.184187 |
| H | -1.399785 | 3.172357  | -0.792868 |
| H | -3.051673 | -2.918464 | 2.071654  |
| H | -2.774285 | -1.223147 | 2.456834  |
| H | -1.400150 | -2.324663 | 2.297977  |
| H | -5.838714 | 0.727421  | -0.659802 |
| H | 3.798710  | -2.819719 | -1.247900 |
| H | 2.635882  | -2.063494 | -2.359276 |
| H | 4.848048  | -0.941679 | -2.238961 |

|   |          |           |           |
|---|----------|-----------|-----------|
| H | 4.031517 | 1.385564  | -2.150966 |
| H | 2.861204 | 0.351015  | -2.991068 |
| H | 2.557940 | 0.874697  | -1.330614 |
| H | 5.510363 | 0.410014  | -0.291018 |
| H | 5.288631 | -1.277431 | 0.214693  |
| H | 4.055585 | -0.064678 | 0.586167  |

ωB97XD energy = -1154.81971422 a.u.

(2S,6R,7S,8R)-1, Conf. L

|   |           |           |           |
|---|-----------|-----------|-----------|
| C | -4.339768 | -0.972119 | -0.384430 |
| C | -3.535346 | 0.221373  | -0.818022 |
| C | -3.174308 | 1.281614  | -0.084263 |
| C | -3.731156 | 1.631480  | 1.271293  |
| C | -2.152879 | -1.873917 | 0.465552  |
| C | -3.410137 | -2.210661 | -0.298798 |
| C | -0.729124 | 1.428109  | -0.727245 |
| C | -0.212583 | 0.722142  | 0.556958  |
| C | 0.120722  | -0.777343 | 0.355172  |
| C | -1.051746 | -1.524874 | -0.207969 |
| O | 0.287703  | 2.369318  | -1.120197 |
| C | 1.270365  | 2.485010  | -0.201521 |
| C | 0.998540  | 1.537284  | 0.916940  |
| O | 2.195303  | 3.245574  | -0.331491 |
| C | 1.780725  | 1.467649  | 1.990252  |
| C | -2.054930 | 2.188217  | -0.570374 |
| C | -2.295404 | -1.751057 | 1.958876  |
| O | -5.357203 | -1.314793 | -1.316596 |
| O | 1.202994  | -0.847337 | -0.584867 |
| C | 2.394323  | -1.325611 | -0.158253 |
| O | 2.570002  | -1.771537 | 0.952538  |
| C | 3.425463  | -1.227718 | -1.256594 |
| C | 4.839487  | -0.834974 | -0.787496 |
| C | 4.824172  | 0.462427  | 0.026252  |
| C | 5.552041  | -1.962150 | -0.034818 |
| H | -4.788748 | -0.801142 | 0.602631  |
| H | -3.080340 | 0.096106  | -1.802209 |
| H | -4.531018 | 0.965604  | 1.599620  |
| H | -4.132010 | 2.651596  | 1.248354  |
| H | -3.170181 | -2.503384 | -1.326094 |
| H | -3.969062 | -3.032841 | 0.160914  |
| H | -2.945722 | 1.626862  | 2.037010  |
| H | -0.968557 | 0.767654  | 1.346003  |
| H | 0.466188  | -1.191649 | 1.305978  |
| H | -1.044394 | -1.628936 | -1.291185 |
| H | 1.598733  | 0.754811  | 2.788521  |
| H | 2.641677  | 2.124489  | 2.070883  |
| H | -1.897406 | 3.008914  | 0.138966  |
| H | -0.808857 | 0.717446  | -1.551920 |
| H | -2.298590 | 2.645689  | -1.534765 |
| H | -2.789244 | -2.638467 | 2.368271  |
| H | -2.921847 | -0.889149 | 2.221014  |
| H | -1.336516 | -1.634442 | 2.469023  |
| H | -5.925355 | -0.549408 | -1.443462 |
| H | 3.456283  | -2.208085 | -1.749244 |
| H | 3.059674  | -0.510230 | -1.995863 |
| H | 5.400150  | -0.644031 | -1.711877 |

|   |          |           |           |
|---|----------|-----------|-----------|
| H | 5.845440 | 0.803781  | 0.221911  |
| H | 4.294544 | 1.267326  | -0.494516 |
| H | 4.335201 | 0.303985  | 0.993230  |
| H | 6.584684 | -1.675422 | 0.189783  |
| H | 5.581742 | -2.880841 | -0.631156 |
| H | 5.042403 | -2.185319 | 0.906000  |

ωB97XD energy = -1154.81962221 a.u.

(2S,6R,7S,8R)-1, Conf. M

|   |           |           |           |
|---|-----------|-----------|-----------|
| C | -4.428034 | -0.602589 | 0.223792  |
| C | -3.559829 | 0.635978  | 0.330780  |
| C | -2.898666 | 1.267388  | -0.647326 |
| C | -3.077870 | 0.988420  | -2.116342 |
| C | -2.235284 | -1.821421 | 0.510740  |
| C | -3.587731 | -1.856736 | -0.154440 |
| C | -0.414222 | 1.608315  | -0.361285 |
| C | -0.068413 | 0.636313  | 0.801660  |
| C | 0.088742  | -0.843675 | 0.391187  |
| C | -1.187953 | -1.369618 | -0.187062 |
| O | 0.555735  | 2.674103  | -0.311310 |
| C | 1.480012  | 2.500718  | 0.656889  |
| C | 1.184599  | 1.233508  | 1.382385  |
| O | 2.378029  | 3.280523  | 0.844673  |
| C | 1.980608  | 0.770633  | 2.342286  |
| C | -1.808063 | 2.256045  | -0.301719 |
| C | -2.215795 | -2.077467 | 1.993771  |
| O | -5.465955 | -0.528068 | -0.745865 |
| O | 1.119594  | -0.930204 | -0.606163 |
| C | 2.217970  | -1.667613 | -0.327453 |
| O | 2.391147  | -2.231175 | 0.730034  |
| C | 3.174450  | -1.691000 | -1.493106 |
| C | 4.446359  | -0.839326 | -1.271442 |
| C | 4.108557  | 0.631069  | -1.016892 |
| C | 5.344534  | -1.400929 | -0.167202 |
| H | -4.876203 | -0.775521 | 1.212924  |
| H | -3.333647 | 0.932671  | 1.355470  |
| H | -3.360177 | 1.911237  | -2.636636 |
| H | -3.847585 | 0.240246  | -2.304360 |
| H | -3.471732 | -1.847252 | -1.242195 |
| H | -4.161023 | -2.751202 | 0.112363  |
| H | -2.137325 | 0.652430  | -2.570215 |
| H | -0.874553 | 0.660843  | 1.544623  |
| H | 0.412010  | -1.412773 | 1.265589  |
| H | -1.312707 | -1.182678 | -1.251839 |
| H | 1.793512  | -0.172887 | 2.844948  |
| H | 2.863455  | 1.336720  | 2.624639  |
| H | -1.954141 | 2.674749  | 0.700219  |
| H | -0.265492 | 1.114476  | -1.326053 |
| H | -1.803896 | 3.092021  | -1.009748 |
| H | -2.677382 | -1.241932 | 2.537908  |
| H | -1.207842 | -2.215948 | 2.390947  |
| H | -2.798538 | -2.972487 | 2.234618  |
| H | -5.991455 | 0.257625  | -0.568637 |
| H | 3.461722  | -2.736098 | -1.645876 |
| H | 2.651319  | -1.339436 | -2.385707 |
| H | 4.996500  | -0.903369 | -2.219108 |

|   |          |           |           |
|---|----------|-----------|-----------|
| H | 5.015021 | 1.243406  | -1.018293 |
| H | 3.429078 | 1.031253  | -1.776482 |
| H | 3.633176 | 0.761000  | -0.039546 |
| H | 6.274666 | -0.826780 | -0.107869 |
| H | 5.601180 | -2.448369 | -0.355326 |
| H | 4.849838 | -1.351461 | 0.807362  |

ωB97XD energy = -1154.81899938 a.u.

(2S,6R,7S,8R)-1, Conf. N

|   |           |           |           |
|---|-----------|-----------|-----------|
| C | -3.691348 | -1.784276 | -0.269752 |
| C | -3.199825 | -0.516373 | -0.909813 |
| C | -3.226398 | 0.723127  | -0.403919 |
| C | -4.004004 | 1.147861  | 0.815002  |
| C | -1.460849 | -1.831952 | 0.888772  |
| C | -2.475944 | -2.657344 | 0.136178  |
| C | -0.856870 | 1.455840  | -0.925131 |
| C | -0.321697 | 1.199229  | 0.510965  |
| C | 0.417127  | -0.149863 | 0.681427  |
| C | -0.430917 | -1.299407 | 0.223000  |
| O | -0.105357 | 2.563140  | -1.455883 |
| C | 0.692741  | 3.140722  | -0.531383 |
| C | 0.575282  | 2.382569  | 0.747485  |
| O | 1.368640  | 4.107907  | -0.770096 |
| C | 1.227003  | 2.745721  | 1.848555  |
| C | -2.350783 | 1.804147  | -1.016106 |
| C | -1.805348 | -1.490107 | 2.313471  |
| O | -4.464372 | -2.582927 | -1.156015 |
| O | 1.597564  | -0.106070 | -0.133101 |
| C | 2.798498  | -0.218757 | 0.476536  |
| O | 2.930296  | -0.347066 | 1.672969  |
| C | 3.921128  | -0.199908 | -0.526942 |
| C | 4.364576  | -1.621591 | -0.950023 |
| C | 4.999623  | -2.396215 | 0.207140  |
| C | 3.221767  | -2.415207 | -1.589784 |
| H | -4.277371 | -1.561600 | 0.631465  |
| H | -2.622696 | -0.689554 | -1.819941 |
| H | -4.634644 | 0.358443  | 1.227515  |
| H | -4.651334 | 1.994248  | 0.557395  |
| H | -2.041155 | -3.054922 | -0.786718 |
| H | -2.841615 | -3.505609 | 0.724742  |
| H | -3.335104 | 1.502656  | 1.608819  |
| H | -1.149444 | 1.184516  | 1.225942  |
| H | 0.726302  | -0.246633 | 1.725164  |
| H | -0.271408 | -1.589113 | -0.813973 |
| H | 1.160150  | 2.177178  | 2.770896  |
| H | 1.861983  | 3.626462  | 1.831921  |
| H | -2.510487 | 2.759346  | -0.502745 |
| H | -0.637151 | 0.608427  | -1.577493 |
| H | -2.594607 | 1.967656  | -2.070903 |
| H | -2.085777 | -2.394226 | 2.863898  |
| H | -2.667968 | -0.813059 | 2.352724  |
| H | -0.980540 | -1.012437 | 2.847193  |
| H | -5.201689 | -2.055946 | -1.477514 |
| H | 3.600173  | 0.361815  | -1.408075 |
| H | 4.763480  | 0.319477  | -0.062658 |
| H | 5.135508  | -1.465496 | -1.715395 |

|   |          |           |           |
|---|----------|-----------|-----------|
| H | 5.376223 | -3.362242 | -0.144362 |
| H | 5.836846 | -1.843831 | 0.644913  |
| H | 4.274289 | -2.583911 | 1.005164  |
| H | 3.595818 | -3.360737 | -1.994664 |
| H | 2.751237 | -1.856869 | -2.405289 |
| H | 2.444232 | -2.653199 | -0.855095 |

ωB97XD energy = -1154.81894311 a.u.

(2R,6R,7S,8R)-1, Conf. A

|   |           |           |           |
|---|-----------|-----------|-----------|
| C | 4.450234  | -0.177111 | 0.439014  |
| C | 3.474599  | 0.907833  | 0.051391  |
| C | 2.643019  | 1.575627  | 0.857170  |
| C | 2.676001  | 1.479482  | 2.359621  |
| C | 2.471948  | -1.689155 | -0.064737 |
| C | 3.718563  | -1.512892 | 0.766453  |
| C | 0.201334  | 1.530160  | 0.255544  |
| C | 0.123550  | 0.442171  | -0.852080 |
| C | 0.057109  | -1.004966 | -0.313767 |
| C | 1.296258  | -1.328929 | 0.462804  |
| O | -0.906333 | 2.426606  | 0.035748  |
| C | -1.676440 | 2.064947  | -1.012944 |
| C | -1.095775 | 0.843569  | -1.636169 |
| O | -2.663522 | 2.675926  | -1.333557 |
| C | -1.648723 | 0.260609  | -2.696101 |
| C | 1.492178  | 2.364932  | 0.274961  |
| C | 2.677462  | -2.053447 | -1.509673 |
| O | 5.352270  | -0.448061 | -0.629093 |
| O | -1.081813 | -1.091729 | 0.555580  |
| C | -2.119564 | -1.879591 | 0.191092  |
| O | -2.112130 | -2.585290 | -0.790681 |
| C | -3.261762 | -1.718407 | 1.159306  |
| C | -3.954096 | -0.344966 | 1.022722  |
| C | -4.614112 | -0.184700 | -0.348045 |
| C | -4.976629 | -0.166108 | 2.146481  |
| H | 5.024427  | 0.109374  | 1.331487  |
| H | 3.350855  | 1.021374  | -1.026301 |
| H | 3.546936  | 0.934932  | 2.729908  |
| H | 1.782071  | 0.972396  | 2.743713  |
| H | 3.448788  | -1.495845 | 1.827256  |
| H | 4.443063  | -2.319707 | 0.614093  |
| H | 2.685411  | 2.479862  | 2.805940  |
| H | 1.017798  | 0.495627  | -1.483542 |
| H | -0.098183 | -1.688601 | -1.151228 |
| H | 1.253732  | -1.059456 | 1.516875  |
| H | -1.241136 | -0.644901 | -3.134361 |
| H | -2.546286 | 0.685420  | -3.135611 |
| H | 1.714870  | 2.693273  | -0.746389 |
| H | 0.027319  | 1.084332  | 1.239007  |
| H | 1.291860  | 3.261047  | 0.872354  |
| H | 3.189837  | -1.242832 | -2.041698 |
| H | 1.742992  | -2.276999 | -2.028923 |
| H | 3.330905  | -2.927919 | -1.588248 |
| H | 5.830778  | 0.358888  | -0.840999 |
| H | -3.978147 | -2.522119 | 0.967675  |
| H | -2.869323 | -1.830710 | 2.175557  |

|   |           |           |           |
|---|-----------|-----------|-----------|
| H | -3.185222 | 0.430261  | 1.133098  |
| H | -5.057224 | 0.809807  | -0.448736 |
| H | -3.894789 | -0.308406 | -1.162037 |
| H | -5.404504 | -0.932720 | -0.482904 |
| H | -5.465000 | 0.809994  | 2.070221  |
| H | -4.505432 | -0.234094 | 3.132585  |
| H | -5.755096 | -0.936243 | 2.088975  |

ωB97XD energy = -1154.82278394 a.u.

(2R,6R,7S,8R)-1, Conf. B

|   |           |           |           |
|---|-----------|-----------|-----------|
| C | -4.467888 | -0.565907 | -0.394324 |
| C | -3.610691 | 0.657225  | -0.175562 |
| C | -2.840088 | 1.276638  | -1.075057 |
| C | -2.847888 | 0.959508  | -2.547138 |
| C | -2.348933 | -1.777112 | 0.317866  |
| C | -3.601577 | -1.855003 | -0.519623 |
| C | -0.405307 | 1.595196  | -0.493908 |
| C | -0.207524 | 0.684544  | 0.750423  |
| C | -0.016012 | -0.814330 | 0.432682  |
| C | -1.218754 | -1.365482 | -0.267766 |
| O | 0.576038  | 2.646933  | -0.399132 |
| C | 1.387639  | 2.514605  | 0.671755  |
| C | 0.976236  | 1.307282  | 1.440434  |
| O | 2.284050  | 3.283742  | 0.905860  |
| C | 1.630821  | 0.908110  | 2.527409  |
| C | -1.785505 | 2.260608  | -0.623341 |
| C | -2.522599 | -1.964257 | 1.799755  |
| O | -5.351503 | -0.764708 | 0.704671  |
| O | 1.124646  | -0.946007 | -0.433687 |
| C | 2.203524  | -1.615144 | 0.025380  |
| O | 2.271656  | -2.101475 | 1.131469  |
| C | 3.300414  | -1.679929 | -1.006814 |
| C | 4.618391  | -1.071727 | -0.494891 |
| C | 5.733732  | -1.316963 | -1.512616 |
| C | 4.458619  | 0.421049  | -0.199754 |
| H | -5.055912 | -0.475284 | -1.318362 |
| H | -3.510044 | 0.938596  | 0.873403  |
| H | -3.641561 | 0.264007  | -2.827366 |
| H | -1.894815 | 0.516196  | -2.861613 |
| H | -3.327452 | -1.972955 | -1.572765 |
| H | -4.240927 | -2.698848 | -0.239875 |
| H | -2.975419 | 1.877358  | -3.131554 |
| H | -1.094213 | 0.747321  | 1.392142  |
| H | 0.200191  | -1.342305 | 1.363620  |
| H | -1.207441 | -1.234969 | -1.348712 |
| H | 1.357254  | 0.008673  | 3.069602  |
| H | 2.483537  | 1.481054  | 2.879577  |
| H | -2.050434 | 2.708053  | 0.341028  |
| H | -0.163842 | 1.046514  | -1.409137 |
| H | -1.682835 | 3.076594  | -1.347172 |
| H | -3.166622 | -1.178328 | 2.211821  |
| H | -1.575627 | -1.964406 | 2.343736  |
| H | -3.032510 | -2.911851 | 2.000934  |
| H | -5.910321 | 0.012774  | 0.795812  |
| H | 3.451969  | -2.740646 | -1.237114 |
| H | 2.976925  | -1.174854 | -1.921761 |

|   |          |           |           |
|---|----------|-----------|-----------|
| H | 4.874870 | -1.587439 | 0.438197  |
| H | 6.682431 | -0.907985 | -1.151275 |
| H | 5.877532 | -2.385802 | -1.702479 |
| H | 5.504374 | -0.830211 | -2.468179 |
| H | 5.399386 | 0.852264  | 0.155340  |
| H | 3.703874 | 0.605701  | 0.569973  |
| H | 4.158886 | 0.969431  | -1.100731 |

ωB97XD energy = -1154.82191462 a.u.

(2R,6R,7S,8R)-1, Conf. C

|   |           |           |           |
|---|-----------|-----------|-----------|
| C | 4.478949  | -0.685358 | 0.324674  |
| C | 3.665190  | 0.571362  | 0.131129  |
| C | 2.940942  | 1.216379  | 1.050921  |
| C | 2.972974  | 0.892562  | 2.521243  |
| C | 2.298291  | -1.811880 | -0.334324 |
| C | 3.565844  | -1.938817 | 0.473875  |
| C | 0.507612  | 1.626968  | 0.528915  |
| C | 0.244424  | 0.733709  | -0.715976 |
| C | 0.005556  | -0.758836 | -0.400013 |
| C | 1.197853  | -1.358624 | 0.276848  |
| O | -0.438695 | 2.712398  | 0.468055  |
| C | -1.290872 | 2.611189  | -0.574642 |
| C | -0.939358 | 1.398908  | -1.365779 |
| O | -2.171256 | 3.408216  | -0.772638 |
| C | -1.636674 | 1.031830  | -2.437382 |
| C | 1.913601  | 2.241473  | 0.628314  |
| C | 2.431496  | -2.001394 | -1.820228 |
| O | 5.322020  | -0.917319 | -0.799439 |
| O | -1.128398 | -0.839436 | 0.480521  |
| C | -2.232250 | -1.480048 | 0.041742  |
| O | -2.311230 | -2.016573 | -1.039841 |
| C | -3.331088 | -1.451268 | 1.074444  |
| C | -4.716087 | -1.205171 | 0.459992  |
| C | -5.800469 | -1.384620 | 1.524187  |
| C | -4.795327 | 0.183949  | -0.178236 |
| H | 5.096974  | -0.620542 | 1.231233  |
| H | 3.550044  | 0.860700  | -0.914163 |
| H | 2.012513  | 0.482707  | 2.857971  |
| H | 3.148679  | 1.802256  | 3.105920  |
| H | 3.312173  | -2.044003 | 1.533462  |
| H | 4.164085  | -2.808146 | 0.181329  |
| H | 3.747518  | 0.167431  | 2.778957  |
| H | 1.113840  | 0.770671  | -1.383033 |
| H | -0.246155 | -1.276964 | -1.327600 |
| H | 1.214503  | -1.231109 | 1.358125  |
| H | -1.404979 | 0.131447  | -2.997579 |
| H | -2.479822 | 1.635754  | -2.759638 |
| H | 2.172299  | 2.683991  | -0.339946 |
| H | 0.271036  | 1.079161  | 1.445964  |
| H | 1.857857  | 3.056637  | 1.358076  |
| H | 3.085012  | -1.231397 | -2.247234 |
| H | 1.472249  | -1.977016 | -2.341601 |
| H | 2.913039  | -2.960854 | -2.034239 |
| H | 5.910119  | -0.163591 | -0.904799 |
| H | -3.312805 | -2.428163 | 1.574135  |
| H | -3.098488 | -0.694769 | 1.830405  |

|   |           |           |           |
|---|-----------|-----------|-----------|
| H | -4.863872 | -1.957162 | -0.323875 |
| H | -6.795253 | -1.244818 | 1.089877  |
| H | -5.764613 | -2.383653 | 1.971382  |
| H | -5.682743 | -0.648824 | 2.328879  |
| H | -5.777905 | 0.347842  | -0.631311 |
| H | -4.042724 | 0.311085  | -0.962428 |
| H | -4.635738 | 0.969161  | 0.570245  |

ωB97XD energy = -1154.82174371 a.u.

(2R,6R,7S,8R)-1, Conf. D

|   |           |           |           |
|---|-----------|-----------|-----------|
| C | 4.392587  | -0.208397 | 0.344034  |
| C | 3.417932  | 0.887245  | -0.014698 |
| C | 2.600688  | 1.548118  | 0.811047  |
| C | 2.653683  | 1.435189  | 2.311706  |
| C | 2.389960  | -1.697045 | -0.130366 |
| C | 3.657393  | -1.542099 | 0.672938  |
| C | 0.137170  | 1.569477  | 0.247249  |
| C | 0.012987  | 0.469181  | -0.844518 |
| C | -0.024411 | -0.981067 | -0.314593 |
| C | 1.235221  | -1.311140 | 0.423843  |
| O | -0.926202 | 2.513450  | 0.005141  |
| C | -1.731016 | 2.150876  | -1.017694 |
| C | -1.230411 | 0.871733  | -1.591133 |
| O | -2.687930 | 2.801300  | -1.350901 |
| C | -1.864571 | 0.248713  | -2.580604 |
| C | 1.455230  | 2.361384  | 0.254475  |
| C | 2.557577  | -2.071902 | -1.577121 |
| O | 5.271163  | -0.476263 | -0.744330 |
| O | -1.133290 | -1.111207 | 0.591173  |
| C | -2.152639 | -1.928015 | 0.243786  |
| O | -2.188929 | -2.544213 | -0.797236 |
| C | -3.220715 | -1.967756 | 1.308096  |
| C | -4.150212 | -0.730206 | 1.327665  |
| C | -3.467631 | 0.523589  | 1.878225  |
| C | -4.775327 | -0.468967 | -0.044427 |
| H | 4.986650  | 0.065664  | 1.227376  |
| H | 3.279194  | 1.014921  | -1.089005 |
| H | 3.506836  | 0.851356  | 2.663050  |
| H | 1.745315  | 0.962780  | 2.705728  |
| H | 3.413275  | -1.536503 | 1.740022  |
| H | 4.370698  | -2.353099 | 0.493042  |
| H | 2.712211  | 2.430274  | 2.766471  |
| H | 0.882026  | 0.522653  | -1.511642 |
| H | -0.194497 | -1.652627 | -1.158371 |
| H | 1.225265  | -1.036626 | 1.477493  |
| H | -1.525057 | -0.702801 | -2.976755 |
| H | -2.765504 | 0.687313  | -2.999233 |
| H | 1.667641  | 2.689140  | -0.769224 |
| H | -0.058651 | 1.145119  | 1.237193  |
| H | 1.287391  | 3.260192  | 0.857877  |
| H | 3.110812  | -1.291848 | -2.113496 |
| H | 1.606587  | -2.240942 | -2.086743 |
| H | 3.157560  | -2.983628 | -1.661912 |
| H | 5.751270  | 0.329080  | -0.958754 |
| H | -3.813918 | -2.863171 | 1.108676  |
| H | -2.738925 | -2.076344 | 2.285191  |

|   |           |           |           |
|---|-----------|-----------|-----------|
| H | -4.957483 | -0.998003 | 2.021578  |
| H | -2.662326 | 0.862507  | 1.222382  |
| H | -4.188496 | 1.342267  | 1.962092  |
| H | -3.037589 | 0.342285  | 2.868978  |
| H | -5.251907 | -1.368696 | -0.446163 |
| H | -4.019236 | -0.140720 | -0.765315 |
| H | -5.528612 | 0.321472  | 0.021217  |

ωB97XD energy = -1154.82162298 a.u.

(2R,6R,7S,8R)-1, Conf. E

|   |           |           |           |
|---|-----------|-----------|-----------|
| C | -4.447648 | -0.525184 | -0.238961 |
| C | -3.572597 | 0.673431  | 0.039152  |
| C | -2.859467 | 1.376662  | -0.846096 |
| C | -2.965315 | 1.198480  | -2.337715 |
| C | -2.293330 | -1.794311 | 0.206136  |
| C | -3.596035 | -1.790911 | -0.555171 |
| C | -0.388342 | 1.647954  | -0.396629 |
| C | -0.114846 | 0.621641  | 0.739188  |
| C | 0.045110  | -0.841162 | 0.273392  |
| C | -1.200621 | -1.321309 | -0.403672 |
| O | 0.595016  | 2.692768  | -0.257365 |
| C | 1.467024  | 2.464225  | 0.747702  |
| C | 1.112769  | 1.177603  | 1.408743  |
| O | 2.368198  | 3.218841  | 1.009120  |
| C | 1.844671  | 0.669791  | 2.396565  |
| C | -1.773626 | 2.315702  | -0.373702 |
| C | -2.374216 | -2.130075 | 1.669728  |
| O | -5.249844 | -0.837227 | 0.895617  |
| O | 1.134536  | -0.902756 | -0.662998 |
| C | 2.208403  | -1.659346 | -0.343649 |
| O | 2.313804  | -2.259658 | 0.702477  |
| C | 3.234699  | -1.654164 | -1.448790 |
| C | 4.505282  | -0.839106 | -1.113630 |
| C | 4.179699  | 0.626886  | -0.821245 |
| C | 5.320669  | -1.463206 | 0.021090  |
| H | -5.101841 | -0.344239 | -1.103435 |
| H | -3.402295 | 0.854191  | 1.101245  |
| H | -2.043716 | 0.770588  | -2.751970 |
| H | -3.109410 | 2.167856  | -2.827336 |
| H | -3.389691 | -1.796990 | -1.630166 |
| H | -4.217972 | -2.662181 | -0.324543 |
| H | -3.789789 | 0.544384  | -2.628675 |
| H | -0.957238 | 0.624517  | 1.440985  |
| H | 0.305896  | -1.453710 | 1.138943  |
| H | -1.254951 | -1.086254 | -1.465422 |
| H | 1.613491  | -0.285394 | 2.856902  |
| H | 2.718272  | 1.211053  | 2.747790  |
| H | -1.973495 | 2.668132  | 0.644280  |
| H | -0.203229 | 1.191738  | -1.373758 |
| H | -1.716900 | 3.198055  | -1.020675 |
| H | -2.891597 | -3.084765 | 1.808024  |
| H | -2.971091 | -1.380715 | 2.203052  |
| H | -1.394115 | -2.202153 | 2.145998  |
| H | -5.800319 | -0.076283 | 1.102852  |
| H | 3.511869  | -2.698082 | -1.626845 |
| H | 2.774013  | -1.256340 | -2.356307 |

|   |          |           |           |
|---|----------|-----------|-----------|
| H | 5.113951 | -0.877038 | -2.026501 |
| H | 3.649244 | 0.729168  | 0.130655  |
| H | 5.096092 | 1.219186  | -0.744307 |
| H | 3.555501 | 1.070810  | -1.603587 |
| H | 5.566758 | -2.508498 | -0.191871 |
| H | 4.767805 | -1.440329 | 0.964911  |
| H | 6.257374 | -0.914051 | 0.160332  |

ωB97XD energy = -1154.82084725 a.u.

(2R,6R,7S,8R)-1, Conf. F

|   |           |           |           |
|---|-----------|-----------|-----------|
| C | 4.000831  | -1.311023 | 0.301625  |
| C | 3.448299  | 0.080273  | 0.498031  |
| C | 2.688193  | 0.515584  | 1.507436  |
| C | 2.404570  | -0.285112 | 2.750922  |
| C | 1.810294  | -1.657039 | -0.936231 |
| C | 2.881828  | -2.316130 | -0.104263 |
| C | 0.485736  | 1.608365  | 0.925597  |
| C | 0.290836  | 1.256104  | -0.576707 |
| C | -0.228322 | -0.171240 | -0.850544 |
| C | 0.715601  | -1.201903 | -0.316095 |
| O | -0.221626 | 2.843100  | 1.155987  |
| C | -0.893730 | 3.276692  | 0.067558  |
| C | -0.653012 | 2.327495  | -1.054552 |
| O | -1.564035 | 4.276714  | 0.075932  |
| C | -1.252877 | 2.465620  | -2.233875 |
| C | 1.937568  | 1.821474  | 1.385630  |
| C | 2.158895  | -1.363347 | -2.369567 |
| O | 4.969550  | -1.325533 | -0.741795 |
| O | -1.496939 | -0.308300 | -0.190766 |
| C | -2.583792 | -0.586597 | -0.942439 |
| O | -2.550777 | -0.724714 | -2.143660 |
| C | -3.814604 | -0.700436 | -0.080607 |
| C | -3.688586 | -1.758404 | 1.030990  |
| C | -4.971625 | -1.789969 | 1.863531  |
| C | -3.370254 | -3.137835 | 0.449069  |
| H | 4.460720  | -1.687683 | 1.226034  |
| H | 3.569795  | 0.726300  | -0.372418 |
| H | 2.963148  | -1.222459 | 2.789844  |
| H | 1.338311  | -0.531721 | 2.828197  |
| H | 2.436122  | -2.710678 | 0.814401  |
| H | 3.368884  | -3.145659 | -0.627319 |
| H | 2.655930  | 0.298487  | 3.643731  |
| H | 1.253088  | 1.338549  | -1.096234 |
| H | -0.389236 | -0.282840 | -1.924620 |
| H | 0.567445  | -1.446219 | 0.734687  |
| H | -1.111081 | 1.754285  | -3.041435 |
| H | -1.925901 | 3.301806  | -2.397511 |
| H | 2.432615  | 2.495154  | 0.677568  |
| H | -0.005210 | 0.860801  | 1.556236  |
| H | 1.895502  | 2.334954  | 2.352486  |
| H | 1.304427  | -1.012549 | -2.952344 |
| H | 2.558242  | -2.260564 | -2.852208 |
| H | 2.953706  | -0.609676 | -2.423496 |
| H | 5.681264  | -0.721234 | -0.510728 |
| H | -4.001276 | 0.283105  | 0.366447  |
| H | -4.650943 | -0.938779 | -0.743578 |

|   |           |           |           |
|---|-----------|-----------|-----------|
| H | -2.860206 | -1.458454 | 1.683743  |
| H | -4.890963 | -2.521845 | 2.673385  |
| H | -5.182732 | -0.813023 | 2.310310  |
| H | -5.831435 | -2.071878 | 1.244144  |
| H | -3.308830 | -3.888732 | 1.242971  |
| H | -2.415444 | -3.142075 | -0.087331 |
| H | -4.150416 | -3.452950 | -0.253597 |

ωB97XD energy = -1154.82064091 a.u.

(2R,6R,7S,8R)-1, Conf. G

|   |           |           |           |
|---|-----------|-----------|-----------|
| C | -4.235701 | -1.340536 | -0.312525 |
| C | -3.700593 | 0.069071  | -0.239023 |
| C | -3.075072 | 0.748341  | -1.205353 |
| C | -2.965590 | 0.272233  | -2.629793 |
| C | -1.906967 | -1.922284 | 0.518685  |
| C | -3.082642 | -2.387960 | -0.303671 |
| C | -0.802957 | 1.712670  | -0.669867 |
| C | -0.418002 | 1.022870  | 0.670069  |
| C | 0.119094  | -0.418434 | 0.532987  |
| C | -0.894084 | -1.312986 | -0.108496 |
| O | -0.115047 | 2.979399  | -0.696969 |
| C | 0.699100  | 3.159159  | 0.364845  |
| C | 0.589268  | 1.974184  | 1.260695  |
| O | 1.380071  | 4.142871  | 0.500847  |
| C | 1.329153  | 1.853347  | 2.359654  |
| C | -2.299513 | 2.001509  | -0.872185 |
| C | -2.069124 | -1.983251 | 2.012745  |
| O | -5.063139 | -1.624840 | 0.810937  |
| O | 1.297585  | -0.370870 | -0.289763 |
| C | 2.478109  | -0.712421 | 0.269005  |
| O | 2.590108  | -1.125335 | 1.400537  |
| C | 3.614129  | -0.466231 | -0.692111 |
| C | 4.885189  | -1.257035 | -0.369941 |
| C | 4.669207  | -2.759459 | -0.569690 |
| C | 6.047481  | -0.751342 | -1.227272 |
| H | -4.812731 | -1.496272 | -1.234767 |
| H | -3.699419 | 0.485890  | 0.768918  |
| H | -3.307684 | 1.052017  | -3.319229 |
| H | -3.547939 | -0.631188 | -2.821572 |
| H | -2.763494 | -2.544146 | -1.338914 |
| H | -3.506308 | -3.327459 | 0.066172  |
| H | -1.923043 | 0.055240  | -2.893907 |
| H | -1.303780 | 0.961132  | 1.313827  |
| H | 0.409913  | -0.776319 | 1.522712  |
| H | -0.881878 | -1.302350 | -1.197254 |
| H | 1.279416  | 0.976742  | 2.997780  |
| H | 2.024181  | 2.643812  | 2.626392  |
| H | -2.689646 | 2.474835  | 0.035628  |
| H | -0.409536 | 1.142287  | -1.516865 |
| H | -2.378296 | 2.733882  | -1.683183 |
| H | -2.851010 | -1.288400 | 2.342115  |
| H | -1.146621 | -1.752731 | 2.550056  |
| H | -2.402223 | -2.980840 | 2.315441  |
| H | -5.793633 | -0.999297 | 0.822351  |
| H | 3.266918  | -0.670263 | -1.711168 |
| H | 3.812221  | 0.613250  | -0.646515 |

|   |          |           |           |
|---|----------|-----------|-----------|
| H | 5.123812 | -1.082258 | 0.685439  |
| H | 5.579167 | -3.316534 | -0.325216 |
| H | 3.865172 | -3.136415 | 0.068599  |
| H | 4.415275 | -2.977497 | -1.614594 |
| H | 6.969104 | -1.292010 | -0.990353 |
| H | 6.232060 | 0.315735  | -1.064967 |
| H | 5.840450 | -0.899308 | -2.294172 |

ωB97XD energy = -1154.82060391 a.u.

(2R,6R,7S,8R)-1, Conf. H

|   |           |           |           |
|---|-----------|-----------|-----------|
| C | -3.944760 | -1.576813 | -0.222265 |
| C | -3.517829 | -0.137445 | -0.379868 |
| C | -2.859977 | 0.406057  | -1.408590 |
| C | -2.593173 | -0.309200 | -2.706455 |
| C | -1.666708 | -1.786494 | 0.882682  |
| C | -2.729512 | -2.502260 | 0.086816  |
| C | -0.721213 | 1.651854  | -0.900567 |
| C | -0.407928 | 1.250233  | 0.568761  |
| C | 0.241384  | -0.138368 | 0.742390  |
| C | -0.649897 | -1.222034 | 0.221360  |
| O | -0.129801 | 2.950023  | -1.109154 |
| C | 0.568056  | 3.389822  | -0.039360 |
| C | 0.469942  | 2.375617  | 1.046888  |
| O | 1.153362  | 4.441823  | -0.035056 |
| C | 1.119277  | 2.512831  | 2.199746  |
| C | -2.211369 | 1.763513  | -1.262799 |
| C | -1.953991 | -1.577040 | 2.343826  |
| O | -4.857593 | -1.714350 | 0.862274  |
| O | 1.469906  | -0.142045 | -0.004078 |
| C | 2.616874  | -0.389751 | 0.661587  |
| O | 2.670618  | -0.602991 | 1.851893  |
| C | 3.804840  | -0.402550 | -0.264066 |
| C | 4.402735  | -1.816989 | -0.393480 |
| C | 3.380256  | -2.804337 | -0.962664 |
| C | 5.664797  | -1.771132 | -1.256117 |
| H | -4.417527 | -1.952545 | -1.140413 |
| H | -3.633016 | 0.452993  | 0.529993  |
| H | -2.914665 | 0.307653  | -3.552999 |
| H | -3.104639 | -1.271481 | -2.773457 |
| H | -2.307163 | -2.831154 | -0.867987 |
| H | -3.120977 | -3.383286 | 0.605670  |
| H | -1.520467 | -0.494905 | -2.843005 |
| H | -1.341116 | 1.226440  | 1.144201  |
| H | 0.483424  | -0.280870 | 1.797439  |
| H | -0.544882 | -1.416302 | -0.844873 |
| H | 1.079097  | 1.758705  | 2.979392  |
| H | 1.726221  | 3.396806  | 2.370189  |
| H | -2.714542 | 2.358306  | -0.492428 |
| H | -0.211851 | 0.976769  | -1.594951 |
| H | -2.273031 | 2.323573  | -2.202347 |
| H | -1.125161 | -1.110012 | 2.879922  |
| H | -2.174372 | -2.535728 | 2.824233  |
| H | -2.850554 | -0.958971 | 2.472067  |
| H | -5.625391 | -1.160984 | 0.690918  |
| H | 3.511583  | -0.023501 | -1.247624 |
| H | 4.553330  | 0.274698  | 0.159257  |

|   |          |           |           |
|---|----------|-----------|-----------|
| H | 4.679320 | -2.146892 | 0.615275  |
| H | 3.821058 | -3.801036 | -1.062974 |
| H | 2.497668 | -2.893757 | -0.320836 |
| H | 3.043052 | -2.483172 | -1.955613 |
| H | 6.126157 | -2.761296 | -1.323897 |
| H | 6.407240 | -1.080148 | -0.843773 |
| H | 5.428458 | -1.442673 | -2.275378 |

ωB97XD energy = -1154.82044635 a.u.

(2R,6R,7S,8R)-1, Conf. I

|   |           |           |           |
|---|-----------|-----------|-----------|
| C | 3.800217  | -1.613354 | 0.082633  |
| C | 3.421113  | -0.160128 | 0.235041  |
| C | 2.828460  | 0.418349  | 1.284213  |
| C | 2.601840  | -0.269607 | 2.604384  |
| C | 1.468398  | -1.780919 | -0.911960 |
| C | 2.547000  | -2.509828 | -0.149508 |
| C | 0.702400  | 1.715714  | 0.857591  |
| C | 0.308260  | 1.303192  | -0.588919 |
| C | -0.382791 | -0.069628 | -0.711561 |
| C | 0.504263  | -1.168825 | -0.215290 |
| O | 0.156121  | 3.031979  | 1.075141  |
| C | -0.582551 | 3.474890  | 0.034324  |
| C | -0.563645 | 2.443921  | -1.040527 |
| O | -1.140321 | 4.541687  | 0.042806  |
| C | -1.263680 | 2.582314  | -2.163111 |
| C | 2.210919  | 1.791133  | 1.145829  |
| C | 1.687525  | -1.617751 | -2.390412 |
| O | 4.653851  | -1.794660 | -1.042877 |
| O | -1.571526 | -0.029373 | 0.093540  |
| C | -2.746492 | -0.354561 | -0.486997 |
| O | -2.861446 | -0.617544 | -1.662959 |
| C | -3.861130 | -0.383856 | 0.525950  |
| C | -4.087964 | -1.797642 | 1.115892  |
| C | -4.611102 | -2.781337 | 0.066533  |
| C | -2.836608 | -2.342699 | 1.810726  |
| H | 4.307300  | -1.986537 | 0.983414  |
| H | 3.509607  | 0.412140  | -0.689293 |
| H | 3.107947  | -1.234786 | 2.671692  |
| H | 1.532991  | -0.444627 | 2.780738  |
| H | 2.160516  | -2.805580 | 0.831009  |
| H | 2.888986  | -3.412791 | -0.665608 |
| H | 2.956920  | 0.360216  | 3.427420  |
| H | 1.211467  | 1.248299  | -1.208492 |
| H | -0.678520 | -0.219659 | -1.751822 |
| H | 0.448509  | -1.335898 | 0.859350  |
| H | -1.277645 | 1.818016  | -2.933784 |
| H | -1.855579 | 3.479276  | -2.317609 |
| H | 2.692264  | 2.358685  | 0.341665  |
| H | 0.209399  | 1.063477  | 1.584955  |
| H | 2.333469  | 2.364072  | 2.071450  |
| H | 1.851577  | -2.595152 | -2.855628 |
| H | 2.596461  | -1.034510 | -2.579637 |
| H | 0.847811  | -1.136547 | -2.896200 |
| H | 5.444656  | -1.261308 | -0.919213 |
| H | -3.625115 | 0.315950  | 1.332072  |
| H | -4.771573 | -0.049925 | 0.021796  |

|   |           |           |           |
|---|-----------|-----------|-----------|
| H | -4.867369 | -1.669649 | 1.877954  |
| H | -4.831225 | -3.748701 | 0.529143  |
| H | -5.527340 | -2.411167 | -0.403651 |
| H | -3.874473 | -2.943938 | -0.726774 |
| H | -3.066589 | -3.279371 | 2.328005  |
| H | -2.444086 | -1.632606 | 2.545825  |
| H | -2.040387 | -2.550361 | 1.087010  |

ωB97XD energy = -1154.81959221 a.u.

(2R,6R,7S,8R)-1, Conf. J

|   |           |           |           |
|---|-----------|-----------|-----------|
| C | -4.162286 | -1.414930 | -0.272899 |
| C | -3.669333 | 0.007044  | -0.287395 |
| C | -3.024264 | 0.627907  | -1.278334 |
| C | -2.855122 | 0.056174  | -2.661599 |
| C | -1.825315 | -1.895797 | 0.610303  |
| C | -2.968967 | -2.427652 | -0.215415 |
| C | -0.800568 | 1.695618  | -0.755625 |
| C | -0.437175 | 1.098394  | 0.633264  |
| C | 0.150461  | -0.329075 | 0.595377  |
| C | -0.813626 | -1.291236 | -0.023291 |
| O | -0.142950 | 2.975668  | -0.840979 |
| C | 0.632711  | 3.242102  | 0.230885  |
| C | 0.522002  | 2.112858  | 1.196899  |
| O | 1.285615  | 4.249388  | 0.325645  |
| C | 1.223496  | 2.083347  | 2.326734  |
| C | -2.298308 | 1.926383  | -1.013447 |
| C | -2.021338 | -1.879832 | 2.101652  |
| O | -5.002491 | -1.524281 | 0.869624  |
| O | 1.351817  | -0.284591 | -0.193609 |
| C | 2.517712  | -0.600635 | 0.407386  |
| O | 2.600136  | -0.984916 | 1.551935  |
| C | 3.687901  | -0.383217 | -0.518756 |
| C | 4.789512  | -1.437640 | -0.354833 |
| C | 4.294840  | -2.817881 | -0.795565 |
| C | 6.036212  | -1.023055 | -1.138388 |
| H | -4.744802 | -1.638741 | -1.178285 |
| H | -3.745263 | 0.498837  | 0.681451  |
| H | -3.197139 | 0.777681  | -3.411899 |
| H | -3.411274 | -0.872028 | -2.808177 |
| H | -2.628556 | -2.604008 | -1.241156 |
| H | -3.348678 | -3.382188 | 0.171916  |
| H | -1.800508 | -0.150623 | -2.882996 |
| H | -1.341412 | 1.043479  | 1.251434  |
| H | 0.421201  | -0.620273 | 1.612319  |
| H | -0.772003 | -1.338161 | -1.110075 |
| H | 1.171433  | 1.249598  | 3.019922  |
| H | 1.886759  | 2.909031  | 2.566441  |
| H | -2.726648 | 2.445582  | -0.149110 |
| H | -0.368710 | 1.086397  | -1.555478 |
| H | -2.377461 | 2.600278  | -1.873708 |
| H | -2.802844 | -1.162873 | 2.380084  |
| H | -1.107441 | -1.629544 | 2.644749  |
| H | -2.364617 | -2.859485 | 2.449915  |
| H | -5.390631 | -2.403170 | 0.891590  |
| H | 3.329902  | -0.343621 | -1.552491 |
| H | 4.080834  | 0.613535  | -0.279385 |



|   |          |           |           |
|---|----------|-----------|-----------|
| H | 5.041790 | -1.486273 | 0.710657  |
| H | 5.075078 | -3.572953 | -0.657569 |
| H | 3.420374 | -3.134859 | -0.218553 |
| H | 4.021035 | -2.810167 | -1.857883 |
| H | 6.829248 | -1.769467 | -1.029096 |
| H | 6.428007 | -0.061990 | -0.789138 |
| H | 5.814054 | -0.927392 | -2.208113 |

ωB97XD energy = -1154.81943578 a.u.

(2R,6R,7S,8S)-1, Conf. A

|   |           |           |           |
|---|-----------|-----------|-----------|
| C | 2.208545  | -3.162266 | -0.306593 |
| C | 2.658358  | -1.779261 | -0.708772 |
| C | 3.263946  | -0.876739 | 0.068846  |
| C | 3.783219  | -1.180964 | 1.449849  |
| C | 0.083623  | -1.894634 | 0.264121  |
| C | 0.928665  | -3.104324 | 0.585815  |
| C | 2.180764  | 1.379028  | 0.325477  |
| C | 0.757549  | 1.210010  | -0.288345 |
| C | -0.228242 | 0.598449  | 0.735770  |
| C | 0.173827  | -0.819607 | 1.058336  |
| O | 2.514718  | 2.776196  | 0.230939  |
| C | 1.542481  | 3.511353  | -0.351848 |
| C | 0.417872  | 2.608490  | -0.729017 |
| O | 1.639761  | 4.699491  | -0.516292 |
| C | -0.648668 | 3.068642  | -1.379583 |
| C | 3.307372  | 0.575923  | -0.346132 |
| C | -0.665126 | -1.961073 | -1.040010 |
| O | 1.886065  | -3.944659 | -1.452696 |
| O | -1.545555 | 0.688083  | 0.175525  |
| C | -2.571762 | 0.761486  | 1.050931  |
| O | -2.420962 | 0.806008  | 2.249123  |
| C | -3.895930 | 0.758908  | 0.331960  |
| C | -4.151584 | -0.546272 | -0.446162 |
| C | -4.038576 | -1.769076 | 0.467145  |
| C | -5.521172 | -0.484281 | -1.124653 |
| H | 2.987655  | -3.678512 | 0.271154  |
| H | 2.281700  | -1.457265 | -1.680111 |
| H | 3.869928  | -2.253160 | 1.638143  |
| H | 3.124241  | -0.766145 | 2.222957  |
| H | 1.245873  | -3.063194 | 1.632330  |
| H | 0.390576  | -4.045600 | 0.431693  |
| H | 4.769293  | -0.728298 | 1.597941  |
| H | 0.804902  | 0.536382  | -1.150489 |
| H | -0.216238 | 1.199732  | 1.649953  |
| H | 0.741938  | -0.917696 | 1.981200  |
| H | -1.460153 | 2.414401  | -1.676473 |
| H | -0.710464 | 4.126645  | -1.617063 |
| H | 3.217388  | 0.681382  | -1.432841 |
| H | 2.163168  | 1.155548  | 1.397412  |
| H | 4.253515  | 1.039152  | -0.046095 |
| H | -1.094911 | -1.004368 | -1.333785 |
| H | -1.483660 | -2.685951 | -0.952313 |
| H | -0.011658 | -2.334976 | -1.834620 |
| H | 2.665122  | -4.003744 | -2.013702 |
| H | -4.672083 | 0.908939  | 1.087593  |

|   |           |           |           |
|---|-----------|-----------|-----------|
| H | -3.919462 | 1.609166  | -0.359427 |
| H | -3.384754 | -0.626365 | -1.225823 |
| H | -3.043836 | -1.851435 | 0.918404  |
| H | -4.770490 | -1.713496 | 1.281116  |
| H | -4.228474 | -2.689365 | -0.094511 |
| H | -6.320050 | -0.394680 | -0.379195 |

ωB97XD energy = -1154.81683060 a.u.

(2R,6R,7S,8S)-1, Conf. B

|   |           |           |           |
|---|-----------|-----------|-----------|
| C | 4.094440  | -1.636245 | 0.368128  |
| C | 3.773741  | -0.157684 | 0.317789  |
| C | 3.325785  | 0.561010  | -0.719070 |
| C | 3.313222  | 0.093554  | -2.148000 |
| C | 1.573765  | -1.845496 | 0.687043  |
| C | 2.820914  | -2.511839 | 0.159107  |
| C | 1.363780  | 1.741918  | 0.332783  |
| C | 0.145747  | 1.169195  | -0.452466 |
| C | -0.286758 | -0.207488 | 0.102341  |
| C | 0.770936  | -1.225478 | -0.184719 |
| O | 0.972070  | 3.036402  | 0.825929  |
| C | -0.304016 | 3.352798  | 0.519089  |
| C | -0.888702 | 2.253831  | -0.301990 |
| O | -0.820847 | 4.380337  | 0.873566  |
| C | -2.119852 | 2.348579  | -0.799950 |
| C | 2.680070  | 1.907596  | -0.440527 |
| C | 1.418730  | -1.785593 | 2.181946  |
| O | 5.026321  | -2.084656 | -0.610026 |
| O | -1.502919 | -0.566457 | -0.580903 |
| C | -2.386064 | -1.312814 | 0.110090  |
| O | -2.214433 | -1.657799 | 1.257555  |
| C | -3.603706 | -1.650985 | -0.713707 |
| C | -4.912105 | -1.304657 | 0.014851  |
| C | -5.024112 | 0.202349  | 0.259419  |
| C | -6.109332 | -1.823882 | -0.782982 |
| H | 4.497344  | -1.848621 | 1.368430  |
| H | 3.732089  | 0.314728  | 1.300163  |
| H | 3.716274  | -0.913438 | -2.258889 |
| H | 3.916393  | 0.772641  | -2.763033 |
| H | 2.992171  | -3.487743 | 0.625902  |
| H | 2.727369  | -2.672736 | -0.918668 |
| H | 2.297546  | 0.124586  | -2.560637 |
| H | 0.402419  | 1.040989  | -1.510221 |
| H | -0.505625 | -0.119605 | 1.168885  |
| H | 0.977767  | -1.343715 | -1.247788 |
| H | -2.547263 | 1.571839  | -1.422650 |
| H | -2.714340 | 3.229669  | -0.576018 |
| H | 2.487643  | 2.457067  | -1.368938 |
| H | 1.557768  | 1.128385  | 1.218598  |
| H | 3.333326  | 2.533050  | 0.176059  |
| H | 1.620244  | -2.769141 | 2.618594  |
| H | 0.415210  | -1.484710 | 2.488141  |
| H | 2.143422  | -1.088354 | 2.623392  |
| H | 5.821575  | -1.548742 | -0.537191 |
| H | -3.549956 | -1.138253 | -1.679306 |
| H | -3.562690 | -2.729421 | -0.907238 |
| H | -4.888624 | -1.812577 | 0.985821  |

|   |           |           |           |
|---|-----------|-----------|-----------|
| H | -5.951159 | 0.441937  | 0.789022  |
| H | -4.191352 | 0.580033  | 0.861715  |
| H | -5.032386 | 0.749074  | -0.691771 |
| H | -7.047091 | -1.612510 | -0.259966 |

ωB97XD energy = -1154.81617638 a.u.

(2R,6R,7S,8S)-1, Conf. C

|   |           |           |           |
|---|-----------|-----------|-----------|
| C | 2.759766  | -2.817992 | -0.373862 |
| C | 2.917366  | -1.454200 | -0.976670 |
| C | 3.198759  | -0.340948 | -0.290177 |
| C | 3.706203  | -0.340122 | 1.133507  |
| C | 0.595822  | -1.956667 | 0.647339  |
| C | 1.250489  | -3.088239 | -0.112624 |
| C | 1.811732  | 1.762141  | -0.051944 |
| C | 0.310959  | 1.545659  | -0.409243 |
| C | -0.363107 | 0.414781  | 0.389996  |
| C | 0.123897  | -0.926204 | -0.063958 |
| O | 2.052472  | 3.172143  | -0.231769 |
| C | 0.905970  | 3.884808  | -0.198171 |
| C | -0.247138 | 2.936748  | -0.203876 |
| O | 0.889669  | 5.088019  | -0.186359 |
| C | -1.490723 | 3.397426  | -0.082994 |
| C | 2.894971  | 1.024911  | -0.857955 |
| C | 0.640933  | -2.042988 | 2.146230  |
| O | 3.188441  | -3.864105 | -1.234828 |
| O | -1.777975 | 0.492841  | 0.097676  |
| C | -2.613764 | -0.059766 | 1.000390  |
| O | -2.251878 | -0.467117 | 2.080514  |
| C | -4.025603 | -0.109756 | 0.474759  |
| C | -4.149881 | -0.912221 | -0.834753 |
| C | -3.578273 | -2.323752 | -0.677264 |
| C | -5.612363 | -0.952009 | -1.281175 |
| H | 3.292632  | -2.884317 | 0.584112  |
| H | 2.541568  | -1.365896 | -1.996683 |
| H | 4.306055  | -1.223838 | 1.361024  |
| H | 2.883666  | -0.310300 | 1.857483  |
| H | 1.166093  | -4.040231 | 0.421487  |
| H | 0.780299  | -3.217816 | -1.093041 |
| H | 4.328478  | 0.541865  | 1.316598  |
| H | 0.235335  | 1.298966  | -1.477791 |
| H | -0.224646 | 0.577790  | 1.461886  |
| H | 0.129574  | -1.024688 | -1.149480 |
| H | -2.354521 | 2.746972  | -0.110609 |
| H | -1.638013 | 4.466173  | 0.042610  |
| H | 2.596533  | 0.961738  | -1.909589 |
| H | 1.950745  | 1.564460  | 1.017968  |
| H | 3.787149  | 1.660140  | -0.806398 |
| H | 0.272433  | -1.143354 | 2.640008  |
| H | 1.659208  | -2.256484 | 2.492431  |
| H | 0.011153  | -2.875355 | 2.479564  |
| H | 4.109689  | -3.711620 | -1.463927 |
| H | -4.644635 | -0.554426 | 1.258989  |
| H | -4.373037 | 0.917369  | 0.309872  |
| H | -3.566371 | -0.387968 | -1.600978 |
| H | -3.697102 | -2.891756 | -1.605213 |
| H | -2.510903 | -2.304637 | -0.431644 |

|   |           |           |           |
|---|-----------|-----------|-----------|
| H | -4.097520 | -2.866636 | 0.121258  |
| H | -5.712194 | -1.472233 | -2.238843 |

ωB97XD energy = -1154.81597232 a.u.

(2R,6R,7S,8S)-1, Conf. D

|   |           |           |           |
|---|-----------|-----------|-----------|
| C | 3.958502  | -1.677525 | -0.424535 |
| C | 3.471791  | -0.362800 | -0.959096 |
| C | 3.436277  | 0.806315  | -0.309457 |
| C | 4.185331  | 1.125655  | 0.959486  |
| C | 1.618823  | -1.831515 | 0.532267  |
| C | 2.727128  | -2.587168 | -0.165975 |
| C | 1.181731  | 1.802152  | 0.086079  |
| C | -0.052165 | 1.085967  | -0.551238 |
| C | -0.355134 | -0.247014 | 0.174300  |
| C | 0.657789  | -1.278918 | -0.215229 |
| O | 0.763471  | 3.141170  | 0.413542  |
| C | -0.546856 | 3.357559  | 0.173076  |
| C | -1.128328 | 2.136197  | -0.451813 |
| O | -1.089951 | 4.400569  | 0.429717  |
| C | -2.388348 | 2.125030  | -0.879824 |
| C | 2.475849  | 1.887014  | -0.754036 |
| C | 1.781644  | -1.619981 | 2.011074  |
| O | 4.780484  | -2.390315 | -1.339568 |
| O | -1.657275 | -0.701376 | -0.248025 |
| C | -2.305489 | -1.509269 | 0.619168  |
| O | -1.888066 | -1.761304 | 1.726440  |
| C | -3.581073 | -2.063425 | 0.034392  |
| C | -4.544295 | -1.013056 | -0.541153 |
| C | -5.792299 | -1.703077 | -1.095896 |
| C | -4.912960 | 0.036912  | 0.508799  |
| H | 4.494778  | -1.536786 | 0.522390  |
| H | 2.907288  | -0.449185 | -1.888409 |
| H | 4.832631  | 1.993251  | 0.786960  |
| H | 4.812904  | 0.305861  | 1.312091  |
| H | 3.054312  | -3.459795 | 0.408978  |
| H | 2.387937  | -2.943097 | -1.144259 |
| H | 3.504775  | 1.405685  | 1.772126  |
| H | 0.147292  | 0.861612  | -1.605369 |
| H | -0.392441 | -0.076433 | 1.252261  |
| H | 0.647303  | -1.498206 | -1.283378 |
| H | -2.817676 | 1.261622  | -1.371893 |
| H | -3.005062 | 3.006463  | -0.730414 |
| H | 2.244535  | 1.802356  | -1.820484 |
| H | 1.413601  | 1.325680  | 1.044852  |
| H | 2.902274  | 2.881055  | -0.584057 |
| H | 0.894495  | -1.187336 | 2.476461  |
| H | 2.640402  | -0.967879 | 2.215319  |
| H | 1.983887  | -2.576394 | 2.504204  |
| H | 5.532756  | -1.836455 | -1.567319 |
| H | -3.296781 | -2.772731 | -0.752505 |
| H | -4.069086 | -2.629869 | 0.832780  |
| H | -4.036260 | -0.514352 | -1.375552 |
| H | -6.475188 | -0.973068 | -1.541350 |
| H | -5.534394 | -2.438858 | -1.864558 |
| H | -6.334713 | -2.224184 | -0.298200 |
| H | -5.595967 | 0.783524  | 0.091280  |

ωB97XD energy = -1154.81592944 a.u.

(2R,6R,7S,8S)-1, Conf. E

|   |           |           |           |
|---|-----------|-----------|-----------|
| C | -4.114427 | -1.463613 | -0.215824 |
| C | -3.724894 | -0.003307 | -0.130437 |
| C | -3.155945 | 0.647470  | 0.891791  |
| C | -3.035888 | 0.112361  | 2.291694  |
| C | -1.645183 | -1.757021 | -0.776618 |
| C | -2.866351 | -2.396975 | -0.162397 |
| C | -1.242540 | 1.794031  | -0.281402 |
| C | 0.014888  | 1.137658  | 0.368175  |
| C | 0.333243  | -0.221185 | -0.296377 |
| C | -0.743888 | -1.203954 | 0.041766  |
| O | -0.839357 | 3.092003  | -0.755591 |
| C | 0.466695  | 3.350824  | -0.534939 |
| C | 1.070236  | 2.197047  | 0.191612  |
| O | 0.993664  | 4.375121  | -0.883974 |
| C | 2.331482  | 2.236543  | 0.614450  |
| C | -2.477214 | 1.977696  | 0.613342  |
| C | -1.621560 | -1.641846 | -2.275619 |
| O | -4.974429 | -1.920533 | 0.822139  |
| O | 1.589014  | -0.683049 | 0.240888  |
| C | 2.274095  | -1.554798 | -0.529707 |
| O | 1.927919  | -1.864389 | -1.646924 |
| C | 3.491880  | -2.095512 | 0.177302  |
| C | 4.440104  | -1.024887 | 0.740901  |
| C | 5.618327  | -1.696569 | 1.449068  |
| C | 4.922590  | -0.076932 | -0.359097 |
| H | -4.612682 | -1.612339 | -1.184195 |
| H | -3.748781 | 0.511877  | -1.091781 |
| H | -1.985542 | 0.073718  | 2.605198  |
| H | -3.478874 | -0.878326 | 2.396373  |
| H | -3.120772 | -3.343911 | -0.650206 |
| H | -2.682941 | -2.608258 | 0.895126  |
| H | -3.541533 | 0.790179  | 2.990182  |
| H | -0.160044 | 0.960349  | 1.435382  |
| H | 0.452520  | -0.081706 | -1.373183 |
| H | -0.863414 | -1.357077 | 1.113730  |
| H | 2.772754  | 1.419762  | 1.172125  |
| H | 2.937613  | 3.110303  | 0.393495  |
| H | -2.180497 | 2.477451  | 1.542357  |
| H | -1.540152 | 1.228938  | -1.170587 |
| H | -3.153468 | 2.655885  | 0.083531  |
| H | -1.899269 | -2.599398 | -2.727960 |
| H | -0.637940 | -1.365648 | -2.659404 |
| H | -2.355589 | -0.902511 | -2.623232 |
| H | -5.750651 | -1.353135 | 0.842696  |
| H | 3.137153  | -2.738114 | 0.992388  |
| H | 4.017768  | -2.729345 | -0.542350 |
| H | 3.882455  | -0.445048 | 1.486536  |
| H | 6.288384  | -0.948958 | 1.884785  |
| H | 5.278471  | -2.356562 | 2.253959  |
| H | 6.204071  | -2.298801 | 0.744661  |
| H | 5.590210  | 0.688064  | 0.049925  |

ωB97XD energy = -1154.81587062 a.u.

(2R,6R,7S,8S)-1, Conf. F

|   |           |           |           |
|---|-----------|-----------|-----------|
| C | 3.878486  | -1.951832 | -0.284486 |
| C | 3.666153  | -0.539031 | -0.738910 |
| C | 3.431440  | 0.498645  | 0.071965  |
| C | 3.654729  | 0.461532  | 1.566481  |
| C | 1.398512  | -1.979370 | 0.288617  |
| C | 2.532496  | -2.725462 | -0.378628 |
| C | 1.382207  | 1.975220  | 0.163655  |
| C | 0.141057  | 1.358028  | -0.546747 |
| C | -0.251248 | -0.034637 | -0.015216 |
| C | 0.737332  | -1.073923 | -0.441781 |
| O | 1.153932  | 3.398825  | 0.180239  |
| C | -0.149854 | 3.701019  | 0.003639  |
| C | -0.885438 | 2.455184  | -0.364697 |
| O | -0.578681 | 4.819341  | 0.121162  |
| C | -2.208444 | 2.484875  | -0.515761 |
| C | 2.779806  | 1.759836  | -0.442852 |
| C | 1.192237  | -2.245601 | 1.752736  |
| O | 4.788154  | -2.674485 | -1.103033 |
| O | -1.528722 | -0.348334 | -0.619042 |
| C | -2.329081 | -1.195794 | 0.053006  |
| O | -2.055828 | -1.654935 | 1.139217  |
| C | -3.594257 | -1.489733 | -0.715940 |
| C | -4.846809 | -1.471998 | 0.171315  |
| C | -5.068659 | -0.084999 | 0.780539  |
| C | -6.066745 | -1.918508 | -0.636585 |
| H | 4.219483  | -1.976654 | 0.759318  |
| H | 3.467330  | -0.432024 | -1.805768 |
| H | 4.472225  | -0.205636 | 1.847622  |
| H | 2.759914  | 0.122869  | 2.101410  |
| H | 2.682400  | -3.715547 | 0.064378  |
| H | 2.326980  | -2.868744 | -1.444365 |
| H | 3.895126  | 1.461306  | 1.942319  |
| H | 0.358840  | 1.261813  | -1.619647 |
| H | -0.388049 | 0.002702  | 1.068558  |
| H | 0.975811  | -1.014933 | -1.503595 |
| H | -2.780548 | 1.616151  | -0.811967 |
| H | -2.727214 | 3.423009  | -0.340427 |
| H | 2.713189  | 1.757301  | -1.535742 |
| H | 1.382837  | 1.656515  | 1.213183  |
| H | 3.370169  | 2.635998  | -0.150033 |
| H | 0.843090  | -3.275242 | 1.888358  |
| H | 0.449022  | -1.590959 | 2.209101  |
| H | 2.138472  | -2.157185 | 2.299751  |
| H | 5.628023  | -2.206506 | -1.111391 |
| H | -3.692284 | -0.776903 | -1.541581 |
| H | -3.465113 | -2.483680 | -1.162295 |
| H | -4.682073 | -2.185721 | 0.986605  |
| H | -5.957158 | -0.078384 | 1.419375  |
| H | -4.218122 | 0.228240  | 1.394414  |
| H | -5.219296 | 0.665277  | -0.005972 |
| H | -6.961758 | -1.944140 | -0.007252 |

ωB97XD energy = -1154.81586066 a.u.

(2R,6R,7S,8S)-1, Conf. G

|   |          |           |           |
|---|----------|-----------|-----------|
| C | 3.599737 | -2.010942 | -0.441978 |
|---|----------|-----------|-----------|

|   |           |           |           |
|---|-----------|-----------|-----------|
| C | 3.303561  | -0.579541 | -0.817046 |
| C | 3.454407  | 0.501061  | -0.045606 |
| C | 4.153425  | 0.485156  | 1.288434  |
| C | 1.167306  | -1.935857 | 0.288280  |
| C | 2.514874  | -2.575066 | 0.527533  |
| C | 1.429310  | 1.943609  | 0.335349  |
| C | 0.235209  | 1.112275  | -0.225660 |
| C | -0.283290 | 0.100090  | 0.823992  |
| C | 0.781260  | -0.935863 | 1.090934  |
| O | 1.038068  | 3.328004  | 0.283321  |
| C | -0.191305 | 3.507028  | -0.247547 |
| C | -0.747412 | 2.177777  | -0.628989 |
| O | -0.691246 | 4.594546  | -0.372282 |
| C | -1.911178 | 2.075667  | -1.266515 |
| C | 2.766768  | 1.796643  | -0.410174 |
| C | 0.455604  | -2.391204 | -0.958743 |
| O | 3.609572  | -2.846262 | -1.595998 |
| O | -1.497086 | -0.472333 | 0.316997  |
| C | -2.314260 | -1.044223 | 1.228279  |
| O | -2.116079 | -0.993060 | 2.419153  |
| C | -3.458745 | -1.773272 | 0.568441  |
| C | -4.185999 | -0.995557 | -0.538249 |
| C | -5.278914 | -1.870330 | -1.156198 |
| C | -4.763879 | 0.317340  | -0.005265 |
| H | 4.569735  | -2.094352 | 0.067213  |
| H | 2.753411  | -0.474656 | -1.752829 |
| H | 4.679864  | -0.452400 | 1.477307  |
| H | 3.442155  | 0.632681  | 2.110788  |
| H | 2.839932  | -2.374977 | 1.553038  |
| H | 2.492822  | -3.660781 | 0.385290  |
| H | 4.880184  | 1.302459  | 1.348727  |
| H | 0.561410  | 0.540826  | -1.101074 |
| H | -0.525394 | 0.629442  | 1.750923  |
| H | 1.393752  | -0.722029 | 1.964610  |
| H | -2.311810 | 1.116973  | -1.573293 |
| H | -2.479192 | 2.975533  | -1.483886 |
| H | 2.581723  | 1.859118  | -1.488165 |
| H | 1.581050  | 1.725862  | 1.397511  |
| H | 3.384458  | 2.657398  | -0.131225 |
| H | 1.152113  | -2.410587 | -1.803350 |
| H | -0.410447 | -1.779014 | -1.207703 |
| H | 0.113985  | -3.424729 | -0.823375 |
| H | 4.283180  | -2.524679 | -2.202603 |
| H | -3.040754 | -2.699385 | 0.152656  |
| H | -4.155316 | -2.055881 | 1.362999  |
| H | -3.452852 | -0.765180 | -1.320858 |
| H | -4.864882 | -2.797143 | -1.566920 |
| H | -6.031951 | -2.140019 | -0.406613 |
| H | -5.789711 | -1.341451 | -1.966958 |
| H | -5.499580 | 0.122823  | 0.783610  |

ωB97XD energy = -1154.81574253 a.u.

(2R,6R,7S,8S)-1, Conf. H

|   |          |           |           |
|---|----------|-----------|-----------|
| C | 2.998130 | -2.642113 | 0.359193  |
| C | 3.269158 | -1.179892 | 0.076428  |
| C | 2.926422 | -0.464366 | -1.001995 |

|   |           |           |           |
|---|-----------|-----------|-----------|
| C | 2.434036  | -1.043083 | -2.299551 |
| C | 0.716928  | -1.755408 | 1.068054  |
| C | 1.472173  | -2.931387 | 0.499177  |
| C | 1.841764  | 1.548732  | 0.072132  |
| C | 0.359569  | 1.443891  | -0.400352 |
| C | -0.437785 | 0.435725  | 0.455043  |
| C | 0.074764  | -0.949519 | 0.216049  |
| O | 2.097763  | 2.940467  | 0.335674  |
| C | 1.008473  | 3.719135  | 0.161217  |
| C | -0.123697 | 2.867410  | -0.304355 |
| O | 1.021707  | 4.906102  | 0.359480  |
| C | -1.311425 | 3.397383  | -0.588598 |
| C | 2.926349  | 1.050679  | -0.895148 |
| C | 0.888988  | -1.482203 | 2.536451  |
| O | 3.463990  | -3.545257 | -0.637326 |
| O | -1.807290 | 0.508363  | 0.016214  |
| C | -2.743219 | 0.101034  | 0.899990  |
| O | -2.497380 | -0.159360 | 2.055145  |
| C | -4.093742 | -0.013856 | 0.241878  |
| C | -4.106286 | -1.067534 | -0.883910 |
| C | -3.628014 | -2.429841 | -0.374372 |
| C | -5.505602 | -1.164426 | -1.493527 |
| H | 3.482212  | -2.884283 | 1.315777  |
| H | 3.619840  | -0.623962 | 0.947080  |
| H | 2.364305  | -2.130741 | -2.270889 |
| H | 3.119051  | -0.764466 | -3.109575 |
| H | 1.345777  | -3.833679 | 1.106789  |
| H | 1.105521  | -3.156427 | -0.506466 |
| H | 1.455898  | -0.624137 | -2.564389 |
| H | 0.319220  | 1.107150  | -1.442885 |
| H | -0.392075 | 0.728040  | 1.506850  |
| H | 0.008895  | -1.253619 | -0.828157 |
| H | -2.135419 | 2.792129  | -0.947337 |
| H | -1.459699 | 4.464854  | -0.454575 |
| H | 2.776881  | 1.519959  | -1.874173 |
| H | 1.963205  | 1.031090  | 1.029465  |
| H | 3.883697  | 1.413195  | -0.507398 |
| H | 1.900000  | -1.109714 | 2.749387  |
| H | 0.766670  | -2.409798 | 3.104827  |
| H | 0.163558  | -0.759625 | 2.914629  |
| H | 4.401034  | -3.381477 | -0.778861 |
| H | -4.813978 | -0.277321 | 1.021218  |
| H | -4.371206 | 0.964135  | -0.168038 |
| H | -3.411170 | -0.727456 | -1.661119 |
| H | -3.653342 | -3.172871 | -1.177554 |
| H | -2.602602 | -2.385825 | 0.008241  |
| H | -4.271785 | -2.787649 | 0.437548  |
| H | -5.520020 | -1.884499 | -2.317599 |

ωB97XD energy = -1154.81572217 a.u.

(2R,6R,7S,8S)-1, Conf. I

|   |          |           |           |
|---|----------|-----------|-----------|
| C | 3.819218 | -1.920442 | -0.302895 |
| C | 3.506903 | -0.483588 | -0.641383 |
| C | 3.521860 | 0.559592  | 0.193492  |
| C | 4.067007 | 0.499592  | 1.596315  |
| C | 1.319124 | -1.968318 | 0.147258  |

|   |           |           |           |
|---|-----------|-----------|-----------|
| C | 2.655060  | -2.576390 | 0.503354  |
| C | 1.415387  | 1.918693  | 0.417262  |
| C | 0.315624  | 1.078757  | -0.300837 |
| C | -0.259053 | -0.015729 | 0.630295  |
| C | 0.808387  | -1.030053 | 0.954911  |
| O | 0.985976  | 3.292303  | 0.377892  |
| C | -0.198517 | 3.455470  | -0.251054 |
| C | -0.676446 | 2.126816  | -0.728512 |
| O | -0.721994 | 4.531820  | -0.376921 |
| C | -1.796358 | 2.011825  | -1.439091 |
| C | 2.827868  | 1.846661  | -0.187021 |
| C | 0.765553  | -2.373758 | -1.192949 |
| O | 3.999106  | -2.692672 | -1.486647 |
| O | -1.391930 | -0.588684 | -0.039282 |
| C | -2.355350 | -1.116948 | 0.742093  |
| O | -2.310454 | -1.111512 | 1.950411  |
| C | -3.487693 | -1.689097 | -0.073307 |
| C | -4.838552 | -1.049003 | 0.291037  |
| C | -4.843711 | 0.448398  | -0.026474 |
| C | -5.973481 | -1.769694 | -0.438423 |
| H | 4.726702  | -1.993682 | 0.312081  |
| H | 3.060392  | -0.351068 | -1.627527 |
| H | 3.263267  | 0.570140  | 2.339906  |
| H | 4.741900  | 1.342493  | 1.780728  |
| H | 2.854584  | -2.425338 | 1.568632  |
| H | 2.693121  | -3.652082 | 0.301473  |
| H | 4.614237  | -0.423740 | 1.796421  |
| H | 0.745331  | 0.577748  | -1.174960 |
| H | -0.621387 | 0.447295  | 1.553454  |
| H | 1.310746  | -0.849217 | 1.903186  |
| H | -2.142984 | 1.053540  | -1.807435 |
| H | -2.382451 | 2.900834  | -1.653427 |
| H | 2.752798  | 1.951309  | -1.274897 |
| H | 1.460967  | 1.658045  | 1.479901  |
| H | 3.380473  | 2.713756  | 0.190859  |
| H | 1.552416  | -2.340662 | -1.953383 |
| H | -0.080971 | -1.765581 | -1.509264 |
| H | 0.432089  | -3.417621 | -1.144943 |
| H | 4.721227  | -2.311441 | -1.994957 |
| H | -3.278561 | -1.560831 | -1.140156 |
| H | -3.521593 | -2.763881 | 0.137548  |
| H | -4.978053 | -1.176271 | 1.370906  |
| H | -4.052215 | 0.983045  | 0.509111  |
| H | -4.697864 | 0.616279  | -1.100674 |
| H | -5.798609 | 0.902341  | 0.255027  |
| H | -6.942854 | -1.338646 | -0.169960 |

$\omega$ B97XD energy = -1154.81570289 a.u.

(2R,6R,7S,8S)-1, Conf. J

|   |          |           |           |
|---|----------|-----------|-----------|
| C | 3.120148 | -2.646826 | 0.405483  |
| C | 3.381767 | -1.164585 | 0.245198  |
| C | 3.171189 | -0.393755 | -0.828971 |
| C | 2.880333 | -0.906609 | -2.212033 |
| C | 0.743186 | -1.857329 | 0.865427  |
| C | 1.598379 | -2.976483 | 0.323917  |
| C | 1.908747 | 1.529105  | 0.213535  |

|   |           |           |           |
|---|-----------|-----------|-----------|
| C | 0.498961  | 1.420547  | -0.443267 |
| C | -0.368629 | 0.353629  | 0.260678  |
| C | 0.189487  | -1.008281 | -0.007014 |
| O | 2.090185  | 2.907403  | 0.587493  |
| C | 1.010912  | 3.672735  | 0.318713  |
| C | -0.027727 | 2.827873  | -0.337997 |
| O | 0.965200  | 4.845633  | 0.584537  |
| C | -1.177770 | 3.353508  | -0.754867 |
| C | 3.115167  | 1.112798  | -0.640533 |
| C | 0.723473  | -1.680159 | 2.358678  |
| O | 3.740054  | -3.477472 | -0.569959 |
| O | -1.691919 | 0.452465  | -0.301227 |
| C | -2.710803 | 0.084008  | 0.499158  |
| O | -2.561949 | -0.274097 | 1.645955  |
| C | -4.041564 | 0.174699  | -0.204148 |
| C | -4.835936 | -1.137998 | -0.100162 |
| C | -6.227316 | -0.958870 | -0.709361 |
| C | -4.081742 | -2.290079 | -0.769311 |
| H | 3.481004  | -2.936108 | 1.402665  |
| H | 3.590829  | -0.654253 | 1.186433  |
| H | 3.651510  | -0.552381 | -2.907020 |
| H | 1.927429  | -0.508847 | -2.582396 |
| H | 1.421030  | -3.921002 | 0.849179  |
| H | 1.373287  | -3.139348 | -0.734078 |
| H | 2.856636  | -1.995705 | -2.256204 |
| H | 0.595594  | 1.138393  | -1.498166 |
| H | -0.432711 | 0.578542  | 1.327660  |
| H | 0.264866  | -1.241174 | -1.068580 |
| H | -1.931470 | 2.756933  | -1.255029 |
| H | -1.365691 | 4.410238  | -0.588547 |
| H | 3.069017  | 1.631974  | -1.604504 |
| H | 1.927216  | 0.957426  | 1.147356  |
| H | 4.009764  | 1.473990  | -0.123596 |
| H | -0.069505 | -1.007059 | 2.689472  |
| H | 1.685857  | -1.293734 | 2.720524  |
| H | 0.568008  | -2.647566 | 2.847076  |
| H | 4.681583  | -3.281643 | -0.578562 |
| H | -4.602020 | 0.985389  | 0.276029  |
| H | -3.885420 | 0.446281  | -1.252897 |
| H | -4.945620 | -1.367664 | 0.966081  |
| H | -6.814161 | -1.877345 | -0.610998 |
| H | -6.779266 | -0.151037 | -0.217659 |
| H | -6.157668 | -0.720392 | -1.777554 |
| H | -4.645817 | -3.224119 | -0.685203 |

$\omega$ B97XD energy = -1154.81559694 a.u.

(2R,6R,7S,8S)-1, Conf. K

|   |           |           |           |
|---|-----------|-----------|-----------|
| C | 3.359307  | -2.507171 | 0.360346  |
| C | 3.523293  | -1.004729 | 0.274853  |
| C | 3.296183  | -0.201361 | -0.771779 |
| C | 3.086608  | -0.668737 | -2.185413 |
| C | 0.916482  | -1.898299 | 0.755558  |
| C | 1.867486  | -2.935604 | 0.210548  |
| C | 1.856594  | 1.575835  | 0.292955  |
| C | 0.491041  | 1.397847  | -0.437271 |
| C | -0.333816 | 0.245601  | 0.179827  |

|   |           |           |           |
|---|-----------|-----------|-----------|
| C | 0.331136  | -1.062843 | -0.109225 |
| O | 1.916648  | 2.943279  | 0.739146  |
| C | 0.797922  | 3.641434  | 0.449784  |
| C | -0.138405 | 2.759654  | -0.304710 |
| O | 0.650265  | 4.792306  | 0.769524  |
| C | -1.295527 | 3.224795  | -0.771072 |
| C | 3.127275  | 1.287007  | -0.519331 |
| C | 0.832116  | -1.774764 | 2.251989  |
| O | 4.066578  | -3.247300 | -0.628692 |
| O | -1.630191 | 0.280036  | -0.448030 |
| C | -2.668457 | -0.165719 | 0.286523  |
| O | -2.556527 | -0.568353 | 1.421909  |
| C | -3.965433 | -0.048920 | -0.477101 |
| C | -5.048509 | -1.025513 | -0.007662 |
| C | -6.382522 | -0.687884 | -0.677271 |
| C | -4.644409 | -2.474981 | -0.289415 |
| H | 3.707674  | -2.817876 | 1.355489  |
| H | 3.665801  | -0.524779 | 1.244118  |
| H | 2.119099  | -0.323601 | -2.570191 |
| H | 3.143961  | -1.753540 | -2.278393 |
| H | 1.736364  | -3.908004 | 0.697165  |
| H | 1.691203  | -3.075573 | -0.859839 |
| H | 3.851292  | -0.228388 | -2.836986 |
| H | 0.656486  | 1.166815  | -1.495844 |
| H | -0.465966 | 0.422379  | 1.249512  |
| H | 0.458761  | -1.254047 | -1.174077 |
| H | -1.971073 | 2.602153  | -1.345683 |
| H | -1.567111 | 4.257699  | -0.573535 |
| H | 3.088755  | 1.847757  | -1.460128 |
| H | 1.876438  | 0.962124  | 1.199785  |
| H | 3.969748  | 1.682311  | 0.056830  |
| H | 1.755361  | -1.345486 | 2.663687  |
| H | 0.716670  | -2.765924 | 2.702679  |
| H | -0.011293 | -1.161940 | 2.575157  |
| H | 4.992440  | -2.989443 | -0.593911 |
| H | -4.306328 | 0.986705  | -0.343172 |
| H | -3.760935 | -0.173803 | -1.546283 |
| H | -5.157336 | -0.902718 | 1.075918  |
| H | -7.170820 | -1.364779 | -0.333890 |
| H | -6.697343 | 0.337119  | -0.454349 |
| H | -6.308589 | -0.789114 | -1.766959 |
| H | -5.417926 | -3.167729 | 0.056289  |

ωB97XD energy = -1154.81552727 a.u.

(2R,6R,7S,8S)-1, Conf. L

|   |           |           |           |
|---|-----------|-----------|-----------|
| C | 2.683570  | -2.984512 | -0.316530 |
| C | 3.024485  | -1.547382 | -0.625224 |
| C | 3.456200  | -0.623972 | 0.238843  |
| C | 3.874063  | -0.934534 | 1.652522  |
| C | 0.391447  | -1.963359 | 0.078023  |
| C | 1.328075  | -3.088488 | 0.449766  |
| C | 2.133927  | 1.508472  | 0.460758  |
| C | 0.799021  | 1.241008  | -0.299360 |
| C | -0.216137 | 0.470837  | 0.577879  |
| C | 0.309659  | -0.905858 | 0.895131  |
| O | 2.344803  | 2.932876  | 0.448861  |

|   |           |           |           |
|---|-----------|-----------|-----------|
| C | 1.359705  | 3.605617  | -0.184936 |
| C | 0.361538  | 2.625216  | -0.699502 |
| O | 1.356676  | 4.804706  | -0.287588 |
| C | -0.689275 | 3.024350  | -1.413331 |
| C | 3.392871  | 0.842761  | -0.119784 |
| C | -0.247497 | -2.082093 | -1.280290 |
| O | 2.550998  | -3.744128 | -1.514385 |
| O | -1.455574 | 0.442479  | -0.144426 |
| C | -2.577667 | 0.274685  | 0.584165  |
| O | -2.578529 | 0.172566  | 1.788263  |
| C | -3.799977 | 0.275927  | -0.302256 |
| C | -5.012748 | -0.422769 | 0.319624  |
| C | -6.261204 | -0.154602 | -0.523635 |
| C | -4.764245 | -1.925410 | 0.473877  |
| H | 3.453875  | -3.446494 | 0.316237  |
| H | 2.709526  | -1.223007 | -1.617768 |
| H | 4.007794  | -2.004121 | 1.826398  |
| H | 3.130960  | -0.576473 | 2.376184  |
| H | 1.542244  | -3.048819 | 1.522145  |
| H | 0.907142  | -4.074239 | 0.225340  |
| H | 4.816514  | -0.430528 | 1.892025  |
| H | 0.996409  | 0.631394  | -1.188036 |
| H | -0.384807 | 1.022783  | 1.508135  |
| H | 0.815992  | -0.969100 | 1.856199  |
| H | -1.411994 | 2.319864  | -1.807795 |
| H | -0.829087 | 4.084724  | -1.602248 |
| H | 3.400684  | 0.986442  | -1.205773 |
| H | 2.031624  | 1.238089  | 1.517046  |
| H | 4.255109  | 1.379604  | 0.290444  |
| H | 0.490604  | -2.416363 | -2.016270 |
| H | -0.713080 | -1.157012 | -1.617882 |
| H | -1.022478 | -2.857826 | -1.248801 |
| H | 3.380742  | -3.700599 | -1.998910 |
| H | -4.029944 | 1.330681  | -0.505146 |
| H | -3.538964 | -0.175277 | -1.266565 |
| H | -5.163109 | 0.005177  | 1.317401  |
| H | -6.461007 | 0.918074  | -0.617278 |
| H | -6.145785 | -0.565668 | -1.534094 |
| H | -7.141970 | -0.622989 | -0.073793 |
| H | -5.627022 | -2.414976 | 0.936204  |

ωB97XD energy = -1154.81544160 a.u.

(2R,6R,7S,8S)-1, Conf. M

|   |           |           |           |
|---|-----------|-----------|-----------|
| C | 2.988898  | -2.820714 | -0.356643 |
| C | 3.231264  | -1.412210 | -0.810917 |
| C | 3.389458  | -0.359695 | -0.000470 |
| C | 3.649310  | -0.475498 | 1.483834  |
| C | 0.668736  | -2.038253 | 0.333025  |
| C | 1.460938  | -3.111612 | -0.379498 |
| C | 1.945366  | 1.708153  | 0.152634  |
| C | 0.545921  | 1.523661  | -0.507944 |
| C | -0.255621 | 0.345867  | 0.082451  |
| C | 0.306662  | -0.963347 | -0.376817 |
| O | 2.190830  | 3.128493  | 0.163963  |
| C | 1.052029  | 3.838128  | 0.015368  |
| C | -0.055944 | 2.900231  | -0.333073 |

|   |           |           |           |
|---|-----------|-----------|-----------|
| O | 1.012371  | 5.034810  | 0.136258  |
| C | -1.294790 | 3.362746  | -0.491747 |
| C | 3.173488  | 1.049248  | -0.499322 |
| C | 0.462362  | -2.226263 | 1.809148  |
| O | 3.571902  | -3.792404 | -1.214614 |
| O | -1.604102 | 0.461887  | -0.430086 |
| C | -2.588295 | -0.053554 | 0.330650  |
| O | -2.401555 | -0.547691 | 1.419422  |
| C | -3.933211 | 0.113135  | -0.335493 |
| C | -4.988953 | -0.887148 | 0.146038  |
| C | -6.363911 | -0.501432 | -0.404081 |
| C | -4.617728 | -2.317764 | -0.252910 |
| H | 3.353748  | -2.966252 | 0.668957  |
| H | 3.033259  | -1.239944 | -1.869424 |
| H | 4.238895  | 0.377148  | 1.835979  |
| H | 4.193820  | -1.386486 | 1.740704  |
| H | 1.300155  | -4.099186 | 0.065079  |
| H | 1.169408  | -3.172405 | -1.433082 |
| H | 2.715631  | -0.481147 | 2.058134  |
| H | 0.682497  | 1.338994  | -1.582403 |
| H | -0.298187 | 0.430870  | 1.171178  |
| H | 0.495964  | -0.986377 | -1.449893 |
| H | -2.118080 | 2.725094  | -0.784839 |
| H | -1.477286 | 4.421112  | -0.329230 |
| H | 3.073695  | 1.076682  | -1.589302 |
| H | 1.880312  | 1.405394  | 1.204617  |
| H | 4.029064  | 1.679587  | -0.229877 |
| H | 1.415357  | -2.429099 | 2.312213  |
| H | -0.175320 | -3.101351 | 1.977105  |
| H | -0.024875 | -1.375079 | 2.286115  |
| H | 4.517619  | -3.626338 | -1.264154 |
| H | -4.259068 | 1.139885  | -0.119399 |
| H | -3.799262 | 0.052016  | -1.421289 |
| H | -5.020478 | -0.832989 | 1.240293  |
| H | -7.131435 | -1.196875 | -0.050826 |
| H | -6.653919 | 0.507488  | -0.091866 |
| H | -6.369209 | -0.529816 | -1.500544 |
| H | -3.655659 | -2.614168 | 0.174442  |

ωB97XD energy = -1154.81533612 a.u.

(2R,6R,7S,8S)-1, Conf. N

|   |           |           |           |
|---|-----------|-----------|-----------|
| C | 2.180314  | -3.220649 | -0.317915 |
| C | 2.722146  | -1.852585 | -0.629842 |
| C | 3.264490  | -0.990559 | 0.233102  |
| C | 3.632314  | -1.341532 | 1.651183  |
| C | 0.059216  | -1.888953 | 0.143537  |
| C | 0.850518  | -3.121571 | 0.509607  |
| C | 2.265416  | 1.312588  | 0.424759  |
| C | 0.893244  | 1.204308  | -0.308794 |
| C | -0.193865 | 0.612313  | 0.619240  |
| C | 0.135706  | -0.822183 | 0.950208  |
| O | 2.664726  | 2.694521  | 0.365346  |
| C | 1.770319  | 3.473385  | -0.280358 |
| C | 0.640545  | 2.621268  | -0.750064 |
| O | 1.927065  | 4.658059  | -0.423662 |
| C | -0.356728 | 3.136245  | -1.466152 |

|   |           |           |           |
|---|-----------|-----------|-----------|
| C | 3.415316  | 0.464854  | -0.143367 |
| C | -0.600115 | -1.928556 | -1.209181 |
| O | 1.981125  | -3.861360 | -1.572305 |
| O | -1.455094 | 0.746897  | -0.051944 |
| C | -2.552743 | 0.773231  | 0.730435  |
| O | -2.509495 | 0.756044  | 1.938692  |
| C | -3.822335 | 0.805190  | -0.082863 |
| C | -4.764115 | -0.348780 | 0.302959  |
| C | -6.095177 | -0.213493 | -0.437376 |
| C | -4.113038 | -1.706970 | 0.028707  |
| H | 2.897669  | -3.803000 | 0.277300  |
| H | 2.489987  | -1.512338 | -1.637964 |
| H | 3.527881  | -2.408002 | 1.861197  |
| H | 3.010855  | -0.800384 | 2.375317  |
| H | 1.113610  | -3.090141 | 1.572013  |
| H | 0.277633  | -4.043156 | 0.342846  |
| H | 4.671044  | -1.057761 | 1.853525  |
| H | 0.987444  | 0.540589  | -1.175036 |
| H | -0.243166 | 1.200866  | 1.540483  |
| H | 0.645936  | -0.945123 | 1.903259  |
| H | -1.173782 | 2.525219  | -1.831080 |
| H | -0.353599 | 4.199302  | -1.689011 |
| H | 3.445510  | 0.591524  | -1.231030 |
| H | 2.141783  | 1.090723  | 1.490149  |
| H | 4.345140  | 0.878929  | 0.262334  |
| H | 0.130947  | -2.203589 | -1.977065 |
| H | -1.079914 | -0.988828 | -1.477538 |
| H | -1.364971 | -2.714432 | -1.218858 |
| H | 1.681919  | -4.762086 | -1.421421 |
| H | -4.313116 | 1.764226  | 0.117636  |
| H | -3.581833 | 0.763837  | -1.150071 |
| H | -4.950125 | -0.265696 | 1.380052  |
| H | -6.573069 | 0.749772  | -0.231324 |
| H | -5.949083 | -0.293373 | -1.521393 |
| H | -6.789255 | -1.004307 | -0.136244 |
| H | -4.780828 | -2.521913 | 0.324819  |

ωB97XD energy = -1154.81529758 a.u.

(2R,6R,7S,8S)-1, Conf. O

|   |           |           |           |
|---|-----------|-----------|-----------|
| C | 3.627966  | -2.205509 | -0.234672 |
| C | 3.463096  | -0.749574 | -0.594672 |
| C | 3.575515  | 0.299285  | 0.225702  |
| C | 4.095477  | 0.204456  | 1.636316  |
| C | 1.127606  | -1.997756 | 0.154338  |
| C | 2.386874  | -2.730958 | 0.551643  |
| C | 1.612465  | 1.867298  | 0.403771  |
| C | 0.440381  | 1.147434  | -0.330669 |
| C | -0.258406 | 0.110254  | 0.580542  |
| C | 0.697550  | -0.999501 | 0.936033  |
| O | 1.333079  | 3.278872  | 0.355655  |
| C | 0.176999  | 3.565488  | -0.281402 |
| C | -0.436190 | 2.294009  | -0.760615 |
| O | -0.228459 | 4.691004  | -0.412530 |
| C | -1.562504 | 2.300934  | -1.470859 |
| C | 3.017995  | 1.644615  | -0.179838 |
| C | 0.565253  | -2.368796 | -1.192386 |

|   |           |           |           |
|---|-----------|-----------|-----------|
| O | 3.756554  | -3.007302 | -1.405177 |
| O | -1.415813 | -0.350442 | -0.131374 |
| C | -2.437677 | -0.827831 | 0.606859  |
| O | -2.431325 | -0.852985 | 1.815206  |
| C | -3.555846 | -1.333012 | -0.272593 |
| C | -4.947740 | -1.086948 | 0.320970  |
| C | -5.244758 | 0.411660  | 0.418538  |
| C | -6.011367 | -1.805154 | -0.511777 |
| H | 4.509787  | -2.358866 | 0.402344  |
| H | 3.039181  | -0.588700 | -1.586572 |
| H | 4.566178  | -0.757813 | 1.847283  |
| H | 3.289575  | 0.341032  | 2.368502  |
| H | 2.576321  | -2.584458 | 1.619389  |
| H | 2.319901  | -3.807870 | 0.364351  |
| H | 4.831889  | 0.992594  | 1.826987  |
| H | 0.826502  | 0.610508  | -1.204008 |
| H | -0.605492 | 0.604347  | 1.493573  |
| H | 1.197640  | -0.854063 | 1.891602  |
| H | -2.009770 | 1.387520  | -1.844337 |
| H | -2.048691 | 3.249167  | -1.680920 |
| H | 2.968283  | 1.742122  | -1.269851 |
| H | 1.613929  | 1.606888  | 1.467535  |
| H | 3.651583  | 2.455729  | 0.195180  |
| H | 1.370705  | -2.447440 | -1.929561 |
| H | -0.192652 | -1.671298 | -1.546607 |
| H | 0.107676  | -3.363825 | -1.131537 |
| H | 4.522860  | -2.705147 | -1.901779 |
| H | -3.467434 | -0.879545 | -1.265826 |
| H | -3.384384 | -2.409909 | -0.399920 |
| H | -4.950833 | -1.506398 | 1.333452  |
| H | -4.511121 | 0.928228  | 1.044788  |
| H | -5.234399 | 0.875354  | -0.575762 |
| H | -6.232890 | 0.583571  | 0.856259  |
| H | -7.005293 | -1.661701 | -0.076831 |

ωB97XD energy = -1154.81526419 a.u.

(2R,6R,7S,8S)-1, Conf. P

|   |           |           |           |
|---|-----------|-----------|-----------|
| C | 3.962415  | -1.682228 | -0.410851 |
| C | 3.591453  | -0.313736 | -0.897428 |
| C | 3.331223  | 0.733434  | -0.107095 |
| C | 3.681388  | 0.780945  | 1.362676  |
| C | 1.551468  | -1.885366 | 0.381428  |
| C | 2.681966  | -2.563566 | -0.360656 |
| C | 1.170924  | 2.030608  | 0.111447  |
| C | -0.072285 | 1.286527  | -0.466138 |
| C | -0.291701 | -0.105657 | 0.158836  |
| C | 0.753153  | -1.068415 | -0.315694 |
| O | 0.827600  | 3.431090  | 0.104877  |
| C | -0.506070 | 3.622594  | 0.026544  |
| C | -1.162730 | 2.310003  | -0.242512 |
| O | -1.014923 | 4.706807  | 0.144805  |
| C | -2.490107 | 2.228180  | -0.298468 |
| C | 2.526189  | 1.908030  | -0.607888 |
| C | 1.498300  | -2.110292 | 1.865629  |
| O | 4.858055  | -2.363972 | -1.278595 |
| O | -1.579840 | -0.583371 | -0.305605 |

|   |           |           |           |
|---|-----------|-----------|-----------|
| C | -2.159729 | -1.547755 | 0.439390  |
| O | -1.731866 | -1.902701 | 1.514333  |
| C | -3.382674 | -2.122463 | -0.231984 |
| C | -4.494803 | -1.099136 | -0.519337 |
| C | -5.673504 | -1.794252 | -1.204416 |
| C | -4.943207 | -0.388980 | 0.760189  |
| H | 4.390929  | -1.632087 | 0.599149  |
| H | 3.294897  | -0.272168 | -1.946078 |
| H | 4.582331  | 0.208286  | 1.593054  |
| H | 2.872539  | 0.382188  | 1.985805  |
| H | 2.949375  | -3.521469 | 0.097123  |
| H | 2.398594  | -2.761567 | -1.399505 |
| H | 3.853608  | 1.814399  | 1.680313  |
| H | 0.065319  | 1.155777  | -1.548440 |
| H | -0.332358 | -0.023726 | 1.247962  |
| H | 0.895686  | -1.031698 | -1.395625 |
| H | -3.001747 | 1.303220  | -0.522420 |
| H | -3.073981 | 3.125937  | -0.117047 |
| H | 2.368295  | 1.850142  | -1.689779 |
| H | 1.287204  | 1.754063  | 1.166261  |
| H | 3.057154  | 2.844680  | -0.401787 |
| H | 1.253283  | -3.159771 | 2.063141  |
| H | 0.742783  | -1.503767 | 2.365695  |
| H | 2.477384  | -1.922719 | 2.322421  |
| H | 5.649959  | -1.828229 | -1.380163 |
| H | -3.059533 | -2.585646 | -1.171519 |
| H | -3.758577 | -2.911507 | 0.425419  |
| H | -4.093875 | -0.354757 | -1.218752 |
| H | -6.460040 | -1.073685 | -1.448569 |
| H | -5.364229 | -2.284630 | -2.133061 |
| H | -6.108881 | -2.556385 | -0.547609 |
| H | -5.722166 | 0.348397  | 0.542964  |

ωB97XD energy = -1154.81517990 a.u.

(2R,6R,7S,8S)-1, Conf. Q

|   |           |           |           |
|---|-----------|-----------|-----------|
| C | 1.917481  | -3.360034 | -0.286661 |
| C | 2.496725  | -2.086446 | -0.826633 |
| C | 2.984391  | -1.090270 | -0.078402 |
| C | 3.304868  | -1.227458 | 1.392175  |
| C | -0.040193 | -1.956013 | 0.530588  |
| C | 0.371156  | -3.219150 | -0.192218 |
| C | 2.186781  | 1.305687  | 0.074265  |
| C | 0.733176  | 1.494726  | -0.453264 |
| C | -0.299182 | 0.587296  | 0.242465  |
| C | -0.140328 | -0.836086 | -0.194796 |
| O | 2.810334  | 2.601329  | -0.032579 |
| C | 1.896691  | 3.593025  | -0.108679 |
| C | 0.543750  | 2.985201  | -0.276797 |
| O | 2.197095  | 4.757325  | -0.061574 |
| C | -0.539013 | 3.760385  | -0.293801 |
| C | 3.121395  | 0.308068  | -0.631296 |
| C | -0.187294 | -2.053755 | 2.022253  |
| O | 2.145482  | -4.480898 | -1.129764 |
| O | -1.603515 | 1.039824  | -0.189660 |
| C | -2.641683 | 0.750970  | 0.621174  |
| O | -2.509196 | 0.274080  | 1.726326  |



|   |           |           |           |
|---|-----------|-----------|-----------|
| C | -3.961271 | 1.059753  | -0.036792 |
| C | -4.601955 | -0.196432 | -0.678719 |
| C | -3.694337 | -0.824101 | -1.740348 |
| C | -5.021825 | -1.228524 | 0.370293  |
| H | 2.307524  | -3.566783 | 0.718917  |
| H | 2.278942  | -1.901465 | -1.879106 |
| H | 4.112326  | -0.543511 | 1.672867  |
| H | 3.618674  | -2.239614 | 1.655816  |
| H | -0.019065 | -4.115563 | 0.300590  |
| H | -0.007977 | -3.216455 | -1.219531 |
| H | 2.440056  | -0.979980 | 2.018888  |
| H | 0.715443  | 1.269167  | -1.528899 |
| H | -0.235739 | 0.709090  | 1.326839  |
| H | -0.038557 | -0.932644 | -1.275603 |
| H | -1.533717 | 3.362529  | -0.442276 |
| H | -0.411819 | 4.830523  | -0.158391 |
| H | 2.938974  | 0.330320  | -1.710707 |
| H | 2.143930  | 1.077688  | 1.146260  |
| H | 4.137738  | 0.682167  | -0.460851 |
| H | 0.692273  | -2.533062 | 2.468399  |
| H | -1.048397 | -2.687982 | 2.261441  |
| H | -0.355057 | -1.088849 | 2.501834  |
| H | 3.093720  | -4.580282 | -1.253634 |
| H | -4.630240 | 1.455064  | 0.732441  |
| H | -3.811538 | 1.823353  | -0.805393 |
| H | -5.508838 | 0.167129  | -1.178310 |
| H | -4.223091 | -1.623880 | -2.268281 |
| H | -3.366454 | -0.085581 | -2.478773 |
| H | -2.798976 | -1.262235 | -1.284989 |
| H | -5.533837 | -2.069157 | -0.108823 |

ωB97XD energy = -1154.81516715 a.u.

(2R,6R,7S,8S)-1, Conf. R

|   |           |           |           |
|---|-----------|-----------|-----------|
| C | 2.227574  | -3.139911 | -0.320868 |
| C | 2.613970  | -1.813612 | -0.903579 |
| C | 3.038296  | -0.761105 | -0.195175 |
| C | 3.481253  | -0.848056 | 1.247340  |
| C | 0.181512  | -1.965766 | 0.632455  |
| C | 0.686266  | -3.179902 | -0.114712 |
| C | 1.982709  | 1.527408  | 0.016887  |
| C | 0.483078  | 1.545491  | -0.402138 |
| C | -0.385758 | 0.529380  | 0.361968  |
| C | -0.089608 | -0.869123 | -0.084709 |
| O | 2.443484  | 2.885474  | -0.132535 |
| C | 1.418807  | 3.765386  | -0.137377 |
| C | 0.136134  | 3.004959  | -0.207418 |
| O | 1.586074  | 4.956736  | -0.108358 |
| C | -1.027379 | 3.649497  | -0.143873 |
| C | 2.970954  | 0.638834  | -0.757447 |
| C | 0.139240  | -2.067912 | 2.130261  |
| O | 2.524134  | -4.235298 | -1.176217 |
| O | -1.758637 | 0.823898  | 0.013423  |
| C | -2.706880 | 0.373077  | 0.859754  |
| O | -2.457738 | -0.099359 | 1.945872  |
| C | -4.086324 | 0.500181  | 0.266941  |
| C | -4.424051 | -0.646631 | -0.719444 |

|   |           |           |           |
|---|-----------|-----------|-----------|
| C | -3.667187 | -0.533536 | -2.045341 |
| C | -4.215553 | -2.023080 | -0.081857 |
| H | 2.709592  | -3.290332 | 0.654593  |
| H | 2.298215  | -1.664167 | -1.936632 |
| H | 3.940155  | -1.810995 | 1.481197  |
| H | 2.641762  | -0.710272 | 1.938843  |
| H | 0.441811  | -4.109991 | 0.408635  |
| H | 0.236194  | -3.235028 | -1.111389 |
| H | 4.215143  | -0.066933 | 1.470521  |
| H | 0.412487  | 1.314399  | -1.474415 |
| H | -0.266474 | 0.666857  | 1.439967  |
| H | -0.041449 | -0.960577 | -1.169848 |
| H | -1.978122 | 3.139835  | -0.222595 |
| H | -1.015280 | 4.728000  | -0.014850 |
| H | 2.708979  | 0.630054  | -1.820502 |
| H | 2.046523  | 1.302315  | 1.088473  |
| H | 3.947335  | 1.128386  | -0.662551 |
| H | -0.628362 | -2.793038 | 2.422664  |
| H | -0.107631 | -1.124314 | 2.617635  |
| H | 1.093333  | -2.441453 | 2.521527  |
| H | 3.465692  | -4.223362 | -1.370465 |
| H | -4.791331 | 0.481861  | 1.101184  |
| H | -4.175897 | 1.461518  | -0.249295 |
| H | -5.493673 | -0.529375 | -0.934833 |
| H | -4.025368 | -1.290583 | -2.750252 |
| H | -3.806019 | 0.450453  | -2.504913 |
| H | -2.593584 | -0.687352 | -1.902053 |
| H | -4.584469 | -2.809995 | -0.746934 |

ωB97XD energy = -1154.81504613 a.u.

(2R,6R,7S,8S)-1, Conf. S

|   |           |           |           |
|---|-----------|-----------|-----------|
| C | 2.460063  | -3.057276 | -0.196744 |
| C | 2.885826  | -1.640134 | -0.493024 |
| C | 3.287340  | -0.723114 | 0.392089  |
| C | 3.585691  | -1.032277 | 1.836004  |
| C | 0.197660  | -1.926873 | 0.050403  |
| C | 1.052736  | -3.096106 | 0.477457  |
| C | 2.045638  | 1.464533  | 0.498616  |
| C | 0.745881  | 1.222148  | -0.328676 |
| C | -0.342528 | 0.526678  | 0.525224  |
| C | 0.088800  | -0.876337 | 0.874771  |
| O | 2.307986  | 2.879657  | 0.462337  |
| C | 1.389343  | 3.567220  | -0.250955 |
| C | 0.389001  | 2.606912  | -0.798104 |
| O | 1.438699  | 4.761583  | -0.389482 |
| C | -0.595891 | 3.017762  | -1.594282 |
| C | 3.310697  | 0.739002  | 0.011747  |
| C | -0.321850 | -1.991459 | -1.360054 |
| O | 2.373656  | -3.822445 | -1.394959 |
| O | -1.572631 | 0.562307  | -0.213948 |
| C | -2.708940 | 0.690426  | 0.505383  |
| O | -2.723234 | 0.787832  | 1.711048  |
| C | -3.931134 | 0.675965  | -0.377727 |
| C | -4.716491 | -0.654226 | -0.287509 |
| C | -3.836520 | -1.848813 | -0.663690 |
| C | -5.372804 | -0.854080 | 1.080265  |

|   |           |           |           |
|---|-----------|-----------|-----------|
| H | 3.165015  | -3.545684 | 0.490264  |
| H | 2.666565  | -1.315904 | -1.510718 |
| H | 4.513222  | -0.540917 | 2.148483  |
| H | 3.690241  | -2.103175 | 2.022508  |
| H | 1.196381  | -3.068605 | 1.561920  |
| H | 0.601612  | -4.060204 | 0.220256  |
| H | 2.792731  | -0.661384 | 2.497355  |
| H | 0.967025  | 0.574926  | -1.184045 |
| H | -0.497374 | 1.099468  | 1.444024  |
| H | 0.510047  | -0.972059 | 1.873608  |
| H | -1.315341 | 2.325367  | -2.015479 |
| H | -0.685225 | 4.075116  | -1.825729 |
| H | 3.396247  | 0.864878  | -1.073131 |
| H | 1.873811  | 1.227132  | 1.553845  |
| H | 4.166077  | 1.246584  | 0.470918  |
| H | 0.491103  | -2.224674 | -2.055676 |
| H | -0.826684 | -1.077488 | -1.670174 |
| H | -1.037385 | -2.817627 | -1.444602 |
| H | 3.236428  | -3.825228 | -1.820212 |
| H | -4.574619 | 1.500137  | -0.055587 |
| H | -3.627798 | 0.852749  | -1.413161 |
| H | -5.514015 | -0.571361 | -1.036981 |
| H | -4.426638 | -2.770143 | -0.688059 |
| H | -3.376301 | -1.712748 | -1.647574 |
| H | -3.029994 | -1.989539 | 0.066102  |
| H | -5.974277 | -1.768945 | 1.080533  |

ωB97XD energy = -1154.81492423 a.u.

(2R,6R,7S,8S)-1, Conf. T

|   |           |           |           |
|---|-----------|-----------|-----------|
| C | 2.698718  | -2.850538 | 0.478595  |
| C | 3.111831  | -1.406726 | 0.289686  |
| C | 2.973201  | -0.637706 | -0.797299 |
| C | 2.619127  | -1.142496 | -2.168460 |
| C | 0.417558  | -1.814002 | 0.929204  |
| C | 1.150698  | -3.023442 | 0.403784  |
| C | 1.922981  | 1.422329  | 0.219754  |
| C | 0.504425  | 1.455163  | -0.426431 |
| C | -0.462338 | 0.491951  | 0.296520  |
| C | -0.044305 | -0.923007 | 0.045372  |
| O | 2.251450  | 2.778493  | 0.573468  |
| C | 1.255834  | 3.649638  | 0.303825  |
| C | 0.129344  | 2.911275  | -0.335789 |
| O | 1.335662  | 4.823817  | 0.555837  |
| C | -0.963554 | 3.548591  | -0.750033 |
| C | 3.073295  | 0.869592  | -0.635016 |
| C | 0.416721  | -1.613376 | 2.419679  |
| O | 3.226764  | -3.759265 | -0.481232 |
| O | -1.772225 | 0.711477  | -0.260452 |
| C | -2.815662 | 0.372911  | 0.525218  |
| O | -2.690024 | 0.009619  | 1.673511  |
| C | -4.125074 | 0.469796  | -0.213006 |
| C | -4.578667 | -0.894749 | -0.788318 |
| C | -3.567605 | -1.460089 | -1.789909 |
| C | -4.890303 | -1.910928 | 0.312963  |
| H | 3.029446  | -3.156760 | 1.481191  |
| H | 3.380771  | -0.903892 | 1.219630  |

|   |           |           |           |
|---|-----------|-----------|-----------|
| H | 1.707146  | -0.657968 | -2.537970 |
| H | 2.485748  | -2.224363 | -2.191703 |
| H | 0.879037  | -3.936011 | 0.944956  |
| H | 0.906655  | -3.179047 | -0.651163 |
| H | 3.415146  | -0.879380 | -2.875625 |
| H | 0.562254  | 1.151269  | -1.478188 |
| H | -0.496377 | 0.736231  | 1.360903  |
| H | 0.007470  | -1.174992 | -1.013276 |
| H | -1.779808 | 3.028095  | -1.236355 |
| H | -1.041457 | 4.620720  | -0.594937 |
| H | 3.074183  | 1.375369  | -1.607137 |
| H | 1.887723  | 0.864433  | 1.161341  |
| H | 4.004029  | 1.144482  | -0.128750 |
| H | 0.185811  | -2.557182 | 2.923921  |
| H | -0.319521 | -0.873700 | 2.739405  |
| H | 1.408078  | -1.299449 | 2.773587  |
| H | 4.184024  | -3.667298 | -0.489561 |
| H | -4.873874 | 0.830366  | 0.497357  |
| H | -4.028915 | 1.195141  | -1.025814 |
| H | -5.510542 | -0.684121 | -1.328359 |
| H | -3.972787 | -2.352891 | -2.276044 |
| H | -3.318330 | -0.730235 | -2.566773 |
| H | -2.636090 | -1.748116 | -1.289664 |
| H | -5.295413 | -2.829343 | -0.123773 |

ωB97XD energy = -1154.81483134 a.u.

(2R,6R,7S,8S)-1, Conf. U

|   |           |           |           |
|---|-----------|-----------|-----------|
| C | 3.993354  | -1.636834 | -0.295863 |
| C | 3.563509  | -0.257022 | -0.703583 |
| C | 3.453416  | 0.819967  | 0.083007  |
| C | 4.038193  | 0.959760  | 1.465554  |
| C | 1.553803  | -1.897444 | 0.317711  |
| C | 2.752884  | -2.570443 | -0.310017 |
| C | 1.155831  | 1.772010  | 0.272677  |
| C | 0.070052  | 1.129527  | -0.647303 |
| C | -0.359400 | -0.264539 | -0.124204 |
| C | 0.686616  | -1.272587 | -0.485013 |
| O | 0.645478  | 3.054934  | 0.684521  |
| C | -0.591885 | 3.309721  | 0.207166  |
| C | -1.014028 | 2.174611  | -0.659712 |
| O | -1.192594 | 4.319104  | 0.469807  |
| C | -2.158407 | 2.215326  | -1.337962 |
| C | 2.563596  | 1.971978  | -0.330503 |
| C | 1.526693  | -1.834389 | 1.819035  |
| O | 4.927039  | -2.220792 | -1.195684 |
| O | -1.595848 | -0.613601 | -0.773443 |
| C | -2.403443 | -1.460286 | -0.100774 |
| O | -2.138313 | -1.890265 | 0.999643  |
| C | -3.657633 | -1.775661 | -0.878887 |
| C | -4.944086 | -1.232778 | -0.214390 |
| C | -5.273090 | -1.940174 | 1.102307  |
| C | -4.884427 | 0.286154  | -0.035484 |
| H | 4.415498  | -1.627378 | 0.716914  |
| H | 3.115562  | -0.211152 | -1.696957 |
| H | 4.733658  | 1.807007  | 1.479083  |
| H | 4.582266  | 0.075737  | 1.801268  |

|   |           |           |           |
|---|-----------|-----------|-----------|
| H | 3.013584  | -3.505414 | 0.196713  |
| H | 2.550637  | -2.805741 | -1.359890 |
| H | 3.264274  | 1.184234  | 2.209077  |
| H | 0.469133  | 0.999215  | -1.659475 |
| H | -0.545168 | -0.214023 | 0.950902  |
| H | 0.811423  | -1.385017 | -1.562388 |
| H | -2.460187 | 1.409392  | -1.995975 |
| H | -2.810641 | 3.076785  | -1.227351 |
| H | 2.499258  | 2.064159  | -1.419431 |
| H | 1.245740  | 1.183969  | 1.192745  |
| H | 2.949012  | 2.919140  | 0.060878  |
| H | 1.707804  | -2.829112 | 2.239195  |
| H | 0.571764  | -1.477581 | 2.209044  |
| H | 2.324440  | -1.180278 | 2.192929  |
| H | 5.695718  | -1.645802 | -1.251497 |
| H | -3.559677 | -1.365677 | -1.887549 |
| H | -3.722635 | -2.866015 | -0.956923 |
| H | -5.750106 | -1.455844 | -0.925336 |
| H | -6.228581 | -1.578496 | 1.495981  |
| H | -5.352729 | -3.022805 | 0.960635  |
| H | -4.500178 | -1.759931 | 1.854219  |
| H | -5.826284 | 0.664198  | 0.373560  |

ωB97XD energy = -1154.81464588 a.u.

(2R,6R,7S,8S)-1, Conf. V

|   |           |           |           |
|---|-----------|-----------|-----------|
| C | -2.139297 | -3.212359 | -0.591321 |
| C | -2.799368 | -1.858220 | -0.466364 |
| C | -2.960155 | -1.032760 | 0.576091  |
| C | -2.731363 | -1.350571 | 2.031948  |
| C | 0.001484  | -1.834710 | -0.623383 |
| C | -0.712204 | -3.038206 | -1.195636 |
| C | -2.235183 | 1.144099  | -0.492434 |
| C | -0.828334 | 1.173164  | 0.169054  |
| C | 0.268659  | 0.704128  | -0.814277 |
| C | -0.015905 | -0.690227 | -1.318681 |
| O | -2.631853 | 2.516115  | -0.676972 |
| C | -1.813852 | 3.380660  | -0.034727 |
| C | -0.691357 | 2.612156  | 0.579259  |
| O | -2.016163 | 4.566519  | -0.005884 |
| C | 0.224776  | 3.198948  | 1.345857  |
| C | -3.328795 | 0.420225  | 0.305062  |
| C | 0.553245  | -2.004842 | 0.764855  |
| O | -2.010896 | -3.952242 | 0.614637  |
| O | 1.515747  | 0.804509  | -0.108926 |
| C | 2.627349  | 0.930688  | -0.865613 |
| O | 2.601698  | 1.032547  | -2.069512 |
| C | 3.870529  | 0.898335  | -0.014158 |
| C | 4.063412  | -0.452571 | 0.702441  |
| C | 4.042762  | -1.618308 | -0.288745 |
| C | 5.363103  | -0.431984 | 1.509026  |
| H | -2.713573 | -3.812731 | -1.312248 |
| H | -3.026493 | -1.444409 | -1.450984 |
| H | -3.665458 | -1.202346 | 2.587800  |
| H | -2.003893 | -0.653276 | 2.465378  |
| H | -0.818658 | -2.922329 | -2.278611 |
| H | -0.170931 | -3.971907 | -1.009751 |

|   |           |           |           |
|---|-----------|-----------|-----------|
| H | -2.373682 | -2.363714 | 2.201386  |
| H | -0.798392 | 0.508126  | 1.035329  |
| H | 0.308890  | 1.391295  | -1.665082 |
| H | -0.428018 | -0.717613 | -2.325376 |
| H | 1.035155  | 2.634930  | 1.794444  |
| H | 0.166105  | 4.268418  | 1.525495  |
| H | -3.478744 | 0.954534  | 1.250185  |
| H | -2.182007 | 0.714618  | -1.495070 |
| H | -4.264721 | 0.503162  | -0.256632 |
| H | 0.949621  | -1.078855 | 1.180337  |
| H | 1.366507  | -2.740421 | 0.743394  |
| H | -0.212490 | -2.413365 | 1.429977  |
| H | -2.891066 | -4.195142 | 0.916533  |
| H | 4.717537  | 1.102451  | -0.675014 |
| H | 3.810674  | 1.702144  | 0.728322  |
| H | 3.228852  | -0.580706 | 1.402554  |
| H | 4.194532  | -2.569450 | 0.231580  |
| H | 3.090751  | -1.679016 | -0.826644 |
| H | 4.839119  | -1.509478 | -1.034072 |
| H | 5.498180  | -1.373486 | 2.050503  |

ωB97XD energy = -1154.81432576 a.u.

(2R,6R,7S,8S)-1, Conf. W

|   |           |           |           |
|---|-----------|-----------|-----------|
| C | -4.012694 | -1.619695 | -0.421228 |
| C | -3.680780 | -0.143474 | -0.466624 |
| C | -3.307303 | 0.657169  | 0.539246  |
| C | -3.409056 | 0.307970  | 1.998075  |
| C | -1.480023 | -1.871410 | -0.538941 |
| C | -2.768580 | -2.479230 | -0.041186 |
| C | -1.259347 | 1.731623  | -0.461265 |
| C | -0.108243 | 1.217338  | 0.455593  |
| C | 0.353207  | -0.192736 | 0.020409  |
| C | -0.729923 | -1.179798 | 0.325693  |
| O | -0.813340 | 2.974167  | -1.034615 |
| C | 0.432059  | 3.318292  | -0.642331 |
| C | 0.932717  | 2.295635  | 0.319746  |
| O | 0.984796  | 4.312501  | -1.035736 |
| C | 2.101059  | 2.441772  | 0.940016  |
| C | -2.623849 | 1.971528  | 0.201044  |
| C | -1.218732 | -1.950344 | -2.018055 |
| O | -5.023397 | -1.982627 | 0.512944  |
| O | 1.537679  | -0.506401 | 0.778565  |
| C | 2.369362  | -1.414892 | 0.227939  |
| O | 2.172072  | -1.916476 | -0.856606 |
| C | 3.556000  | -1.706599 | 1.113954  |
| C | 4.901957  | -1.235115 | 0.516569  |
| C | 5.296447  | -2.011813 | -0.741910 |
| C | 4.907442  | 0.274868  | 0.266918  |
| H | -4.336478 | -1.912625 | -1.430014 |
| H | -3.556564 | 0.245859  | -1.478235 |
| H | -3.845010 | -0.678407 | 2.158198  |
| H | -4.034766 | 1.047478  | 2.512466  |
| H | -2.918658 | -3.492441 | -0.429245 |
| H | -2.754396 | -2.542022 | 1.050856  |
| H | -2.424040 | 0.349758  | 2.478624  |
| H | -0.448558 | 1.155675  | 1.495358  |

|   |           |           |           |
|---|-----------|-----------|-----------|
| H | 0.618970  | -0.179443 | -1.039396 |
| H | -1.008125 | -1.201211 | 1.378942  |
| H | 2.453922  | 1.716961  | 1.663755  |
| H | 2.719663  | 3.305643  | 0.714653  |
| H | -2.488573 | 2.591637  | 1.094382  |
| H | -1.397880 | 1.044077  | -1.301577 |
| H | -3.224358 | 2.552362  | -0.506194 |
| H | -0.183243 | -1.713589 | -2.268870 |
| H | -1.880888 | -1.272999 | -2.573807 |
| H | -1.426847 | -2.962500 | -2.379802 |
| H | -5.806458 | -1.454938 | 0.330487  |
| H | 3.396777  | -1.235351 | 2.087435  |
| H | 3.586030  | -2.791557 | 1.259149  |
| H | 5.650323  | -1.449937 | 1.290320  |
| H | 6.298486  | -1.715514 | -1.068601 |
| H | 5.305115  | -3.090540 | -0.555697 |
| H | 4.596859  | -1.823485 | -1.560523 |
| H | 5.883526  | 0.601201  | -0.104772 |

$\omega$ B97XD energy = -1154.81425653 a.u.

(2S,6R,7S,8S)-1, Conf. A

|   |           |           |           |
|---|-----------|-----------|-----------|
| C | -2.599239 | -2.833224 | -0.069081 |
| C | -3.048060 | -1.401819 | -0.166327 |
| C | -3.065471 | -0.478431 | 0.803399  |
| C | -2.898580 | -0.755831 | 2.274562  |
| C | -0.295347 | -1.881912 | -0.398037 |
| C | -1.237705 | -2.992974 | -0.797746 |
| C | -1.998146 | 1.440192  | -0.455206 |
| C | -0.579676 | 1.251213  | 0.153366  |
| C | 0.370152  | 0.545354  | -0.843137 |
| C | -0.159533 | -0.822042 | -1.204882 |
| O | -2.143261 | 2.846320  | -0.727854 |
| C | -1.163825 | 3.585445  | -0.157573 |
| C | -0.176063 | 2.662328  | 0.474513  |
| O | -1.151080 | 4.787796  | -0.196026 |
| C | 0.852528  | 3.114728  | 1.187741  |
| C | -3.164828 | 0.994184  | 0.438037  |
| C | 0.288144  | -1.997866 | 0.984689  |
| O | -3.491129 | -3.733779 | -0.712379 |
| O | 1.662274  | 0.507007  | -0.218860 |
| C | 2.727617  | 0.405704  | -1.043679 |
| O | 2.633033  | 0.388011  | -2.247900 |
| C | 4.013670  | 0.315741  | -0.261874 |
| C | 4.047486  | -0.866544 | 0.723006  |
| C | 3.787299  | -2.193378 | 0.005857  |
| C | 5.385596  | -0.889621 | 1.464156  |
| H | -2.473130 | -3.128400 | 0.980476  |
| H | -3.210553 | -1.073832 | -1.194502 |
| H | -2.845057 | -1.819399 | 2.513656  |
| H | -1.997829 | -0.270135 | 2.669836  |
| H | -1.441937 | -2.958949 | -1.872489 |
| H | -0.834979 | -3.984914 | -0.566072 |
| H | -3.745887 | -0.329436 | 2.823916  |
| H | -0.627245 | 0.636461  | 1.055902  |
| H | 0.455168  | 1.148417  | -1.752266 |

|   |           |           |           |
|---|-----------|-----------|-----------|
| H | -0.620633 | -0.874185 | -2.188396 |
| H | 1.563370  | 2.437906  | 1.649150  |
| H | 0.992072  | 4.184696  | 1.310115  |
| H | -3.161374 | 1.611703  | 1.343860  |
| H | -2.076184 | 0.941289  | -1.423285 |
| H | -4.097448 | 1.214673  | -0.091541 |
| H | 0.853912  | -2.932932 | 1.069194  |
| H | -0.506884 | -2.044252 | 1.737619  |
| H | 0.957273  | -1.174730 | 1.233162  |
| H | -4.364071 | -3.629283 | -0.322820 |
| H | 4.824111  | 0.230670  | -0.991190 |
| H | 4.146797  | 1.256970  | 0.284612  |
| H | 3.250831  | -0.709900 | 1.460887  |
| H | 3.804641  | -3.025580 | 0.716804  |
| H | 2.814262  | -2.201337 | -0.496818 |
| H | 4.555784  | -2.380371 | -0.752979 |
| H | 5.407815  | -1.696852 | 2.202758  |
| H | 5.568398  | 0.053843  | 1.989032  |
| H | 6.213983  | -1.052465 | 0.764822  |

$\omega$ B97XD energy = -1154.81819502 a.u.

(2S,6R,7S,8S)-1, Conf. B

|   |           |           |           |
|---|-----------|-----------|-----------|
| C | -2.433624 | -2.989971 | -0.113513 |
| C | -2.977049 | -1.596954 | -0.266502 |
| C | -3.135444 | -0.668425 | 0.685381  |
| C | -3.062130 | -0.920240 | 2.168807  |
| C | -0.188471 | -1.873850 | -0.282547 |
| C | -1.013358 | -3.055140 | -0.736904 |
| C | -2.118305 | 1.306551  | -0.524379 |
| C | -0.739573 | 1.240565  | 0.191975  |
| C | 0.334656  | 0.590972  | -0.712548 |
| C | -0.064222 | -0.815521 | -1.093303 |
| O | -2.347577 | 2.690696  | -0.845839 |
| C | -1.469399 | 3.515470  | -0.230200 |
| C | -0.468575 | 2.685876  | 0.502944  |
| O | -1.541366 | 4.713965  | -0.306168 |
| C | 0.462886  | 3.231301  | 1.281449  |
| C | -3.311284 | 0.789983  | 0.292331  |
| C | 0.287204  | -1.931930 | 1.144556  |
| O | -3.206015 | -3.960718 | -0.807669 |
| O | 1.571654  | 0.650149  | 0.016270  |
| C | 2.703026  | 0.606652  | -0.718095 |
| O | 2.709186  | 0.568008  | -1.926355 |
| C | 3.936803  | 0.576656  | 0.147097  |
| C | 4.697707  | -0.753334 | -0.015521 |
| C | 5.993617  | -0.718096 | 0.795430  |
| C | 3.823873  | -1.944157 | 0.386616  |
| H | -2.364877 | -3.264685 | 0.946762  |
| H | -3.084144 | -1.292260 | -1.309006 |
| H | -2.221970 | -0.378876 | 2.621346  |
| H | -2.964613 | -1.976391 | 2.426289  |
| H | -1.139036 | -3.045383 | -1.824190 |
| H | -0.557887 | -4.012571 | -0.461905 |
| H | -3.970656 | -0.539010 | 2.649013  |
| H | -0.808411 | 0.645139  | 1.106151  |
| H | 0.453081  | 1.188168  | -1.621759 |

|   |           |           |           |
|---|-----------|-----------|-----------|
| H | -0.440186 | -0.911279 | -2.109379 |
| H | 1.181021  | 2.621720  | 1.818777  |
| H | 0.513219  | 4.311384  | 1.382999  |
| H | -3.413786 | 1.415248  | 1.186804  |
| H | -2.085150 | 0.782238  | -1.481488 |
| H | -4.217524 | 0.939472  | -0.303650 |
| H | 0.882027  | -1.064680 | 1.429294  |
| H | 0.901765  | -2.827598 | 1.291426  |
| H | -0.562183 | -2.018729 | 1.831856  |
| H | -4.111102 | -3.917774 | -0.485648 |
| H | 4.578255  | 1.406017  | -0.168179 |
| H | 3.662489  | 0.730298  | 1.195564  |
| H | 4.949850  | -0.854296 | -1.077786 |
| H | 6.554421  | -1.649324 | 0.668870  |
| H | 6.639156  | 0.109480  | 0.483847  |
| H | 5.782598  | -0.597668 | 1.864900  |
| H | 4.372875  | -2.883946 | 0.272756  |
| H | 2.920572  | -2.010279 | -0.229235 |
| H | 3.513110  | -1.859671 | 1.435228  |

ωB97XD energy = -1154.81769299 a.u.

(2S,6R,7S,8S)-1, Conf. C

|   |           |           |           |
|---|-----------|-----------|-----------|
| C | -4.140049 | -1.601535 | 0.141543  |
| C | -3.782781 | -0.143358 | -0.002740 |
| C | -3.297180 | 0.680602  | 0.930789  |
| C | -3.238915 | 0.356600  | 2.397891  |
| C | -1.650559 | -1.888144 | -0.381860 |
| C | -2.868885 | -2.499921 | 0.268343  |
| C | -1.361370 | 1.706020  | -0.320009 |
| C | -0.129172 | 1.170179  | 0.467312  |
| C | 0.263465  | -0.246029 | -0.012796 |
| C | -0.790073 | -1.224542 | 0.398909  |
| O | -0.955403 | 2.939221  | -0.942286 |
| C | 0.330050  | 3.262018  | -0.682655 |
| C | 0.912492  | 2.228200  | 0.220154  |
| O | 0.854773  | 4.247845  | -1.131369 |
| C | 2.148418  | 2.345874  | 0.700694  |
| C | -2.637447 | 1.976073  | 0.489685  |
| C | -1.588643 | -1.946357 | -1.881954 |
| O | -4.850530 | -2.057411 | -1.005301 |
| O | 1.510599  | -0.575887 | 0.628408  |
| C | 2.371252  | -1.336096 | -0.076831 |
| O | 2.152566  | -1.724409 | -1.201947 |
| C | 3.631702  | -1.629603 | 0.698309  |
| C | 4.897006  | -1.273398 | -0.099423 |
| C | 4.969990  | 0.230590  | -0.374913 |
| C | 6.141194  | -1.758197 | 0.646342  |
| H | -4.752351 | -1.773419 | 1.037797  |
| H | -3.759680 | 0.189647  | -1.041836 |
| H | -3.734667 | 1.142800  | 2.978838  |
| H | -2.200820 | 0.313765  | 2.749916  |
| H | -3.125417 | -3.470376 | -0.168375 |
| H | -2.669521 | -2.652038 | 1.333627  |
| H | -3.714000 | -0.596527 | 2.640148  |
| H | -0.356258 | 1.112181  | 1.537851  |
| H | 0.427145  | -0.235391 | -1.092362 |

|   |           |           |           |
|---|-----------|-----------|-----------|
| H | -0.937717 | -1.268153 | 1.478282  |
| H | 2.568104  | 1.612561  | 1.379243  |
| H | 2.755332  | 3.196779  | 0.405066  |
| H | -2.390677 | 2.609590  | 1.349494  |
| H | -1.606313 | 1.021178  | -1.137924 |
| H | -3.308211 | 2.554457  | -0.153603 |
| H | -0.650931 | -1.559498 | -2.284275 |
| H | -2.428511 | -1.399306 | -2.326207 |
| H | -1.694480 | -2.984850 | -2.212093 |
| H | -5.642265 | -1.521457 | -1.111001 |
| H | 3.612514  | -1.094964 | 1.653284  |
| H | 3.624213  | -2.703952 | 0.916759  |
| H | 4.834902  | -1.798462 | -1.059575 |
| H | 5.863209  | 0.476222  | -0.957390 |
| H | 4.099818  | 0.584496  | -0.937396 |
| H | 5.019461  | 0.793815  | 0.565375  |
| H | 7.048651  | -1.530621 | 0.078406  |
| H | 6.111007  | -2.839841 | 0.813888  |
| H | 6.228462  | -1.267348 | 1.623299  |

ωB97XD energy = -1154.81751408 a.u.

(2S,6R,7S,8S)-1, Conf. D

|   |           |           |           |
|---|-----------|-----------|-----------|
| C | -2.938403 | -2.788794 | 0.127469  |
| C | -3.262663 | -1.316673 | 0.186810  |
| C | -3.002674 | -0.459357 | 1.178495  |
| C | -2.543857 | -0.864606 | 2.552041  |
| C | -0.690870 | -1.895273 | -0.705563 |
| C | -1.404479 | -3.036895 | -0.021417 |
| C | -1.944953 | 1.447814  | -0.098556 |
| C | -0.478352 | 1.443881  | 0.427659  |
| C | 0.378010  | 0.386528  | -0.303438 |
| C | -0.084211 | -0.987368 | 0.067458  |
| O | -2.229872 | 2.790486  | -0.531744 |
| C | -1.174690 | 3.622359  | -0.398315 |
| C | -0.040372 | 2.868434  | 0.208779  |
| O | -1.215434 | 4.779324  | -0.727206 |
| C | 1.110941  | 3.471586  | 0.496981  |
| C | -3.044704 | 1.030490  | 0.888332  |
| C | -0.862683 | -1.780233 | -2.193566 |
| O | -3.561939 | -3.392922 | -1.000961 |
| O | 1.733800  | 0.567179  | 0.148970  |
| C | 2.707345  | 0.171374  | -0.695211 |
| O | 2.495760  | -0.233947 | -1.815525 |
| C | 4.070607  | 0.263476  | -0.060070 |
| C | 4.687188  | -1.135511 | 0.137010  |
| C | 6.094950  | -1.004883 | 0.719880  |
| C | 3.798933  | -2.014672 | 1.021972  |
| H | -3.266510 | -3.304814 | 1.040689  |
| H | -3.574619 | -0.907266 | -0.775541 |
| H | -1.557133 | -0.440927 | 2.774884  |
| H | -2.480192 | -1.947469 | 2.678706  |
| H | -1.289524 | -3.981531 | -0.562543 |
| H | -0.985599 | -3.170840 | 0.980920  |
| H | -3.231756 | -0.472499 | 3.310184  |
| H | -0.460925 | 1.210616  | 1.498689  |
| H | 0.345616  | 0.566236  | -1.380513 |

|   |           |           |           |
|---|-----------|-----------|-----------|
| H | -0.016961 | -1.184192 | 1.137614  |
| H | 1.935367  | 2.940630  | 0.957928  |
| H | 1.229195  | 4.525776  | 0.263931  |
| H | -2.942762 | 1.616672  | 1.808794  |
| H | -2.019538 | 0.818168  | -0.991394 |
| H | -4.000770 | 1.309004  | 0.433924  |
| H | -0.639055 | -2.741168 | -2.667077 |
| H | -0.208804 | -1.025749 | -2.634159 |
| H | -1.905340 | -1.552052 | -2.445325 |
| H | -4.512434 | -3.260102 | -0.937055 |
| H | 4.707089  | 0.854824  | -0.726062 |
| H | 3.996960  | 0.779789  | 0.902195  |
| H | 4.758486  | -1.601450 | -0.853065 |
| H | 6.563147  | -1.987883 | 0.831135  |
| H | 6.739083  | -0.395000 | 0.078053  |
| H | 6.063647  | -0.535652 | 1.710587  |
| H | 4.254790  | -2.998897 | 1.167981  |
| H | 2.809232  | -2.168407 | 0.578789  |
| H | 3.660414  | -1.556851 | 2.008979  |

ωB97XD energy = -1154.81738519 a.u.

(2S,6R,7S,8S)-1, Conf. E

|   |           |           |           |
|---|-----------|-----------|-----------|
| C | -3.900861 | -1.735566 | 0.012603  |
| C | -3.649108 | -0.274420 | -0.232479 |
| C | -3.298897 | 0.658960  | 0.661546  |
| C | -3.346191 | 0.493029  | 2.157920  |
| C | -1.400130 | -1.955412 | -0.147370 |
| C | -2.719654 | -2.562645 | -0.562586 |
| C | -1.410392 | 1.756286  | -0.614697 |
| C | -0.270479 | 1.026782  | 0.150492  |
| C | 0.314733  | -0.137502 | -0.684399 |
| C | -0.754720 | -1.154063 | -1.003652 |
| O | -0.887389 | 3.040739  | -1.002816 |
| C | 0.291351  | 3.321120  | -0.400994 |
| C | 0.710406  | 2.136239  | 0.403286  |
| O | 0.856004  | 4.374753  | -0.537613 |
| C | 1.784462  | 2.162570  | 1.188633  |
| C | -2.705453 | 1.974025  | 0.180833  |
| C | -1.004466 | -2.188256 | 1.286270  |
| O | -5.064652 | -2.210599 | -0.651781 |
| O | 1.406336  | -0.674831 | 0.080219  |
| C | 2.402951  | -1.259565 | -0.616326 |
| O | 2.407946  | -1.347829 | -1.822005 |
| C | 3.504623  | -1.758734 | 0.284169  |
| C | 4.855757  | -1.102190 | -0.052641 |
| C | 4.813661  | 0.408090  | 0.191581  |
| C | 5.974972  | -1.760467 | 0.755419  |
| H | -3.985100 | -1.938932 | 1.087764  |
| H | -3.592922 | -0.022217 | -1.292860 |
| H | -3.808344 | -0.442342 | 2.478248  |
| H | -3.916629 | 1.318198  | 2.599667  |
| H | -2.824627 | -2.556474 | -1.652024 |
| H | -2.827535 | -3.598586 | -0.223209 |
| H | -2.340797 | 0.544419  | 2.594267  |
| H | -0.644627 | 0.605083  | 1.086766  |
| H | 0.726287  | 0.257461  | -1.618285 |

|   |           |           |           |
|---|-----------|-----------|-----------|
| H | -1.137161 | -1.089317 | -2.019821 |
| H | 2.077704  | 1.299947  | 1.776616  |
| H | 2.390682  | 3.062300  | 1.240105  |
| H | -2.480029 | 2.624980  | 1.033562  |
| H | -1.644524 | 1.240268  | -1.548022 |
| H | -3.404925 | 2.521529  | -0.459192 |
| H | -0.888113 | -3.263671 | 1.464264  |
| H | -1.790697 | -1.841622 | 1.966835  |
| H | -0.068415 | -1.699043 | 1.553735  |
| H | -5.817388 | -1.688462 | -0.359458 |
| H | 3.242443  | -1.578774 | 1.331589  |
| H | 3.576610  | -2.841225 | 0.131653  |
| H | 5.043265  | -1.276259 | -1.118669 |
| H | 5.769241  | 0.871188  | -0.072090 |
| H | 4.033783  | 0.897361  | -0.401176 |
| H | 4.619141  | 0.622610  | 1.249789  |
| H | 6.943869  | -1.314279 | 0.510974  |
| H | 6.037882  | -2.834724 | 0.553895  |
| H | 5.809577  | -1.626977 | 1.831408  |

ωB97XD energy = -1154.81714732 a.u.

(2S,6R,7S,8S)-1, Conf. F

|   |           |           |           |
|---|-----------|-----------|-----------|
| C | -3.786211 | -1.719328 | 0.117603  |
| C | -3.567197 | -0.243791 | -0.065335 |
| C | -3.134859 | 0.640376  | 0.842689  |
| C | -3.040330 | 0.390611  | 2.325146  |
| C | -1.310437 | -1.904696 | -0.285986 |
| C | -2.660465 | -2.497124 | -0.615485 |
| C | -1.372157 | 1.818109  | -0.536213 |
| C | -0.164949 | 1.059735  | 0.085532  |
| C | 0.347782  | -0.048409 | -0.865085 |
| C | -0.748056 | -1.048737 | -1.147765 |
| O | -0.890508 | 3.124480  | -0.903146 |
| C | 0.331965  | 3.386568  | -0.386616 |
| C | 0.823727  | 2.166806  | 0.318606  |
| O | 0.876482  | 4.451850  | -0.513739 |
| C | 1.951357  | 2.170892  | 1.025001  |
| C | -2.591048 | 1.983903  | 0.382894  |
| C | -0.786335 | -2.218172 | 1.090596  |
| O | -5.005689 | -2.169384 | -0.457654 |
| O | 1.498469  | -0.633347 | -0.235008 |
| C | 2.349524  | -1.297958 | -1.046865 |
| O | 2.208015  | -1.357201 | -2.245293 |
| C | 3.458713  | -1.960563 | -0.267857 |
| C | 4.171901  | -1.050846 | 0.744745  |
| C | 5.247191  | -1.844258 | 1.490195  |
| C | 4.770233  | 0.179029  | 0.058418  |
| H | -3.762370 | -1.985248 | 1.182305  |
| H | -3.615884 | 0.069386  | -1.109802 |
| H | -1.999087 | 0.428962  | 2.668683  |
| H | -3.466262 | -0.565824 | 2.633354  |
| H | -2.863929 | -2.421895 | -1.688265 |
| H | -2.733110 | -3.553821 | -0.335958 |
| H | -3.572178 | 1.183862  | 2.863296  |
| H | -0.452852 | 0.580509  | 1.024463  |
| H | 0.676132  | 0.403083  | -1.806451 |

|   |           |           |           |
|---|-----------|-----------|-----------|
| H | -1.218067 | -0.929103 | -2.121105 |
| H | 2.297397  | 1.286132  | 1.547522  |
| H | 2.548175  | 3.076686  | 1.078641  |
| H | -2.292742 | 2.590331  | 1.246071  |
| H | -1.688097 | 1.347313  | -1.469111 |
| H | -3.346981 | 2.558373  | -0.162391 |
| H | -0.654471 | -3.301458 | 1.195564  |
| H | -1.508562 | -1.916656 | 1.858064  |
| H | 0.169290  | -1.739010 | 1.301597  |
| H | -5.729830 | -1.673157 | -0.065139 |
| H | 3.016699  | -2.819286 | 0.253379  |
| H | 4.169572  | -2.350759 | -1.001937 |
| H | 3.426074  | -0.716095 | 1.476082  |
| H | 5.745948  | -1.218414 | 2.236650  |
| H | 4.820400  | -2.711065 | 2.005497  |
| H | 6.012356  | -2.208886 | 0.794870  |
| H | 5.266246  | 0.828992  | 0.786326  |
| H | 4.004567  | 0.773194  | -0.451148 |
| H | 5.515313  | -0.120211 | -0.687635 |

ωB97XD energy = -1154.81714552 a.u.

(2S,6R,7S,8S)-1, Conf. G

|   |           |           |           |
|---|-----------|-----------|-----------|
| C | -3.142891 | -2.526407 | 0.210782  |
| C | -3.306770 | -1.030878 | 0.319715  |
| C | -2.894122 | -0.229768 | 1.306650  |
| C | -2.388142 | -0.717060 | 2.635985  |
| C | -0.888557 | -1.847017 | -0.788888 |
| C | -1.658612 | -2.924771 | -0.063197 |
| C | -1.752426 | 1.593979  | -0.025139 |
| C | -0.254751 | 1.431117  | 0.372530  |
| C | 0.428304  | 0.312949  | -0.444451 |
| C | -0.139969 | -1.015347 | -0.055605 |
| O | -1.935599 | 2.970438  | -0.405603 |
| C | -0.795211 | 3.690691  | -0.344387 |
| C | 0.305024  | 2.810522  | 0.143976  |
| O | -0.747106 | 4.855744  | -0.642249 |
| C | 1.531848  | 3.288338  | 0.341657  |
| C | -2.800540 | 1.263747  | 1.047306  |
| C | -1.153155 | -1.698108 | -2.259773 |
| O | -3.910828 | -3.036451 | -0.874186 |
| O | 1.826904  | 0.347100  | -0.103983 |
| C | 2.681576  | -0.162854 | -1.015773 |
| O | 2.340932  | -0.517669 | -2.120300 |
| C | 4.083143  | -0.236925 | -0.464944 |
| C | 4.179421  | -1.050977 | 0.838835  |
| C | 3.598379  | -2.456195 | 0.660424  |
| C | 5.633887  | -1.108250 | 1.309221  |
| H | -3.450417 | -3.029101 | 1.138509  |
| H | -3.637231 | -0.568776 | -0.612077 |
| H | -1.330613 | -0.458911 | 2.772421  |
| H | -2.487603 | -1.797992 | 2.757188  |
| H | -1.682618 | -3.865307 | -0.622882 |
| H | -1.179841 | -3.119256 | 0.901669  |
| H | -2.936120 | -0.231320 | 3.451548  |
| H | -0.172090 | 1.170075  | 1.434248  |
| H | 0.325219  | 0.519917  | -1.512035 |

|   |           |           |           |
|---|-----------|-----------|-----------|
| H | -0.015347 | -1.235477 | 1.004935  |
| H | 2.333905  | 2.663148  | 0.715781  |
| H | 1.734293  | 4.332364  | 0.121301  |
| H | -2.557468 | 1.810579  | 1.965570  |
| H | -1.966268 | 1.000993  | -0.920348 |
| H | -3.757139 | 1.654309  | 0.685447  |
| H | -2.194591 | -1.405421 | -2.438492 |
| H | -1.019052 | -2.664497 | -2.756040 |
| H | -0.485340 | -0.979528 | -2.737411 |
| H | -4.834480 | -2.807692 | -0.733678 |
| H | 4.710115  | -0.680717 | -1.243377 |
| H | 4.438084  | 0.785616  | -0.287954 |
| H | 3.588320  | -0.528598 | 1.600636  |
| H | 3.692956  | -3.032022 | 1.586484  |
| H | 2.536900  | -2.426039 | 0.391627  |
| H | 4.128854  | -2.998428 | -0.131003 |
| H | 5.713417  | -1.637094 | 2.264178  |
| H | 6.053122  | -0.105520 | 1.443874  |
| H | 6.258002  | -1.639322 | 0.580896  |

ωB97XD energy = -1154.81710269 a.u.

(2S,6R,7S,8S)-1, Conf. H

|   |           |           |           |
|---|-----------|-----------|-----------|
| C | -4.101154 | -1.487646 | 0.284486  |
| C | -3.711258 | -0.032276 | 0.210385  |
| C | -3.098404 | 0.701027  | 1.144632  |
| C | -2.898776 | 0.263373  | 2.569133  |
| C | -1.684142 | -1.804621 | -0.494483 |
| C | -2.850757 | -2.421385 | 0.240397  |
| C | -1.267939 | 1.766765  | -0.230804 |
| C | 0.031374  | 1.152873  | 0.375248  |
| C | 0.317106  | -0.242659 | -0.224414 |
| C | -0.733001 | -1.206743 | 0.231640  |
| O | -0.902612 | 3.034279  | -0.807374 |
| C | 0.411944  | 3.311583  | -0.679337 |
| C | 1.066884  | 2.203702  | 0.074083  |
| O | 0.909013  | 4.316768  | -1.116636 |
| C | 2.351922  | 2.271242  | 0.413503  |
| C | -2.439607 | 2.005932  | 0.732580  |
| C | -1.769512 | -1.773383 | -1.993940 |
| O | -4.919861 | -1.844466 | -0.824102 |
| O | 1.602229  | -0.667494 | 0.273768  |
| C | 2.252234  | -1.586020 | -0.472847 |
| O | 1.851278  | -1.969843 | -1.547416 |
| C | 3.510019  | -2.071948 | 0.204261  |
| C | 4.481230  | -0.959967 | 0.632701  |
| C | 5.701393  | -1.574082 | 1.321930  |
| C | 4.896548  | -0.095634 | -0.559814 |
| H | -4.639813 | -1.706810 | 1.217219  |
| H | -3.785659 | 0.380005  | -0.797326 |
| H | -3.304134 | 1.014167  | 3.257162  |
| H | -1.831527 | 0.167436  | 2.803250  |
| H | -3.176233 | -3.361396 | -0.216614 |
| H | -2.554246 | -2.633459 | 1.272426  |
| H | -3.376625 | -0.693814 | 2.788998  |
| H | -0.076636 | 1.037160  | 1.459836  |
| H | 0.378332  | -0.168534 | -1.312435 |

|   |           |           |           |
|---|-----------|-----------|-----------|
| H | -0.775765 | -1.308043 | 1.316327  |
| H | 2.833133  | 1.489273  | 0.987727  |
| H | 2.937304  | 3.132709  | 0.105423  |
| H | -2.080244 | 2.563344  | 1.605142  |
| H | -1.620775 | 1.149298  | -1.062651 |
| H | -3.152893 | 2.651327  | 0.210113  |
| H | -2.611071 | -1.151584 | -2.321875 |
| H | -1.968766 | -2.780874 | -2.372543 |
| H | -0.850182 | -1.415319 | -2.460066 |
| H | -5.703127 | -1.286256 | -0.822285 |
| H | 3.204702  | -2.651296 | 1.084327  |
| H | 3.998626  | -2.757046 | -0.494339 |
| H | 3.962184  | -0.327540 | 1.363172  |
| H | 6.390171  | -0.794367 | 1.661735  |
| H | 5.411223  | -2.171334 | 2.192716  |
| H | 6.250705  | -2.226384 | 0.633039  |
| H | 5.585153  | 0.695117  | -0.245737 |
| H | 4.034788  | 0.382518  | -1.036919 |
| H | 5.404382  | -0.703036 | -1.317785 |

ωB97XD energy = -1154.81708961 a.u.

(2S,6R,7S,8S)-1, Conf. I

|   |           |           |           |
|---|-----------|-----------|-----------|
| C | -3.461107 | -2.454967 | 0.170815  |
| C | -3.568072 | -0.953752 | 0.070837  |
| C | -3.305631 | -0.046740 | 1.016765  |
| C | -3.078199 | -0.376764 | 2.465862  |
| C | -1.026495 | -1.962798 | -0.451382 |
| C | -1.973597 | -2.926603 | 0.223750  |
| C | -1.836547 | 1.551102  | -0.271558 |
| C | -0.459070 | 1.396857  | 0.439276  |
| C | 0.317399  | 0.174577  | -0.101846 |
| C | -0.372692 | -1.084488 | 0.317586  |
| O | -1.858954 | 2.865546  | -0.858669 |
| C | -0.719378 | 3.557563  | -0.644956 |
| C | 0.200528  | 2.725602  | 0.183104  |
| O | -0.544430 | 4.668256  | -1.074110 |
| C | 1.370473  | 3.202310  | 0.603292  |
| C | -3.089525 | 1.398740  | 0.602523  |
| C | -1.015715 | -1.966377 | -1.954060 |
| O | -4.047468 | -3.074765 | -0.969176 |
| O | 1.633881  | 0.227079  | 0.480497  |
| C | 2.647325  | -0.252707 | -0.268064 |
| O | 2.496075  | -0.721488 | -1.372613 |
| C | 3.970715  | -0.074292 | 0.436324  |
| C | 5.076054  | -1.006501 | -0.068307 |
| C | 6.423298  | -0.587077 | 0.524331  |
| C | 4.760143  | -2.467723 | 0.260085  |
| H | -3.954595 | -2.829026 | 1.078775  |
| H | -3.698870 | -0.602341 | -0.954036 |
| H | -3.248165 | -1.431973 | 2.690741  |
| H | -2.053059 | -0.130170 | 2.768545  |
| H | -1.943116 | -3.921458 | -0.231946 |
| H | -1.691348 | -3.029976 | 1.276170  |
| H | -3.744175 | 0.219852  | 3.099601  |
| H | -0.602567 | 1.254439  | 1.516486  |
| H | 0.420045  | 0.254556  | -1.186174 |

|   |           |           |           |
|---|-----------|-----------|-----------|
| H | -0.452360 | -1.191115 | 1.399529  |
| H | 2.033760  | 2.616684  | 1.228931  |
| H | 1.667415  | 4.206260  | 0.313927  |
| H | -3.000634 | 2.054431  | 1.476311  |
| H | -1.905654 | 0.845769  | -1.105787 |
| H | -3.936779 | 1.762920  | 0.012724  |
| H | -0.225447 | -1.339675 | -2.370895 |
| H | -1.984302 | -1.640876 | -2.351837 |
| H | -0.864934 | -2.987249 | -2.318971 |
| H | -4.969190 | -2.805810 | -1.026613 |
| H | 4.257182  | 0.974637  | 0.279938  |
| H | 3.815981  | -0.194676 | 1.514610  |
| H | 5.124341  | -0.901976 | -1.158282 |
| H | 7.227760  | -1.228511 | 0.151596  |
| H | 6.670927  | 0.448395  | 0.267457  |
| H | 6.412205  | -0.669683 | 1.618101  |
| H | 5.551363  | -3.128216 | -0.108153 |
| H | 3.819919  | -2.785185 | -0.199269 |
| H | 4.682031  | -2.612839 | 1.344839  |

ωB97XD energy = -1154.81676363 a.u.

(2S,6R,7S,8S)-1, Conf. J

|   |           |           |           |
|---|-----------|-----------|-----------|
| C | -2.923357 | -2.756837 | -0.032364 |
| C | -3.279644 | -1.313097 | -0.250036 |
| C | -3.317443 | -0.332995 | 0.661523  |
| C | -3.276801 | -0.530838 | 2.154234  |
| C | -0.540151 | -1.960366 | -0.170451 |
| C | -1.511103 | -3.028617 | -0.616865 |
| C | -2.033500 | 1.449280  | -0.592287 |
| C | -0.694541 | 1.240868  | 0.170673  |
| C | 0.314118  | 0.404086  | -0.652061 |
| C | -0.268989 | -0.944440 | -0.998595 |
| O | -2.079593 | 2.837136  | -0.971883 |
| C | -1.111904 | 3.568235  | -0.373782 |
| C | -0.242293 | 2.652130  | 0.421257  |
| O | -1.023097 | 4.760823  | -0.505811 |
| C | 0.736699  | 3.112579  | 1.196492  |
| C | -3.302679 | 1.117426  | 0.205660  |
| C | -0.080669 | -2.063371 | 1.259593  |
| O | -3.800508 | -3.646616 | -0.710253 |
| O | 1.504055  | 0.323787  | 0.148065  |
| C | 2.664578  | 0.105920  | -0.504938 |
| O | 2.739109  | -0.009940 | -1.705033 |
| C | 3.824573  | 0.071887  | 0.461022  |
| C | 5.061237  | -0.652118 | -0.079043 |
| C | 6.248550  | -0.430807 | 0.860681  |
| C | 4.786714  | -2.145031 | -0.277116 |
| H | -2.913749 | -2.995913 | 1.038801  |
| H | -3.345091 | -1.042160 | -1.305330 |
| H | -2.366877 | -0.097871 | 2.587986  |
| H | -3.331434 | -1.578504 | 2.455301  |
| H | -1.610419 | -3.032790 | -1.706905 |
| H | -1.197876 | -4.031765 | -0.307353 |
| H | -4.120698 | -0.005390 | 2.615926  |
| H | -0.868226 | 0.707795  | 1.109070  |
| H | 0.564318  | 0.936118  | -1.575181 |



|   |           |           |           |
|---|-----------|-----------|-----------|
| H | -0.650547 | -1.010259 | -2.015092 |
| H | 1.359771  | 2.445883  | 1.782383  |
| H | 0.921562  | 4.181672  | 1.246191  |
| H | -3.352278 | 1.790536  | 1.069461  |
| H | -2.041304 | 0.887761  | -1.528609 |
| H | -4.166355 | 1.348634  | -0.426428 |
| H | -0.938347 | -2.086199 | 1.941929  |
| H | 0.579223  | -1.248616 | 1.555196  |
| H | 0.456624  | -3.008111 | 1.403831  |
| H | -4.698476 | -3.476514 | -0.411203 |
| H | 4.064392  | 1.119643  | 0.687221  |
| H | 3.486240  | -0.376716 | 1.402443  |
| H | 5.297981  | -0.214282 | -1.055442 |
| H | 7.149534  | -0.911163 | 0.467080  |
| H | 6.465232  | 0.634682  | 0.991733  |
| H | 6.049412  | -0.858816 | 1.850818  |
| H | 5.672121  | -2.651186 | -0.674115 |
| H | 3.965004  | -2.310065 | -0.979497 |
| H | 4.530161  | -2.621288 | 0.677528  |

ωB97XD energy = -1154.81651541 a.u.

(2S,6R,7S,8S)-1, Conf. K

|   |           |           |           |
|---|-----------|-----------|-----------|
| C | -2.508892 | -2.920631 | -0.173387 |
| C | -2.976100 | -1.510872 | -0.406506 |
| C | -3.186699 | -0.554299 | 0.506754  |
| C | -3.263995 | -0.771851 | 1.995266  |
| C | -0.214069 | -1.896210 | -0.152549 |
| C | -1.039007 | -3.058095 | -0.653676 |
| C | -1.978172 | 1.354744  | -0.635971 |
| C | -0.676211 | 1.244483  | 0.207472  |
| C | 0.445536  | 0.534190  | -0.587269 |
| C | 0.028442  | -0.865724 | -0.972286 |
| O | -2.119367 | 2.742599  | -0.992572 |
| C | -1.266825 | 3.540284  | -0.308900 |
| C | -0.371474 | 2.682015  | 0.520969  |
| O | -1.281744 | 4.739468  | -0.403982 |
| C | 0.512875  | 3.200242  | 1.369902  |
| C | -3.264192 | 0.899782  | 0.068741  |
| C | 0.124511  | -1.932012 | 1.313400  |
| O | -3.250822 | -3.876098 | -0.919915 |
| O | 1.625141  | 0.564653  | 0.232384  |
| C | 2.808711  | 0.600931  | -0.419378 |
| O | 2.898600  | 0.642377  | -1.624688 |
| C | 3.974215  | 0.556011  | 0.535693  |
| C | 4.661471  | -0.830383 | 0.565668  |
| C | 3.679056  | -1.934569 | 0.963844  |
| C | 5.365410  | -1.161685 | -0.752183 |
| H | -2.556125 | -3.171771 | 0.893994  |
| H | -2.970647 | -1.227667 | -1.460516 |
| H | -2.443789 | -0.258722 | 2.512921  |
| H | -3.242874 | -1.824523 | 2.283244  |
| H | -1.058976 | -3.077291 | -1.747871 |
| H | -0.651211 | -4.023099 | -0.309510 |
| H | -4.193109 | -0.336831 | 2.381171  |
| H | -0.857120 | 0.670443  | 1.119646  |
| H | 0.658442  | 1.105260  | -1.495700 |

|   |           |           |           |
|---|-----------|-----------|-----------|
| H | -0.253028 | -0.974966 | -2.017246 |
| H | 1.154181  | 2.569216  | 1.975442  |
| H | 0.603216  | 4.278620  | 1.460851  |
| H | -3.430623 | 1.549999  | 0.935361  |
| H | -1.875895 | 0.817222  | -1.581053 |
| H | -4.099777 | 1.068256  | -0.618547 |
| H | 0.712037  | -1.072572 | 1.634229  |
| H | 0.701485  | -2.837394 | 1.535055  |
| H | -0.787529 | -1.985782 | 1.918739  |
| H | -4.179748 | -3.791739 | -0.686042 |
| H | 4.694232  | 1.310849  | 0.206561  |
| H | 3.626686  | 0.815679  | 1.539311  |
| H | 5.426898  | -0.758321 | 1.348905  |
| H | 4.198678  | -2.891713 | 1.071002  |
| H | 3.185015  | -1.708196 | 1.914387  |
| H | 2.899522  | -2.062546 | 0.203095  |
| H | 5.896749  | -2.114954 | -0.666577 |
| H | 6.092858  | -0.389058 | -1.019814 |
| H | 4.648438  | -1.240512 | -1.574463 |

ωB97XD energy = -1154.81650181 a.u.

(2S,6R,7S,8S)-1, Conf. L

|   |           |           |           |
|---|-----------|-----------|-----------|
| C | -3.453569 | -2.327475 | -0.109295 |
| C | -3.527437 | -0.839581 | -0.306361 |
| C | -3.399644 | 0.116418  | 0.622429  |
| C | -3.422742 | -0.110413 | 2.111533  |
| C | -0.960798 | -1.984212 | -0.178613 |
| C | -2.100232 | -2.852294 | -0.659692 |
| C | -1.778821 | 1.651247  | -0.573012 |
| C | -0.513287 | 1.191947  | 0.205156  |
| C | 0.330272  | 0.183495  | -0.611052 |
| C | -0.491546 | -1.025600 | -0.985738 |
| O | -1.568187 | 3.031522  | -0.924696 |
| C | -0.490999 | 3.565218  | -0.304952 |
| C | 0.194649  | 2.491125  | 0.471900  |
| O | -0.189795 | 4.725351  | -0.409865 |
| C | 1.248087  | 2.746999  | 1.244112  |
| C | -3.104094 | 1.545158  | 0.195210  |
| C | -0.552504 | -2.191124 | 1.255868  |
| O | -4.461161 | -3.025729 | -0.829476 |
| O | 1.470845  | -0.127551 | 0.204970  |
| C | 2.545736  | -0.640917 | -0.429887 |
| O | 2.593112  | -0.802909 | -1.625998 |
| C | 3.629279  | -0.999801 | 0.558092  |
| C | 5.015045  | -1.175075 | -0.068919 |
| C | 5.544879  | 0.149144  | -0.625127 |
| C | 5.983307  | -1.763742 | 0.959998  |
| H | -3.523897 | -2.581055 | 0.956200  |
| H | -3.516303 | -0.545729 | -1.357624 |
| H | -3.687132 | -1.131691 | 2.391018  |
| H | -4.151896 | 0.564730  | 2.573874  |
| H | -2.169194 | -2.831219 | -1.751831 |
| H | -1.984764 | -3.897781 | -0.353796 |
| H | -2.451205 | 0.124773  | 2.563648  |
| H | -0.796045 | 0.698565  | 1.138758  |
| H | 0.694553  | 0.666610  | -1.523264 |

|   |           |           |           |
|---|-----------|-----------|-----------|
| H | -0.856434 | -1.007733 | -2.010270 |
| H | 1.738646  | 1.963026  | 1.810355  |
| H | 1.633653  | 3.760255  | 1.308046  |
| H | -3.048330 | 2.202522  | 1.070666  |
| H | -1.869574 | 1.116014  | -1.520282 |
| H | -3.895359 | 1.941819  | -0.449290 |
| H | -0.123672 | -3.193800 | 1.372373  |
| H | -1.423788 | -2.146970 | 1.919082  |
| H | 0.186419  | -1.467296 | 1.598581  |
| H | -5.319775 | -2.694240 | -0.550836 |
| H | 3.649653  | -0.240194 | 1.348598  |
| H | 3.305505  | -1.932391 | 1.039711  |
| H | 4.914885  | -1.881513 | -0.901022 |
| H | 6.530869  | 0.010949  | -1.079526 |
| H | 4.878139  | 0.554459  | -1.390885 |
| H | 5.647334  | 0.892595  | 0.175343  |
| H | 6.971238  | -1.920891 | 0.516469  |
| H | 5.628735  | -2.726733 | 1.343064  |
| H | 6.105748  | -1.085661 | 1.813449  |

ωB97XD energy = -1154.81637577 a.u.

(2S,6R,7S,8S)-1, Conf. M

|   |           |           |           |
|---|-----------|-----------|-----------|
| C | -2.656218 | -2.934397 | 0.088631  |
| C | -3.082229 | -1.487771 | 0.114871  |
| C | -2.922681 | -0.603367 | 1.103864  |
| C | -2.490574 | -0.960234 | 2.499150  |
| C | -0.447562 | -1.897663 | -0.683635 |
| C | -1.104814 | -3.078758 | -0.009853 |
| C | -1.958018 | 1.357278  | -0.166655 |
| C | -0.514981 | 1.462826  | 0.411083  |
| C | 0.440256  | 0.461590  | -0.274840 |
| C | 0.060889  | -0.937541 | 0.097158  |
| O | -2.320479 | 2.671509  | -0.628718 |
| C | -1.333607 | 3.578596  | -0.464798 |
| C | -0.171649 | 2.912459  | 0.190542  |
| O | -1.444521 | 4.726989  | -0.807365 |
| C | 0.924454  | 3.596755  | 0.510809  |
| C | -3.058372 | 0.876138  | 0.790123  |
| C | -0.565494 | -1.819633 | -2.179011 |
| O | -3.201317 | -3.595369 | -1.048606 |
| O | 1.762851  | 0.742938  | 0.220720  |
| C | 2.790412  | 0.380602  | -0.575845 |
| O | 2.640297  | -0.056470 | -1.694484 |
| C | 4.116918  | 0.554204  | 0.117555  |
| C | 4.637986  | -0.772442 | 0.723280  |
| C | 3.650288  | -1.366177 | 1.732023  |
| C | 5.007042  | -1.793618 | -0.355079 |
| H | -2.976788 | -3.459088 | 0.999581  |
| H | -3.381938 | -1.112325 | -0.865147 |
| H | -1.534811 | -0.481947 | 2.746169  |
| H | -2.374082 | -2.036123 | 2.646453  |
| H | -0.910206 | -4.017516 | -0.538392 |
| H | -0.709309 | -3.178056 | 1.005952  |
| H | -3.222511 | -0.593004 | 3.227753  |
| H | -0.520993 | 1.241817  | 1.484885  |
| H | 0.434162  | 0.627624  | -1.354575 |

|   |           |           |           |
|---|-----------|-----------|-----------|
| H | 0.096937  | -1.115010 | 1.172334  |
| H | 1.766967  | 3.126294  | 1.003610  |
| H | 0.978028  | 4.654444  | 0.269992  |
| H | -3.028411 | 1.480342  | 1.704219  |
| H | -1.957600 | 0.713039  | -1.052160 |
| H | -4.016373 | 1.080356  | 0.301476  |
| H | 0.022793  | -1.005943 | -2.606082 |
| H | -1.614325 | -1.707809 | -2.478578 |
| H | -0.218678 | -2.757004 | -2.625309 |
| H | -4.160173 | -3.527240 | -1.015646 |
| H | 4.831786  | 0.920445  | -0.624362 |
| H | 4.013940  | 1.301451  | 0.909359  |
| H | 5.554827  | -0.503988 | 1.263530  |
| H | 3.359728  | -0.633103 | 2.491336  |
| H | 2.737580  | -1.711520 | 1.232858  |
| H | 4.096381  | -2.227027 | 2.239642  |
| H | 5.440418  | -2.688499 | 0.102936  |
| H | 5.738287  | -1.384004 | -1.059035 |
| H | 4.127453  | -2.096471 | -0.931411 |

ωB97XD energy = -1154.81633199 a.u.

(2S,6R,7S,8S)-1, Conf. N

|   |           |           |           |
|---|-----------|-----------|-----------|
| C | -4.052183 | -1.606269 | 0.071563  |
| C | -3.701919 | -0.155806 | -0.149465 |
| C | -3.292934 | 0.736174  | 0.757911  |
| C | -3.339862 | 0.512894  | 2.244002  |
| C | -1.531560 | -1.895396 | -0.249828 |
| C | -2.784400 | -2.464786 | 0.373007  |
| C | -1.288789 | 1.711020  | -0.430991 |
| C | -0.100096 | 1.245369  | 0.462536  |
| C | 0.334714  | -0.191649 | 0.094351  |
| C | -0.731374 | -1.150997 | 0.521895  |
| O | -0.861266 | 2.911152  | -1.101720 |
| C | 0.399432  | 3.274091  | -0.780631 |
| C | 0.936830  | 2.308326  | 0.219539  |
| O | 0.936901  | 4.241065  | -1.254721 |
| C | 2.129612  | 2.482725  | 0.783346  |
| C | -2.616833 | 2.009444  | 0.278917  |
| C | -1.369298 | -2.079874 | -1.732119 |
| O | -4.654682 | -2.159200 | -1.094018 |
| O | 1.557484  | -0.463901 | 0.807702  |
| C | 2.364176  | -1.398853 | 0.263495  |
| O | 2.116807  | -1.954015 | -0.783742 |
| C | 3.592922  | -1.647352 | 1.104257  |
| C | 4.906997  | -1.204777 | 0.420120  |
| C | 5.241873  | -2.039261 | -0.818349 |
| C | 4.896672  | 0.291658  | 0.098804  |
| H | -4.738485 | -1.723985 | 0.921994  |
| H | -3.603890 | 0.103194  | -1.204938 |
| H | -3.878196 | 1.332741  | 2.733355  |
| H | -2.329929 | 0.502346  | 2.672070  |
| H | -2.998057 | -3.477917 | 0.017458  |
| H | -2.657451 | -2.508827 | 1.459281  |
| H | -3.827885 | -0.425511 | 2.516218  |
| H | -0.394090 | 1.248551  | 1.518397  |
| H | 0.543839  | -0.250378 | -0.976189 |

|   |           |           |           |
|---|-----------|-----------|-----------|
| H | -0.945974 | -1.102535 | 1.589735  |
| H | 2.507124  | 1.796219  | 1.531720  |
| H | 2.743755  | 3.327470  | 0.485159  |
| H | -2.432080 | 2.698923  | 1.110728  |
| H | -1.471228 | 0.974141  | -1.219522 |
| H | -3.251383 | 2.538120  | -0.439597 |
| H | -2.148353 | -1.536271 | -2.279863 |
| H | -1.500919 | -3.136459 | -1.985654 |
| H | -0.386984 | -1.767514 | -2.090108 |
| H | -5.442189 | -1.649375 | -1.306330 |
| H | 3.479870  | -1.131934 | 2.061634  |
| H | 3.632711  | -2.724546 | 1.297343  |
| H | 5.692480  | -1.381795 | 1.166358  |
| H | 6.219513  | -1.748196 | -1.215736 |
| H | 5.276351  | -3.107239 | -0.580183 |
| H | 4.494275  | -1.900622 | -1.603993 |
| H | 5.855447  | 0.601015  | -0.328174 |
| H | 4.719615  | 0.891507  | 0.997448  |
| H | 4.116268  | 0.537968  | -0.630775 |

ωB97XD) energy = -1154.81572141 a.u.

(2S,6R,7S,8S)-1, Conf. O

|   |           |           |           |
|---|-----------|-----------|-----------|
| C | -3.844353 | -1.714837 | -0.046055 |
| C | -3.579717 | -0.268528 | -0.356354 |
| C | -3.279803 | 0.713462  | 0.503033  |
| C | -3.412643 | 0.631750  | 2.001143  |
| C | -1.336626 | -1.930822 | -0.033294 |
| C | -2.626695 | -2.567767 | -0.494110 |
| C | -1.318008 | 1.737010  | -0.718345 |
| C | -0.227332 | 1.061673  | 0.160399  |
| C | 0.412523  | -0.144289 | -0.567546 |
| C | -0.638707 | -1.178908 | -0.892744 |
| O | -0.770091 | 2.994685  | -1.156364 |
| C | 0.363457  | 3.321161  | -0.494024 |
| C | 0.725193  | 2.194819  | 0.415178  |
| O | 0.935213  | 4.366642  | -0.660824 |
| C | 1.726553  | 2.286746  | 1.286301  |
| C | -2.658398 | 2.000203  | -0.017003 |
| C | -1.029251 | -2.083745 | 1.432797  |
| O | -4.961789 | -2.232626 | -0.756393 |
| O | 1.455320  | -0.636297 | 0.290430  |
| C | 2.391622  | -1.411716 | -0.299264 |
| O | 2.386474  | -1.661935 | -1.482464 |
| C | 3.424580  | -1.896862 | 0.687854  |
| C | 4.795617  | -1.198662 | 0.527988  |
| C | 5.473527  | -1.525971 | -0.804329 |
| C | 4.683874  | 0.312752  | 0.741027  |
| H | -3.997793 | -1.858641 | 1.031093  |
| H | -3.462739 | -0.075005 | -1.424022 |
| H | -2.434986 | 0.720999  | 2.490896  |
| H | -3.883580 | -0.289702 | 2.347800  |
| H | -2.661254 | -2.628834 | -1.586363 |
| H | -2.754166 | -3.581818 | -0.099565 |
| H | -4.016127 | 1.473219  | 2.360805  |
| H | -0.660463 | 0.689735  | 1.092033  |
| H | 0.878775  | 0.197857  | -1.496911 |

|   |           |           |           |
|---|-----------|-----------|-----------|
| H | -0.952312 | -1.178901 | -1.934056 |
| H | 1.972102  | 1.469626  | 1.955154  |
| H | 2.320340  | 3.195141  | 1.329729  |
| H | -2.485644 | 2.702258  | 0.806936  |
| H | -1.497682 | 1.162357  | -1.629008 |
| H | -3.317728 | 2.505265  | -0.730390 |
| H | -0.126732 | -1.554307 | 1.737253  |
| H | -0.893278 | -3.146183 | 1.667061  |
| H | -1.867798 | -1.733489 | 2.045607  |
| H | -5.732856 | -1.699507 | -0.542140 |
| H | 3.048854  | -1.743295 | 1.703087  |
| H | 3.546042  | -2.971537 | 0.520558  |
| H | 5.422118  | -1.606104 | 1.331918  |
| H | 6.474918  | -1.084899 | -0.834727 |
| H | 5.573525  | -2.606741 | -0.945162 |
| H | 4.902189  | -1.134385 | -1.650465 |
| H | 5.669784  | 0.784300  | 0.688740  |
| H | 4.249499  | 0.545686  | 1.718697  |
| H | 4.053487  | 0.778347  | -0.025551 |

ωB97XD energy = -1154.81549534 a.u.

(1R,5S,6S,7S,10R)-2, Conf. A

|   |           |           |           |
|---|-----------|-----------|-----------|
| C | 3.455426  | 0.016246  | -0.232388 |
| C | 2.931714  | 1.391632  | -0.673720 |
| C | 1.581558  | 1.656898  | -0.056824 |
| C | 0.567761  | 0.581269  | -0.397932 |
| C | 1.047906  | -0.782358 | 0.186624  |
| C | 2.425758  | -1.083169 | -0.466600 |
| C | -0.887608 | 0.924539  | -0.055073 |
| C | -1.847838 | -0.194442 | -0.473220 |
| C | -1.404902 | -1.532408 | 0.127742  |
| C | 0.041833  | -1.870682 | -0.232340 |
| C | -3.325660 | 0.163171  | -0.189979 |
| C | -4.282845 | -0.830132 | -0.857330 |
| C | -3.655447 | 0.296940  | 1.300880  |
| O | -1.302311 | 2.096362  | -0.746964 |
| C | 1.365699  | 2.687544  | 0.766564  |
| O | 3.007913  | -2.289689 | 0.004852  |
| H | 0.587984  | 0.472177  | -1.495624 |
| C | 1.175546  | -0.745179 | 1.716706  |
| H | 3.715540  | 0.038344  | 0.831439  |
| H | 4.368771  | -0.238675 | -0.778223 |
| H | 3.646793  | 2.172914  | -0.400605 |
| H | 2.834145  | 1.405734  | -1.768253 |
| H | 2.253648  | -1.165100 | -1.554072 |
| H | -0.975432 | 1.088543  | 1.030455  |
| H | -1.749974 | -0.272941 | -1.567510 |
| H | -2.058158 | -2.332377 | -0.234768 |
| H | -1.522238 | -1.513430 | 1.217433  |
| H | 0.108578  | -2.013978 | -1.321281 |
| H | 0.313354  | -2.825001 | 0.237073  |
| H | -3.489567 | 1.141410  | -0.654186 |
| H | -4.050427 | -0.957291 | -1.920397 |
| H | -4.242740 | -1.816862 | -0.381998 |
| H | -5.315915 | -0.475565 | -0.781103 |

|   |           |           |           |
|---|-----------|-----------|-----------|
| H | -4.694299 | 0.617754  | 1.429155  |
| H | -3.022827 | 1.037805  | 1.799154  |
| H | -3.542799 | -0.657499 | 1.827849  |
| H | -0.618745 | 2.767202  | -0.650597 |
| H | 0.416688  | 2.848258  | 1.271301  |
| H | 2.155781  | 3.399659  | 0.987389  |
| H | 2.475955  | -3.033174 | -0.291047 |
| H | 1.810161  | 0.077304  | 2.053721  |
| H | 0.202806  | -0.617216 | 2.198797  |
| H | 1.614701  | -1.680605 | 2.074133  |

ωB97XD energy = -737.554870274 a.u.

(1R,5S,6S,7S,10R)-2, Conf. B

|   |           |           |           |
|---|-----------|-----------|-----------|
| C | 3.405980  | 0.429614  | -0.242817 |
| C | 2.665651  | 1.727129  | -0.600009 |
| C | 1.301586  | 1.741162  | 0.042918  |
| C | 0.462098  | 0.541815  | -0.357233 |
| C | 1.161618  | -0.760214 | 0.138725  |
| C | 2.558712  | -0.801790 | -0.540989 |
| C | -1.023398 | 0.632489  | 0.019990  |
| C | -1.810062 | -0.591794 | -0.460357 |
| C | -1.143775 | -1.879721 | 0.040699  |
| C | 0.333013  | -1.966221 | -0.339948 |
| C | -3.317838 | -0.577876 | -0.095210 |
| C | -3.589190 | -0.161589 | 1.355024  |
| C | -4.170463 | 0.255188  | -1.058214 |
| O | -1.616779 | 1.777460  | -0.581444 |
| C | 0.947376  | 2.671898  | 0.934710  |
| O | 3.328811  | -1.929209 | -0.151145 |
| H | 0.479972  | 0.503422  | -1.459732 |
| C | 1.306085  | -0.796503 | 1.667475  |
| H | 3.671043  | 0.430291  | 0.819993  |
| H | 4.341741  | 0.355056  | -0.804803 |
| H | 3.253210  | 2.595716  | -0.288569 |
| H | 2.548635  | 1.786886  | -1.691103 |
| H | 2.383728  | -0.841326 | -1.630318 |
| H | -1.114272 | 0.705887  | 1.115039  |
| H | -1.737866 | -0.587624 | -1.558823 |
| H | -1.673503 | -2.739775 | -0.383742 |
| H | -1.257999 | -1.961593 | 1.128632  |
| H | 0.408506  | -2.034420 | -1.435758 |
| H | 0.755703  | -2.891992 | 0.071396  |
| H | -3.649952 | -1.621006 | -0.199903 |
| H | -2.977703 | -0.723591 | 2.069660  |
| H | -3.391706 | 0.906081  | 1.498441  |
| H | -4.639208 | -0.339375 | 1.608307  |
| H | -3.929403 | 1.316972  | -0.975088 |
| H | -5.235105 | 0.117196  | -0.838371 |
| H | -4.000957 | -0.047326 | -2.097176 |
| H | -1.029072 | 2.528860  | -0.450688 |
| H | -0.003410 | 2.653173  | 1.460828  |
| H | 1.625996  | 3.479946  | 1.192876  |
| H | 2.918510  | -2.726524 | -0.496440 |
| H | 1.908162  | -1.660788 | 1.961254  |
| H | 1.790496  | 0.102349  | 2.055052  |
| H | 0.333848  | -0.874025 | 2.161155  |

ωB97XD energy = -737.553303664 a.u.

(1R,5S,6R,7R,8R,10R)-3, Conf. A

|   |           |           |           |
|---|-----------|-----------|-----------|
| C | 4.268154  | -1.033405 | 0.388942  |
| C | 4.241129  | 0.414278  | 0.902219  |
| C | 2.833937  | 0.879748  | 1.191079  |
| C | 1.912496  | 0.686477  | 0.008607  |
| C | 1.836389  | -0.836821 | -0.382140 |
| C | 3.278204  | -1.250909 | -0.756148 |
| C | 0.495129  | 1.206022  | 0.122519  |
| C | -0.223235 | 1.096602  | -1.222527 |
| C | -0.432364 | -0.353557 | -1.617604 |
| C | 0.934724  | -1.051058 | -1.627760 |
| O | 0.381314  | 2.601741  | 0.460954  |
| C | -0.775958 | 3.093805  | -0.062841 |
| C | -1.327513 | 2.093365  | -1.037578 |
| O | 3.249305  | -2.608841 | -1.171367 |
| C | 2.469026  | 1.391202  | 2.366645  |
| C | -2.542328 | 2.193765  | -1.568770 |
| O | -1.215393 | 4.171414  | 0.238446  |
| H | 2.377369  | 1.212426  | -0.841990 |
| C | 1.329231  | -1.699629 | 0.788890  |
| O | -1.297030 | -1.003246 | -0.669004 |
| C | -2.572631 | -1.252785 | -1.016946 |
| O | -3.038661 | -0.980431 | -2.100941 |
| C | -3.324527 | -1.952146 | 0.089841  |
| C | -2.996040 | -1.501246 | 1.520554  |
| C | -3.293886 | -0.013469 | 1.721446  |
| C | -3.778300 | -2.356803 | 2.519808  |
| H | 4.029761  | -1.729547 | 1.199860  |
| H | 5.279390  | -1.281234 | 0.042013  |
| H | 4.672307  | 1.071883  | 0.133452  |
| H | 4.868986  | 0.511627  | 1.792291  |
| H | 3.586244  | -0.619728 | -1.608335 |
| H | -0.054447 | 0.647382  | 0.890145  |
| H | 0.458152  | 1.516327  | -1.979374 |
| H | -0.896977 | -0.429334 | -2.603371 |
| H | 1.462981  | -0.674044 | -2.513552 |
| H | 0.793607  | -2.122791 | -1.787294 |
| H | 4.144619  | -2.892364 | -1.374459 |
| H | 3.188397  | 1.487137  | 3.175321  |
| H | 1.464954  | 1.755447  | 2.554637  |
| H | -2.925404 | 1.451801  | -2.262032 |
| H | -3.178118 | 3.029459  | -1.291296 |
| H | 0.262998  | -1.549168 | 0.958756  |
| H | 1.852259  | -1.470734 | 1.719875  |
| H | 1.484146  | -2.755592 | 0.553570  |
| H | -4.389888 | -1.820520 | -0.123175 |
| H | -3.107971 | -3.022852 | -0.019952 |
| H | -1.925889 | -1.666855 | 1.690770  |
| H | -4.356010 | 0.195564  | 1.546348  |
| H | -3.056829 | 0.295993  | 2.744104  |
| H | -2.713862 | 0.613872  | 1.038021  |
| H | -3.557520 | -3.422137 | 2.395507  |
| H | -4.857943 | -2.218875 | 2.386973  |

H            -3.531408   -2.078848   3.549059  
 ωB97XD energy = -1154.85459973 a.u.

(1R,5S,6R,7R,8R,10R)-3, Conf. B

|   |           |           |           |
|---|-----------|-----------|-----------|
| C | 4.443866  | -0.690815 | 0.421276  |
| C | 4.322509  | 0.830776  | 0.592946  |
| C | 2.898846  | 1.248591  | 0.872539  |
| C | 1.933304  | 0.723674  | -0.165291 |
| C | 1.966875  | -0.849996 | -0.199302 |
| C | 3.417280  | -1.234656 | -0.572958 |
| C | 0.484462  | 1.150773  | -0.062092 |
| C | -0.299682 | 0.683724  | -1.288361 |
| C | -0.399341 | -0.829993 | -1.338664 |
| C | 1.022518  | -1.405889 | -1.298260 |
| O | 0.263152  | 2.574930  | -0.036742 |
| C | -0.964402 | 2.843695  | -0.562752 |
| C | -1.478260 | 1.607539  | -1.243376 |
| O | 3.483068  | -2.649732 | -0.672750 |
| C | 2.555397  | 1.987662  | 1.927271  |
| C | -2.724602 | 1.487107  | -1.690198 |
| O | -1.483603 | 3.924377  | -0.475157 |
| H | 2.301707  | 1.074654  | -1.143821 |
| C | 1.597960  | -1.457697 | 1.167894  |
| O | -1.142976 | -1.315452 | -0.207750 |
| C | -2.401967 | -1.757587 | -0.391392 |
| O | -2.957014 | -1.775839 | -1.467997 |
| C | -3.013889 | -2.208211 | 0.911052  |
| C | -3.679434 | -1.064269 | 1.713683  |
| C | -2.674330 | -0.007994 | 2.181858  |
| C | -4.836098 | -0.420413 | 0.945905  |
| H | 4.308375  | -1.194241 | 1.384105  |
| H | 5.452719  | -0.941077 | 0.069040  |
| H | 4.652139  | 1.319309  | -0.335520 |
| H | 4.989618  | 1.176429  | 1.387602  |
| H | 3.623615  | -0.792567 | -1.563573 |
| H | 0.035542  | 0.744517  | 0.851852  |
| H | 0.293370  | 0.972593  | -2.170759 |
| H | -0.910535 | -1.159411 | -2.246305 |
| H | 1.467003  | -1.200450 | -2.281231 |
| H | 0.969464  | -2.493528 | -1.206317 |
| H | 4.387276  | -2.907331 | -0.870742 |
| H | 3.305288  | 2.318468  | 2.640509  |
| H | 1.534506  | 2.309289  | 2.101949  |
| H | -3.072372 | 0.577823  | -2.170444 |
| H | -3.421783 | 2.309772  | -1.560339 |
| H | 1.823747  | -2.527120 | 1.159131  |
| H | 0.534317  | -1.344539 | 1.378927  |
| H | 2.153751  | -0.991247 | 1.984188  |
| H | -3.766503 | -2.961128 | 0.664490  |
| H | -2.234841 | -2.671943 | 1.523344  |
| H | -4.094791 | -1.550461 | 2.605575  |
| H | -2.305780 | 0.581615  | 1.336784  |
| H | -3.149054 | 0.684471  | 2.883607  |
| H | -1.811761 | -0.462475 | 2.680591  |
| H | -4.474512 | 0.099875  | 0.053047  |
| H | -5.349876 | 0.313229  | 1.574685  |

H            -5.567725   -1.166918   0.622109  
 ωB97XD energy = -1154.85457756 a.u.

(1R,5S,6R,7R,8R,10R)-3, Conf. C

|   |           |           |           |
|---|-----------|-----------|-----------|
| C | 4.371190  | -0.938323 | 0.563440  |
| C | 4.312186  | 0.561924  | 0.887821  |
| C | 2.894391  | 1.029043  | 1.114343  |
| C | 1.982740  | 0.668194  | -0.036053 |
| C | 1.941116  | -0.892732 | -0.234507 |
| C | 3.394177  | -1.318695 | -0.549448 |
| C | 0.553209  | 1.164517  | 0.014109  |
| C | -0.163189 | 0.872178  | -1.304620 |
| C | -0.332888 | -0.621702 | -1.520125 |
| C | 1.053028  | -1.276852 | -1.447768 |
| O | 0.405824  | 2.588569  | 0.177119  |
| C | -0.763069 | 2.983914  | -0.399243 |
| C | -1.291239 | 1.857847  | -1.241022 |
| O | 3.396932  | -2.717958 | -0.792700 |
| C | 2.513588  | 1.674752  | 2.216438  |
| C | -2.507568 | 1.865651  | -1.778176 |
| O | -1.229282 | 4.079268  | -0.231611 |
| H | 2.438279  | 1.096206  | -0.944548 |
| C | 1.445972  | -1.616451 | 1.032582  |
| O | -1.175121 | -1.180883 | -0.496310 |
| C | -2.452147 | -1.484439 | -0.793956 |
| O | -2.941615 | -1.334812 | -1.891954 |
| C | -3.190110 | -2.004925 | 0.412071  |
| C | -3.938138 | -0.888823 | 1.174582  |
| C | -4.822157 | -1.516711 | 2.254518  |
| C | -2.977905 | 0.135950  | 1.783601  |
| H | 4.141370  | -1.529932 | 1.455663  |
| H | 5.389742  | -1.207391 | 0.255672  |
| H | 4.731742  | 1.123385  | 0.040418  |
| H | 4.935522  | 0.786569  | 1.757914  |
| H | 3.693718  | -0.791974 | -1.472591 |
| H | 0.019249  | 0.693429  | 0.847950  |
| H | 0.507340  | 1.213427  | -2.109093 |
| H | -0.795873 | -0.827192 | -2.488170 |
| H | 1.576017  | -0.993327 | -2.370867 |
| H | 0.940972  | -2.363373 | -1.479953 |
| H | 4.299001  | -3.004613 | -0.957964 |
| H | 3.227741  | 1.888090  | 3.007090  |
| H | 1.500988  | 2.036685  | 2.357271  |
| H | -2.874499 | 1.035516  | -2.372945 |
| H | -3.160789 | 2.715779  | -1.604287 |
| H | 0.378296  | -1.461420 | 1.189802  |
| H | 1.969471  | -1.273025 | 1.927335  |
| H | 1.614309  | -2.690553 | 0.920888  |
| H | -3.911291 | -2.742614 | 0.050540  |
| H | -2.485548 | -2.499117 | 1.089076  |
| H | -4.586528 | -0.373601 | 0.454248  |
| H | -5.540236 | -2.223417 | 1.826368  |
| H | -4.212135 | -2.056699 | 2.988587  |
| H | -5.384788 | -0.746242 | 2.790617  |
| H | -2.410016 | 0.664649  | 1.014515  |
| H | -2.264823 | -0.352878 | 2.458593  |

H -3.530268 0.884254 2.360003  
 ωB97XD energy = -1154.85432165 a.u.

(1R,5S,6R,7R,8R,10R)-3, Conf. D

|   |           |           |           |
|---|-----------|-----------|-----------|
| C | 3.773184  | -1.969425 | 0.042433  |
| C | 4.231309  | -0.626730 | 0.630477  |
| C | 3.060368  | 0.213855  | 1.080192  |
| C | 2.033391  | 0.403740  | -0.012725 |
| C | 1.471284  | -0.990049 | -0.485946 |
| C | 2.687687  | -1.782229 | -1.017363 |
| C | 0.847461  | 1.298633  | 0.280573  |
| C | 0.024652  | 1.527050  | -0.986360 |
| C | -0.627622 | 0.247177  | -1.466963 |
| C | 0.460155  | -0.819028 | -1.649920 |
| O | 1.167909  | 2.634725  | 0.718146  |
| C | 0.150054  | 3.470589  | 0.365224  |
| C | -0.746123 | 2.751136  | -0.602052 |
| O | 2.215642  | -3.027759 | -1.510344 |
| C | 2.960899  | 0.713148  | 2.312156  |
| C | -1.946738 | 3.192594  | -0.964344 |
| O | 0.059605  | 4.593442  | 0.784110  |
| H | 2.564073  | 0.844694  | -0.872913 |
| C | 0.808944  | -1.758930 | 0.673252  |
| O | -1.592874 | -0.182333 | -0.490882 |
| C | -2.894728 | -0.198112 | -0.832174 |
| O | -3.307140 | 0.128290  | -1.922898 |
| C | -3.772257 | -0.622642 | 0.320322  |
| C | -3.183590 | -1.662027 | 1.283805  |
| C | -4.175542 | -1.929153 | 2.418550  |
| C | -2.818988 | -2.958452 | 0.556506  |
| H | 3.389579  | -2.622232 | 0.833314  |
| H | 4.630944  | -2.484219 | -0.408870 |
| H | 4.780832  | -0.071268 | -0.143563 |
| H | 4.927686  | -0.792157 | 1.457233  |
| H | 3.113283  | -1.201406 | -1.854473 |
| H | 0.220955  | 0.852080  | 1.061842  |
| H | 0.734042  | 1.824415  | -1.774464 |
| H | -1.151262 | 0.403623  | -2.412407 |
| H | 1.011884  | -0.540067 | -2.557744 |
| H | -0.008584 | -1.783438 | -1.862026 |
| H | 2.964334  | -3.546669 | -1.815907 |
| H | 3.734665  | 0.523588  | 3.051097  |
| H | 2.133483  | 1.344136  | 2.617788  |
| H | -2.571554 | 2.637412  | -1.657987 |
| H | -2.323603 | 4.125666  | -0.556299 |
| H | -0.154278 | -1.322508 | 0.937222  |
| H | 1.432883  | -1.762466 | 1.569864  |
| H | 0.631793  | -2.793446 | 0.368362  |
| H | -4.013770 | 0.297439  | 0.869052  |
| H | -4.708869 | -0.983051 | -0.116673 |
| H | -2.270610 | -1.240890 | 1.720624  |
| H | -4.421690 | -1.009965 | 2.960374  |
| H | -5.109256 | -2.351269 | 2.028135  |
| H | -3.762298 | -2.643763 | 3.137144  |
| H | -2.405561 | -3.691493 | 1.256334  |
| H | -2.070874 | -2.787880 | -0.223646 |

H -3.706173 -3.402652 0.089683  
 ωB97XD energy = -1154.85413979 a.u.

(1R,5S,6R,7R,8R,10R)-3, Conf. E

|   |           |           |           |
|---|-----------|-----------|-----------|
| C | 4.433845  | -1.284791 | 0.439337  |
| C | 4.530162  | 0.204386  | 0.802281  |
| C | 3.176707  | 0.798416  | 1.110386  |
| C | 2.178775  | 0.557720  | 0.001054  |
| C | 1.973202  | -0.986597 | -0.223893 |
| C | 3.365124  | -1.552310 | -0.620387 |
| C | 0.810707  | 1.195163  | 0.128198  |
| C | 0.007782  | 0.999293  | -1.157554 |
| C | -0.317786 | -0.462848 | -1.395009 |
| C | 0.996545  | -1.253193 | -1.398465 |
| O | 0.812061  | 2.623974  | 0.314151  |
| C | -0.343073 | 3.138883  | -0.194289 |
| C | -1.019068 | 2.080946  | -1.018914 |
| O | 3.311919  | -2.927451 | -0.964846 |
| C | 2.912599  | 1.449140  | 2.243470  |
| C | -2.254963 | 2.205452  | -1.493097 |
| O | -0.690654 | 4.271425  | 0.008239  |
| H | 2.632184  | 0.955693  | -0.922096 |
| C | 1.461779  | -1.680331 | 1.052315  |
| O | -1.177736 | -0.951812 | -0.347943 |
| C | -2.467011 | -1.206830 | -0.639809 |
| O | -2.956703 | -1.031073 | -1.733340 |
| C | -3.207738 | -1.755970 | 0.554401  |
| C | -4.591630 | -1.116265 | 0.739311  |
| C | -5.370762 | -1.855812 | 1.828291  |
| C | -4.467248 | 0.373485  | 1.067439  |
| H | 4.205066  | -1.865530 | 1.342860  |
| H | 5.394903  | -1.647991 | 0.061725  |
| H | 4.959855  | 0.745029  | -0.053283 |
| H | 5.214804  | 0.346397  | 1.643184  |
| H | 3.664906  | -1.051047 | -1.550504 |
| H | 0.270137  | 0.766670  | 0.980465  |
| H | 0.668126  | 1.295952  | -1.987733 |
| H | -0.836218 | -0.598214 | -2.346821 |
| H | 1.503283  | -0.999750 | -2.339010 |
| H | 0.779687  | -2.323125 | -1.451708 |
| H | 3.325694  | -3.452500 | -0.159104 |
| H | 3.679077  | 1.572238  | 3.003736  |
| H | 1.947822  | 1.904352  | 2.439359  |
| H | -2.720921 | 1.422453  | -2.083694 |
| H | -2.821197 | 3.107091  | -1.278368 |
| H | 0.438413  | -1.387688 | 1.288188  |
| H | 2.083766  | -1.454956 | 1.921395  |
| H | 1.442936  | -2.765475 | 0.904140  |
| H | -3.318401 | -2.833734 | 0.381199  |
| H | -2.596932 | -1.629584 | 1.453801  |
| H | -5.128059 | -1.219935 | -0.210933 |
| H | -4.851601 | -1.791646 | 2.792198  |
| H | -6.365115 | -1.417463 | 1.957928  |
| H | -5.499039 | -2.915380 | 1.583633  |
| H | -3.926066 | 0.519778  | 2.010103  |
| H | -5.454888 | 0.832299  | 1.175049  |

H            -3.931002   0.917928   0.283809  
 ωB97XD energy = -1154.85351123 a.u.

(1R,5S,6R,7R,8R,10R)-3, Conf. F

|   |           |           |           |
|---|-----------|-----------|-----------|
| C | 3.210072  | -2.647372 | 0.029133  |
| C | 3.967779  | -1.439693 | 0.597625  |
| C | 3.030579  | -0.350175 | 1.058992  |
| C | 2.054990  | 0.062579  | -0.019825 |
| C | 1.178932  | -1.169662 | -0.461226 |
| C | 2.174085  | -2.231544 | -1.007914 |
| C | 1.114699  | 1.211131  | 0.279237  |
| C | 0.342910  | 1.606768  | -0.978026 |
| C | -0.599287 | 0.516195  | -1.432766 |
| C | 0.204817  | -0.782963 | -1.606229 |
| O | 1.746021  | 2.442122  | 0.686127  |
| C | 0.949752  | 3.488632  | 0.329813  |
| C | -0.107434 | 2.985543  | -0.611769 |
| O | 1.525643  | -3.419155 | -1.436679 |
| C | 3.069804  | 0.168091  | 2.286490  |
| C | -1.173029 | 3.694085  | -0.968752 |
| O | 1.133038  | 4.608578  | 0.724951  |
| H | 2.658740  | 0.358961  | -0.894317 |
| C | 0.387583  | -1.756661 | 0.719589  |
| O | -1.638909 | 0.382115  | -0.449973 |
| C | -2.859226 | 0.009974  | -0.889241 |
| O | -3.101878 | -0.220250 | -2.052578 |
| C | -3.848290 | -0.077014 | 0.244331  |
| C | -3.449617 | -1.095141 | 1.328534  |
| C | -4.502025 | -1.111303 | 2.438419  |
| C | -3.252076 | -2.490687 | 0.733336  |
| H | 2.704919  | -3.191695 | 0.833974  |
| H | 3.906602  | -3.348931 | -0.439244 |
| H | 4.618523  | -1.028026 | -0.187751 |
| H | 4.621434  | -1.755060 | 1.415713  |
| H | 2.702372  | -1.774883 | -1.862861 |
| H | 0.418779  | 0.932717  | 1.079342  |
| H | 1.088973  | 1.715834  | -1.781113 |
| H | -1.071649 | 0.769696  | -2.385125 |
| H | 0.778963  | -0.657314 | -2.535764 |
| H | -0.505646 | -1.598322 | -1.780776 |
| H | 1.054734  | -3.251740 | -2.257199 |
| H | 3.793438  | -0.187747 | 3.014616  |
| H | 2.412392  | 0.971797  | 2.599783  |
| H | -1.921768 | 3.295557  | -1.646753 |
| H | -1.312068 | 4.697834  | -0.579138 |
| H | -0.447264 | -1.113142 | 0.999910  |
| H | 1.015787  | -1.891703 | 1.602426  |
| H | -0.018914 | -2.730788 | 0.434429  |
| H | -3.939255 | 0.918514  | 0.693999  |
| H | -4.813496 | -0.344678 | -0.194397 |
| H | -2.499361 | -0.763494 | 1.763901  |
| H | -5.475368 | -1.429229 | 2.046576  |
| H | -4.217236 | -1.809279 | 3.231632  |
| H | -4.625900 | -0.120998 | 2.888598  |
| H | -2.479313 | -2.497798 | -0.041939 |
| H | -4.181782 | -2.855329 | 0.281621  |

H            -2.948056   -3.202760   1.506575  
 ωB97XD energy = -1154.85310905 a.u.

(1R,5S,6R,7R,8R,10R)-3, Conf. G

|   |           |           |           |
|---|-----------|-----------|-----------|
| C | 2.784719  | -3.105465 | -0.004160 |
| C | 3.779562  | -2.049883 | 0.499430  |
| C | 3.072857  | -0.809064 | 0.990140  |
| C | 2.127112  | -0.237880 | -0.041714 |
| C | 1.026445  | -1.297468 | -0.427971 |
| C | 1.787590  | -2.515138 | -1.001072 |
| C | 1.414863  | 1.055451  | 0.293673  |
| C | 0.652460  | 1.575762  | -0.923435 |
| C | -0.480719 | 0.657605  | -1.321750 |
| C | 0.087665  | -0.753115 | -1.536920 |
| O | 2.270355  | 2.160851  | 0.650483  |
| C | 1.644104  | 3.327529  | 0.327891  |
| C | 0.460889  | 3.009383  | -0.541616 |
| O | 0.826171  | -3.476275 | -1.411743 |
| C | 3.270409  | -0.299825 | 2.206146  |
| C | -0.493578 | 3.885624  | -0.835264 |
| O | 2.040783  | 4.400197  | 0.697215  |
| H | 2.724712  | -0.050702 | -0.949394 |
| C | 0.197487  | -1.727077 | 0.797760  |
| O | -1.466975 | 0.684735  | -0.274769 |
| C | -2.754655 | 0.516803  | -0.631265 |
| O | -3.117163 | 0.384317  | -1.778961 |
| C | -3.673228 | 0.497970  | 0.563991  |
| C | -4.468206 | -0.817810 | 0.645800  |
| C | -3.533758 | -2.016984 | 0.822561  |
| C | -5.491264 | -0.741707 | 1.779846  |
| H | 2.232969  | -3.539119 | 0.836395  |
| H | 3.330355  | -3.927168 | -0.485438 |
| H | 4.445933  | -1.766568 | -0.328343 |
| H | 4.412075  | -2.469251 | 1.286774  |
| H | 2.345473  | -2.161983 | -1.886115 |
| H | 0.727572  | 0.902757  | 1.134054  |
| H | 1.361980  | 1.560480  | -1.765594 |
| H | -0.960760 | 0.995080  | -2.243666 |
| H | 0.641797  | -0.718901 | -2.484601 |
| H | -0.733773 | -1.456752 | -1.692894 |
| H | 1.282908  | -4.250850 | -1.750245 |
| H | 3.959607  | -0.774062 | 2.899550  |
| H | 2.784026  | 0.609341  | 2.542150  |
| H | -1.341224 | 3.616187  | -1.458159 |
| H | -0.438715 | 4.897606  | -0.445962 |
| H | -0.508061 | -0.950310 | 1.094391  |
| H | 0.830145  | -1.952311 | 1.659383  |
| H | -0.378777 | -2.621384 | 0.547109  |
| H | -3.095109 | 0.655855  | 1.479528  |
| H | -4.368021 | 1.337510  | 0.450338  |
| H | -5.003276 | -0.933306 | -0.304100 |
| H | -2.957727 | -1.928328 | 1.751557  |
| H | -4.103573 | -2.950096 | 0.868291  |
| H | -2.822639 | -2.104855 | -0.005226 |
| H | -6.189556 | 0.089201  | 1.635671  |
| H | -4.993265 | -0.601168 | 2.746730  |

H            -6.074967   -1.665777   1.837573  
 ωB97XD energy = -1154.85307473 a.u.

(1R,5S,6R,7R,8R,10R)-3, Conf. H

|   |           |           |           |
|---|-----------|-----------|-----------|
| C | 4.242232  | -1.300961 | 0.464965  |
| C | 4.405107  | 0.194978  | 0.771040  |
| C | 3.076407  | 0.853010  | 1.057089  |
| C | 2.067578  | 0.616416  | -0.043607 |
| C | 1.807853  | -0.926870 | -0.228479 |
| C | 3.174197  | -1.547684 | -0.600828 |
| C | 0.719063  | 1.294616  | 0.076273  |
| C | -0.093903 | 1.092654  | -1.201838 |
| C | -0.464371 | -0.358956 | -1.407932 |
| C | 0.823622  | -1.194965 | -1.397899 |
| O | 0.754034  | 2.728553  | 0.228967  |
| C | -0.395560 | 3.255820  | -0.277924 |
| C | -1.100156 | 2.192063  | -1.071277 |
| O | 2.974922  | -2.934544 | -0.830385 |
| C | 2.840252  | 1.550151  | 2.168533  |
| C | -2.345630 | 2.310221  | -1.518127 |
| O | -0.719716 | 4.399157  | -0.098288 |
| H | 2.528271  | 0.978657  | -0.977653 |
| C | 1.274450  | -1.573335 | 1.065125  |
| O | -1.357305 | -0.731958 | -0.346373 |
| C | -2.253989 | -1.708551 | -0.587257 |
| O | -2.369104 | -2.256519 | -1.659719 |
| C | -3.062326 | -2.009203 | 0.649610  |
| C | -3.777381 | -0.778702 | 1.236147  |
| C | -4.772388 | -0.190868 | 0.233138  |
| C | -4.473223 | -1.152400 | 2.546057  |
| H | 3.971831  | -1.848099 | 1.374023  |
| H | 5.198321  | -1.712334 | 0.117009  |
| H | 4.856230  | 0.687511  | -0.102697 |
| H | 5.094740  | 0.338461  | 1.607525  |
| H | 3.502366  | -1.069164 | -1.540263 |
| H | 0.172580  | 0.898422  | 0.939895  |
| H | 0.567601  | 1.360771  | -2.040348 |
| H | -0.983927 | -0.510758 | -2.357815 |
| H | 1.334868  | -0.983778 | -2.346787 |
| H | 0.569001  | -2.257192 | -1.422064 |
| H | 3.819916  | -3.341510 | -1.038950 |
| H | 3.612171  | 1.666950  | 2.924246  |
| H | 1.893329  | 2.046082  | 2.351961  |
| H | -2.821343 | 1.518871  | -2.089428 |
| H | -2.913113 | 3.213207  | -1.315289 |
| H | 0.243181  | -1.278047 | 1.262326  |
| H | 1.872355  | -1.296571 | 1.936420  |
| H | 1.297707  | -2.660999 | 0.959115  |
| H | -3.784537 | -2.786851 | 0.386052  |
| H | -2.373781 | -2.423763 | 1.396461  |
| H | -3.015490 | -0.020174 | 1.451344  |
| H | -5.260995 | 0.696606  | 0.646580  |
| H | -4.280170 | 0.104914  | -0.698705 |
| H | -5.549605 | -0.922190 | -0.017199 |
| H | -4.967868 | -0.280274 | 2.984667  |
| H | -3.760200 | -1.539967 | 3.281180  |

H            -5.237088   -1.920911   2.377932  
 ωB97XD energy = -1154.85289376 a.u.

(1R,5S,6R,7R,8R,10R)-3, Conf. I

|   |           |           |           |
|---|-----------|-----------|-----------|
| C | 3.422584  | -2.580390 | -0.086247 |
| C | 4.201752  | -1.308538 | 0.281286  |
| C | 3.287837  | -0.226328 | 0.804448  |
| C | 2.147372  | 0.071169  | -0.142523 |
| C | 1.274047  | -1.220339 | -0.369485 |
| C | 2.224887  | -2.271997 | -0.985249 |
| C | 1.209376  | 1.204153  | 0.216236  |
| C | 0.231801  | 1.476297  | -0.925858 |
| C | -0.709018 | 0.310358  | -1.152448 |
| C | 0.132410  | -0.951488 | -1.384654 |
| O | 1.838947  | 2.483389  | 0.431907  |
| C | 0.944452  | 3.470207  | 0.139894  |
| C | -0.224422 | 2.859288  | -0.578336 |
| O | 1.464671  | -3.439226 | -1.263155 |
| C | 3.479970  | 0.378415  | 1.976629  |
| C | -1.366953 | 3.500909  | -0.802961 |
| O | 1.136758  | 4.622360  | 0.423094  |
| H | 2.602220  | 0.326123  | -1.114191 |
| C | 0.688267  | -1.752211 | 0.952376  |
| O | -1.551902 | 0.137110  | -0.000063 |
| C | -2.871854 | 0.378197  | -0.121534 |
| O | -3.390305 | 0.775364  | -1.142199 |
| C | -3.605300 | 0.058254  | 1.155564  |
| C | -4.181910 | -1.378585 | 1.173638  |
| C | -5.254529 | -1.583284 | 0.101153  |
| C | -3.085897 | -2.442947 | 1.075169  |
| H | 3.067553  | -3.083723 | 0.818937  |
| H | 4.088153  | -3.283188 | -0.603316 |
| H | 4.707468  | -0.930100 | -0.618862 |
| H | 4.981840  | -1.539967 | 1.011830  |
| H | 2.601608  | -1.852391 | -1.934810 |
| H | 0.660150  | 0.963713  | 1.134430  |
| H | 0.834747  | 1.559205  | -1.843988 |
| H | -1.353463 | 0.491206  | -2.015681 |
| H | 0.570657  | -0.847467 | -2.386340 |
| H | -0.523511 | -1.824774 | -1.425288 |
| H | 2.049899  | -4.117078 | -1.611274 |
| H | 4.316702  | 0.103034  | 2.612769  |
| H | 2.836328  | 1.177305  | 2.328613  |
| H | -2.196938 | 3.023686  | -1.315484 |
| H | -1.484826 | 4.524497  | -0.460060 |
| H | -0.103502 | -1.102801 | 1.326325  |
| H | 1.450337  | -1.835140 | 1.730190  |
| H | 0.252756  | -2.740276 | 0.782564  |
| H | -2.921067 | 0.186963  | 1.998670  |
| H | -4.422466 | 0.778424  | 1.248625  |
| H | -4.662171 | -1.481543 | 2.155016  |
| H | -5.711596 | -2.572391 | 0.205489  |
| H | -6.045751 | -0.831416 | 0.179998  |
| H | -4.830170 | -1.509806 | -0.905130 |
| H | -2.590299 | -2.418112 | 0.098486  |
| H | -3.514026 | -3.441832 | 1.203942  |



H            -2.315212 -2.300984 1.839277  
 ωB97XD energy = -1154.85268700 a.u.

(1R,5S,6R,7R,8R,10R)-3, Conf. J

|   |           |           |           |
|---|-----------|-----------|-----------|
| C | 3.908413  | -2.209078 | 0.221947  |
| C | 4.480365  | -0.832525 | 0.591104  |
| C | 3.392165  | 0.129103  | 1.003959  |
| C | 2.300773  | 0.241852  | -0.036094 |
| C | 1.628822  | -1.162209 | -0.282085 |
| C | 2.757966  | -2.095134 | -0.778505 |
| C | 1.193467  | 1.243768  | 0.212300  |
| C | 0.283074  | 1.349592  | -1.009681 |
| C | -0.468648 | 0.064039  | -1.270285 |
| C | 0.549937  | -1.078733 | -1.393610 |
| O | 1.623314  | 2.603818  | 0.427699  |
| C | 0.630216  | 3.449256  | 0.032504  |
| C | -0.384835 | 2.662298  | -0.747263 |
| O | 2.183062  | -3.362256 | -1.061219 |
| C | 3.409447  | 0.784960  | 2.164288  |
| C | -1.587679 | 3.124822  | -1.070248 |
| O | 0.640066  | 4.624323  | 0.284591  |
| H | 2.791878  | 0.531684  | -0.979880 |
| C | 1.009617  | -1.732079 | 1.008926  |
| O | -1.383140 | -0.137905 | -0.179142 |
| C | -2.522749 | -0.807857 | -0.435046 |
| O | -2.830977 | -1.202070 | -1.536886 |
| C | -3.320109 | -1.018667 | 0.828612  |
| C | -4.826092 | -1.167190 | 0.590898  |
| C | -5.520854 | -1.601783 | 1.883066  |
| C | -5.429621 | 0.133270  | 0.053572  |
| H | 3.550120  | -2.724891 | 1.118860  |
| H | 4.700417  | -2.833650 | -0.210422 |
| H | 4.996469  | -0.416247 | -0.286208 |
| H | 5.228414  | -0.931790 | 1.382621  |
| H | 3.151304  | -1.659394 | -1.713862 |
| H | 0.611162  | 0.952965  | 1.094608  |
| H | 0.942882  | 1.494673  | -1.879540 |
| H | -1.052702 | 0.123322  | -2.192446 |
| H | 1.049341  | -0.940545 | -2.362043 |
| H | 0.021626  | -2.032921 | -1.459671 |
| H | 2.875035  | -3.962017 | -1.352043 |
| H | 4.223313  | 0.641717  | 2.869884  |
| H | 2.641766  | 1.499481  | 2.440517  |
| H | -2.298859 | 2.520184  | -1.624921 |
| H | -1.880506 | 4.128597  | -0.778088 |
| H | 0.105841  | -1.190826 | 1.291248  |
| H | 1.704688  | -1.681516 | 1.849865  |
| H | 0.738722  | -2.778324 | 0.845217  |
| H | -2.916460 | -1.929785 | 1.290831  |
| H | -3.107950 | -0.199001 | 1.523832  |
| H | -4.965726 | -1.948658 | -0.164949 |
| H | -5.111618 | -2.543988 | 2.262924  |
| H | -5.401202 | -0.842829 | 2.665854  |
| H | -6.593482 | -1.743266 | 1.718798  |
| H | -6.503047 | 0.016861  | -0.124819 |
| H | -4.965371 | 0.428025  | -0.892061 |

H            -5.296702 0.948634 0.775394  
 ωB97XD energy = -1154.85226055 a.u.

(1R,5S,6R,7R,8S,10R)-3, Conf. A

|   |           |           |           |
|---|-----------|-----------|-----------|
| C | 4.300725  | -1.808885 | -0.384257 |
| C | 4.679051  | -0.360321 | -0.723570 |
| C | 3.748852  | 0.624846  | -0.058337 |
| C | 2.296075  | 0.342235  | -0.367456 |
| C | 1.898137  | -1.100074 | 0.121439  |
| C | 2.817981  | -2.079932 | -0.642012 |
| C | 1.267704  | 1.309181  | 0.177105  |
| C | -0.133898 | 0.979154  | -0.341220 |
| C | -0.578803 | -0.357236 | 0.207083  |
| C | 0.428603  | -1.421287 | -0.245081 |
| O | 1.455222  | 2.685859  | -0.201045 |
| C | 0.247419  | 3.316095  | -0.170076 |
| C | -0.830554 | 2.274972  | -0.058109 |
| O | 2.454622  | -3.400970 | -0.272397 |
| C | 4.184571  | 1.613327  | 0.722759  |
| C | -2.093528 | 2.568200  | 0.234408  |
| O | 0.136372  | 4.510251  | -0.244793 |
| H | 2.194792  | 0.348581  | -1.464964 |
| C | 2.089585  | -1.267958 | 1.641157  |
| O | -1.876111 | -0.648584 | -0.340882 |
| C | -2.655844 | -1.508327 | 0.348151  |
| O | -2.312319 | -2.032929 | 1.382667  |
| C | -3.991231 | -1.694396 | -0.327478 |
| C | -4.809891 | -0.392665 | -0.413629 |
| C | -6.116120 | -0.642700 | -1.169505 |
| C | -5.085246 | 0.184888  | 0.977327  |
| H | 4.524193  | -2.024041 | 0.666042  |
| H | 4.903808  | -2.498091 | -0.988812 |
| H | 4.611531  | -0.222008 | -1.812490 |
| H | 5.716936  | -0.162647 | -0.441556 |
| H | 2.618317  | -1.936881 | -1.718454 |
| H | 1.277815  | 1.280956  | 1.275098  |
| H | -0.059756 | 0.881304  | -1.435985 |
| H | -0.673649 | -0.327412 | 1.296547  |
| H | 0.335237  | -1.512223 | -1.335750 |
| H | 0.159613  | -2.387998 | 0.185734  |
| H | 3.038476  | -4.021641 | -0.716177 |
| H | 5.246845  | 1.744537  | 0.909226  |
| H | 3.514323  | 2.336958  | 1.173662  |
| H | -2.853397 | 1.798129  | 0.299741  |
| H | -2.379514 | 3.600779  | 0.410169  |
| H | 3.044877  | -0.863105 | 1.983037  |
| H | 2.045898  | -2.329849 | 1.894231  |
| H | 1.303541  | -0.765036 | 2.210101  |
| H | -3.813274 | -2.081072 | -1.337225 |
| H | -4.538167 | -2.452655 | 0.239845  |
| H | -4.216877 | 0.331737  | -0.985926 |
| H | -6.688312 | 0.284697  | -1.271230 |
| H | -5.929016 | -1.035700 | -2.174010 |
| H | -6.742766 | -1.365773 | -0.634383 |
| H | -4.163798 | 0.366061  | 1.541193  |

H -5.696927 -0.505799 1.568785  
H -5.624558 1.134478 0.902963  
ωB97XD energy = -1154.85360791 a.u.

(1R,5S,6R,7R,8S,10R)-3, Conf. B

|   |           |           |           |
|---|-----------|-----------|-----------|
| C | 2.993712  | -3.102520 | -0.297113 |
| C | 3.948706  | -2.021774 | -0.823417 |
| C | 3.644388  | -0.672269 | -0.218006 |
| C | 2.197917  | -0.272228 | -0.402431 |
| C | 1.244077  | -1.329965 | 0.268507  |
| C | 1.532203  | -2.675994 | -0.433488 |
| C | 1.781245  | 1.094020  | 0.097285  |
| C | 0.337201  | 1.413753  | -0.295961 |
| C | -0.609020 | 0.472468  | 0.410692  |
| C | -0.239738 | -0.965524 | 0.027476  |
| O | 2.528924  | 2.204220  | -0.433809 |
| C | 1.747279  | 3.320349  | -0.383242 |
| C | 0.333948  | 2.898100  | -0.094985 |
| O | 0.647938  | -3.647962 | 0.102863  |
| C | 4.562892  | 0.056034  | 0.416756  |
| C | -0.623665 | 3.746554  | 0.265368  |
| O | 2.182206  | 4.425125  | -0.567614 |
| H | 1.994005  | -0.297616 | -1.485252 |
| C | 1.497379  | -1.456358 | 1.782899  |
| O | -1.941286 | 0.754068  | -0.053115 |
| C | -2.959920 | 0.385817  | 0.749975  |
| O | -2.801698 | -0.078152 | 1.856677  |
| C | -4.299305 | 0.585567  | 0.088668  |
| C | -4.999004 | -0.765396 | -0.160604 |
| C | -6.389476 | -0.532748 | -0.753336 |
| C | -4.157694 | -1.668862 | -1.066462 |
| H | 3.204996  | -3.316746 | 0.755983  |
| H | 3.150760  | -4.036538 | -0.851344 |
| H | 3.834265  | -1.947803 | -1.914686 |
| H | 4.987289  | -2.304109 | -0.630056 |
| H | 1.308244  | -2.534683 | -1.505308 |
| H | 1.891826  | 1.137416  | 1.189184  |
| H | 0.246553  | 1.228577  | -1.378078 |
| H | -0.585176 | 0.623563  | 1.493766  |
| H | -0.476281 | -1.085836 | -1.038338 |
| H | -0.870259 | -1.664966 | 0.581424  |
| H | 0.839121  | -4.499845 | -0.298234 |
| H | 5.580939  | -0.308824 | 0.522221  |
| H | 4.349292  | 1.037504  | 0.825552  |
| H | -1.634652 | 3.406083  | 0.461438  |
| H | -0.400990 | 4.804370  | 0.365981  |
| H | 1.087144  | -0.608835 | 2.337436  |
| H | 2.563088  | -1.512965 | 2.016320  |
| H | 1.007921  | -2.358605 | 2.156827  |
| H | -4.912654 | 1.195910  | 0.759507  |
| H | -4.170510 | 1.124163  | -0.855043 |
| H | -5.110441 | -1.257562 | 0.812993  |
| H | -6.319069 | -0.037398 | -1.729120 |
| H | -6.911787 | -1.483450 | -0.898839 |
| H | -7.005010 | 0.093921  | -0.099766 |
| H | -3.982479 | -1.190255 | -2.037412 |

H -4.669696 -2.619164 -1.246141  
H -3.183863 -1.898835 -0.622526  
ωB97XD energy = -1154.85327460 a.u.

(1R,5S,6R,7R,8S,10R)-3, Conf. C

|   |           |           |           |
|---|-----------|-----------|-----------|
| C | 3.263044  | -2.854071 | -0.404638 |
| C | 4.071866  | -1.675417 | -0.964721 |
| C | 3.654425  | -0.367690 | -0.336100 |
| C | 2.165748  | -0.124260 | -0.442374 |
| C | 1.367379  | -1.280611 | 0.268572  |
| C | 1.759321  | -2.584586 | -0.462213 |
| C | 1.635816  | 1.189343  | 0.090360  |
| C | 0.146221  | 1.353764  | -0.215971 |
| C | -0.650126 | 0.315502  | 0.538408  |
| C | -0.158554 | -1.072740 | 0.112814  |
| O | 2.229741  | 2.373225  | -0.475887 |
| C | 1.337637  | 3.399332  | -0.374213 |
| C | -0.002813 | 2.829009  | -0.004919 |
| O | 1.013090  | -3.647868 | 0.109425  |
| C | 4.519600  | 0.456228  | 0.255286  |
| C | -1.020377 | 3.572325  | 0.418089  |
| O | 1.639434  | 4.544042  | -0.579703 |
| H | 1.908808  | -0.167342 | -1.513311 |
| C | 1.716455  | -1.386066 | 1.765593  |
| O | -2.029741 | 0.470300  | 0.168304  |
| C | -2.959770 | 0.011363  | 1.031900  |
| O | -2.689236 | -0.461788 | 2.111607  |
| C | -4.346683 | 0.168607  | 0.462010  |
| C | -4.543779 | -0.584899 | -0.866732 |
| C | -4.250299 | -2.078559 | -0.705714 |
| C | -5.962184 | -0.352640 | -1.390321 |
| H | 3.548180  | -3.051753 | 0.634132  |
| H | 3.489186  | -3.762648 | -0.977131 |
| H | 3.901506  | -1.610929 | -2.049235 |
| H | 5.142044  | -1.846879 | -0.819776 |
| H | 1.465691  | -2.463491 | -1.519596 |
| H | 1.803084  | 1.244122  | 1.174444  |
| H | 0.012037  | 1.161320  | -1.292321 |
| H | -0.567546 | 0.460923  | 1.619364  |
| H | -0.438951 | -1.206180 | -0.940900 |
| H | -0.682093 | -1.840331 | 0.687787  |
| H | 1.280064  | -4.474078 | -0.302005 |
| H | 5.575936  | 0.207201  | 0.307076  |
| H | 4.219439  | 1.408360  | 0.678872  |
| H | -1.976459 | 3.128683  | 0.673277  |
| H | -0.901617 | 4.647407  | 0.511837  |
| H | 1.249431  | -0.590238 | 2.351023  |
| H | 2.793179  | -1.327152 | 1.940289  |
| H | 1.347641  | -2.337229 | 2.156650  |
| H | -5.050286 | -0.193496 | 1.216835  |
| H | -4.532412 | 1.237741  | 0.305293  |
| H | -3.833769 | -0.169495 | -1.591802 |
| H | -3.217892 | -2.260032 | -0.388638 |
| H | -4.913666 | -2.526671 | 0.043096  |
| H | -4.403980 | -2.605812 | -1.652368 |
| H | -6.110035 | -0.857135 | -2.350208 |

H -6.164831 0.713524 -1.535894  
H -6.706551 -0.745274 -0.687442  
ωB97XD energy = -1154.85315857 a.u.

(1R,5S,6R,7R,8S,10R)-3, Conf. D

|   |           |           |           |
|---|-----------|-----------|-----------|
| C | 3.944914  | -2.442507 | -0.242268 |
| C | 4.630005  | -1.107070 | -0.564073 |
| C | 3.889439  | 0.056823  | 0.049214  |
| C | 2.426663  | 0.075286  | -0.333721 |
| C | 1.716242  | -1.250263 | 0.132755  |
| C | 2.453861  | -2.407532 | -0.578108 |
| C | 1.590652  | 1.235824  | 0.160767  |
| C | 0.181506  | 1.195605  | -0.432569 |
| C | -0.557726 | -0.017585 | 0.079980  |
| C | 0.233642  | -1.269674 | -0.314057 |
| O | 2.071616  | 2.545242  | -0.197345 |
| C | 1.015408  | 3.407391  | -0.218771 |
| C | -0.254319 | 2.604498  | -0.170894 |
| O | 1.808175  | -3.620954 | -0.224379 |
| C | 4.480306  | 0.947413  | 0.846030  |
| C | -1.446581 | 3.140481  | 0.070492  |
| O | 1.152354  | 4.599188  | -0.286039 |
| H | 2.383860  | 0.092002  | -1.434983 |
| C | 1.789565  | -1.435064 | 1.660697  |
| O | -1.849646 | -0.035090 | -0.551930 |
| C | -2.839042 | -0.695259 | 0.082725  |
| O | -2.691808 | -1.249769 | 1.147706  |
| C | -4.114135 | -0.658513 | -0.724787 |
| C | -5.382285 | -0.913946 | 0.095135  |
| C | -5.614141 | 0.197021  | 1.122604  |
| C | -6.585174 | -1.053332 | -0.840824 |
| H | 4.065284  | -2.683773 | 0.819208  |
| H | 4.423751  | -3.250162 | -0.810357 |
| H | 4.651299  | -0.971679 | -1.655222 |
| H | 5.669648  | -1.122925 | -0.225093 |
| H | 2.342644  | -2.241828 | -1.663906 |
| H | 1.536335  | 1.211489  | 1.257489  |
| H | 0.291757  | 1.083320  | -1.522865 |
| H | -0.712209 | 0.039097  | 1.161543  |
| H | 0.183117  | -1.353936 | -1.408072 |
| H | -0.250334 | -2.156082 | 0.101929  |
| H | 2.276480  | -4.354623 | -0.631143 |
| H | 5.536547  | 0.858818  | 1.084920  |
| H | 3.953037  | 1.800488  | 1.258734  |
| H | -2.345706 | 2.534137  | 0.094323  |
| H | -1.533979 | 4.208493  | 0.245038  |
| H | 1.089283  | -0.781268 | 2.186548  |
| H | 2.787218  | -1.222337 | 2.051866  |
| H | 1.526534  | -2.465076 | 1.912298  |
| H | -4.171465 | 0.302960  | -1.248182 |
| H | -4.004599 | -1.423346 | -1.505165 |
| H | -5.244405 | -1.857770 | 0.635120  |
| H | -6.527972 | 0.009372  | 1.694904  |
| H | -4.784621 | 0.264932  | 1.831679  |
| H | -5.728792 | 1.167809  | 0.623850  |
| H | -7.496065 | -1.270948 | -0.274668 |

H -6.440239 -1.859668 -1.567701  
H -6.754746 -0.124001 -1.398156  
ωB97XD energy = -1154.85299390 a.u.

(1R,5S,6R,7R,8S,10R)-3, Conf. E

|   |           |           |           |
|---|-----------|-----------|-----------|
| C | 3.452586  | -2.867085 | -0.336533 |
| C | 4.324964  | -1.663693 | -0.720669 |
| C | 3.825775  | -0.392257 | -0.078192 |
| C | 2.365321  | -0.133232 | -0.371366 |
| C | 1.476547  | -1.322235 | 0.154741  |
| C | 1.969634  | -2.588166 | -0.582340 |
| C | 1.764590  | 1.151199  | 0.157554  |
| C | 0.334575  | 1.343199  | -0.350177 |
| C | -0.563580 | 0.269635  | 0.217266  |
| C | -0.012289 | -1.097209 | -0.204087 |
| O | 2.431765  | 2.361974  | -0.247489 |
| C | 1.532683  | 3.386538  | -0.215934 |
| C | 0.154084  | 2.804541  | -0.077441 |
| O | 1.156188  | -3.677119 | -0.173715 |
| C | 4.601954  | 0.390222  | 0.671805  |
| C | -0.914818 | 3.529379  | 0.237058  |
| O | 1.859050  | 4.539249  | -0.307414 |
| H | 2.257044  | -0.113010 | -1.468026 |
| C | 1.610402  | -1.511064 | 1.678231  |
| O | -1.873455 | 0.450928  | -0.349362 |
| C | -2.925623 | 0.011650  | 0.370224  |
| O | -2.817791 | -0.510719 | 1.455967  |
| C | -4.224684 | 0.303560  | -0.341989 |
| C | -5.397608 | -0.567705 | 0.116909  |
| C | -6.702334 | -0.047224 | -0.490464 |
| C | -5.170659 | -2.037744 | -0.244496 |
| H | 3.598112  | -3.119372 | 0.719087  |
| H | 3.755877  | -3.745053 | -0.921016 |
| H | 4.294750  | -1.537773 | -1.812796 |
| H | 5.368465  | -1.848162 | -0.450754 |
| H | 1.820886  | -2.411087 | -1.661871 |
| H | 1.775473  | 1.140485  | 1.255709  |
| H | 0.358960  | 1.214263  | -1.443937 |
| H | -0.649090 | 0.355607  | 1.304248  |
| H | -0.140770 | -1.176220 | -1.291949 |
| H | -0.611561 | -1.889738 | 0.250090  |
| H | 1.471228  | -4.479407 | -0.598219 |
| H | 5.642553  | 0.133058  | 0.849222  |
| H | 4.244897  | 1.317882  | 1.105750  |
| H | -1.896995 | 3.078677  | 0.328103  |
| H | -0.812324 | 4.596884  | 0.406379  |
| H | 1.060911  | -0.748155 | 2.235669  |
| H | 2.651152  | -1.465390 | 2.007480  |
| H | 1.194598  | -2.481530 | 1.958733  |
| H | -4.443821 | 1.364268  | -0.158870 |
| H | -4.061849 | 0.208270  | -1.421426 |
| H | -5.462472 | -0.488780 | 1.208307  |
| H | -7.554572 | -0.643074 | -0.149542 |
| H | -6.888400 | 0.995826  | -0.213218 |
| H | -6.673354 | -0.104265 | -1.585477 |
| H | -4.264447 | -2.429700 | 0.225494  |

H -5.078213 -2.160046 -1.330904  
H -6.012212 -2.652827 0.089236  
ωB97XD energy = -1154.85286744 a.u.

(1R,5S,6R,7R,8S,10R)-3, Conf. F

|   |           |           |           |
|---|-----------|-----------|-----------|
| C | 2.787066  | -3.193587 | -0.266518 |
| C | 3.799084  | -2.153009 | -0.766292 |
| C | 3.542887  | -0.796433 | -0.154813 |
| C | 2.120814  | -0.328946 | -0.368287 |
| C | 1.103844  | -1.347829 | 0.269108  |
| C | 1.349395  | -2.701842 | -0.433868 |
| C | 1.754724  | 1.050589  | 0.135102  |
| C | 0.336977  | 1.439809  | -0.288792 |
| C | -0.669345 | 0.534760  | 0.381796  |
| C | -0.354279 | -0.914028 | -0.010210 |
| O | 2.565214  | 2.129242  | -0.368320 |
| C | 1.834617  | 3.279707  | -0.325917 |
| C | 0.397319  | 2.920848  | -0.072316 |
| O | 0.410914  | -3.636668 | 0.076022  |
| C | 4.478080  | -0.116786 | 0.508886  |
| C | -0.526636 | 3.810585  | 0.275927  |
| O | 2.323553  | 4.364683  | -0.491603 |
| H | 1.941473  | -0.334737 | -1.455795 |
| C | 1.310863  | -1.495335 | 1.788721  |
| O | -1.973031 | 0.887670  | -0.110514 |
| C | -3.031666 | 0.546850  | 0.654415  |
| O | -2.922787 | 0.046060  | 1.751353  |
| C | -4.335350 | 0.836080  | -0.044088 |
| C | -4.936896 | -0.424617 | -0.713358 |
| C | -3.983257 | -1.034946 | -1.744217 |
| C | -5.383834 | -1.466698 | 0.314191  |
| H | 2.965985  | -3.420608 | 0.789862  |
| H | 2.915337  | -4.131249 | -0.821947 |
| H | 3.708789  | -2.065999 | -1.858847 |
| H | 4.820024  | -2.483407 | -0.555750 |
| H | 1.156746  | -2.546143 | -1.509781 |
| H | 1.841404  | 1.080006  | 1.229605  |
| H | 0.265136  | 1.270095  | -1.374892 |
| H | -0.666110 | 0.671262  | 1.467186  |
| H | -0.561529 | -1.009260 | -1.084750 |
| H | -1.033157 | -1.591232 | 0.513223  |
| H | 0.575223  | -4.494590 | -0.324047 |
| H | 5.475762  | -0.528390 | 0.634423  |
| H | 4.298132  | 0.869681  | 0.922055  |
| H | -1.556785 | 3.518749  | 0.448690  |
| H | -0.255402 | 4.855577  | 0.390870  |
| H | 2.366732  | -1.598649 | 2.049280  |
| H | 0.774345  | -2.378940 | 2.141933  |
| H | 0.922187  | -0.635421 | 2.339588  |
| H | -5.034447 | 1.214378  | 0.707031  |
| H | -4.173118 | 1.608258  | -0.800863 |
| H | -5.828353 | -0.069690 | -1.245877 |
| H | -3.634993 | -0.287863 | -2.464428 |
| H | -3.102080 | -1.469884 | -1.259387 |
| H | -4.482757 | -1.836754 | -2.296864 |
| H | -4.533383 | -1.846549 | 0.888674  |

H -5.862548 -2.313929 -0.187245  
H -6.099941 -1.043622 1.025734  
ωB97XD energy = -1154.85238320 a.u.

(1R,5S,6R,7R,8S,10R)-3, Conf. G

|   |           |           |           |
|---|-----------|-----------|-----------|
| C | 4.415910  | -1.706729 | -0.496066 |
| C | 4.665547  | -0.264808 | -0.959149 |
| C | 3.731465  | 0.704926  | -0.276545 |
| C | 2.276933  | 0.316694  | -0.429655 |
| C | 2.022078  | -1.113196 | 0.172490  |
| C | 2.939171  | -2.083052 | -0.606119 |
| C | 1.250701  | 1.250834  | 0.170850  |
| C | -0.184766 | 0.823250  | -0.151026 |
| C | -0.495620 | -0.542236 | 0.429349  |
| C | 0.557031  | -1.539845 | -0.064382 |
| O | 1.305221  | 2.606383  | -0.315822 |
| C | 0.077017  | 3.174856  | -0.148298 |
| C | -0.895440 | 2.091638  | 0.224577  |
| O | 2.695484  | -3.396981 | -0.126188 |
| C | 4.169079  | 1.767850  | 0.398790  |
| C | -2.042353 | 2.347783  | 0.846592  |
| O | -0.117563 | 4.351529  | -0.293790 |
| H | 2.069355  | 0.251768  | -1.510071 |
| C | 2.341264  | -1.171269 | 1.678500  |
| O | -1.751554 | -1.016461 | -0.095974 |
| C | -2.814267 | -1.108843 | 0.722086  |
| O | -2.804665 | -0.754732 | 1.881368  |
| C | -4.022675 | -1.670227 | 0.016882  |
| C | -5.071929 | -0.578802 | -0.278274 |
| C | -4.553027 | 0.435494  | -1.300890 |
| C | -6.371909 | -1.224151 | -0.761917 |
| H | 4.739984  | -1.834949 | 0.542206  |
| H | 5.011455  | -2.398023 | -1.105680 |
| H | 4.498340  | -0.205836 | -2.044475 |
| H | 5.707660  | 0.015233  | -0.782112 |
| H | 2.642436  | -2.024390 | -1.667859 |
| H | 1.389345  | 1.301095  | 1.259211  |
| H | -0.248359 | 0.725091  | -1.247035 |
| H | -0.569687 | -0.505411 | 1.519157  |
| H | 0.391012  | -1.676668 | -1.141093 |
| H | 0.384985  | -2.510952 | 0.406784  |
| H | 3.277667  | -4.009160 | -0.583777 |
| H | 5.233245  | 1.970756  | 0.481445  |
| H | 3.496497  | 2.480687  | 0.862915  |
| H | -2.703534 | 1.560332  | 1.191321  |
| H | -2.317753 | 3.379354  | 1.045156  |
| H | 3.287622  | -0.679593 | 1.916055  |
| H | 2.400770  | -2.214922 | 1.996369  |
| H | 1.566515  | -0.687887 | 2.279323  |
| H | -3.719724 | -2.160904 | -0.912861 |
| H | -4.456646 | -2.419395 | 0.686127  |
| H | -5.274707 | -0.057838 | 0.666048  |
| H | -4.342201 | -0.056835 | -2.257588 |
| H | -5.298308 | 1.216255  | -1.481689 |
| H | -3.632392 | 0.925143  | -0.970262 |
| H | -6.209452 | -1.769353 | -1.699383 |

H -7.136499 -0.463435 -0.947695  
H -6.768279 -1.929083 -0.024038  
ωB97XD energy = -1154.85219585 a.u.

(1R,5S,6R,7R,8S,10R)-3, Conf. H

|   |           |           |           |
|---|-----------|-----------|-----------|
| C | 2.887308  | -3.076334 | -0.323927 |
| C | 3.825115  | -1.985887 | -0.861129 |
| C | 3.524951  | -0.641911 | -0.241365 |
| C | 2.072224  | -0.250141 | -0.391928 |
| C | 1.140440  | -1.318453 | 0.292969  |
| C | 1.420703  | -2.657409 | -0.425359 |
| C | 1.658420  | 1.110551  | 0.125087  |
| C | 0.202757  | 1.422759  | -0.229802 |
| C | -0.716710 | 0.471217  | 0.498248  |
| C | -0.350491 | -0.960653 | 0.088959  |
| O | 2.385620  | 2.228245  | -0.418341 |
| C | 1.598262  | 3.338958  | -0.342653 |
| C | 0.195130  | 2.906113  | -0.021870 |
| O | 0.553873  | -3.638443 | 0.122571  |
| C | 4.452028  | 0.089061  | 0.377680  |
| C | -0.759164 | 3.746973  | 0.364248  |
| O | 2.021272  | 4.447475  | -0.532216 |
| H | 1.844936  | -0.270142 | -1.470280 |
| C | 1.428962  | -1.454825 | 1.800125  |
| O | -2.063904 | 0.755128  | 0.085332  |
| C | -3.054656 | 0.329891  | 0.897954  |
| O | -2.852929 | -0.172538 | 1.980269  |
| C | -4.412822 | 0.528701  | 0.275233  |
| C | -4.778343 | -0.573822 | -0.750697 |
| C | -4.005857 | -0.441816 | -2.065556 |
| C | -4.624391 | -1.976288 | -0.156306 |
| H | 3.121886  | -3.298257 | 0.722645  |
| H | 3.037815  | -4.004763 | -0.889209 |
| H | 3.689479  | -1.905416 | -1.949475 |
| H | 4.868870  | -2.263040 | -0.689391 |
| H | 1.172926  | -2.509537 | -1.491057 |
| H | 1.795026  | 1.149035  | 1.214238  |
| H | 0.084601  | 1.241886  | -1.309992 |
| H | -0.654646 | 0.611316  | 1.581400  |
| H | -0.607292 | -1.069444 | -0.973613 |
| H | -0.965512 | -1.670636 | 0.646553  |
| H | 0.743356  | -4.486986 | -0.286338 |
| H | 5.474538  | -0.269264 | 0.459643  |
| H | 4.240491  | 1.066890  | 0.796222  |
| H | -1.762829 | 3.398586  | 0.582747  |
| H | -0.540914 | 4.805839  | 0.463631  |
| H | 1.027318  | -0.613986 | 2.370690  |
| H | 2.500006  | -1.507111 | 2.008430  |
| H | 0.952839  | -2.362462 | 2.178192  |
| H | -5.136213 | 0.515722  | 1.093656  |
| H | -4.449161 | 1.507060  | -0.214159 |
| H | -5.841301 | -0.414436 | -0.971837 |
| H | -4.126111 | 0.554383  | -2.503313 |
| H | -2.935637 | -0.612198 | -1.915322 |
| H | -4.366567 | -1.177483 | -2.791556 |
| H | -3.570653 | -2.213896 | 0.028782  |

H -5.016969 -2.728575 -0.847398  
H -5.154922 -2.072139 0.795720  
ωB97XD energy = -1154.85202117 a.u.

(1R,5S,6R,7R,8S,10R)-3, Conf. I

|   |           |           |           |
|---|-----------|-----------|-----------|
| C | 4.075116  | -2.177630 | -0.204601 |
| C | 4.660081  | -0.777468 | -0.439498 |
| C | 3.791507  | 0.297676  | 0.168341  |
| C | 2.353342  | 0.206529  | -0.289414 |
| C | 1.739099  | -1.189634 | 0.099682  |
| C | 2.604317  | -2.252950 | -0.613666 |
| C | 1.397898  | 1.273635  | 0.198209  |
| C | 0.023045  | 1.136016  | -0.460570 |
| C | -0.628372 | -0.153229 | -0.016158 |
| C | 0.286297  | -1.317093 | -0.417293 |
| O | 1.782203  | 2.629146  | -0.098629 |
| C | 0.659769  | 3.401153  | -0.145870 |
| C | -0.539051 | 2.495861  | -0.178543 |
| O | 2.048386  | -3.529074 | -0.336004 |
| C | 4.262640  | 1.206218  | 1.022701  |
| C | -1.781200 | 2.924059  | 0.022168  |
| O | 0.699419  | 4.601816  | -0.173738 |
| H | 2.362762  | 0.258772  | -1.390305 |
| C | 1.760094  | -1.425649 | 1.622293  |
| O | -1.889819 | -0.271969 | -0.699015 |
| C | -2.803967 | -1.100643 | -0.152041 |
| O | -2.618270 | -1.694023 | 0.887045  |
| C | -4.060143 | -1.176342 | -0.986657 |
| C | -5.312821 | -0.623720 | -0.269719 |
| C | -5.762503 | -1.501586 | 0.900562  |
| C | -5.108643 | 0.827959  | 0.170189  |
| H | 4.165217  | -2.453840 | 0.851314  |
| H | 4.647758  | -2.916625 | -0.779197 |
| H | 4.730988  | -0.598901 | -1.522265 |
| H | 5.676575  | -0.719339 | -0.040390 |
| H | 2.529951  | -2.054783 | -1.697242 |
| H | 1.296638  | 1.207801  | 1.289968  |
| H | 0.188610  | 1.068981  | -1.547562 |
| H | -0.825655 | -0.146961 | 1.059880  |
| H | 0.292687  | -1.360292 | -1.514830 |
| H | -0.136728 | -2.257209 | -0.057318 |
| H | 2.597194  | -4.204321 | -0.743367 |
| H | 5.308812  | 1.199823  | 1.316081  |
| H | 3.642533  | 1.996557  | 1.431562  |
| H | -2.624189 | 2.243252  | -0.012047 |
| H | -1.964488 | 3.975480  | 0.221666  |
| H | 2.718254  | -1.147999 | 2.067549  |
| H | 1.571441  | -2.482401 | 1.825044  |
| H | 0.985428  | -0.851748 | 2.137022  |
| H | -3.896008 | -0.634883 | -1.921541 |
| H | -4.219051 | -2.233222 | -1.226318 |
| H | -6.107496 | -0.637219 | -1.026361 |
| H | -5.943177 | -2.531431 | 0.576177  |
| H | -5.003953 | -1.530269 | 1.687196  |
| H | -6.691957 | -1.112873 | 1.329182  |
| H | -4.346790 | 0.893005  | 0.956716  |

H -6.034293 1.244056 0.579067  
H -4.795428 1.460437 -0.667637  
ωB97XD energy = -1154.85171890 a.u.

(1R,5S,6R,7R,8S,10R)-3, Conf. J

|   |           |           |           |
|---|-----------|-----------|-----------|
| C | 4.262647  | -1.750173 | -0.403554 |
| C | 4.607153  | -0.298130 | -0.762993 |
| C | 3.672701  | 0.675548  | -0.086673 |
| C | 2.218302  | 0.365909  | -0.362872 |
| C | 1.857634  | -1.081170 | 0.139391  |
| C | 2.781472  | -2.048574 | -0.634678 |
| C | 1.187201  | 1.313810  | 0.208322  |
| C | -0.226359 | 0.965211  | -0.265922 |
| C | -0.638145 | -0.390342 | 0.260101  |
| C | 0.390932  | -1.428083 | -0.205294 |
| O | 1.338941  | 2.693645  | -0.177564 |
| C | 0.123524  | 3.304101  | -0.092114 |
| C | -0.927194 | 2.243471  | 0.081532  |
| O | 2.446710  | -3.373860 | -0.252881 |
| C | 4.107677  | 1.677204  | 0.677956  |
| C | -2.156640 | 2.508695  | 0.510507  |
| O | -0.011612 | 4.495729  | -0.164966 |
| H | 2.090482  | 0.367956  | -1.457585 |
| C | 2.076049  | -1.236718 | 1.656671  |
| O | -1.914168 | -0.721638 | -0.318580 |
| C | -2.699181 | -1.581934 | 0.364424  |
| O | -2.420884 | -1.999013 | 1.465880  |
| C | -3.943541 | -1.951756 | -0.408292 |
| C | -4.994885 | -0.824359 | -0.532115 |
| C | -5.330377 | -0.221718 | 0.834353  |
| C | -4.604972 | 0.247524  | -1.553445 |
| H | 4.507334  | -1.950827 | 0.644928  |
| H | 4.868217  | -2.433893 | -1.011860 |
| H | 4.514642  | -0.170904 | -1.851439 |
| H | 5.646762  | -0.078811 | -0.504277 |
| H | 2.561827  | -1.914289 | -1.708338 |
| H | 1.230759  | 1.287460  | 1.305503  |
| H | -0.189336 | 0.897332  | -1.364975 |
| H | -0.746728 | -0.380749 | 1.348068  |
| H | 0.284795  | -1.517658 | -1.294807 |
| H | 0.146351  | -2.402269 | 0.224595  |
| H | 3.038098  | -3.986298 | -0.698125 |
| H | 5.171246  | 1.826715  | 0.841818  |
| H | 3.435346  | 2.393252  | 1.137624  |
| H | -2.893113 | 1.725702  | 0.649521  |
| H | -2.441510 | 3.533113  | 0.730035  |
| H | 1.283029  | -0.755491 | 2.234761  |
| H | 3.023642  | -0.801027 | 1.981863  |
| H | 2.069307  | -2.298258 | 1.914998  |
| H | -3.644413 | -2.281704 | -1.409022 |
| H | -4.381010 | -2.802397 | 0.119128  |
| H | -5.900380 | -1.317520 | -0.907808 |
| H | -4.461700 | 0.279945  | 1.275972  |
| H | -6.130959 | 0.518876  | 0.745582  |
| H | -5.651764 | -0.991360 | 1.542800  |
| H | -5.401105 | 0.993187  | -1.645787 |

H -4.440465 -0.194907 -2.541409  
H -3.685239 0.764827 -1.268698  
ωB97XD energy = -1154.85129595 a.u.

(1R,5S,6R,7R,8S,10R)-3, Conf. K

|   |           |           |           |
|---|-----------|-----------|-----------|
| C | 4.293216  | -1.782900 | -0.540136 |
| C | 4.635853  | -0.320967 | -0.860260 |
| C | 3.729389  | 0.637055  | -0.126686 |
| C | 2.266823  | 0.346037  | -0.375490 |
| C | 1.905752  | -1.107517 | 0.108671  |
| C | 2.802524  | -2.073844 | -0.713190 |
| C | 1.256813  | 1.299361  | 0.225294  |
| C | -0.168396 | 0.959214  | -0.214262 |
| C | -0.569964 | -0.395413 | 0.320952  |
| C | 0.426947  | -1.435420 | -0.200354 |
| O | 1.404804  | 2.680619  | -0.155582 |
| C | 0.193417  | 3.295242  | -0.033872 |
| C | -0.858400 | 2.237214  | 0.152470  |
| O | 2.506278  | -3.436455 | -0.458925 |
| C | 4.189621  | 1.610947  | 0.658646  |
| C | -2.084606 | 2.501162  | 0.592258  |
| O | 0.061800  | 4.487888  | -0.091665 |
| H | 2.116970  | 0.363161  | -1.467316 |
| C | 2.161221  | -1.288080 | 1.616167  |
| O | -1.879764 | -0.698467 | -0.189114 |
| C | -2.678211 | -1.477204 | 0.569411  |
| O | -2.342341 | -1.918849 | 1.645213  |
| C | -4.026973 | -1.699191 | -0.068820 |
| C | -4.892448 | -0.420582 | -0.175087 |
| C | -4.515228 | 0.442710  | -1.382320 |
| C | -6.372770 | -0.808103 | -0.235493 |
| H | 4.592418  | -2.009065 | 0.492118  |
| H | 4.857549  | -2.457480 | -1.191466 |
| H | 4.511420  | -0.160268 | -1.940745 |
| H | 5.684545  | -0.116751 | -0.626861 |
| H | 2.542051  | -1.931487 | -1.770526 |
| H | 1.326116  | 1.269039  | 1.320972  |
| H | -0.160184 | 0.893354  | -1.314115 |
| H | -0.622641 | -0.393255 | 1.413204  |
| H | 0.288251  | -1.500936 | -1.287682 |
| H | 0.184050  | -2.417740 | 0.212149  |
| H | 2.949932  | -3.710461 | 0.349391  |
| H | 5.257640  | 1.750349  | 0.800844  |
| H | 3.533112  | 2.315274  | 1.158116  |
| H | -2.821210 | 1.717270  | 0.730233  |
| H | -2.366484 | 3.524692  | 0.819775  |
| H | 3.168413  | -0.980010 | 1.905882  |
| H | 2.016181  | -2.336281 | 1.896271  |
| H | 1.462082  | -0.711688 | 2.226772  |
| H | -3.884392 | -2.126216 | -1.068738 |
| H | -4.531307 | -2.443707 | 0.550791  |
| H | -4.740277 | 0.165796  | 0.742020  |
| H | -3.454908 | 0.703494  | -1.385588 |
| H | -4.730999 | -0.095200 | -2.313348 |
| H | -5.097537 | 1.369726  | -1.389791 |
| H | -6.681326 | -1.354070 | 0.661432  |

H -6.569677 -1.445642 -1.105682  
H -7.003475 0.081898 -0.324930  
ωB97XD energy = -1154.85120326 a.u.

(1R,5S,6R,7R,8S,10R)-3, Conf. L

|   |           |           |           |
|---|-----------|-----------|-----------|
| C | 3.632449  | -2.715404 | -0.201621 |
| C | 4.465170  | -1.455006 | -0.475030 |
| C | 3.827748  | -0.230145 | 0.135650  |
| C | 2.391385  | -0.049647 | -0.300645 |
| C | 1.527618  | -1.300344 | 0.112203  |
| C | 2.167988  | -2.518042 | -0.591555 |
| C | 1.662796  | 1.184182  | 0.186654  |
| C | 0.280858  | 1.303254  | -0.459044 |
| C | -0.599023 | 0.164844  | 0.001822  |
| C | 0.071734  | -1.155687 | -0.392687 |
| O | 2.290972  | 2.442259  | -0.125113 |
| C | 1.331772  | 3.410389  | -0.165322 |
| C | -0.015524 | 2.744568  | -0.180943 |
| O | 1.385138  | -3.661708 | -0.284585 |
| C | 4.477026  | 0.574608  | 0.977029  |
| C | -1.154104 | 3.396705  | 0.031656  |
| O | 1.594131  | 4.582411  | -0.200485 |
| H | 2.393697  | -0.010131 | -1.402135 |
| C | 1.518485  | -1.516122 | 1.637837  |
| O | -1.865074 | 0.288713  | -0.668127 |
| C | -2.939839 | -0.260373 | -0.062365 |
| O | -2.876200 | -0.826752 | 1.004441  |
| C | -4.175091 | -0.048039 | -0.908391 |
| C | -5.508449 | -0.507735 | -0.302581 |
| C | -5.571582 | -2.025138 | -0.102489 |
| C | -5.851245 | 0.249678  | 0.984350  |
| H | 3.686448  | -2.982173 | 0.859198  |
| H | 4.045393  | -3.561019 | -0.766013 |
| H | 4.541184  | -1.306452 | -1.561934 |
| H | 5.483785  | -1.585444 | -0.099120 |
| H | 2.117050  | -2.326610 | -1.677649 |
| H | 1.562998  | 1.146519  | 1.279825  |
| H | 0.420581  | 1.200175  | -1.546826 |
| H | -0.779980 | 0.218729  | 1.079231  |
| H | 0.058467  | -1.211691 | -1.489605 |
| H | -0.519052 | -1.994726 | -0.018223 |
| H | 1.790089  | -4.434947 | -0.686099 |
| H | 5.508156  | 0.370854  | 1.252209  |
| H | 4.025864  | 1.468580  | 1.393179  |
| H | -2.110745 | 2.886209  | 0.010193  |
| H | -1.136355 | 4.464405  | 0.228099  |
| H | 2.514921  | -1.411094 | 2.073279  |
| H | 1.142002  | -2.517817 | 1.857371  |
| H | 0.865275  | -0.804169 | 2.148460  |
| H | -4.215424 | 1.020557  | -1.151872 |
| H | -3.992509 | -0.558754 | -1.862188 |
| H | -6.265975 | -0.242538 | -1.052238 |
| H | -4.850974 | -2.350581 | 0.651998  |
| H | -6.571597 | -2.323469 | 0.228298  |
| H | -5.356710 | -2.556112 | -1.036524 |
| H | -6.862170 | -0.003475 | 1.319041  |

H -5.813767 1.333744 0.828004  
H -5.153418 -0.007245 1.785819  
ωB97XD energy = -1154.85097809 a.u.

(1R,5S,6R,7R,8S,10R)-3, Conf. M

|   |           |           |           |
|---|-----------|-----------|-----------|
| C | 3.436864  | -2.871608 | -0.228047 |
| C | 4.337400  | -1.667511 | -0.537735 |
| C | 3.796343  | -0.400801 | 0.079935  |
| C | 2.361268  | -0.133992 | -0.314034 |
| C | 1.434014  | -1.324559 | 0.136145  |
| C | 1.975229  | -2.586296 | -0.573661 |
| C | 1.727628  | 1.147641  | 0.182630  |
| C | 0.337319  | 1.347733  | -0.423225 |
| C | -0.599935 | 0.271989  | 0.072974  |
| C | -0.024764 | -1.091690 | -0.327207 |
| O | 2.424618  | 2.359760  | -0.163023 |
| C | 1.528099  | 3.386629  | -0.186776 |
| C | 0.141489  | 2.807893  | -0.154242 |
| O | 1.133570  | -3.676375 | -0.230034 |
| C | 4.518574  | 0.369603  | 0.893579  |
| C | -0.946511 | 3.534466  | 0.080915  |
| O | 1.863017  | 4.539116  | -0.243821 |
| H | 2.331757  | -0.103196 | -1.415486 |
| C | 1.456085  | -1.527354 | 1.663435  |
| O | -1.871034 | 0.472672  | -0.568934 |
| C | -2.963118 | -0.019346 | 0.053822  |
| O | -2.908821 | -0.616084 | 1.104558  |
| C | -4.207867 | 0.320299  | -0.734916 |
| C | -5.482945 | -0.450542 | -0.362572 |
| C | -5.313071 | -1.961769 | -0.547580 |
| C | -5.999480 | -0.106182 | 1.037870  |
| H | 3.507725  | -3.134865 | 0.832592  |
| H | 3.778016  | -3.744765 | -0.798535 |
| H | 4.388566  | -1.531666 | -1.627823 |
| H | 5.357507  | -1.857691 | -0.192694 |
| H | 1.901616  | -2.401661 | -1.659640 |
| H | 1.660081  | 1.127116  | 1.278663  |
| H | 0.438536  | 1.225879  | -1.513286 |
| H | -0.750559 | 0.345202  | 1.154006  |
| H | -0.074426 | -1.154987 | -1.422706 |
| H | -0.657072 | -1.887688 | 0.071994  |
| H | 1.475428  | -4.476240 | -0.638034 |
| H | 5.543297  | 0.106493  | 1.140980  |
| H | 4.133928  | 1.292947  | 1.312807  |
| H | -1.933586 | 3.085406  | 0.091879  |
| H | -0.854570 | 4.600878  | 0.262843  |
| H | 2.470243  | -1.491713 | 2.068018  |
| H | 1.015221  | -2.497547 | 1.903497  |
| H | 0.872209  | -0.765751 | 2.186488  |
| H | -4.369655 | 1.399069  | -0.607548 |
| H | -3.970550 | 0.177924  | -1.794551 |
| H | -6.238242 | -0.112413 | -1.084673 |
| H | -4.955096 | -2.200623 | -1.555287 |
| H | -4.600115 | -2.366978 | 0.176320  |
| H | -6.269342 | -2.473978 | -0.402504 |
| H | -5.300510 | -0.444733 | 1.806395  |

|   |           |           |          |
|---|-----------|-----------|----------|
| H | -6.966084 | -0.588946 | 1.214558 |
| H | -6.140865 | 0.974180  | 1.153904 |

ωB97XD energy = -1154.85090765 a.u.

(1R,5S,6R,7R,8S,10R)-3, Conf. N

|   |           |           |           |
|---|-----------|-----------|-----------|
| C | 4.228312  | -1.814863 | -0.607718 |
| C | 4.409294  | -0.444981 | -1.276063 |
| C | 3.626000  | 0.627121  | -0.557811 |
| C | 2.162689  | 0.274066  | -0.416001 |
| C | 1.993237  | -1.070474 | 0.387528  |
| C | 2.751013  | -2.154380 | -0.412028 |
| C | 1.255644  | 1.302084  | 0.226309  |
| C | -0.209812 | 0.870686  | 0.142992  |
| C | -0.418764 | -0.374830 | 0.980865  |
| C | 0.501085  | -1.484220 | 0.457398  |
| O | 1.254706  | 2.604190  | -0.390242 |
| C | 0.059712  | 3.207516  | -0.132668 |
| C | -0.883393 | 2.176694  | 0.423219  |
| O | 2.584819  | -3.392185 | 0.264921  |
| C | 4.189192  | 1.744421  | -0.097562 |
| C | -2.025454 | 2.484640  | 1.030829  |
| O | -0.139645 | 4.372074  | -0.351166 |
| H | 1.775437  | 0.091153  | -1.431038 |
| C | 2.575413  | -0.963965 | 1.809918  |
| O | -1.797399 | -0.797978 | 1.061410  |
| C | -2.496269 | -1.087967 | -0.050142 |
| O | -2.047979 | -1.028696 | -1.174230 |
| C | -3.909370 | -1.506685 | 0.280260  |
| C | -4.941718 | -0.913068 | -0.688091 |
| C | -6.316095 | -1.536815 | -0.439467 |
| C | -4.996001 | 0.612081  | -0.566690 |
| H | 4.730589  | -1.832918 | 0.365333  |
| H | 4.697229  | -2.591976 | -1.224399 |
| H | 4.048538  | -0.506339 | -2.313040 |
| H | 5.469873  | -0.182342 | -1.322658 |
| H | 2.270920  | -2.217634 | -1.403401 |
| H | 1.550370  | 1.454919  | 1.273441  |
| H | -0.410911 | 0.615784  | -0.905683 |
| H | -0.196419 | -0.149328 | 2.027770  |
| H | 0.159490  | -1.762100 | -0.544560 |
| H | 0.407664  | -2.368131 | 1.093770  |
| H | 3.045426  | -4.078904 | -0.224156 |
| H | 5.252973  | 1.921914  | -0.229577 |
| H | 3.617448  | 2.526435  | 0.390183  |
| H | -2.679496 | 1.718245  | 1.433363  |
| H | -2.319161 | 3.525003  | 1.132555  |
| H | 2.668512  | -1.963822 | 2.240555  |
| H | 1.935699  | -0.376342 | 2.473492  |
| H | 3.559423  | -0.489408 | 1.814116  |
| H | -3.929663 | -2.602227 | 0.218673  |
| H | -4.139364 | -1.237591 | 1.316049  |
| H | -4.619378 | -1.165410 | -1.704803 |
| H | -6.667807 | -1.319633 | 0.576398  |
| H | -7.056091 | -1.138329 | -1.140437 |
| H | -6.289382 | -2.624745 | -0.561586 |
| H | -5.727534 | 1.031538  | -1.264104 |

|   |           |          |           |
|---|-----------|----------|-----------|
| H | -4.027182 | 1.070540 | -0.789537 |
| H | -5.291522 | 0.910035 | 0.447269  |

ωB97XD energy = -1154.85081723 a.u.

(1R,5S,6R,7R,8S,10R)-3, Conf. O

|   |           |           |           |
|---|-----------|-----------|-----------|
| C | 4.348826  | -1.630930 | -0.443783 |
| C | 4.525189  | -0.219238 | -1.020027 |
| C | 3.621329  | 0.775107  | -0.332194 |
| C | 2.170688  | 0.347555  | -0.351260 |
| C | 1.995471  | -1.042875 | 0.367469  |
| C | 2.878187  | -2.046603 | -0.408422 |
| C | 1.157713  | 1.299129  | 0.248149  |
| C | -0.273606 | 0.808166  | 0.016730  |
| C | -0.493377 | -0.491341 | 0.764940  |
| C | 0.526289  | -1.525423 | 0.272575  |
| O | 1.145590  | 2.627664  | -0.310093 |
| C | -0.093289 | 3.165030  | -0.123984 |
| C | -1.023836 | 2.068047  | 0.313702  |
| O | 2.712335  | -3.325109 | 0.188501  |
| C | 4.080045  | 1.891093  | 0.234973  |
| C | -2.209387 | 2.296067  | 0.870480  |
| O | -0.331288 | 4.328162  | -0.308501 |
| H | 1.892234  | 0.198792  | -1.406691 |
| C | 2.435854  | -0.988968 | 1.842696  |
| O | -1.846394 | -0.988805 | 0.694321  |
| C | -2.421078 | -1.278945 | -0.489086 |
| O | -1.881595 | -1.135901 | -1.564124 |
| C | -3.829808 | -1.779399 | -0.290558 |
| C | -4.805160 | -0.668189 | 0.147344  |
| C | -4.884046 | 0.452374  | -0.892222 |
| C | -6.186742 | -1.270529 | 0.410833  |
| H | 4.759266  | -1.682039 | 0.570259  |
| H | 4.911411  | -2.350259 | -1.052182 |
| H | 4.274785  | -0.238529 | -2.090613 |
| H | 5.570202  | 0.093726  | -0.942708 |
| H | 2.495880  | -2.078261 | -1.442926 |
| H | 1.350410  | 1.416619  | 1.323386  |
| H | -0.376470 | 0.607097  | -1.057666 |
| H | -0.375936 | -0.314869 | 1.838100  |
| H | 0.296263  | -1.757961 | -0.771440 |
| H | 0.416935  | -2.448947 | 0.846958  |
| H | 3.245690  | -3.964087 | -0.291324 |
| H | 5.141444  | 2.123069  | 0.218874  |
| H | 3.424932  | 2.619164  | 0.700675  |
| H | -2.847261 | 1.481800  | 1.197406  |
| H | -2.556308 | 3.315758  | 1.007262  |
| H | 3.394933  | -0.480570 | 1.965624  |
| H | 2.529283  | -2.006505 | 2.229864  |
| H | 1.713198  | -0.461043 | 2.470227  |
| H | -4.158320 | -2.210282 | -1.240563 |
| H | -3.815184 | -2.568993 | 0.467633  |
| H | -4.430121 | -0.250850 | 1.090912  |
| H | -5.572531 | 1.236323  | -0.561453 |
| H | -3.910696 | 0.917856  | -1.075521 |
| H | -5.249905 | 0.062788  | -1.849140 |
| H | -6.144740 | -2.048770 | 1.179629  |



H -6.595169 -1.718489 -0.502681  
H -6.888983 -0.501407 0.747130  
ωB97XD energy = -1154.85070486 a.u.

3-deoxy-1,2;5,6-di-*O*-isopropylidene-3-*C*-  
methylene- $\alpha$ -D-*ribo*-hexofuranose (4), Conf. A

C -1.191829 -0.755905 -0.862184  
O -0.709663 0.353744 -1.609734  
C 0.165646 1.143387 -0.810906  
C -0.340227 0.953241 0.598172  
C -1.008980 -0.403139 0.632449  
O -2.315784 -0.416657 1.164534  
C -3.239972 -0.334316 0.082868  
O -2.560102 -0.936197 -1.018523  
C -4.448296 -1.182158 0.424524  
C -3.609266 1.114144 -0.228593  
C -0.308187 1.831351 1.594199  
C 1.613303 0.693846 -1.024682  
C 2.678702 1.525654 -0.310513  
O 3.689812 0.575688 -0.043723  
C 3.046045 -0.659535 0.221788  
O 1.803804 -0.608211 -0.488256  
C 2.756051 -0.820065 1.710285  
C 3.908263 -1.774053 -0.339347  
H 0.069006 2.182101 -1.147539  
H 1.795768 0.665488 -2.106772  
H -0.686174 -1.661239 -1.201402  
H -0.406629 -1.135043 1.174838  
H -4.131418 -2.207271 0.625041  
H -4.943947 -0.778006 1.310602  
H -5.155635 -1.179678 -0.408286  
H -4.308726 1.140427 -1.068024  
H -4.080703 1.569304 0.646456  
H -2.726905 1.696193 -0.497425  
H -0.755242 1.598901 2.555873  
H 0.136592 2.815452 1.474458  
H 2.293457 1.965607 0.619517  
H 3.102413 2.313161 -0.935783  
H 2.223385 -1.758724 1.886509  
H 2.132568 0.003836 2.067402  
H 3.692008 -0.832987 2.274815  
H 4.877830 -1.788134 0.164995  
H 3.417022 -2.738687 -0.190040  
H 4.063284 -1.612348 -1.407987

ωB97XD energy = -883.305951357 a.u.

3-deoxy-1,2;5,6-di-*O*-isopropylidene-3-*C*-  
methylene- $\alpha$ -D-*ribo*-hexofuranose (4), Conf. B

C 1.955967 0.370095 -1.302827  
O 0.673528 -0.227599 -1.380356  
C -0.198813 0.235074 -0.343120  
C 0.456456 1.495451 0.170619  
C 1.922277 1.316808 -0.097068  
O 2.538279 0.554701 0.931942  
C 3.190215 -0.592574 0.387251

O 2.974050 -0.532658 -1.020838  
C 4.685315 -0.502925 0.642320  
C 2.565350 -1.850367 0.973293  
C -0.113124 2.578035 0.690213  
C -1.591163 0.397377 -0.952831  
C -2.171366 -0.929427 -1.437682  
O -2.781202 -1.437130 -0.263804  
C -3.301442 -0.330115 0.450970  
O -2.526188 0.802698 0.033990  
C -3.096621 -0.577198 1.934893  
C -4.759428 -0.074771 0.087991  
H -0.251347 -0.521493 0.454072  
H -1.554354 1.158048 -1.738657  
H 2.176999 0.824098 -2.270230  
H 2.459338 2.257922 -0.252089  
H 5.196804 -1.350971 0.179727  
H 5.077438 0.423861 0.217301  
H 4.880100 -0.513710 1.717632  
H 3.056562 -2.736448 0.563369  
H 2.678905 -1.849619 2.060470  
H 1.503277 -1.896234 0.724376  
H 0.493735 3.428962 0.986438  
H -1.185159 2.635344 0.843124  
H -1.416432 -1.640099 -1.774426  
H -2.911314 -0.770610 -2.233756  
H -2.033893 -0.720699 2.142033  
H -3.643513 -1.471161 2.245544  
H -3.459153 0.278595 2.509818  
H -4.864673 0.056230 -0.992021  
H -5.378100 -0.918578 0.404560  
H -5.114712 0.833676 0.581109

ωB97XD energy = -883.305403735 a.u.

3-deoxy-1,2;5,6-di-*O*-isopropylidene-3-*C*-  
methylene- $\alpha$ -D-*ribo*-hexofuranose (4), Conf. C

C -1.890925 -1.415763 0.202576  
O -0.540476 -1.620572 -0.085293  
C 0.211861 -0.433173 0.176805  
C -0.580697 0.297797 1.238165  
C -1.967565 -0.324758 1.283853  
O -3.029254 0.510771 0.880796  
C -3.198569 0.382320 -0.527173  
O -2.616280 -0.874733 -0.874795  
C -4.687060 0.335358 -0.821955  
C -2.497048 1.512165 -1.273257  
C -0.178169 1.305907 2.005585  
C 1.621881 -0.873174 0.576644  
C 2.343939 -1.601148 -0.556077  
O 2.935145 -0.532184 -1.272770  
C 3.318649 0.444434 -0.322345  
O 2.450395 0.255004 0.803600  
C 3.086303 1.817866 -0.926032  
C 4.757259 0.234702 0.136263  
H 0.283494 0.162675 -0.745048  
H 1.567764 -1.463570 1.496347  
H -2.307136 -2.391952 0.457848

|   |           |           |           |
|---|-----------|-----------|-----------|
| H | -2.207850 | -0.707303 | 2.278177  |
| H | -4.852015 | 0.207461  | -1.894648 |
| H | -5.139840 | -0.503022 | -0.288748 |
| H | -5.161499 | 1.264939  | -0.497487 |
| H | -2.962488 | 2.467699  | -1.018440 |
| H | -1.440353 | 1.563459  | -1.005612 |
| H | -2.581415 | 1.350121  | -2.350893 |
| H | -0.854548 | 1.743911  | 2.734268  |
| H | 0.820408  | 1.719579  | 1.918210  |
| H | 1.673650  | -2.141694 | -1.224548 |
| H | 3.105466  | -2.288424 | -0.163528 |
| H | 3.696321  | 1.941223  | -1.824382 |
| H | 3.355325  | 2.593965  | -0.205063 |
| H | 2.033050  | 1.929567  | -1.193568 |
| H | 5.005751  | 0.948239  | 0.926038  |
| H | 4.886920  | -0.775512 | 0.532963  |
| H | 5.443595  | 0.377171  | -0.702502 |

ωB97XD energy = -883.305394979 a.u.

3-deoxy-1,2;5,6-di-*O*-isopropylidene-3-*C*-methylene- $\alpha$ -D-*ribo*-hexofuranose (4), Conf. D

|   |           |           |           |
|---|-----------|-----------|-----------|
| C | -1.218280 | -0.545626 | -1.035245 |
| O | -0.709104 | 0.690983  | -1.512544 |
| C | 0.183493  | 1.267578  | -0.565884 |
| C | -0.275134 | 0.736294  | 0.770759  |
| C | -0.998186 | -0.563890 | 0.494290  |
| O | -2.297297 | -0.660982 | 1.040111  |
| C | -3.233549 | -0.292966 | 0.031927  |
| O | -2.595244 | -0.640675 | -1.196724 |
| C | -4.470090 | -1.154393 | 0.187729  |
| C | -3.549219 | 1.200280  | 0.081032  |
| C | -0.146633 | 1.314902  | 1.958519  |
| C | 1.626942  | 0.884912  | -0.916399 |
| C | 2.705244  | 1.557146  | -0.044690 |
| O | 3.162821  | 0.526216  | 0.802953  |
| C | 2.971111  | -0.698728 | 0.121278  |
| O | 1.810359  | -0.504242 | -0.683155 |
| C | 2.686172  | -1.776588 | 1.147377  |
| C | 4.166414  | -1.024277 | -0.771643 |
| H | 0.079798  | 2.356359  | -0.640960 |
| H | 1.776045  | 1.099966  | -1.981193 |
| H | -0.752471 | -1.361639 | -1.590289 |
| H | -0.420210 | -1.427673 | 0.829592  |
| H | -5.188915 | -0.921976 | -0.601720 |
| H | -4.192786 | -2.208171 | 0.123111  |
| H | -4.936396 | -0.963227 | 1.157421  |
| H | -4.251164 | 1.453187  | -0.717650 |
| H | -3.997931 | 1.449005  | 1.046342  |
| H | -2.645991 | 1.796775  | -0.052998 |
| H | -0.547377 | 0.845651  | 2.851640  |
| H | 0.344566  | 2.275872  | 2.079141  |
| H | 2.314272  | 2.361825  | 0.583312  |
| H | 3.521052  | 1.957611  | -0.660289 |
| H | 1.851619  | -1.462341 | 1.777951  |
| H | 3.565183  | -1.937482 | 1.776205  |
| H | 2.434991  | -2.714347 | 0.645569  |

|   |          |           |           |
|---|----------|-----------|-----------|
| H | 4.325048 | -0.232588 | -1.509673 |
| H | 5.071274 | -1.125546 | -0.166939 |
| H | 3.987388 | -1.959530 | -1.308001 |

ωB97XD energy = -883.305310724 a.u.

3-deoxy-1,2;5,6-di-*O*-isopropylidene-3-*C*-methylene- $\alpha$ -D-*ribo*-hexofuranose (4), Conf. E

|   |           |           |           |
|---|-----------|-----------|-----------|
| C | 1.923510  | -1.072153 | -0.894897 |
| O | 0.576317  | -1.366057 | -0.668159 |
| C | -0.114740 | -0.203483 | -0.208423 |
| C | 0.665300  | 0.959514  | -0.780945 |
| C | 2.012821  | 0.425365  | -1.237831 |
| O | 3.134412  | 0.893638  | -0.523240 |
| C | 3.360246  | 0.031173  | 0.586585  |
| O | 2.724107  | -1.204213 | 0.253583  |
| C | 4.855473  | -0.200259 | 0.709314  |
| C | 2.757204  | 0.605158  | 1.863999  |
| C | 0.266787  | 2.223480  | -0.878879 |
| C | -1.559670 | -0.331916 | -0.665328 |
| C | -2.244201 | -1.609759 | -0.184119 |
| O | -3.593479 | -1.203461 | -0.064066 |
| C | -3.592332 | 0.147252  | 0.363067  |
| O | -2.336719 | 0.691577  | -0.064760 |
| C | -3.668207 | 0.244348  | 1.882442  |
| C | -4.728783 | 0.869035  | -0.337474 |
| H | -0.106560 | -0.178214 | 0.892032  |
| H | -1.608049 | -0.246897 | -1.759381 |
| H | 2.269963  | -1.773778 | -1.655695 |
| H | 2.190181  | 0.623747  | -2.296937 |
| H | 5.061873  | -0.885973 | 1.534873  |
| H | 5.237444  | -0.632397 | -0.217821 |
| H | 5.364674  | 0.748050  | 0.898851  |
| H | 2.873805  | -0.111574 | 2.680992  |
| H | 3.266342  | 1.535644  | 2.127402  |
| H | 1.695739  | 0.821174  | 1.731527  |
| H | 0.920702  | 2.976266  | -1.309731 |
| H | -0.708527 | 2.536382  | -0.520480 |
| H | -1.834439 | -1.941647 | 0.780828  |
| H | -2.188660 | -2.430500 | -0.898365 |
| H | -2.852354 | -0.322414 | 2.338962  |
| H | -4.620510 | -0.157221 | 2.238485  |
| H | -3.579730 | 1.288048  | 2.195108  |
| H | -5.685793 | 0.420071  | -0.059623 |
| H | -4.735282 | 1.924599  | -0.054236 |
| H | -4.598375 | 0.788229  | -1.418714 |

ωB97XD energy = -883.304695831 a.u.

3-deoxy-1,2;5,6-di-*O*-isopropylidene-3-*C*-methylene- $\alpha$ -D-*ribo*-hexofuranose (4), Conf. F

|   |           |           |           |
|---|-----------|-----------|-----------|
| C | 1.970440  | 0.221776  | -1.306214 |
| O | 0.695210  | -0.394171 | -1.229231 |
| C | -0.113115 | 0.174404  | -0.194128 |
| C | 0.553368  | 1.489811  | 0.130189  |
| C | 2.000666  | 1.297954  | -0.213538 |
| O | 2.696170  | 0.661357  | 0.849280  |
| C | 3.330120  | -0.533234 | 0.392805  |

|   |           |           |           |
|---|-----------|-----------|-----------|
| O | 3.020535  | -0.633349 | -0.995402 |
| C | 4.836907  | -0.401524 | 0.535671  |
| C | 2.764862  | -1.722853 | 1.155382  |
| C | -0.014725 | 2.612156  | 0.557300  |
| C | -1.538637 | 0.253804  | -0.719160 |
| C | -2.090633 | -1.094689 | -1.188600 |
| O | -3.463068 | -0.998438 | -0.861685 |
| C | -3.550741 | -0.255279 | 0.338866  |
| O | -2.418230 | 0.623300  | 0.331501  |
| C | -3.463535 | -1.165197 | 1.560974  |
| C | -4.825216 | 0.566055  | 0.305935  |
| H | -0.106963 | -0.485470 | 0.687785  |
| H | -1.589474 | 1.001615  | -1.521472 |
| H | 2.118818  | 0.565734  | -2.331069 |
| H | 2.511190  | 2.220008  | -0.508769 |
| H | 5.331879  | -1.287893 | 0.130787  |
| H | 5.182806  | 0.479760  | -0.009292 |
| H | 5.101882  | -0.295309 | 1.590535  |
| H | 3.255356  | -2.643234 | 0.828542  |
| H | 2.931483  | -1.589168 | 2.227238  |
| H | 1.693180  | -1.815260 | 0.968145  |
| H | 0.579469  | 3.506198  | 0.722111  |
| H | -1.078986 | 2.661503  | 0.764200  |
| H | -1.608165 | -1.929833 | -0.660812 |
| H | -1.995893 | -1.252936 | -2.262166 |
| H | -4.316543 | -1.848513 | 1.582422  |
| H | -3.461659 | -0.564636 | 2.474251  |
| H | -2.541822 | -1.752785 | 1.536949  |
| H | -4.822667 | 1.208167  | -0.577285 |
| H | -5.695545 | -0.094058 | 0.266824  |
| H | -4.891839 | 1.187410  | 1.202490  |

ωB97XD energy = -883.304602007 a.u.

3-deoxy-1,2;5,6-di-*O*-isopropylidene-3-*C*-methylene- $\alpha$ -D-*ribo*-hexofuranose (**4**), Conf. G

|   |           |           |           |
|---|-----------|-----------|-----------|
| C | 1.225170  | -0.781660 | -0.783002 |
| O | 0.102270  | -0.773823 | 0.060947  |
| C | -0.166509 | 0.503810  | 0.630146  |
| C | 0.816638  | 1.461557  | -0.005210 |
| C | 1.704222  | 0.675866  | -0.948371 |
| O | 3.071279  | 0.650413  | -0.600293 |
| C | 3.318500  | -0.521123 | 0.171920  |
| O | 2.330515  | -1.455724 | -0.254988 |
| C | 4.685678  | -1.057599 | -0.203118 |
| C | 3.193274  | -0.241981 | 1.666932  |
| C | 0.914129  | 2.768561  | 0.217676  |
| C | -1.620961 | 0.907930  | 0.377493  |
| C | -2.058357 | 0.851061  | -1.093878 |
| O | -3.383707 | 0.371010  | -1.023032 |
| C | -3.455634 | -0.491016 | 0.101678  |
| O | -2.515230 | 0.036635  | 1.039571  |
| C | -3.066543 | -1.918265 | -0.268902 |
| C | -4.848801 | -0.388336 | 0.691008  |
| H | -0.024112 | 0.438539  | 1.716318  |
| H | -1.755124 | 1.918886  | 0.786057  |
| H | 0.935397  | -1.299991 | -1.699929 |

|   |           |           |           |
|---|-----------|-----------|-----------|
| H | 1.629621  | 1.044450  | -1.974583 |
| H | 4.725440  | -1.238431 | -1.278826 |
| H | 5.456864  | -0.332813 | 0.068941  |
| H | 4.876916  | -1.994256 | 0.326061  |
| H | 2.207401  | 0.152931  | 1.916598  |
| H | 3.345089  | -1.168633 | 2.225769  |
| H | 3.945379  | 0.490133  | 1.971335  |
| H | 1.662920  | 3.365456  | -0.293990 |
| H | 0.273964  | 3.280149  | 0.930905  |
| H | -1.419242 | 0.169884  | -1.672122 |
| H | -2.071631 | 1.829911  | -1.574871 |
| H | -2.050844 | -1.944405 | -0.669473 |
| H | -3.765833 | -2.314420 | -1.010331 |
| H | -3.091682 | -2.550631 | 0.622362  |
| H | -5.587142 | -0.756119 | -0.026077 |
| H | -4.911795 | -0.986268 | 1.603431  |
| H | -5.067439 | 0.654720  | 0.928544  |

ωB97XD energy = -883.303517017 a.u.

3-deoxy-1,2;5,6-di-*O*-isopropylidene-3-*C*-methylene- $\alpha$ -D-*ribo*-hexofuranose (**4**), Conf. H

|   |           |           |           |
|---|-----------|-----------|-----------|
| C | 1.359297  | -0.215722 | -1.096204 |
| O | 0.202381  | -0.507262 | -0.334066 |
| C | -0.122185 | 0.535924  | 0.586486  |
| C | 0.753994  | 1.702633  | 0.183608  |
| C | 1.915622  | 1.106018  | -0.555137 |
| O | 2.930446  | 0.685622  | 0.344073  |
| C | 3.211866  | -0.706007 | 0.168387  |
| O | 2.385313  | -1.132643 | -0.911847 |
| C | 4.661954  | -0.884899 | -0.244395 |
| C | 2.859748  | -1.457918 | 1.444082  |
| C | 0.551017  | 3.001015  | 0.384268  |
| C | -1.617235 | 0.834421  | 0.551483  |
| C | -2.189003 | 1.106342  | -0.848342 |
| O | -3.449241 | 0.471117  | -0.817384 |
| C | -3.330095 | -0.651201 | 0.041461  |
| O | -2.365123 | -0.270107 | 1.024321  |
| C | -2.837541 | -1.879913 | -0.716381 |
| C | -4.666485 | -0.872595 | 0.722478  |
| H | 0.129546  | 0.199822  | 1.601861  |
| H | -1.803498 | 1.681900  | 1.224694  |
| H | 1.093595  | -0.231689 | -2.155823 |
| H | 2.332263  | 1.765050  | -1.323487 |
| H | 4.868893  | -1.940996 | -0.435212 |
| H | 4.859980  | -0.313546 | -1.154052 |
| H | 5.322459  | -0.531914 | 0.551369  |
| H | 1.795671  | -1.350521 | 1.661961  |
| H | 3.081856  | -2.520940 | 1.321272  |
| H | 3.441937  | -1.064310 | 2.281125  |
| H | 1.264816  | 3.734858  | 0.022547  |
| H | -0.312317 | 3.378753  | 0.923434  |
| H | -1.542824 | 0.679468  | -1.626293 |
| H | -2.344327 | 2.167220  | -1.048897 |
| H | -1.863633 | -1.684975 | -1.170048 |
| H | -3.558366 | -2.153188 | -1.491737 |
| H | -2.722991 | -2.717042 | -0.022776 |

|   |           |           |           |
|---|-----------|-----------|-----------|
| H | -5.425035 | -1.136779 | -0.018597 |
| H | -4.583915 | -1.684436 | 1.449243  |
| H | -4.970024 | 0.040856  | 1.237870  |

ωB97XD energy = -883.303403171 a.u.

3-deoxy-1,2;5,6-di-*O*-isopropylidene-3-*C*-methylene- $\alpha$ -D-*ribo*-hexofuranose (**4**), Conf. I

|   |           |           |           |
|---|-----------|-----------|-----------|
| C | 0.926439  | -0.674188 | -0.597053 |
| O | 0.080223  | -0.549231 | 0.529179  |
| C | -0.253949 | 0.804899  | 0.798479  |
| C | 0.797230  | 1.633244  | 0.097561  |
| C | 1.516408  | 0.727764  | -0.878945 |
| O | 2.903157  | 0.583340  | -0.653014 |
| C | 3.127489  | -0.642297 | 0.040956  |
| O | 2.032462  | -1.473959 | -0.336554 |
| C | 4.404695  | -1.263815 | -0.486109 |
| C | 3.160175  | -0.421693 | 1.550923  |
| C | 1.059508  | 2.920477  | 0.299642  |
| C | -1.679683 | 1.153489  | 0.333519  |
| C | -1.975786 | 0.901565  | -1.148517 |
| O | -2.466820 | -0.419860 | -1.159167 |
| C | -3.165885 | -0.622002 | 0.061280  |
| O | -2.632984 | 0.338460  | 0.982355  |
| C | -2.878740 | -2.028073 | 0.550811  |
| C | -4.653137 | -0.340208 | -0.119485 |
| H | -0.224995 | 0.936129  | 1.885853  |
| H | -1.865740 | 2.199613  | 0.604959  |
| H | 0.364812  | -1.135755 | -1.413325 |
| H | 1.381450  | 1.054030  | -1.914363 |
| H | 4.574926  | -2.230393 | -0.005709 |
| H | 4.322511  | -1.407445 | -1.564977 |
| H | 5.252015  | -0.607937 | -0.271877 |
| H | 2.229141  | 0.023082  | 1.905183  |
| H | 3.296723  | -1.379679 | 2.058831  |
| H | 3.988961  | 0.243361  | 1.807117  |
| H | 1.841121  | 3.427425  | -0.257830 |
| H | 0.521996  | 3.500776  | 1.044751  |
| H | -1.103104 | 0.952687  | -1.803650 |
| H | -2.727703 | 1.612239  | -1.519142 |
| H | -3.236506 | -2.757406 | -0.180956 |
| H | -3.389757 | -2.201391 | 1.501458  |
| H | -1.802945 | -2.144008 | 0.690593  |
| H | -4.804700 | 0.666762  | -0.518095 |
| H | -5.089168 | -1.064471 | -0.812558 |
| H | -5.165921 | -0.412582 | 0.842981  |

ωB97XD energy = -883.303265994 a.u.

Methyl 5-deoxy-2,3-*O*-isopropylidene- $\beta$ -D-*erythro*-pent-4-enofuranoside (**5**), Conf. A

|   |           |           |           |
|---|-----------|-----------|-----------|
| C | -1.339882 | -0.732260 | 0.333820  |
| O | -1.286810 | 0.616426  | 0.782478  |
| C | -0.629123 | 1.387533  | -0.144541 |
| C | 0.209325  | 0.498829  | -1.049048 |
| C | -0.118826 | -0.923911 | -0.565480 |
| C | -0.718289 | 2.712405  | -0.166322 |

|   |           |           |           |
|---|-----------|-----------|-----------|
| O | 1.604449  | 0.615407  | -0.871508 |
| C | 2.014999  | -0.294561 | 0.140223  |
| O | 1.022938  | -1.325894 | 0.154209  |
| C | 3.343604  | -0.895908 | -0.279120 |
| C | 2.078985  | 0.379780  | 1.506416  |
| O | -2.464026 | -0.966116 | -0.449025 |
| C | -3.693237 | -0.791520 | 0.234291  |
| H | -1.330448 | -1.358524 | 1.233537  |
| H | -0.006819 | 0.680290  | -2.102320 |
| H | -0.335808 | -1.640790 | -1.359767 |
| H | -0.135872 | 3.274910  | -0.885644 |
| H | -1.340042 | 3.248804  | 0.540628  |
| H | 3.236722  | -1.374397 | -1.254649 |
| H | 4.103902  | -0.113561 | -0.343258 |
| H | 3.663563  | -1.640637 | 0.453637  |
| H | 1.108307  | 0.796494  | 1.781598  |
| H | 2.372524  | -0.353061 | 2.262657  |
| H | 2.816681  | 1.185958  | 1.486722  |
| H | -3.834463 | 0.251914  | 0.532835  |
| H | -3.736811 | -1.433122 | 1.125072  |
| H | -4.479184 | -1.085175 | -0.461707 |

ωB97XD energy = -652.084348640 a.u.

Methyl 5-deoxy-2,3-*O*-isopropylidene- $\beta$ -D-*erythro*-pent-4-enofuranoside (**5**), Conf. B

|   |           |           |           |
|---|-----------|-----------|-----------|
| C | -1.316799 | -0.759426 | 0.343747  |
| O | -1.460440 | 0.560002  | 0.849346  |
| C | -0.873386 | 1.442419  | -0.023916 |
| C | 0.240800  | 0.736430  | -0.758109 |
| C | -0.026994 | -0.759114 | -0.478308 |
| C | -1.247806 | 2.711573  | -0.132444 |
| O | 1.491279  | 0.990578  | -0.137062 |
| C | 2.127728  | -0.255530 | 0.105753  |
| O | 1.063001  | -1.174902 | 0.311960  |
| C | 2.965384  | -0.670623 | -1.102260 |
| C | 2.931658  | -0.150752 | 1.383935  |
| O | -2.356777 | -1.092410 | -0.517456 |
| C | -3.631185 | -1.110000 | 0.101825  |
| H | -1.278438 | -1.425572 | 1.213279  |
| H | 0.273793  | 0.995467  | -1.820274 |
| H | -0.140519 | -1.373051 | -1.376009 |
| H | -0.711298 | 3.373028  | -0.801442 |
| H | -2.060893 | 3.111490  | 0.461501  |
| H | 2.344391  | -0.736032 | -2.000809 |
| H | 3.751765  | 0.067035  | -1.280444 |
| H | 3.422701  | -1.647521 | -0.926034 |
| H | 2.270601  | 0.142189  | 2.201486  |
| H | 3.393266  | -1.113598 | 1.615576  |
| H | 3.716557  | 0.600537  | 1.268877  |
| H | -3.905116 | -0.116242 | 0.469621  |
| H | -3.646346 | -1.822957 | 0.937619  |
| H | -4.343374 | -1.430772 | -0.658587 |

ωB97XD energy = -652.083100275 a.u.

Methyl 5-deoxy-2,3-*O*-isopropylidene- $\beta$ -D-*erythro*-pent-4-enofuranoside (**5**), Conf. C

|   |           |           |           |
|---|-----------|-----------|-----------|
| C | -1.249751 | -0.770852 | 0.747729  |
| O | -1.299095 | 0.632806  | 0.989108  |
| C | -0.757161 | 1.344393  | -0.048393 |
| C | 0.014221  | 0.420337  | -0.976036 |
| C | -0.192578 | -0.971001 | -0.356219 |
| C | -0.898224 | 2.661119  | -0.162649 |
| O | 1.411994  | 0.607561  | -0.978043 |
| C | 1.981404  | -0.224687 | 0.024144  |
| O | 1.068807  | -1.315971 | 0.170200  |
| C | 3.300625  | -0.761439 | -0.496669 |
| C | 2.129357  | 0.515824  | 1.349741  |
| O | -2.506464 | -1.281114 | 0.441202  |
| C | -3.167969 | -0.686530 | -0.662047 |
| H | -0.948601 | -1.260599 | 1.673891  |
| H | -0.332661 | 0.514268  | -2.007150 |
| H | -0.507352 | -1.746667 | -1.058542 |
| H | -0.420752 | 3.176428  | -0.986917 |
| H | -1.457839 | 3.235814  | 0.565650  |
| H | 3.138153  | -1.273539 | -1.446983 |
| H | 4.006965  | 0.058910  | -0.645742 |
| H | 3.723801  | -1.465653 | 0.223758  |
| H | 2.544754  | -0.161106 | 2.100976  |
| H | 2.803067  | 1.367352  | 1.225268  |
| H | 1.165087  | 0.882944  | 1.707161  |
| H | -4.120334 | -1.206761 | -0.763353 |
| H | -2.602413 | -0.808845 | -1.596758 |
| H | -3.353355 | 0.378208  | -0.488594 |

ωB97XD energy = -652.080400985 a.u.

#### Bicyclomycin (6), Conf. A

|   |           |           |           |
|---|-----------|-----------|-----------|
| N | -1.972387 | 1.334565  | -0.390008 |
| C | -2.455493 | 0.294171  | 0.515141  |
| C | -1.301207 | -0.120368 | 1.450295  |
| N | -0.070487 | -0.129909 | 0.910717  |
| C | 0.255325  | 0.322759  | -0.429047 |
| C | -0.719691 | 1.444762  | -0.864075 |
| O | -0.359227 | 2.336850  | -1.623706 |
| O | -1.562717 | -0.414515 | 2.607620  |
| C | -2.970793 | -0.916084 | -0.276210 |
| O | -3.450242 | 0.874886  | 1.290974  |
| C | -1.966207 | -1.818576 | -0.957884 |
| C | -4.281505 | -1.146915 | -0.335733 |
| C | -0.986745 | -1.166756 | -1.945688 |
| O | 0.241088  | -0.714082 | -1.383405 |
| C | 1.699234  | 0.887345  | -0.473356 |
| C | 2.819286  | 0.009601  | 0.142271  |
| C | 2.776152  | -1.468402 | -0.272417 |
| O | 3.849231  | -2.189308 | 0.293318  |
| C | 4.172579  | 0.627622  | -0.213391 |
| O | 2.656621  | -0.019839 | 1.570245  |
| O | 1.757330  | 2.111877  | 0.228520  |
| H | 1.915032  | 1.032559  | -1.536667 |
| H | -2.656073 | 2.013099  | -0.702219 |
| H | 0.714356  | -0.337726 | 1.527459  |
| H | -3.306827 | 0.547431  | 2.195095  |

|   |           |           |           |
|---|-----------|-----------|-----------|
| H | -2.533178 | -2.570682 | -1.514666 |
| H | -1.377327 | -2.367237 | -0.212096 |
| H | -4.674770 | -1.981789 | -0.908065 |
| H | -4.985200 | -0.514393 | 0.192814  |
| H | -1.472575 | -0.357286 | -2.506146 |
| H | -0.661679 | -1.918253 | -2.666985 |
| H | 2.868987  | -1.553816 | -1.357024 |
| H | 1.817964  | -1.912956 | 0.016109  |
| H | 3.797371  | -2.081013 | 1.249272  |
| H | 4.972305  | 0.057079  | 0.260560  |
| H | 4.218681  | 1.668362  | 0.115950  |
| H | 4.329803  | 0.601532  | -1.296128 |
| H | 2.730886  | 0.886259  | 1.894039  |
| H | 1.300083  | 2.774336  | -0.304225 |

ωB97XD energy = -1103.92528994 a.u.

#### Bicyclomycin (6), Conf. B

|   |           |           |           |
|---|-----------|-----------|-----------|
| N | -1.523468 | -0.811071 | -1.243330 |
| C | -2.535133 | 0.010030  | -0.585353 |
| C | -1.937159 | 1.403991  | -0.328025 |
| N | -0.620309 | 1.443164  | -0.061853 |
| C | 0.286077  | 0.313637  | -0.037049 |
| C | -0.191807 | -0.731397 | -1.074804 |
| O | 0.581548  | -1.466412 | -1.676803 |
| O | -2.671683 | 2.378561  | -0.380979 |
| C | -2.984141 | -0.637777 | 0.730756  |
| O | -3.582259 | 0.147326  | -1.487500 |
| C | -2.036587 | -0.605816 | 1.908751  |
| C | -4.188313 | -1.201740 | 0.806835  |
| C | -0.634752 | -1.195449 | 1.699403  |
| O | 0.357248  | -0.269694 | 1.254825  |
| C | 1.718488  | 0.879937  | -0.376136 |
| C | 2.950809  | 0.157475  | 0.259289  |
| C | 3.014463  | -1.375091 | 0.106018  |
| O | 3.257508  | -1.796971 | -1.210149 |
| C | 4.225590  | 0.762161  | -0.323706 |
| O | 2.953685  | 0.485872  | 1.652102  |
| O | 1.773470  | 2.231179  | 0.042728  |
| H | 1.811628  | 0.871990  | -1.465531 |
| H | -1.865274 | -1.523039 | -1.877468 |
| H | -0.179248 | 2.344176  | 0.103632  |
| H | -3.880302 | 1.069352  | -1.412668 |
| H | -2.506381 | -1.169860 | 2.720022  |
| H | -1.918111 | 0.420623  | 2.278170  |
| H | -4.518899 | -1.688993 | 1.719197  |
| H | -4.871124 | -1.180462 | -0.034670 |
| H | -0.664241 | -2.068282 | 1.034677  |
| H | -0.243805 | -1.529016 | 2.662371  |
| H | 2.108417  | -1.839008 | 0.516249  |
| H | 3.861188  | -1.700496 | 0.718629  |
| H | 2.401867  | -1.789617 | -1.661535 |
| H | 4.313016  | 0.505180  | -1.380925 |
| H | 5.086884  | 0.344745  | 0.203846  |
| H | 4.239780  | 1.847883  | -0.212215 |
| H | 2.160963  | 0.085745  | 2.034646  |
| H | 2.188739  | 2.215787  | 0.920173  |

ωB97XD energy = -1103.92482136 a.u.

Bicyclomycin (6), Conf. C

|   |           |           |           |
|---|-----------|-----------|-----------|
| N | 1.837877  | -0.360192 | 1.419926  |
| C | 2.415984  | 0.450473  | 0.351486  |
| C | 1.332254  | 1.411699  | -0.179027 |
| N | 0.072482  | 0.945655  | -0.205664 |
| C | -0.341577 | -0.349086 | 0.298725  |
| C | 0.550005  | -0.734709 | 1.513966  |
| O | 0.097672  | -1.360365 | 2.464519  |
| O | 1.676416  | 2.528583  | -0.539167 |
| C | 2.954125  | -0.438876 | -0.777059 |
| O | 3.417685  | 1.216924  | 0.934623  |
| C | 1.964469  | -1.137189 | -1.682458 |
| C | 4.270103  | -0.564189 | -0.941800 |
| C | 0.903501  | -2.022699 | -1.014107 |
| O | -0.314623 | -1.363850 | -0.679776 |
| C | -1.804107 | -0.314712 | 0.800264  |
| C | -2.956119 | -0.196735 | -0.263758 |
| C | -2.629392 | 0.627616  | -1.514864 |
| O | -2.302729 | 1.972826  | -1.206526 |
| C | -3.405876 | -1.591310 | -0.695505 |
| O | -4.056925 | 0.448957  | 0.367328  |
| O | -1.941343 | 0.737539  | 1.742586  |
| H | -1.945624 | -1.272138 | 1.307861  |
| H | 2.462127  | -0.626906 | 2.171072  |
| H | -0.657721 | 1.593456  | -0.523646 |
| H | 3.331892  | 2.102337  | 0.541043  |
| H | 2.539588  | -1.774283 | -2.361130 |
| H | 1.442993  | -0.405917 | -2.312935 |
| H | 4.675271  | -1.206489 | -1.718146 |
| H | 4.966549  | -0.022277 | -0.312743 |
| H | 1.314106  | -2.538377 | -0.136776 |
| H | 0.580820  | -2.784935 | -1.725444 |
| H | -3.504331 | 0.595600  | -2.175252 |
| H | -1.775391 | 0.205552  | -2.049079 |
| H | -3.012563 | 2.318021  | -0.651475 |
| H | -2.591292 | -2.125727 | -1.189706 |
| H | -4.255569 | -1.510190 | -1.378805 |
| H | -3.728889 | -2.164605 | 0.177343  |
| H | -3.733001 | 0.813337  | 1.204040  |
| H | -1.610910 | 0.418678  | 2.590071  |

ωB97XD energy = -1103.92382803 a.u.

Bicyclomycin (6), Conf. D

|   |           |           |           |
|---|-----------|-----------|-----------|
| N | 1.527854  | -0.433839 | 1.424304  |
| C | 2.526371  | 0.190801  | 0.563331  |
| C | 1.924926  | 1.476482  | -0.021885 |
| N | 0.604613  | 1.448978  | -0.262598 |
| C | -0.304565 | 0.340560  | -0.012506 |
| C | 0.200294  | -0.454896 | 1.215391  |
| O | -0.559217 | -1.109787 | 1.922248  |
| O | 2.661045  | 2.428502  | -0.235940 |
| C | 2.937580  | -0.766403 | -0.565705 |
| O | 3.596105  | 0.537420  | 1.378253  |
| C | 1.977094  | -0.985143 | -1.714478 |

|   |           |           |           |
|---|-----------|-----------|-----------|
| C | 4.124794  | -1.368094 | -0.511111 |
| C | 0.569319  | -1.503572 | -1.379540 |
| O | -0.415383 | -0.503743 | -1.135248 |
| C | -1.711755 | 1.004610  | 0.212571  |
| C | -3.035233 | 0.182633  | 0.015244  |
| C | -3.209919 | -1.149708 | 0.761101  |
| O | -2.447596 | -2.211116 | 0.235146  |
| C | -4.192316 | 1.088406  | 0.449191  |
| O | -3.187256 | -0.040465 | -1.381732 |
| O | -1.797441 | 2.092516  | -0.692536 |
| H | -1.697271 | 1.426515  | 1.222761  |
| H | 1.881392  | -1.026666 | 2.165865  |
| H | 0.171935  | 2.257986  | -0.698647 |
| H | 3.900940  | 1.404231  | 1.061841  |
| H | 2.436148  | -1.718544 | -2.384093 |
| H | 1.866455  | -0.062933 | -2.298452 |
| H | 4.430431  | -2.069090 | -1.282020 |
| H | 4.819684  | -1.165979 | 0.295789  |
| H | 0.601457  | -2.221093 | -0.548411 |
| H | 0.172015  | -2.031048 | -2.247830 |
| H | -4.260043 | -1.430454 | 0.636072  |
| H | -3.011849 | -1.005160 | 1.828080  |
| H | -1.624975 | -2.217108 | 0.739490  |
| H | -4.185748 | 1.221601  | 1.535839  |
| H | -5.137719 | 0.624948  | 0.158603  |
| H | -4.127603 | 2.071112  | -0.019124 |
| H | -2.589893 | -0.770389 | -1.599342 |
| H | -2.214236 | 1.725436  | -1.489512 |

ωB97XD energy = -1103.92226264 a.u.

1α,4β-dihydroxy-8α-acetoxy-guaia-2,10(14),11(13)-triene-6,12-olide (7), Conf. A

|   |           |           |           |
|---|-----------|-----------|-----------|
| C | 2.834988  | -2.136818 | -0.344495 |
| C | 3.721085  | -1.233258 | 0.061149  |
| C | 3.141289  | 0.156897  | 0.169333  |
| C | 1.736712  | -0.009015 | -0.495388 |
| C | 1.473437  | -1.547485 | -0.622594 |
| C | 0.629423  | 0.728105  | 0.225221  |
| C | -0.760320 | 0.655779  | -0.450464 |
| C | -1.604190 | -0.465862 | 0.154141  |
| C | -1.047161 | -1.871679 | -0.113874 |
| C | 0.388294  | -2.058521 | 0.324146  |
| C | 0.685165  | -2.594999 | 1.508431  |
| O | 0.978185  | 2.127502  | 0.294162  |
| C | -0.107422 | 2.919651  | 0.125164  |
| C | -1.268898 | 2.063554  | -0.261973 |
| C | 4.000103  | 1.207990  | -0.533850 |
| O | 3.053481  | 0.451864  | 1.560612  |
| C | -2.479721 | 2.593918  | -0.419526 |
| O | 1.027635  | -1.885534 | -1.939242 |
| H | 1.790526  | 0.390021  | -1.515413 |
| O | -0.061105 | 4.113532  | 0.263443  |
| O | -2.909126 | -0.380690 | -0.448808 |
| O | -3.846429 | -1.322121 | 1.373006  |
| C | -3.952955 | -0.844855 | 0.267497  |

|   |           |           |           |
|---|-----------|-----------|-----------|
| C | -5.241636 | -0.676364 | -0.489362 |
| H | 3.011856  | -3.199841 | -0.473019 |
| H | 4.753967  | -1.431182 | 0.329494  |
| H | 0.568266  | 0.373599  | 1.259122  |
| H | -0.634237 | 0.457327  | -1.523158 |
| H | -1.715843 | -0.305556 | 1.231438  |
| H | -1.680961 | -2.580822 | 0.423802  |
| H | -1.140225 | -2.071727 | -1.184428 |
| H | -0.102523 | -2.927080 | 2.178719  |
| H | 1.708395  | -2.701434 | 1.853343  |
| H | 3.514434  | 2.187925  | -0.487796 |
| H | 4.978126  | 1.274215  | -0.048408 |
| H | 4.149702  | 0.950345  | -1.586860 |
| H | 2.822869  | 1.383886  | 1.656014  |
| H | -2.618642 | 3.656171  | -0.241628 |
| H | -3.329242 | 1.997153  | -0.727046 |
| H | 1.754702  | -1.729443 | -2.550057 |
| H | -5.438695 | 0.387031  | -0.652663 |
| H | -6.057624 | -1.116537 | 0.081516  |
| H | -5.165128 | -1.152717 | -1.469695 |

ωB97XD energy = -1110.90058117 a.u.

#### Mexicanin (8), Conf. A

|   |           |           |           |
|---|-----------|-----------|-----------|
| C | -1.338298 | -0.585197 | 0.251378  |
| C | -1.636991 | 0.769925  | -0.452003 |
| C | -3.123375 | 0.684149  | -0.725512 |
| C | -3.616497 | -0.554800 | -0.597371 |
| C | -2.538570 | -1.453990 | -0.149136 |
| C | -0.024233 | -1.262485 | -0.222016 |
| C | 1.119791  | -0.265145 | -0.463838 |
| C | 1.254967  | 0.930692  | 0.500892  |
| C | 0.425974  | 2.155140  | 0.133320  |
| C | -1.107130 | 2.037694  | 0.249310  |
| C | 2.522129  | -0.808056 | -0.490821 |
| C | 3.414033  | 0.300498  | -0.042031 |
| O | 2.642855  | 1.315486  | 0.423257  |
| O | -2.557628 | -2.669859 | -0.075633 |
| C | -1.732115 | 3.314587  | -0.324059 |
| H | -1.171493 | 0.754862  | -1.451538 |
| O | 4.615080  | 0.363488  | -0.068675 |
| C | 2.994728  | -2.001534 | -0.835446 |
| C | -1.450450 | -0.493091 | 1.791372  |
| O | 0.385853  | -2.268215 | 0.676767  |
| H | -3.698678 | 1.537476  | -1.069182 |
| H | -4.623903 | -0.887721 | -0.813036 |
| H | -0.233071 | -1.724798 | -1.199734 |
| H | 0.941728  | 0.171312  | -1.457314 |
| H | 1.079983  | 0.622157  | 1.535227  |
| H | 0.760866  | 2.987972  | 0.760235  |
| H | 0.682432  | 2.422341  | -0.901782 |
| H | -1.374021 | 1.988055  | 1.310631  |
| H | -1.602887 | 3.363165  | -1.412058 |
| H | -2.800375 | 3.386385  | -0.102774 |
| H | -1.252086 | 4.198982  | 0.104829  |
| H | 4.065160  | -2.180630 | -0.802911 |

|   |           |           |           |
|---|-----------|-----------|-----------|
| H | 2.339543  | -2.813516 | -1.128970 |
| H | -1.469239 | -1.492675 | 2.227006  |
| H | -0.619231 | 0.042582  | 2.247473  |
| H | -2.378852 | 0.015084  | 2.069286  |
| H | -0.318937 | -2.928554 | 0.694651  |

ωB97XD energy = -883.096903969 a.u.

#### Neuroleulin A (9), Conf. A

|   |           |           |           |
|---|-----------|-----------|-----------|
| C | 3.384325  | 0.372899  | -1.232204 |
| C | 3.318683  | -0.953264 | -1.398106 |
| C | 3.014370  | -1.974942 | -0.338260 |
| C | 1.569823  | -2.490069 | -0.486321 |
| C | 2.159485  | 2.207317  | 0.125846  |
| C | 3.157765  | 1.039072  | 0.073906  |
| C | 0.472839  | -1.425229 | -0.586340 |
| C | 0.354055  | -0.478412 | 0.633606  |
| C | -0.113441 | 0.952178  | 0.307350  |
| C | 0.812388  | 1.839492  | -0.525903 |
| O | 3.713848  | 0.696219  | 1.105439  |
| C | 4.005831  | -3.141896 | -0.414154 |
| C | 2.786607  | 3.404290  | -0.611653 |
| O | 1.943708  | 2.548051  | 1.474007  |
| H | 0.267465  | 2.774811  | -0.687762 |
| O | -0.783108 | -2.134785 | -0.654406 |
| C | -1.417724 | -2.122223 | 0.538572  |
| C | -0.692009 | -1.190953 | 1.450594  |
| C | -0.999168 | -1.055074 | 2.737033  |
| O | -2.406857 | -2.773667 | 0.757700  |
| O | -1.345384 | 0.805162  | -0.421878 |
| C | -2.305294 | 1.739285  | -0.239692 |
| C | -3.546697 | 1.402744  | -1.024707 |
| O | -2.155741 | 2.709851  | 0.466016  |
| C | -4.121269 | 0.010598  | -0.705869 |
| C | -4.439516 | -0.129355 | 0.783942  |
| C | -5.362743 | -0.247178 | -1.561091 |
| H | 3.501768  | 1.017793  | -2.099147 |
| H | 3.422641  | -1.343662 | -2.411870 |
| H | 3.125317  | -1.509878 | 0.643085  |
| H | 1.489364  | -3.123563 | -1.378046 |
| H | 1.347435  | -3.134472 | 0.373518  |
| H | 0.553347  | -0.870674 | -1.523489 |
| H | 1.296789  | -0.406272 | 1.180970  |
| H | -0.320321 | 1.463923  | 1.249918  |
| H | 0.983429  | 1.391652  | -1.510606 |
| H | 3.773733  | -3.890191 | 0.349472  |
| H | 5.029371  | -2.793946 | -0.250898 |
| H | 3.961072  | -3.634317 | -1.392220 |
| H | 2.868490  | 3.230444  | -1.688774 |
| H | 3.779184  | 3.624447  | -0.208502 |
| H | 2.148421  | 4.275743  | -0.447559 |
| H | 2.639043  | 2.107192  | 1.986598  |
| H | -0.460667 | -0.367586 | 3.382288  |
| H | -1.812242 | -1.635482 | 3.162783  |
| H | -4.282273 | 2.182612  | -0.807346 |
| H | -3.296197 | 1.460900  | -2.090950 |

|   |           |           |           |
|---|-----------|-----------|-----------|
| H | -3.364289 | -0.735384 | -0.969862 |
| H | -3.548171 | 0.014016  | 1.403708  |
| H | -5.188173 | 0.610381  | 1.092143  |
| H | -4.826177 | -1.128731 | 0.999953  |
| H | -5.137983 | -0.166409 | -2.630024 |
| H | -6.154668 | 0.474718  | -1.327185 |
| H | -5.757312 | -1.250409 | -1.374505 |

ωB97XD energy = -1230.05669807 a.u.

Neuroleulin A (9), Conf. B

|   |           |           |           |
|---|-----------|-----------|-----------|
| C | 3.492652  | 0.664328  | -1.096385 |
| C | 3.592234  | -0.658631 | -1.271738 |
| C | 3.329441  | -1.722369 | -0.242672 |
| C | 1.964632  | -2.388566 | -0.501904 |
| C | 1.979101  | 2.340474  | 0.172330  |
| C | 3.097605  | 1.285718  | 0.191100  |
| C | 0.773731  | -1.441309 | -0.672307 |
| C | 0.452002  | -0.552012 | 0.554967  |
| C | -0.139710 | 0.830660  | 0.221841  |
| C | 0.721560  | 1.825233  | -0.555818 |
| O | 3.606253  | 0.989721  | 1.261098  |
| C | 4.447938  | -2.770355 | -0.251917 |
| C | 2.510693  | 3.598298  | -0.537558 |
| O | 1.647094  | 2.659779  | 1.501762  |
| H | 0.080968  | 2.692866  | -0.743924 |
| O | -0.391478 | -2.269396 | -0.873141 |
| C | -1.147079 | -2.337744 | 0.243929  |
| C | -0.589642 | -1.388779 | 1.251978  |
| C | -1.020060 | -1.336955 | 2.508631  |
| O | -2.104627 | -3.062258 | 0.339935  |
| O | -1.314518 | 0.560526  | -0.565676 |
| C | -2.405569 | 1.327925  | -0.360239 |
| C | -3.593367 | 0.826239  | -1.140227 |
| O | -2.410619 | 2.288236  | 0.375482  |
| C | -4.808636 | 0.580284  | -0.228181 |
| C | -6.016659 | 0.172611  | -1.073159 |
| C | -4.498073 | -0.474662 | 0.836845  |
| H | 3.595707  | 1.328476  | -1.950486 |
| H | 3.809853  | -1.021193 | -2.277795 |
| H | 3.315486  | -1.261124 | 0.746519  |
| H | 2.017103  | -3.008573 | -1.405197 |
| H | 1.750147  | -3.069480 | 0.331281  |
| H | 0.878033  | -0.850615 | -1.584703 |
| H | 1.330549  | -0.402712 | 1.187169  |
| H | -0.445894 | 1.303963  | 1.157540  |
| H | 0.996910  | 1.412634  | -1.532191 |
| H | 4.528368  | -3.254618 | -1.231857 |
| H | 4.249472  | -3.547670 | 0.492010  |
| H | 5.411969  | -2.311352 | -0.016682 |
| H | 1.769868  | 4.392411  | -0.417898 |
| H | 2.672532  | 3.432373  | -1.606782 |
| H | 3.447179  | 3.930660  | -0.080809 |
| H | 2.339270  | 2.274530  | 2.061488  |
| H | -0.607826 | -0.633526 | 3.225804  |
| H | -1.811074 | -2.005429 | 2.835318  |
| H | -3.841706 | 1.592201  | -1.883899 |

|   |           |           |           |
|---|-----------|-----------|-----------|
| H | -3.320845 | -0.090738 | -1.671289 |
| H | -5.034716 | 1.528079  | 0.274781  |
| H | -6.253792 | 0.930418  | -1.827462 |
| H | -5.827350 | -0.775193 | -1.590686 |
| H | -6.901311 | 0.036304  | -0.443343 |
| H | -3.679270 | -0.157332 | 1.491523  |
| H | -4.209135 | -1.427768 | 0.380251  |
| H | -5.374116 | -0.652775 | 1.468535  |

ωB97XD energy = -1230.05571350 a.u.

Neuroleulin A (9), Conf. C

|   |           |           |           |
|---|-----------|-----------|-----------|
| C | 2.999929  | 0.776700  | -1.456093 |
| C | 3.087618  | -0.530827 | -1.727949 |
| C | 3.098232  | -1.657814 | -0.733093 |
| C | 1.723390  | -2.353943 | -0.701704 |
| C | 1.796512  | 2.336052  | 0.228555  |
| C | 2.909431  | 1.319944  | -0.078518 |
| C | 0.515222  | -1.433823 | -0.511753 |
| C | 0.495370  | -0.633318 | 0.814071  |
| C | -0.198798 | 0.739080  | 0.721678  |
| C | 0.410830  | 1.804982  | -0.188662 |
| O | 3.666600  | 0.989905  | 0.820868  |
| C | 4.201917  | -2.666844 | -1.069717 |
| C | 2.102269  | 3.638636  | -0.531978 |
| O | 1.797002  | 2.590858  | 1.611967  |
| H | -0.281747 | 2.652892  | -0.161793 |
| O | -0.659680 | -2.272451 | -0.481476 |
| C | -1.136345 | -2.410945 | 0.775334  |
| C | -0.328649 | -1.545203 | 1.684555  |
| C | -0.404876 | -1.616001 | 3.009767  |
| O | -2.066842 | -3.126504 | 1.044870  |
| O | -1.516265 | 0.451643  | 0.223201  |
| C | -2.567731 | 1.121077  | 0.741068  |
| C | -3.870591 | 0.562135  | 0.226920  |
| O | -2.450958 | 2.024902  | 1.535132  |
| C | -3.879704 | 0.184497  | -1.262350 |
| C | -3.576133 | 1.398795  | -2.143245 |
| C | -5.227970 | -0.438507 | -1.628700 |
| H | 2.885662  | 1.487500  | -2.270325 |
| H | 3.072411  | -0.829899 | -2.777498 |
| H | 3.311162  | -1.251573 | 0.257610  |
| H | 1.566324  | -2.910458 | -1.633617 |
| H | 1.729857  | -3.093771 | 0.108246  |
| H | 0.390265  | -0.780996 | -1.378255 |
| H | 1.498717  | -0.489521 | 1.220595  |
| H | -0.283209 | 1.153121  | 1.729120  |
| H | 0.442063  | 1.450075  | -1.224535 |
| H | 5.185345  | -2.189763 | -1.045798 |
| H | 4.052756  | -3.099145 | -2.065778 |
| H | 4.203044  | -3.486022 | -0.344588 |
| H | 1.977964  | 3.523339  | -1.612782 |
| H | 3.120226  | 3.979010  | -0.322075 |
| H | 1.405637  | 4.404417  | -0.182876 |
| H | 2.609873  | 2.198547  | 1.967108  |
| H | 0.194235  | -0.975969 | 3.650286  |
| H | -1.084420 | -2.323432 | 3.475308  |



|   |           |           |           |
|---|-----------|-----------|-----------|
| H | -4.647246 | 1.299282  | 0.452079  |
| H | -4.080674 | -0.331454 | 0.829239  |
| H | -3.098379 | -0.567159 | -1.420559 |
| H | -2.594744 | 1.829034  | -1.916443 |
| H | -4.329908 | 2.182158  | -1.998218 |
| H | -3.580977 | 1.122592  | -3.202577 |
| H | -6.045426 | 0.274175  | -1.464683 |
| H | -5.247164 | -0.730128 | -2.683589 |
| H | -5.430027 | -1.331720 | -1.029211 |

ωB97XD energy = -1230.05511611 a.u.

#### Neuroleulin A (9), Conf. D

|   |           |           |           |
|---|-----------|-----------|-----------|
| C | 2.991280  | 0.842589  | -1.446914 |
| C | 3.106411  | -0.459333 | -1.735354 |
| C | 3.139305  | -1.599069 | -0.755484 |
| C | 1.779600  | -2.324798 | -0.735653 |
| C | 1.752274  | 2.354524  | 0.254881  |
| C | 2.886074  | 1.365080  | -0.062460 |
| C | 0.551148  | -1.434043 | -0.535927 |
| C | 0.512628  | -0.650378 | 0.799525  |
| C | -0.209105 | 0.708868  | 0.724403  |
| C | 0.378579  | 1.799194  | -0.170911 |
| O | 3.645621  | 1.036192  | 0.835419  |
| C | 4.264479  | -2.579720 | -1.104631 |
| C | 2.031109  | 3.671860  | -0.490183 |
| O | 1.746290  | 2.594182  | 1.640920  |
| H | -0.331948 | 2.631774  | -0.133572 |
| O | -0.604404 | -2.299177 | -0.516830 |
| C | -1.079209 | -2.463416 | 0.737555  |
| C | -0.293607 | -1.589208 | 1.658038  |
| C | -0.373378 | -1.674170 | 2.982212  |
| O | -1.992940 | -3.203803 | 0.997296  |
| O | -1.521766 | 0.403836  | 0.223219  |
| C | -2.586353 | 1.029470  | 0.769462  |
| C | -3.876609 | 0.455959  | 0.241116  |
| O | -2.486790 | 1.910138  | 1.591330  |
| C | -3.906288 | 0.216034  | -1.276622 |
| C | -5.240799 | -0.418745 | -1.672494 |
| C | -3.663151 | 1.516111  | -2.047107 |
| H | 2.863618  | 1.561322  | -2.252123 |
| H | 3.099153  | -0.744938 | -2.788729 |
| H | 3.343054  | -1.201963 | 0.240802  |
| H | 1.635844  | -2.873041 | -1.674579 |
| H | 1.800953  | -3.074347 | 0.065075  |
| H | 0.411879  | -0.773505 | -1.394379 |
| H | 1.512109  | -0.490969 | 1.209694  |
| H | -0.300545 | 1.107401  | 1.737390  |
| H | 0.418140  | 1.459720  | -1.211605 |
| H | 4.125096  | -3.001771 | -2.106479 |
| H | 4.282456  | -3.408451 | -0.390561 |
| H | 5.237691  | -2.082538 | -1.073217 |
| H | 1.317845  | 4.418798  | -0.133863 |
| H | 1.910939  | 3.566017  | -1.572434 |
| H | 3.041189  | 4.031715  | -0.274833 |
| H | 2.563635  | 2.209039  | 1.993711  |
| H | 0.209195  | -1.027283 | 3.631038  |

|   |           |           |           |
|---|-----------|-----------|-----------|
| H | -1.039312 | -2.400410 | 3.438358  |
| H | -4.030005 | -0.497517 | 0.762758  |
| H | -4.678279 | 1.134833  | 0.546613  |
| H | -3.104305 | -0.489934 | -1.519298 |
| H | -5.397085 | -1.370526 | -1.155038 |
| H | -6.078147 | 0.244868  | -1.424768 |
| H | -5.275497 | -0.611868 | -2.749347 |
| H | -2.686392 | 1.951112  | -1.809216 |
| H | -4.430966 | 2.260877  | -1.805940 |
| H | -3.694736 | 1.339781  | -3.126991 |

ωB97XD energy = -1230.05508425 a.u.

#### Neuroleulin A (9), Conf. E

|   |           |           |           |
|---|-----------|-----------|-----------|
| C | 3.361697  | 1.023362  | -1.208270 |
| C | 3.629777  | -0.270274 | -1.423162 |
| C | 3.566952  | -1.380690 | -0.412120 |
| C | 2.287429  | -2.215448 | -0.614751 |
| C | 1.716540  | 2.468668  | 0.175536  |
| C | 2.959930  | 1.565999  | 0.112611  |
| C | 0.975137  | -1.429222 | -0.672513 |
| C | 0.632292  | -0.618233 | 0.601679  |
| C | -0.163210 | 0.679307  | 0.353141  |
| C | 0.490273  | 1.790238  | -0.467285 |
| O | 3.558187  | 1.318742  | 1.148062  |
| C | 4.808774  | -2.273819 | -0.510099 |
| C | 2.029211  | 3.782919  | -0.561443 |
| O | 1.436838  | 2.749307  | 1.525252  |
| H | -0.277257 | 2.561863  | -0.590748 |
| O | -0.087660 | -2.395162 | -0.821611 |
| C | -0.757491 | -2.574999 | 0.336588  |
| C | -0.239632 | -1.599854 | 1.340507  |
| C | -0.577494 | -1.638079 | 2.625529  |
| O | -1.630262 | -3.395788 | 0.465418  |
| O | -1.354106 | 0.287289  | -0.353574 |
| C | -2.555556 | 0.553214  | 0.211309  |
| C | -3.654112 | -0.173699 | -0.521047 |
| O | -2.691331 | 1.246561  | 1.191352  |
| C | -5.051071 | 0.409136  | -0.294636 |
| C | -5.183190 | 1.794162  | -0.933036 |
| C | -6.110482 | -0.551305 | -0.840048 |
| H | 3.330856  | 1.710932  | -2.049343 |
| H | 3.840248  | -0.578045 | -2.448826 |
| H | 3.550533  | -0.944676 | 0.588468  |
| H | 2.362326  | -2.793319 | -1.543994 |
| H | 2.220804  | -2.945021 | 0.202028  |
| H | 0.938008  | -0.807658 | -1.569711 |
| H | 1.527326  | -0.368891 | 1.176375  |
| H | -0.448913 | 1.092296  | 1.322672  |
| H | 0.742382  | 1.433780  | -1.471796 |
| H | 5.718939  | -1.699357 | -0.317581 |
| H | 4.892821  | -2.727631 | -1.504214 |
| H | 4.755230  | -3.082254 | 0.225055  |
| H | 2.127542  | 3.639013  | -1.641394 |
| H | 2.949058  | 4.230481  | -0.174407 |
| H | 1.207715  | 4.479298  | -0.377110 |
| H | 2.194340  | 2.430234  | 2.040159  |

|   |           |           |           |
|---|-----------|-----------|-----------|
| H | -0.201549 | -0.909113 | 3.336756  |
| H | -1.258043 | -2.405017 | 2.982804  |
| H | -3.406516 | -0.209421 | -1.588044 |
| H | -3.604527 | -1.212788 | -0.166901 |
| H | -5.195781 | 0.515292  | 0.786668  |
| H | -4.449848 | 2.494838  | -0.522911 |
| H | -5.035330 | 1.733345  | -2.018608 |
| H | -6.179028 | 2.212205  | -0.755178 |
| H | -5.981891 | -0.702706 | -1.918716 |
| H | -7.116825 | -0.152848 | -0.677062 |
| H | -6.050588 | -1.530718 | -0.354569 |

ωB97XD energy = -1230.05473727 a.u.

#### Neurolelin A (9), Conf. F

|   |           |           |           |
|---|-----------|-----------|-----------|
| C | 3.436084  | 0.930632  | -0.974316 |
| C | 3.677784  | -0.373601 | -1.151801 |
| C | 3.467622  | -1.469859 | -0.144348 |
| C | 2.191295  | -2.264879 | -0.480098 |
| C | 1.693820  | 2.427815  | 0.225369  |
| C | 2.913284  | 1.493824  | 0.294461  |
| C | 0.919579  | -1.440657 | -0.698780 |
| C | 0.450359  | -0.605026 | 0.518527  |
| C | -0.263521 | 0.713540  | 0.163195  |
| C | 0.533600  | 1.793532  | -0.568226 |
| O | 3.395035  | 1.239588  | 1.387441  |
| C | 4.682317  | -2.404152 | -0.103418 |
| C | 2.127065  | 3.739133  | -0.453876 |
| O | 1.269075  | 2.698147  | 1.539072  |
| H | -0.178817 | 2.593446  | -0.790835 |
| O | -0.144349 | -2.379347 | -0.964306 |
| C | -0.944819 | -2.535112 | 0.111516  |
| C | -0.531671 | -1.553488 | 1.156246  |
| C | -1.018386 | -1.566447 | 2.393070  |
| O | -1.832243 | -3.349236 | 0.151103  |
| O | -1.368961 | 0.323974  | -0.673444 |
| C | -2.502297 | 1.055626  | -0.613045 |
| C | -3.614405 | 0.405717  | -1.397805 |
| O | -2.585476 | 2.085808  | 0.017140  |
| C | -4.815608 | 0.003227  | -0.509743 |
| C | -4.374808 | -0.863697 | 0.673309  |
| C | -5.631281 | 1.212377  | -0.045204 |
| H | 3.518111  | 1.612596  | -1.816607 |
| H | 3.985823  | -0.700865 | -2.146326 |
| H | 3.357607  | -1.023517 | 0.845818  |
| H | 2.351072  | -2.859621 | -1.387666 |
| H | 2.007149  | -2.979175 | 0.332203  |
| H | 1.006790  | -0.829192 | -1.599234 |
| H | 1.276531  | -0.373064 | 1.194548  |
| H | -0.660071 | 1.147206  | 1.084698  |
| H | 0.902515  | 1.413581  | -1.527020 |
| H | 4.853802  | -2.871195 | -1.079998 |
| H | 4.525260  | -3.202646 | 0.627966  |
| H | 5.585840  | -1.857019 | 0.179040  |
| H | 3.014068  | 4.153237  | 0.034050  |
| H | 1.311729  | 4.459068  | -0.351122 |
| H | 2.335682  | 3.601077  | -1.518993 |

|   |           |           |           |
|---|-----------|-----------|-----------|
| H | 1.969771  | 2.375719  | 2.127683  |
| H | -0.705939 | -0.839330 | 3.136478  |
| H | -1.754560 | -2.312383 | 2.676799  |
| H | -3.946739 | 1.122016  | -2.157053 |
| H | -3.213923 | -0.475664 | -1.904012 |
| H | -5.457471 | -0.609532 | -1.155526 |
| H | -3.799709 | -1.736772 | 0.350092  |
| H | -3.754320 | -0.285455 | 1.368964  |
| H | -5.246863 | -1.219758 | 1.230735  |
| H | -5.974483 | 1.810495  | -0.896190 |
| H | -5.036185 | 1.862297  | 0.602304  |
| H | -6.513408 | 0.881944  | 0.512962  |

ωB97XD energy = -1230.05439208 a.u.

#### Neurolelin A (9), Conf. G

|   |           |           |           |
|---|-----------|-----------|-----------|
| C | -2.730599 | -1.445564 | -1.351241 |
| C | -3.093557 | -0.238509 | -1.801184 |
| C | -3.411223 | 0.972648  | -0.969068 |
| C | -2.235409 | 1.968254  | -1.001212 |
| C | -1.290713 | -2.444905 | 0.556189  |
| C | -2.589112 | -1.766105 | 0.089710  |
| C | -0.851862 | 1.391851  | -0.688793 |
| C | -0.690805 | 0.777309  | 0.724614  |
| C | 0.300622  | -0.398116 | 0.808140  |
| C | -0.041041 | -1.689190 | 0.063794  |
| O | -3.444442 | -1.504673 | 0.921078  |
| C | -4.694913 | 1.645422  | -1.468570 |
| C | -1.274422 | -3.883434 | 0.008681  |
| O | -1.289215 | -2.479322 | 1.962768  |
| H | 0.814765  | -2.356192 | 0.210260  |
| O | 0.080399  | 2.491783  | -0.745657 |
| C | 0.437806  | 2.901299  | 0.491966  |
| C | -0.143972 | 1.954555  | 1.488906  |
| C | -0.118591 | 2.176598  | 2.799289  |
| O | 1.119647  | 3.874374  | 0.685951  |
| O | 1.530735  | 0.106966  | 0.256246  |
| C | 2.693578  | -0.364942 | 0.749228  |
| C | 3.878159  | 0.253061  | 0.054378  |
| O | 2.755239  | -1.207539 | 1.615475  |
| C | 4.552738  | -0.749602 | -0.903729 |
| C | 3.587173  | -1.223025 | -1.993673 |
| C | 5.805329  | -0.119773 | -1.514843 |
| H | -2.414755 | -2.208343 | -2.058083 |
| H | -3.089576 | -0.079241 | -2.880843 |
| H | -3.579836 | 0.659154  | 0.062897  |
| H | -2.172806 | 2.441574  | -1.988589 |
| H | -2.446715 | 2.770641  | -0.283311 |
| H | -0.537978 | 0.694953  | -1.468739 |
| H | -1.647378 | 0.447614  | 1.136479  |
| H | 0.458608  | -0.638645 | 1.861956  |
| H | -0.120004 | -1.498391 | -1.011916 |
| H | -5.545534 | 0.962350  | -1.395677 |
| H | -4.593590 | 1.958417  | -2.514085 |
| H | -4.918906 | 2.535061  | -0.872324 |
| H | -1.142621 | -3.910741 | -1.077194 |
| H | -2.198935 | -4.406011 | 0.270157  |

|   |           |           |           |
|---|-----------|-----------|-----------|
| H | -0.438032 | -4.411234 | 0.472967  |
| H | -2.187086 | -2.245512 | 2.246374  |
| H | -0.545208 | 1.470893  | 3.505836  |
| H | 0.345364  | 3.078650  | 3.186475  |
| H | 3.560297  | 1.145317  | -0.493241 |
| H | 4.590364  | 0.552209  | 0.828939  |
| H | 4.855277  | -1.618986 | -0.306623 |
| H | 2.718393  | -1.739462 | -1.572464 |
| H | 3.219081  | -0.373403 | -2.580746 |
| H | 4.086992  | -1.916901 | -2.676718 |
| H | 5.545252  | 0.761207  | -2.113597 |
| H | 6.318709  | -0.830687 | -2.169913 |
| H | 6.511844  | 0.196010  | -0.740662 |

ωB97XD energy = -1230.05425330 a.u.

#### Neuroleulin A (9), Conf. H

|   |           |           |           |
|---|-----------|-----------|-----------|
| C | 2.882925  | 1.439256  | -1.306953 |
| C | 3.277267  | 0.225817  | -1.711353 |
| C | 3.540857  | -0.970542 | -0.840108 |
| C | 2.372342  | -1.970952 | -0.934625 |
| C | 1.319556  | 2.473518  | 0.480704  |
| C | 2.644793  | 1.785002  | 0.115452  |
| C | 0.970616  | -1.394557 | -0.716631 |
| C | 0.724959  | -0.755540 | 0.673126  |
| C | -0.270475 | 0.420051  | 0.678147  |
| C | 0.106352  | 1.698615  | -0.070007 |
| O | 3.441055  | 1.536806  | 1.007402  |
| C | 4.857114  | -1.647542 | -1.239067 |
| C | 1.333925  | 3.896888  | -0.104877 |
| O | 1.228698  | 2.545738  | 1.882734  |
| H | -0.762199 | 2.360799  | 0.010676  |
| O | 0.045625  | -2.498428 | -0.809720 |
| C | -0.389377 | -2.883717 | 0.410567  |
| C | 0.131124  | -1.918743 | 1.423577  |
| C | 0.022899  | -2.115947 | 2.733730  |
| O | -1.084389 | -3.852089 | 0.580325  |
| O | -1.468989 | -0.091433 | 0.064979  |
| C | -2.659164 | 0.288066  | 0.573285  |
| C | -3.803781 | -0.389197 | -0.136550 |
| O | -2.772470 | 1.079530  | 1.481051  |
| C | -4.848019 | 0.619029  | -0.642162 |
| C | -4.235145 | 1.582958  | -1.661793 |
| C | -6.047286 | -0.121131 | -1.236404 |
| H | 2.614716  | 2.189618  | -2.045937 |
| H | 3.348295  | 0.049780  | -2.786019 |
| H | 3.639743  | -0.638711 | 0.195148  |
| H | 2.374789  | -2.456563 | -1.917939 |
| H | 2.540042  | -2.763654 | -0.194665 |
| H | 0.701970  | -0.712823 | -1.526283 |
| H | 1.655172  | -0.418471 | 1.135881  |
| H | -0.486811 | 0.679600  | 1.716839  |
| H | 0.250234  | 1.489123  | -1.135290 |
| H | 5.698877  | -0.959761 | -1.121258 |
| H | 4.828709  | -1.981047 | -2.282774 |
| H | 5.042026  | -2.524349 | -0.611415 |
| H | 1.266098  | 3.894788  | -1.196890 |

|   |           |           |           |
|---|-----------|-----------|-----------|
| H | 2.240319  | 4.429220  | 0.197146  |
| H | 0.470981  | 4.434289  | 0.295284  |
| H | 2.104058  | 2.311204  | 2.229365  |
| H | 0.405000  | -1.397088 | 3.452319  |
| H | -0.465051 | -3.010822 | 3.107879  |
| H | -3.415500 | -0.995163 | -0.960486 |
| H | -4.265187 | -1.070767 | 0.587318  |
| H | -5.186766 | 1.201363  | 0.222852  |
| H | -3.407667 | 2.154858  | -1.228533 |
| H | -3.852288 | 1.036135  | -2.531981 |
| H | -4.981691 | 2.300260  | -2.016626 |
| H | -5.744654 | -0.723674 | -2.101291 |
| H | -6.812509 | 0.585625  | -1.572436 |
| H | -6.505852 | -0.792755 | -0.503400 |

ωB97XD energy = -1230.05415525 a.u.

#### Neuroleulin A (9), Conf. I

|   |           |           |           |
|---|-----------|-----------|-----------|
| C | 2.726545  | 1.282989  | -1.336349 |
| C | 3.041754  | 0.039865  | -1.719620 |
| C | 3.269708  | -1.145483 | -0.823364 |
| C | 2.038257  | -2.071955 | -0.841135 |
| C | 1.296339  | 2.456637  | 0.478025  |
| C | 2.564462  | 1.681659  | 0.083306  |
| C | 0.687148  | -1.402229 | -0.581048 |
| C | 0.535523  | -0.728153 | 0.806233  |
| C | -0.392210 | 0.501955  | 0.819683  |
| C | 0.018216  | 1.732733  | 0.010374  |
| O | 3.381380  | 1.413776  | 0.950587  |
| C | 4.522238  | -1.917529 | -1.253061 |
| C | 1.363006  | 3.854550  | -0.162360 |
| O | 1.270579  | 2.583977  | 1.878821  |
| H | -0.807509 | 2.445160  | 0.106498  |
| O | -0.311969 | -2.442719 | -0.623163 |
| C | -0.738123 | -2.770669 | 0.615947  |
| C | -0.102906 | -1.840934 | 1.595988  |
| C | -0.157728 | -2.025562 | 2.911187  |
| O | -1.509699 | -3.672018 | 0.822522  |
| O | -1.635254 | 0.021162  | 0.280474  |
| C | -2.791314 | 0.550576  | 0.730729  |
| C | -3.976369 | -0.122134 | 0.086062  |
| O | -2.836502 | 1.450573  | 1.537483  |
| C | -4.168871 | 0.232677  | -1.407189 |
| C | -4.268519 | 1.746280  | -1.614454 |
| C | -3.106842 | -0.384212 | -2.322289 |
| H | 2.471229  | 2.026786  | -2.086431 |
| H | 3.061887  | -0.168379 | -2.790749 |
| H | 3.431166  | -0.790650 | 0.196216  |
| H | 1.966658  | -2.578682 | -1.811181 |
| H | 2.187895  | -2.856659 | -0.088836 |
| H | 0.433494  | -0.716176 | -1.392104 |
| H | 1.500585  | -0.440711 | 1.229177  |
| H | -0.548652 | 0.805974  | 1.857437  |
| H | 0.101351  | 1.479619  | -1.052184 |
| H | 5.410517  | -1.282324 | -1.198363 |
| H | 4.424919  | -2.286052 | -2.280698 |
| H | 4.680027  | -2.781303 | -0.600450 |

|   |           |           |           |
|---|-----------|-----------|-----------|
| H | 1.242644  | 3.815591  | -1.249125 |
| H | 2.311445  | 4.344412  | 0.075676  |
| H | 0.551777  | 4.455787  | 0.254795  |
| H | 2.144811  | 2.312386  | 2.199401  |
| H | 0.313030  | -1.334626 | 3.604060  |
| H | -0.689029 | -2.881453 | 3.316146  |
| H | -3.856254 | -1.205603 | 0.191524  |
| H | -4.856735 | 0.189996  | 0.652533  |
| H | -5.135041 | -0.210494 | -1.679479 |
| H | -5.033940 | 2.191839  | -0.971602 |
| H | -3.315633 | 2.238186  | -1.384164 |
| H | -4.516018 | 1.977230  | -2.655334 |
| H | -2.129454 | 0.081942  | -2.164636 |
| H | -3.385156 | -0.239509 | -3.371349 |
| H | -2.990148 | -1.456673 | -2.140545 |

ωB97XD energy = -1230.05397232 a.u.

#### Neuroleulin A (9), Conf. J

|   |           |           |           |
|---|-----------|-----------|-----------|
| C | -2.793176 | -1.616647 | -1.157535 |
| C | -3.311197 | -0.443971 | -1.542198 |
| C | -3.600402 | 0.742465  | -0.665849 |
| C | -2.520077 | 1.823914  | -0.861850 |
| C | -1.033219 | -2.510269 | 0.518950  |
| C | -2.428285 | -1.924405 | 0.246626  |
| C | -1.068587 | 1.353408  | -0.735889 |
| C | -0.681024 | 0.771222  | 0.646048  |
| C | 0.394745  | -0.330754 | 0.610395  |
| C | 0.077684  | -1.643344 | -0.105807 |
| O | -3.173456 | -1.721002 | 1.192396  |
| C | -4.990472 | 1.313121  | -0.968200 |
| C | -0.974068 | -3.930066 | -0.072081 |
| O | -0.842781 | -2.577453 | 1.911048  |
| H | 1.000623  | -2.232490 | -0.070200 |
| O | -0.232787 | 2.515214  | -0.920844 |
| C | 0.258423  | 2.963032  | 0.256149  |
| C | -0.119970 | 1.993297  | 1.325654  |
| C | 0.071750  | 2.230382  | 2.619511  |
| O | 0.895319  | 3.980383  | 0.352146  |
| O | 1.524738  | 0.246247  | -0.068137 |
| C | 2.749639  | 0.099029  | 0.484508  |
| C | 3.804686  | 0.783925  | -0.345611 |
| O | 2.948467  | -0.527213 | 1.500185  |
| C | 4.624539  | -0.209542 | -1.202291 |
| C | 5.515980  | -1.114586 | -0.348547 |
| C | 3.726941  | -1.031150 | -2.132014 |
| H | -2.521045 | -2.354159 | -1.907836 |
| H | -3.472264 | -0.288839 | -2.610352 |
| H | -3.593798 | 0.421688  | 0.377588  |
| H | -2.629222 | 2.286957  | -1.850075 |
| H | -2.692369 | 2.617822  | -0.124195 |
| H | -0.811064 | 0.670716  | -1.548232 |
| H | -1.550830 | 0.383015  | 1.181015  |
| H | 0.679064  | -0.559164 | 1.639779  |
| H | -0.138789 | -1.460277 | -1.163747 |
| H | -5.070817 | 1.624933  | -2.015866 |
| H | -5.189400 | 2.187642  | -0.341563 |

|   |           |           |           |
|---|-----------|-----------|-----------|
| H | -5.767228 | 0.569165  | -0.771610 |
| H | -0.048276 | -4.399223 | 0.269138  |
| H | -0.977644 | -3.923073 | -1.166093 |
| H | -1.814431 | -4.532005 | 0.285186  |
| H | -1.703137 | -2.390463 | 2.318537  |
| H | -0.204853 | 1.505135  | 3.378613  |
| H | 0.524682  | 3.164472  | 2.937550  |
| H | 3.322246  | 1.521688  | -0.991340 |
| H | 4.472640  | 1.306995  | 0.344454  |
| H | 5.275312  | 0.414784  | -1.827521 |
| H | 6.180463  | -0.525127 | 0.290915  |
| H | 4.918444  | -1.759808 | 0.302725  |
| H | 6.135983  | -1.751483 | -0.987949 |
| H | 3.082949  | -0.388892 | -2.741179 |
| H | 3.080976  | -1.706263 | -1.558035 |
| H | 4.332308  | -1.647526 | -2.803884 |

ωB97XD energy = -1230.05324546 a.u.

#### Neuroleulin A (9), Conf. K

|   |           |           |           |
|---|-----------|-----------|-----------|
| C | 3.449951  | 1.015571  | -1.039847 |
| C | 3.731079  | -0.280632 | -1.219731 |
| C | 3.577942  | -1.382448 | -0.208326 |
| C | 2.318738  | -2.215529 | -0.517111 |
| C | 1.697692  | 2.475805  | 0.189649  |
| C | 2.938768  | 1.569271  | 0.237597  |
| C | 1.019319  | -1.426359 | -0.695947 |
| C | 0.565639  | -0.606769 | 0.537290  |
| C | -0.199087 | 0.691948  | 0.208799  |
| C | 0.529818  | 1.796901  | -0.553695 |
| O | 3.445599  | 1.328189  | 1.322198  |
| C | 4.821120  | -2.279207 | -0.194529 |
| C | 2.076534  | 3.783631  | -0.527637 |
| O | 1.307281  | 2.764701  | 1.509507  |
| H | -0.220890 | 2.569796  | -0.750338 |
| O | -0.028985 | -2.389793 | -0.936092 |
| C | -0.808250 | -2.555007 | 0.153838  |
| C | -0.378872 | -1.578450 | 1.196444  |
| C | -0.839190 | -1.602843 | 2.443210  |
| O | -1.698757 | -3.365608 | 0.202315  |
| O | -1.319387 | 0.300813  | -0.604995 |
| C | -2.570848 | 0.554293  | -0.148225 |
| C | -3.579778 | -0.150632 | -1.022588 |
| O | -2.791139 | 1.231187  | 0.827694  |
| C | -5.057426 | 0.152994  | -0.742279 |
| C | -5.502824 | -0.330104 | 0.641688  |
| C | -5.399745 | 1.629105  | -0.966986 |
| H | 3.491779  | 1.695934  | -1.886302 |
| H | 4.027388  | -0.598953 | -2.220734 |
| H | 3.476004  | -0.939493 | 0.784184  |
| H | 2.473591  | -2.799454 | -1.432541 |
| H | 2.177765  | -2.939735 | 0.295097  |
| H | 1.064766  | -0.809432 | -1.595937 |
| H | 1.404120  | -0.357415 | 1.191625  |
| H | -0.573525 | 1.109651  | 1.145487  |
| H | 0.870264  | 1.433462  | -1.529377 |
| H | 4.985505  | -2.741398 | -1.174620 |

|   |           |           |           |
|---|-----------|-----------|-----------|
| H | 4.704261  | -3.081473 | 0.540191  |
| H | 5.713677  | -1.704885 | 0.068407  |
| H | 2.967334  | 4.228074  | -0.074693 |
| H | 1.248246  | 4.486766  | -0.412046 |
| H | 2.255826  | 3.631426  | -1.596053 |
| H | 2.017935  | 2.441861  | 2.085976  |
| H | -0.525550 | -0.870889 | 3.180969  |
| H | -1.557863 | -2.360435 | 2.740385  |
| H | -3.327361 | 0.082756  | -2.063452 |
| H | -3.383372 | -1.224480 | -0.904934 |
| H | -5.612959 | -0.431651 | -1.487764 |
| H | -5.276522 | -1.392809 | 0.780043  |
| H | -5.000682 | 0.233499  | 1.432305  |
| H | -6.583185 | -0.198238 | 0.760963  |
| H | -4.895376 | 2.264427  | -0.233443 |
| H | -6.477962 | 1.790603  | -0.868190 |
| H | -5.103595 | 1.957347  | -1.969907 |

ωB97XD energy = -1230.05310623 a.u.

Swinhoeisterol F (**10**), Conf. A

|   |           |           |           |
|---|-----------|-----------|-----------|
| C | 4.511172  | -2.874739 | 0.205604  |
| C | 4.897861  | -2.164519 | -1.087687 |
| C | 4.749003  | -0.663755 | -0.908912 |
| C | 3.333276  | -0.252811 | -0.545326 |
| C | 2.844368  | -0.978872 | 0.750152  |
| C | 3.083326  | -2.499520 | 0.597566  |
| C | 3.124333  | 1.269752  | -0.492612 |
| C | 1.871781  | 1.701906  | 0.307824  |
| C | 0.803118  | 0.626771  | 0.343609  |
| C | 1.315022  | -0.748179 | 0.817026  |
| C | -0.499277 | 0.956201  | 1.115500  |
| C | -0.812440 | -0.368775 | 1.853726  |
| C | 0.578677  | -0.952010 | 2.147294  |
| C | 1.413274  | 3.073780  | -0.182113 |
| C | 0.296162  | 3.182043  | -1.202580 |
| C | -1.083568 | 2.657701  | -0.761782 |
| C | -1.086075 | 1.176604  | -0.323510 |
| C | 3.604797  | -0.480847 | 1.989911  |
| C | -0.529294 | 2.106428  | 2.116164  |
| C | 5.789661  | 0.160358  | -1.043121 |
| O | 6.197552  | -2.587926 | -1.443502 |
| O | 1.993035  | 4.068613  | 0.214022  |
| C | -2.376465 | 0.445834  | -0.702220 |
| C | -3.567191 | 1.008077  | 0.086845  |
| C | -2.615257 | 0.426256  | -2.216343 |
| C | -4.905636 | 0.304540  | -0.175094 |
| C | -4.918550 | -1.206065 | 0.108334  |
| C | -4.683734 | -1.493515 | 1.595329  |
| C | -6.195697 | -1.907992 | -0.415484 |
| C | -7.496575 | -1.301425 | 0.121420  |
| C | -6.228912 | -1.974882 | -1.946207 |
| H | 2.681801  | -0.637944 | -1.346226 |
| H | 2.174228  | 1.872226  | 1.345827  |
| H | 0.870005  | -1.447645 | 0.098082  |
| O | 0.071123  | 0.517786  | -0.903510 |

|   |           |           |           |
|---|-----------|-----------|-----------|
| H | 5.231964  | -2.600023 | 0.983447  |
| H | 4.593200  | -3.955689 | 0.055838  |
| H | 4.181531  | -2.477391 | -1.867775 |
| H | 2.805893  | -3.003741 | 1.530607  |
| H | 2.404406  | -2.883603 | -0.175964 |
| H | 3.067254  | 1.645291  | -1.520208 |
| H | 3.979732  | 1.766507  | -0.029520 |
| H | -1.406727 | -0.201670 | 2.757471  |
| H | -1.364473 | -1.074254 | 1.227190  |
| H | 0.542050  | -1.999631 | 2.460929  |
| H | 1.064545  | -0.385250 | 2.951487  |
| H | 0.605538  | 2.612597  | -2.085923 |
| H | 0.218094  | 4.237048  | -1.475420 |
| H | -1.748982 | 2.785213  | -1.619667 |
| H | -1.494488 | 3.287362  | 0.033348  |
| H | 3.352437  | -1.086880 | 2.866031  |
| H | 3.384941  | 0.560232  | 2.236220  |
| H | 4.684985  | -0.551649 | 1.835573  |
| H | -0.103100 | 3.040234  | 1.745128  |
| H | 0.028657  | 1.836484  | 3.019199  |
| H | -1.563281 | 2.309658  | 2.416019  |
| H | 5.706485  | 1.233846  | -0.921522 |
| H | 6.778427  | -0.229447 | -1.261873 |
| H | 6.418162  | -2.222853 | -2.305582 |
| H | -2.223532 | -0.595854 | -0.404747 |
| H | -3.691511 | 2.071343  | -0.157005 |
| H | -3.334277 | 0.968042  | 1.158796  |
| H | -3.341010 | -0.349087 | -2.479512 |
| H | -1.684607 | 0.207375  | -2.747536 |
| H | -3.012259 | 1.377484  | -2.587841 |
| H | -5.199390 | 0.486803  | -1.215061 |
| H | -5.670235 | 0.789128  | 0.445048  |
| H | -4.085573 | -1.663876 | -0.443954 |
| H | -4.730148 | -2.568483 | 1.798986  |
| H | -3.701677 | -1.138862 | 1.922175  |
| H | -5.434722 | -0.999251 | 2.222275  |
| H | -6.140712 | -2.943919 | -0.051420 |
| H | -8.353557 | -1.919076 | -0.166380 |
| H | -7.495513 | -1.224953 | 1.213221  |
| H | -7.664368 | -0.298924 | -0.287539 |
| H | -7.074898 | -2.579923 | -2.288632 |
| H | -5.312753 | -2.423915 | -2.345266 |
| H | -6.339184 | -0.980920 | -2.394306 |

ωB97XD energy = -1358.18121584 a.u.

Swinhoeisterol F (**10**), Conf. B

|   |          |           |           |
|---|----------|-----------|-----------|
| C | 4.450064 | -2.947857 | 0.164135  |
| C | 4.895767 | -2.193122 | -1.084043 |
| C | 4.772233 | -0.698027 | -0.846860 |
| C | 3.353874 | -0.271179 | -0.512795 |
| C | 2.803000 | -1.042252 | 0.730551  |
| C | 3.016599 | -2.559809 | 0.521170  |
| C | 3.176220 | 1.251591  | -0.395659 |
| C | 1.906122 | 1.676132  | 0.380979  |
| C | 0.811719 | 0.627185  | 0.328098  |
| C | 1.277363 | -0.780504 | 0.750811  |

|   |           |           |           |
|---|-----------|-----------|-----------|
| C | -0.508616 | 0.950578  | 1.071780  |
| C | -0.878552 | -0.403792 | 1.725022  |
| C | 0.486722  | -1.034177 | 2.040818  |
| C | 1.500161  | 3.081416  | -0.056321 |
| C | 0.426536  | 3.264157  | -1.110798 |
| C | -0.979950 | 2.760357  | -0.737231 |
| C | -1.039750 | 1.259758  | -0.372403 |
| C | 3.527697  | -0.616383 | 2.018165  |
| C | -0.547136 | 2.046411  | 2.131286  |
| C | 5.833787  | 0.107518  | -0.913184 |
| O | 6.197911  | -2.630226 | -1.413476 |
| O | 2.085226  | 4.041092  | 0.412005  |
| C | -2.340956 | 0.594405  | -0.830646 |
| C | -3.539941 | 1.175894  | -0.067514 |
| C | -2.514925 | 0.646586  | -2.353011 |
| C | -4.894655 | 0.539587  | -0.404221 |
| C | -4.992664 | -0.977272 | -0.176683 |
| C | -4.727854 | -1.338128 | 1.289304  |
| C | -6.333537 | -1.538877 | -0.710390 |
| C | -6.284920 | -3.060274 | -0.885988 |
| C | -7.547310 | -1.142073 | 0.137241  |
| H | 2.723475  | -0.604470 | -1.352963 |
| H | 2.174017  | 1.789545  | 1.435902  |
| H | 0.846710  | -1.433992 | -0.018270 |
| O | 0.117252  | 0.594241  | -0.945229 |
| H | 5.147809  | -2.720019 | 0.977475  |
| H | 4.516788  | -4.023308 | -0.027083 |
| H | 4.200452  | -2.457363 | -1.900315 |
| H | 2.695576  | -3.096523 | 1.421570  |
| H | 2.358609  | -2.897134 | -0.291289 |
| H | 3.163844  | 1.676105  | -1.405545 |
| H | 4.025581  | 1.705923  | 0.119306  |
| H | -1.508058 | -0.272698 | 2.610638  |
| H | -1.415693 | -1.062451 | 1.037634  |
| H | 0.414469  | -2.095424 | 2.296891  |
| H | 0.954128  | -0.521639 | 2.891008  |
| H | 0.751385  | 2.723348  | -2.006362 |
| H | 0.385314  | 4.331412  | -1.340893 |
| H | -1.614477 | 2.948708  | -1.607203 |
| H | -1.396933 | 3.363123  | 0.075349  |
| H | 3.239035  | -1.263132 | 2.852913  |
| H | 3.312563  | 0.413399  | 2.311167  |
| H | 4.611434  | -0.694439 | 1.895309  |
| H | -0.082370 | 2.986176  | 1.827789  |
| H | -0.031829 | 1.713246  | 3.038380  |
| H | -1.586287 | 2.262514  | 2.402900  |
| H | 5.769423  | 1.176982  | -0.750994 |
| H | 6.820630  | -0.295350 | -1.116223 |
| H | 6.454272  | -2.238440 | -2.253646 |
| H | -2.243523 | -0.464077 | -0.571282 |
| H | -3.612948 | 2.251054  | -0.276767 |
| H | -3.351324 | 1.088317  | 1.010235  |
| H | -3.255141 | -0.089936 | -2.679287 |
| H | -1.570750 | 0.415296  | -2.854134 |
| H | -2.860881 | 1.626772  | -2.699302 |
| H | -5.140565 | 0.755049  | -1.451936 |

|   |           |           |           |
|---|-----------|-----------|-----------|
| H | -5.661361 | 1.044418  | 0.197122  |
| H | -4.209194 | -1.454869 | -0.782833 |
| H | -5.383305 | -0.770337 | 1.959409  |
| H | -4.889267 | -2.402894 | 1.482046  |
| H | -3.695746 | -1.112699 | 1.571201  |
| H | -6.471768 | -1.102852 | -1.710377 |
| H | -7.202636 | -3.426553 | -1.357648 |
| H | -5.440341 | -3.361995 | -1.514912 |
| H | -6.187458 | -3.573389 | 0.077337  |
| H | -8.472706 | -1.477136 | -0.342206 |
| H | -7.621243 | -0.059040 | 0.275441  |
| H | -7.505403 | -1.607184 | 1.128385  |

ωB97XD energy = -1358.18106816 a.u.

Swinhoeisterol F (**10**), Conf. C

|   |           |           |           |
|---|-----------|-----------|-----------|
| C | -4.991145 | -2.503835 | 0.167892  |
| C | -5.465395 | -1.373976 | 1.075806  |
| C | -5.038525 | -0.037875 | 0.492877  |
| C | -3.533623 | 0.080443  | 0.327487  |
| C | -2.962486 | -1.078440 | -0.552429 |
| C | -3.475232 | -2.430062 | -0.003022 |
| C | -3.069651 | 1.469461  | -0.141465 |
| C | -1.646487 | 1.479768  | -0.750398 |
| C | -0.780853 | 0.349458  | -0.228183 |
| C | -1.427172 | -1.043941 | -0.358403 |
| C | 0.667640  | 0.267909  | -0.770582 |
| C | 0.878471  | -1.251209 | -0.987434 |
| C | -0.522254 | -1.753109 | -1.375039 |
| C | -1.054075 | 2.881432  | -0.622090 |
| C | -0.114604 | 3.209816  | 0.522921  |
| C | 1.209133  | 2.424040  | 0.576354  |
| C | 1.034113  | 0.890888  | 0.623235  |
| C | -3.407651 | -0.939232 | -2.017679 |
| C | 1.048153  | 1.011303  | -2.046878 |
| C | -5.934088 | 0.891920  | 0.156114  |
| O | -6.859000 | -1.518099 | 1.256499  |
| O | -1.392640 | 3.741664  | -1.414639 |
| C | 2.110798  | 0.198663  | 1.462352  |
| C | 3.479672  | 0.341501  | 0.784391  |
| C | 2.100650  | 0.655630  | 2.925865  |
| C | 4.544437  | -0.599893 | 1.344424  |
| C | 5.936312  | -0.461969 | 0.705258  |
| C | 6.906986  | -1.439533 | 1.377967  |
| C | 5.918191  | -0.581878 | -0.839300 |
| C | 7.313564  | -0.396515 | -1.445308 |
| C | 5.282058  | -1.880103 | -1.347702 |
| H | -3.097144 | -0.082907 | 1.325991  |
| H | -1.740844 | 1.324108  | -1.829452 |
| H | -1.233054 | -1.508426 | 0.616641  |
| O | -0.296025 | 0.585946  | 1.118231  |
| H | -5.512248 | -2.423608 | -0.792474 |
| H | -5.276624 | -3.461724 | 0.613380  |
| H | -4.954763 | -1.489447 | 2.048240  |
| H | -3.131314 | -3.239259 | -0.657834 |
| H | -3.012334 | -2.606832 | 0.977548  |
| H | -3.124546 | 2.157100  | 0.709647  |

|                                             |           |           |           |   |           |           |           |
|---------------------------------------------|-----------|-----------|-----------|---|-----------|-----------|-----------|
| H                                           | -3.741195 | 1.868672  | -0.904873 | C | 1.140659  | 0.412579  | 0.838291  |
| H                                           | 1.634234  | -1.452722 | -1.752933 | C | -3.350895 | -0.829214 | -2.059590 |
| H                                           | 1.196506  | -1.762554 | -0.075259 | C | 1.327778  | 0.387501  | -1.841372 |
| H                                           | -0.610310 | -2.843056 | -1.336853 | C | -5.692913 | 1.485620  | -0.161673 |
| H                                           | -0.766495 | -1.439948 | -2.397965 | O | -7.059890 | -0.684040 | 0.982557  |
| H                                           | -0.658495 | 3.014113  | 1.453692  | O | -0.664862 | 3.504164  | -1.498280 |
| H                                           | 0.094489  | 4.280355  | 0.460835  | C | 1.987784  | -0.360873 | 1.865057  |
| H                                           | 1.726726  | 2.759733  | 1.478656  | C | 3.496251  | -0.344034 | 1.575161  |
| H                                           | 1.855848  | 2.702868  | -0.261582 | C | 1.709105  | 0.146763  | 3.287118  |
| H                                           | -3.142468 | -1.836389 | -2.586319 | C | 3.930612  | -1.179034 | 0.371882  |
| H                                           | -2.952643 | -0.084712 | -2.523383 | C | 5.447625  | -1.262302 | 0.144007  |
| H                                           | -4.491510 | -0.809779 | -2.084452 | C | 5.730301  | -2.177664 | -1.053192 |
| H                                           | 0.753769  | 2.062136  | -2.065810 | C | 6.120321  | 0.127831  | 0.024396  |
| H                                           | 0.581719  | 0.532662  | -2.914668 | C | 7.636484  | 0.016213  | -0.168891 |
| H                                           | 2.133077  | 0.969560  | -2.194103 | C | 5.505021  | 1.015766  | -1.062661 |
| H                                           | -5.653659 | 1.852591  | -0.259464 | H | -3.136065 | 0.140012  | 1.260219  |
| H                                           | -6.996530 | 0.705235  | 0.272967  | H | -1.362437 | 1.151563  | -1.843956 |
| H                                           | -7.156265 | -0.874290 | 1.906244  | H | -1.481647 | -1.590656 | 0.755938  |
| H                                           | 1.852393  | -0.865725 | 1.473140  | O | -0.258091 | 0.353537  | 1.229690  |
| H                                           | 3.829406  | 1.380529  | 0.867548  | H | -5.751046 | -1.899098 | -0.926496 |
| H                                           | 3.350763  | 0.143848  | -0.286250 | H | -5.773075 | -2.884489 | 0.534739  |
| H                                           | 2.653956  | -0.048550 | 3.553273  | H | -5.226534 | -0.911221 | 1.901918  |
| H                                           | 1.075970  | 0.704384  | 3.305673  | H | -3.543256 | -3.070426 | -0.589422 |
| H                                           | 2.565345  | 1.638988  | 3.056297  | H | -3.429515 | -2.379639 | 1.022164  |
| H                                           | 4.195153  | -1.637263 | 1.242095  | H | -2.753791 | 2.319045  | 0.555549  |
| H                                           | 4.654098  | -0.424869 | 2.421672  | H | -3.300627 | 2.053666  | -1.087359 |
| H                                           | 6.293286  | 0.555940  | 0.925351  | H | 1.510389  | -2.127927 | -1.382995 |
| H                                           | 7.938384  | -1.286495 | 1.049225  | H | 0.912746  | -2.262809 | 0.267823  |
| H                                           | 6.886566  | -1.307161 | 2.464752  | H | -0.950077 | -3.118931 | -1.076248 |
| H                                           | 6.637181  | -2.481215 | 1.170862  | H | -0.808288 | -1.775417 | -2.213185 |
| H                                           | 5.305408  | 0.249973  | -1.211140 | H | -0.236242 | 2.823295  | 1.436677  |
| H                                           | 7.248294  | -0.280358 | -2.531997 | H | 0.778919  | 3.893296  | 0.446286  |
| H                                           | 7.807479  | 0.494113  | -1.041105 | H | 2.072941  | 2.199463  | 1.645288  |
| H                                           | 7.958245  | -1.259255 | -1.245782 | H | 2.297442  | 2.015628  | -0.075563 |
| H                                           | 5.291531  | -1.905658 | -2.442415 | H | -3.201642 | -1.786731 | -2.568793 |
| H                                           | 4.241068  | -1.984363 | -1.024858 | H | -2.726400 | -0.089558 | -2.565278 |
| H                                           | 5.831247  | -2.760385 | -0.995661 | H | -4.391211 | -0.528907 | -2.212899 |
| $\omega$ B97XD energy = -1358.18070027 a.u. |           |           |           | H | 1.195840  | 1.467733  | -1.922709 |
| Swinhoeisterol F (10), Conf. D              |           |           |           | H | 0.828760  | -0.059737 | -2.707831 |
| C                                           | -5.309811 | -2.008472 | 0.070343  | H | 2.397841  | 0.181381  | -1.942941 |
| C                                           | -5.652956 | -0.770682 | 0.892822  | H | -5.236178 | 2.366326  | -0.597426 |
| C                                           | -4.981911 | 0.447725  | 0.282297  | H | -6.777040 | 1.473057  | -0.115941 |
| C                                           | -3.469877 | 0.318514  | 0.225428  | H | -7.289413 | 0.032496  | 1.581676  |
| C                                           | -3.035325 | -0.960336 | -0.560543 | H | 1.646993  | -1.401697 | 1.836782  |
| C                                           | -3.794074 | -2.183691 | 0.004562  | H | 4.014101  | -0.725224 | 2.465649  |
| C                                           | -2.755845 | 1.589909  | -0.261978 | H | 3.828167  | 0.695391  | 1.461912  |
| C                                           | -1.312839 | 1.343434  | -0.767785 | H | 2.171908  | 1.122346  | 3.472541  |
| C                                           | -0.677035 | 0.119898  | -0.135955 | H | 2.127119  | -0.552794 | 4.017714  |
| C                                           | -1.532035 | -1.158368 | -0.251324 | H | 0.635896  | 0.234011  | 3.471301  |
| C                                           | 0.773650  | -0.222580 | -0.556874 | H | 3.459920  | -0.798987 | -0.540069 |
| C                                           | 0.745565  | -1.764370 | -0.690495 | H | 3.546355  | -2.199662 | 0.499288  |
| C                                           | -0.687143 | -2.060218 | -1.160672 | H | 5.887829  | -1.738518 | 1.033555  |
| C                                           | -0.515120 | 2.640657  | -0.652972 | H | 6.799807  | -2.355547 | -1.193310 |
| C                                           | 0.392332  | 2.875756  | 0.540500  | H | 5.250619  | -3.151490 | -0.909446 |
| C                                           | 1.563343  | 1.893720  | 0.727536  | H | 5.334138  | -1.752857 | -1.982722 |
|                                             |           |           |           | H | 5.964412  | 0.633597  | 0.986373  |

|   |          |           |           |
|---|----------|-----------|-----------|
| H | 8.114484 | 0.993002  | -0.042537 |
| H | 8.080379 | -0.672200 | 0.558977  |
| H | 7.889491 | -0.344759 | -1.171648 |
| H | 6.015636 | 1.983341  | -1.100171 |
| H | 4.443452 | 1.212731  | -0.881586 |
| H | 5.597327 | 0.558318  | -2.054106 |

ωB97XD energy = -1358.18068677 a.u.

Swinhoeisterol F (**10**), Conf. E

|   |           |           |           |
|---|-----------|-----------|-----------|
| C | -5.294977 | -2.180643 | 0.307368  |
| C | -5.596864 | -1.016103 | 1.244589  |
| C | -5.061153 | 0.274121  | 0.647796  |
| C | -3.563680 | 0.233353  | 0.397824  |
| C | -3.171441 | -0.969879 | -0.519272 |
| C | -3.791452 | -2.265460 | 0.053782  |
| C | -2.982662 | 1.569869  | -0.091945 |
| C | -1.600904 | 1.436804  | -0.777151 |
| C | -0.833086 | 0.212687  | -0.316484 |
| C | -1.632534 | -1.101680 | -0.417951 |
| C | 0.563906  | -0.015316 | -0.945324 |
| C | 0.596085  | -1.545094 | -1.185324 |
| C | -0.870622 | -1.886870 | -1.494609 |
| C | -0.857471 | 2.766282  | -0.667674 |
| C | 0.175566  | 2.970939  | 0.423853  |
| C | 1.410616  | 2.051617  | 0.384606  |
| C | 1.077437  | 0.544158  | 0.427815  |
| C | -3.685539 | -0.767366 | -1.954593 |
| C | 0.951114  | 0.701149  | -2.234863 |
| C | -5.868906 | 1.298658  | 0.368447  |
| O | -6.986411 | -1.012753 | 1.499209  |
| O | -1.147551 | 3.671730  | -1.428332 |
| C | 2.121566  | -0.270097 | 1.196364  |
| C | 3.458408  | -0.265979 | 0.444306  |
| C | 2.250987  | 0.173670  | 2.658617  |
| C | 4.483642  | -1.249865 | 1.010392  |
| C | 5.789561  | -1.363891 | 0.199799  |
| C | 5.530463  | -2.023356 | -1.162698 |
| C | 6.537459  | -0.018178 | 0.054185  |
| C | 6.754740  | 0.674761  | 1.403913  |
| C | 7.886213  | -0.193351 | -0.653701 |
| H | -3.091155 | 0.014612  | 1.368906  |
| H | -1.767981 | 1.308681  | -1.851157 |
| H | -1.431363 | -1.598414 | 0.539488  |
| O | -0.246071 | 0.375313  | 1.000564  |
| H | -5.854993 | -2.036101 | -0.623083 |
| H | -5.657512 | -3.107123 | 0.763160  |
| H | -5.051255 | -1.195699 | 2.187891  |
| H | -3.569821 | -3.100240 | -0.621401 |
| H | -3.297038 | -2.497438 | 1.006966  |
| H | -2.921208 | 2.252793  | 0.762489  |
| H | -3.648723 | 2.042965  | -0.816965 |
| H | 1.281870  | -1.817189 | -1.993459 |
| H | 0.907219  | -2.099365 | -0.296154 |
| H | -1.072179 | -2.961819 | -1.464103 |
| H | -1.138034 | -1.530112 | -2.497162 |
| H | -0.331160 | 2.809692  | 1.381859  |

|   |           |           |           |
|---|-----------|-----------|-----------|
| H | 0.491629  | 4.015317  | 0.367665  |
| H | 2.016246  | 2.316536  | 1.255189  |
| H | 2.028358  | 2.276383  | -0.490443 |
| H | -4.751664 | -0.523963 | -1.954599 |
| H | -3.551619 | -1.681198 | -2.542214 |
| H | -3.173542 | 0.040132  | -2.482886 |
| H | 0.759180  | 1.775521  | -2.233156 |
| H | 0.400829  | 0.278111  | -3.082062 |
| H | 2.019127  | 0.557340  | -2.432554 |
| H | -5.510146 | 2.229588  | -0.054296 |
| H | -6.937440 | 1.222945  | 0.541096  |
| H | -7.177987 | -0.348897 | 2.168283  |
| H | 1.748987  | -1.299807 | 1.221542  |
| H | 3.873237  | 0.750607  | 0.458340  |
| H | 3.271546  | -0.508344 | -0.609470 |
| H | 2.746622  | -0.599310 | 3.252274  |
| H | 1.263762  | 0.346011  | 3.096941  |
| H | 2.841411  | 1.090731  | 2.762424  |
| H | 4.023529  | -2.246271 | 1.060163  |
| H | 4.720009  | -0.979607 | 2.045167  |
| H | 6.449816  | -2.033963 | 0.771724  |
| H | 5.053822  | -1.325411 | -1.861200 |
| H | 6.455105  | -2.373377 | -1.628437 |
| H | 4.869768  | -2.890274 | -1.055430 |
| H | 5.918749  | 0.641652  | -0.571813 |
| H | 7.336754  | 1.593038  | 1.275959  |
| H | 5.814361  | 0.949207  | 1.890526  |
| H | 7.309477  | 0.021564  | 2.088861  |
| H | 8.411762  | 0.764265  | -0.724883 |
| H | 7.774755  | -0.582340 | -1.669300 |
| H | 8.528322  | -0.885390 | -0.094624 |

ωB97XD energy = -1358.18033768 a.u.

Swinhoeisterol F (**10**), Conf. F

|   |           |           |           |
|---|-----------|-----------|-----------|
| C | 4.368703  | -2.973072 | 0.172247  |
| C | 4.772108  | -2.271709 | -1.120714 |
| C | 4.680981  | -0.767127 | -0.933953 |
| C | 3.284707  | -0.304807 | -0.557349 |
| C | 2.776913  | -1.019730 | 0.737097  |
| C | 2.958424  | -2.547364 | 0.575545  |
| C | 3.133818  | 1.224324  | -0.493671 |
| C | 1.901904  | 1.697483  | 0.315965  |
| C | 0.794466  | 0.662192  | 0.351180  |
| C | 1.257656  | -0.733308 | 0.814010  |
| C | -0.490624 | 1.035070  | 1.132315  |
| C | -0.848502 | -0.281423 | 1.865632  |
| C | 0.521771  | -0.917747 | 2.147302  |
| C | 1.491556  | 3.088537  | -0.161958 |
| C | 0.375645  | 3.243028  | -1.177437 |
| C | -1.020685 | 2.767848  | -0.732998 |
| C | -1.076556 | 1.285420  | -0.302028 |
| C | 3.561946  | -0.557264 | 1.975419  |
| C | -0.472686 | 2.179853  | 2.139503  |
| C | 5.751227  | 0.017395  | -1.072431 |
| O | 6.052339  | -2.741879 | -1.488415 |
| O | 2.107836  | 4.059131  | 0.239042  |



|   |           |           |           |
|---|-----------|-----------|-----------|
| C | -2.396086 | 0.606843  | -0.677373 |
| C | -3.560023 | 1.206711  | 0.123911  |
| C | -2.645038 | 0.608707  | -2.190157 |
| C | -4.921259 | 0.547251  | -0.135915 |
| C | -4.989722 | -0.972549 | 0.100143  |
| C | -4.706897 | -1.297494 | 1.571212  |
| C | -6.339635 | -1.556706 | -0.383852 |
| C | -6.510603 | -1.421060 | -1.902943 |
| C | -6.510702 | -3.029788 | 0.006999  |
| H | 2.613470  | -0.659685 | -1.355896 |
| H | 2.215929  | 1.849917  | 1.353268  |
| H | 0.783101  | -1.411587 | 0.093802  |
| O | 0.051899  | 0.587023  | -0.892344 |
| H | 5.104241  | -2.728469 | 0.946368  |
| H | 4.409656  | -4.055677 | 0.017464  |
| H | 4.038994  | -2.553956 | -1.896829 |
| H | 2.668422  | -3.045699 | 1.507917  |
| H | 2.261083  | -2.902616 | -0.195357 |
| H | 3.085920  | 1.608586  | -1.518519 |
| H | 4.009519  | 1.685481  | -0.031676 |
| H | -1.429833 | -0.097174 | 2.774513  |
| H | -1.431309 | -0.962390 | 1.239915  |
| H | 0.447934  | -1.965298 | 2.454467  |
| H | 1.033151  | -0.374761 | 2.952242  |
| H | 0.660381  | 2.666667  | -2.064666 |
| H | 0.335461  | 4.301490  | -1.445255 |
| H | -1.684284 | 2.924209  | -1.587441 |
| H | -1.404898 | 3.408419  | 0.066782  |
| H | 3.296599  | -1.163248 | 2.847765  |
| H | 3.376096  | 0.487509  | 2.233251  |
| H | 4.638264  | -0.660246 | 1.812521  |
| H | -0.020848 | 3.101740  | 1.769348  |
| H | 0.085682  | 1.886729  | 3.035023  |
| H | -1.496329 | 2.414452  | 2.451747  |
| H | 5.710216  | 1.092770  | -0.945521 |
| H | 6.722575  | -0.409056 | -1.300446 |
| H | 6.279852  | -2.381542 | -2.350692 |
| H | -2.281634 | -0.442298 | -0.388728 |
| H | -3.652971 | 2.273717  | -0.117751 |
| H | -3.317525 | 1.160255  | 1.192957  |
| H | -3.400714 | -0.136654 | -2.455484 |
| H | -1.726612 | 0.359449  | -2.729256 |
| H | -3.007993 | 1.577318  | -2.551450 |
| H | -5.215231 | 0.774007  | -1.164840 |
| H | -5.670848 | 1.030060  | 0.506259  |
| H | -4.208912 | -1.456598 | -0.506473 |
| H | -4.593652 | -2.371185 | 1.739586  |
| H | -3.783252 | -0.822538 | 1.912564  |
| H | -5.522027 | -0.937357 | 2.211553  |
| H | -7.142785 | -0.983606 | 0.104787  |
| H | -7.455833 | -1.868496 | -2.226239 |
| H | -6.511805 | -0.381775 | -2.240792 |
| H | -5.700240 | -1.944196 | -2.426386 |
| H | -7.426338 | -3.439468 | -0.431177 |
| H | -6.575070 | -3.169353 | 1.089140  |
| H | -5.669045 | -3.629114 | -0.362831 |

ωB97XD energy = -1358.18027563 a.u.

Swinhoeisterol F (**10**), Conf. G

|   |           |           |           |
|---|-----------|-----------|-----------|
| C | -5.425589 | -1.879028 | 0.133886  |
| C | -5.698045 | -0.634672 | 0.972754  |
| C | -4.990180 | 0.559708  | 0.356538  |
| C | -3.486587 | 0.367495  | 0.263074  |
| C | -3.126079 | -0.920153 | -0.545915 |
| C | -3.920506 | -2.115580 | 0.029552  |
| C | -2.729960 | 1.613308  | -0.226728 |
| C | -1.312254 | 1.311194  | -0.771889 |
| C | -0.712832 | 0.053239  | -0.172621 |
| C | -1.624951 | -1.185402 | -0.279882 |
| C | 0.708793  | -0.343052 | -0.641347 |
| C | 0.611292  | -1.880273 | -0.791972 |
| C | -0.845695 | -2.111327 | -1.223188 |
| C | -0.454351 | 2.570097  | -0.668011 |
| C | 0.491873  | 2.752973  | 0.504113  |
| C | 1.622545  | 1.719822  | 0.661179  |
| C | 1.143469  | 0.256069  | 0.753993  |
| C | -3.474519 | -0.760505 | -2.034849 |
| C | 1.235338  | 0.254875  | -1.943205 |
| C | -5.666767 | 1.630633  | -0.061945 |
| O | -7.097754 | -0.489929 | 1.094855  |
| O | -0.587218 | 3.447596  | -1.501520 |
| C | 1.991176  | -0.568190 | 1.741938  |
| C | 3.504098  | -0.503236 | 1.488901  |
| C | 1.676915  | -0.165339 | 3.189130  |
| C | 3.950601  | -0.992098 | 0.113308  |
| C | 5.465789  | -1.181404 | -0.056544 |
| C | 5.754634  | -1.709764 | -1.466404 |
| C | 6.278486  | 0.086039  | 0.304796  |
| C | 7.788593  | -0.151268 | 0.197643  |
| C | 5.872332  | 1.323942  | -0.502241 |
| H | -3.136754 | 0.163277  | 1.287835  |
| H | -1.399404 | 1.134843  | -1.848186 |
| H | -1.565786 | -1.632357 | 0.720400  |
| O | -0.245388 | 0.246542  | 1.182847  |
| H | -5.885690 | -1.744485 | -0.851297 |
| H | -5.912782 | -2.739101 | 0.603637  |
| H | -5.255675 | -0.800714 | 1.971093  |
| H | -3.720634 | -3.007494 | -0.575694 |
| H | -3.539578 | -2.333186 | 1.036709  |
| H | -2.676698 | 2.330963  | 0.599237  |
| H | -3.274404 | 2.110685  | -1.032612 |
| H | 1.340778  | -2.265942 | -1.510580 |
| H | 0.782431  | -2.397862 | 0.155496  |
| H | -1.150574 | -3.158942 | -1.141042 |
| H | -0.985732 | -1.810581 | -2.268710 |
| H | -0.118342 | 2.719923  | 1.413977  |
| H | 0.920323  | 3.753652  | 0.410322  |
| H | 2.151966  | 1.989331  | 1.579434  |
| H | 2.355340  | 1.822018  | -0.146331 |
| H | -3.385029 | -1.719477 | -2.555234 |
| H | -2.827389 | -0.047710 | -2.550716 |
| H | -4.502051 | -0.407368 | -2.158946 |

|   |           |           |           |
|---|-----------|-----------|-----------|
| H | 0.617885  | -0.089471 | -2.780199 |
| H | 2.257566  | -0.079083 | -2.140045 |
| H | 1.231405  | 1.345788  | -1.975573 |
| H | -5.183632 | 2.495482  | -0.501021 |
| H | -6.749039 | 1.663442  | 0.009927  |
| H | -7.283545 | 0.229237  | 1.705839  |
| H | 1.682629  | -1.613833 | 1.636665  |
| H | 3.993747  | -1.115104 | 2.258639  |
| H | 3.854977  | 0.522583  | 1.657685  |
| H | 2.196412  | -0.835486 | 3.881231  |
| H | 0.605199  | -0.224759 | 3.388365  |
| H | 2.010406  | 0.854447  | 3.411696  |
| H | 3.597780  | -0.295702 | -0.654630 |
| H | 3.459968  | -1.950857 | -0.099850 |
| H | 5.779724  | -1.958212 | 0.657545  |
| H | 5.187970  | -2.628062 | -1.652917 |
| H | 5.461600  | -0.982949 | -2.232620 |
| H | 6.813000  | -1.942701 | -1.611446 |
| H | 6.068560  | 0.299616  | 1.361266  |
| H | 8.341617  | 0.683503  | 0.640197  |
| H | 8.085877  | -1.066978 | 0.720832  |
| H | 8.109993  | -0.240360 | -0.845724 |
| H | 6.464959  | 2.191597  | -0.194708 |
| H | 4.817667  | 1.580366  | -0.359111 |
| H | 6.040132  | 1.175753  | -1.574675 |

ωB97XD energy = -1358.18022925 a.u.

Swinhoeisterol F (**10**), Conf. H

|   |           |           |           |
|---|-----------|-----------|-----------|
| C | -5.196479 | -2.098900 | -0.084114 |
| C | -5.594795 | -0.894555 | 0.762684  |
| C | -4.940721 | 0.357566  | 0.204763  |
| C | -3.424908 | 0.270347  | 0.191376  |
| C | -2.932192 | -0.974262 | -0.615857 |
| C | -3.675230 | -2.233289 | -0.110324 |
| C | -2.732207 | 1.573763  | -0.238270 |
| C | -1.267164 | 1.379910  | -0.699739 |
| C | -0.620418 | 0.155576  | -0.080260 |
| C | -1.433930 | -1.141259 | -0.264869 |
| C | 0.852619  | -0.130544 | -0.461160 |
| C | 0.874764  | -1.667628 | -0.643363 |
| C | -0.533142 | -1.990996 | -1.170787 |
| C | -0.508220 | 2.692541  | -0.520074 |
| C | 0.334129  | 2.918819  | 0.721350  |
| C | 1.527220  | 1.968168  | 0.932681  |
| C | 1.151256  | 0.471533  | 0.969724  |
| C | -3.205153 | -0.808261 | -2.119759 |
| C | 1.414287  | 0.529585  | -1.717608 |
| C | -5.666766 | 1.386839  | -0.234946 |
| O | -7.005444 | -0.847598 | 0.816002  |
| O | -0.638497 | 3.571680  | -1.352318 |
| C | 1.987402  | -0.311100 | 1.999488  |
| C | 3.506048  | -0.147564 | 1.845961  |
| C | 1.557387  | 0.043300  | 3.429206  |
| C | 4.064179  | -0.519922 | 0.474150  |
| C | 5.598804  | -0.531063 | 0.404220  |
| C | 6.181182  | -1.777717 | 1.079295  |

|   |           |           |           |
|---|-----------|-----------|-----------|
| C | 6.129898  | -0.367603 | -1.040953 |
| C | 5.553450  | -1.397499 | -2.019402 |
| C | 5.913605  | 1.052413  | -1.576008 |
| H | -3.118034 | 0.071714  | 1.230843  |
| H | -1.274429 | 1.217214  | -1.781656 |
| H | -1.404270 | -1.602880 | 0.730035  |
| O | -0.257753 | 0.354349  | 1.305472  |
| H | -5.611956 | -1.971776 | -1.089889 |
| H | -5.649405 | -2.999380 | 0.342079  |
| H | -5.191960 | -1.052278 | 1.778846  |
| H | -3.384195 | -3.094419 | -0.723361 |
| H | -3.335605 | -2.451528 | 0.911354  |
| H | -2.778364 | 2.280414  | 0.597614  |
| H | -3.262088 | 2.044189  | -1.069616 |
| H | 1.671976  | -1.986110 | -1.321872 |
| H | 1.024460  | -2.192497 | 0.303704  |
| H | -0.766811 | -3.058872 | -1.125319 |
| H | -0.627771 | -1.679343 | -2.218258 |
| H | -0.333194 | 2.816236  | 1.584444  |
| H | 0.690288  | 3.950786  | 0.677773  |
| H | 1.977934  | 2.253976  | 1.887235  |
| H | 2.298184  | 2.143473  | 0.174900  |
| H | -3.003767 | -1.743561 | -2.651809 |
| H | -2.593769 | -0.030520 | -2.582378 |
| H | -4.250942 | -0.542182 | -2.297105 |
| H | 1.331216  | 1.617717  | -1.733173 |
| H | 0.877819  | 0.158113  | -2.597567 |
| H | 2.468596  | 0.275377  | -1.856082 |
| H | -5.221808 | 2.290174  | -0.635115 |
| H | -6.751008 | 1.343347  | -0.224206 |
| H | -7.270100 | -0.150427 | 1.423472  |
| H | 1.755448  | -1.372412 | 1.860059  |
| H | 3.975874  | -0.767925 | 2.618833  |
| H | 3.793779  | 0.887146  | 2.078676  |
| H | 1.796901  | 1.081957  | 3.683267  |
| H | 2.085017  | -0.596476 | 4.143655  |
| H | 0.483625  | -0.100921 | 3.563702  |
| H | 3.680188  | 0.196889  | -0.255781 |
| H | 3.677646  | -1.503108 | 0.173357  |
| H | 5.960535  | 0.343973  | 0.965185  |
| H | 5.848931  | -2.693435 | 0.577451  |
| H | 7.275894  | -1.761048 | 1.057792  |
| H | 5.874287  | -1.849877 | 2.127144  |
| H | 7.215680  | -0.530718 | -0.990205 |
| H | 6.035465  | -1.307216 | -2.998075 |
| H | 5.700098  | -2.424480 | -1.671060 |
| H | 4.478477  | -1.243385 | -2.169344 |
| H | 4.849298  | 1.276945  | -1.712793 |
| H | 6.397109  | 1.178263  | -2.550208 |
| H | 6.328863  | 1.802246  | -0.894207 |

ωB97XD energy = -1358.17986340 a.u.

Swinhoeisterol F (**10**), Conf. I

|   |          |           |           |
|---|----------|-----------|-----------|
| C | 4.940020 | -2.658471 | 0.032163  |
| C | 5.338919 | -1.755349 | -1.130086 |
| C | 5.021465 | -0.309663 | -0.787161 |

|   |           |           |           |
|---|-----------|-----------|-----------|
| C | 3.550829  | -0.082162 | -0.482781 |
| C | 3.054843  | -1.016299 | 0.667671  |
| C | 3.456845  | -2.473698 | 0.344613  |
| C | 3.189095  | 1.393741  | -0.248035 |
| C | 1.850118  | 1.597805  | 0.501826  |
| C | 0.893459  | 0.435716  | 0.315738  |
| C | 1.509432  | -0.939289 | 0.643177  |
| C | -0.481071 | 0.536410  | 1.022730  |
| C | -0.708638 | -0.900262 | 1.555487  |
| C | 0.712955  | -1.390269 | 1.875294  |
| C | 1.290762  | 2.978127  | 0.163431  |
| C | 0.230974  | 3.126124  | -0.911331 |
| C | -1.113915 | 2.421746  | -0.650647 |
| C | -0.994583 | 0.900283  | -0.415065 |
| C | 3.677834  | -0.617595 | 2.016060  |
| C | -0.688204 | 1.529857  | 2.161071  |
| C | 5.975048  | 0.622667  | -0.751627 |
| O | 6.697571  | -2.003631 | -1.426600 |
| O | 1.748483  | 3.956547  | 0.725493  |
| C | -2.182422 | 0.116788  | -0.979686 |
| C | -3.460969 | 0.429355  | -0.191723 |
| C | -2.347102 | 0.306944  | -2.492199 |
| C | -4.645233 | -0.461752 | -0.576236 |
| C | -5.814685 | -0.403587 | 0.417692  |
| C | -6.413001 | 1.005878  | 0.495503  |
| C | -6.902159 | -1.472302 | 0.147179  |
| C | -7.560705 | -1.344809 | -1.230902 |
| C | -6.380430 | -2.897800 | 0.358577  |
| H | 2.994341  | -0.412321 | -1.374666 |
| H | 2.067320  | 1.652323  | 1.573091  |
| H | 1.184953  | -1.571518 | -0.192962 |
| O | 0.255961  | 0.434641  | -0.987449 |
| H | 5.569913  | -2.417313 | 0.895650  |
| H | 5.144791  | -3.699093 | -0.237654 |
| H | 4.715972  | -2.033240 | -1.998888 |
| H | 3.164103  | -3.122580 | 1.178380  |
| H | 2.879685  | -2.810860 | -0.527351 |
| H | 3.163054  | 1.900185  | -1.219084 |
| H | 3.959195  | 1.895819  | 0.341862  |
| H | -1.373508 | -0.912052 | 2.424569  |
| H | -1.147716 | -1.559570 | 0.802250  |
| H | 0.763679  | -2.469925 | 2.045356  |
| H | 1.088178  | -0.897494 | 2.780944  |
| H | 0.650690  | 2.715507  | -1.836442 |
| H | 0.065608  | 4.197268  | -1.048519 |
| H | -1.732386 | 2.607494  | -1.532354 |
| H | -1.636410 | 2.893166  | 0.187549  |
| H | 3.481204  | -1.383857 | 2.772805  |
| H | 3.292062  | 0.328285  | 2.402827  |
| H | 4.762017  | -0.507578 | 1.924490  |
| H | -0.341093 | 2.542700  | 1.949340  |
| H | -0.159953 | 1.191084  | 3.058681  |
| H | -1.753524 | 1.592182  | 2.409434  |
| H | 5.771308  | 1.660771  | -0.517226 |
| H | 7.011167  | 0.364091  | -0.943712 |
| H | 6.936281  | -1.518243 | -2.221871 |

|   |           |           |           |
|---|-----------|-----------|-----------|
| H | -1.947430 | -0.942468 | -0.828968 |
| H | -3.723801 | 1.485668  | -0.332844 |
| H | -3.257741 | 0.298673  | 0.880455  |
| H | -2.813809 | 1.266350  | -2.740526 |
| H | -2.983516 | -0.478853 | -2.908702 |
| H | -1.376800 | 0.251898  | -2.994117 |
| H | -4.283377 | -1.495190 | -0.652073 |
| H | -5.003055 | -0.184044 | -1.575602 |
| H | -5.403486 | -0.636398 | 1.412281  |
| H | -7.294403 | 1.023529  | 1.145482  |
| H | -5.692513 | 1.723656  | 0.898711  |
| H | -6.716832 | 1.367779  | -0.493432 |
| H | -7.683630 | -1.302143 | 0.901702  |
| H | -8.372580 | -2.072316 | -1.333290 |
| H | -7.986705 | -0.350281 | -1.393839 |
| H | -6.842527 | -1.542567 | -2.034408 |
| H | -7.203936 | -3.618712 | 0.328975  |
| H | -5.880462 | -2.999984 | 1.328042  |
| H | -5.667336 | -3.189095 | -0.420310 |

ωB97XD energy = -1358.17975387 a.u.

#### Swinhoeisterol F (**10**), Conf. J

|   |           |           |           |
|---|-----------|-----------|-----------|
| C | 5.038636  | -2.631135 | 0.003463  |
| C | 5.439192  | -1.689005 | -1.126740 |
| C | 5.094861  | -0.258550 | -0.747968 |
| C | 3.617161  | -0.062274 | -0.456466 |
| C | 3.120722  | -1.035993 | 0.660500  |
| C | 3.548955  | -2.477378 | 0.301622  |
| C | 3.230140  | 1.400730  | -0.184308 |
| C | 1.876777  | 1.563296  | 0.549943  |
| C | 0.942062  | 0.391391  | 0.318568  |
| C | 1.574736  | -0.981743 | 0.619164  |
| C | -0.443912 | 0.452325  | 1.007797  |
| C | -0.655163 | -1.000623 | 1.501753  |
| C | 0.770281  | -1.474091 | 1.829944  |
| C | 1.298734  | 2.942544  | 0.239782  |
| C | 0.254215  | 3.100380  | -0.848543 |
| C | -1.083637 | 2.369435  | -0.626687 |
| C | -0.942482 | 0.844592  | -0.427870 |
| C | 3.720679  | -0.665784 | 2.027235  |
| C | -0.681516 | 1.414227  | 2.167229  |
| C | 6.033235  | 0.686975  | -0.674673 |
| O | 6.805396  | -1.908167 | -1.411224 |
| O | 1.729519  | 3.913268  | 0.835419  |
| C | -2.107618 | 0.056338  | -1.031875 |
| C | -3.407025 | 0.338491  | -0.266287 |
| C | -2.241274 | 0.274115  | -2.543890 |
| C | -4.566923 | -0.570535 | -0.678728 |
| C | -5.786086 | -0.499593 | 0.253521  |
| C | -6.417586 | 0.897518  | 0.238899  |
| C | -6.797552 | -1.631909 | -0.049466 |
| C | -7.839886 | -1.789051 | 1.062624  |
| C | -7.490263 | -1.488480 | -1.409274 |
| H | 3.077038  | -0.374677 | -1.364694 |
| H | 2.077452  | 1.591675  | 1.625491  |
| H | 1.269482  | -1.597619 | -0.236233 |

|                                             |           |           |           |   |           |           |           |
|---------------------------------------------|-----------|-----------|-----------|---|-----------|-----------|-----------|
| O                                           | 0.323725  | 0.414635  | -0.993363 | C | -1.326400 | -1.106461 | -0.019984 |
| H                                           | 5.653648  | -2.406439 | 0.881949  | C | 0.856109  | 0.023417  | -0.509162 |
| H                                           | 5.262262  | -3.660291 | -0.293984 | C | 1.012697  | -1.508789 | -0.354369 |
| H                                           | 4.832632  | -1.951325 | -2.011850 | C | -0.367553 | -2.052383 | -0.755036 |
| H                                           | 3.255524  | -3.154468 | 1.112308  | C | -0.757890 | 2.646328  | -1.127243 |
| H                                           | 2.988215  | -2.797558 | -0.587291 | C | 0.100164  | 3.203125  | -0.005769 |
| H                                           | 3.212207  | 1.935247  | -1.140408 | C | 1.375938  | 2.418474  | 0.352180  |
| H                                           | 3.983461  | 1.895640  | 0.432697  | C | 1.124781  | 0.945303  | 0.740895  |
| H                                           | -1.331979 | -1.044455 | 2.360493  | C | -3.143049 | -1.341404 | -1.845146 |
| H                                           | -1.072138 | -1.648842 | 0.726626  | C | 1.355127  | 0.449338  | -1.886987 |
| H                                           | 0.837681  | -2.556186 | 1.977246  | C | -5.772336 | 0.988486  | -0.415984 |
| H                                           | 1.124946  | -0.994849 | 2.751033  | O | -6.895292 | -1.073546 | 1.124619  |
| H                                           | 0.694414  | 2.717007  | -1.775757 | O | -0.998948 | 3.315924  | -2.115241 |
| H                                           | 0.074847  | 4.171862  | -0.963740 | C | 2.035392  | 0.482751  | 1.892062  |
| H                                           | -1.691040 | 2.567651  | -1.513431 | C | 3.540654  | 0.609156  | 1.609987  |
| H                                           | -1.626580 | 2.810990  | 0.214681  | C | 1.670132  | 1.213566  | 3.192408  |
| H                                           | 3.519735  | -1.451687 | 2.762376  | C | 4.088179  | -0.379757 | 0.580631  |
| H                                           | 3.321361  | 0.267371  | 2.430813  | C | 5.595760  | -0.251091 | 0.315634  |
| H                                           | 4.805054  | -0.544510 | 1.954276  | C | 6.420837  | -0.595842 | 1.561649  |
| H                                           | -0.340956 | 2.435218  | 1.985967  | C | 6.058831  | -1.071308 | -0.914078 |
| H                                           | -0.164253 | 1.058497  | 3.064652  | C | 5.780965  | -2.573415 | -0.788757 |
| H                                           | -1.751312 | 1.459247  | 2.399448  | C | 5.480148  | -0.535349 | -2.228189 |
| H                                           | 5.810690  | 1.715124  | -0.414596 | H | -3.103167 | 0.250734  | 1.232176  |
| H                                           | 7.075500  | 0.449414  | -0.860707 | H | -1.405260 | 0.871566  | -2.015488 |
| H                                           | 7.047574  | -1.395103 | -2.187848 | H | -1.239595 | -1.335291 | 1.049643  |
| H                                           | -1.861778 | -1.002347 | -0.895895 | O | -0.264335 | 0.796261  | 1.144640  |
| H                                           | -3.686730 | 1.390471  | -0.407227 | H | -5.415133 | -2.462179 | -0.521278 |
| H                                           | -3.222784 | 0.205164  | 0.809074  | H | -5.347705 | -3.146935 | 1.101750  |
| H                                           | -2.721645 | 1.229012  | -2.783646 | H | -5.066947 | -0.899518 | 2.065089  |
| H                                           | -2.850718 | -0.515701 | -2.991772 | H | -3.090226 | -3.272372 | 0.022840  |
| H                                           | -1.258905 | 0.249282  | -3.024143 | H | -3.091098 | -2.282092 | 1.474707  |
| H                                           | -4.203521 | -1.607928 | -0.705182 | H | -2.958516 | 2.287715  | 0.139648  |
| H                                           | -4.875518 | -0.324951 | -1.702527 | H | -3.446589 | 1.669636  | -1.425690 |
| H                                           | -5.418279 | -0.686019 | 1.274414  | H | 1.826846  | -1.900833 | -0.971527 |
| H                                           | -7.322656 | 0.941527  | 0.851641  | H | 1.221785  | -1.797419 | 0.678909  |
| H                                           | -5.724267 | 1.646395  | 0.632531  | H | -0.507971 | -3.102570 | -0.482460 |
| H                                           | -6.684705 | 1.199309  | -0.780354 | H | -0.504063 | -1.974723 | -1.840897 |
| H                                           | -6.212772 | -2.562899 | -0.074693 | H | -0.530368 | 3.241881  | 0.889749  |
| H                                           | -8.444040 | -2.687407 | 0.899022  | H | 0.362760  | 4.225463  | -0.288066 |
| H                                           | -7.364479 | -1.878561 | 2.045435  | H | 1.832302  | 2.946416  | 1.193814  |
| H                                           | -8.527506 | -0.936852 | 1.095902  | H | 2.104116  | 2.472123  | -0.463321 |
| H                                           | -8.128078 | -2.356442 | -1.605850 | H | -2.879790 | -2.354684 | -2.165521 |
| H                                           | -6.772524 | -1.414553 | -2.231785 | H | -2.598084 | -0.644577 | -2.485711 |
| H                                           | -8.130462 | -0.599607 | -1.436735 | H | -4.208204 | -1.194643 | -2.044625 |
| $\omega$ B97XD energy = -1358.17965149 a.u. |           |           |           | H | 1.088263  | 1.468861  | -2.169886 |
| Swinhoeisterol F ( <b>10</b> ), Conf. K     |           |           |           | H | 0.939320  | -0.214188 | -2.652897 |
| C                                           | -4.983116 | -2.326093 | 0.476440  | H | 2.444767  | 0.371497  | -1.947666 |
| C                                           | -5.486591 | -1.005291 | 1.048915  | H | -5.415064 | 1.819802  | -1.012223 |
| C                                           | -4.952153 | 0.147654  | 0.216595  | H | -6.847817 | 0.852728  | -0.367015 |
| C                                           | -3.434421 | 0.192553  | 0.182829  | H | -7.220797 | -0.287127 | 1.572643  |
| C                                           | -2.837620 | -1.149990 | -0.350199 | H | 1.815421  | -0.576832 | 2.063495  |
| C                                           | -3.456430 | -2.326862 | 0.439613  | H | 4.058868  | 0.458740  | 2.564187  |
| C                                           | -2.864789 | 1.428376  | -0.533287 | H | 3.778471  | 1.636350  | 1.299948  |
| C                                           | -1.395725 | 1.264524  | -0.994253 | H | 1.999618  | 2.258426  | 3.183529  |
| C                                           | -0.630658 | 0.263678  | -0.149942 | H | 2.162268  | 0.727638  | 4.040665  |
|                                             |           |           |           | H | 0.591663  | 1.193688  | 3.365118  |

|   |          |           |           |
|---|----------|-----------|-----------|
| H | 3.552449 | -0.246199 | -0.362009 |
| H | 3.863805 | -1.400533 | 0.918569  |
| H | 5.796638 | 0.803494  | 0.071909  |
| H | 7.492067 | -0.602012 | 1.333760  |
| H | 6.262744 | 0.131582  | 2.362911  |
| H | 6.155951 | -1.583240 | 1.956624  |
| H | 7.148948 | -0.941212 | -0.969442 |
| H | 6.206708 | -3.111980 | -1.641568 |
| H | 6.215074 | -2.998770 | 0.121048  |
| H | 4.704082 | -2.776958 | -0.777162 |
| H | 5.971878 | -1.005712 | -3.085935 |
| H | 5.617062 | 0.548064  | -2.315723 |
| H | 4.409241 | -0.749084 | -2.317483 |

ωB97XD energy = -1358.17956162 a.u.

Swinhoeisterol F (**10**), Conf. L

|   |           |           |           |
|---|-----------|-----------|-----------|
| C | 4.528954  | -2.768879 | -0.082180 |
| C | 5.052511  | -1.784323 | -1.122676 |
| C | 4.791790  | -0.361293 | -0.659624 |
| C | 3.318263  | -0.077551 | -0.425206 |
| C | 2.701706  | -1.079391 | 0.602577  |
| C | 3.042065  | -2.523033 | 0.165197  |
| C | 3.017637  | 1.390154  | -0.081276 |
| C | 1.649454  | 1.605026  | 0.610444  |
| C | 0.640918  | 0.524071  | 0.267545  |
| C | 1.167294  | -0.907868 | 0.499040  |
| C | -0.765848 | 0.640566  | 0.907559  |
| C | -1.093321 | -0.826755 | 1.272333  |
| C | 0.274722  | -1.421170 | 1.636730  |
| C | 1.194327  | 3.041461  | 0.369153  |
| C | 0.220096  | 3.341491  | -0.751558 |
| C | -1.178614 | 2.715191  | -0.607698 |
| C | -1.179237 | 1.170763  | -0.515863 |
| C | 3.261281  | -0.844384 | 2.015406  |
| C | -0.964723 | 1.529463  | 2.130797  |
| C | 5.789866  | 0.503867  | -0.471818 |
| O | 6.412565  | -2.085074 | -1.358294 |
| O | 1.661349  | 3.936499  | 1.049847  |
| C | -2.363833 | 0.548532  | -1.278349 |
| C | -3.740194 | 1.051972  | -0.804704 |
| C | -2.203420 | 0.764264  | -2.790083 |
| C | -4.285078 | 0.437716  | 0.489191  |
| C | -4.589354 | -1.071421 | 0.461327  |
| C | -5.132359 | -1.497906 | 1.829868  |
| C | -5.488800 | -1.498644 | -0.722743 |
| C | -5.698486 | -3.016330 | -0.759847 |
| C | -6.835919 | -0.770332 | -0.767834 |
| H | 2.805248  | -0.296643 | -1.375514 |
| H | 1.806419  | 1.547319  | 1.691933  |
| H | 0.861455  | -1.441960 | -0.409367 |
| O | 0.074980  | 0.671887  | -1.057791 |
| H | 5.116457  | -2.654373 | 0.835375  |
| H | 4.690208  | -3.788607 | -0.445191 |
| H | 4.475580  | -1.940385 | -2.051384 |
| H | 2.664715  | -3.227117 | 0.916017  |
| H | 2.501158  | -2.742428 | -0.765569 |

|   |           |           |           |
|---|-----------|-----------|-----------|
| H | 3.075478  | 1.977926  | -1.004027 |
| H | 3.775030  | 1.796587  | 0.592680  |
| H | -1.830842 | -0.898795 | 2.077558  |
| H | -1.488923 | -1.378016 | 0.416139  |
| H | 0.257567  | -2.512634 | 1.711084  |
| H | 0.615401  | -1.031022 | 2.604091  |
| H | 0.662218  | 2.968033  | -1.681590 |
| H | 0.130523  | 4.428421  | -0.816205 |
| H | -1.744834 | 3.030150  | -1.488289 |
| H | -1.699501 | 3.144720  | 0.253665  |
| H | 2.951281  | -1.647908 | 2.691225  |
| H | 2.928482  | 0.098558  | 2.454871  |
| H | 4.354494  | -0.822753 | 2.001301  |
| H | -0.530130 | 2.526346  | 2.037910  |
| H | -0.508685 | 1.063863  | 3.010888  |
| H | -2.031428 | 1.655517  | 2.342916  |
| H | 5.627681  | 1.524594  | -0.146492 |
| H | 6.820766  | 0.202007  | -0.624902 |
| H | 6.728296  | -1.545790 | -2.089401 |
| H | -2.312271 | -0.533380 | -1.120753 |
| H | -4.459580 | 0.875241  | -1.612775 |
| H | -3.709803 | 2.141864  | -0.687777 |
| H | -2.920756 | 0.138058  | -3.329993 |
| H | -1.197029 | 0.497405  | -3.121432 |
| H | -2.398179 | 1.802358  | -3.081178 |
| H | -5.202338 | 0.974601  | 0.764934  |
| H | -3.581533 | 0.622671  | 1.308833  |
| H | -3.640210 | -1.604136 | 0.318826  |
| H | -5.267792 | -2.580510 | 1.901016  |
| H | -4.436288 | -1.201201 | 2.621964  |
| H | -6.094723 | -1.021087 | 2.046975  |
| H | -4.942696 | -1.238190 | -1.639723 |
| H | -6.162776 | -3.318315 | -1.704181 |
| H | -4.746960 | -3.551619 | -0.666035 |
| H | -6.355990 | -3.352518 | 0.049148  |
| H | -7.421149 | -1.103368 | -1.631178 |
| H | -6.715495 | 0.314277  | -0.850356 |
| H | -7.429877 | -0.975797 | 0.129615  |

ωB97XD energy = -1358.17939029 a.u.

Swinhoeisterol F (**10**), Conf. M

|   |           |           |           |
|---|-----------|-----------|-----------|
| C | -4.059859 | 0.898103  | 1.256860  |
| C | -4.181292 | 0.929239  | -0.263417 |
| C | -3.623025 | -0.355862 | -0.849878 |
| C | -2.165755 | -0.583545 | -0.489841 |
| C | -1.955343 | -0.583168 | 1.058211  |
| C | -2.602007 | 0.686459  | 1.658868  |
| C | -1.540369 | -1.809138 | -1.174208 |
| C | -0.243671 | -2.311035 | -0.492105 |
| C | 0.473066  | -1.218159 | 0.277050  |
| C | -0.428041 | -0.479702 | 1.285598  |
| C | 1.789315  | -1.610754 | 0.994688  |
| C | 1.667598  | -0.909584 | 2.374422  |
| C | 0.154649  | -0.898351 | 2.640881  |
| C | 0.603377  | -3.063159 | -1.514899 |
| C | 1.736681  | -2.348038 | -2.224706 |

|   |           |           |           |
|---|-----------|-----------|-----------|
| C | 2.892611  | -1.828251 | -1.348365 |
| C | 2.462839  | -0.864415 | -0.215046 |
| C | -2.598757 | -1.820594 | 1.705524  |
| C | 2.121484  | -3.081396 | 1.231440  |
| C | -4.380217 | -1.174500 | -1.582348 |
| O | -5.533176 | 1.183080  | -0.584897 |
| O | 0.318056  | -4.213159 | -1.794445 |
| C | 3.563815  | 0.194202  | 0.033445  |
| C | 3.031688  | 1.583252  | 0.429500  |
| C | 4.617446  | -0.354190 | 1.004777  |
| C | 2.651496  | 2.433658  | -0.785441 |
| C | 1.891492  | 3.726269  | -0.447460 |
| C | 1.934761  | 4.684235  | -1.643909 |
| C | 0.451145  | 3.458912  | 0.058583  |
| C | -0.163791 | 4.696608  | 0.720107  |
| C | -0.483009 | 2.912637  | -1.024558 |
| H | -1.617243 | 0.299582  | -0.849428 |
| H | -0.521530 | -3.072936 | 0.242728  |
| H | -0.169501 | 0.575973  | 1.136707  |
| O | 1.181616  | -0.286637 | -0.578079 |
| H | -4.707172 | 0.102533  | 1.642410  |
| H | -4.433134 | 1.843333  | 1.663170  |
| H | -3.553956 | 1.759014  | -0.633073 |
| H | -2.514260 | 0.652074  | 2.751200  |
| H | -2.025024 | 1.561772  | 1.331069  |
| H | -1.346469 | -1.557309 | -2.222745 |
| H | -2.237467 | -2.650196 | -1.183142 |
| H | 2.229628  | -1.443828 | 3.146551  |
| H | 2.037182  | 0.115471  | 2.362705  |
| H | -0.128524 | -0.223893 | 3.454542  |
| H | -0.188041 | -1.904380 | 2.913680  |
| H | 1.296201  | -1.487144 | -2.740017 |
| H | 2.127618  | -3.039361 | -2.975069 |
| H | 3.568521  | -1.294413 | -2.023240 |
| H | 3.470704  | -2.663661 | -0.940732 |
| H | -2.600975 | -1.727442 | 2.796316  |
| H | -2.082482 | -2.750843 | 1.457813  |
| H | -3.635883 | -1.934136 | 1.377849  |
| H | 1.460286  | -3.494911 | 2.000644  |
| H | 3.149659  | -3.173223 | 1.598261  |
| H | 2.025647  | -3.720386 | 0.352094  |
| H | -4.000005 | -2.092077 | -2.015705 |
| H | -5.428055 | -0.953567 | -1.757045 |
| H | -5.607680 | 1.308745  | -1.535544 |
| H | 4.078754  | 0.340348  | -0.925572 |
| H | 3.802340  | 2.109869  | 1.008001  |
| H | 2.164222  | 1.487631  | 1.083766  |
| H | 4.225878  | -0.453137 | 2.020864  |
| H | 5.480275  | 0.317470  | 1.044404  |
| H | 4.978936  | -1.338416 | 0.687155  |
| H | 2.054086  | 1.826204  | -1.474328 |
| H | 3.572058  | 2.696088  | -1.324858 |
| H | 2.425668  | 4.212460  | 0.383723  |
| H | 1.370239  | 5.603254  | -1.459749 |
| H | 2.968414  | 4.970389  | -1.863327 |
| H | 1.527595  | 4.212034  | -2.544724 |

|   |           |          |           |
|---|-----------|----------|-----------|
| H | 0.524687  | 2.689780 | 0.839112  |
| H | -1.124399 | 4.450455 | 1.185563  |
| H | 0.493307  | 5.099608 | 1.498335  |
| H | -0.350790 | 5.492891 | -0.008872 |
| H | -1.466895 | 2.695025 | -0.595594 |
| H | -0.098921 | 1.986243 | -1.461823 |
| H | -0.635438 | 3.642335 | -1.827355 |

ωB97XD energy = -1358.17926740 a.u.

Swinhoeisterol F (**10**), Conf. N

|   |           |           |           |
|---|-----------|-----------|-----------|
| C | -5.198512 | -2.177962 | 0.206584  |
| C | -5.631163 | -0.881772 | 0.883445  |
| C | -5.010158 | 0.301139  | 0.160814  |
| C | -3.492590 | 0.253565  | 0.148764  |
| C | -2.967611 | -1.075562 | -0.484823 |
| C | -3.673988 | -2.272504 | 0.193435  |
| C | -2.839132 | 1.505011  | -0.460249 |
| C | -1.370265 | 1.290968  | -0.900290 |
| C | -0.687184 | 0.180479  | -0.123811 |
| C | -1.464264 | -1.151240 | -0.125579 |
| C | 0.792733  | -0.114509 | -0.469778 |
| C | 0.856295  | -1.660585 | -0.442379 |
| C | -0.542654 | -2.088877 | -0.916658 |
| C | -0.646398 | 2.635316  | -0.905460 |
| C | 0.189184  | 3.050324  | 0.290494  |
| C | 1.411463  | 2.172527  | 0.618592  |
| C | 1.077465  | 0.685380  | 0.863459  |
| C | -3.251604 | -1.124495 | -1.995302 |
| C | 1.336441  | 0.382970  | -1.806344 |
| C | -5.765250 | 1.243230  | -0.406958 |
| O | -7.042566 | -0.866122 | 0.932261  |
| O | -0.799092 | 3.388416  | -1.849925 |
| C | 1.936050  | 0.075919  | 1.987166  |
| C | 3.449732  | 0.254878  | 1.805251  |
| C | 1.496084  | 0.613702  | 3.355355  |
| C | 4.014203  | -0.292156 | 0.495640  |
| C | 5.549365  | -0.324220 | 0.433030  |
| C | 6.116887  | -1.477966 | 1.267389  |
| C | 6.046061  | -0.323375 | -1.033140 |
| C | 7.568643  | -0.190634 | -1.131641 |
| C | 5.561159  | -1.530031 | -1.844700 |
| H | -3.175686 | 0.206919  | 1.203164  |
| H | -1.375148 | 0.982555  | -1.950033 |
| H | -1.417729 | -1.473810 | 0.922289  |
| O | -0.327702 | 0.577094  | 1.219711  |
| H | -5.616932 | -2.200673 | -0.805647 |
| H | -5.626337 | -3.025022 | 0.751663  |
| H | -5.226376 | -0.890268 | 1.911004  |
| H | -3.359750 | -3.201427 | -0.296608 |
| H | -3.327969 | -2.339529 | 1.233988  |
| H | -2.903612 | 2.316568  | 0.272712  |
| H | -3.385735 | 1.841209  | -1.344094 |
| H | 1.662160  | -2.046433 | -1.074264 |
| H | 1.018699  | -2.050552 | 0.565961  |
| H | -0.747063 | -3.147446 | -0.730513 |
| H | -0.647730 | -1.919647 | -1.995371 |

|                                             |           |           |           |   |           |           |           |
|---------------------------------------------|-----------|-----------|-----------|---|-----------|-----------|-----------|
| H                                           | -0.472493 | 3.040398  | 1.163960  | O | -1.661683 | 3.959133  | -1.120101 |
| H                                           | 0.512073  | 4.078283  | 0.109657  | C | 2.435108  | 0.635787  | 1.158986  |
| H                                           | 1.858447  | 2.599903  | 1.520488  | C | 3.722278  | 1.027534  | 0.418882  |
| H                                           | 2.172438  | 2.261962  | -0.163634 | C | 2.467706  | 0.971826  | 2.653838  |
| H                                           | -2.661096 | -0.404761 | -2.566480 | C | 5.043816  | 0.435797  | 0.932774  |
| H                                           | -4.304187 | -0.908904 | -2.198903 | C | 5.267471  | -1.090436 | 0.815554  |
| H                                           | -3.031223 | -2.119084 | -2.396245 | C | 4.583541  | -1.879141 | 1.942486  |
| H                                           | 1.220654  | 1.455440  | -1.971323 | C | 4.928452  | -1.650043 | -0.583832 |
| H                                           | 0.812919  | -0.121932 | -2.625744 | C | 5.707335  | -0.931344 | -1.691778 |
| H                                           | 2.398309  | 0.143601  | -1.909909 | C | 5.184874  | -3.158416 | -0.679466 |
| H                                           | -5.346309 | 2.098866  | -0.923305 | H | -2.736362 | -0.262946 | 1.359714  |
| H                                           | -6.847760 | 1.171166  | -0.383627 | H | -1.777016 | 1.561136  | -1.731740 |
| H                                           | -7.327401 | -0.102989 | 1.443652  | H | -0.777350 | -1.389132 | 0.400791  |
| H                                           | 1.731973  | -1.000439 | 1.997729  | O | -0.020002 | 0.746017  | 1.020666  |
| H                                           | 3.934957  | -0.242965 | 2.653744  | H | -5.019929 | -2.680307 | -0.814175 |
| H                                           | 3.713362  | 1.317740  | 1.895030  | H | -4.570705 | -3.792427 | 0.477809  |
| H                                           | 2.034396  | 0.088755  | 4.151012  | H | -4.376294 | -1.921231 | 2.060566  |
| H                                           | 0.425253  | 0.466796  | 3.508802  | H | -2.560409 | -3.216368 | -0.900784 |
| H                                           | 1.713324  | 1.681956  | 3.466606  | H | -2.396122 | -2.711714 | 0.774917  |
| H                                           | 3.647929  | 0.329093  | -0.328442 | H | -3.038401 | 2.002670  | 0.966530  |
| H                                           | 3.617003  | -1.301347 | 0.322800  | H | -3.743432 | 1.796872  | -0.624768 |
| H                                           | 5.913436  | 0.614832  | 0.877588  | H | 1.885742  | -0.820653 | -2.127906 |
| H                                           | 7.209343  | -1.449661 | 1.310567  | H | 1.589410  | -1.299758 | -0.457873 |
| H                                           | 5.752320  | -1.432912 | 2.298129  | H | -0.162979 | -2.477416 | -1.707189 |
| H                                           | 5.818324  | -2.448761 | 0.856734  | H | -0.552767 | -1.015438 | -2.619021 |
| H                                           | 5.611871  | 0.575532  | -1.494983 | H | -0.633378 | 3.046182  | 1.616568  |
| H                                           | 7.874506  | -0.016487 | -2.168326 | H | -0.123448 | 4.498307  | 0.725045  |
| H                                           | 7.935853  | 0.645905  | -0.526973 | H | 1.770390  | 3.121349  | 1.417458  |
| H                                           | 8.073893  | -1.100834 | -0.790468 | H | 1.723103  | 3.225222  | -0.325562 |
| H                                           | 5.877829  | -1.438861 | -2.888751 | H | -4.287112 | -0.847960 | -2.005730 |
| H                                           | 4.469996  | -1.619082 | -1.837289 | H | -2.875155 | -1.661159 | -2.691650 |
| H                                           | 5.978196  | -2.465876 | -1.456551 | H | -2.875285 | 0.088025  | -2.474012 |
| $\omega$ B97XD energy = -1358.17924268 a.u. |           |           |           | H | 0.564352  | 2.577886  | -2.102080 |
| Swinhoeisterol F (10), Conf. O              |           |           |           | H | 0.556638  | 1.106677  | -3.063123 |
| C                                           | -4.426330 | -2.774874 | 0.101731  | H | 2.073752  | 1.707443  | -2.385036 |
| C                                           | -4.959958 | -1.785813 | 1.132878  | H | -5.590937 | 1.499221  | 0.111616  |
| C                                           | -4.723363 | -0.365158 | 0.650147  | H | -6.761235 | 0.163862  | 0.611479  |
| C                                           | -3.254947 | -0.061678 | 0.408508  | H | -6.635197 | -1.559942 | 2.103552  |
| C                                           | -2.626567 | -1.066329 | -0.609931 | H | 2.301814  | -0.445751 | 1.084496  |
| C                                           | -2.944349 | -2.509916 | -0.155512 | H | 3.824577  | 2.120332  | 0.461036  |
| C                                           | -2.977181 | 1.407182  | 0.048985  | H | 3.601675  | 0.780206  | -0.643484 |
| C                                           | -1.615859 | 1.634006  | -0.651758 | H | 3.128887  | 0.285945  | 3.188822  |
| C                                           | -0.591221 | 0.571623  | -0.301574 | H | 1.469168  | 0.878406  | 3.090334  |
| C                                           | -1.094139 | -0.871223 | -0.513144 | H | 2.835204  | 1.986673  | 2.841608  |
| C                                           | 0.808378  | 0.703652  | -0.953016 | H | 5.186103  | 0.724117  | 1.981683  |
| C                                           | 1.163006  | -0.761104 | -1.308121 | H | 5.848947  | 0.939435  | 0.385005  |
| C                                           | -0.198586 | -1.385454 | -1.648584 | H | 6.350293  | -1.237330 | 0.953630  |
| C                                           | -1.177194 | 3.079627  | -0.431393 | H | 3.504156  | -1.976929 | 1.786219  |
| C                                           | -0.199385 | 3.409405  | 0.678649  | H | 4.994875  | -2.888616 | 2.027083  |
| C                                           | 1.206495  | 2.797246  | 0.538964  | H | 4.739359  | -1.387723 | 2.907921  |
| C                                           | 1.219564  | 1.253798  | 0.458268  | H | 3.856519  | -1.487210 | -0.759777 |
| C                                           | -3.193762 | -0.854657 | -2.023436 | H | 5.471241  | -1.360690 | -2.670807 |
| C                                           | 1.004127  | 1.582112  | -2.183813 | H | 5.486008  | 0.138514  | -1.739356 |
| C                                           | -5.735812 | 0.480869  | 0.452296  | H | 6.787347  | -1.041674 | -1.533445 |
| O                                           | -6.314111 | -2.104554 | 1.378751  | H | 5.007337  | -3.514490 | -1.699462 |
|                                             |           |           |           | H | 4.536043  | -3.734005 | -0.014151 |

H 6.225964 -3.391643 -0.422803  
 ωB97XD energy = -1358.17913501 a.u.

Swinhoeisterol F (**10**), Conf. P

|   |           |           |           |
|---|-----------|-----------|-----------|
| C | 4.485157  | -2.746202 | -0.213343 |
| C | 5.002966  | -1.722142 | -1.218195 |
| C | 4.758205  | -0.319164 | -0.689858 |
| C | 3.288750  | -0.036085 | -0.430462 |
| C | 2.676812  | -1.074940 | 0.562905  |
| C | 3.003114  | -2.501503 | 0.062825  |
| C | 2.998902  | 1.418600  | -0.026824 |
| C | 1.640423  | 1.610661  | 0.689917  |
| C | 0.621548  | 0.550681  | 0.314280  |
| C | 1.142112  | -0.891641 | 0.483388  |
| C | -0.775863 | 0.651306  | 0.977211  |
| C | -1.108968 | -0.828368 | 1.288967  |
| C | 0.260465  | -1.444489 | 1.610680  |
| C | 1.189441  | 3.058230  | 0.520165  |
| C | 0.210889  | 3.412421  | -0.580134 |
| C | -1.190125 | 2.786915  | -0.455756 |
| C | -1.200198 | 1.240902  | -0.415842 |
| C | 3.253142  | -0.900384 | 1.977814  |
| C | -0.971189 | 1.490467  | 2.234928  |
| C | 5.764947  | 0.528189  | -0.470033 |
| O | 6.357895  | -2.021499 | -1.483193 |
| O | 1.662704  | 3.918526  | 1.240195  |
| C | -2.424145 | 0.654962  | -1.132368 |
| C | -3.727299 | 1.159836  | -0.485344 |
| C | -2.369811 | 0.923991  | -2.641389 |
| C | -5.021578 | 0.466693  | -0.957663 |
| C | -5.602522 | -0.588374 | 0.000755  |
| C | -6.941451 | -1.098192 | -0.542806 |
| C | -4.608948 | -1.723317 | 0.335224  |
| C | -5.090215 | -2.589600 | 1.503551  |
| C | -4.246279 | -2.602834 | -0.865443 |
| H | 2.765921  | -0.215316 | -1.383737 |
| H | 1.809655  | 1.503155  | 1.765770  |
| H | 0.822732  | -1.388581 | -0.441167 |
| O | 0.037752  | 0.751841  | -0.998474 |
| H | 5.085490  | -2.674760 | 0.700267  |
| H | 4.634438  | -3.750641 | -0.621471 |
| H | 4.413546  | -1.833913 | -2.145402 |
| H | 2.630648  | -3.232994 | 0.789504  |
| H | 2.449684  | -2.680083 | -0.869221 |
| H | 3.047330  | 2.041578  | -0.926801 |
| H | 3.765773  | 1.796646  | 0.652900  |
| H | -1.832010 | -0.925113 | 2.104827  |
| H | -1.521989 | -1.347820 | 0.420414  |
| H | 0.237335  | -2.537978 | 1.641265  |
| H | 0.615237  | -1.095418 | 2.588583  |
| H | 0.646491  | 3.078829  | -1.528203 |
| H | 0.126272  | 4.501567  | -0.596237 |
| H | -1.754001 | 3.131293  | -1.326683 |
| H | -1.711562 | 3.189609  | 0.418216  |
| H | 2.952350  | -1.733137 | 2.621696  |
| H | 2.924168  | 0.021950  | 2.461699  |

|   |           |           |           |
|---|-----------|-----------|-----------|
| H | 4.346051  | -0.876127 | 1.951337  |
| H | -0.546693 | 2.494453  | 2.175997  |
| H | -0.506860 | 0.997400  | 3.095612  |
| H | -2.039938 | 1.594576  | 2.451929  |
| H | 5.613967  | 1.533329  | -0.094439 |
| H | 6.792023  | 0.224877  | -0.644642 |
| H | 6.669742  | -1.450095 | -2.191229 |
| H | -2.369635 | -0.430260 | -1.010062 |
| H | -3.810745 | 2.235185  | -0.682157 |
| H | -3.646157 | 1.062203  | 0.606571  |
| H | -2.590056 | 1.969589  | -2.882529 |
| H | -3.101505 | 0.309415  | -3.173287 |
| H | -1.380776 | 0.680107  | -3.037738 |
| H | -4.871232 | 0.011687  | -1.944205 |
| H | -5.796349 | 1.227576  | -1.107585 |
| H | -5.806049 | -0.073229 | 0.952252  |
| H | -7.403577 | -1.829471 | 0.126768  |
| H | -7.648386 | -0.271031 | -0.664078 |
| H | -6.817530 | -1.570122 | -1.523875 |
| H | -3.690884 | -1.232670 | 0.675044  |
| H | -4.304473 | -3.285188 | 1.816978  |
| H | -5.360456 | -1.975054 | 2.369394  |
| H | -5.965445 | -3.189474 | 1.230638  |
| H | -3.449651 | -3.304579 | -0.595928 |
| H | -3.894312 | -2.016480 | -1.720085 |
| H | -5.105071 | -3.196162 | -1.198026 |

ωB97XD energy = -1358.17890982 a.u.

Swinhoeisterol F (**10**), Conf. Q

|   |           |           |           |
|---|-----------|-----------|-----------|
| C | -5.207057 | -2.256953 | -0.128335 |
| C | -5.557889 | -1.240153 | 0.952739  |
| C | -5.024088 | 0.126400  | 0.559226  |
| C | -3.517679 | 0.135629  | 0.369535  |
| C | -3.069553 | -0.920289 | -0.692036 |
| C | -3.694529 | -2.290336 | -0.338265 |
| C | -2.931464 | 1.533547  | 0.109119  |
| C | -1.527748 | 1.510806  | -0.543960 |
| C | -0.759835 | 0.243006  | -0.222762 |
| C | -1.535271 | -1.051772 | -0.538954 |
| C | 0.668621  | 0.113311  | -0.807604 |
| C | 0.731005  | -1.367899 | -1.253196 |
| C | -0.714605 | -1.679232 | -1.672728 |
| C | -0.807602 | 2.819292  | -0.227747 |
| C | 0.176904  | 2.886823  | 0.924045  |
| C | 1.423605  | 1.987067  | 0.830473  |
| C | 1.112353  | 0.484246  | 0.659651  |
| C | -3.523661 | -0.519069 | -2.105131 |
| C | 1.067318  | 1.010788  | -1.975970 |
| C | -5.838390 | 1.169513  | 0.389572  |
| O | -6.954674 | -1.289102 | 1.157688  |
| O | -1.081281 | 3.816455  | -0.870760 |
| C | 2.095906  | -0.404534 | 1.442700  |
| C | 3.573763  | -0.171825 | 1.095371  |
| C | 1.870855  | -0.251478 | 2.953893  |
| C | 3.995651  | -0.657357 | -0.292252 |
| C | 5.449710  | -0.330940 | -0.684341 |



|   |           |           |           |
|---|-----------|-----------|-----------|
| C | 5.621953  | 1.181146  | -0.891256 |
| C | 6.498520  | -0.906699 | 0.294427  |
| C | 6.305117  | -2.409582 | 0.525583  |
| C | 7.929671  | -0.640737 | -0.187024 |
| H | -3.084652 | -0.220541 | 1.318288  |
| H | -1.661050 | 1.531294  | -1.629779 |
| H | -1.370024 | -1.670749 | 0.351860  |
| O | -0.240823 | 0.231674  | 1.127338  |
| H | -5.739379 | -1.988767 | -1.047491 |
| H | -5.569596 | -3.242712 | 0.179353  |
| H | -5.038910 | -1.543144 | 1.879256  |
| H | -3.439378 | -3.015850 | -1.119398 |
| H | -3.230775 | -2.657579 | 0.587411  |
| H | -2.899845 | 2.074590  | 1.061140  |
| H | -3.576696 | 2.113539  | -0.554390 |
| H | 1.456939  | -1.522081 | -2.057141 |
| H | 1.012622  | -2.032919 | -0.432572 |
| H | -0.900354 | -2.750435 | -1.795184 |
| H | -0.942383 | -1.195709 | -2.630880 |
| H | -0.370554 | 2.605216  | 1.830638  |
| H | 0.483639  | 3.931434  | 1.016163  |
| H | 1.978152  | 2.142342  | 1.759952  |
| H | 2.085851  | 2.325732  | 0.026811  |
| H | -4.594361 | -0.297188 | -2.119885 |
| H | -3.341887 | -1.332830 | -2.814486 |
| H | -3.009242 | 0.366318  | -2.484770 |
| H | 0.883805  | 2.073981  | -1.813132 |
| H | 0.506547  | 0.723331  | -2.871988 |
| H | 2.130473  | 0.895481  | -2.208394 |
| H | -5.480277 | 2.154151  | 0.112829  |
| H | -6.911029 | 1.058031  | 0.509268  |
| H | -7.179090 | -0.725740 | 1.904208  |
| H | 1.852080  | -1.444972 | 1.199888  |
| H | 4.172136  | -0.694371 | 1.851777  |
| H | 3.813829  | 0.892054  | 1.214663  |
| H | 2.430707  | -1.023769 | 3.490672  |
| H | 0.813319  | -0.356444 | 3.205696  |
| H | 2.219925  | 0.718057  | 3.326493  |
| H | 3.347364  | -0.209840 | -1.050444 |
| H | 3.821467  | -1.738021 | -0.359381 |
| H | 5.623779  | -0.817769 | -1.656591 |
| H | 5.656639  | 1.715408  | 0.065175  |
| H | 6.541487  | 1.416880  | -1.432801 |
| H | 4.787677  | 1.590955  | -1.471132 |
| H | 6.374611  | -0.395479 | 1.260256  |
| H | 7.096031  | -2.806129 | 1.170159  |
| H | 5.347848  | -2.637968 | 1.003013  |
| H | 6.344913  | -2.954808 | -0.425640 |
| H | 8.657060  | -1.085991 | 0.499410  |
| H | 8.152878  | 0.427282  | -0.253547 |
| H | 8.092435  | -1.082793 | -1.178117 |

ωB97XD energy = -1358.17872217 a.u.

Swinhoeisterol F (**10**), Conf. R

|   |          |           |           |
|---|----------|-----------|-----------|
| C | 4.242446 | -2.902568 | 0.203986  |
| C | 4.721863 | -2.142987 | -1.028596 |

|   |           |           |           |
|---|-----------|-----------|-----------|
| C | 4.608052  | -0.648544 | -0.782310 |
| C | 3.187254  | -0.209976 | -0.474774 |
| C | 2.601810  | -0.985742 | 0.749734  |
| C | 2.805403  | -2.503584 | 0.533208  |
| C | 3.022839  | 1.313628  | -0.347804 |
| C | 1.739719  | 1.744355  | 0.403792  |
| C | 0.637672  | 0.705979  | 0.316485  |
| C | 1.078818  | -0.709334 | 0.739169  |
| C | -0.696296 | 1.036257  | 1.031366  |
| C | -1.094530 | -0.317865 | 1.669344  |
| C | 0.257566  | -0.964449 | 2.009823  |
| C | 1.356200  | 3.157973  | -0.028653 |
| C | 0.303579  | 3.364274  | -1.100741 |
| C | -1.115125 | 2.861828  | -0.774562 |
| C | -1.189970 | 1.360012  | -0.424329 |
| C | 3.302700  | -0.576665 | 2.055921  |
| C | -0.742420 | 2.125712  | 2.097647  |
| C | 5.678665  | 0.146787  | -0.820210 |
| O | 6.026350  | -2.590636 | -1.333718 |
| O | 1.945872  | 4.106412  | 0.456417  |
| C | -2.483118 | 0.703111  | -0.912401 |
| C | -3.701191 | 1.319624  | -0.208568 |
| C | -2.604634 | 0.715382  | -2.439529 |
| C | -4.997942 | 0.505374  | -0.304121 |
| C | -4.926030 | -0.874488 | 0.391621  |
| C | -6.165235 | -1.110437 | 1.263354  |
| C | -4.665282 | -2.032135 | -0.606151 |
| C | -4.076615 | -3.261460 | 0.092162  |
| C | -5.903433 | -2.415912 | -1.422857 |
| H | 2.571965  | -0.529422 | -1.331440 |
| H | 1.985306  | 1.846106  | 1.465318  |
| H | 0.658205  | -1.352677 | -0.043915 |
| O | -0.024445 | 0.690910  | -0.973956 |
| H | 4.924653  | -2.687445 | 1.033842  |
| H | 4.303169  | -3.977184 | 0.006130  |
| H | 4.041478  | -2.394109 | -1.861461 |
| H | 2.459703  | -3.043862 | 1.422258  |
| H | 2.161988  | -2.828413 | -0.295914 |
| H | 3.038149  | 1.747276  | -1.353713 |
| H | 3.865083  | 1.753991  | 0.190457  |
| H | -1.742571 | -0.185193 | 2.541136  |
| H | -1.624650 | -0.967914 | 0.968669  |
| H | 0.169151  | -2.026946 | 2.255618  |
| H | 0.711713  | -0.463554 | 2.873938  |
| H | 0.648263  | 2.838609  | -1.998062 |
| H | 0.274374  | 4.435512  | -1.313661 |
| H | -1.721345 | 3.059455  | -1.662605 |
| H | -1.558018 | 3.457228  | 0.029993  |
| H | 2.992833  | -1.229108 | 2.878505  |
| H | 3.088639  | 0.451916  | 2.354030  |
| H | 4.388185  | -0.661072 | 1.954216  |
| H | -0.272364 | 3.066208  | 1.804756  |
| H | -0.235847 | 1.784700  | 3.006797  |
| H | -1.782493 | 2.344091  | 2.363209  |
| H | 5.621551  | 1.215632  | -0.651291 |
| H | 6.665442  | -0.264419 | -1.006074 |

|   |           |           |           |
|---|-----------|-----------|-----------|
| H | 6.304313  | -2.195451 | -2.165368 |
| H | -2.406949 | -0.347427 | -0.620519 |
| H | -3.876920 | 2.324572  | -0.614916 |
| H | -3.468846 | 1.455060  | 0.856877  |
| H | -2.839166 | 1.710968  | -2.830998 |
| H | -3.404424 | 0.044673  | -2.767679 |
| H | -1.673116 | 0.374051  | -2.899563 |
| H | -5.285690 | 0.383799  | -1.355942 |
| H | -5.796752 | 1.101608  | 0.152416  |
| H | -4.060889 | -0.850909 | 1.070355  |
| H | -6.152604 | -2.095302 | 1.740952  |
| H | -6.217839 | -0.358537 | 2.057420  |
| H | -7.086840 | -1.032321 | 0.676438  |
| H | -3.909512 | -1.676664 | -1.317614 |
| H | -3.844523 | -4.048548 | -0.632699 |
| H | -3.151352 | -3.010528 | 0.623148  |
| H | -4.777703 | -3.682495 | 0.821621  |
| H | -5.635064 | -3.123728 | -2.213438 |
| H | -6.366031 | -1.544617 | -1.898632 |
| H | -6.661485 | -2.896004 | -0.794559 |

ωB97XD energy = -1358.17870532 a.u.

Swinhoeisterol F (**10**), Conf. S

|   |           |           |           |
|---|-----------|-----------|-----------|
| C | 4.949238  | -2.678777 | 0.086940  |
| C | 5.386898  | -1.759193 | -1.047999 |
| C | 5.064521  | -0.317592 | -0.693075 |
| C | 3.586540  | -0.088397 | -0.428406 |
| C | 3.052153  | -1.038420 | 0.691331  |
| C | 3.457944  | -2.492275 | 0.357276  |
| C | 3.225144  | 1.385246  | -0.180471 |
| C | 1.862923  | 1.584239  | 0.527658  |
| C | 0.908658  | 0.428467  | 0.294937  |
| C | 1.508524  | -0.953690 | 0.622132  |
| C | -0.486938 | 0.525333  | 0.960550  |
| C | -0.736011 | -0.917155 | 1.466898  |
| C | 0.673557  | -1.416279 | 1.824268  |
| C | 1.320298  | 2.971374  | 0.189494  |
| C | 0.293890  | 3.137627  | -0.914617 |
| C | -1.061168 | 2.435787  | -0.705129 |
| C | -0.954351 | 0.910726  | -0.487233 |
| C | 3.635480  | -0.663303 | 2.064017  |
| C | -0.724400 | 1.505077  | 2.104883  |
| C | 6.019656  | 0.610736  | -0.616724 |
| O | 6.753071  | -2.008442 | -1.306997 |
| O | 1.765630  | 3.940617  | 0.776795  |
| C | -2.125836 | 0.138920  | -1.100056 |
| C | -3.429279 | 0.449526  | -0.352856 |
| C | -2.240404 | 0.346470  | -2.614885 |
| C | -4.600396 | -0.435753 | -0.788014 |
| C | -5.802207 | -0.432564 | 0.171973  |
| C | -6.303586 | 0.995539  | 0.417229  |
| C | -6.936963 | -1.358718 | -0.330421 |
| C | -6.452878 | -2.790807 | -0.592974 |
| C | -8.123088 | -1.399441 | 0.641631  |
| H | 3.055260  | -0.400952 | -1.341784 |
| H | 2.045448  | 1.623600  | 1.606025  |

|   |           |           |           |
|---|-----------|-----------|-----------|
| H | 1.205849  | -1.573285 | -0.231504 |
| O | 0.311778  | 0.448534  | -1.027103 |
| H | 5.553225  | -2.454490 | 0.973164  |
| H | 5.157888  | -3.715865 | -0.193271 |
| H | 4.789942  | -2.021136 | -1.939716 |
| H | 3.137485  | -3.153267 | 1.171047  |
| H | 2.906331  | -2.812709 | -0.537229 |
| H | 3.234912  | 1.908352  | -1.142950 |
| H | 3.977795  | 1.872181  | 0.443678  |
| H | -1.428002 | -0.937526 | 2.314297  |
| H | -1.153425 | -1.565168 | 0.691867  |
| H | 0.715323  | -2.497954 | 1.983533  |
| H | 1.022436  | -0.934861 | 2.746434  |
| H | 0.739807  | 2.737207  | -1.831844 |
| H | 0.136948  | 4.211148  | -1.042936 |
| H | -1.650744 | 2.636462  | -1.603228 |
| H | -1.607728 | 2.897756  | 0.122922  |
| H | 3.410121  | -1.438524 | 2.803349  |
| H | 3.243926  | 0.279811  | 2.451892  |
| H | 4.722690  | -0.559374 | 2.008057  |
| H | -0.362769 | 2.517650  | 1.917388  |
| H | -0.227741 | 1.150560  | 3.014347  |
| H | -1.796659 | 1.572502  | 2.319710  |
| H | 5.812533  | 1.646116  | -0.373320 |
| H | 7.059955  | 0.351415  | -0.783548 |
| H | 7.017195  | -1.512654 | -2.087663 |
| H | -1.899786 | -0.922888 | -0.953626 |
| H | -3.679260 | 1.508494  | -0.493772 |
| H | -3.263340 | 0.307776  | 0.724571  |
| H | -2.694779 | 1.310636  | -2.867647 |
| H | -2.867133 | -0.431523 | -3.059837 |
| H | -1.255229 | 0.291752  | -3.086876 |
| H | -4.221213 | -1.459288 | -0.886575 |
| H | -4.944966 | -0.135395 | -1.787658 |
| H | -5.454734 | -0.840130 | 1.135888  |
| H | -7.101557 | 1.026104  | 1.162513  |
| H | -5.503477 | 1.644140  | 0.783764  |
| H | -6.690561 | 1.433527  | -0.511655 |
| H | -7.297705 | -0.943532 | -1.284288 |
| H | -7.294877 | -3.437160 | -0.860394 |
| H | -5.728716 | -2.847246 | -1.409420 |
| H | -5.983652 | -3.211563 | 0.305357  |
| H | -8.876343 | -2.115274 | 0.297691  |
| H | -8.617552 | -0.430268 | 0.742248  |
| H | -7.794446 | -1.717050 | 1.639284  |

ωB97XD energy = -1358.17869127 a.u.

Swinhoeisterol F (**10**), Conf. T

|   |           |           |           |
|---|-----------|-----------|-----------|
| C | -5.153820 | -2.301363 | 0.058562  |
| C | -5.532240 | -1.191233 | 1.033372  |
| C | -5.012365 | 0.139803  | 0.518073  |
| C | -3.504031 | 0.153849  | 0.342943  |
| C | -3.032682 | -0.989934 | -0.612520 |
| C | -3.638956 | -2.329974 | -0.133473 |
| C | -2.936351 | 1.529853  | -0.043560 |
| C | -1.524246 | 1.468555  | -0.675859 |

|   |           |           |           |
|---|-----------|-----------|-----------|
| C | -0.741643 | 0.244552  | -0.239194 |
| C | -1.497324 | -1.083846 | -0.442182 |
| C | 0.691248  | 0.085237  | -0.805803 |
| C | 0.775918  | -1.428646 | -1.118064 |
| C | -0.663153 | -1.796981 | -1.514026 |
| C | -0.825535 | 2.810264  | -0.468277 |
| C | 0.145845  | 2.990954  | 0.683496  |
| C | 1.407468  | 2.107854  | 0.677556  |
| C | 1.122274  | 0.591699  | 0.627522  |
| C | -3.482581 | -0.730490 | -2.059513 |
| C | 1.072398  | 0.875900  | -2.054098 |
| C | -5.839762 | 1.148748  | 0.239735  |
| O | -6.930772 | -1.241445 | 1.225983  |
| O | -1.105153 | 3.743878  | -1.198046 |
| C | 2.115291  | -0.213370 | 1.485846  |
| C | 3.596259  | 0.066804  | 1.191245  |
| C | 1.827274  | -0.009141 | 2.979166  |
| C | 4.024286  | -0.141380 | -0.261165 |
| C | 5.544159  | -0.106339 | -0.507968 |
| C | 6.108249  | 1.287027  | -0.195848 |
| C | 6.322236  | -1.222865 | 0.226925  |
| C | 5.692088  | -2.604031 | 0.016341  |
| C | 7.794730  | -1.253883 | -0.199921 |
| H | -3.074232 | -0.104320 | 1.324160  |
| H | -1.646293 | 1.390374  | -1.760425 |
| H | -1.327433 | -1.619092 | 0.500443  |
| O | -0.229470 | 0.357753  | 1.108197  |
| H | -5.679499 | -2.131218 | -0.887447 |
| H | -5.505009 | -3.258527 | 0.456411  |
| H | -5.021291 | -1.397230 | 1.990516  |
| H | -3.364332 | -3.122052 | -0.839787 |
| H | -3.178052 | -2.597102 | 0.827086  |
| H | -2.926551 | 2.161188  | 0.851857  |
| H | -3.582064 | 2.031364  | -0.767706 |
| H | 1.507178  | -1.643488 | -1.903049 |
| H | 1.059478  | -2.016152 | -0.240712 |
| H | -0.832984 | -2.877453 | -1.541331 |
| H | -0.893501 | -1.403475 | -2.511766 |
| H | -0.406228 | 2.775296  | 1.605215  |
| H | 0.433964  | 4.044890  | 0.690743  |
| H | 1.947368  | 2.345821  | 1.598445  |
| H | 2.075257  | 2.392281  | -0.142199 |
| H | -3.279395 | -1.604053 | -2.687315 |
| H | -2.980544 | 0.124982  | -2.516665 |
| H | -4.556815 | -0.530925 | -2.103139 |
| H | 0.932270  | 1.954589  | -1.966874 |
| H | 0.461564  | 0.543486  | -2.900604 |
| H | 2.117211  | 0.696625  | -2.321191 |
| H | -5.492838 | 2.107371  | -0.127680 |
| H | -6.912047 | 1.031746  | 0.357081  |
| H | -7.172205 | -0.614890 | 1.914630  |
| H | 1.933331  | -1.273316 | 1.277619  |
| H | 4.178396  | -0.595998 | 1.843198  |
| H | 3.846488  | 1.087566  | 1.507682  |
| H | 2.462258  | -0.672867 | 3.574534  |
| H | 0.783256  | -0.228656 | 3.210936  |

|   |          |           |           |
|---|----------|-----------|-----------|
| H | 2.039325 | 1.017036  | 3.299915  |
| H | 3.576991 | 0.643809  | -0.879569 |
| H | 3.610189 | -1.086218 | -0.631958 |
| H | 5.682901 | -0.286459 | -1.585393 |
| H | 6.176461 | 1.455198  | 0.885190  |
| H | 7.107149 | 1.427698  | -0.616525 |
| H | 5.464658 | 2.068532  | -0.614315 |
| H | 6.298389 | -1.001597 | 1.303754  |
| H | 6.319305 | -3.385953 | 0.456063  |
| H | 4.701487 | -2.682159 | 0.474409  |
| H | 5.585919 | -2.823633 | -1.053420 |
| H | 8.326358 | -2.066862 | 0.305147  |
| H | 8.315298 | -0.323012 | 0.040048  |
| H | 7.881814 | -1.420362 | -1.280941 |

ωB97XD energy = -1358.17866918 a.u.

Swinhoeisterol F (**10**), Conf. U

|   |           |           |           |
|---|-----------|-----------|-----------|
| C | -4.967629 | -2.471250 | 0.089306  |
| C | -5.426532 | -1.377151 | 1.047554  |
| C | -4.985174 | -0.021267 | 0.523725  |
| C | -3.479253 | 0.086296  | 0.358142  |
| C | -2.927537 | -1.037074 | -0.578192 |
| C | -3.451934 | -2.406082 | -0.086041 |
| C | -2.999628 | 1.490398  | -0.046323 |
| C | -1.580443 | 1.512524  | -0.664745 |
| C | -0.725379 | 0.347246  | -0.205466 |
| C | -1.390614 | -1.030283 | -0.395096 |
| C | 0.717486  | 0.272324  | -0.764088 |
| C | 0.906468  | -1.237332 | -1.054275 |
| C | -0.503845 | -1.701625 | -1.452610 |
| C | -0.968857 | 2.898929  | -0.473544 |
| C | -0.013567 | 3.157224  | 0.676619  |
| C | 1.300131  | 2.353717  | 0.677728  |
| C | 1.104422  | 0.822641  | 0.654096  |
| C | -3.381516 | -0.825219 | -2.031848 |
| C | 1.098357  | 1.070232  | -2.007050 |
| C | -5.870849 | 0.932914  | 0.231976  |
| O | -6.821336 | -1.512947 | 1.225264  |
| O | -1.304305 | 3.801848  | -1.218391 |
| C | 2.179630  | 0.077035  | 1.449014  |
| C | 3.536784  | 0.218466  | 0.748259  |
| C | 2.204419  | 0.480212  | 2.928087  |
| C | 4.604843  | -0.739714 | 1.271824  |
| C | 6.004067  | -0.601697 | 0.646581  |
| C | 6.973878  | -1.535300 | 1.383206  |
| C | 6.089038  | -0.840663 | -0.887611 |
| C | 5.243290  | -2.025526 | -1.367473 |
| C | 5.804756  | 0.414498  | -1.723310 |
| H | -3.041050 | -0.129234 | 1.345829  |
| H | -1.684718 | 1.410373  | -1.749406 |
| H | -1.194357 | -1.541836 | 0.555583  |
| O | -0.225386 | 0.512613  | 1.146507  |
| H | -5.491806 | -2.344261 | -0.864321 |
| H | -5.261687 | -3.444505 | 0.494134  |
| H | -4.915182 | -1.541065 | 2.012631  |
| H | -3.119805 | -3.189053 | -0.777735 |

|   |           |           |           |
|---|-----------|-----------|-----------|
| H | -2.986025 | -2.629833 | 0.883276  |
| H | -3.039831 | 2.135842  | 0.838078  |
| H | -3.670596 | 1.935349  | -0.784444 |
| H | 1.652435  | -1.411499 | -1.836122 |
| H | 1.226531  | -1.795302 | -0.170601 |
| H | -0.606457 | -2.790844 | -1.468177 |
| H | -0.752010 | -1.334344 | -2.456347 |
| H | -0.551778 | 2.918953  | 1.600963  |
| H | 0.207837  | 4.227081  | 0.668602  |
| H | 1.831811  | 2.639060  | 1.589022  |
| H | 1.941519  | 2.663267  | -0.153433 |
| H | -3.126873 | -1.696045 | -2.644633 |
| H | -2.923834 | 0.049214  | -2.499722 |
| H | -4.464784 | -0.685122 | -2.084566 |
| H | 0.619589  | 0.638892  | -2.892671 |
| H | 2.181578  | 1.021125  | -2.164880 |
| H | 0.818469  | 2.124647  | -1.973327 |
| H | -5.580456 | 1.908227  | -0.140581 |
| H | -6.934984 | 0.752948  | 0.343848  |
| H | -7.109268 | -0.897503 | 1.905964  |
| H | 1.898515  | -0.981506 | 1.424731  |
| H | 3.896549  | 1.253313  | 0.837620  |
| H | 3.381946  | 0.035789  | -0.319543 |
| H | 2.702569  | 1.442828  | 3.086529  |
| H | 2.741870  | -0.264003 | 3.522107  |
| H | 1.187170  | 0.548351  | 3.324713  |
| H | 4.250074  | -1.772605 | 1.146738  |
| H | 4.716811  | -0.590118 | 2.352712  |
| H | 6.341952  | 0.429214  | 0.828748  |
| H | 8.004075  | -1.382893 | 1.045865  |
| H | 6.945827  | -1.363313 | 2.464198  |
| H | 6.718261  | -2.587530 | 1.210434  |
| H | 7.138149  | -1.099662 | -1.087458 |
| H | 5.449210  | -2.238745 | -2.421397 |
| H | 5.457128  | -2.935979 | -0.798037 |
| H | 4.170393  | -1.821105 | -1.278273 |
| H | 6.007708  | 0.222230  | -2.782447 |
| H | 6.441633  | 1.247711  | -1.407638 |
| H | 4.765241  | 0.744545  | -1.644270 |

ωB97XD energy = -1358.17864465 a.u.

|   |           |           |           |
|---|-----------|-----------|-----------|
| C | 0.078317  | 2.525689  | -0.805193 |
| C | 0.241257  | -3.427243 | 0.425064  |
| C | -4.319773 | -0.047283 | 1.737149  |
| O | -1.804545 | -3.222441 | -1.826187 |
| O | -0.997442 | 4.695860  | -0.618445 |
| C | 1.160734  | 2.894371  | -1.485988 |
| O | -1.407251 | -0.076499 | -2.064356 |
| O | 1.610689  | -1.064078 | -0.201487 |
| C | 2.744340  | -0.813396 | -0.888903 |
| O | 2.770518  | -0.675850 | -2.090795 |
| C | 3.947739  | -0.781186 | 0.020377  |
| C | 3.752031  | -0.061789 | 1.364091  |
| C | 4.998916  | -0.240902 | 2.232949  |
| C | 3.436521  | 1.421034  | 1.157954  |
| H | -2.641958 | -0.625816 | 2.953473  |
| H | -2.545104 | 1.848502  | 2.214103  |
| H | -1.038163 | 0.939331  | 2.261936  |
| H | -2.500558 | 0.960435  | -0.380402 |
| H | 0.339013  | 0.882391  | 0.528065  |
| H | 0.577430  | 0.451585  | -2.096598 |
| H | 0.636713  | -1.860341 | -1.840555 |
| H | -3.900420 | -2.019785 | -0.259826 |
| H | 0.541002  | -4.030613 | -0.435835 |
| H | 1.122413  | -3.156163 | 1.008659  |
| H | -0.431362 | -4.023153 | 1.047104  |
| H | -4.536881 | 0.364270  | 0.746400  |
| H | -4.689837 | 0.661379  | 2.482187  |
| H | -4.878172 | -0.980835 | 1.850310  |
| H | 1.283636  | 3.935834  | -1.766924 |
| H | 1.932962  | 2.189464  | -1.781875 |
| H | -1.281471 | -0.581315 | -2.874051 |
| H | 4.217869  | -1.829883 | 0.201730  |
| H | 4.766935  | -0.331509 | -0.548386 |
| H | 2.902702  | -0.529228 | 1.875555  |
| H | 5.210632  | -1.299262 | 2.417108  |
| H | 5.878740  | 0.200758  | 1.750373  |
| H | 4.869543  | 0.250033  | 3.202330  |
| H | 3.291441  | 1.925526  | 2.118046  |
| H | 2.526166  | 1.568355  | 0.569436  |
| H | 4.258163  | 1.925195  | 0.635411  |

ωB97XD energy = -1304.05041576 a.u.

Lobatolide A (**11**), Conf. A

|   |           |           |           |
|---|-----------|-----------|-----------|
| C | -2.274134 | -1.291277 | 0.990475  |
| C | -2.820220 | -0.269822 | 1.931070  |
| C | -1.995784 | 1.029702  | 1.741750  |
| C | -1.756580 | 1.422128  | 0.273013  |
| C | -0.324758 | 1.163015  | -0.296585 |
| C | -0.175139 | 0.077452  | -1.394750 |
| C | 0.399752  | -1.286681 | -0.935915 |
| C | -0.482303 | -2.180862 | -0.062581 |
| O | -0.930504 | -1.413815 | 1.064219  |
| C | -1.781689 | -2.571330 | -0.797223 |
| C | -2.851538 | -1.993933 | -0.009290 |
| O | -1.980394 | 2.847068  | 0.178944  |
| C | -0.977693 | 3.506129  | -0.432950 |

Lobatolide A (**11**), Conf. B

|   |           |           |           |
|---|-----------|-----------|-----------|
| C | 1.675904  | -2.037947 | -0.758151 |
| C | 2.673048  | -1.518162 | -1.739829 |
| C | 2.571162  | 0.029814  | -1.757272 |
| C | 2.456623  | 0.674734  | -0.365273 |
| C | 1.030390  | 1.150772  | 0.057744  |
| C | 0.385250  | 0.441997  | 1.280591  |
| C | -0.737576 | -0.568435 | 0.946473  |
| C | -0.357372 | -1.858174 | 0.215990  |
| O | 0.435561  | -1.531440 | -0.935606 |
| C | 0.580020  | -2.719009 | 1.088763  |
| C | 1.821257  | -2.801024 | 0.348062  |
| O | 3.296807  | 1.850266  | -0.369268 |
| C | 2.649348  | 2.971262  | 0.001950  |

|   |           |           |           |
|---|-----------|-----------|-----------|
| C | 1.231912  | 2.625423  | 0.300172  |
| C | -1.570487 | -2.668706 | -0.214944 |
| C | 4.089356  | -2.004166 | -1.432792 |
| O | 0.261313  | -3.174149 | 2.172411  |
| O | 3.187605  | 4.046840  | 0.061164  |
| C | 0.357301  | 3.543042  | 0.703579  |
| O | 1.397352  | -0.140661 | 2.070663  |
| O | -1.712514 | 0.112452  | 0.147733  |
| C | -2.684683 | 0.802068  | 0.786647  |
| O | -2.735807 | 0.909768  | 1.989708  |
| C | -3.655289 | 1.403752  | -0.196741 |
| C | -4.246186 | 0.384303  | -1.186562 |
| C | -4.977569 | -0.740934 | -0.450403 |
| C | -5.175931 | 1.092748  | -2.173216 |
| H | 2.381313  | -1.878412 | -2.734360 |
| H | 3.479524  | 0.419187  | -2.224775 |
| H | 1.728691  | 0.340975  | -2.381638 |
| H | 2.871191  | 0.018461  | 0.402931  |
| H | 0.345755  | 1.024721  | -0.785076 |
| H | -0.127345 | 1.221569  | 1.857386  |
| H | -1.204883 | -0.870130 | 1.891252  |
| H | 2.725962  | -3.278250 | 0.690637  |
| H | -1.242833 | -3.578466 | -0.724092 |
| H | -2.145274 | -2.955172 | 0.669930  |
| H | -2.201120 | -2.086720 | -0.888786 |
| H | 4.445245  | -1.613953 | -0.473748 |
| H | 4.777405  | -1.660509 | -2.209112 |
| H | 4.139196  | -3.096209 | -1.396967 |
| H | 0.678174  | 4.573059  | 0.824766  |
| H | -0.677908 | 3.300140  | 0.927451  |
| H | 1.031065  | -0.429178 | 2.912691  |
| H | -4.446966 | 1.883903  | 0.385273  |
| H | -3.122652 | 2.186714  | -0.750820 |
| H | -3.412744 | -0.051953 | -1.750075 |
| H | -5.381076 | -1.469431 | -1.160491 |
| H | -4.315414 | -1.279302 | 0.235842  |
| H | -5.813225 | -0.342306 | 0.136067  |
| H | -4.652890 | 1.884739  | -2.719201 |
| H | -6.026510 | 1.547111  | -1.651800 |
| H | -5.574094 | 0.384648  | -2.906456 |

ωB97XD energy = -1304.05008165 a.u.

Lobatolide A (**11**), Conf. C

|   |           |           |           |
|---|-----------|-----------|-----------|
| C | 2.606567  | -0.962886 | -0.926744 |
| C | 3.090464  | 0.176457  | -1.760183 |
| C | 2.078439  | 1.340644  | -1.603677 |
| C | 1.640057  | 1.613559  | -0.154477 |
| C | 0.212429  | 1.120510  | 0.245905  |
| C | 0.120166  | -0.026190 | 1.286862  |
| C | -0.206354 | -1.434079 | 0.727990  |
| C | 0.866000  | -2.145700 | -0.099566 |
| O | 1.305954  | -1.260329 | -1.139915 |
| C | 2.134797  | -2.402602 | 0.740485  |
| C | 3.181814  | -1.641066 | 0.091053  |
| O | 1.640244  | 3.048231  | 0.021717  |
| C | 0.492542  | 3.522417  | 0.542627  |

|   |           |           |           |
|---|-----------|-----------|-----------|
| C | -0.441927 | 2.382772  | 0.751582  |
| C | 0.370614  | -3.446032 | -0.714799 |
| C | 4.518150  | 0.589162  | -1.403463 |
| O | 2.152936  | -3.102982 | 1.736644  |
| O | 0.316045  | 4.690414  | 0.777240  |
| C | -1.637218 | 2.556522  | 1.309985  |
| O | 1.296216  | -0.038188 | 2.066724  |
| O | -1.383413 | -1.357707 | -0.090889 |
| C | -2.582204 | -1.308698 | 0.527135  |
| O | -2.702813 | -1.230163 | 1.729405  |
| C | -3.730735 | -1.347578 | -0.446647 |
| C | -4.369937 | 0.040268  | -0.665717 |
| C | -3.449457 | 0.962474  | -1.467945 |
| C | -5.722990 | -0.119322 | -1.362247 |
| H | 3.063630  | -0.141583 | -2.810051 |
| H | 2.554852  | 2.250445  | -1.978592 |
| H | 1.200208  | 1.154670  | -2.228172 |
| H | 2.373465  | 1.226920  | 0.557026  |
| H | -0.311323 | 0.784109  | -0.654682 |
| H | -0.737760 | 0.205989  | 1.925792  |
| H | -0.421891 | -2.081684 | 1.586886  |
| H | 4.195201  | -1.538097 | 0.446254  |
| H | 0.075984  | -4.134346 | 0.081536  |
| H | -0.479680 | -3.258669 | -1.371994 |
| H | 1.176193  | -3.908322 | -1.290840 |
| H | 4.578370  | 0.977501  | -0.381769 |
| H | 4.857199  | 1.376614  | -2.081147 |
| H | 5.211621  | -0.252173 | -1.490315 |
| H | -1.942157 | 3.553062  | 1.614610  |
| H | -2.326856 | 1.734535  | 1.482923  |
| H | 1.171675  | -0.596888 | 2.840410  |
| H | -3.396414 | -1.758819 | -1.404027 |
| H | -4.474230 | -2.023975 | -0.014794 |
| H | -4.543577 | 0.484096  | 0.323155  |
| H | -2.483865 | 1.109295  | -0.977214 |
| H | -3.260385 | 0.544280  | -2.463541 |
| H | -3.905387 | 1.948789  | -1.595830 |
| H | -5.601680 | -0.594017 | -2.343256 |
| H | -6.195166 | 0.855223  | -1.519260 |
| H | -6.406680 | -0.734964 | -0.769482 |

ωB97XD energy = -1304.04997135 a.u.

Lobatolide A (**11**), Conf. D

|   |           |           |           |
|---|-----------|-----------|-----------|
| C | 2.688047  | -1.267877 | -0.737064 |
| C | 3.460365  | -0.257238 | -1.518810 |
| C | 2.663174  | 1.073876  | -1.513785 |
| C | 2.063579  | 1.449832  | -0.148132 |
| C | 0.537558  | 1.170713  | 0.027472  |
| C | 0.132735  | 0.141731  | 1.120311  |
| C | -0.336085 | -1.233136 | 0.588091  |
| C | 0.688319  | -2.125354 | -0.115214 |
| O | 1.391186  | -1.358768 | -1.106133 |
| C | 1.788972  | -2.557026 | 0.877099  |
| C | 3.016026  | -1.994711 | 0.354654  |
| O | 2.242888  | 2.873458  | 0.023135  |
| C | 1.094147  | 3.529442  | 0.277513  |

|   |           |           |           |
|---|-----------|-----------|-----------|
| C | -0.021225 | 2.543306  | 0.301488  |
| C | 0.053564  | -3.342231 | -0.770322 |
| C | 4.881696  | -0.083442 | -0.983077 |
| O | 1.571855  | -3.213802 | 1.879383  |
| O | 1.045958  | 4.720772  | 0.446382  |
| C | -1.279884 | 2.912003  | 0.523547  |
| O | 1.178148  | 0.015537  | 2.057423  |
| O | -1.419747 | -0.987022 | -0.317841 |
| C | -2.667167 | -0.933513 | 0.203758  |
| O | -2.896625 | -1.080815 | 1.381305  |
| C | -3.691710 | -0.696308 | -0.876908 |
| C | -5.038799 | -0.180070 | -0.360902 |
| C | -4.901308 | 1.210700  | 0.263624  |
| C | -6.059618 | -0.169226 | -1.501132 |
| H | 3.512074  | -0.606824 | -2.557564 |
| H | 3.350500  | 1.873720  | -1.802305 |
| H | 1.873438  | 1.039523  | -2.269622 |
| H | 2.622984  | 0.982565  | 0.664989  |
| H | 0.127757  | 0.809189  | -0.918832 |
| H | -0.757685 | 0.549067  | 1.616171  |
| H | -0.713452 | -1.809940 | 1.440078  |
| H | 3.982255  | -2.048947 | 0.830925  |
| H | -0.441482 | -3.946466 | -0.005640 |
| H | -0.674200 | -3.034310 | -1.522665 |
| H | 0.827422  | -3.949839 | -1.245925 |
| H | 4.876555  | 0.331805  | 0.029770  |
| H | 5.439877  | 0.603472  | -1.623944 |
| H | 5.419324  | -1.035562 | -0.960407 |
| H | -1.510211 | 3.957971  | 0.700785  |
| H | -2.097232 | 2.196603  | 0.538016  |
| H | 0.879222  | -0.497204 | 2.815203  |
| H | -3.265076 | -0.009635 | -1.617567 |
| H | -3.822587 | -1.656770 | -1.392867 |
| H | -5.385666 | -0.871876 | 0.415230  |
| H | -4.221739 | 1.197503  | 1.120655  |
| H | -4.526019 | 1.932011  | -0.473536 |
| H | -5.870528 | 1.574448  | 0.618140  |
| H | -5.743389 | 0.509982  | -2.302022 |
| H | -7.035891 | 0.171528  | -1.143295 |
| H | -6.189859 | -1.165713 | -1.936264 |

ωB97XD energy = -1304.04990859 a.u.

Lobatolide A (11), Conf. E

|   |           |           |           |
|---|-----------|-----------|-----------|
| C | -2.695533 | -0.903331 | 0.843464  |
| C | -3.202048 | 0.240245  | 1.657141  |
| C | -2.153191 | 1.378486  | 1.560019  |
| C | -1.627126 | 1.630947  | 0.135739  |
| C | -0.176350 | 1.135774  | -0.169504 |
| C | -0.023512 | -0.009551 | -1.207031 |
| C | 0.207692  | -1.429019 | -0.633276 |
| C | -0.935652 | -2.118597 | 0.111143  |
| O | -1.420452 | -1.238604 | 1.136159  |
| C | -2.150680 | -2.324526 | -0.817156 |
| C | -3.218599 | -1.546813 | -0.224388 |
| O | -1.624998 | 3.061786  | -0.066663 |
| C | -0.444684 | 3.536406  | -0.505430 |

|   |           |           |           |
|---|-----------|-----------|-----------|
| C | 0.510630  | 2.400431  | -0.625255 |
| C | -0.513243 | -3.440350 | 0.734526  |
| C | -4.595059 | 0.691509  | 1.219614  |
| O | -2.118055 | -2.999488 | -1.830599 |
| O | -0.256440 | 4.702105  | -0.742248 |
| C | 1.747732  | 2.584675  | -1.077624 |
| O | -1.113187 | 0.033735  | -2.098562 |
| O | 1.325778  | -1.346282 | 0.256245  |
| C | 2.559215  | -1.599511 | -0.243144 |
| O | 2.756317  | -1.914323 | -1.393543 |
| C | 3.609906  | -1.375282 | 0.810012  |
| C | 4.017079  | 0.114699  | 0.884086  |
| C | 4.828480  | 0.374168  | 2.154376  |
| C | 4.798789  | 0.541754  | -0.360616 |
| H | -3.243372 | -0.083003 | 2.704745  |
| H | -2.626404 | 2.301759  | 1.904685  |
| H | -1.318568 | 1.170484  | 2.235213  |
| H | -2.315268 | 1.230156  | -0.611978 |
| H | 0.292038  | 0.792452  | 0.757929  |
| H | 0.908087  | 0.197266  | -1.751468 |
| H | 0.471003  | -2.083809 | -1.472253 |
| H | -4.203165 | -1.410588 | -0.643593 |
| H | -0.176658 | -4.121211 | -0.051476 |
| H | 0.291351  | -3.283593 | 1.454861  |
| H | -1.366187 | -3.894881 | 1.244737  |
| H | -4.583244 | 1.089012  | 0.199705  |
| H | -4.953462 | 1.482914  | 1.882551  |
| H | -5.313685 | -0.132097 | 1.257710  |
| H | 2.068182  | 3.582478  | -1.361493 |
| H | 2.458698  | 1.771030  | -1.182016 |
| H | -0.978562 | -0.591726 | -2.818068 |
| H | 3.212883  | -1.696147 | 1.777219  |
| H | 4.481140  | -1.987317 | 0.559550  |
| H | 3.094793  | 0.708908  | 0.945441  |
| H | 4.257064  | 0.122689  | 3.053508  |
| H | 5.747369  | -0.223948 | 2.157233  |
| H | 5.115762  | 1.427987  | 2.220634  |
| H | 4.998722  | 1.617707  | -0.339508 |
| H | 4.264668  | 0.308538  | -1.287003 |
| H | 5.762025  | 0.020829  | -0.403364 |

ωB97XD energy = -1304.04990489 a.u.

Lobatolide A (11), Conf. F

|   |           |           |           |
|---|-----------|-----------|-----------|
| C | -2.540911 | -1.208125 | 0.810649  |
| C | -3.235428 | -0.170081 | 1.627498  |
| C | -2.392456 | 1.130232  | 1.551638  |
| C | -1.884166 | 1.467381  | 0.138611  |
| C | -0.368367 | 1.200280  | -0.132475 |
| C | -0.023489 | 0.120130  | -1.195959 |
| C | 0.423911  | -1.255169 | -0.647648 |
| C | -0.603054 | -2.121815 | 0.086134  |
| O | -1.230963 | -1.337327 | 1.112262  |
| C | -1.761769 | -2.506637 | -0.856545 |
| C | -2.945222 | -1.918559 | -0.266530 |
| O | -2.097176 | 2.881533  | -0.067450 |
| C | -0.985003 | 3.538708  | -0.445810 |

|   |           |           |           |
|---|-----------|-----------|-----------|
| C | 0.139130  | 2.565405  | -0.525795 |
| C | 0.018453  | -3.364125 | 0.705209  |
| C | -4.680632 | 0.045811  | 1.179621  |
| O | -1.612626 | -3.146244 | -1.882727 |
| O | -0.968463 | 4.722512  | -0.666275 |
| C | 1.361114  | 2.945356  | -0.888579 |
| O | -1.095919 | 0.012929  | -2.102087 |
| O | 1.524285  | -0.977412 | 0.222129  |
| C | 2.732378  | -1.526298 | -0.058194 |
| O | 2.921515  | -2.283365 | -0.979258 |
| C | 3.770064  | -1.033565 | 0.915282  |
| C | 4.032328  | 0.479768  | 0.779266  |
| C | 5.032685  | 0.935881  | 1.842257  |
| C | 4.525210  | 0.831846  | -0.626409 |
| H | -3.231511 | -0.506625 | 2.671774  |
| H | -3.024942 | 1.959214  | 1.880433  |
| H | -1.551382 | 1.069547  | 2.247801  |
| H | -2.487428 | 0.966071  | -0.621224 |
| H | 0.118339  | 0.897733  | 0.798512  |
| H | 0.870953  | 0.487986  | -1.719271 |
| H | 0.781420  | -1.859083 | -1.489682 |
| H | -3.935238 | -1.938610 | -0.694552 |
| H | 0.485956  | -3.965299 | -0.078096 |
| H | 0.768471  | -3.085510 | 1.448169  |
| H | -0.756255 | -3.960196 | 1.193813  |
| H | -4.726260 | 0.453036  | 0.164506  |
| H | -5.174267 | 0.756250  | 1.847260  |
| H | -5.248711 | -0.888582 | 1.200182  |
| H | 1.546565  | 3.986420  | -1.134434 |
| H | 2.189266  | 2.246218  | -0.950964 |
| H | -0.882012 | -0.614891 | -2.800340 |
| H | 3.422561  | -1.253048 | 1.930786  |
| H | 4.688499  | -1.597467 | 0.731160  |
| H | 3.081116  | 0.996726  | 0.959132  |
| H | 4.669199  | 0.720616  | 2.852096  |
| H | 5.996642  | 0.430068  | 1.713226  |
| H | 5.208622  | 2.013420  | 1.769691  |
| H | 4.694038  | 1.909266  | -0.720591 |
| H | 3.811052  | 0.533600  | -1.402067 |
| H | 5.471436  | 0.323601  | -0.843397 |

ωB97XD energy = -1304.04984034 a.u.

Lobatolide A (**11**), Conf. G

|   |           |           |           |
|---|-----------|-----------|-----------|
| C | 1.897120  | -1.990092 | -0.709185 |
| C | 2.931359  | -1.434683 | -1.631077 |
| C | 2.745908  | 0.104255  | -1.688519 |
| C | 2.516202  | 0.767432  | -0.319252 |
| C | 1.045805  | 1.182777  | 0.007459  |
| C | 0.352725  | 0.454550  | 1.191578  |
| C | -0.695346 | -0.614122 | 0.798055  |
| C | -0.203911 | -1.895615 | 0.123046  |
| O | 0.648825  | -1.548059 | -0.978466 |
| C | 0.712991  | -2.694497 | 1.073083  |
| C | 2.003616  | -2.728382 | 0.418125  |
| O | 3.299774  | 1.981090  | -0.296653 |
| C | 2.582971  | 3.074016  | 0.027894  |

|   |           |           |           |
|---|-----------|-----------|-----------|
| C | 1.168362  | 2.666193  | 0.251231  |
| C | -1.342213 | -2.774128 | -0.373389 |
| C | 4.347388  | -1.833363 | -1.214826 |
| O | 0.344201  | -3.147085 | 2.141900  |
| O | 3.068654  | 4.173163  | 0.106329  |
| C | 0.235174  | 3.546947  | 0.602040  |
| O | 1.335362  | -0.069218 | 2.056755  |
| O | -1.645129 | 0.004119  | -0.080766 |
| C | -2.681397 | 0.664323  | 0.481471  |
| O | -2.813406 | 0.793083  | 1.677277  |
| C | -3.645212 | 1.180717  | -0.553776 |
| C | -5.007969 | 0.466648  | -0.455607 |
| C | -5.989080 | 1.078824  | -1.456414 |
| C | -4.862610 | -1.040999 | -0.676799 |
| H | 2.731367  | -1.828824 | -2.635270 |
| H | 3.657493  | 0.534440  | -2.112120 |
| H | 1.925661  | 0.356505  | -2.366468 |
| H | 2.912492  | 0.145277  | 0.486148  |
| H | 0.424106  | 1.023808  | -0.877712 |
| H | -0.234539 | 1.213459  | 1.722408  |
| H | -1.212782 | -0.921957 | 1.714383  |
| H | 2.904270  | -3.156187 | 0.829588  |
| H | -1.960989 | -3.076930 | 0.475628  |
| H | -1.954150 | -2.236013 | -1.098638 |
| H | -0.933763 | -3.672954 | -0.841982 |
| H | 4.610955  | -1.403559 | -0.243260 |
| H | 5.068313  | -1.467099 | -1.949892 |
| H | 4.455228  | -2.919709 | -1.148450 |
| H | 0.504777  | 4.590297  | 0.733394  |
| H | -0.799085 | 3.261164  | 0.773120  |
| H | 0.927090  | -0.365847 | 2.876367  |
| H | -3.781528 | 2.251379  | -0.370160 |
| H | -3.218669 | 1.050259  | -1.552855 |
| H | -5.391315 | 0.633265  | 0.558107  |
| H | -6.116147 | 2.153002  | -1.288083 |
| H | -5.636939 | 0.936014  | -2.484950 |
| H | -6.972427 | 0.606447  | -1.371410 |
| H | -4.435140 | -1.249151 | -1.665122 |
| H | -5.836752 | -1.535659 | -0.620248 |
| H | -4.215079 | -1.502967 | 0.075626  |

ωB97XD energy = -1304.04973692 a.u.

Lobatolide A (**11**), Conf. H

|   |           |           |           |
|---|-----------|-----------|-----------|
| C | 2.638692  | -0.976120 | -0.784202 |
| C | 3.178453  | 0.148267  | -1.602737 |
| C | 2.140597  | 1.298624  | -1.544951 |
| C | 1.606166  | 1.594657  | -0.132379 |
| C | 0.143144  | 1.139282  | 0.177157  |
| C | -0.045267 | -0.006123 | 1.205275  |
| C | -0.301965 | -1.424606 | 0.638415  |
| C | 0.843338  | -2.148617 | -0.070966 |
| O | 1.363227  | -1.291873 | -1.097149 |
| C | 2.036661  | -2.366690 | 0.882853  |
| C | 3.129873  | -1.615863 | 0.300630  |
| O | 1.631437  | 3.030595  | 0.031744  |
| C | 0.471188  | 3.534660  | 0.491160  |

|   |           |           |           |
|---|-----------|-----------|-----------|
| C | -0.500542 | 2.419046  | 0.655618  |
| C | 0.412308  | -3.472619 | -0.684480 |
| C | 4.567297  | 0.588847  | -1.141911 |
| O | 1.973809  | -3.034150 | 1.899688  |
| O | 0.311032  | 4.707704  | 0.712124  |
| C | -1.711614 | 2.629068  | 1.164509  |
| O | 1.041095  | 0.008274  | 2.104304  |
| O | -1.398064 | -1.366110 | -0.284281 |
| C | -2.651854 | -1.434906 | 0.217224  |
| O | -2.885469 | -1.426467 | 1.404856  |
| C | -3.685797 | -1.520775 | -0.876983 |
| C | -4.312155 | -0.158119 | -1.256348 |
| C | -5.093896 | 0.462490  | -0.096647 |
| C | -3.273794 | 0.814972  | -1.818932 |
| H | 3.238188  | -0.190702 | -2.644494 |
| H | 2.625299  | 2.207963  | -1.909972 |
| H | 1.309574  | 1.080145  | -2.221097 |
| H | 2.279146  | 1.198314  | 0.631685  |
| H | -0.339962 | 0.823842  | -0.753580 |
| H | -0.972559 | 0.219239  | 1.744806  |
| H | -0.593107 | -2.058225 | 1.485318  |
| H | 4.108806  | -1.491818 | 0.736458  |
| H | 0.053547  | -4.138327 | 0.104782  |
| H | -0.377076 | -3.315503 | -1.421029 |
| H | 1.268520  | -3.945456 | -1.172229 |
| H | 4.539734  | 0.997845  | -0.126911 |
| H | 4.948179  | 1.368507  | -1.806235 |
| H | 5.276786  | -0.243425 | -1.156212 |
| H | -1.999260 | 3.634904  | 1.454843  |
| H | -2.432449 | 1.829608  | 1.309017  |
| H | 0.860000  | -0.570455 | 2.851854  |
| H | -3.226097 | -1.967017 | -1.762857 |
| H | -4.471034 | -2.188778 | -0.512359 |
| H | -5.026231 | -0.387720 | -2.057140 |
| H | -5.869105 | -0.217259 | 0.269838  |
| H | -4.439265 | 0.694573  | 0.749205  |
| H | -5.575818 | 1.391506  | -0.416072 |
| H | -2.567624 | 1.132403  | -1.045309 |
| H | -3.760384 | 1.716472  | -2.202735 |
| H | -2.699338 | 0.362729  | -2.633687 |

ωB97XD energy = -1304.04932334 a.u.

Lobatolide A (11), Conf. I

|   |           |           |           |
|---|-----------|-----------|-----------|
| C | 2.293028  | -1.725182 | -0.765248 |
| C | 3.250702  | -0.947236 | -1.605138 |
| C | 2.808735  | 0.539695  | -1.597127 |
| C | 2.402651  | 1.082092  | -0.216231 |
| C | 0.868664  | 1.199571  | 0.054881  |
| C | 0.277113  | 0.297027  | 1.172225  |
| C | -0.555027 | -0.910866 | 0.679152  |
| C | 0.176526  | -2.048647 | -0.035538 |
| O | 0.998038  | -1.496518 | -1.076113 |
| C | 1.182105  | -2.727375 | 0.918743  |
| C | 2.483547  | -2.496285 | 0.328325  |
| O | 2.938973  | 2.420771  | -0.114743 |
| C | 2.014466  | 3.343869  | 0.210935  |

|   |           |           |           |
|---|-----------|-----------|-----------|
| C | 0.697304  | 2.665929  | 0.361897  |
| C | -0.774911 | -3.078137 | -0.625696 |
| C | 4.696678  | -1.126577 | -1.142444 |
| O | 0.857373  | -3.297014 | 1.945050  |
| O | 2.276350  | 4.511667  | 0.344733  |
| C | -0.396689 | 3.336252  | 0.713701  |
| O | 1.306483  | -0.097130 | 2.051628  |
| O | -1.560989 | -0.412472 | -0.213468 |
| C | -2.701125 | 0.067082  | 0.329588  |
| O | -2.906587 | 0.091203  | 1.521315  |
| C | -3.635137 | 0.589342  | -0.732570 |
| C | -5.117265 | 0.434258  | -0.371775 |
| C | -5.981939 | 1.174017  | -1.394467 |
| C | -5.509118 | -1.043037 | -0.285037 |
| H | 3.159514  | -1.310215 | -2.636592 |
| H | 3.653684  | 1.139028  | -1.946867 |
| H | 1.992087  | 0.689527  | -2.309165 |
| H | 2.879233  | 0.511856  | 0.584372  |
| H | 0.326391  | 0.970544  | -0.866509 |
| H | -0.449670 | 0.911856  | 1.716533  |
| H | -1.046487 | -1.355326 | 1.552506  |
| H | 3.428717  | -2.779645 | 0.764051  |
| H | -1.362653 | -3.527197 | 0.179161  |
| H | -1.443195 | -2.612162 | -1.351340 |
| H | -0.202912 | -3.868018 | -1.118953 |
| H | 4.845244  | -0.722116 | -0.136034 |
| H | 5.371848  | -0.596930 | -1.818967 |
| H | 4.985344  | -2.181494 | -1.133539 |
| H | -0.333672 | 4.404833  | 0.894665  |
| H | -1.360875 | 2.851313  | 0.839751  |
| H | 0.928222  | -0.500136 | 2.839625  |
| H | -3.388417 | 1.651553  | -0.864024 |
| H | -3.407914 | 0.096708  | -1.683839 |
| H | -5.267875 | 0.890000  | 0.613590  |
| H | -5.735056 | 2.240023  | -1.436332 |
| H | -5.842872 | 0.755396  | -2.398610 |
| H | -7.042895 | 1.084270  | -1.142485 |
| H | -6.566599 | -1.149346 | -0.025010 |
| H | -4.926622 | -1.570297 | 0.476559  |
| H | -5.351544 | -1.542844 | -1.248815 |

ωB97XD energy = -1304.04926938 a.u.

Lobatolide A (11), Conf. J

|   |           |           |           |
|---|-----------|-----------|-----------|
| C | -2.269907 | -1.245723 | 0.846585  |
| C | -2.833991 | -0.224557 | 1.776816  |
| C | -1.961076 | 1.051048  | 1.655516  |
| C | -1.641161 | 1.462512  | 0.207403  |
| C | -0.190001 | 1.177510  | -0.297062 |
| C | -0.012288 | 0.102610  | -1.401264 |
| C | 0.500580  | -1.284078 | -0.936017 |
| C | -0.450979 | -2.169730 | -0.127726 |
| O | -0.935893 | -1.408227 | 0.987767  |
| C | -1.720458 | -2.514047 | -0.933122 |
| C | -2.813515 | -1.916254 | -0.193196 |
| O | -1.826753 | 2.893501  | 0.126620  |
| C | -0.783430 | 3.536495  | -0.432457 |



|   |           |           |           |
|---|-----------|-----------|-----------|
| C | 0.266558  | 2.536829  | -0.768303 |
| C | 0.214808  | -3.440378 | 0.379291  |
| C | -4.313801 | 0.048329  | 1.510090  |
| O | -1.708140 | -3.150415 | -1.971407 |
| O | -0.768341 | 4.728440  | -0.603530 |
| C | 1.388171  | 2.889246  | -1.391760 |
| O | -1.211502 | -0.007266 | -2.136483 |
| O | 1.668271  | -1.113032 | -0.123135 |
| C | 2.851837  | -0.866176 | -0.719184 |
| O | 2.961866  | -0.672200 | -1.908758 |
| C | 3.997117  | -0.910767 | 0.264165  |
| C | 3.863586  | -0.058112 | 1.544206  |
| C | 3.583107  | 1.409186  | 1.213223  |
| C | 2.853342  | -0.606495 | 2.557337  |
| H | -2.719592 | -0.604889 | 2.799684  |
| H | -2.506128 | 1.877878  | 2.118650  |
| H | -1.032643 | 0.919037  | 2.218107  |
| H | -2.363376 | 1.029447  | -0.488809 |
| H | 0.427360  | 0.873097  | 0.554889  |
| H | 0.785412  | 0.466233  | -2.056785 |
| H | 0.775447  | -1.848636 | -1.835760 |
| H | -3.847959 | -1.906840 | -0.499014 |
| H | 0.551286  | -4.037501 | -0.472226 |
| H | 1.065279  | -3.196354 | 1.017951  |
| H | -0.505965 | -4.029593 | 0.951740  |
| H | -4.700735 | 0.754023  | 2.249405  |
| H | -4.905674 | -0.869133 | 1.574835  |
| H | -4.466812 | 0.485169  | 0.518091  |
| H | 1.546254  | 3.931261  | -1.652410 |
| H | 2.158815  | 2.171067  | -1.658078 |
| H | -1.055417 | -0.495951 | -2.950685 |
| H | 4.132132  | -1.964032 | 0.541360  |
| H | 4.883279  | -0.604799 | -0.296771 |
| H | 4.853861  | -0.110867 | 2.014461  |
| H | 4.317886  | 1.810486  | 0.507459  |
| H | 2.590306  | 1.531955  | 0.767099  |
| H | 3.611160  | 2.024464  | 2.117507  |
| H | 2.931194  | -0.054595 | 3.499468  |
| H | 3.040514  | -1.664144 | 2.772228  |
| H | 1.827060  | -0.517884 | 2.191769  |

ωB97XD energy = -1304.04921604 a.u.

Lobatolide A (**11**), Conf. K

|   |           |           |           |
|---|-----------|-----------|-----------|
| C | 1.908095  | -2.024166 | -0.576934 |
| C | 3.008409  | -1.505991 | -1.442097 |
| C | 2.838326  | 0.030563  | -1.566653 |
| C | 2.518197  | 0.745553  | -0.242551 |
| C | 1.029632  | 1.171414  | -0.030597 |
| C | 0.255355  | 0.484020  | 1.127822  |
| C | -0.776138 | -0.587413 | 0.694789  |
| C | -0.246119 | -1.892871 | 0.100302  |
| O | 0.685793  | -1.583873 | -0.947428 |
| C | 0.595933  | -2.664016 | 1.139120  |
| C | 1.929099  | -2.727276 | 0.577230  |
| O | 3.299589  | 1.960649  | -0.216194 |
| C | 2.564400  | 3.063931  | 0.020578  |

|   |           |           |           |
|---|-----------|-----------|-----------|
| C | 1.138248  | 2.662340  | 0.169520  |
| C | -1.348072 | -2.784284 | -0.451133 |
| C | 4.388805  | -1.898176 | -0.915571 |
| O | 0.149506  | -3.079872 | 2.193100  |
| O | 3.045110  | 4.165993  | 0.088260  |
| C | 0.186820  | 3.553461  | 0.435151  |
| O | 1.174366  | -0.022683 | 2.069859  |
| O | -1.652161 | 0.007996  | -0.272251 |
| C | -2.679848 | 0.756459  | 0.188493  |
| O | -2.873486 | 0.953425  | 1.367089  |
| C | -3.531080 | 1.282573  | -0.937986 |
| C | -4.876402 | 0.529890  | -1.075662 |
| C | -4.661343 | -0.967759 | -1.306518 |
| C | -5.812538 | 0.783144  | 0.107920  |
| H | 2.874696  | -1.934090 | -2.443578 |
| H | 3.779633  | 0.441598  | -1.941714 |
| H | 2.068724  | 0.261327  | -2.308575 |
| H | 2.859562  | 0.155646  | 0.610992  |
| H | 0.470426  | 0.981443  | -0.950781 |
| H | -0.355769 | 1.262690  | 1.598456  |
| H | -1.361381 | -0.861241 | 1.580828  |
| H | 2.795882  | -3.147233 | 1.062940  |
| H | -1.892942 | -2.271646 | -1.244866 |
| H | -0.910819 | -3.702988 | -0.850192 |
| H | -2.037810 | -3.049649 | 0.354363  |
| H | 4.484032  | -2.982362 | -0.807924 |
| H | 4.587053  | -1.439069 | 0.058139  |
| H | 5.161052  | -1.558747 | -1.610216 |
| H | 0.449819  | 4.600697  | 0.547692  |
| H | -0.855792 | 3.272825  | 0.557005  |
| H | 0.711858  | -0.280468 | 2.873577  |
| H | -3.727523 | 2.338997  | -0.731556 |
| H | -2.970022 | 1.206154  | -1.872662 |
| H | -5.346719 | 0.946946  | -1.974890 |
| H | -5.613307 | -1.465287 | -1.513741 |
| H | -3.989482 | -1.152273 | -2.151273 |
| H | -4.227611 | -1.444947 | -0.419811 |
| H | -5.988050 | 1.853410  | 0.254484  |
| H | -5.394171 | 0.385984  | 1.037449  |
| H | -6.779771 | 0.300835  | -0.064954 |

ωB97XD energy = -1304.04862815 a.u.

Lobatolide A (**11**), Conf. L

|   |           |           |           |
|---|-----------|-----------|-----------|
| C | 2.652377  | -1.365875 | -0.648830 |
| C | 3.496252  | -0.391418 | -1.401487 |
| C | 2.738964  | 0.961238  | -1.450902 |
| C | 2.104160  | 1.381954  | -0.114209 |
| C | 0.560733  | 1.178317  | 0.008960  |
| C | 0.065719  | 0.155547  | 1.068246  |
| C | -0.433165 | -1.197989 | 0.506335  |
| C | 0.594212  | -2.142076 | -0.121002 |
| O | 1.373578  | -1.413612 | -1.082345 |
| C | 1.625892  | -2.601477 | 0.931181  |
| C | 2.898235  | -2.090961 | 0.465102  |
| O | 2.344578  | 2.797937  | 0.046147  |
| C | 1.224165  | 3.506312  | 0.285166  |

|   |           |           |           |
|---|-----------|-----------|-----------|
| C | 0.064157  | 2.572978  | 0.295655  |
| C | -0.048123 | -3.345160 | -0.794339 |
| C | 4.893410  | -0.252430 | -0.796755 |
| O | 1.334388  | -3.240178 | 1.926252  |
| O | 1.229443  | 4.698782  | 0.453066  |
| C | -1.175174 | 2.998831  | 0.525105  |
| O | 1.061082  | -0.018892 | 2.051762  |
| O | -1.431558 | -0.917657 | -0.483485 |
| C | -2.699326 | -0.710836 | -0.057177 |
| O | -3.006301 | -0.727797 | 1.112205  |
| C | -3.612694 | -0.480017 | -1.237521 |
| C | -4.980206 | 0.146038  | -0.926127 |
| C | -5.889440 | -0.781865 | -0.114605 |
| C | -4.839582 | 1.521002  | -0.265552 |
| H | 3.589098  | -0.755321 | -2.432425 |
| H | 3.457918  | 1.735672  | -1.731260 |
| H | 1.974409  | 0.932062  | -2.232244 |
| H | 2.608347  | 0.899538  | 0.726122  |
| H | 0.163101  | 0.857992  | -0.957747 |
| H | -0.828222 | 0.593734  | 1.527674  |
| H | -0.899101 | -1.747380 | 1.332891  |
| H | 3.837721  | -2.173950 | 0.988536  |
| H | -0.602065 | -3.922358 | -0.049446 |
| H | -0.725331 | -3.023450 | -1.586958 |
| H | 0.727872  | -3.985320 | -1.221360 |
| H | 4.849880  | 0.174590  | 0.210258  |
| H | 5.502456  | 0.410780  | -1.415993 |
| H | 5.401283  | -1.219156 | -0.736808 |
| H | -1.354273 | 4.053209  | 0.711550  |
| H | -2.026935 | 2.324357  | 0.539822  |
| H | 0.701074  | -0.504993 | 2.800434  |
| H | -3.061988 | 0.137049  | -1.955743 |
| H | -3.743939 | -1.456950 | -1.721427 |
| H | -5.452185 | 0.297340  | -1.905913 |
| H | -6.009402 | -1.751399 | -0.610416 |
| H | -5.481093 | -0.955578 | 0.883768  |
| H | -6.883784 | -0.337258 | -0.006299 |
| H | -4.410088 | 1.429510  | 0.737158  |
| H | -5.817640 | 2.001143  | -0.165598 |
| H | -4.202202 | 2.184799  | -0.860848 |

ωB97XD energy = -1304.04831371 a.u.

Lobatolide A (11), Conf. M

|   |           |           |           |
|---|-----------|-----------|-----------|
| C | -1.572586 | -2.079889 | 0.671661  |
| C | -2.596053 | -1.594290 | 1.643660  |
| C | -2.524954 | -0.044989 | 1.688136  |
| C | -2.396429 | 0.626362  | 0.310017  |
| C | -0.969504 | 1.129257  | -0.076610 |
| C | -0.289498 | 0.452242  | -1.298810 |
| C | 0.848009  | -0.539220 | -0.952826 |
| C | 0.474988  | -1.851466 | -0.262466 |
| O | -0.341228 | -1.564379 | 0.884075  |
| C | -0.437707 | -2.701028 | -1.172611 |
| C | -1.689358 | -2.817522 | -0.454871 |
| O | -3.252249 | 1.790759  | 0.321196  |
| C | -2.612559 | 2.927340  | -0.014173 |

|   |           |           |           |
|---|-----------|-----------|-----------|
| C | -1.185409 | 2.605633  | -0.293018 |
| C | 1.688633  | -2.663481 | 0.162806  |
| C | -3.997480 | -2.100764 | 1.302417  |
| O | -0.095931 | -3.124199 | -2.262177 |
| O | -3.163186 | 3.997241  | -0.061090 |
| C | -0.315896 | 3.542952  | -0.660495 |
| O | -1.275133 | -0.133904 | -2.117933 |
| O | 1.772146  | 0.162834  | -0.110252 |
| C | 2.730118  | 0.904378  | -0.713137 |
| O | 2.862016  | 0.953257  | -1.914230 |
| C | 3.570048  | 1.669285  | 0.280439  |
| C | 4.342109  | 0.812183  | 1.309566  |
| C | 3.468294  | 0.338911  | 2.474351  |
| C | 5.072828  | -0.349749 | 0.631518  |
| H | -2.315966 | -1.965358 | 2.637455  |
| H | -3.449598 | 0.318433  | 2.144539  |
| H | -1.701153 | 0.272272  | 2.333978  |
| H | -2.788320 | -0.020937 | -0.477514 |
| H | -0.299851 | 0.995688  | 0.776904  |
| H | 0.218772  | 1.251352  | -1.852917 |
| H | 1.353511  | -0.809054 | -1.886899 |
| H | -2.582500 | -3.295424 | -0.825670 |
| H | 2.278999  | -2.918489 | -0.721347 |
| H | 2.304936  | -2.099301 | 0.863576  |
| H | 1.361870  | -3.590192 | 0.641035  |
| H | -4.343775 | -1.699114 | 0.344570  |
| H | -4.705162 | -1.784215 | 2.072509  |
| H | -4.025985 | -3.192635 | 1.245309  |
| H | -0.648323 | 4.571003  | -0.766291 |
| H | 0.726465  | 3.318870  | -0.870323 |
| H | -0.884930 | -0.415997 | -2.951482 |
| H | 4.270181  | 2.255417  | -0.318643 |
| H | 2.910223  | 2.367913  | 0.809216  |
| H | 5.101581  | 1.485843  | 1.726043  |
| H | 2.666918  | -0.321746 | 2.134386  |
| H | 4.073547  | -0.205524 | 3.206044  |
| H | 3.003697  | 1.187914  | 2.986777  |
| H | 5.705386  | -0.880746 | 1.349113  |
| H | 5.708691  | 0.000137  | -0.187842 |
| H | 4.363748  | -1.075851 | 0.217431  |

ωB97XD energy = -1304.04795012 a.u.

Lobatolide A (11), Conf. N

|   |           |           |           |
|---|-----------|-----------|-----------|
| C | -1.929050 | -1.712107 | 0.881696  |
| C | -2.685433 | -0.908329 | 1.886409  |
| C | -2.205469 | 0.562854  | 1.787047  |
| C | -2.076637 | 1.098079  | 0.350293  |
| C | -0.627761 | 1.180670  | -0.226935 |
| C | -0.282952 | 0.252101  | -1.423944 |
| C | 0.611481  | -0.966048 | -1.079928 |
| C | -0.001412 | -2.088906 | -0.240080 |
| O | -0.593474 | -1.512049 | 0.934118  |
| C | -1.185994 | -2.747932 | -0.976690 |
| C | -2.343924 | -2.483177 | -0.147770 |
| O | -2.591995 | 2.448267  | 0.353388  |
| C | -1.736995 | 3.348385  | -0.170017 |

|   |           |           |           |
|---|-----------|-----------|-----------|
| C | -0.496358 | 2.638958  | -0.587293 |
| C | 1.018391  | -3.139077 | 0.173976  |
| C | -4.197985 | -1.042499 | 1.711415  |
| O | -1.077209 | -3.332421 | -2.039437 |
| O | -1.997013 | 4.520848  | -0.257557 |
| C | 0.510535  | 3.279217  | -1.176338 |
| O | -1.471822 | -0.139751 | -2.074028 |
| O | 1.757499  | -0.494285 | -0.360161 |
| C | 2.757440  | 0.088183  | -1.047902 |
| O | 2.731567  | 0.239259  | -2.248677 |
| C | 3.888759  | 0.550325  | -0.159975 |
| C | 4.014394  | -0.073980 | 1.239587  |
| C | 5.431760  | 0.161248  | 1.771840  |
| C | 2.979056  | 0.474023  | 2.227317  |
| H | -2.409738 | -1.275512 | 2.883040  |
| H | -2.937748 | 1.188090  | 2.304985  |
| H | -1.253031 | 0.680506  | 2.311985  |
| H | -2.716609 | 0.536205  | -0.333557 |
| H | 0.084398  | 0.957776  | 0.572024  |
| H | 0.330382  | 0.845128  | -2.110429 |
| H | 0.943147  | -1.416116 | -2.023211 |
| H | -3.361899 | -2.746275 | -0.388557 |
| H | 1.445176  | -3.601901 | -0.719496 |
| H | 0.526411  | -3.915538 | 0.765138  |
| H | 1.813735  | -2.686035 | 0.768066  |
| H | -4.526330 | -0.632951 | 0.750889  |
| H | -4.713878 | -0.494118 | 2.503582  |
| H | -4.514433 | -2.088121 | 1.764088  |
| H | 0.430664  | 4.346873  | -1.356328 |
| H | 1.414517  | 2.770952  | -1.501164 |
| H | -1.265133 | -0.530770 | -2.928719 |
| H | 4.799084  | 0.384192  | -0.743980 |
| H | 3.786688  | 1.641234  | -0.072210 |
| H | 3.862906  | -1.156739 | 1.143264  |
| H | 6.188557  | -0.265478 | 1.105764  |
| H | 5.635972  | 1.234040  | 1.871503  |
| H | 5.556494  | -0.293325 | 2.759344  |
| H | 3.098699  | 1.558081  | 2.344699  |
| H | 3.112740  | 0.017478  | 3.213193  |
| H | 1.957739  | 0.271453  | 1.898666  |

ωB97XD energy = -1304.04784854 a.u.

Lobatolide A (**11**), Conf. O

|   |           |           |           |
|---|-----------|-----------|-----------|
| C | -1.420450 | -1.978410 | 0.911065  |
| C | -2.324789 | -1.426939 | 1.963134  |
| C | -2.338105 | 0.119422  | 1.823300  |
| C | -2.401428 | 0.621799  | 0.370375  |
| C | -1.054567 | 1.145298  | -0.221322 |
| C | -0.490988 | 0.388227  | -1.458073 |
| C | 0.710686  | -0.540647 | -1.170610 |
| C | 0.470719  | -1.792469 | -0.318017 |
| O | -0.194631 | -1.410532 | 0.897829  |
| C | -0.528015 | -2.740977 | -1.012364 |
| C | -1.660957 | -2.824708 | -0.115393 |
| O | -3.326672 | 1.730344  | 0.331550  |
| C | -2.787174 | 2.858115  | -0.170334 |

|   |           |           |           |
|---|-----------|-----------|-----------|
| C | -1.367575 | 2.586584  | -0.529083 |
| C | 1.753748  | -2.535764 | 0.022533  |
| C | -3.728242 | -2.027409 | 1.882742  |
| O | -0.332423 | -3.246035 | -2.103391 |
| O | -3.404877 | 3.886058  | -0.278475 |
| C | -0.573105 | 3.534675  | -1.018329 |
| O | -1.544767 | -0.284497 | -2.106944 |
| O | 1.680246  | 0.300521  | -0.539429 |
| C | 2.948867  | 0.311139  | -1.015278 |
| O | 3.302765  | -0.335199 | -1.972051 |
| C | 3.838885  | 1.195187  | -0.182171 |
| C | 4.234933  | 0.557730  | 1.171905  |
| C | 5.481268  | 1.260898  | 1.716514  |
| C | 3.099379  | 0.606174  | 2.198862  |
| H | -1.888078 | -1.666627 | 2.940405  |
| H | -3.224664 | 0.494879  | 2.341295  |
| H | -1.465639 | 0.547239  | 2.325460  |
| H | -2.828073 | -0.139063 | -0.285950 |
| H | -0.283361 | 1.110922  | 0.551498  |
| H | -0.074742 | 1.156266  | -2.124677 |
| H | 1.113723  | -0.896768 | -2.125676 |
| H | -2.576639 | -3.360615 | -0.310288 |
| H | 2.260801  | -2.829910 | -0.898848 |
| H | 2.418139  | -1.906011 | 0.617994  |
| H | 1.515627  | -3.432951 | 0.599496  |
| H | -4.221801 | -1.759983 | 0.942844  |
| H | -4.342614 | -1.648200 | 2.703023  |
| H | -3.700699 | -3.118270 | 1.957595  |
| H | -0.964709 | 4.534687  | -1.176902 |
| H | 0.466720  | 3.341444  | -1.266239 |
| H | -1.224351 | -0.710239 | -2.909030 |
| H | 4.734102  | 1.379984  | -0.779757 |
| H | 3.337079  | 2.151965  | 0.002260  |
| H | 4.497063  | -0.492433 | 0.983555  |
| H | 5.786999  | 0.822316  | 2.671217  |
| H | 6.322414  | 1.180029  | 1.021162  |
| H | 5.282177  | 2.325774  | 1.886152  |
| H | 2.194192  | 0.107091  | 1.845402  |
| H | 2.839408  | 1.647285  | 2.425642  |
| H | 3.411238  | 0.128364  | 3.132905  |

ωB97XD energy = -1304.04775851 a.u.

3-methylenecyclopent-1-ene (**12**), Conf. A

|   |           |           |           |
|---|-----------|-----------|-----------|
| C | -1.532490 | -0.606618 | -0.000018 |
| C | -0.097939 | -1.193970 | 0.000018  |
| C | 0.835251  | 0.010070  | 0.000005  |
| C | -0.012461 | 1.207429  | 0.000008  |
| C | -1.311559 | 0.885040  | 0.000002  |
| C | 2.172388  | -0.016115 | -0.000012 |
| H | -2.108694 | -0.921047 | 0.878054  |
| H | -2.108641 | -0.921028 | -0.878131 |
| H | 0.081813  | -1.818402 | 0.879949  |
| H | 0.081843  | -1.818456 | -0.879868 |
| H | 0.389019  | 2.215268  | 0.000014  |
| H | -2.128950 | 1.598710  | 0.000001  |

|   |          |           |           |
|---|----------|-----------|-----------|
| H | 2.722550 | -0.952377 | -0.000019 |
| H | 2.751919 | 0.902313  | -0.000020 |

ωB97XD energy = -233.356186215 a.u.

(*S*)-4-isopropyl-1-methyl-3-methylenecyclohex-1-ene (**13**), Conf. A

|   |           |           |           |
|---|-----------|-----------|-----------|
| C | 0.784587  | 0.117595  | 0.719106  |
| C | -0.042546 | 1.334180  | 0.350008  |
| C | -1.356402 | 1.057864  | -0.249167 |
| C | -1.938791 | -0.152407 | -0.239013 |
| C | -1.282666 | -1.326385 | 0.446055  |
| C | -0.157816 | -0.896685 | 1.389041  |
| C | 1.533268  | -0.457507 | -0.515324 |
| C | 2.554951  | 0.542823  | -1.063868 |
| C | 2.229892  | -1.784116 | -0.194021 |
| C | 0.385066  | 2.589285  | 0.542959  |
| C | -3.265029 | -0.414047 | -0.892842 |
| H | 1.547520  | 0.420132  | 1.449317  |
| H | -1.871160 | 1.896181  | -0.716320 |
| H | -2.043069 | -1.889166 | 1.002333  |
| H | -0.904454 | -2.021266 | -0.319129 |
| H | -0.599983 | -0.418890 | 2.271321  |
| H | 0.394212  | -1.769385 | 1.749588  |
| H | 0.791937  | -0.642845 | -1.304538 |
| H | 2.085719  | 1.487233  | -1.349236 |
| H | 3.323004  | 0.761428  | -0.311029 |
| H | 3.058763  | 0.133001  | -1.945228 |
| H | 2.826249  | -2.118802 | -1.048805 |
| H | 1.520936  | -2.582631 | 0.042424  |
| H | 2.908938  | -1.670592 | 0.660387  |
| H | -0.221349 | 3.444577  | 0.256395  |
| H | 1.352877  | 2.794226  | 0.991268  |
| H | -3.660967 | 0.479342  | -1.382663 |
| H | -3.174864 | -1.206439 | -1.646508 |
| H | -4.001391 | -0.759712 | -0.157180 |

ωB97XD energy = -429.902877726 a.u.

(*S*)-4-isopropyl-1-methyl-3-methylenecyclohex-1-ene (**13**), Conf. B

|   |           |           |           |
|---|-----------|-----------|-----------|
| C | -0.625953 | -0.097196 | -0.410835 |
| C | 0.174537  | 1.185808  | -0.222308 |
| C | 1.631714  | 1.013578  | -0.111472 |
| C | 2.248436  | -0.173282 | -0.003271 |
| C | 1.454356  | -1.452805 | 0.070257  |
| C | -0.002503 | -1.204753 | 0.453815  |
| C | -2.151602 | 0.042713  | -0.223292 |
| C | -2.905580 | -1.153898 | -0.814151 |
| C | -2.561274 | 0.268559  | 1.236274  |
| C | -0.348658 | 2.420528  | -0.207176 |
| C | 3.743197  | -0.305401 | 0.051136  |
| H | -0.463624 | -0.389436 | -1.461475 |
| H | 2.229339  | 1.923860  | -0.135264 |
| H | 1.508678  | -1.963636 | -0.903113 |
| H | 1.925161  | -2.132906 | 0.791537  |
| H | -0.571662 | -2.134338 | 0.354541  |

|   |           |           |           |
|---|-----------|-----------|-----------|
| H | -0.047328 | -0.909604 | 1.509146  |
| H | -2.465714 | 0.919237  | -0.803287 |
| H | -3.986624 | -0.991726 | -0.752210 |
| H | -2.649413 | -1.307965 | -1.867847 |
| H | -2.686013 | -2.081461 | -0.274146 |
| H | -2.399459 | -0.635390 | 1.833928  |
| H | -3.625813 | 0.515978  | 1.302355  |
| H | -1.993521 | 1.083490  | 1.694428  |
| H | 0.295075  | 3.290541  | -0.110822 |
| H | -1.412441 | 2.612216  | -0.288342 |
| H | 4.242590  | 0.659923  | -0.065398 |
| H | 4.060729  | -0.747119 | 1.003636  |
| H | 4.100020  | -0.974786 | -0.741527 |

ωB97XD energy = -429.900736923 a.u.

(*S*)-4-isopropyl-1-methyl-3-methylenecyclohex-1-ene (**13**), Conf. C

|   |           |           |           |
|---|-----------|-----------|-----------|
| C | 0.826578  | -0.032425 | 0.860443  |
| C | 0.232610  | 1.221675  | 0.248036  |
| C | -1.124785 | 1.113211  | -0.301750 |
| C | -1.925967 | 0.049496  | -0.131603 |
| C | -1.490760 | -1.136715 | 0.690659  |
| C | -0.279679 | -0.828626 | 1.573263  |
| C | 1.664433  | -0.872719 | -0.151722 |
| C | 1.046694  | -1.031360 | -1.546414 |
| C | 3.077547  | -0.296072 | -0.293942 |
| C | 0.906662  | 2.379704  | 0.192105  |
| C | -3.291264 | -0.035211 | -0.751277 |
| H | 1.532097  | 0.283252  | 1.638556  |
| H | -1.485169 | 1.962909  | -0.880251 |
| H | -2.329717 | -1.464515 | 1.318093  |
| H | -1.283240 | -1.983209 | 0.020790  |
| H | -0.621929 | -0.232656 | 2.428121  |
| H | 0.136891  | -1.756601 | 1.981357  |
| H | 1.758972  | -1.873777 | 0.293314  |
| H | 1.692557  | -1.659208 | -2.169318 |
| H | 0.057031  | -1.491541 | -1.524227 |
| H | 0.949566  | -0.058406 | -2.039484 |
| H | 3.578919  | -0.213657 | 0.676332  |
| H | 3.044058  | 0.701659  | -0.745650 |
| H | 3.693330  | -0.931833 | -0.938726 |
| H | 0.474761  | 3.263260  | -0.270459 |
| H | 1.901361  | 2.478971  | 0.616447  |
| H | -3.522972 | 0.850191  | -1.349208 |
| H | -3.364317 | -0.916330 | -1.401288 |
| H | -4.064612 | -0.144256 | 0.018802  |

ωB97XD = -429.900265174 a.u.

(*S*)-4-isopropyl-1-methyl-3-methylenecyclohex-1-ene (**13**), Conf. D

|   |           |           |           |
|---|-----------|-----------|-----------|
| C | -0.881583 | 0.383756  | -0.720385 |
| C | 0.112043  | 1.427084  | -0.241697 |
| C | 1.435257  | 0.954591  | 0.180888  |
| C | 1.865918  | -0.309625 | 0.042966  |
| C | 1.014054  | -1.358750 | -0.624158 |
| C | -0.136345 | -0.756809 | -1.433953 |

|   |           |           |           |
|---|-----------|-----------|-----------|
| C | -1.863721 | -0.030062 | 0.415643  |
| C | -2.869740 | -1.080087 | -0.064048 |
| C | -1.216411 | -0.466745 | 1.734015  |
| C | -0.213636 | 2.725577  | -0.166770 |
| C | 3.208460  | -0.758553 | 0.544222  |
| H | -1.516364 | 0.860181  | -1.478814 |
| H | 2.090058  | 1.691825  | 0.643854  |
| H | 1.648178  | -1.965503 | -1.283952 |
| H | 0.640633  | -2.055666 | 0.138231  |
| H | 0.283364  | -0.341193 | -2.358182 |
| H | -0.836680 | -1.540435 | -1.738259 |
| H | -2.426514 | 0.887167  | 0.636676  |
| H | -3.671907 | -1.204909 | 0.670562  |
| H | -3.327060 | -0.795127 | -1.018091 |

|   |           |           |           |
|---|-----------|-----------|-----------|
| H | -2.395303 | -2.059011 | -0.197217 |
| H | -0.494797 | 0.270951  | 2.094038  |
| H | -0.701916 | -1.427571 | 1.637609  |
| H | -1.987665 | -0.587188 | 2.502336  |
| H | 0.487593  | 3.465738  | 0.209040  |
| H | -1.190740 | 3.083599  | -0.479966 |
| H | 3.750721  | 0.053721  | 1.035521  |
| H | 3.096218  | -1.579049 | 1.264056  |
| H | 3.826404  | -1.139801 | -0.277782 |

$\omega$ B97XD = -429.899998873 energy

**Table S39.** Cartesian coordinates and energies of the low-energy conformers calculated at the  $\omega$ B97XD/6-31+G(d,p) SMD/CHCl<sub>3</sub> level.

|                                                                       |           |           |           |                                                                       |           |           |           |
|-----------------------------------------------------------------------|-----------|-----------|-----------|-----------------------------------------------------------------------|-----------|-----------|-----------|
| (2 <i>S</i> ,6 <i>R</i> ,7 <i>S</i> ,8 <i>R</i> )- <b>1</b> , Conf. A |           |           |           | H                                                                     | 4.698160  | -1.033428 | -2.928599 |
| C                                                                     | -4.251428 | -0.715675 | -0.619466 | H                                                                     | 5.906979  | -1.411481 | -1.687300 |
|                                                                       |           |           |           | $\omega$ B97XD energy = -1154.85285053 a.u.                           |           |           |           |
| C                                                                     | -3.288624 | 0.356915  | -1.046384 | (2 <i>S</i> ,6 <i>R</i> ,7 <i>S</i> ,8 <i>R</i> )- <b>1</b> , Conf. B |           |           |           |
| C                                                                     | -2.934759 | 1.456131  | -0.366894 | C                                                                     | -4.285924 | -0.961682 | -0.533989 |
| C                                                                     | -3.628035 | 1.984455  | 0.860926  | C                                                                     | -3.417404 | 0.165628  | -1.017446 |
| C                                                                     | -2.282654 | -1.730204 | 0.558653  | C                                                                     | -3.117113 | 1.300729  | -0.371789 |
| C                                                                     | -3.469935 | -2.021961 | -0.327255 | C                                                                     | -3.799308 | 1.803543  | 0.872650  |
| C                                                                     | -0.432128 | 1.328870  | -0.703460 | C                                                                     | -2.211292 | -1.794865 | 0.614336  |
| C                                                                     | -0.147751 | 0.690575  | 0.681867  | C                                                                     | -3.402102 | -2.196979 | -0.223011 |
| C                                                                     | 0.080858  | -0.837404 | 0.634201  | C                                                                     | -0.623432 | 1.341029  | -0.788052 |
| C                                                                     | -1.083337 | -1.539055 | -0.003327 | C                                                                     | -0.244440 | 0.764973  | 0.601554  |
| O                                                                     | 0.725477  | 2.144358  | -1.017444 | C                                                                     | 0.088925  | -0.744713 | 0.586345  |
| C                                                                     | 1.565122  | 2.267631  | 0.024144  | C                                                                     | -1.045490 | -1.540963 | 0.008579  |
| C                                                                     | 1.065915  | 1.440963  | 1.155132  | O                                                                     | 0.459102  | 2.229405  | -1.165287 |
| O                                                                     | 2.554664  | 2.962992  | -0.026608 | C                                                                     | 1.317232  | 2.451183  | -0.155803 |
| C                                                                     | 1.670036  | 1.404821  | 2.340165  | C                                                                     | 0.924523  | 1.617615  | 1.011817  |
| C                                                                     | -1.680526 | 2.218723  | -0.768996 | O                                                                     | 2.242537  | 3.224956  | -0.256911 |
| C                                                                     | -2.587672 | -1.450273 | 2.004390  | C                                                                     | 1.570476  | 1.661238  | 2.174445  |
| O                                                                     | -5.194092 | -1.041073 | -1.640570 | C                                                                     | -1.933866 | 2.137948  | -0.834425 |
| O                                                                     | 1.251835  | -1.059341 | -0.172894 | C                                                                     | -2.490858 | -1.500069 | 2.061852  |
| C                                                                     | 2.226563  | -1.860040 | 0.292226  | O                                                                     | -5.225604 | -1.390077 | -1.519068 |
| O                                                                     | 2.165834  | -2.438033 | 1.358159  | O                                                                     | 1.242104  | -0.920828 | -0.259827 |
| C                                                                     | 3.375091  | -1.927265 | -0.678751 | C                                                                     | 2.325922  | -1.544177 | 0.233290  |
| C                                                                     | 4.066206  | -0.565735 | -0.893030 | O                                                                     | 2.397999  | -1.968738 | 1.368659  |
| C                                                                     | 4.672903  | -0.041906 | 0.409523  | C                                                                     | 3.421058  | -1.656335 | -0.794954 |
| C                                                                     | 5.131907  | -0.693429 | -1.981922 | C                                                                     | 4.760153  | -1.085596 | -0.296764 |
| H                                                                     | -4.788539 | -0.418074 | 0.288951  | C                                                                     | 5.848707  | -1.334817 | -1.341485 |
| H                                                                     | -2.717739 | 0.096557  | -1.939676 | C                                                                     | 4.636294  | 0.405359  | 0.023033  |
| H                                                                     | -4.537397 | 1.438868  | 1.120118  | H                                                                     | -4.822261 | -0.675980 | 0.378502  |
| H                                                                     | -3.900914 | 3.034464  | 0.699519  | H                                                                     | -2.862418 | -0.073267 | -1.926755 |
| H                                                                     | -3.136854 | -2.427533 | -1.288689 | H                                                                     | -4.651030 | 1.194394  | 1.181228  |
| H                                                                     | -4.156685 | -2.744657 | 0.126929  | H                                                                     | -4.161649 | 2.824802  | 0.702510  |
| H                                                                     | -2.958024 | 1.972543  | 1.729615  | H                                                                     | -3.070358 | -2.611921 | -1.180881 |
| H                                                                     | -0.992198 | 0.851756  | 1.356429  | H                                                                     | -4.021163 | -2.949884 | 0.277020  |
| H                                                                     | 0.283523  | -1.191584 | 1.647703  | H                                                                     | -3.095870 | 1.863544  | 1.712134  |
| H                                                                     | -0.965779 | -1.730394 | -1.068343 | H                                                                     | -1.074330 | 0.882400  | 1.303013  |
| H                                                                     | 1.297086  | 0.786230  | 3.151599  | H                                                                     | 0.351061  | -1.052505 | 1.601034  |
| H                                                                     | 2.562950  | 1.996279  | 2.521353  | H                                                                     | -0.948401 | -1.756311 | -1.053858 |
| H                                                                     | -1.531285 | 3.072519  | -0.098503 | H                                                                     | 1.276876  | 1.037495  | 3.014031  |
| H                                                                     | -0.475815 | 0.571761  | -1.487387 | H                                                                     | 2.417350  | 2.328589  | 2.307783  |
| H                                                                     | -1.763945 | 2.618416  | -1.785317 | H                                                                     | -1.825098 | 3.020275  | -0.193861 |
| H                                                                     | -1.691056 | -1.388919 | 2.626191  | H                                                                     | -0.638334 | 0.560889  | -1.550239 |
| H                                                                     | -3.233736 | -2.233332 | 2.415840  | H                                                                     | -2.076257 | 2.499566  | -1.858326 |
| H                                                                     | -3.133020 | -0.503365 | 2.106236  | H                                                                     | -3.171081 | -0.644130 | 2.156363  |
| H                                                                     | -5.700015 | -0.246958 | -1.847407 | H                                                                     | -1.588705 | -1.278232 | 2.637138  |
| H                                                                     | 4.091499  | -2.660013 | -0.296527 | H                                                                     | -2.991558 | -2.353942 | 2.531928  |
| H                                                                     | 2.982703  | -2.294419 | -1.633981 | H                                                                     | -5.796428 | -0.644030 | -1.735777 |
| H                                                                     | 3.307254  | 0.147434  | -1.236368 | H                                                                     | 3.533726  | -2.724463 | -1.015618 |
| H                                                                     | 5.143485  | 0.933732  | 0.253124  | H                                                                     | 3.112076  | -1.151545 | -1.714992 |
| H                                                                     | 3.917497  | 0.077972  | 1.193579  | H                                                                     | 5.029312  | -1.619401 | 0.622631  |
| H                                                                     | 5.437201  | -0.733657 | 0.785201  |                                                                       |           |           |           |
| H                                                                     | 5.618409  | 0.271245  | -2.159885 |                                                                       |           |           |           |

|   |          |           |           |
|---|----------|-----------|-----------|
| H | 6.813444 | -0.949978 | -0.994189 |
| H | 5.968961 | -2.403471 | -1.550451 |
| H | 5.608436 | -0.829825 | -2.285133 |
| H | 5.593128 | 0.811118  | 0.368052  |
| H | 3.897825 | 0.591945  | 0.809989  |
| H | 4.331273 | 0.971809  | -0.864903 |

ωB97XD energy = -1154.85173206 a.u.

(2*S*,6*R*,7*S*,8*R*)-1, Conf. C

|   |           |           |           |
|---|-----------|-----------|-----------|
| C | -4.321551 | -1.007037 | -0.478981 |
| C | -3.489313 | 0.148885  | -0.959057 |
| C | -3.187983 | 1.273032  | -0.295015 |
| C | -3.842110 | 1.735055  | 0.979959  |
| C | -2.197223 | -1.832838 | 0.574549  |
| C | -3.404448 | -2.233439 | -0.238987 |
| C | -0.711618 | 1.362377  | -0.790768 |
| C | -0.273297 | 0.767144  | 0.573582  |
| C | 0.076604  | -0.739432 | 0.519962  |
| C | -1.052892 | -1.541821 | -0.055487 |
| O | 0.344302  | 2.271377  | -1.193523 |
| C | 1.248403  | 2.472835  | -0.221308 |
| C | 0.909452  | 1.618405  | 0.947822  |
| O | 2.171324  | 3.245499  | -0.351701 |
| C | 1.613104  | 1.639261  | 2.077165  |
| C | -2.033546 | 2.141140  | -0.773894 |
| C | -2.439796 | -1.572824 | 2.035749  |
| O | -5.289440 | -1.422667 | -1.441854 |
| O | 1.223926  | -0.875375 | -0.340446 |
| C | 2.357433  | -1.395055 | 0.163052  |
| O | 2.454486  | -1.820853 | 1.295423  |
| C | 3.458321  | -1.403519 | -0.865811 |
| C | 4.852151  | -1.168157 | -0.270381 |
| C | 5.918635  | -1.367109 | -1.348887 |
| C | 4.958508  | 0.226589  | 0.350785  |
| H | -4.828674 | -0.759072 | 0.460882  |
| H | -2.959329 | -0.056665 | -1.891112 |
| H | -3.113797 | 1.799357  | 1.797679  |
| H | -4.666314 | 1.096610  | 1.303557  |
| H | -3.094802 | -2.608664 | -1.220472 |
| H | -3.991825 | -3.015796 | 0.254163  |
| H | -4.237872 | 2.748474  | 0.839963  |
| H | -1.075137 | 0.868400  | 1.309580  |
| H | 0.355293  | -1.066205 | 1.524255  |
| H | -0.978267 | -1.730057 | -1.124699 |
| H | 1.361920  | 0.999397  | 2.918199  |
| H | 2.465339  | 2.305174  | 2.179571  |
| H | -1.916311 | 3.007496  | -0.113234 |
| H | -0.744720 | 0.595453  | -1.565663 |
| H | -2.214711 | 2.527180  | -1.782550 |
| H | -2.973426 | -2.415249 | 2.489137  |
| H | -3.072650 | -0.686305 | 2.169156  |
| H | -1.516932 | -1.414043 | 2.599180  |
| H | -5.878025 | -0.679620 | -1.617617 |
| H | 3.416541  | -2.388032 | -1.349969 |
| H | 3.233410  | -0.657950 | -1.635215 |
| H | 5.010020  | -1.914427 | 0.517553  |

|   |          |           |           |
|---|----------|-----------|-----------|
| H | 6.922292 | -1.241599 | -0.928956 |
| H | 5.860627 | -2.367357 | -1.792035 |
| H | 5.800373 | -0.632643 | -2.155164 |
| H | 5.948678 | 0.381209  | 0.792459  |
| H | 4.215679 | 0.376576  | 1.141503  |
| H | 4.802839 | 1.003574  | -0.407640 |

ωB97XD energy = -1154.85154715 a.u.

(2*S*,6*R*,7*S*,8*R*)-1, Conf. D

|   |           |           |           |
|---|-----------|-----------|-----------|
| C | -3.774514 | -1.596454 | -0.422025 |
| C | -3.094711 | -0.441517 | -1.101809 |
| C | -3.105046 | 0.846159  | -0.731827 |
| C | -4.024976 | 1.448316  | 0.297460  |
| C | -1.727840 | -1.687340 | 1.025247  |
| C | -2.703449 | -2.513314 | 0.221620  |
| C | -0.638414 | 1.338272  | -0.980223 |
| C | -0.313861 | 1.194215  | 0.530934  |
| C | 0.293271  | -0.175221 | 0.918417  |
| C | -0.574480 | -1.310544 | 0.460924  |
| O | 0.287714  | 2.324934  | -1.501482 |
| C | 0.995820  | 2.928836  | -0.533808 |
| C | 0.638548  | 2.331148  | 0.780762  |
| O | 1.789482  | 3.811338  | -0.773404 |
| C | 1.153560  | 2.764095  | 1.928946  |
| C | -2.065583 | 1.800368  | -1.302017 |
| C | -2.233984 | -1.154145 | 2.337038  |
| O | -4.499005 | -2.419648 | -1.335632 |
| O | 1.564882  | -0.279651 | 0.252077  |
| C | 2.676118  | -0.468211 | 0.984734  |
| O | 2.672762  | -0.571069 | 2.194471  |
| C | 3.897502  | -0.529617 | 0.107087  |
| C | 3.816647  | -1.614276 | -0.983350 |
| C | 5.088211  | -1.588029 | -1.831985 |
| C | 3.589130  | -2.998258 | -0.371485 |
| H | -4.452997 | -1.242370 | 0.362891  |
| H | -2.396592 | -0.748890 | -1.882420 |
| H | -3.460986 | 1.852367  | 1.147114  |
| H | -4.559995 | 2.296943  | -0.145800 |
| H | -2.185669 | -3.032340 | -0.592079 |
| H | -3.212152 | -3.263969 | 0.836204  |
| H | -4.768588 | 0.747564  | 0.682330  |
| H | -1.223859 | 1.307381  | 1.125701  |
| H | 0.464966  | -0.184308 | 1.997082  |
| H | -0.307566 | -1.721808 | -0.510887 |
| H | 0.892913  | 2.307636  | 2.879408  |
| H | 1.862625  | 3.587117  | 1.937666  |
| H | -2.206212 | 2.803266  | -0.883011 |
| H | -0.415602 | 0.418263  | -1.522466 |
| H | -2.159540 | 1.889488  | -2.389494 |
| H | -1.447331 | -0.698022 | 2.943130  |
| H | -2.692704 | -1.957657 | 2.923220  |
| H | -3.011832 | -0.397858 | 2.171896  |
| H | -5.183923 | -1.880839 | -1.747996 |
| H | 4.017669  | 0.455239  | -0.360015 |
| H | 4.758948  | -0.706226 | 0.757098  |
| H | 2.964120  | -1.376525 | -1.630438 |

|   |          |           |           |
|---|----------|-----------|-----------|
| H | 5.037739 | -2.338080 | -2.628272 |
| H | 5.237025 | -0.608396 | -2.298971 |
| H | 5.971823 | -1.808935 | -1.220519 |
| H | 3.562578 | -3.766575 | -1.151183 |
| H | 2.641536 | -3.052106 | 0.176878  |
| H | 4.395211 | -3.254482 | 0.326842  |

ωB97XD energy = -1154.85112748 a.u.

(2*S*,6*R*,7*S*,8*R*)-1, Conf. E

|   |           |           |           |
|---|-----------|-----------|-----------|
| C | -3.714319 | -1.461765 | -0.505159 |
| C | -2.912086 | -0.404630 | -1.210879 |
| C | -2.892118 | 0.911774  | -0.960812 |
| C | -3.870794 | 1.646432  | -0.083706 |
| C | -1.833178 | -1.498318 | 1.160146  |
| C | -2.766486 | -2.353554 | 0.337114  |
| C | -0.395308 | 1.274272  | -0.968241 |
| C | -0.259735 | 1.248362  | 0.576992  |
| C | 0.271055  | -0.095174 | 1.124774  |
| C | -0.608556 | -1.234237 | 0.691469  |
| O | 0.637286  | 2.172455  | -1.448077 |
| C | 1.237109  | 2.844253  | -0.451623 |
| C | 0.674360  | 2.394192  | 0.850091  |
| O | 2.093820  | 3.674012  | -0.659425 |
| C | 1.003249  | 2.959659  | 2.008891  |
| C | -1.749766 | 1.761234  | -1.499183 |
| C | -2.437064 | -0.820546 | 2.358966  |
| O | -4.376108 | -2.341912 | -1.413243 |
| O | 1.584000  | -0.250082 | 0.558547  |
| C | 2.476149  | -1.016511 | 1.205281  |
| O | 2.235720  | -1.565722 | 2.261006  |
| C | 3.788551  | -1.068399 | 0.466972  |
| C | 3.655358  | -1.402637 | -1.028636 |
| C | 5.025380  | -1.332310 | -1.703264 |
| C | 3.011420  | -2.775397 | -1.231982 |
| H | -4.454366 | -1.007342 | 0.164019  |
| H | -2.158583 | -0.811997 | -1.887536 |
| H | -4.308981 | 2.481259  | -0.643920 |
| H | -3.369471 | 2.089668  | 0.785786  |
| H | -2.195918 | -2.976618 | -0.359856 |
| H | -3.377160 | -3.014188 | 0.962284  |
| H | -4.688544 | 1.019297  | 0.276377  |
| H | -1.231420 | 1.410997  | 1.048996  |
| H | 0.364869  | -0.021645 | 2.212024  |
| H | -0.269410 | -1.747803 | -0.206479 |
| H | 0.576567  | 2.622873  | 2.949355  |
| H | 1.717898  | 3.777340  | 2.037491  |
| H | -1.885170 | 2.807241  | -1.202129 |
| H | -0.157635 | 0.302668  | -1.403130 |
| H | -1.714615 | 1.738464  | -2.593598 |
| H | -3.177332 | -0.073334 | 2.046283  |
| H | -1.694848 | -0.317625 | 2.983853  |
| H | -2.966762 | -1.549635 | 2.981707  |
| H | -4.990106 | -1.821708 | -1.944003 |
| H | 4.259352  | -0.084154 | 0.584198  |
| H | 4.420343  | -1.803544 | 0.973922  |
| H | 3.008561  | -0.643988 | -1.484198 |

|   |          |           |           |
|---|----------|-----------|-----------|
| H | 4.939315 | -1.536017 | -2.775863 |
| H | 5.479619 | -0.342668 | -1.584125 |
| H | 5.712791 | -2.072818 | -1.275994 |
| H | 2.888016 | -2.992290 | -2.298208 |
| H | 2.021740 | -2.836492 | -0.764909 |
| H | 3.634182 | -3.566168 | -0.796081 |

ωB97XD energy = -1154.85094993 a.u.

(2*S*,6*R*,7*S*,8*R*)-1, Conf. F

|   |           |           |           |
|---|-----------|-----------|-----------|
| C | -4.073744 | -1.500149 | -0.482011 |
| C | -3.438598 | -0.244294 | -1.009487 |
| C | -3.336708 | 0.942216  | -0.395196 |
| C | -4.076174 | 1.341963  | 0.854144  |
| C | -1.877096 | -1.914472 | 0.656615  |
| C | -2.968917 | -2.542779 | -0.176040 |
| C | -0.899402 | 1.425711  | -0.840295 |
| C | -0.417240 | 0.990253  | 0.569231  |
| C | 0.173565  | -0.440463 | 0.618383  |
| C | -0.783154 | -1.443684 | 0.046121  |
| O | 0.005078  | 2.474043  | -1.272748 |
| C | 0.844261  | 2.863964  | -0.300233 |
| C | 0.601021  | 2.042022  | 0.915279  |
| O | 1.651176  | 3.751756  | -0.464704 |
| C | 1.248754  | 2.246626  | 2.059702  |
| C | -2.334143 | 1.966145  | -0.907271 |
| C | -2.206041 | -1.662751 | 2.102488  |
| O | -4.942775 | -2.113884 | -1.433330 |
| O | 1.367603  | -0.439132 | -0.188452 |
| C | 2.558137  | -0.635189 | 0.407725  |
| O | 2.681803  | -0.923341 | 1.579833  |
| C | 3.689786  | -0.401061 | -0.558735 |
| C | 4.961069  | -1.193351 | -0.237530 |
| C | 4.736453  | -2.696101 | -0.422298 |
| C | 6.116692  | -0.701313 | -1.110747 |
| H | -4.630225 | -1.298123 | 0.440673  |
| H | -2.868065 | -0.399560 | -1.927095 |
| H | -4.803486 | 0.599240  | 1.187210  |
| H | -4.612421 | 2.281884  | 0.676088  |
| H | -2.566875 | -2.888228 | -1.134683 |
| H | -3.429908 | -3.399633 | 0.327579  |
| H | -3.382223 | 1.537826  | 1.680828  |
| H | -1.249471 | 1.004394  | 1.277403  |
| H | 0.451288  | -0.663826 | 1.650652  |
| H | -0.647431 | -1.645188 | -1.014858 |
| H | 1.066573  | 1.632757  | 2.936779  |
| H | 1.986804  | 3.039901  | 2.138681  |
| H | -2.389063 | 2.882911  | -0.309178 |
| H | -0.776332 | 0.621912  | -1.567583 |
| H | -2.543555 | 2.244380  | -1.945530 |
| H | -1.336314 | -1.356558 | 2.689027  |
| H | -2.623259 | -2.565791 | 2.561124  |
| H | -2.968180 | -0.878748 | 2.195253  |
| H | -5.635188 | -1.482387 | -1.659548 |
| H | 3.341668  | -0.610078 | -1.575734 |
| H | 3.891315  | 0.678192  | -0.513516 |
| H | 5.214617  | -1.008180 | 0.812888  |



|   |          |           |           |
|---|----------|-----------|-----------|
| H | 5.641313 | -3.258545 | -0.168233 |
| H | 3.926159 | -3.066662 | 0.214247  |
| H | 4.482775 | -2.924084 | -1.465217 |
| H | 7.038151 | -1.246937 | -0.881320 |
| H | 6.310355 | 0.365571  | -0.954825 |
| H | 5.896782 | -0.851728 | -2.174975 |

ωB97XD energy = -1154.85072800 a.u.

(2*S*,6*R*,7*S*,8*R*)-1, Conf. G

|   |           |           |           |
|---|-----------|-----------|-----------|
| C | -3.739890 | -1.781627 | -0.371468 |
| C | -3.192141 | -0.551181 | -1.038263 |
| C | -3.242670 | 0.711521  | -0.592959 |
| C | -4.092385 | 1.197416  | 0.551339  |
| C | -1.597864 | -1.802132 | 0.939809  |
| C | -2.565876 | -2.649560 | 0.149140  |
| C | -0.838685 | 1.382345  | -0.974619 |
| C | -0.411073 | 1.198432  | 0.506115  |
| C | 0.305037  | -0.142103 | 0.794232  |
| C | -0.514666 | -1.309561 | 0.327456  |
| O | -0.015918 | 2.452392  | -1.503806 |
| C | 0.703177  | 3.068011  | -0.551704 |
| C | 0.472124  | 2.390945  | 0.752334  |
| O | 1.410820  | 4.019648  | -0.795643 |
| C | 1.020168  | 2.817601  | 1.887358  |
| C | -2.311340 | 1.753953  | -1.193334 |
| C | -2.045553 | -1.392563 | 2.315487  |
| O | -4.471402 | -2.611529 | -1.273104 |
| O | 1.543569  | -0.134932 | 0.058138  |
| C | 2.697788  | -0.297823 | 0.726772  |
| O | 2.761509  | -0.454600 | 1.929673  |
| C | 3.885389  | -0.295233 | -0.196623 |
| C | 4.517842  | -1.697691 | -0.308936 |
| C | 3.511052  | -2.723164 | -0.835532 |
| C | 5.758718  | -1.634147 | -1.199399 |
| H | -4.382107 | -1.512471 | 0.475444  |
| H | -2.551186 | -0.769724 | -1.894540 |
| H | -4.709553 | 2.039883  | 0.216050  |
| H | -3.473000 | 1.578963  | 1.372406  |
| H | -2.068409 | -3.085269 | -0.724018 |
| H | -2.979805 | -3.468032 | 0.748269  |
| H | -4.760629 | 0.433406  | 0.953076  |
| H | -1.286334 | 1.221526  | 1.160580  |
| H | 0.534951  | -0.187563 | 1.861021  |
| H | -0.290475 | -1.642359 | -0.684452 |
| H | 0.850554  | 2.307993  | 2.831394  |
| H | 1.662174  | 3.694142  | 1.890820  |
| H | -2.492784 | 2.732725  | -0.735018 |
| H | -0.588733 | 0.503352  | -1.570345 |
| H | -2.478082 | 1.865330  | -2.269941 |
| H | -1.256291 | -0.901569 | 2.890052  |
| H | -2.384495 | -2.267158 | 2.881304  |
| H | -2.896740 | -0.702950 | 2.255508  |
| H | -5.214066 | -2.101668 | -1.616578 |
| H | 3.582515  | 0.059669  | -1.186140 |
| H | 4.617394  | 0.406536  | 0.215571  |
| H | 4.828021  | -2.002149 | 0.698487  |

|   |          |           |           |
|---|----------|-----------|-----------|
| H | 3.982412 | -3.705224 | -0.946877 |
| H | 2.657932 | -2.842571 | -0.158325 |
| H | 3.123408 | -2.421620 | -1.816303 |
| H | 6.250507 | -2.611271 | -1.249794 |
| H | 6.487277 | -0.909078 | -0.820625 |
| H | 5.492003 | -1.341335 | -2.222324 |

ωB97XD energy = -1154.85069198 a.u.

(2*S*,6*R*,7*S*,8*R*)-1, Conf. H

|   |           |           |           |
|---|-----------|-----------|-----------|
| C | -4.216141 | -0.629296 | -0.576820 |
| C | -3.242965 | 0.447729  | -0.965123 |
| C | -2.842528 | 1.491490  | -0.227114 |
| C | -3.486380 | 1.955413  | 1.052600  |
| C | -2.246430 | -1.746631 | 0.502943  |
| C | -3.453200 | -1.963576 | -0.378671 |
| C | -0.343573 | 1.355173  | -0.630659 |
| C | -0.036647 | 0.631870  | 0.708014  |
| C | 0.136104  | -0.900758 | 0.590233  |
| C | -1.056011 | -1.530384 | -0.068874 |
| O | 0.806037  | 2.194054  | -0.910405 |
| C | 1.665396  | 2.251259  | 0.121150  |
| C | 1.201032  | 1.333824  | 1.195006  |
| O | 2.647292  | 2.958729  | 0.099932  |
| C | 1.849435  | 1.192618  | 2.348530  |
| C | -1.587724 | 2.254806  | -0.622275 |
| C | -2.521282 | -1.562644 | 1.969832  |
| O | -5.187793 | -0.878528 | -1.592295 |
| O | 1.287743  | -1.176732 | -0.232292 |
| C | 2.311351  | -1.873998 | 0.295066  |
| O | 2.347622  | -2.229395 | 1.455874  |
| C | 3.382393  | -2.171570 | -0.723894 |
| C | 4.228307  | -0.952147 | -1.162134 |
| C | 3.493829  | -0.034546 | -2.140225 |
| C | 4.769454  | -0.179096 | 0.041958  |
| H | -4.727248 | -0.374471 | 0.359027  |
| H | -2.706541 | 0.235185  | -1.891784 |
| H | -4.388293 | 1.399916  | 1.316949  |
| H | -3.759164 | 3.013619  | 0.956994  |
| H | -3.143879 | -2.315056 | -1.369041 |
| H | -4.145320 | -2.700953 | 0.042712  |
| H | -2.784580 | 1.895603  | 1.893542  |
| H | -0.860458 | 0.780456  | 1.411323  |
| H | 0.323967  | -1.299282 | 1.589246  |
| H | -0.962342 | -1.651260 | -1.146557 |
| H | 1.504586  | 0.505330  | 3.115336  |
| H | 2.753329  | 1.761832  | 2.546275  |
| H | -1.411113 | 3.073460  | 0.084515  |
| H | -0.398222 | 0.647837  | -1.459910 |
| H | -1.690004 | 2.704178  | -1.615804 |
| H | -3.167948 | -2.365040 | 2.341152  |
| H | -3.053954 | -0.619534 | 2.145592  |
| H | -1.612367 | -1.551469 | 2.576453  |
| H | -5.682395 | -0.064695 | -1.741959 |
| H | 4.035184  | -2.918422 | -0.266315 |
| H | 2.905953  | -2.620798 | -1.601866 |
| H | 5.084943  | -1.383156 | -1.695144 |

|   |          |           |           |
|---|----------|-----------|-----------|
| H | 4.152474 | 0.775681  | -2.470044 |
| H | 3.164037 | -0.585608 | -3.028037 |
| H | 2.610486 | 0.420798  | -1.685728 |
| H | 5.457257 | 0.607968  | -0.283140 |
| H | 5.307763 | -0.838468 | 0.731562  |
| H | 3.960119 | 0.304111  | 0.600869  |

ωB97XD energy = -1154.85055201 a.u.

(2*S*,6*R*,7*S*,8*R*)-1, Conf. I

|   |           |           |           |
|---|-----------|-----------|-----------|
| C | -4.163994 | -1.022269 | -0.413516 |
| C | -3.361109 | 0.149652  | -0.904769 |
| C | -3.079176 | 1.281792  | -0.245863 |
| C | -3.729492 | 1.728239  | 1.036679  |
| C | -2.011716 | -1.803192 | 0.620809  |
| C | -3.220830 | -2.229547 | -0.177249 |
| C | -0.610391 | 1.429440  | -0.764246 |
| C | -0.159982 | 0.829404  | 0.593214  |
| C | 0.245714  | -0.658568 | 0.514908  |
| C | -0.883185 | -1.491741 | -0.026179 |
| O | 0.426358  | 2.366171  | -1.152443 |
| C | 1.303429  | 2.600455  | -0.161862 |
| C | 0.971945  | 1.731374  | 0.999388  |
| O | 2.195448  | 3.411056  | -0.270959 |
| C | 1.625130  | 1.798135  | 2.156649  |
| C | -1.950578 | 2.176864  | -0.736834 |
| C | -2.238974 | -1.550373 | 2.085203  |
| O | -5.131696 | -1.460335 | -1.366678 |
| O | 1.363877  | -0.729048 | -0.389306 |
| C | 2.250370  | -1.725880 | -0.219413 |
| O | 2.165343  | -2.537831 | 0.679981  |
| C | 3.338470  | -1.692765 | -1.260434 |
| C | 4.611139  | -0.940234 | -0.801968 |
| C | 4.331767  | 0.532851  | -0.500937 |
| C | 5.297629  | -1.628446 | 0.378875  |
| H | -4.667909 | -0.781043 | 0.529708  |
| H | -2.836737 | -0.045630 | -1.842178 |
| H | -4.536145 | 1.071555  | 1.367792  |
| H | -4.148197 | 2.733160  | 0.902651  |
| H | -2.914847 | -2.603872 | -1.160199 |
| H | -3.787988 | -3.020698 | 0.325602  |
| H | -2.994453 | 1.806590  | 1.847300  |
| H | -0.973518 | 0.878181  | 1.320669  |
| H | 0.575441  | -0.984810 | 1.505132  |
| H | -0.823715 | -1.683224 | -1.096124 |
| H | 1.367518  | 1.155804  | 2.994185  |
| H | 2.440167  | 2.504567  | 2.287500  |
| H | -1.848755 | 3.046581  | -0.077837 |
| H | -0.624454 | 0.671295  | -1.548200 |
| H | -2.149930 | 2.557856  | -1.743917 |
| H | -2.921674 | -0.703311 | 2.229624  |
| H | -1.316247 | -1.337641 | 2.630686  |
| H | -2.713874 | -2.421344 | 2.550333  |
| H | -5.734934 | -0.728946 | -1.541692 |
| H | 3.595086  | -2.731498 | -1.486762 |
| H | 2.946377  | -1.221843 | -2.165913 |
| H | 5.292065  | -0.987707 | -1.660921 |

|   |          |           |           |
|---|----------|-----------|-----------|
| H | 5.267617 | 1.069548  | -0.313061 |
| H | 3.822663 | 1.026752  | -1.334746 |
| H | 3.703043 | 0.644629  | 0.389512  |
| H | 6.252320 | -1.140090 | 0.601161  |
| H | 5.498218 | -2.684041 | 0.166574  |
| H | 4.681218 | -1.582054 | 1.283631  |

ωB97XD energy = -1154.85039085 a.u.

(2*S*,6*R*,7*S*,8*R*)-1, Conf. J

|   |           |           |           |
|---|-----------|-----------|-----------|
| C | -4.253201 | -0.607180 | -0.714490 |
| C | -3.282531 | 0.498448  | -1.018364 |
| C | -2.888051 | 1.481402  | -0.198136 |
| C | -3.538317 | 1.831497  | 1.114349  |
| C | -2.312853 | -1.779613 | 0.368609  |
| C | -3.483359 | -1.944417 | -0.571800 |
| C | -0.380723 | 1.381409  | -0.540735 |
| C | -0.096916 | 0.603469  | 0.773149  |
| C | 0.056014  | -0.928247 | 0.601995  |
| C | -1.105035 | -1.514259 | -0.143029 |
| O | 0.768217  | 2.238105  | -0.763686 |
| C | 1.628971  | 2.227332  | 0.266983  |
| C | 1.152645  | 1.261773  | 1.292401  |
| O | 2.618673  | 2.924182  | 0.284624  |
| C | 1.806540  | 1.051846  | 2.432238  |
| C | -1.631001 | 2.272079  | -0.524548 |
| C | -2.642014 | -1.722072 | 1.834680  |
| O | -5.198644 | -0.808037 | -1.764409 |
| O | 1.252550  | -1.178325 | -0.162007 |
| C | 2.284110  | -1.801099 | 0.435927  |
| O | 2.238395  | -2.226657 | 1.572937  |
| C | 3.491486  | -1.891657 | -0.458043 |
| C | 4.141273  | -0.518010 | -0.759751 |
| C | 5.631498  | -0.711553 | -1.048187 |
| C | 3.457842  | 0.199406  | -1.925147 |
| H | -4.787350 | -0.409046 | 0.222122  |
| H | -2.740936 | 0.359075  | -1.956078 |
| H | -3.759756 | 2.905303  | 1.136817  |
| H | -2.862353 | 1.639017  | 1.956814  |
| H | -3.134083 | -2.230463 | -1.569877 |
| H | -4.184885 | -2.711009 | -0.224638 |
| H | -4.470489 | 1.293380  | 1.295958  |
| H | -0.923160 | 0.742305  | 1.475496  |
| H | 0.183251  | -1.370011 | 1.591935  |
| H | -0.974943 | -1.555265 | -1.223047 |
| H | 1.456318  | 0.334372  | 3.167954  |
| H | 2.721084  | 1.596976  | 2.648879  |
| H | -1.478497 | 3.061102  | 0.220515  |
| H | -0.414075 | 0.708678  | -1.399694 |
| H | -1.711661 | 2.760745  | -1.501206 |
| H | -3.244281 | -0.834170 | 2.063534  |
| H | -1.754753 | -1.698048 | 2.472145  |
| H | -3.241762 | -2.592902 | 2.122258  |
| H | -5.695815 | 0.009384  | -1.882576 |
| H | 4.202739  | -2.539047 | 0.059486  |
| H | 3.207713  | -2.378803 | -1.398436 |
| H | 4.050251  | 0.107477  | 0.138195  |

|   |          |           |           |
|---|----------|-----------|-----------|
| H | 6.108713 | 0.246181  | -1.280876 |
| H | 6.151012 | -1.148476 | -0.188827 |
| H | 5.778242 | -1.378293 | -1.907100 |
| H | 3.887012 | 1.195642  | -2.071294 |
| H | 2.384328 | 0.316206  | -1.762363 |
| H | 3.596325 | -0.367768 | -2.854376 |

ωB97XD energy = -1154.85028579 a.u.

(2S,6R,7S,8R)-1, Conf. K

|   |           |           |           |
|---|-----------|-----------|-----------|
| C | -4.238457 | -0.958752 | -0.425089 |
| C | -3.423833 | 0.219992  | -0.879571 |
| C | -3.088439 | 1.305108  | -0.168912 |
| C | -3.674240 | 1.689893  | 1.163947  |
| C | -2.084664 | -1.832419 | 0.526548  |
| C | -3.314283 | -2.194085 | -0.271776 |
| C | -0.625482 | 1.445118  | -0.736625 |
| C | -0.160788 | 0.773621  | 0.582232  |
| C | 0.189201  | -0.724530 | 0.446146  |
| C | -0.963850 | -1.499628 | -0.123957 |
| O | 0.409592  | 2.397232  | -1.090886 |
| C | 1.311679  | 2.564596  | -0.109419 |
| C | 1.012301  | 1.616876  | 0.997388  |
| O | 2.203831  | 3.378700  | -0.188625 |
| C | 1.736239  | 1.564859  | 2.112703  |
| C | -1.958531 | 2.202132  | -0.652075 |
| C | -2.279582 | -1.662344 | 2.007553  |
| O | -5.236771 | -1.331306 | -1.374232 |
| O | 1.304186  | -0.826241 | -0.461020 |
| C | 2.309132  | -1.663359 | -0.145904 |
| O | 2.342644  | -2.299622 | 0.888355  |
| C | 3.362577  | -1.705213 | -1.222696 |
| C | 4.648506  | -0.923995 | -0.865487 |
| C | 4.359657  | 0.557810  | -0.622592 |
| C | 5.406733  | -1.542806 | 0.310086  |
| H | -4.715526 | -0.754017 | 0.540576  |
| H | -2.936975 | 0.065963  | -1.844575 |
| H | -4.488096 | 1.038780  | 1.488432  |
| H | -4.063805 | 2.713615  | 1.109048  |
| H | -3.032874 | -2.518552 | -1.279534 |
| H | -3.887042 | -3.001200 | 0.198106  |
| H | -2.905607 | 1.695082  | 1.946602  |
| H | -0.955120 | 0.825918  | 1.331050  |
| H | 0.502854  | -1.097182 | 1.423878  |
| H | -0.928221 | -1.628497 | -1.204156 |
| H | 1.512686  | 0.856656  | 2.905501  |
| H | 2.576781  | 2.238616  | 2.252977  |
| H | -1.830086 | 3.044470  | 0.037197  |
| H | -0.654758 | 0.727056  | -1.557621 |
| H | -2.174709 | 2.623329  | -1.639402 |
| H | -2.766787 | -2.547797 | 2.430673  |
| H | -2.938077 | -0.809924 | 2.215293  |
| H | -1.341872 | -1.503333 | 2.545531  |
| H | -5.822964 | -0.577486 | -1.506707 |
| H | 3.610389  | -2.759060 | -1.383738 |
| H | 2.939154  | -1.302553 | -2.146202 |
| H | 5.284379  | -1.004167 | -1.756092 |

|   |          |           |           |
|---|----------|-----------|-----------|
| H | 5.293325 | 1.116622  | -0.500698 |
| H | 3.806577 | 1.004135  | -1.455336 |
| H | 3.770099 | 0.702811  | 0.289806  |
| H | 6.364316 | -1.030910 | 0.455015  |
| H | 5.613606 | -2.604694 | 0.138835  |
| H | 4.837252 | -1.461017 | 1.241810  |

ωB97XD energy = -1154.85022746 a.u.

(2S,6R,7S,8R)-1, Conf. L

|   |           |           |           |
|---|-----------|-----------|-----------|
| C | -4.432894 | -0.363314 | 0.024220  |
| C | -3.484496 | 0.809981  | 0.180170  |
| C | -2.724475 | 1.394283  | -0.755042 |
| C | -2.821615 | 1.123826  | -2.232179 |
| C | -2.366342 | -1.735985 | 0.466658  |
| C | -3.666807 | -1.679310 | -0.294697 |
| C | -0.263591 | 1.525199  | -0.292496 |
| C | -0.089223 | 0.559319  | 0.910610  |
| C | 0.019186  | -0.930277 | 0.519090  |
| C | -1.236848 | -1.383554 | -0.158909 |
| O | 0.818842  | 2.487903  | -0.203216 |
| C | 1.637438  | 2.258401  | 0.835940  |
| C | 1.143185  | 1.082570  | 1.597810  |
| O | 2.606319  | 2.950470  | 1.055355  |
| C | 1.761388  | 0.623559  | 2.683312  |
| C | -1.586945 | 2.302574  | -0.337791 |
| C | -2.474986 | -1.952839 | 1.950870  |
| O | -5.408614 | -0.219499 | -1.004666 |
| O | 1.125472  | -1.049997 | -0.393928 |
| C | 2.128728  | -1.899097 | -0.109449 |
| O | 2.140603  | -2.621563 | 0.866043  |
| C | 3.209535  | -1.813705 | -1.153743 |
| C | 3.921586  | -0.445045 | -1.172102 |
| C | 4.633805  | -0.171106 | 0.153549  |
| C | 4.900719  | -0.389661 | -2.344802 |
| H | -4.948921 | -0.493822 | 0.984958  |
| H | -3.296690 | 1.088527  | 1.217445  |
| H | -3.616227 | 0.418431  | -2.474919 |
| H | -1.872931 | 0.733845  | -2.622571 |
| H | -3.472717 | -1.690562 | -1.371569 |
| H | -4.321143 | -2.525539 | -0.057663 |
| H | -3.017106 | 2.059801  | -2.769755 |
| H | -0.956013 | 0.640467  | 1.575013  |
| H | 0.244176  | -1.512731 | 1.414828  |
| H | -1.267523 | -1.201088 | -1.231744 |
| H | 1.394873  | -0.242445 | 3.226808  |
| H | 2.659154  | 1.111622  | 3.051573  |
| H | -1.770074 | 2.745794  | 0.646943  |
| H | -0.102970 | 1.002375  | -1.238188 |
| H | -1.463354 | 3.119033  | -1.058060 |
| H | -2.922535 | -1.075599 | 2.437829  |
| H | -1.509355 | -2.140357 | 2.426312  |
| H | -3.132550 | -2.801721 | 2.166863  |
| H | -5.898804 | 0.594996  | -0.844385 |
| H | 3.930399  | -2.611576 | -0.954456 |
| H | 2.748037  | -1.998488 | -2.130091 |
| H | 3.159427  | 0.329538  | -1.324407 |

|   |          |           |           |
|---|----------|-----------|-----------|
| H | 5.116195 | 0.811171  | 0.138207  |
| H | 3.939572 | -0.184594 | 1.000163  |
| H | 5.406156 | -0.927000 | 0.341665  |
| H | 5.405174 | 0.581359  | -2.383569 |
| H | 4.388929 | -0.540716 | -3.301553 |
| H | 5.671757 | -1.164151 | -2.248497 |

ωB97XD energy = -1154.85013252 a.u.

(2S,6R,7S,8R)-1, Conf. M

|   |           |           |           |
|---|-----------|-----------|-----------|
| C | -3.674093 | -1.773540 | -0.280308 |
| C | -3.170449 | -0.518115 | -0.934977 |
| C | -3.207295 | 0.729596  | -0.448082 |
| C | -4.001427 | 1.172842  | 0.751846  |
| C | -1.470240 | -1.811699 | 0.924281  |
| C | -2.468340 | -2.644392 | 0.155602  |
| C | -0.831530 | 1.429473  | -0.930320 |
| C | -0.325934 | 1.212061  | 0.520915  |
| C | 0.411537  | -0.130564 | 0.736313  |
| C | -0.423021 | -1.289571 | 0.274948  |
| O | -0.041068 | 2.515437  | -1.476549 |
| C | 0.730469  | 3.107052  | -0.550598 |
| C | 0.564106  | 2.403042  | 0.748929  |
| O | 1.428374  | 4.061683  | -0.810564 |
| C | 1.160116  | 2.812135  | 1.865996  |
| C | -2.315163 | 1.797959  | -1.062092 |
| C | -1.852678 | -1.450951 | 2.333070  |
| O | -4.442084 | -2.583149 | -1.170117 |
| O | 1.611598  | -0.091264 | -0.057738 |
| C | 2.801439  | -0.251821 | 0.549292  |
| O | 2.924266  | -0.426185 | 1.745064  |
| C | 3.934082  | -0.210169 | -0.441207 |
| C | 4.334885  | -1.611747 | -0.963282 |
| C | 4.902667  | -2.503633 | 0.142532  |
| C | 3.185876  | -2.309056 | -1.695897 |
| H | -4.275812 | -1.536844 | 0.605047  |
| H | -2.573689 | -0.703920 | -1.830043 |
| H | -4.635840 | 0.388547  | 1.168834  |
| H | -4.647582 | 2.013524  | 0.470859  |
| H | -2.009285 | -3.048222 | -0.753314 |
| H | -2.844777 | -3.485322 | 0.748306  |
| H | -3.344124 | 1.543533  | 1.547971  |
| H | -1.164575 | 1.213393  | 1.221751  |
| H | 0.692718  | -0.204547 | 1.789051  |
| H | -0.247866 | -1.587069 | -0.757410 |
| H | 1.033067  | 2.285491  | 2.807356  |
| H | 1.798136  | 3.691527  | 1.857543  |
| H | -2.479426 | 2.760678  | -0.565010 |
| H | -0.609379 | 0.566089  | -1.558813 |
| H | -2.536377 | 1.940667  | -2.125108 |
| H | -2.144696 | -2.348474 | 2.889299  |
| H | -2.719503 | -0.777992 | 2.337897  |
| H | -1.044123 | -0.960439 | 2.880474  |
| H | -5.200268 | -2.067381 | -1.467709 |
| H | 3.643084  | 0.422340  | -1.284230 |
| H | 4.790400  | 0.246607  | 0.061927  |
| H | 5.134613  | -1.425393 | -1.690544 |

|   |          |           |           |
|---|----------|-----------|-----------|
| H | 5.274961 | -3.442921 | -0.280402 |
| H | 5.732630 | -2.015636 | 0.664774  |
| H | 4.139142 | -2.752342 | 0.887825  |
| H | 3.540012 | -3.233563 | -2.163852 |
| H | 2.762281 | -1.672327 | -2.479783 |
| H | 2.377539 | -2.575602 | -1.005232 |

ωB97XD energy = -1154.84957433 a.u.

(2S,6R,7S,8R)-1, Conf. N

|   |           |           |           |
|---|-----------|-----------|-----------|
| C | -4.445738 | -0.587116 | 0.074600  |
| C | -3.585165 | 0.661420  | 0.083742  |
| C | -2.855723 | 1.172486  | -0.916567 |
| C | -2.923769 | 0.714248  | -2.348550 |
| C | -2.286028 | -1.754578 | 0.651768  |
| C | -3.588409 | -1.873346 | -0.098713 |
| C | -0.407125 | 1.547627  | -0.489610 |
| C | -0.161896 | 0.731627  | 0.808465  |
| C | 0.038708  | -0.782832 | 0.587527  |
| C | -1.187842 | -1.389404 | -0.020750 |
| O | 0.583649  | 2.607885  | -0.496367 |
| C | 1.406845  | 2.562203  | 0.562727  |
| C | 1.030882  | 1.412003  | 1.425097  |
| O | 2.293329  | 3.371150  | 0.721918  |
| C | 1.711910  | 1.095255  | 2.523571  |
| C | -1.790012 | 2.204245  | -0.616997 |
| C | -2.373537 | -1.818509 | 2.152174  |
| O | -5.432009 | -0.633807 | -0.954175 |
| O | 1.143205  | -0.954255 | -0.322866 |
| C | 2.203266  | -1.684120 | 0.064346  |
| O | 2.302786  | -2.196034 | 1.161193  |
| C | 3.241936  | -1.782722 | -1.021712 |
| C | 4.559085  | -1.078319 | -0.643406 |
| C | 5.592381  | -1.297109 | -1.749269 |
| C | 4.336302  | 0.412466  | -0.382303 |
| H | -4.949834 | -0.642027 | 1.048734  |
| H | -3.433295 | 1.086802  | 1.075870  |
| H | -1.949819 | 0.344629  | -2.692721 |
| H | -3.180959 | 1.560763  | -2.997250 |
| H | -3.394368 | -1.993931 | -1.168766 |
| H | -4.181518 | -2.731185 | 0.237081  |
| H | -3.668788 | -0.066884 | -2.499636 |
| H | -1.030307 | 0.829157  | 1.469059  |
| H | 0.301650  | -1.241559 | 1.542396  |
| H | -1.236758 | -1.323328 | -1.106299 |
| H | 1.442825  | 0.243125  | 3.140888  |
| H | 2.569596  | 1.689718  | 2.825741  |
| H | -2.007161 | 2.740121  | 0.313627  |
| H | -0.188718 | 0.943978  | -1.373913 |
| H | -1.730251 | 2.942335  | -1.424564 |
| H | -3.011028 | -2.652750 | 2.463379  |
| H | -2.830182 | -0.903246 | 2.553701  |
| H | -1.398342 | -1.940754 | 2.630265  |
| H | -5.976872 | 0.158478  | -0.885109 |
| H | 3.429686  | -2.849283 | -1.185483 |
| H | 2.844423  | -1.356243 | -1.947513 |
| H | 4.933276  | -1.541180 | 0.278190  |

|   |          |           |           |
|---|----------|-----------|-----------|
| H | 6.548058 | -0.832480 | -1.485228 |
| H | 5.772774 | -2.363117 | -1.925495 |
| H | 5.253439 | -0.851083 | -2.692414 |
| H | 5.284501 | 0.915443  | -0.166418 |
| H | 3.675009 | 0.580067  | 0.473616  |
| H | 3.888859 | 0.901768  | -1.256208 |

ωB97XD energy = -1154.84939525 a.u.

(2S,6R,7S,8R)-1, Conf. O

|   |           |           |           |
|---|-----------|-----------|-----------|
| C | -3.962722 | -1.612734 | -0.444915 |
| C | -3.366897 | -0.367638 | -1.029981 |
| C | -3.319311 | 0.851931  | -0.479144 |
| C | -4.102478 | 1.295632  | 0.727723  |
| C | -1.769194 | -1.867023 | 0.770051  |
| C | -2.813546 | -2.586687 | -0.047397 |
| C | -0.892633 | 1.410973  | -0.902160 |
| C | -0.424130 | 1.080876  | 0.540108  |
| C | 0.221726  | -0.317853 | 0.691449  |
| C | -0.677118 | -1.393316 | 0.158251  |
| O | -0.023135 | 2.470202  | -1.377982 |
| C | 0.778550  | 2.950987  | -0.414782 |
| C | 0.546133  | 2.189857  | 0.841866  |
| O | 1.550304  | 3.862379  | -0.614895 |
| C | 1.169641  | 2.480657  | 1.980888  |
| C | -2.346377 | 1.884061  | -1.030950 |
| C | -2.148712 | -1.536090 | 2.187248  |
| O | -4.806597 | -2.217935 | -1.422147 |
| O | 1.439306  | -0.312069 | -0.079666 |
| C | 2.610189  | -0.493335 | 0.555872  |
| O | 2.698052  | -0.756574 | 1.737946  |
| C | 3.782455  | -0.305194 | -0.370603 |
| C | 4.830103  | -1.421468 | -0.247359 |
| C | 4.259432  | -2.760807 | -0.719958 |
| C | 6.084771  | -1.046776 | -1.037050 |
| H | -4.551437 | -1.379032 | 0.449618  |
| H | -2.772866 | -0.549980 | -1.927111 |
| H | -3.437890 | 1.578422  | 1.553558  |
| H | -4.804389 | 0.543540  | 1.092647  |
| H | -2.373830 | -2.971379 | -0.974128 |
| H | -3.245882 | -3.432938 | 0.501414  |
| H | -4.678127 | 2.194517  | 0.475329  |
| H | -1.271481 | 1.100832  | 1.229937  |
| H | 0.477688  | -0.467667 | 1.742459  |
| H | -0.504417 | -1.655010 | -0.884183 |
| H | 0.998779  | 1.909824  | 2.888857  |
| H | 1.876846  | 3.304253  | 2.024039  |
| H | -2.453098 | 2.831827  | -0.491330 |
| H | -0.719915 | 0.571332  | -1.576703 |
| H | -2.543393 | 2.090354  | -2.088374 |
| H | -2.543883 | -2.423497 | 2.693453  |
| H | -2.942194 | -0.778530 | 2.205732  |
| H | -1.308943 | -1.156288 | 2.774022  |
| H | -5.148634 | -3.044512 | -1.061644 |
| H | 3.425718  | -0.219589 | -1.401345 |
| H | 4.230038  | 0.658734  | -0.097504 |
| H | 5.098439  | -1.512751 | 0.811812  |

|   |          |           |           |
|---|----------|-----------|-----------|
| H | 4.998897 | -3.560608 | -0.606682 |
| H | 3.369532 | -3.049237 | -0.148860 |
| H | 3.978708 | -2.710178 | -1.779286 |
| H | 6.844346 | -1.831845 | -0.958828 |
| H | 6.525104 | -0.114377 | -0.667167 |
| H | 5.853561 | -0.910560 | -2.100733 |

ωB97XD energy = -1154.84938455 a.u.

(2R,6R,7S,8R)-1, Conf. A

|   |           |           |           |
|---|-----------|-----------|-----------|
| C | 4.434891  | -0.232376 | 0.444967  |
| C | 3.478283  | 0.882239  | 0.096985  |
| C | 2.647893  | 1.519900  | 0.929493  |
| C | 2.657035  | 1.340448  | 2.423941  |
| C | 2.439413  | -1.690079 | -0.148846 |
| C | 3.684095  | -1.573933 | 0.696291  |
| C | 0.216469  | 1.545623  | 0.312519  |
| C | 0.128378  | 0.509788  | -0.841148 |
| C | 0.038098  | -0.958340 | -0.372518 |
| C | 1.266142  | -1.341450 | 0.394508  |
| O | -0.884002 | 2.470324  | 0.113768  |
| C | -1.640986 | 2.162051  | -0.951362 |
| C | -1.081796 | 0.956895  | -1.615649 |
| O | -2.610997 | 2.817804  | -1.259345 |
| C | -1.637152 | 0.412752  | -2.695716 |
| C | 1.516728  | 2.359581  | 0.377275  |
| C | 2.641944  | -1.970219 | -1.612160 |
| O | 5.356851  | -0.455579 | -0.621847 |
| O | -1.113028 | -1.056179 | 0.487166  |
| C | -2.101320 | -1.913991 | 0.177143  |
| O | -2.051615 | -2.687756 | -0.756821 |
| C | -3.253372 | -1.760108 | 1.134102  |
| C | -3.968656 | -0.400544 | 0.985816  |
| C | -4.624244 | -0.263708 | -0.389344 |
| C | -4.998719 | -0.232524 | 2.102988  |
| H | 4.997958  | 0.003255  | 1.357797  |
| H | 3.366820  | 1.051641  | -0.974600 |
| H | 3.514976  | 0.762934  | 2.775342  |
| H | 1.749890  | 0.825716  | 2.765394  |
| H | 3.409128  | -1.606427 | 1.755296  |
| H | 4.395752  | -2.384375 | 0.505924  |
| H | 2.673131  | 2.314765  | 2.925595  |
| H | 1.024996  | 0.579695  | -1.466014 |
| H | -0.125080 | -1.596094 | -1.243425 |
| H | 1.227763  | -1.115145 | 1.458888  |
| H | -1.224672 | -0.476575 | -3.163658 |
| H | -2.527730 | 0.851694  | -3.136402 |
| H | 1.751114  | 2.731036  | -0.626490 |
| H | 0.022503  | 1.070383  | 1.277040  |
| H | 1.331659  | 3.225691  | 1.022478  |
| H | 3.111957  | -1.110592 | -2.106087 |
| H | 1.709785  | -2.197517 | -2.135383 |
| H | 3.326288  | -2.814235 | -1.746930 |
| H | 5.847327  | 0.360217  | -0.775345 |
| H | -3.956186 | -2.577844 | 0.951391  |
| H | -2.861208 | -1.858666 | 2.152256  |

|   |           |           |           |
|---|-----------|-----------|-----------|
| H | -3.214302 | 0.389456  | 1.092681  |
| H | -5.101428 | 0.715603  | -0.495084 |
| H | -3.896811 | -0.366092 | -1.201184 |
| H | -5.393010 | -1.033685 | -0.529296 |
| H | -5.504986 | 0.734666  | 2.018257  |
| H | -4.528581 | -0.283202 | 3.090965  |
| H | -5.763472 | -1.017224 | 2.051518  |

ωB97XD energy = -1154.85241085 a.u.

(2R,6R,7S,8R)-1, Conf. B

|   |           |           |           |
|---|-----------|-----------|-----------|
| C | -4.443453 | -0.569528 | -0.392501 |
| C | -3.585842 | 0.659622  | -0.213652 |
| C | -2.808203 | 1.240208  | -1.134376 |
| C | -2.792725 | 0.852544  | -2.588815 |
| C | -2.328825 | -1.764571 | 0.363042  |
| C | -3.579113 | -1.862319 | -0.476292 |
| C | -0.388614 | 1.575421  | -0.540073 |
| C | -0.220536 | 0.708177  | 0.736655  |
| C | -0.002533 | -0.794974 | 0.464930  |
| C | -1.192254 | -1.380397 | -0.231966 |
| O | 0.609987  | 2.624562  | -0.454310 |
| C | 1.370741  | 2.533774  | 0.648132  |
| C | 0.933580  | 1.360943  | 1.448455  |
| O | 2.255363  | 3.325877  | 0.884081  |
| C | 1.538819  | 1.002890  | 2.578176  |
| C | -1.759451 | 2.245212  | -0.712182 |
| C | -2.502981 | -1.877588 | 1.852155  |
| O | -5.336100 | -0.725285 | 0.710323  |
| O | 1.150934  | -0.918313 | -0.392072 |
| C | 2.188025  | -1.672007 | 0.010275  |
| O | 2.221291  | -2.258392 | 1.073302  |
| C | 3.293321  | -1.696205 | -1.012551 |
| C | 4.602995  | -1.087142 | -0.476362 |
| C | 5.706816  | -1.243709 | -1.522648 |
| C | 4.413000  | 0.379564  | -0.085043 |
| H | -5.029665 | -0.508906 | -1.319053 |
| H | -3.495232 | 0.989747  | 0.822081  |
| H | -3.602483 | 0.169531  | -2.855211 |
| H | -1.847363 | 0.363101  | -2.855712 |
| H | -3.302432 | -2.005560 | -1.525459 |
| H | -4.217726 | -2.700701 | -0.177555 |
| H | -2.874903 | 1.743555  | -3.221798 |
| H | -1.127419 | 0.780022  | 1.346653  |
| H | 0.215025  | -1.293072 | 1.411623  |
| H | -1.175458 | -1.279942 | -1.316120 |
| H | 1.221821  | 0.133247  | 3.146552  |
| H | 2.379200  | 1.578196  | 2.956050  |
| H | -2.034062 | 2.729155  | 0.231586  |
| H | -0.131945 | 1.004867  | -1.436209 |
| H | -1.650388 | 3.027177  | -1.472055 |
| H | -3.027070 | -0.997139 | 2.244377  |
| H | -1.552945 | -1.975364 | 2.383374  |
| H | -3.125387 | -2.743477 | 2.100036  |
| H | -5.889365 | 0.062256  | 0.767331  |
| H | 3.458999  | -2.747115 | -1.274197 |
| H | 2.973282  | -1.163913 | -1.913076 |

|   |          |           |           |
|---|----------|-----------|-----------|
| H | 4.889831 | -1.651793 | 0.419405  |
| H | 6.653135 | -0.837211 | -1.150547 |
| H | 5.870123 | -2.296403 | -1.778033 |
| H | 5.451678 | -0.706563 | -2.444414 |
| H | 5.354345 | 0.814071  | 0.267018  |
| H | 3.680242 | 0.491577  | 0.720754  |
| H | 4.067775 | 0.973575  | -0.940153 |

ωB97XD energy = -1154.85159901 a.u.

(2R,6R,7S,8R)-1, Conf. C

|   |           |           |           |
|---|-----------|-----------|-----------|
| C | 4.445615  | -0.730459 | 0.310906  |
| C | 3.651207  | 0.540313  | 0.131414  |
| C | 2.946134  | 1.186152  | 1.066826  |
| C | 2.975995  | 0.838879  | 2.531141  |
| C | 2.247297  | -1.820974 | -0.352937 |
| C | 3.513201  | -1.969005 | 0.454705  |
| C | 0.526267  | 1.635539  | 0.555200  |
| C | 0.255034  | 0.771688  | -0.706069 |
| C | -0.018896 | -0.719023 | -0.418233 |
| C | 1.154078  | -1.351985 | 0.262452  |
| O | -0.421350 | 2.733449  | 0.508033  |
| C | -1.246363 | 2.667696  | -0.548580 |
| C | -0.905957 | 1.471605  | -1.361363 |
| O | -2.110176 | 3.494055  | -0.740528 |
| C | -1.591474 | 1.134733  | -2.451092 |
| C | 1.935021  | 2.236739  | 0.663680  |
| C | 2.373699  | -1.988100 | -1.841900 |
| O | 5.289576  | -0.960857 | -0.816855 |
| O | -1.170207 | -0.783257 | 0.447642  |
| C | -2.221826 | -1.528952 | 0.069404  |
| O | -2.251524 | -2.174558 | -0.958620 |
| C | -3.337887 | -1.476297 | 1.079901  |
| C | -4.709577 | -1.217528 | 0.436649  |
| C | -5.811245 | -1.353903 | 1.487922  |
| C | -4.754195 | 0.157247  | -0.233884 |
| H | 5.065816  | -0.682945 | 1.215820  |
| H | 3.533899  | 0.846272  | -0.908962 |
| H | 2.007453  | 0.443551  | 2.863350  |
| H | 3.170430  | 1.736369  | 3.129774  |
| H | 3.258341  | -2.067228 | 1.514544  |
| H | 4.093500  | -2.851162 | 0.163112  |
| H | 3.737402  | 0.094979  | 2.775865  |
| H | 1.132199  | 0.798588  | -1.362049 |
| H | -0.268454 | -1.213189 | -1.358374 |
| H | 1.176799  | -1.221956 | 1.343557  |
| H | -1.349218 | 0.248369  | -3.030503 |
| H | -2.422643 | 1.749152  | -2.785389 |
| H | 2.197890  | 2.691569  | -0.297664 |
| H | 0.281543  | 1.082104  | 1.465285  |
| H | 1.893940  | 3.034554  | 1.413468  |
| H | 2.946649  | -1.157668 | -2.272959 |
| H | 1.407412  | -2.038486 | -2.349856 |
| H | 2.930678  | -2.900939 | -2.076714 |
| H | 5.878546  | -0.203746 | -0.915108 |
| H | -3.343397 | -2.450515 | 1.584224  |
| H | -3.115223 | -0.713989 | 1.832463  |

|   |           |           |           |
|---|-----------|-----------|-----------|
| H | -4.865600 | -1.984326 | -0.331805 |
| H | -6.798378 | -1.213965 | 1.034766  |
| H | -5.794565 | -2.342002 | 1.960514  |
| H | -5.696499 | -0.599696 | 2.276418  |
| H | -5.732998 | 0.334967  | -0.691586 |
| H | -3.999498 | 0.248953  | -1.022834 |
| H | -4.573338 | 0.955543  | 0.496430  |

ωB97XD energy = -1154.85133029 a.u.

(2R,6R,7S,8R)-1, Conf. D

|   |           |           |           |
|---|-----------|-----------|-----------|
| C | 4.380219  | -0.261229 | 0.355892  |
| C | 3.425511  | 0.860541  | 0.025681  |
| C | 2.609696  | 1.499913  | 0.871001  |
| C | 2.635732  | 1.319124  | 2.364927  |
| C | 2.359102  | -1.699291 | -0.195516 |
| C | 3.624703  | -1.597891 | 0.619483  |
| C | 0.159389  | 1.584129  | 0.295873  |
| C | 0.024355  | 0.526429  | -0.833478 |
| C | -0.041106 | -0.940555 | -0.359546 |
| C | 1.207079  | -1.322734 | 0.373301  |
| O | -0.899699 | 2.551840  | 0.073546  |
| C | -1.690876 | 2.233696  | -0.963771 |
| C | -1.206446 | 0.971334  | -1.578018 |
| O | -2.634172 | 2.921339  | -1.284864 |
| C | -1.835495 | 0.387985  | -2.595495 |
| C | 1.485233  | 2.357635  | 0.335916  |
| C | 2.523503  | -1.995904 | -1.660087 |
| O | 5.280602  | -0.490482 | -0.727998 |
| O | -1.162200 | -1.079620 | 0.536886  |
| C | -2.139497 | -1.949958 | 0.225786  |
| O | -2.145536 | -2.612444 | -0.792169 |
| C | -3.206552 | -2.004006 | 1.289560  |
| C | -4.172433 | -0.794762 | 1.295773  |
| C | -3.531496 | 0.482669  | 1.839550  |
| C | -4.796189 | -0.560305 | -0.081296 |
| H | 4.961640  | -0.029834 | 1.258193  |
| H | 3.300692  | 1.034858  | -1.043626 |
| H | 3.471809  | 0.703179  | 2.703386  |
| H | 1.711576  | 0.846839  | 2.721545  |
| H | 3.375852  | -1.634287 | 1.684721  |
| H | 4.324160  | -2.413374 | 0.407059  |
| H | 2.704736  | 2.292121  | 2.865134  |
| H | 0.898530  | 0.588586  | -1.491723 |
| H | -0.218255 | -1.573425 | -1.230593 |
| H | 1.200571  | -1.085221 | 1.436003  |
| H | -1.484156 | -0.543927 | -3.028235 |
| H | -2.729393 | 0.838100  | -3.017882 |
| H | 1.709398  | 2.717012  | -0.674607 |
| H | -0.050133 | 1.138271  | 1.271937  |
| H | 1.333199  | 3.232515  | 0.977960  |
| H | 3.020236  | -1.158862 | -2.166499 |
| H | 1.573931  | -2.186658 | -2.166074 |
| H | 3.169712  | -2.868670 | -1.800932 |
| H | 5.774743  | 0.321469  | -0.889820 |
| H | -3.774207 | -2.919555 | 1.107713  |
| H | -2.719537 | -2.086041 | 2.266701  |

|   |           |           |           |
|---|-----------|-----------|-----------|
| H | -4.974680 | -1.081663 | 1.986957  |
| H | -2.740680 | 0.846970  | 1.178411  |
| H | -4.280638 | 1.276384  | 1.926622  |
| H | -3.090720 | 0.320545  | 2.829311  |
| H | -5.260502 | -1.471180 | -0.474297 |
| H | -4.042560 | -0.228596 | -0.805305 |
| H | -5.563880 | 0.218450  | -0.028485 |

ωB97XD energy = -1154.85102641 a.u.

(2R,6R,7S,8R)-1, Conf. E

|   |           |           |           |
|---|-----------|-----------|-----------|
| C | -4.039570 | -1.171154 | -0.370667 |
| C | -3.415430 | 0.185808  | -0.590668 |
| C | -2.589938 | 0.541226  | -1.581377 |
| C | -2.274345 | -0.329500 | -2.767907 |
| C | -1.921047 | -1.570477 | 0.973422  |
| C | -2.987986 | -2.209823 | 0.119982  |
| C | -0.374183 | 1.546081  | -0.940479 |
| C | -0.270574 | 1.248140  | 0.580791  |
| C | 0.183441  | -0.184939 | 0.927548  |
| C | -0.775579 | -1.199362 | 0.387697  |
| O | 0.423430  | 2.735471  | -1.176436 |
| C | 1.048548  | 3.173380  | -0.072800 |
| C | 0.690045  | 2.298300  | 1.073344  |
| O | 1.776725  | 4.140651  | -0.088854 |
| C | 1.210545  | 2.465241  | 2.286919  |
| C | -1.786776 | 1.818688  | -1.476496 |
| C | -2.316898 | -1.186449 | 2.371956  |
| O | -5.061837 | -1.098696 | 0.622806  |
| O | 1.475219  | -0.370115 | 0.318555  |
| C | 2.498474  | -0.802304 | 1.073395  |
| O | 2.391918  | -1.086617 | 2.249104  |
| C | 3.774601  | -0.860265 | 0.275474  |
| C | 3.661998  | -1.659086 | -1.034652 |
| C | 4.988028  | -1.600656 | -1.794303 |
| C | 3.241728  | -3.105568 | -0.766031 |
| H | -4.474438 | -1.560884 | -1.300449 |
| H | -3.548644 | 0.876353  | 0.243172  |
| H | -2.904792 | -1.220073 | -2.821626 |
| H | -1.229989 | -0.666004 | -2.742062 |
| H | -2.525403 | -2.654065 | -0.766705 |
| H | -3.530252 | -2.999741 | 0.651036  |
| H | -2.399418 | 0.233363  | -3.700038 |
| H | -1.252749 | 1.382964  | 1.047598  |
| H | 0.297411  | -0.262590 | 2.010206  |
| H | -0.595437 | -1.488074 | -0.646744 |
| H | 0.956246  | 1.809443  | 3.114717  |
| H | 1.915633  | 3.270043  | 2.474825  |
| H | -2.279204 | 2.540291  | -0.815566 |
| H | 0.105719  | 0.756424  | -1.524561 |
| H | -1.678525 | 2.285281  | -2.461995 |
| H | -1.470074 | -0.860001 | 2.980404  |
| H | -2.795765 | -2.032175 | 2.876570  |
| H | -3.059983 | -0.379656 | 2.351063  |
| H | -5.733438 | -0.475043 | 0.323357  |
| H | 4.058551  | 0.175730  | 0.053102  |
| H | 4.545090  | -1.289079 | 0.922517  |

|   |          |           |           |
|---|----------|-----------|-----------|
| H | 2.891284 | -1.183634 | -1.652746 |
| H | 4.912535 | -2.133505 | -2.748094 |
| H | 5.279245 | -0.566770 | -2.009385 |
| H | 5.794467 | -2.065703 | -1.214243 |
| H | 3.162102 | -3.666365 | -1.703281 |
| H | 2.269164 | -3.162342 | -0.263758 |
| H | 3.976531 | -3.613431 | -0.129586 |

ωB97XD energy = -1154.85066408 a.u.

(2R,6R,7S,8R)-1, Conf. F

|   |           |           |           |
|---|-----------|-----------|-----------|
| C | -3.914641 | -1.612357 | -0.233020 |
| C | -3.503703 | -0.170835 | -0.410231 |
| C | -2.832876 | 0.352929  | -1.442050 |
| C | -2.526140 | -0.396454 | -2.710482 |
| C | -1.648898 | -1.778475 | 0.908207  |
| C | -2.692754 | -2.516493 | 0.107304  |
| C | -0.723871 | 1.632406  | -0.925260 |
| C | -0.439629 | 1.264105  | 0.556369  |
| C | 0.230725  | -0.106367 | 0.775309  |
| C | -0.625497 | -1.216309 | 0.252155  |
| O | -0.136807 | 2.943394  | -1.136308 |
| C | 0.510968  | 3.407190  | -0.056100 |
| C | 0.401536  | 2.414168  | 1.043303  |
| O | 1.074098  | 4.479035  | -0.056643 |
| C | 1.010845  | 2.577747  | 2.215186  |
| C | -2.205269 | 1.723315  | -1.318987 |
| C | -1.961720 | -1.524426 | 2.357205  |
| O | -4.849993 | -1.740964 | 0.837463  |
| O | 1.486510  | -0.086170 | 0.067507  |
| C | 2.594060  | -0.471410 | 0.722480  |
| O | 2.593321  | -0.848866 | 1.877189  |
| C | 3.822580  | -0.398810 | -0.143877 |
| C | 4.417711  | -1.795458 | -0.408854 |
| C | 3.440266  | -2.676577 | -1.189630 |
| C | 5.749428  | -1.659071 | -1.146771 |
| H | -4.368229 | -2.009026 | -1.150913 |
| H | -3.645774 | 0.442255  | 0.480810  |
| H | -2.795945 | 0.207342  | -3.584723 |
| H | -3.056995 | -1.348526 | -2.778594 |
| H | -2.254914 | -2.850541 | -0.838449 |
| H | -3.076143 | -3.397916 | 0.632044  |
| H | -1.453207 | -0.609728 | -2.795738 |
| H | -1.386964 | 1.230631  | 1.106189  |
| H | 0.437624  | -0.220718 | 1.840514  |
| H | -0.503236 | -1.421749 | -0.810159 |
| H | 0.942233  | 1.835364  | 3.005415  |
| H | 1.600805  | 3.469766  | 2.405573  |
| H | -2.728583 | 2.328569  | -0.570661 |
| H | -0.188863 | 0.961917  | -1.603123 |
| H | -2.257359 | 2.253728  | -2.276338 |
| H | -2.761861 | -0.779402 | 2.451452  |
| H | -1.096768 | -1.169220 | 2.923089  |
| H | -2.332131 | -2.437424 | 2.833971  |
| H | -5.623791 | -1.204229 | 0.630821  |
| H | 3.584767  | 0.097558  | -1.089315 |
| H | 4.553782  | 0.214407  | 0.393300  |

|   |          |           |           |
|---|----------|-----------|-----------|
| H | 4.606895 | -2.264779 | 0.564335  |
| H | 3.871996 | -3.666763 | -1.368809 |
| H | 2.497703 | -2.820818 | -0.649698 |
| H | 3.206611 | -2.228224 | -2.163130 |
| H | 6.204604 | -2.641279 | -1.312489 |
| H | 6.459801 | -1.050649 | -0.576757 |
| H | 5.608197 | -1.184891 | -2.125816 |

ωB97XD energy = -1154.85050085 a.u.

(2R,6R,7S,8R)-1, Conf. G

|   |           |           |           |
|---|-----------|-----------|-----------|
| C | -4.383991 | -0.601519 | -0.227432 |
| C | -3.544598 | 0.630371  | 0.009493  |
| C | -2.857664 | 1.324158  | -0.905173 |
| C | -2.955705 | 1.084816  | -2.387718 |
| C | -2.200575 | -1.795252 | 0.293058  |
| C | -3.496443 | -1.856418 | -0.477895 |
| C | -0.406197 | 1.662594  | -0.454746 |
| C | -0.123803 | 0.705570  | 0.734242  |
| C | 0.104422  | -0.765987 | 0.336594  |
| C | -1.114590 | -1.322690 | -0.331616 |
| O | 0.578901  | 2.724270  | -0.364459 |
| C | 1.425123  | 2.567029  | 0.665541  |
| C | 1.066664  | 1.331184  | 1.408847  |
| O | 2.316391  | 3.354928  | 0.889995  |
| C | 1.761033  | 0.904114  | 2.460586  |
| C | -1.797716 | 2.312316  | -0.469253 |
| C | -2.280195 | -2.051132 | 1.772538  |
| O | -5.201821 | -0.879985 | 0.908947  |
| O | 1.213289  | -0.795008 | -0.583621 |
| C | 2.157403  | -1.739037 | -0.419382 |
| O | 2.136718  | -2.550404 | 0.484345  |
| C | 3.223349  | -1.655111 | -1.480795 |
| C | 4.486119  | -0.878711 | -1.035344 |
| C | 4.175516  | 0.579355  | -0.693622 |
| C | 5.216682  | -1.570258 | 0.117211  |
| H | -5.027764 | -0.476165 | -1.107820 |
| H | -3.376899 | 0.854099  | 1.063792  |
| H | -2.029642 | 0.643980  | -2.778644 |
| H | -3.100713 | 2.033428  | -2.917267 |
| H | -3.280397 | -1.899686 | -1.549887 |
| H | -4.094645 | -2.736568 | -0.217901 |
| H | -3.776753 | 0.415662  | -2.654943 |
| H | -0.983370 | 0.704025  | 1.412745  |
| H | 0.382014  | -1.329468 | 1.229340  |
| H | -1.169721 | -1.127376 | -1.401734 |
| H | 1.500071  | -0.010063 | 2.986291  |
| H | 2.619205  | 1.467223  | 2.816337  |
| H | -2.010719 | 2.707300  | 0.530132  |
| H | -0.211273 | 1.167857  | -1.409533 |
| H | -1.757420 | 3.158714  | -1.163828 |
| H | -2.855622 | -2.961225 | 1.970683  |
| H | -2.811152 | -1.233454 | 2.276105  |
| H | -1.298341 | -2.161132 | 2.239840  |
| H | -5.769045 | -0.116903 | 1.069294  |
| H | 3.502735  | -2.682568 | -1.731480 |
| H | 2.800417  | -1.180286 | -2.369966 |



|   |          |           |           |
|---|----------|-----------|-----------|
| H | 5.148211 | -0.891481 | -1.910152 |
| H | 3.574775 | 0.647137  | 0.219297  |
| H | 5.100774 | 1.138179  | -0.519235 |
| H | 3.626588 | 1.079234  | -1.498854 |
| H | 5.433659 | -2.618280 | -0.115482 |
| H | 4.621913 | -1.549908 | 1.037190  |
| H | 6.166271 | -1.065027 | 0.323208  |

ωB97XD energy = -1154.85037625 a.u.

(2R,6R,7S,8R)-1, Conf. H

|   |           |           |           |
|---|-----------|-----------|-----------|
| C | -4.207732 | -1.359030 | -0.324304 |
| C | -3.679977 | 0.054578  | -0.282708 |
| C | -3.036972 | 0.700950  | -1.261521 |
| C | -2.884658 | 0.169417  | -2.661375 |
| C | -1.895935 | -1.901250 | 0.582336  |
| C | -3.052612 | -2.400577 | -0.248053 |
| C | -0.787754 | 1.683153  | -0.712421 |
| C | -0.438026 | 1.047107  | 0.660688  |
| C | 0.121832  | -0.389337 | 0.584819  |
| C | -0.867576 | -1.317781 | -0.046682 |
| O | -0.080496 | 2.949440  | -0.766783 |
| C | 0.687608  | 3.166016  | 0.311769  |
| C | 0.541070  | 2.026565  | 1.253722  |
| O | 1.367443  | 4.161662  | 0.425705  |
| C | 1.226808  | 1.949337  | 2.391756  |
| C | -2.275715 | 1.971723  | -0.957337 |
| C | -2.094184 | -1.886572 | 2.072395  |
| O | -5.076750 | -1.605088 | 0.781114  |
| O | 1.314389  | -0.346264 | -0.224232 |
| C | 2.489316  | -0.696439 | 0.329123  |
| O | 2.598208  | -1.122523 | 1.459813  |
| C | 3.628624  | -0.444715 | -0.624950 |
| C | 4.866771  | -1.307414 | -0.362508 |
| C | 4.581872  | -2.783757 | -0.648910 |
| C | 6.041893  | -0.805324 | -1.203259 |
| H | -4.755624 | -1.547411 | -1.256761 |
| H | -3.705924 | 0.509297  | 0.708305  |
| H | -3.208568 | 0.921196  | -3.390401 |
| H | -3.458567 | -0.743396 | -2.834802 |
| H | -2.710972 | -2.588796 | -1.270573 |
| H | -3.477615 | -3.330579 | 0.144747  |
| H | -1.833649 | -0.052924 | -2.885776 |
| H | -1.342538 | 0.994001  | 1.277108  |
| H | 0.399093  | -0.704579 | 1.592096  |
| H | -0.835768 | -1.343970 | -1.135040 |
| H | 1.125449  | 1.103881  | 3.065892  |
| H | 1.917267  | 2.740213  | 2.670778  |
| H | -2.685311 | 2.474038  | -0.074124 |
| H | -0.377110 | 1.088296  | -1.532381 |
| H | -2.339782 | 2.668683  | -1.800475 |
| H | -2.857933 | -1.149069 | 2.348791  |
| H | -1.179079 | -1.655367 | 2.623189  |
| H | -2.465386 | -2.857422 | 2.417154  |
| H | -5.822525 | -0.996741 | 0.722645  |
| H | 3.267872  | -0.574537 | -1.651110 |
| H | 3.873521  | 0.620524  | -0.513780 |

|   |          |           |           |
|---|----------|-----------|-----------|
| H | 5.127229 | -1.203932 | 0.697353  |
| H | 5.460217 | -3.399352 | -0.427122 |
| H | 3.750826 | -3.161283 | -0.044437 |
| H | 4.329125 | -2.931270 | -1.706479 |
| H | 6.943258 | -1.394585 | -1.004202 |
| H | 6.271240 | 0.243730  | -0.986109 |
| H | 5.820988 | -0.886348 | -2.274896 |

ωB97XD energy = -1154.84993550 a.u.

(2R,6R,7S,8R)-1, Conf. I

|   |           |           |           |
|---|-----------|-----------|-----------|
| C | 3.782012  | -1.632179 | 0.107166  |
| C | 3.404032  | -0.182665 | 0.291316  |
| C | 2.784333  | 0.360614  | 1.344943  |
| C | 2.509248  | -0.374898 | 2.628622  |
| C | 1.476628  | -1.758527 | -0.958818 |
| C | 2.533810  | -2.514366 | -0.192292 |
| C | 0.682644  | 1.671569  | 0.893928  |
| C | 0.342675  | 1.303728  | -0.576042 |
| C | -0.369898 | -0.051242 | -0.756164 |
| C | 0.488192  | -1.176838 | -0.267601 |
| O | 0.117409  | 2.989016  | 1.123372  |
| C | -0.555142 | 3.462195  | 0.062551  |
| C | -0.486804 | 2.470766  | -1.041674 |
| O | -1.105906 | 4.540367  | 0.080857  |
| C | -1.113226 | 2.649722  | -2.202209 |
| C | 2.177836  | 1.741983  | 1.235811  |
| C | 1.742686  | -1.512196 | -2.418187 |
| O | 4.681594  | -1.781924 | -0.990933 |
| O | -1.580285 | -0.000047 | 0.021836  |
| C | -2.734221 | -0.387826 | -0.549119 |
| O | -2.821608 | -0.741360 | -1.707868 |
| C | -3.872829 | -0.353868 | 0.435060  |
| C | -4.130541 | -1.731432 | 1.094423  |
| C | -4.646719 | -2.763744 | 0.090689  |
| C | -2.900744 | -2.253865 | 1.841359  |
| H | 4.255803  | -2.034710 | 1.012274  |
| H | 3.522263  | 0.422631  | -0.608431 |
| H | 3.032796  | -1.331545 | 2.689111  |
| H | 1.437113  | -0.577057 | 2.746773  |
| H | 2.121305  | -2.839190 | 0.767991  |
| H | 2.883856  | -3.403021 | -0.728076 |
| H | 2.810126  | 0.233425  | 3.489357  |
| H | 1.269941  | 1.242779  | -1.156560 |
| H | -0.638466 | -0.165313 | -1.807969 |
| H | 0.402005  | -1.379394 | 0.798759  |
| H | -1.070527 | 1.908868  | -2.995601 |
| H | -1.690498 | 3.552549  | -2.379925 |
| H | 2.685383  | 2.333702  | 0.466032  |
| H | 0.164026  | 1.008158  | 1.590951  |
| H | 2.272373  | 2.275754  | 2.188070  |
| H | 2.062654  | -2.436288 | -2.910070 |
| H | 2.564442  | -0.795342 | -2.541679 |
| H | 0.869529  | -1.125044 | -2.949423 |
| H | 5.470242  | -1.257146 | -0.811370 |
| H | -3.650416 | 0.385232  | 1.208989  |
| H | -4.768071 | -0.037968 | -0.107234 |

|   |           |           |           |
|---|-----------|-----------|-----------|
| H | -4.922466 | -1.552211 | 1.832000  |
| H | -3.891108 | -2.995987 | -0.667327 |
| H | -4.906257 | -3.696626 | 0.602457  |
| H | -5.540667 | -2.402366 | -0.428414 |
| H | -2.512502 | -1.512061 | 2.547654  |
| H | -2.093454 | -2.513293 | 1.146260  |
| H | -3.152900 | -3.158543 | 2.404723  |

ωB97XD energy = -1154.84941384 a.u.

(2R,6R,7S,8S)-1, Conf. A

|   |           |           |           |
|---|-----------|-----------|-----------|
| C | 4.218595  | -1.520843 | -0.349823 |
| C | 3.651070  | -0.219250 | -0.838544 |
| C | 3.524459  | 0.913088  | -0.134386 |
| C | 4.194450  | 1.205603  | 1.183108  |
| C | 1.868009  | -1.896765 | 0.493125  |
| C | 3.062988  | -2.541948 | -0.172806 |
| C | 1.183651  | 1.692621  | 0.166360  |
| C | 0.098101  | 0.893517  | -0.614058 |
| C | -0.202462 | -0.469417 | 0.073235  |
| C | 0.876909  | -1.441643 | -0.282866 |
| O | 0.579959  | 2.963123  | 0.519729  |
| C | -0.688359 | 3.075944  | 0.097198  |
| C | -1.058608 | 1.856477  | -0.667259 |
| O | -1.355416 | 4.059762  | 0.326034  |
| C | -2.216291 | 1.768563  | -1.320373 |
| C | 2.516911  | 1.959286  | -0.561364 |
| C | 1.985169  | -1.669924 | 1.973510  |
| O | 5.127070  | -2.116730 | -1.275297 |
| O | -1.445769 | -0.981536 | -0.446493 |
| C | -2.491591 | -1.096319 | 0.391159  |
| O | -2.448933 | -0.792250 | 1.565360  |
| C | -3.687790 | -1.693235 | -0.304888 |
| C | -5.032411 | -1.203539 | 0.245551  |
| C | -5.224541 | 0.293505  | -0.007070 |
| C | -6.173657 | -2.014576 | -0.370283 |
| H | 4.720539  | -1.385081 | 0.614628  |
| H | 3.123831  | -0.292696 | -1.790741 |
| H | 4.770585  | 2.134602  | 1.096143  |
| H | 4.875419  | 0.418894  | 1.512300  |
| H | 3.437827  | -3.397244 | 0.399518  |
| H | 2.792169  | -2.896758 | -1.172855 |
| H | 3.458153  | 1.373197  | 1.978719  |
| H | 0.446926  | 0.683567  | -1.630340 |
| H | -0.317352 | -0.321031 | 1.147237  |
| H | 0.919956  | -1.662212 | -1.349813 |
| H | -2.468112 | 0.903329  | -1.924003 |
| H | -2.936700 | 2.579730  | -1.262997 |
| H | 2.361461  | 1.956956  | -1.644793 |
| H | 1.387746  | 1.201693  | 1.122475  |
| H | 2.855766  | 2.959368  | -0.271817 |
| H | 1.089856  | -1.227885 | 2.415603  |
| H | 2.836957  | -1.016683 | 2.197989  |
| H | 2.176769  | -2.622346 | 2.480940  |
| H | 5.870121  | -1.514940 | -1.398263 |
| H | -3.610210 | -1.501786 | -1.380379 |

|   |           |           |           |
|---|-----------|-----------|-----------|
| H | -3.597863 | -2.779561 | -0.170454 |
| H | -5.030761 | -1.372592 | 1.328711  |
| H | -6.179808 | 0.637663  | 0.403143  |
| H | -4.432248 | 0.887466  | 0.460309  |
| H | -5.226063 | 0.509224  | -1.083100 |
| H | -7.139331 | -1.696008 | 0.036102  |
| H | -6.059575 | -3.085123 | -0.167504 |
| H | -6.208963 | -1.879560 | -1.458576 |

ωB97XD energy = -1154.84705266 a.u.

(2R,6R,7S,8S)-1, Conf. B

|   |           |           |           |
|---|-----------|-----------|-----------|
| C | 4.061498  | -1.650582 | -0.335071 |
| C | 3.587913  | -0.308344 | -0.813390 |
| C | 3.516983  | 0.819046  | -0.094002 |
| C | 4.180134  | 1.051806  | 1.238768  |
| C | 1.674246  | -1.881945 | 0.452890  |
| C | 2.837410  | -2.595101 | -0.199966 |
| C | 1.224188  | 1.746914  | 0.178191  |
| C | 0.092918  | 1.042056  | -0.629805 |
| C | -0.295320 | -0.317940 | 0.006763  |
| C | 0.737106  | -1.345093 | -0.336997 |
| O | 0.710831  | 3.053521  | 0.545002  |
| C | -0.549810 | 3.255413  | 0.134245  |
| C | -1.006680 | 2.073460  | -0.640265 |
| O | -1.149364 | 4.277663  | 0.382894  |
| C | -2.187814 | 2.063773  | -1.256170 |
| C | 2.585303  | 1.932340  | -0.523862 |
| C | 1.773912  | -1.683089 | 1.937851  |
| O | 4.949204  | -2.289682 | -1.251638 |
| O | -1.557089 | -0.706782 | -0.574676 |
| C | -2.405832 | -1.408805 | 0.191798  |
| O | -2.153092 | -1.747346 | 1.330495  |
| C | -3.700150 | -1.707557 | -0.519165 |
| C | -4.921366 | -1.230072 | 0.286834  |
| C | -4.915609 | 0.291728  | 0.451207  |
| C | -6.210406 | -1.705439 | -0.383351 |
| H | 4.549661  | -1.563080 | 0.641858  |
| H | 3.074712  | -0.334792 | -1.775525 |
| H | 4.766594  | 0.201401  | 1.590586  |
| H | 3.445789  | 1.302152  | 2.013737  |
| H | 3.141470  | -3.483293 | 0.364444  |
| H | 2.564661  | -2.913958 | -1.211506 |
| H | 4.853746  | 1.914075  | 1.162266  |
| H | 0.429096  | 0.851261  | -1.654448 |
| H | -0.439573 | -0.193531 | 1.081528  |
| H | 0.791591  | -1.547282 | -1.407119 |
| H | -2.510498 | 1.223625  | -1.859907 |
| H | -2.853895 | 2.917112  | -1.162141 |
| H | 2.448619  | 1.954203  | -1.609556 |
| H | 1.378330  | 1.228169  | 1.129280  |
| H | 2.983630  | 2.904285  | -0.214628 |
| H | 1.900142  | -2.651444 | 2.435436  |
| H | 0.897497  | -1.195900 | 2.369487  |
| H | 2.658470  | -1.083670 | 2.185442  |
| H | 5.735280  | -1.739187 | -1.343260 |
| H | -3.691579 | -1.247743 | -1.511986 |

|   |           |           |           |
|---|-----------|-----------|-----------|
| H | -3.747310 | -2.794752 | -0.651730 |
| H | -4.858194 | -1.687454 | 1.281527  |
| H | -5.768510 | 0.619314  | 1.054858  |
| H | -4.005989 | 0.649006  | 0.947005  |
| H | -4.986413 | 0.789448  | -0.523956 |
| H | -7.086075 | -1.401061 | 0.199813  |
| H | -6.233274 | -2.796317 | -0.479966 |
| H | -6.313638 | -1.274983 | -1.387188 |

ωB97XD energy = -1154.84689976 a.u.

(2R,6R,7S,8S)-1, Conf. C

|   |           |           |           |
|---|-----------|-----------|-----------|
| C | 2.410286  | -3.036034 | -0.327232 |
| C | 2.763324  | -1.627687 | -0.738796 |
| C | 3.318662  | -0.687355 | 0.032983  |
| C | 3.869926  | -0.952586 | 1.408581  |
| C | 0.222792  | -1.898462 | 0.291709  |
| C | 1.146528  | -3.056100 | 0.588186  |
| C | 2.094901  | 1.483977  | 0.311216  |
| C | 0.674683  | 1.220369  | -0.269684 |
| C | -0.241634 | 0.563098  | 0.791517  |
| C | 0.251399  | -0.829267 | 1.099934  |
| O | 2.321393  | 2.912659  | 0.207088  |
| C | 1.294853  | 3.563887  | -0.361419 |
| C | 0.236140  | 2.586463  | -0.726027 |
| O | 1.309118  | 4.763351  | -0.525553 |
| C | -0.859308 | 2.956526  | -1.387538 |
| C | 3.260100  | 0.765134  | -0.384893 |
| C | -0.529519 | -1.989071 | -1.007986 |
| O | 2.125076  | -3.842595 | -1.470553 |
| O | -1.583822 | 0.590456  | 0.277242  |
| C | -2.584475 | 0.518175  | 1.170358  |
| O | -2.401176 | 0.448585  | 2.368538  |
| C | -3.929287 | 0.543263  | 0.493352  |
| C | -4.136718 | -0.615068 | -0.500080 |
| C | -3.976532 | -1.970551 | 0.190819  |
| C | -5.511806 | -0.490681 | -1.157101 |
| H | 3.230152  | -3.499330 | 0.236956  |
| H | 2.358664  | -1.329837 | -1.706491 |
| H | 4.018700  | -2.017351 | 1.602630  |
| H | 3.197570  | -0.568507 | 2.185975  |
| H | 1.483556  | -2.998672 | 1.627472  |
| H | 0.657150  | -4.025758 | 0.444413  |
| H | 4.831378  | -0.444356 | 1.541875  |
| H | 0.743420  | 0.539195  | -1.123275 |
| H | -0.224433 | 1.169620  | 1.701671  |
| H | 0.841726  | -0.893995 | 2.011739  |
| H | -1.616412 | 2.238952  | -1.683433 |
| H | -1.010131 | 4.001370  | -1.645141 |
| H | 3.141296  | 0.862737  | -1.469471 |
| H | 2.118779  | 1.271167  | 1.383368  |
| H | 4.180819  | 1.285255  | -0.098087 |
| H | -1.079345 | -1.079961 | -1.249871 |
| H | -1.246462 | -2.817567 | -0.963931 |
| H | 0.157621  | -2.225587 | -1.827589 |
| H | 2.911451  | -3.866346 | -2.027994 |
| H | -4.690768 | 0.510130  | 1.277605  |

|   |           |           |           |
|---|-----------|-----------|-----------|
| H | -4.022741 | 1.501711  | -0.030914 |
| H | -3.371430 | -0.531182 | -1.281309 |
| H | -2.987494 | -2.084376 | 0.648528  |
| H | -4.726040 | -2.092029 | 0.982339  |
| H | -4.107402 | -2.788072 | -0.525909 |
| H | -6.309229 | -0.566827 | -0.407916 |
| H | -5.665762 | -1.287607 | -1.892314 |
| H | -5.625232 | 0.469384  | -1.672395 |

ωB97XD energy = -1154.84677159 a.u.

(2R,6R,7S,8S)-1, Conf. D

|   |           |           |           |
|---|-----------|-----------|-----------|
| C | 3.970446  | -1.657297 | -0.433766 |
| C | 3.457743  | -0.357392 | -0.980641 |
| C | 3.441209  | 0.825035  | -0.352495 |
| C | 4.226920  | 1.173002  | 0.885186  |
| C | 1.655173  | -1.805516 | 0.577698  |
| C | 2.756300  | -2.572215 | -0.121624 |
| C | 1.180899  | 1.767729  | 0.084056  |
| C | -0.052549 | 1.047219  | -0.543810 |
| C | -0.358913 | -0.273209 | 0.206411  |
| C | 0.657783  | -1.309322 | -0.163499 |
| O | 0.737322  | 3.100708  | 0.444507  |
| C | -0.563424 | 3.305257  | 0.191886  |
| C | -1.131265 | 2.097098  | -0.459614 |
| O | -1.113938 | 4.348761  | 0.464614  |
| C | -2.378707 | 2.088049  | -0.925091 |
| C | 2.453672  | 1.888841  | -0.781485 |
| C | 1.872098  | -1.523929 | 2.036772  |
| O | 4.777515  | -2.380288 | -1.362021 |
| O | -1.658985 | -0.730887 | -0.229583 |
| C | -2.335707 | -1.527649 | 0.616111  |
| O | -1.942039 | -1.794077 | 1.733695  |
| C | -3.610680 | -2.057238 | 0.011603  |
| C | -4.554682 | -0.982082 | -0.551737 |
| C | -5.820224 | -1.642599 | -1.100021 |
| C | -4.894181 | 0.068926  | 0.506408  |
| H | 4.536285  | -1.494851 | 0.490654  |
| H | 2.857589  | -0.463943 | -1.885398 |
| H | 4.878874  | 0.368344  | 1.229586  |
| H | 3.568569  | 1.457433  | 1.714945  |
| H | 3.103728  | -3.421067 | 0.477115  |
| H | 2.392606  | -2.960758 | -1.078903 |
| H | 4.855448  | 2.047432  | 0.677642  |
| H | 0.146984  | 0.805415  | -1.593146 |
| H | -0.406536 | -0.082271 | 1.280175  |
| H | 0.623785  | -1.572935 | -1.220990 |
| H | -2.786615 | 1.231954  | -1.447967 |
| H | -3.013908 | 2.958548  | -0.786482 |
| H | 2.201293  | 1.801385  | -1.842616 |
| H | 1.436837  | 1.289800  | 1.034149  |
| H | 2.869120  | 2.888433  | -0.616420 |
| H | 2.030121  | -2.464214 | 2.576863  |
| H | 1.034588  | -1.003639 | 2.505197  |
| H | 2.777418  | -0.921304 | 2.180140  |
| H | 5.552680  | -1.844846 | -1.566242 |
| H | -3.327101 | -2.755581 | -0.785314 |

|   |           |           |           |
|---|-----------|-----------|-----------|
| H | -4.116129 | -2.630495 | 0.794218  |
| H | -4.044110 | -0.488739 | -1.387187 |
| H | -6.490575 | -0.895384 | -1.537671 |
| H | -5.582931 | -2.379127 | -1.875332 |
| H | -6.368889 | -2.157252 | -0.301739 |
| H | -5.557437 | 0.836994  | 0.094667  |
| H | -3.998422 | 0.573553  | 0.885433  |
| H | -5.403738 | -0.392884 | 1.360837  |

ωB97XD energy = -1154.84653295 a.u.

(2R,6R,7S,8S)-1, Conf. E

|   |           |           |           |
|---|-----------|-----------|-----------|
| C | 2.982054  | -2.693231 | -0.328690 |
| C | 3.017341  | -1.312834 | -0.917692 |
| C | 3.464749  | -0.199530 | -0.323100 |
| C | 4.318613  | -0.153384 | 0.917160  |
| C | 0.804152  | -1.898240 | 0.677819  |
| C | 1.509423  | -3.054150 | 0.003762  |
| C | 1.775750  | 1.599873  | 0.043485  |
| C | 0.356170  | 1.365286  | -0.555936 |
| C | -0.428529 | 0.300452  | 0.250444  |
| C | 0.083775  | -1.066293 | -0.083276 |
| O | 1.886761  | 3.026483  | 0.282778  |
| C | 0.760148  | 3.694722  | -0.003569 |
| C | -0.247918 | 2.747268  | -0.546174 |
| O | 0.661924  | 4.889318  | 0.167941  |
| C | -1.433317 | 3.176810  | -0.976635 |
| C | 2.988227  | 1.155455  | -0.801295 |
| C | 1.120092  | -1.688242 | 2.130632  |
| O | 3.437142  | -3.700580 | -1.230923 |
| O | -1.806738 | 0.386486  | -0.168140 |
| C | -2.752209 | 0.072486  | 0.731448  |
| O | -2.507362 | -0.231358 | 1.881794  |
| C | -4.134394 | 0.121835  | 0.138003  |
| C | -4.750743 | -1.286503 | 0.011378  |
| C | -6.174562 | -1.175785 | -0.534252 |
| C | -3.887862 | -2.196648 | -0.865767 |
| H | 3.571636  | -2.738131 | 0.593992  |
| H | 2.428250  | -1.204838 | -1.829588 |
| H | 5.240675  | 0.399340  | 0.700001  |
| H | 4.600908  | -1.139923 | 1.288730  |
| H | 1.503419  | -3.954971 | 0.627127  |
| H | 1.015852  | -3.295173 | -0.943710 |
| H | 3.820152  | 0.385350  | 1.732001  |
| H | 0.443340  | 1.010470  | -1.588738 |
| H | -0.376936 | 0.531136  | 1.316091  |
| H | -0.059945 | -1.324295 | -1.132817 |
| H | -2.165789 | 2.504624  | -1.407555 |
| H | -1.681566 | 4.232009  | -0.900007 |
| H | 2.721521  | 1.139018  | -1.862636 |
| H | 1.836075  | 1.139503  | 1.034327  |
| H | 3.772397  | 1.907426  | -0.663269 |
| H | 0.570609  | -0.857402 | 2.576974  |
| H | 2.192597  | -1.505131 | 2.269340  |
| H | 0.880423  | -2.595428 | 2.697118  |
| H | 4.360729  | -3.521454 | -1.441112 |
| H | -4.753078 | 0.735572  | 0.800506  |

|   |           |           |           |
|---|-----------|-----------|-----------|
| H | -4.096558 | 0.600581  | -0.845048 |
| H | -4.797431 | -1.719807 | 1.017965  |
| H | -6.645246 | -2.162423 | -0.598588 |
| H | -6.800580 | -0.545450 | 0.106821  |
| H | -6.174390 | -0.739192 | -1.540627 |
| H | -4.354876 | -3.180786 | -0.977360 |
| H | -2.891600 | -2.351536 | -0.436525 |
| H | -3.760164 | -1.767956 | -1.867483 |

ωB97XD energy = -1154.84641382 a.u.

(2R,6R,7S,8S)-1, Conf. F

|   |           |           |           |
|---|-----------|-----------|-----------|
| C | 3.043201  | -2.571027 | -0.376532 |
| C | 2.962839  | -1.204639 | -0.993533 |
| C | 3.418164  | -0.060128 | -0.468027 |
| C | 4.380130  | 0.053735  | 0.685469  |
| C | 0.910834  | -1.852406 | 0.774826  |
| C | 1.623016  | -2.994841 | 0.084965  |
| C | 1.662134  | 1.641054  | -0.002869 |
| C | 0.225269  | 1.326543  | -0.517196 |
| C | -0.470614 | 0.261503  | 0.367131  |
| C | 0.082009  | -1.093307 | 0.048718  |
| O | 1.705155  | 3.070460  | 0.239511  |
| C | 0.537461  | 3.679988  | -0.012521 |
| C | -0.438177 | 2.680155  | -0.519073 |
| O | 0.384207  | 4.868826  | 0.158169  |
| C | -1.651046 | 3.044578  | -0.932259 |
| C | 2.840400  | 1.262409  | -0.924924 |
| C | 1.340724  | -1.557301 | 2.183236  |
| O | 3.471402  | -3.576397 | -1.294587 |
| O | -1.868409 | 0.271432  | 0.015611  |
| C | -2.759383 | -0.042457 | 0.969966  |
| O | -2.455519 | -0.240117 | 2.128839  |
| C | -4.155176 | -0.119460 | 0.410543  |
| C | -4.304561 | -1.179533 | -0.698375 |
| C | -3.864674 | -2.560566 | -0.207401 |
| C | -5.749593 | -1.203717 | -1.197394 |
| H | 3.710517  | -2.566177 | 0.492665  |
| H | 2.287949  | -1.142970 | -1.848523 |
| H | 4.720608  | -0.909440 | 1.069288  |
| H | 3.942304  | 0.616254  | 1.518797  |
| H | 1.713309  | -3.870847 | 0.736198  |
| H | 1.070785  | -3.294928 | -0.812101 |
| H | 5.264083  | 0.617701  | 0.363665  |
| H | 0.272494  | 0.935225  | -1.538869 |
| H | -0.373765 | 0.532975  | 1.419923  |
| H | -0.134154 | -1.403335 | -0.974105 |
| H | -2.357384 | 2.329903  | -1.338803 |
| H | -1.950330 | 4.087325  | -0.868401 |
| H | 2.505326  | 1.221759  | -1.966040 |
| H | 1.809439  | 1.181699  | 0.979605  |
| H | 3.589820  | 2.056578  | -0.843317 |
| H | 2.386517  | -1.226442 | 2.204159  |
| H | 1.285162  | -2.468427 | 2.789230  |
| H | 0.729896  | -0.792506 | 2.667208  |
| H | 4.364917  | -3.359043 | -1.584085 |
| H | -4.828434 | -0.344492 | 1.242450  |

|   |           |           |           |
|---|-----------|-----------|-----------|
| H | -4.419241 | 0.868607  | 0.015739  |
| H | -3.654944 | -0.886912 | -1.532293 |
| H | -3.989489 | -3.310407 | -0.995794 |
| H | -2.810428 | -2.571694 | 0.092828  |
| H | -4.461672 | -2.875889 | 0.657061  |
| H | -5.867410 | -1.928060 | -2.010291 |
| H | -6.061503 | -0.222810 | -1.572769 |
| H | -6.436814 | -1.490795 | -0.392258 |

ωB97XD energy = -1154.84633108 a.u.

(2R,6R,7S,8S)-1, Conf. G

|   |           |           |           |
|---|-----------|-----------|-----------|
| C | 3.512953  | -2.289597 | -0.349886 |
| C | 3.345812  | -0.877941 | -0.832788 |
| C | 3.565334  | 0.240660  | -0.130017 |
| C | 4.308064  | 0.323843  | 1.178022  |
| C | 1.154128  | -1.966246 | 0.495030  |
| C | 2.111374  | -2.931612 | -0.167967 |
| C | 1.550307  | 1.668844  | 0.171312  |
| C | 0.283176  | 1.221409  | -0.616293 |
| C | -0.405053 | 0.005245  | 0.066180  |
| C | 0.343977  | -1.240800 | -0.285140 |
| O | 1.341796  | 3.060440  | 0.523157  |
| C | 0.165727  | 3.539922  | 0.091691  |
| C | -0.545105 | 2.478472  | -0.668592 |
| O | -0.182502 | 4.678182  | 0.311305  |
| C | -1.685125 | 2.730493  | -1.310103 |
| C | 2.906876  | 1.537656  | -0.550328 |
| C | 1.327712  | -1.777868 | 1.975541  |
| O | 4.204919  | -3.120154 | -1.282086 |
| O | -1.738972 | -0.127453 | -0.463837 |
| C | -2.778965 | 0.054792  | 0.367079  |
| O | -2.661268 | 0.334903  | 1.543197  |
| C | -4.098572 | -0.157258 | -0.325738 |
| C | -4.855057 | -1.369208 | 0.252809  |
| C | -6.226506 | -1.489883 | -0.412165 |
| C | -4.046490 | -2.658476 | 0.089499  |
| H | 4.038271  | -2.309733 | 0.611266  |
| H | 2.810346  | -0.790705 | -1.779191 |
| H | 5.149809  | 1.018662  | 1.071318  |
| H | 4.704101  | -0.633997 | 1.519825  |
| H | 2.222979  | -3.858447 | 0.404900  |
| H | 1.747826  | -3.193926 | -1.167146 |
| H | 3.672095  | 0.731302  | 1.973177  |
| H | 0.559474  | 0.919974  | -1.631811 |
| H | -0.479710 | 0.181222  | 1.139583  |
| H | 0.321810  | -1.465928 | -1.351633 |
| H | -2.184783 | 1.978896  | -1.911476 |
| H | -2.136813 | 3.716300  | -1.241698 |
| H | 2.762753  | 1.590134  | -1.633972 |
| H | 1.597007  | 1.139877  | 1.127983  |
| H | 3.521800  | 2.393001  | -0.251500 |
| H | 0.582604  | -1.112865 | 2.417318  |
| H | 2.322534  | -1.373208 | 2.197777  |
| H | 1.260090  | -2.746108 | 2.484337  |
| H | 5.094132  | -2.765813 | -1.396789 |
| H | -4.689743 | 0.752291  | -0.175526 |

|   |           |           |           |
|---|-----------|-----------|-----------|
| H | -3.935650 | -0.293343 | -1.399035 |
| H | -5.003547 | -1.184983 | 1.323693  |
| H | -6.793757 | -2.321706 | 0.018248  |
| H | -6.815420 | -0.575716 | -0.281276 |
| H | -6.124083 | -1.675699 | -1.488424 |
| H | -4.595914 | -3.514263 | 0.495115  |
| H | -3.084469 | -2.608403 | 0.611788  |
| H | -3.842941 | -2.858837 | -0.969603 |

ωB97XD energy = -1154.84617687 a.u.

(2R,6R,7S,8S)-1, Conf. H

|   |           |           |           |
|---|-----------|-----------|-----------|
| C | 3.575768  | -2.020130 | -0.452058 |
| C | 3.278042  | -0.590451 | -0.831263 |
| C | 3.452958  | 0.492098  | -0.065868 |
| C | 4.171593  | 0.476687  | 1.256818  |
| C | 1.148935  | -1.937294 | 0.302446  |
| C | 2.498178  | -2.578533 | 0.528655  |
| C | 1.439565  | 1.932614  | 0.337208  |
| C | 0.239162  | 1.113570  | -0.222327 |
| C | -0.283039 | 0.112302  | 0.836217  |
| C | 0.778114  | -0.927263 | 1.101328  |
| O | 1.040728  | 3.326165  | 0.298535  |
| C | -0.181684 | 3.503011  | -0.226260 |
| C | -0.736672 | 2.184679  | -0.629656 |
| O | -0.681292 | 4.600677  | -0.333105 |
| C | -1.888320 | 2.088021  | -1.291164 |
| C | 2.766531  | 1.792044  | -0.423223 |
| C | 0.417775  | -2.397449 | -0.930944 |
| O | 3.584283  | -2.860571 | -1.606653 |
| O | -1.505737 | -0.453517 | 0.335805  |
| C | -2.309485 | -1.050373 | 1.231122  |
| O | -2.092975 | -1.040735 | 2.425870  |
| C | -3.463870 | -1.760870 | 0.573312  |
| C | -4.171596 | -0.986195 | -0.547814 |
| C | -5.275424 | -1.853576 | -1.154999 |
| C | -4.733106 | 0.341498  | -0.035893 |
| H | 4.548094  | -2.101815 | 0.050477  |
| H | 2.710991  | -0.483945 | -1.756866 |
| H | 4.705436  | -0.459023 | 1.436428  |
| H | 3.471471  | 0.621545  | 2.089640  |
| H | 2.836488  | -2.374395 | 1.548862  |
| H | 2.468422  | -3.665482 | 0.393377  |
| H | 4.896161  | 1.297434  | 1.306300  |
| H | 0.560181  | 0.537678  | -1.096035 |
| H | -0.516091 | 0.652892  | 1.758243  |
| H | 1.410780  | -0.696630 | 1.956398  |
| H | -2.276747 | 1.133689  | -1.627127 |
| H | -2.463279 | 2.983023  | -1.512897 |
| H | 2.569922  | 1.857008  | -1.498888 |
| H | 1.597601  | 1.716006  | 1.396994  |
| H | 3.393434  | 2.645916  | -0.143304 |
| H | 1.116964  | -2.488223 | -1.768616 |
| H | -0.404995 | -1.742883 | -1.217218 |
| H | 0.006867  | -3.401101 | -0.762726 |
| H | 4.263075  | -2.538772 | -2.211153 |
| H | -3.056032 | -2.698739 | 0.173210  |

|   |           |           |           |
|---|-----------|-----------|-----------|
| H | -4.172484 | -2.024199 | 1.364098  |
| H | -3.433407 | -0.778145 | -1.331441 |
| H | -4.873004 | -2.791507 | -1.553355 |
| H | -6.033471 | -2.104147 | -0.403011 |
| H | -5.778153 | -1.328661 | -1.974350 |
| H | -5.482850 | 0.169230  | 0.745842  |
| H | -5.215443 | 0.898830  | -0.846048 |
| H | -3.950527 | 0.981913  | 0.385705  |

ωB97XD energy = -1154.84617597 a.u.

(2R,6R,7S,8S)-1, Conf. I

|   |           |           |           |
|---|-----------|-----------|-----------|
| C | 2.376031  | -3.112433 | -0.281938 |
| C | 2.811829  | -1.713371 | -0.642342 |
| C | 3.351993  | -0.809564 | 0.182221  |
| C | 3.796106  | -1.117739 | 1.587606  |
| C | 0.183821  | -1.911808 | 0.181836  |
| C | 1.051943  | -3.094689 | 0.542434  |
| C | 2.192326  | 1.402467  | 0.401910  |
| C | 0.818568  | 1.210301  | -0.305855 |
| C | -0.214892 | 0.572507  | 0.653708  |
| C | 0.203016  | -0.838895 | 0.985327  |
| O | 2.484336  | 2.821891  | 0.353153  |
| C | 1.537006  | 3.528069  | -0.282888 |
| C | 0.477941  | 2.603529  | -0.765377 |
| O | 1.612243  | 4.729525  | -0.412084 |
| C | -0.535866 | 3.034218  | -1.514633 |
| C | 3.382370  | 0.650576  | -0.211705 |
| C | -0.491925 | -1.992441 | -1.159816 |
| O | 2.140001  | -3.889746 | -1.456122 |
| O | -1.497668 | 0.650492  | 0.009566  |
| C | -2.583231 | 0.614561  | 0.798237  |
| O | -2.523595 | 0.533693  | 2.008365  |
| C | -3.863844 | 0.686547  | 0.008910  |
| C | -4.773529 | -0.527639 | 0.269375  |
| C | -6.120369 | -0.327411 | -0.425926 |
| C | -4.103555 | -1.826575 | -0.184392 |
| H | 3.135286  | -3.616984 | 0.329735  |
| H | 2.485173  | -1.383169 | -1.629048 |
| H | 3.878491  | -2.190381 | 1.777203  |
| H | 3.094851  | -0.706718 | 2.325224  |
| H | 1.318018  | -3.043790 | 1.602463  |
| H | 0.547179  | -4.051090 | 0.366633  |
| H | 4.771182  | -0.660313 | 1.789131  |
| H | 0.933930  | 0.542769  | -1.165382 |
| H | -0.266765 | 1.167016  | 1.570538  |
| H | 0.741789  | -0.921011 | 1.927256  |
| H | -1.290657 | 2.355675  | -1.896271 |
| H | -0.619775 | 4.089785  | -1.758548 |
| H | 3.355640  | 0.770556  | -1.300266 |
| H | 2.115339  | 1.166648  | 1.467071  |
| H | 4.295381  | 1.129380  | 0.159013  |
| H | 0.246650  | -2.205928 | -1.940810 |
| H | -1.039731 | -1.087583 | -1.420611 |
| H | -1.194539 | -2.834186 | -1.169409 |
| H | 2.959660  | -3.930714 | -1.962192 |
| H | -4.375909 | 1.604068  | 0.320479  |

|   |           |           |           |
|---|-----------|-----------|-----------|
| H | -3.637704 | 0.769762  | -1.058366 |
| H | -4.945816 | -0.586766 | 1.350736  |
| H | -6.618441 | 0.583653  | -0.077218 |
| H | -5.992066 | -0.247833 | -1.512512 |
| H | -6.788939 | -1.172090 | -0.229097 |
| H | -4.751618 | -2.686579 | 0.014687  |
| H | -3.156173 | -1.999904 | 0.337986  |
| H | -3.897410 | -1.802368 | -1.261603 |

ωB97XD energy = -1154.84616207 a.u.

(2R,6R,7S,8S)-1, Conf. J

|   |           |           |           |
|---|-----------|-----------|-----------|
| C | 3.820760  | -1.881477 | -0.321979 |
| C | 3.495311  | -0.444608 | -0.647804 |
| C | 3.504681  | 0.588767  | 0.200968  |
| C | 4.039768  | 0.513361  | 1.605859  |
| C | 1.319177  | -1.963950 | 0.137780  |
| C | 2.666855  | -2.553328 | 0.484236  |
| C | 1.389676  | 1.915680  | 0.438245  |
| C | 0.305352  | 1.072713  | -0.294876 |
| C | -0.269937 | -0.020815 | 0.637697  |
| C | 0.803937  | -1.032322 | 0.952111  |
| O | 0.927649  | 3.289749  | 0.413243  |
| C | -0.240856 | 3.435482  | -0.230629 |
| C | -0.686956 | 2.113153  | -0.741689 |
| O | -0.779300 | 4.513950  | -0.344627 |
| C | -1.773268 | 1.988077  | -1.502130 |
| C | 2.801418  | 1.876566  | -0.164790 |
| C | 0.764777  | -2.366711 | -1.201809 |
| O | 4.009348  | -2.640789 | -1.516728 |
| O | -1.411400 | -0.586530 | -0.028173 |
| C | -2.327141 | -1.201001 | 0.736582  |
| O | -2.231137 | -1.295284 | 1.943519  |
| C | -3.483128 | -1.727699 | -0.071765 |
| C | -4.805163 | -1.026205 | 0.295592  |
| C | -4.749125 | 0.471406  | -0.013285 |
| C | -5.967377 | -1.695181 | -0.438681 |
| H | 4.730738  | -1.952246 | 0.288260  |
| H | 3.049653  | -0.301948 | -1.632906 |
| H | 3.227918  | 0.554722  | 2.343199  |
| H | 4.696408  | 1.366210  | 1.812251  |
| H | 2.870347  | -2.398672 | 1.547973  |
| H | 2.715239  | -3.629401 | 0.284540  |
| H | 4.602970  | -0.403345 | 1.793636  |
| H | 0.748840  | 0.573579  | -1.162115 |
| H | -0.623706 | 0.445957  | 1.561815  |
| H | 1.318776  | -0.839830 | 1.891324  |
| H | -2.078471 | 1.029499  | -1.905943 |
| H | -2.376755 | 2.861183  | -1.735412 |
| H | 2.726645  | 1.996287  | -1.251039 |
| H | 1.434321  | 1.651608  | 1.498423  |
| H | 3.347848  | 2.738822  | 0.233166  |
| H | 1.519961  | -2.219760 | -1.982191 |
| H | -0.142609 | -1.828557 | -1.473936 |
| H | 0.537929  | -3.440107 | -1.197004 |
| H | 4.738604  | -2.250067 | -2.012075 |
| H | -3.275600 | -1.607755 | -1.139338 |

|   |           |           |           |
|---|-----------|-----------|-----------|
| H | -3.565326 | -2.798352 | 0.144145  |
| H | -4.956202 | -1.153528 | 1.374361  |
| H | -3.932588 | 0.972299  | 0.519068  |
| H | -4.605041 | 0.642142  | -1.087127 |
| H | -5.683118 | 0.961400  | 0.280608  |
| H | -6.918708 | -1.223707 | -0.170944 |
| H | -6.037379 | -2.760346 | -0.193204 |
| H | -5.844539 | -1.606313 | -1.525187 |

ωB97XD energy = -1154.84603782 a.u.

(2R,6R,7S,8S)-1, Conf. K

|   |           |           |           |
|---|-----------|-----------|-----------|
| C | 4.070422  | -1.506166 | -0.403152 |
| C | 3.534539  | -0.176663 | -0.851403 |
| C | 3.441421  | 0.937569  | -0.113967 |
| C | 4.121750  | 1.172054  | 1.209749  |
| C | 1.716176  | -1.840609 | 0.447856  |
| C | 2.889532  | -2.500568 | -0.241368 |
| C | 1.120599  | 1.765058  | 0.211914  |
| C | 0.020541  | 1.012705  | -0.595306 |
| C | -0.323352 | -0.349695 | 0.063354  |
| C | 0.733809  | -1.342028 | -0.310743 |
| O | 0.542499  | 3.038046  | 0.600087  |
| C | -0.714968 | 3.198422  | 0.160411  |
| C | -1.104849 | 2.012701  | -0.644459 |
| O | -1.359400 | 4.192784  | 0.409233  |
| C | -2.245591 | 1.978207  | -1.330770 |
| C | 2.461425  | 2.023698  | -0.504457 |
| C | 1.843489  | -1.652832 | 1.932230  |
| O | 4.954358  | -2.100237 | -1.353318 |
| O | -1.595307 | -0.772351 | -0.467865 |
| C | -2.305690 | -1.645460 | 0.266581  |
| O | -1.914744 | -2.095426 | 1.324503  |
| C | -3.634948 | -1.949529 | -0.369924 |
| C | -4.642641 | -0.787907 | -0.231267 |
| C | -5.956510 | -1.173494 | -0.911701 |
| C | -4.866086 | -0.401206 | 1.231525  |
| H | 4.584698  | -1.409916 | 0.559438  |
| H | 3.001028  | -0.207984 | -1.802422 |
| H | 4.724617  | 2.086181  | 1.149752  |
| H | 4.780325  | 0.356889  | 1.514339  |
| H | 3.245280  | -3.379127 | 0.307520  |
| H | 2.602095  | -2.823685 | -1.247588 |
| H | 3.391588  | 1.336755  | 2.011615  |
| H | 0.376482  | 0.813143  | -1.611121 |
| H | -0.434132 | -0.222872 | 1.142253  |
| H | 0.765509  | -1.537787 | -1.383173 |
| H | -2.501887 | 1.136773  | -1.964671 |
| H | -2.944227 | 2.808377  | -1.270397 |
| H | 2.307855  | 2.065761  | -1.587395 |
| H | 1.312460  | 1.244285  | 1.154595  |
| H | 2.825814  | 3.002971  | -0.176927 |
| H | 0.969902  | -1.178895 | 2.383678  |
| H | 2.726783  | -1.048218 | 2.170753  |
| H | 1.986545  | -2.625184 | 2.417712  |
| H | 5.715452  | -1.518545 | -1.461826 |
| H | -3.475126 | -2.168032 | -1.430645 |

|   |           |           |           |
|---|-----------|-----------|-----------|
| H | -4.035391 | -2.844518 | 0.114852  |
| H | -4.227020 | 0.082546  | -0.752739 |
| H | -6.678399 | -0.351589 | -0.860976 |
| H | -5.801493 | -1.420216 | -1.967736 |
| H | -6.408191 | -2.045859 | -0.423836 |
| H | -5.618222 | 0.390808  | 1.307776  |
| H | -3.948306 | -0.029765 | 1.700206  |
| H | -5.217689 | -1.260375 | 1.815232  |

ωB97XD energy = -1154.84591610 a.u.

(2R,6R,7S,8S)-1, Conf. L

|   |           |           |           |
|---|-----------|-----------|-----------|
| C | 2.679985  | -2.955061 | -0.320528 |
| C | 2.928139  | -1.597793 | -0.906653 |
| C | 3.283041  | -0.512953 | -0.207034 |
| C | 3.786328  | -0.554153 | 1.216582  |
| C | 0.526837  | -1.969557 | 0.596626  |
| C | 1.151247  | -3.147811 | -0.117645 |
| C | 1.958014  | 1.623213  | 0.005106  |
| C | 0.483143  | 1.513444  | -0.482390 |
| C | -0.323326 | 0.430206  | 0.262507  |
| C | 0.107261  | -0.941946 | -0.151536 |
| O | 2.285120  | 3.035588  | -0.068065 |
| C | 1.188172  | 3.803509  | -0.133254 |
| C | -0.007904 | 2.935461  | -0.312115 |
| O | 1.245227  | 5.011129  | -0.070304 |
| C | -1.226032 | 3.474585  | -0.345507 |
| C | 3.058691  | 0.873574  | -0.764592 |
| C | 0.554419  | -2.012645 | 2.097424  |
| O | 3.092574  | -4.018437 | -1.177128 |
| O | -1.702921 | 0.599880  | -0.150062 |
| C | -2.660972 | 0.207277  | 0.703743  |
| O | -2.432953 | -0.198844 | 1.825562  |
| C | -4.034899 | 0.316485  | 0.097117  |
| C | -4.681842 | -1.070574 | -0.092697 |
| C | -6.095609 | -0.908135 | -0.650970 |
| C | -3.828322 | -1.964140 | -0.995811 |
| H | 3.176275  | -3.056737 | 0.652021  |
| H | 2.560142  | -1.469164 | -1.925266 |
| H | 4.496024  | 0.261675  | 1.391272  |
| H | 4.293685  | -1.492414 | 1.452183  |
| H | 0.994879  | -4.082089 | 0.432375  |
| H | 0.709084  | -3.267307 | -1.112595 |
| H | 2.973722  | -0.432261 | 1.942109  |
| H | 0.481007  | 1.268359  | -1.552733 |
| H | -0.262247 | 0.593926  | 1.340258  |
| H | 0.131136  | -1.064966 | -1.234263 |
| H | -2.121102 | 2.888279  | -0.507754 |
| H | -1.332069 | 4.547637  | -0.210161 |
| H | 2.810829  | 0.840687  | -1.830448 |
| H | 2.003426  | 1.368841  | 1.069257  |
| H | 3.971144  | 1.470415  | -0.650613 |
| H | 1.554579  | -2.280422 | 2.457810  |
| H | -0.128112 | -2.793550 | 2.453349  |
| H | 0.251837  | -1.073602 | 2.563887  |
| H | 4.041778  | -3.935798 | -1.323185 |
| H | -4.647557 | 0.917880  | 0.776858  |

|   |           |           |           |
|---|-----------|-----------|-----------|
| H | -3.972937 | 0.833905  | -0.865017 |
| H | -4.749727 | -1.541346 | 0.895646  |
| H | -6.585893 | -1.881579 | -0.756816 |
| H | -6.716600 | -0.287520 | 0.004307  |
| H | -6.072443 | -0.435928 | -1.640768 |
| H | -2.835699 | -2.146473 | -0.569050 |
| H | -3.691279 | -1.505275 | -1.982756 |
| H | -4.308473 | -2.937622 | -1.140165 |

ωB97XD energy = -1154.84586835 a.u.

(2R,6R,7S,8S)-1, Conf. M

|   |           |           |           |
|---|-----------|-----------|-----------|
| C | 3.009317  | -2.608429 | -0.393753 |
| C | 3.012547  | -1.245357 | -1.019357 |
| C | 3.277966  | -0.104150 | -0.371641 |
| C | 3.906246  | -0.039197 | 1.000570  |
| C | 0.820831  | -1.911166 | 0.688225  |
| C | 1.545104  | -3.008373 | -0.059627 |
| C | 1.672678  | 1.810270  | -0.052743 |
| C | 0.197465  | 1.486934  | -0.433655 |
| C | -0.394693 | 0.329898  | 0.398279  |
| C | 0.185338  | -0.980476 | -0.033703 |
| O | 1.788161  | 3.255701  | -0.122327 |
| C | 0.591043  | 3.859255  | -0.129931 |
| C | -0.475763 | 2.831340  | -0.267052 |
| O | 0.477889  | 5.062330  | -0.055749 |
| C | -1.758512 | 3.191781  | -0.288827 |
| C | 2.803795  | 1.224161  | -0.915902 |
| C | 0.989698  | -1.901013 | 2.180450  |
| O | 3.497661  | -3.626522 | -1.264980 |
| O | -1.813299 | 0.307160  | 0.110331  |
| C | -2.625768 | -0.244444 | 1.025729  |
| O | -2.244192 | -0.622817 | 2.114585  |
| C | -4.044156 | -0.322407 | 0.524226  |
| C | -4.182723 | -1.090964 | -0.803269 |
| C | -3.606684 | -2.503940 | -0.686796 |
| C | -5.650961 | -1.125802 | -1.227580 |
| H | 3.592277  | -2.610715 | 0.535294  |
| H | 2.538359  | -1.195034 | -2.000276 |
| H | 4.575554  | -0.880488 | 1.194472  |
| H | 3.149242  | -0.034825 | 1.792989  |
| H | 1.568471  | -3.940781 | 0.514724  |
| H | 1.044614  | -3.213097 | -1.012095 |
| H | 4.487104  | 0.882867  | 1.108480  |
| H | 0.155069  | 1.201793  | -1.492782 |
| H | -0.261645 | 0.528963  | 1.463778  |
| H | 0.128496  | -1.129821 | -1.111930 |
| H | -2.558762 | 2.476620  | -0.429725 |
| H | -2.015433 | 4.240841  | -0.168681 |
| H | 2.469993  | 1.135463  | -1.954740 |
| H | 1.836647  | 1.560131  | 1.000423  |
| H | 3.621689  | 1.953238  | -0.886606 |
| H | 0.604711  | -0.996427 | 2.653717  |
| H | 2.045534  | -2.019785 | 2.450135  |
| H | 0.457093  | -2.755167 | 2.615155  |
| H | 4.415883  | -3.425343 | -1.478328 |
| H | -4.639380 | -0.802740 | 1.306063  |

|   |           |           |           |
|---|-----------|-----------|-----------|
| H | -4.416146 | 0.701867  | 0.398665  |
| H | -3.614472 | -0.547460 | -1.567676 |
| H | -3.728095 | -3.048549 | -1.629068 |
| H | -2.536833 | -2.490003 | -0.448243 |
| H | -4.119253 | -3.070045 | 0.100589  |
| H | -5.765006 | -1.631527 | -2.192175 |
| H | -6.064629 | -0.116108 | -1.326698 |
| H | -6.257471 | -1.668204 | -0.492194 |

ωB97XD energy = -1154.84586682 a.u.

(2R,6R,7S,8S)-1, Conf. N

|   |           |           |           |
|---|-----------|-----------|-----------|
| C | 4.134780  | -1.583246 | 0.344871  |
| C | 3.792882  | -0.109568 | 0.287357  |
| C | 3.308019  | 0.594936  | -0.743326 |
| C | 3.253634  | 0.117827  | -2.166970 |
| C | 1.623843  | -1.824447 | 0.708553  |
| C | 2.872171  | -2.480815 | 0.168300  |
| C | 1.346597  | 1.732640  | 0.330188  |
| C | 0.135242  | 1.140674  | -0.446425 |
| C | -0.280186 | -0.235036 | 0.126570  |
| C | 0.787806  | -1.242673 | -0.160388 |
| O | 0.919745  | 3.022630  | 0.835970  |
| C | -0.354265 | 3.307960  | 0.528262  |
| C | -0.914433 | 2.212767  | -0.306387 |
| O | -0.890674 | 4.328561  | 0.897958  |
| C | -2.135936 | 2.295042  | -0.831612 |
| C | 2.648938  | 1.934178  | -0.454412 |
| C | 1.513072  | -1.731951 | 2.204264  |
| O | 5.063161  | -2.027592 | -0.643531 |
| O | -1.496632 | -0.607550 | -0.555882 |
| C | -2.387259 | -1.347602 | 0.122702  |
| O | -2.219813 | -1.706505 | 1.270786  |
| C | -3.605062 | -1.669896 | -0.704440 |
| C | -4.914062 | -1.299742 | 0.012975  |
| C | -5.002490 | 0.207829  | 0.261909  |
| C | -6.111464 | -1.790937 | -0.801390 |
| H | 4.559088  | -1.778411 | 1.338511  |
| H | 3.769609  | 0.369859  | 1.266820  |
| H | 3.631713  | -0.898781 | -2.281437 |
| H | 3.858071  | 0.778454  | -2.801664 |
| H | 3.064242  | -3.445279 | 0.650969  |
| H | 2.757604  | -2.659846 | -0.904817 |
| H | 2.229588  | 0.167546  | -2.555807 |
| H | 0.391858  | 1.002712  | -1.502044 |
| H | -0.496508 | -0.138610 | 1.192159  |
| H | 0.979151  | -1.375611 | -1.224736 |
| H | -2.532806 | 1.521217  | -1.478323 |
| H | -2.759110 | 3.159675  | -0.619746 |
| H | 2.437150  | 2.481891  | -1.379505 |
| H | 1.560702  | 1.130197  | 1.217561  |
| H | 3.301224  | 2.562714  | 0.160418  |
| H | 1.652756  | -2.722558 | 2.651357  |
| H | 0.548915  | -1.345444 | 2.540229  |
| H | 2.302004  | -1.087970 | 2.613836  |
| H | 5.860654  | -1.491256 | -0.567812 |
| H | -3.539236 | -1.161054 | -1.670913 |



|   |           |           |           |
|---|-----------|-----------|-----------|
| H | -3.579479 | -2.749791 | -0.892883 |
| H | -4.917323 | -1.812473 | 0.982243  |
| H | -5.927710 | 0.459257  | 0.790773  |
| H | -4.166569 | 0.573125  | 0.869153  |
| H | -4.999778 | 0.758769  | -0.686807 |
| H | -7.050928 | -1.568545 | -0.284456 |
| H | -6.066312 | -2.872917 | -0.966846 |
| H | -6.145821 | -1.300854 | -1.782260 |

ωB97XD energy = -1154.84553303 a.u.

(2R,6R,7S,8S)-1, Conf. O

|   |           |           |           |
|---|-----------|-----------|-----------|
| C | -4.139531 | -1.436337 | -0.181976 |
| C | -3.742077 | 0.020814  | -0.075799 |
| C | -3.130723 | 0.647757  | 0.937718  |
| C | -2.949449 | 0.084576  | 2.318537  |
| C | -1.689645 | -1.723399 | -0.815783 |
| C | -2.895193 | -2.374763 | -0.179959 |
| C | -1.241264 | 1.778597  | -0.267545 |
| C | 0.019586  | 1.110529  | 0.356107  |
| C | 0.330653  | -0.234195 | -0.343432 |
| C | -0.745596 | -1.220743 | -0.011184 |
| O | -0.820940 | 3.078953  | -0.750952 |
| C | 0.481000  | 3.319154  | -0.536472 |
| C | 1.077480  | 2.170910  | 0.195536  |
| O | 1.012793  | 4.344401  | -0.899827 |
| C | 2.329408  | 2.210260  | 0.647496  |
| C | -2.450177 | 1.977829  | 0.655541  |
| C | -1.736999 | -1.548410 | -2.307386 |
| O | -4.982744 | -1.913364 | 0.865345  |
| O | 1.587969  | -0.708656 | 0.187642  |
| C | 2.300590  | -1.542106 | -0.590071 |
| O | 1.983426  | -1.820178 | -1.728878 |
| C | 3.504875  | -2.097882 | 0.125043  |
| C | 4.422820  | -1.041870 | 0.761882  |
| C | 5.582825  | -1.732037 | 1.480674  |
| C | 4.934139  | -0.049108 | -0.283602 |
| H | -4.661558 | -1.561327 | -1.139770 |
| H | -3.796642 | 0.555332  | -1.025056 |
| H | -1.885598 | 0.032246  | 2.578725  |
| H | -3.391961 | -0.906371 | 2.426307  |
| H | -3.165548 | -3.308396 | -0.685492 |
| H | -2.679097 | -2.609417 | 0.866758  |
| H | -3.416076 | 0.750462  | 3.055288  |
| H | -0.148696 | 0.909101  | 1.418994  |
| H | 0.448676  | -0.072039 | -1.416325 |
| H | -0.828948 | -1.413465 | 1.057956  |
| H | 2.752833  | 1.396893  | 1.224639  |
| H | 2.952705  | 3.076568  | 0.443355  |
| H | -2.125074 | 2.464804  | 1.581581  |
| H | -1.562608 | 1.230212  | -1.156820 |
| H | -3.135656 | 2.662275  | 0.145356  |
| H | -1.927740 | -2.514112 | -2.789015 |
| H | -0.812006 | -1.144177 | -2.722899 |
| H | -2.561298 | -0.883680 | -2.596393 |
| H | -5.767710 | -1.354657 | 0.897221  |
| H | 3.131664  | -2.778675 | 0.900268  |

|   |          |           |           |
|---|----------|-----------|-----------|
| H | 4.061677 | -2.695024 | -0.602900 |
| H | 3.837142 | -0.495689 | 1.510848  |
| H | 6.230800 | -0.996725 | 1.969140  |
| H | 5.221785 | -2.426230 | 2.247367  |
| H | 6.197427 | -2.302354 | 0.773694  |
| H | 5.564069 | 0.717296  | 0.180325  |
| H | 4.113056 | 0.463902  | -0.797458 |
| H | 5.534021 | -0.563443 | -1.044287 |

ωB97XD energy = -1154.84539924 a.u.

(2R,6R,7S,8S)-1, Conf. P

|   |           |           |           |
|---|-----------|-----------|-----------|
| C | 2.805698  | -2.747140 | -0.316583 |
| C | 2.897119  | -1.361724 | -0.887779 |
| C | 3.380899  | -0.273341 | -0.275743 |
| C | 4.222149  | -0.271980 | 0.974021  |
| C | 0.641673  | -1.890838 | 0.669285  |
| C | 1.317758  | -3.062545 | -0.007337 |
| C | 1.745071  | 1.570507  | 0.090281  |
| C | 0.331426  | 1.389073  | -0.540878 |
| C | -0.510116 | 0.352775  | 0.245850  |
| C | -0.042998 | -1.029529 | -0.091977 |
| O | 1.892686  | 2.988302  | 0.359832  |
| C | 0.798501  | 3.697931  | 0.047748  |
| C | -0.221579 | 2.791822  | -0.540803 |
| O | 0.734282  | 4.892586  | 0.234396  |
| C | -1.373977 | 3.265039  | -1.012836 |
| C | 2.958846  | 1.104400  | -0.740535 |
| C | 0.949929  | -1.701098 | 2.126619  |
| O | 3.238661  | -3.758638 | -1.225209 |
| O | -1.874716 | 0.498119  | -0.195699 |
| C | -2.849731 | 0.187145  | 0.674911  |
| O | -2.636204 | -0.140406 | 1.825036  |
| C | -4.212561 | 0.280888  | 0.041949  |
| C | -4.702861 | -1.069411 | -0.536898 |
| C | -3.789073 | -1.588503 | -1.649299 |
| C | -4.901009 | -2.127144 | 0.550248  |
| H | 3.381101  | -2.823125 | 0.612857  |
| H | 2.322787  | -1.220522 | -1.804514 |
| H | 4.455313  | -1.271695 | 1.344542  |
| H | 3.738619  | 0.285331  | 1.785384  |
| H | 1.273851  | -3.969079 | 0.606130  |
| H | 0.829635  | -3.277591 | -0.963824 |
| H | 5.170329  | 0.240181  | 0.770583  |
| H | 0.427469  | 1.032296  | -1.572068 |
| H | -0.466823 | 0.574325  | 1.314044  |
| H | -0.181151 | -1.272958 | -1.145762 |
| H | -2.110414 | 2.620063  | -1.477634 |
| H | -1.590793 | 4.327137  | -0.936731 |
| H | 2.712488  | 1.115207  | -1.806888 |
| H | 1.773579  | 1.089689  | 1.072685  |
| H | 3.763400  | 1.828393  | -0.574212 |
| H | 0.690944  | -2.609272 | 2.682786  |
| H | 0.411147  | -0.865056 | 2.576332  |
| H | 2.024277  | -1.536858 | 2.275055  |
| H | 4.169805  | -3.606972 | -1.423307 |
| H | -4.908839 | 0.616283  | 0.815213  |

|   |           |           |           |
|---|-----------|-----------|-----------|
| H | -4.185988 | 1.029276  | -0.754996 |
| H | -5.682875 | -0.851344 | -0.979092 |
| H | -4.229368 | -2.472871 | -2.121836 |
| H | -3.630142 | -0.833350 | -2.426722 |
| H | -2.808109 | -1.877456 | -1.255113 |
| H | -5.348877 | -3.030840 | 0.123255  |
| H | -5.561564 | -1.765186 | 1.345260  |
| H | -3.948460 | -2.411673 | 1.010260  |

ωB97XD energy = -1154.84516610 a.u.

(2R,6R,7S,8S)-1, Conf. Q

|   |           |           |           |
|---|-----------|-----------|-----------|
| C | 3.237883  | -2.456607 | 0.323047  |
| C | 3.397311  | -0.978273 | 0.039800  |
| C | 2.980136  | -0.281958 | -1.025486 |
| C | 2.495033  | -0.880227 | -2.315621 |
| C | 0.911978  | -1.734046 | 1.066320  |
| C | 1.740265  | -2.856511 | 0.488536  |
| C | 1.749246  | 1.613003  | 0.077657  |
| C | 0.283390  | 1.399503  | -0.399235 |
| C | -0.441770 | 0.342938  | 0.465283  |
| C | 0.165995  | -1.003690 | 0.228764  |
| O | 1.883034  | 3.026648  | 0.371030  |
| C | 0.743644  | 3.709001  | 0.184107  |
| C | -0.306669 | 2.783617  | -0.317138 |
| O | 0.664430  | 4.897323  | 0.401991  |
| C | -1.519931 | 3.225317  | -0.645124 |
| C | 2.868906  | 1.228655  | -0.898172 |
| C | 1.133764  | -1.421127 | 2.519116  |
| O | 3.758643  | -3.325484 | -0.681741 |
| O | -1.813803 | 0.324317  | 0.018147  |
| C | -2.753509 | -0.041098 | 0.905959  |
| O | -2.517192 | -0.251871 | 2.078063  |
| C | -4.106457 | -0.158621 | 0.255681  |
| C | -4.145681 | -1.219014 | -0.862329 |
| C | -3.701539 | -2.588409 | -0.343391 |
| C | -5.549550 | -1.286150 | -1.464326 |
| H | 3.754541  | -2.662514 | 1.269799  |
| H | 3.723362  | -0.403007 | 0.907217  |
| H | 2.484159  | -1.970680 | -2.293069 |
| H | 3.147737  | -0.562787 | -3.138756 |
| H | 1.690117  | -3.759244 | 1.107462  |
| H | 1.368949  | -3.112245 | -0.508247 |
| H | 1.490509  | -0.515664 | -2.559655 |
| H | 0.271198  | 1.049129  | -1.436731 |
| H | -0.419120 | 0.644556  | 1.514465  |
| H | 0.090492  | -1.328787 | -0.808595 |
| H | -2.281586 | 2.563643  | -1.041364 |
| H | -1.762590 | 4.276971  | -0.518946 |
| H | 2.681029  | 1.698844  | -1.869891 |
| H | 1.916139  | 1.100016  | 1.029141  |
| H | 3.797237  | 1.652577  | -0.501585 |
| H | 2.148902  | -1.037126 | 2.684009  |
| H | 1.041647  | -2.335696 | 3.115194  |
| H | 0.424759  | -0.689610 | 2.912023  |
| H | 4.688316  | -3.106997 | -0.813594 |
| H | -4.826095 | -0.407534 | 1.040554  |

|   |           |           |           |
|---|-----------|-----------|-----------|
| H | -4.374465 | 0.821103  | -0.156472 |
| H | -3.446966 | -0.903717 | -1.646643 |
| H | -3.741729 | -3.337070 | -1.141510 |
| H | -2.674391 | -2.568714 | 0.038767  |
| H | -4.354445 | -2.926991 | 0.470381  |
| H | -5.585886 | -2.013173 | -2.282324 |
| H | -5.864036 | -0.314938 | -1.861933 |
| H | -6.283354 | -1.595628 | -0.710305 |

ωB97XD energy = -1154.84501690 a.u.

(2R,6R,7S,8S)-1, Conf. R

|   |           |           |           |
|---|-----------|-----------|-----------|
| C | 3.219747  | -2.556040 | 0.405204  |
| C | 3.430631  | -1.071387 | 0.199534  |
| C | 3.140019  | -0.327749 | -0.875828 |
| C | 2.786826  | -0.870430 | -2.231526 |
| C | 0.844001  | -1.812374 | 0.940280  |
| C | 1.706368  | -2.929656 | 0.402909  |
| C | 1.840445  | 1.550799  | 0.176730  |
| C | 0.424992  | 1.391277  | -0.450462 |
| C | -0.401991 | 0.316301  | 0.292373  |
| C | 0.199692  | -1.033966 | 0.062252  |
| O | 1.972127  | 2.947800  | 0.542015  |
| C | 0.869466  | 3.663356  | 0.276264  |
| C | -0.144278 | 2.784168  | -0.365113 |
| O | 0.791697  | 4.842842  | 0.538129  |
| C | -1.309940 | 3.267948  | -0.791691 |
| C | 3.040979  | 1.179198  | -0.703252 |
| C | 0.925340  | -1.560724 | 2.419611  |
| O | 3.824970  | -3.395438 | -0.577203 |
| O | -1.724500 | 0.338854  | -0.287720 |
| C | -2.773042 | 0.154183  | 0.529933  |
| O | -2.671346 | 0.031109  | 1.734122  |
| C | -4.074988 | 0.093668  | -0.223808 |
| C | -4.727381 | -1.297849 | -0.104927 |
| C | -6.089070 | -1.294106 | -0.799335 |
| C | -3.817848 | -2.387477 | -0.677179 |
| H | 3.635750  | -2.809195 | 1.389116  |
| H | 3.670209  | -0.536252 | 1.119384  |
| H | 3.511552  | -0.512774 | -2.973891 |
| H | 1.805973  | -0.502672 | -2.556042 |
| H | 1.577570  | -3.855395 | 0.974552  |
| H | 1.434540  | -3.136635 | -0.636496 |
| H | 2.784907  | -1.960736 | -2.256399 |
| H | 0.510078  | 1.087616  | -1.499265 |
| H | -0.481570 | 0.575519  | 1.349478  |
| H | 0.224320  | -1.317019 | -0.989602 |
| H | -2.041365 | 2.644550  | -1.293218 |
| H | -1.543275 | 4.318652  | -0.642286 |
| H | 2.951004  | 1.685153  | -1.670900 |
| H | 1.903178  | 0.996248  | 1.117431  |
| H | 3.935611  | 1.571200  | -0.208917 |
| H | 0.204598  | -0.818744 | 2.768773  |
| H | 1.930542  | -1.220799 | 2.701298  |
| H | 0.744014  | -2.492683 | 2.966531  |
| H | 4.763156  | -3.177709 | -0.619402 |
| H | -4.739318 | 0.849281  | 0.208661  |

|   |           |           |           |
|---|-----------|-----------|-----------|
| H | -3.906267 | 0.339723  | -1.276504 |
| H | -4.881788 | -1.499424 | 0.962005  |
| H | -6.582260 | -2.265860 | -0.690032 |
| H | -6.752595 | -0.531113 | -0.377808 |
| H | -5.979636 | -1.092817 | -1.872165 |
| H | -4.293572 | -3.369979 | -0.592236 |
| H | -2.858561 | -2.440689 | -0.150135 |
| H | -3.610180 | -2.203627 | -1.738489 |

ωB97XD energy = -1154.84497158 a.u.

(2R,6R,7S,8S)-1, Conf. S

|   |           |           |           |
|---|-----------|-----------|-----------|
| C | 3.980581  | -1.632338 | -0.323694 |
| C | 3.533526  | -0.261178 | -0.742522 |
| C | 3.460715  | 0.829367  | 0.031406  |
| C | 4.096984  | 0.988645  | 1.387477  |
| C | 1.566969  | -1.876707 | 0.380127  |
| C | 2.744574  | -2.569283 | -0.269358 |
| C | 1.162956  | 1.744380  | 0.281172  |
| C | 0.069076  | 1.098316  | -0.621567 |
| C | -0.380093 | -0.278165 | -0.065327 |
| C | 0.656893  | -1.301182 | -0.413536 |
| O | 0.631566  | 3.022944  | 0.714665  |
| C | -0.588302 | 3.278640  | 0.218163  |
| C | -1.001507 | 2.157475  | -0.663406 |
| O | -1.188245 | 4.296164  | 0.484659  |
| C | -2.122228 | 2.212528  | -1.380560 |
| C | 2.548492  | 1.973234  | -0.358206 |
| C | 1.621519  | -1.743578 | 1.874844  |
| O | 4.886184  | -2.231801 | -1.249784 |
| O | -1.619339 | -0.616353 | -0.721256 |
| C | -2.421402 | -1.496530 | -0.097265 |
| O | -2.150761 | -1.988621 | 0.979683  |
| C | -3.677399 | -1.774960 | -0.883062 |
| C | -4.953384 | -1.193899 | -0.228738 |
| C | -5.299719 | -1.869211 | 1.099432  |
| C | -4.867893 | 0.326108  | -0.073601 |
| H | 4.444030  | -1.602308 | 0.668569  |
| H | 3.039414  | -0.231626 | -1.714517 |
| H | 4.776643  | 1.849344  | 1.369276  |
| H | 4.671388  | 0.117622  | 1.707478  |
| H | 3.023141  | -3.486219 | 0.261302  |
| H | 2.500424  | -2.837259 | -1.302748 |
| H | 3.346410  | 1.203773  | 2.157649  |
| H | 0.467109  | 0.937154  | -1.628636 |
| H | -0.570682 | -0.203245 | 1.007246  |
| H | 0.744452  | -1.458358 | -1.489144 |
| H | -2.403891 | 1.416347  | -2.059665 |
| H | -2.778715 | 3.074318  | -1.296736 |
| H | 2.450618  | 2.068290  | -1.444158 |
| H | 1.281775  | 1.161900  | 1.199581  |
| H | 2.937281  | 2.920684  | 0.029225  |
| H | 1.716683  | -2.733921 | 2.334760  |
| H | 0.739569  | -1.259279 | 2.298485  |
| H | 2.506534  | -1.170259 | 2.177274  |
| H | 5.679418  | -1.685686 | -1.291642 |
| H | -3.563645 | -1.366890 | -1.890591 |

|   |           |           |           |
|---|-----------|-----------|-----------|
| H | -3.774416 | -2.862685 | -0.961382 |
| H | -5.761261 | -1.415954 | -0.936989 |
| H | -6.266289 | -1.507462 | 1.467040  |
| H | -5.365361 | -2.956899 | 0.988457  |
| H | -4.546590 | -1.657177 | 1.864474  |
| H | -5.804754 | 0.724787  | 0.329636  |
| H | -4.681759 | 0.817357  | -1.034349 |
| H | -4.064901 | 0.615024  | 0.615704  |

ωB97XD energy = -1154.84491923 a.u.

(2R,6R,7S,8S)-1, Conf. T

|   |           |           |           |
|---|-----------|-----------|-----------|
| C | 3.464502  | -2.413644 | 0.358041  |
| C | 3.574196  | -0.908262 | 0.243891  |
| C | 3.287872  | -0.125395 | -0.804505 |
| C | 3.044774  | -0.611382 | -2.205222 |
| C | 1.014530  | -1.873489 | 0.799977  |
| C | 1.985115  | -2.895366 | 0.257588  |
| C | 1.799603  | 1.591382  | 0.268666  |
| C | 0.437235  | 1.361740  | -0.448257 |
| C | -0.345330 | 0.194529  | 0.198229  |
| C | 0.360474  | -1.096469 | -0.072098 |
| O | 1.800510  | 2.970587  | 0.715904  |
| C | 0.659613  | 3.613654  | 0.426951  |
| C | -0.238634 | 2.703448  | -0.332116 |
| O | 0.469714  | 4.763581  | 0.754673  |
| C | -1.402615 | 3.127539  | -0.821972 |
| C | 3.071413  | 1.358802  | -0.556176 |
| C | 0.993724  | -1.699764 | 2.292473  |
| O | 4.176296  | -3.149678 | -0.635628 |
| O | -1.643261 | 0.163785  | -0.434856 |
| C | -2.708516 | -0.116848 | 0.333065  |
| O | -2.634141 | -0.337105 | 1.524679  |
| C | -3.990844 | -0.084318 | -0.459217 |
| C | -5.001572 | -1.152063 | -0.019387 |
| C | -6.342679 | -0.923395 | -0.717689 |
| C | -4.469559 | -2.560314 | -0.296308 |
| H | 3.850814  | -2.692732 | 1.346960  |
| H | 3.725429  | -0.410982 | 1.202867  |
| H | 2.064574  | -0.279556 | -2.568156 |
| H | 3.107279  | -1.697183 | -2.286818 |
| H | 1.896737  | -3.855037 | 0.778638  |
| H | 1.782481  | -3.069022 | -0.803419 |
| H | 3.788479  | -0.175582 | -2.884612 |
| H | 0.601513  | 1.117718  | -1.503049 |
| H | -0.484914 | 0.389801  | 1.262499  |
| H | 0.463028  | -1.316695 | -1.134246 |
| H | -2.044639 | 2.484623  | -1.413439 |
| H | -1.724259 | 4.149173  | -0.638867 |
| H | 2.998641  | 1.913012  | -1.498330 |
| H | 1.854179  | 0.991245  | 1.181455  |
| H | 3.906495  | 1.781903  | 0.011306  |
| H | 1.950984  | -1.301172 | 2.653066  |
| H | 0.854739  | -2.671671 | 2.778824  |
| H | 0.198617  | -1.034672 | 2.635042  |
| H | 5.098013  | -2.867867 | -0.614448 |
| H | -4.415757 | 0.917152  | -0.309325 |

|   |           |           |           |
|---|-----------|-----------|-----------|
| H | -3.761375 | -0.181886 | -1.525186 |
| H | -5.149554 | -1.044549 | 1.061484  |
| H | -7.079997 | -1.666289 | -0.396039 |
| H | -6.747807 | 0.069665  | -0.494472 |
| H | -6.237200 | -1.007758 | -1.806474 |
| H | -5.182305 | -3.318721 | 0.044188  |
| H | -3.519865 | -2.743828 | 0.217690  |
| H | -4.307090 | -2.710765 | -1.370926 |

ωB97XD energy = -1154.84475134 a.u.

(2R,6R,7S,8S)-1, Conf. U

|   |           |           |           |
|---|-----------|-----------|-----------|
| C | 2.092509  | -3.264418 | -0.287007 |
| C | 2.585234  | -1.961824 | -0.843270 |
| C | 3.043838  | -0.941098 | -0.108289 |
| C | 3.422561  | -1.054724 | 1.348818  |
| C | 0.083161  | -1.959657 | 0.566974  |
| C | 0.544630  | -3.209729 | -0.149379 |
| C | 2.097678  | 1.396193  | 0.058810  |
| C | 0.633976  | 1.513692  | -0.458245 |
| C | -0.341158 | 0.555993  | 0.252288  |
| C | -0.105773 | -0.860100 | -0.172431 |
| O | 2.646839  | 2.736019  | -0.043870 |
| C | 1.683772  | 3.665741  | -0.120673 |
| C | 0.364968  | 2.992499  | -0.277444 |
| O | 1.929752  | 4.850251  | -0.079314 |
| C | -0.759133 | 3.708056  | -0.273082 |
| C | 3.080631  | 0.462827  | -0.666229 |
| C | -0.002900 | -2.040364 | 2.063698  |
| O | 2.363635  | -4.373913 | -1.141086 |
| O | -1.672723 | 0.924592  | -0.187398 |
| C | -2.694184 | 0.652803  | 0.642738  |
| O | -2.539287 | 0.264272  | 1.783257  |
| C | -4.028712 | 0.863068  | -0.020593 |
| C | -4.581789 | -0.431966 | -0.667987 |
| C | -3.694429 | -0.937526 | -1.807857 |
| C | -4.829704 | -1.534155 | 0.363803  |
| H | 2.524401  | -3.452760 | 0.703318  |
| H | 2.318715  | -1.782814 | -1.885654 |
| H | 4.235693  | -0.359494 | 1.584236  |
| H | 3.753877  | -2.059989 | 1.618305  |
| H | 0.217764  | -4.115676 | 0.372173  |
| H | 0.132901  | -3.240346 | -1.163933 |
| H | 2.583794  | -0.799726 | 2.006714  |
| H | 0.618700  | 1.285748  | -1.532932 |
| H | -0.281327 | 0.696620  | 1.333575  |
| H | -0.023377 | -0.964286 | -1.253957 |
| H | -1.735309 | 3.261259  | -0.409627 |
| H | -0.698895 | 4.783941  | -0.131805 |
| H | 2.874483  | 0.471177  | -1.741312 |
| H | 2.079653  | 1.167492  | 1.129825  |
| H | 4.075962  | 0.896362  | -0.512724 |
| H | 0.909737  | -2.483283 | 2.479901  |
| H | -0.830986 | -2.700550 | 2.348094  |
| H | -0.174075 | -1.073178 | 2.539366  |
| H | 3.319169  | -4.448287 | -1.243647 |
| H | -4.725579 | 1.208581  | 0.747641  |

|   |           |           |           |
|---|-----------|-----------|-----------|
| H | -3.934770 | 1.637551  | -0.787164 |
| H | -5.549813 | -0.143292 | -1.095509 |
| H | -4.181302 | -1.770504 | -2.326252 |
| H | -3.493445 | -0.151752 | -2.543821 |
| H | -2.731238 | -1.299962 | -1.431086 |
| H | -5.327601 | -2.389012 | -0.106218 |
| H | -5.463855 | -1.181800 | 1.184148  |
| H | -3.890050 | -1.893659 | 0.797780  |

ωB97XD energy = -1154.84468114 a.u.

(2S,6R,7S,8S)-1, Conf. A

|   |           |           |           |
|---|-----------|-----------|-----------|
| C | -2.637269 | -2.801024 | -0.060164 |
| C | -3.069615 | -1.364834 | -0.157764 |
| C | -3.075073 | -0.444995 | 0.816674  |
| C | -2.908660 | -0.727217 | 2.285802  |
| C | -0.323673 | -1.882584 | -0.405463 |
| C | -1.284526 | -2.980780 | -0.798751 |
| C | -1.987589 | 1.451090  | -0.448264 |
| C | -0.567847 | 1.250721  | 0.148956  |
| C | 0.363925  | 0.537501  | -0.859780 |
| C | -0.183641 | -0.823964 | -1.214624 |
| O | -2.110390 | 2.869663  | -0.723801 |
| C | -1.116561 | 3.585595  | -0.171072 |
| C | -0.145561 | 2.657642  | 0.469527  |
| O | -1.084655 | 4.793996  | -0.231406 |
| C | 0.878985  | 3.095538  | 1.198877  |
| C | -3.153645 | 1.031020  | 0.454645  |
| C | 0.267694  | -2.007833 | 0.971875  |
| O | -3.551797 | -3.693368 | -0.695315 |
| O | 1.665047  | 0.494082  | -0.248038 |
| C | 2.722030  | 0.340187  | -1.062824 |
| O | 2.622534  | 0.261963  | -2.270015 |
| C | 4.011302  | 0.282563  | -0.287194 |
| C | 4.056770  | -0.870140 | 0.732701  |
| C | 3.826329  | -2.221027 | 0.052574  |
| C | 5.389756  | -0.848800 | 1.481624  |
| H | -2.510676 | -3.097995 | 0.987227  |
| H | -3.224893 | -1.029206 | -1.184753 |
| H | -2.861891 | -1.791774 | 2.523223  |
| H | -2.005236 | -0.246783 | 2.681207  |
| H | -1.490728 | -2.941318 | -1.873393 |
| H | -0.890218 | -3.976061 | -0.565822 |
| H | -3.753352 | -0.295995 | 2.836832  |
| H | -0.613300 | 0.638474  | 1.052510  |
| H | 0.440267  | 1.142822  | -1.767830 |
| H | -0.665628 | -0.864152 | -2.188615 |
| H | 1.569818  | 2.409842  | 1.678217  |
| H | 1.041114  | 4.162040  | 1.329250  |
| H | -3.129805 | 1.644112  | 1.362816  |
| H | -2.082446 | 0.961183  | -1.418368 |
| H | -4.086741 | 1.265477  | -0.068603 |
| H | 0.824883  | -2.948567 | 1.052728  |
| H | -0.525888 | -2.051018 | 1.726998  |
| H | 0.943360  | -1.190811 | 1.224317  |
| H | -4.405976 | -3.613012 | -0.255731 |

|   |          |           |           |
|---|----------|-----------|-----------|
| H | 4.822610 | 0.180125  | -1.013500 |
| H | 4.136236 | 1.240822  | 0.230528  |
| H | 3.252487 | -0.706990 | 1.460670  |
| H | 3.857416 | -3.033092 | 0.786433  |
| H | 2.854624 | -2.266169 | -0.451842 |
| H | 4.601094 | -2.414523 | -0.699113 |
| H | 5.420396 | -1.637458 | 2.240604  |
| H | 5.550381 | 0.110597  | 1.985517  |
| H | 6.227391 | -1.013231 | 0.792954  |

ωB97XD energy = -1154.84905998 a.u.

(2S,6R,7S,8S)-1, Conf. B

|   |           |           |           |
|---|-----------|-----------|-----------|
| C | -3.801218 | -1.683917 | 0.112248  |
| C | -3.573887 | -0.207869 | -0.051121 |
| C | -3.116664 | 0.651429  | 0.869946  |
| C | -2.989657 | 0.361599  | 2.341939  |
| C | -1.330200 | -1.898255 | -0.310048 |
| C | -2.692119 | -2.463126 | -0.643212 |
| C | -1.364597 | 1.828372  | -0.510428 |
| C | -0.150822 | 1.066084  | 0.088134  |
| C | 0.341647  | -0.044256 | -0.871134 |
| C | -0.769856 | -1.024709 | -1.156834 |
| O | -0.873282 | 3.142952  | -0.876590 |
| C | 0.358569  | 3.381431  | -0.396218 |
| C | 0.851953  | 2.165330  | 0.304235  |
| O | 0.912727  | 4.446553  | -0.549686 |
| C | 1.985911  | 2.159792  | 1.001967  |
| C | -2.565109 | 1.999269  | 0.428037  |
| C | -0.794051 | -2.268902 | 1.046132  |
| O | -5.037350 | -2.113262 | -0.456741 |
| O | 1.485141  | -0.646310 | -0.238767 |
| C | 2.328484  | -1.334178 | -1.025922 |
| O | 2.188541  | -1.422948 | -2.228537 |
| C | 3.432584  | -1.984992 | -0.233831 |
| C | 4.158073  | -1.046685 | 0.744267  |
| C | 5.232762  | -1.823572 | 1.505966  |
| C | 4.759220  | 0.155457  | 0.013525  |
| H | -3.773184 | -1.965905 | 1.171086  |
| H | -3.634608 | 0.128300  | -1.087907 |
| H | -3.452127 | -0.581350 | 2.640130  |
| H | -3.466475 | 1.165556  | 2.915188  |
| H | -2.894863 | -2.362922 | -1.714559 |
| H | -2.774914 | -3.523708 | -0.380473 |
| H | -1.937756 | 0.341121  | 2.652984  |
| H | -0.421480 | 0.590843  | 1.033478  |
| H | 0.676157  | 0.410359  | -1.808227 |
| H | -1.261108 | -0.863868 | -2.113789 |
| H | 2.319124  | 1.275846  | 1.534952  |
| H | 2.602429  | 3.053103  | 1.051745  |
| H | -2.246965 | 2.584146  | 1.298666  |
| H | -1.695148 | 1.375422  | -1.446108 |
| H | -3.323925 | 2.587820  | -0.098462 |
| H | -0.573436 | -3.343504 | 1.069519  |
| H | -1.547425 | -2.090601 | 1.821813  |
| H | 0.117229  | -1.733124 | 1.312235  |
| H | -5.753539 | -1.653558 | -0.003906 |

|   |          |           |           |
|---|----------|-----------|-----------|
| H | 2.981534 | -2.819870 | 0.317294  |
| H | 4.139268 | -2.406475 | -0.954639 |
| H | 3.420635 | -0.682586 | 1.469559  |
| H | 5.738348 | -1.179087 | 2.232677  |
| H | 4.802145 | -2.672245 | 2.048548  |
| H | 5.992880 | -2.213917 | 0.818381  |
| H | 5.252271 | 0.834206  | 0.717478  |
| H | 3.995966 | 0.732023  | -0.521497 |
| H | 5.506596 | -0.171700 | -0.719489 |

ωB97XD energy = -1154.84843384 a.u.

(2S,6R,7S,8S)-1, Conf. C

|   |           |           |           |
|---|-----------|-----------|-----------|
| C | -2.552084 | -2.913200 | -0.110916 |
| C | -3.047577 | -1.502358 | -0.262554 |
| C | -3.170684 | -0.573686 | 0.695762  |
| C | -3.101187 | -0.834743 | 2.176761  |
| C | -0.268862 | -1.888665 | -0.302032 |
| C | -1.146183 | -3.032773 | -0.755582 |
| C | -2.078603 | 1.352943  | -0.513190 |
| C | -0.701838 | 1.239648  | 0.196271  |
| C | 0.339663  | 0.558796  | -0.724212 |
| C | -0.113431 | -0.829873 | -1.108290 |
| O | -2.248908 | 2.756016  | -0.837429 |
| C | -1.335118 | 3.534953  | -0.234865 |
| C | -0.377159 | 2.674363  | 0.510312  |
| O | -1.355498 | 4.741329  | -0.331105 |
| C | 0.559551  | 3.182119  | 1.308893  |
| C | -3.288648 | 0.893420  | 0.308068  |
| C | 0.219072  | -1.978558 | 1.117903  |
| O | -3.376149 | -3.860780 | -0.788150 |
| O | 1.588022  | 0.577439  | -0.007250 |
| C | 2.715318  | 0.517301  | -0.734227 |
| O | 2.722528  | 0.469053  | -1.947470 |
| C | 3.949598  | 0.496699  | 0.127807  |
| C | 4.711592  | -0.836454 | -0.005577 |
| C | 6.005910  | -0.779653 | 0.805752  |
| C | 3.840115  | -2.018325 | 0.424594  |
| H | -2.478221 | -3.187243 | 0.947805  |
| H | -3.142094 | -1.186546 | -1.303112 |
| H | -2.232381 | -0.338241 | 2.626754  |
| H | -3.057106 | -1.895979 | 2.429480  |
| H | -1.280317 | -3.006110 | -1.842030 |
| H | -0.723053 | -4.007542 | -0.489072 |
| H | -3.987119 | -0.410274 | 2.664197  |
| H | -0.784657 | 0.646949  | 1.110308  |
| H | 0.463683  | 1.159259  | -1.630027 |
| H | -0.516841 | -0.898172 | -2.116116 |
| H | 1.235472  | 2.545192  | 1.869506  |
| H | 0.660407  | 4.258376  | 1.418657  |
| H | -3.357776 | 1.517553  | 1.206324  |
| H | -2.071753 | 0.835473  | -1.473207 |
| H | -4.190409 | 1.080338  | -0.284709 |
| H | 0.834449  | -1.129616 | 1.414438  |
| H | 0.811110  | -2.892260 | 1.247467  |
| H | -0.627504 | -2.055499 | 1.810569  |
| H | -4.260289 | -3.818782 | -0.406125 |

|   |          |           |           |
|---|----------|-----------|-----------|
| H | 4.590286 | 1.320653  | -0.204128 |
| H | 3.676524 | 0.670885  | 1.172900  |
| H | 4.969494 | -0.964281 | -1.063866 |
| H | 6.567306 | -1.714184 | 0.702968  |
| H | 6.652136 | 0.040007  | 0.473299  |
| H | 5.794759 | -0.631488 | 1.872033  |
| H | 4.389021 | -2.960538 | 0.325318  |
| H | 2.933698 | -2.099243 | -0.185511 |
| H | 3.534537 | -1.914856 | 1.473030  |

ωB97XD energy = -1154.84841382 a.u.

(2S,6R,7S,8S)-1, Conf. D

|   |           |           |           |
|---|-----------|-----------|-----------|
| C | -3.900610 | -1.715949 | 0.017849  |
| C | -3.644128 | -0.257040 | -0.234630 |
| C | -3.294754 | 0.676789  | 0.660571  |
| C | -3.350320 | 0.514153  | 2.155849  |
| C | -1.402387 | -1.946113 | -0.143238 |
| C | -2.724647 | -2.550740 | -0.555743 |
| C | -1.400079 | 1.748864  | -0.615721 |
| C | -0.261926 | 1.021518  | 0.150060  |
| C | 0.319655  | -0.139862 | -0.691943 |
| C | -0.752195 | -1.154996 | -1.007110 |
| O | -0.858173 | 3.034512  | -1.013260 |
| C | 0.318420  | 3.299317  | -0.420144 |
| C | 0.721961  | 2.128881  | 0.404433  |
| O | 0.896465  | 4.350419  | -0.581848 |
| C | 1.775496  | 2.160596  | 1.218038  |
| C | -2.689733 | 1.987370  | 0.178528  |
| C | -1.015964 | -2.166627 | 1.293412  |
| O | -5.073662 | -2.187373 | -0.644612 |
| O | 1.418263  | -0.677026 | 0.068383  |
| C | 2.391800  | -1.300844 | -0.613558 |
| O | 2.373702  | -1.440625 | -1.819658 |
| C | 3.502817  | -1.778492 | 0.283781  |
| C | 4.841744  | -1.091043 | -0.047690 |
| C | 4.770874  | 0.418322  | 0.193175  |
| C | 5.966997  | -1.725908 | 0.769513  |
| H | -3.988752 | -1.916239 | 1.091796  |
| H | -3.576979 | -0.008029 | -1.295235 |
| H | -3.819650 | -0.418230 | 2.475112  |
| H | -3.918963 | 1.344016  | 2.592509  |
| H | -2.824035 | -2.547655 | -1.646185 |
| H | -2.831891 | -3.584334 | -0.208036 |
| H | -2.347318 | 0.562799  | 2.597515  |
| H | -0.634237 | 0.600637  | 1.086425  |
| H | 0.725078  | 0.261349  | -1.625251 |
| H | -1.138323 | -1.087702 | -2.021804 |
| H | 2.039983  | 1.309397  | 1.836154  |
| H | 2.394271  | 3.051714  | 1.279255  |
| H | -2.458136 | 2.634352  | 1.032281  |
| H | -1.635665 | 1.237116  | -1.549775 |
| H | -3.385489 | 2.537006  | -0.464207 |
| H | -0.869072 | -3.238377 | 1.474323  |
| H | -1.821815 | -1.844428 | 1.962779  |
| H | -0.098898 | -1.649913 | 1.576896  |
| H | -5.829247 | -1.693239 | -0.306351 |

|   |          |           |           |
|---|----------|-----------|-----------|
| H | 3.237001 | -1.606130 | 1.331155  |
| H | 3.599073 | -2.858329 | 0.126911  |
| H | 5.044540 | -1.263755 | -1.111519 |
| H | 5.717601 | 0.897514  | -0.076791 |
| H | 3.980977 | 0.894294  | -0.398801 |
| H | 4.576866 | 0.633451  | 1.251196  |
| H | 6.929576 | -1.261025 | 0.531964  |
| H | 6.052181 | -2.799260 | 0.568651  |
| H | 5.790443 | -1.595420 | 1.844402  |

ωB97XD energy = -1154.84813547 a.u.

(2S,6R,7S,8S)-1, Conf. E

|   |           |           |           |
|---|-----------|-----------|-----------|
| C | -4.152933 | -1.576966 | 0.169430  |
| C | -3.791240 | -0.119594 | 0.030639  |
| C | -3.271984 | 0.687228  | 0.962543  |
| C | -3.160969 | 0.339159  | 2.420079  |
| C | -1.676391 | -1.862454 | -0.422542 |
| C | -2.884517 | -2.485533 | 0.236803  |
| C | -1.354118 | 1.697096  | -0.310660 |
| C | -0.118220 | 1.150839  | 0.458970  |
| C | 0.269135  | -0.258990 | -0.045574 |
| C | -0.784730 | -1.240544 | 0.359310  |
| O | -0.932643 | 2.934484  | -0.938028 |
| C | 0.349008  | 3.238695  | -0.682900 |
| C | 0.926288  | 2.209822  | 0.221522  |
| O | 0.878283  | 4.224966  | -1.144498 |
| C | 2.155410  | 2.327817  | 0.721283  |
| C | -2.613081 | 1.982850  | 0.516523  |
| C | -1.662794 | -1.856021 | -1.924509 |
| O | -4.918875 | -2.009574 | -0.955309 |
| O | 1.518062  | -0.594748 | 0.596519  |
| C | 2.372172  | -1.376986 | -0.081793 |
| O | 2.145374  | -1.803217 | -1.196223 |
| C | 3.634370  | -1.651683 | 0.694025  |
| C | 4.896369  | -1.270277 | -0.099533 |
| C | 4.938065  | 0.232786  | -0.385465 |
| C | 6.145876  | -1.718989 | 0.658705  |
| H | -4.730758 | -1.757300 | 1.085353  |
| H | -3.798723 | 0.230389  | -1.003088 |
| H | -3.599531 | 1.133905  | 3.035006  |
| H | -2.109802 | 0.252371  | 2.721383  |
| H | -3.151873 | -3.442961 | -0.222783 |
| H | -2.663187 | -2.670223 | 1.292290  |
| H | -3.660070 | -0.600123 | 2.670111  |
| H | -0.339327 | 1.077136  | 1.528935  |
| H | 0.432809  | -0.231845 | -1.124301 |
| H | -0.910836 | -1.314144 | 1.439505  |
| H | 2.559467  | 1.600038  | 1.415673  |
| H | 2.778344  | 3.173014  | 0.441070  |
| H | -2.347504 | 2.609725  | 1.375218  |
| H | -1.616003 | 1.028219  | -1.135051 |
| H | -3.291911 | 2.563441  | -0.116781 |
| H | -0.744815 | -1.440448 | -2.344840 |
| H | -2.516001 | -1.291135 | -2.318130 |
| H | -1.774347 | -2.879337 | -2.299784 |
| H | -5.713337 | -1.465835 | -1.009827 |

|   |          |           |           |
|---|----------|-----------|-----------|
| H | 3.606009 | -1.118780 | 1.649324  |
| H | 3.644745 | -2.726875 | 0.908139  |
| H | 4.858640 | -1.804627 | -1.056349 |
| H | 5.825387 | 0.490917  | -0.972889 |
| H | 4.060412 | 0.568120  | -0.949634 |
| H | 4.978826 | 0.804507  | 0.550027  |
| H | 7.051278 | -1.479103 | 0.091056  |
| H | 6.138338 | -2.799413 | 0.839368  |
| H | 6.217885 | -1.214465 | 1.630180  |

ωB97XD energy = -1154.84752794 a.u.

(2S,6R,7S,8S)-1, Conf. F

|   |           |           |           |
|---|-----------|-----------|-----------|
| C | -4.109849 | -1.476776 | 0.311519  |
| C | -3.716779 | -0.022065 | 0.254212  |
| C | -3.068276 | 0.684678  | 1.186099  |
| C | -2.816170 | 0.210946  | 2.589345  |
| C | -1.715165 | -1.771204 | -0.548913 |
| C | -2.866294 | -2.412784 | 0.190835  |
| C | -1.267973 | 1.751073  | -0.211285 |
| C | 0.038411  | 1.131474  | 0.366308  |
| C | 0.320251  | -0.252648 | -0.262947 |
| C | -0.732033 | -1.222938 | 0.175671  |
| O | -0.896929 | 3.026366  | -0.791982 |
| C | 0.411877  | 3.292452  | -0.673203 |
| C | 1.071916  | 2.188091  | 0.072337  |
| O | 0.904006  | 4.304494  | -1.119971 |
| C | 2.355609  | 2.256576  | 0.419756  |
| C | -2.413514 | 1.994375  | 0.778892  |
| C | -1.855588 | -1.661331 | -2.040058 |
| O | -4.987267 | -1.800988 | -0.767183 |
| O | 1.602850  | -0.687057 | 0.243809  |
| C | 2.269298  | -1.596459 | -0.488238 |
| O | 1.883722  | -1.986124 | -1.571623 |
| C | 3.519964  | -2.075540 | 0.202914  |
| C | 4.481239  | -0.956962 | 0.638705  |
| C | 5.701864  | -1.566222 | 1.329751  |
| C | 4.896376  | -0.087921 | -0.549702 |
| H | -4.608952 | -1.715988 | 1.259709  |
| H | -3.821612 | 0.415495  | -0.739958 |
| H | -1.741187 | 0.106655  | 2.780652  |
| H | -3.290139 | -0.749680 | 2.804383  |
| H | -3.204166 | -3.333239 | -0.297234 |
| H | -2.543272 | -2.668967 | 1.204483  |
| H | -3.191896 | 0.946807  | 3.310533  |
| H | -0.059296 | 0.995743  | 1.448657  |
| H | 0.392716  | -0.157441 | -1.348001 |
| H | -0.750682 | -1.369280 | 1.255751  |
| H | 2.832049  | 1.475579  | 0.999969  |
| H | 2.952918  | 3.114785  | 0.123868  |
| H | -2.029463 | 2.534039  | 1.651654  |
| H | -1.640024 | 1.150770  | -1.045570 |
| H | -3.137364 | 2.647635  | 0.280525  |
| H | -2.008056 | -2.656590 | -2.472578 |
| H | -0.984168 | -1.213492 | -2.521358 |
| H | -2.742347 | -1.072135 | -2.302306 |
| H | -5.771801 | -1.244519 | -0.698648 |

|   |          |           |           |
|---|----------|-----------|-----------|
| H | 3.204813 | -2.653317 | 1.080603  |
| H | 4.023223 | -2.760104 | -0.485821 |
| H | 3.957064 | -0.328464 | 1.368443  |
| H | 6.383644 | -0.783096 | 1.678054  |
| H | 5.411545 | -2.169944 | 2.196690  |
| H | 6.260158 | -2.211688 | 0.640991  |
| H | 5.570678 | 0.713420  | -0.229628 |
| H | 4.033506 | 0.380447  | -1.036419 |
| H | 5.420080 | -0.687854 | -1.303840 |

ωB97XD energy = -1154.84729492 a.u.

(2S,6R,7S,8S)-1, Conf. G

|   |           |           |           |
|---|-----------|-----------|-----------|
| C | -3.067491 | -2.695173 | 0.156629  |
| C | -3.334830 | -1.212414 | 0.224848  |
| C | -3.007981 | -0.368579 | 1.209695  |
| C | -2.515297 | -0.789593 | 2.565650  |
| C | -0.817043 | -1.869075 | -0.745553 |
| C | -1.551814 | -2.998451 | -0.061675 |
| C | -1.894352 | 1.481615  | -0.087476 |
| C | -0.425021 | 1.422583  | 0.421254  |
| C | 0.386711  | 0.343759  | -0.331486 |
| C | -0.127897 | -1.016133 | 0.022627  |
| O | -2.122256 | 2.844799  | -0.526164 |
| C | -1.038368 | 3.623470  | -0.394123 |
| C | 0.064697  | 2.832790  | 0.214159  |
| O | -1.038798 | 4.786512  | -0.730558 |
| C | 1.233378  | 3.394708  | 0.518791  |
| C | -2.996878 | 1.121929  | 0.916037  |
| C | -1.061395 | -1.702360 | -2.217937 |
| O | -3.773516 | -3.280766 | -0.937625 |
| O | 1.748089  | 0.468010  | 0.134044  |
| C | 2.728757  | 0.090611  | -0.701206 |
| O | 2.530269  | -0.285924 | -1.838624 |
| C | 4.085304  | 0.172011  | -0.053284 |
| C | 4.712755  | -1.225257 | 0.125998  |
| C | 6.112044  | -1.088076 | 0.726392  |
| C | 3.826148  | -2.128138 | 0.987107  |
| H | -3.370849 | -3.196999 | 1.084554  |
| H | -3.662517 | -0.786510 | -0.725282 |
| H | -1.499361 | -0.417743 | 2.745705  |
| H | -2.505967 | -1.873894 | 2.698768  |
| H | -1.491170 | -3.931862 | -0.631506 |
| H | -1.101863 | -3.175264 | 0.919770  |
| H | -3.149372 | -0.356032 | 3.348463  |
| H | -0.405814 | 1.175146  | 1.487896  |
| H | 0.365228  | 0.544890  | -1.404555 |
| H | -0.030290 | -1.243246 | 1.084285  |
| H | 2.032869  | 2.836497  | 0.992543  |
| H | 1.400276  | 4.445366  | 0.297186  |
| H | -2.855278 | 1.704333  | 1.833093  |
| H | -2.011634 | 0.863008  | -0.981680 |
| H | -3.948225 | 1.433369  | 0.472526  |
| H | -0.840786 | -2.640228 | -2.739356 |
| H | -0.455019 | -0.913338 | -2.666901 |
| H | -2.118646 | -1.484393 | -2.410651 |
| H | -4.714810 | -3.107412 | -0.820304 |

|   |          |           |           |
|---|----------|-----------|-----------|
| H | 4.722259 | 0.780739  | -0.703461 |
| H | 4.001093 | 0.671364  | 0.916693  |
| H | 4.803922 | -1.677208 | -0.869204 |
| H | 6.590749 | -2.067944 | 0.826257  |
| H | 6.755967 | -0.461113 | 0.099987  |
| H | 6.065843 | -0.634910 | 1.724339  |
| H | 4.292624 | -3.109330 | 1.124148  |
| H | 2.843760 | -2.291812 | 0.529907  |
| H | 3.668146 | -1.687897 | 1.979498  |

ωB97XD energy = -1154.84724162 a.u.

(2S,6R,7S,8S)-1, Conf. H

|   |           |           |           |
|---|-----------|-----------|-----------|
| C | -3.161098 | -2.541488 | 0.218136  |
| C | -3.335255 | -1.047303 | 0.321036  |
| C | -2.911451 | -0.242400 | 1.301493  |
| C | -2.374732 | -0.721363 | 2.620576  |
| C | -0.920947 | -1.832992 | -0.804543 |
| C | -1.682127 | -2.930768 | -0.098243 |
| C | -1.769079 | 1.564898  | -0.030064 |
| C | -0.279749 | 1.410664  | 0.391654  |
| C | 0.426580  | 0.301837  | -0.420677 |
| C | -0.144456 | -1.034022 | -0.062077 |
| O | -1.941159 | 2.947917  | -0.430601 |
| C | -0.807341 | 3.659635  | -0.349931 |
| C | 0.280536  | 2.792892  | 0.176581  |
| O | -0.758952 | 4.827566  | -0.665065 |
| C | 1.496919  | 3.279099  | 0.418501  |
| C | -2.828709 | 1.250676  | 1.032641  |
| C | -1.227417 | -1.632478 | -2.260831 |
| O | -3.968185 | -3.067758 | -0.835588 |
| O | 1.814719  | 0.332263  | -0.026637 |
| C | 2.734720  | -0.030946 | -0.935628 |
| O | 2.469662  | -0.269833 | -2.095956 |
| C | 4.107277  | -0.109860 | -0.321517 |
| C | 4.200813  | -1.159123 | 0.804305  |
| C | 3.772032  | -2.542615 | 0.310354  |
| C | 5.622611  | -1.188804 | 1.366263  |
| H | -3.434191 | -3.038096 | 1.158302  |
| H | -3.686340 | -0.587551 | -0.604573 |
| H | -1.319059 | -0.447225 | 2.737877  |
| H | -2.457465 | -1.803888 | 2.743784  |
| H | -1.712078 | -3.853551 | -0.687568 |
| H | -1.186699 | -3.156188 | 0.850991  |
| H | -2.914252 | -0.241754 | 3.446110  |
| H | -0.216368 | 1.144150  | 1.452214  |
| H | 0.358846  | 0.525185  | -1.487062 |
| H | -0.003742 | -1.286767 | 0.988896  |
| H | 2.287284  | 2.664090  | 0.833778  |
| H | 1.713298  | 4.321889  | 0.202707  |
| H | -2.596430 | 1.805592  | 1.948398  |
| H | -1.974660 | 0.972841  | -0.926204 |
| H | -3.784796 | 1.626656  | 0.653669  |
| H | -2.283919 | -1.376222 | -2.402999 |
| H | -1.063414 | -2.569955 | -2.803801 |
| H | -0.613878 | -0.858692 | -2.726261 |
| H | -4.888727 | -2.844339 | -0.655322 |

|   |          |           |           |
|---|----------|-----------|-----------|
| H | 4.811436 | -0.350137 | -1.122909 |
| H | 4.363795 | 0.879302  | 0.074983  |
| H | 3.517729 | -0.851461 | 1.605349  |
| H | 3.854035 | -3.283710 | 1.112495  |
| H | 2.733052 | -2.549394 | -0.039094 |
| H | 4.406202 | -2.873348 | -0.521209 |
| H | 5.699614 | -1.906349 | 2.189945  |
| H | 5.925578 | -0.206683 | 1.745617  |
| H | 6.341708 | -1.488886 | 0.594496  |

ωB97XD energy = -1154.84715224 a.u.

(2S,6R,7S,8S)-1, Conf. I

|   |           |           |           |
|---|-----------|-----------|-----------|
| C | -2.555199 | -2.887005 | -0.179576 |
| C | -3.006395 | -1.469029 | -0.391293 |
| C | -3.189206 | -0.523338 | 0.540313  |
| C | -3.244457 | -0.759516 | 2.025742  |
| C | -0.246984 | -1.898881 | -0.190177 |
| C | -1.098707 | -3.042254 | -0.691320 |
| C | -1.973237 | 1.369192  | -0.608999 |
| C | -0.654878 | 1.245879  | 0.204004  |
| C | 0.442262  | 0.526323  | -0.618001 |
| C | -0.000047 | -0.864817 | -1.005804 |
| O | -2.099407 | 2.771139  | -0.959802 |
| C | -1.219148 | 3.544715  | -0.302937 |
| C | -0.326397 | 2.680126  | 0.515699  |
| O | -1.215795 | 4.750108  | -0.412856 |
| C | 0.568536  | 3.183787  | 1.363499  |
| C | -3.249767 | 0.938730  | 0.123160  |
| C | 0.107022  | -1.956039 | 1.270256  |
| O | -3.332925 | -3.826433 | -0.920429 |
| O | 1.637176  | 0.542937  | 0.184691  |
| C | 2.814219  | 0.558103  | -0.466370 |
| O | 2.900643  | 0.568962  | -1.677574 |
| C | 3.985005  | 0.549515  | 0.481274  |
| C | 4.664872  | -0.836755 | 0.589773  |
| C | 3.683253  | -1.907531 | 1.069268  |
| C | 5.351003  | -1.260231 | -0.709740 |
| H | -2.587021 | -3.149517 | 0.884019  |
| H | -3.006982 | -1.167276 | -1.440150 |
| H | -3.234790 | -1.816400 | 2.299623  |
| H | -4.160759 | -0.315282 | 2.432808  |
| H | -1.134897 | -3.043152 | -1.785789 |
| H | -0.716533 | -4.014978 | -0.362353 |
| H | -2.407929 | -0.264004 | 2.534313  |
| H | -0.820069 | 0.676287  | 1.121357  |
| H | 0.642691  | 1.102185  | -1.525737 |
| H | -0.309750 | -0.955363 | -2.044656 |
| H | 1.197718  | 2.542764  | 1.972102  |
| H | 0.682690  | 4.259527  | 1.464704  |
| H | -3.379182 | 1.577678  | 1.003995  |
| H | -1.901517 | 0.841460  | -1.561214 |
| H | -4.099240 | 1.129925  | -0.541295 |
| H | 0.682393  | -2.866578 | 1.475992  |
| H | -0.800772 | -2.016656 | 1.881476  |
| H | 0.696430  | -1.101751 | 1.601649  |
| H | -4.245937 | -3.767896 | -0.616544 |



|   |          |           |           |
|---|----------|-----------|-----------|
| H | 4.708290 | 1.281201  | 0.109319  |
| H | 3.645757 | 0.866243  | 1.470967  |
| H | 5.439787 | -0.716910 | 1.357212  |
| H | 4.200325 | -2.858237 | 1.235970  |
| H | 3.198191 | -1.617129 | 2.006993  |
| H | 2.898939 | -2.084714 | 0.323615  |
| H | 5.899236 | -2.196531 | -0.559385 |
| H | 6.062477 | -0.501712 | -1.052991 |
| H | 4.622434 | -1.422733 | -1.510867 |

ωB97XD energy = -1154.84685633 a.u.

(2S,6R,7S,8S)-1, Conf. J

|   |           |           |           |
|---|-----------|-----------|-----------|
| C | -3.618615 | -2.295968 | 0.179558  |
| C | -3.630362 | -0.790932 | 0.087290  |
| C | -3.287938 | 0.088739  | 1.034664  |
| C | -3.039077 | -0.265203 | 2.473800  |
| C | -1.172350 | -1.946709 | -0.500423 |
| C | -2.164323 | -2.865546 | 0.174675  |
| C | -1.729222 | 1.581436  | -0.253308 |
| C | -0.367665 | 1.328796  | 0.454854  |
| C | 0.334881  | 0.075301  | -0.122304 |
| C | -0.427616 | -1.148446 | 0.275645  |
| O | -1.647569 | 2.905658  | -0.838259 |
| C | -0.472239 | 3.508045  | -0.604085 |
| C | 0.375971  | 2.619367  | 0.234435  |
| O | -0.219989 | 4.612394  | -1.031055 |
| C | 1.558777  | 3.019186  | 0.698735  |
| C | -2.986187 | 1.520750  | 0.622678  |
| C | -1.224827 | -1.891495 | -2.000895 |
| O | -4.297532 | -2.870036 | -0.937947 |
| O | 1.650058  | 0.014129  | 0.470829  |
| C | 2.711035  | -0.125117 | -0.340961 |
| O | 2.626357  | -0.218341 | -1.548456 |
| C | 4.006884  | -0.127800 | 0.429320  |
| C | 4.985260  | -1.210907 | -0.049538 |
| C | 6.336809  | -1.038129 | 0.644232  |
| C | 4.416596  | -2.611466 | 0.190561  |
| H | -4.100538 | -2.640984 | 1.103451  |
| H | -3.763401 | -0.420950 | -0.930893 |
| H | -3.254068 | -1.312869 | 2.696864  |
| H | -1.995587 | -0.068443 | 2.748732  |
| H | -2.208414 | -3.847271 | -0.308799 |
| H | -1.862895 | -3.017373 | 1.215478  |
| H | -3.658601 | 0.358617  | 3.129191  |
| H | -0.521809 | 1.163674  | 1.526276  |
| H | 0.447578  | 0.180201  | -1.202048 |
| H | -0.486865 | -1.286151 | 1.355227  |
| H | 2.161887  | 2.391959  | 1.346086  |
| H | 1.939835  | 4.002065  | 0.435356  |
| H | -2.848642 | 2.164704  | 1.498466  |
| H | -1.851470 | 0.897318  | -1.097299 |
| H | -3.812216 | 1.935259  | 0.035442  |
| H | -0.449586 | -1.256506 | -2.434618 |
| H | -2.202330 | -1.530425 | -2.342081 |
| H | -1.108537 | -2.899534 | -2.414171 |
| H | -5.204299 | -2.541842 | -0.943964 |

|   |          |           |           |
|---|----------|-----------|-----------|
| H | 4.452009 | 0.864954  | 0.283243  |
| H | 3.797441 | -0.240933 | 1.497589  |
| H | 5.128060 | -1.075041 | -1.127905 |
| H | 7.053865 | -1.786668 | 0.291034  |
| H | 6.763708 | -0.047797 | 0.451576  |
| H | 6.237514 | -1.157639 | 1.730289  |
| H | 5.111054 | -3.378738 | -0.167445 |
| H | 3.464097 | -2.758836 | -0.330181 |
| H | 4.246851 | -2.784600 | 1.260593  |

ωB97XD energy = -1154.84669958 a.u.

(2S,6R,7S,8S)-1, Conf. K

|   |           |           |           |
|---|-----------|-----------|-----------|
| C | -3.839735 | -1.688760 | -0.042201 |
| C | -3.571536 | -0.243099 | -0.351023 |
| C | -3.264883 | 0.733714  | 0.513242  |
| C | -3.388685 | 0.644646  | 2.010530  |
| C | -1.336060 | -1.926231 | -0.047417 |
| C | -2.634296 | -2.547398 | -0.509218 |
| C | -1.305472 | 1.738939  | -0.712205 |
| C | -0.213030 | 1.062885  | 0.160263  |
| C | 0.419050  | -0.141836 | -0.577748 |
| C | -0.640465 | -1.167107 | -0.903780 |
| O | -0.741079 | 2.999122  | -1.156503 |
| C | 0.395135  | 3.306600  | -0.508136 |
| C | 0.745399  | 2.192656  | 0.413422  |
| O | 0.981425  | 4.348350  | -0.698641 |
| C | 1.731831  | 2.288605  | 1.302092  |
| C | -2.636568 | 2.019228  | -0.005012 |
| C | -1.026227 | -2.101784 | 1.414321  |
| O | -4.975729 | -2.195146 | -0.742471 |
| O | 1.465259  | -0.640558 | 0.276565  |
| C | 2.366946  | -1.462037 | -0.289672 |
| O | 2.329510  | -1.770996 | -1.463371 |
| C | 3.412554  | -1.925330 | 0.691275  |
| C | 4.767870  | -1.195980 | 0.527390  |
| C | 5.435238  | -1.483311 | -0.818485 |
| C | 4.633988  | 0.308929  | 0.768089  |
| H | -3.985150 | -1.837465 | 1.033880  |
| H | -3.453354 | -0.044314 | -1.417723 |
| H | -2.406813 | 0.723036  | 2.493541  |
| H | -3.867011 | -0.274012 | 2.355000  |
| H | -2.670025 | -2.594198 | -1.602699 |
| H | -2.764053 | -3.564276 | -0.121874 |
| H | -3.981301 | 1.490851  | 2.378725  |
| H | -0.640682 | 0.693035  | 1.094449  |
| H | 0.882804  | 0.207843  | -1.505438 |
| H | -0.970449 | -1.141640 | -1.939848 |
| H | 1.953273  | 1.481807  | 1.991959  |
| H | 2.337535  | 3.189266  | 1.354355  |
| H | -2.453368 | 2.714460  | 0.822232  |
| H | -1.491332 | 1.172315  | -1.625502 |
| H | -3.296108 | 2.528831  | -0.715383 |
| H | -0.845144 | -3.163317 | 1.624000  |
| H | -1.883557 | -1.805058 | 2.029491  |
| H | -0.149741 | -1.541821 | 1.740988  |
| H | -5.748101 | -1.686945 | -0.469452 |

|   |          |           |           |
|---|----------|-----------|-----------|
| H | 3.039270 | -1.779429 | 1.708333  |
| H | 3.557610 | -2.996701 | 0.523162  |
| H | 5.411385 | -1.608179 | 1.314560  |
| H | 6.438917 | -1.045614 | -0.842472 |
| H | 5.530788 | -2.559671 | -0.996377 |
| H | 4.863716 | -1.057829 | -1.649527 |
| H | 5.613073 | 0.796130  | 0.713567  |
| H | 4.206775 | 0.518399  | 1.754340  |
| H | 3.989635 | 0.778347  | 0.014722  |

ωB97XD energy = -1154.84644806 a.u.

(2S,6R,7S,8S)-1, Conf. L

|   |           |           |           |
|---|-----------|-----------|-----------|
| C | -3.493259 | -2.272794 | -0.077745 |
| C | -3.549280 | -0.783572 | -0.275457 |
| C | -3.381244 | 0.166473  | 0.653426  |
| C | -3.371183 | -0.067032 | 2.140260  |
| C | -0.989607 | -1.973430 | -0.195079 |
| C | -2.153763 | -2.817146 | -0.660729 |
| C | -1.751232 | 1.665743  | -0.560923 |
| C | -0.483539 | 1.188816  | 0.199494  |
| C | 0.330675  | 0.175039  | -0.638559 |
| C | -0.517411 | -1.017887 | -1.006192 |
| O | -1.510343 | 3.049617  | -0.918961 |
| C | -0.418411 | 3.552327  | -0.319755 |
| C | 0.247659  | 2.476745  | 0.463975  |
| O | -0.091022 | 4.710519  | -0.448585 |
| C | 1.299141  | 2.718036  | 1.244591  |
| C | -3.067222 | 1.591614  | 0.222997  |
| C | -0.565398 | -2.199158 | 1.230989  |
| O | -4.597726 | -2.958541 | -0.660350 |
| O | 1.480769  | -0.163302 | 0.157945  |
| C | 2.516573  | -0.739475 | -0.474283 |
| O | 2.548095  | -0.910608 | -1.675080 |
| C | 3.583169  | -1.171692 | 0.498428  |
| C | 5.000518  | -1.154188 | -0.083976 |
| C | 5.439026  | 0.271585  | -0.425443 |
| C | 5.974861  | -1.806920 | 0.897654  |
| H | -3.544624 | -2.523878 | 0.983009  |
| H | -3.548772 | -0.478047 | -1.325176 |
| H | -2.383017 | 0.143153  | 2.568200  |
| H | -3.658180 | -1.081486 | 2.422875  |
| H | -2.226039 | -2.787989 | -1.754576 |
| H | -2.051420 | -3.865170 | -0.357986 |
| H | -4.071723 | 0.624936  | 2.622616  |
| H | -0.761947 | 0.696264  | 1.134067  |
| H | 0.684215  | 0.663234  | -1.551719 |
| H | -0.904809 | -0.979942 | -2.021938 |
| H | 1.767949  | 1.931406  | 1.825996  |
| H | 1.708613  | 3.722224  | 1.313533  |
| H | -2.988709 | 2.244929  | 1.099228  |
| H | -1.863652 | 1.139801  | -1.510132 |
| H | -3.860260 | 1.998641  | -0.413361 |
| H | -0.097705 | -3.187645 | 1.321248  |
| H | -1.434337 | -2.205102 | 1.898232  |
| H | 0.146900  | -1.457900 | 1.593318  |
| H | -4.629807 | -2.748488 | -1.601699 |

|   |          |           |           |
|---|----------|-----------|-----------|
| H | 3.523526 | -0.550651 | 1.398635  |
| H | 3.310633 | -2.192072 | 0.801352  |
| H | 4.990294 | -1.744466 | -1.007739 |
| H | 6.447370 | 0.276238  | -0.852378 |
| H | 4.768176 | 0.738180  | -1.154253 |
| H | 5.454082 | 0.899136  | 0.474689  |
| H | 6.990225 | -1.818618 | 0.487736  |
| H | 5.689512 | -2.841342 | 1.118772  |
| H | 6.004876 | -1.255303 | 1.845669  |

ωB97XD energy = -1154.84615219 a.u.

(2S,6R,7S,8S)-1, Conf. M

|   |           |           |           |
|---|-----------|-----------|-----------|
| C | -2.811627 | -2.819445 | 0.107687  |
| C | -3.167323 | -1.354511 | 0.149361  |
| C | -2.929857 | -0.483427 | 1.136153  |
| C | -2.462683 | -0.860984 | 2.513920  |
| C | -0.580939 | -1.874429 | -0.725019 |
| C | -1.273987 | -3.035573 | -0.050993 |
| C | -1.886434 | 1.414993  | -0.146714 |
| C | -0.435350 | 1.451449  | 0.411704  |
| C | 0.463279  | 0.416218  | -0.301255 |
| C | 0.018851  | -0.967490 | 0.055980  |
| O | -2.178937 | 2.754557  | -0.617336 |
| C | -1.151773 | 3.601527  | -0.453282 |
| C | -0.025298 | 2.886499  | 0.203257  |
| O | -1.212215 | 4.759231  | -0.802432 |
| C | 1.098252  | 3.518414  | 0.538664  |
| C | -2.999122 | 1.002374  | 0.824611  |
| C | -0.770129 | -1.745548 | -2.209140 |
| O | -3.441184 | -3.454568 | -1.005639 |
| O | 1.800437  | 0.624609  | 0.200470  |
| C | 2.823726  | 0.287784  | -0.603084 |
| O | 2.674192  | -0.081597 | -1.750480 |
| C | 4.149829  | 0.403181  | 0.100117  |
| C | 4.621564  | -0.940947 | 0.708840  |
| C | 3.650814  | -1.467776 | 1.768331  |
| C | 4.889236  | -2.000418 | -0.361965 |
| H | -3.119595 | -3.329913 | 1.029453  |
| H | -3.482868 | -0.957717 | -0.817384 |
| H | -1.483137 | -0.417178 | 2.729116  |
| H | -2.381891 | -1.941068 | 2.656357  |
| H | -1.137636 | -3.971753 | -0.602757 |
| H | -0.851243 | -3.172503 | 0.948845  |
| H | -3.156172 | -0.468696 | 3.267727  |
| H | -0.437099 | 1.217525  | 1.481371  |
| H | 0.461887  | 0.602895  | -1.376994 |
| H | 0.081161  | -1.170645 | 1.125113  |
| H | 1.912034  | 3.009968  | 1.043263  |
| H | 1.214085  | 4.574325  | 0.309805  |
| H | -2.924777 | 1.602747  | 1.738102  |
| H | -1.933551 | 0.775287  | -1.032548 |
| H | -3.951824 | 1.249782  | 0.345189  |
| H | -0.467463 | -2.674599 | -2.704497 |
| H | -0.195425 | -0.926065 | -2.645017 |
| H | -1.829621 | -1.597872 | -2.450278 |
| H | -4.394906 | -3.340038 | -0.921416 |

|   |          |           |           |
|---|----------|-----------|-----------|
| H | 4.882625 | 0.742805  | -0.636807 |
| H | 4.072937 | 1.152992  | 0.892409  |
| H | 5.572839 | -0.711787 | 1.204698  |
| H | 4.071034 | -2.349392 | 2.263633  |
| H | 3.441661 | -0.714642 | 2.535614  |
| H | 2.696480 | -1.764494 | 1.318124  |
| H | 5.325231 | -2.896900 | 0.091798  |
| H | 5.585629 | -1.634096 | -1.123769 |
| H | 3.965082 | -2.298171 | -0.868852 |

$\omega$ B97XD energy = -1154.84605016 a.u.

(1R,5S,6S,7S,10R)-2, Conf. A

|   |           |           |           |
|---|-----------|-----------|-----------|
| C | 3.457263  | 0.014533  | -0.232780 |
| C | 2.935023  | 1.391198  | -0.671879 |
| C | 1.585630  | 1.654777  | -0.053032 |
| C | 0.570777  | 0.582693  | -0.402477 |
| C | 1.046135  | -0.783477 | 0.183303  |
| C | 2.426697  | -1.084769 | -0.464149 |
| C | -0.886285 | 0.927769  | -0.065163 |
| C | -1.849801 | -0.190549 | -0.478257 |
| C | -1.405373 | -1.529189 | 0.120982  |
| C | 0.039627  | -1.868082 | -0.243525 |
| C | -3.327890 | 0.164217  | -0.186559 |
| C | -4.287093 | -0.834058 | -0.843086 |
| C | -3.649464 | 0.301842  | 1.305453  |
| O | -1.295124 | 2.100775  | -0.770000 |
| C | 1.372628  | 2.677159  | 0.782180  |
| O | 3.007525  | -2.293757 | 0.015063  |
| H | 0.599156  | 0.472558  | -1.499237 |
| C | 1.161603  | -0.746320 | 1.713640  |
| H | 3.721824  | 0.039879  | 0.830566  |
| H | 4.368796  | -0.236490 | -0.784548 |
| H | 3.651107  | 2.170398  | -0.395236 |
| H | 2.836637  | 1.405726  | -1.766040 |
| H | 2.257489  | -1.176158 | -1.549718 |
| H | -0.978991 | 1.105840  | 1.016164  |
| H | -1.757157 | -0.273839 | -1.572767 |
| H | -2.059624 | -2.327660 | -0.243482 |
| H | -1.520411 | -1.511340 | 1.210982  |
| H | 0.107660  | -2.002786 | -1.332859 |
| H | 0.309551  | -2.826691 | 0.217360  |
| H | -3.502204 | 1.140196  | -0.653200 |
| H | -4.247326 | -1.816579 | -0.358893 |
| H | -5.320509 | -0.477414 | -0.770471 |
| H | -4.056471 | -0.972956 | -1.905751 |
| H | -4.687415 | 0.625580  | 1.440006  |
| H | -3.012495 | 1.041894  | 1.800871  |
| H | -3.534830 | -0.651707 | 1.833950  |
| H | -0.641150 | 2.792736  | -0.619195 |
| H | 0.423886  | 2.836897  | 1.289316  |
| H | 2.165467  | 3.385526  | 1.009963  |
| H | 2.467573  | -3.037032 | -0.274248 |
| H | 1.531621  | -1.707099 | 2.084151  |
| H | 1.847110  | 0.032165  | 2.057067  |
| H | 0.194652  | -0.554244 | 2.186841  |

$\omega$ B97XD energy = -737.573101461 a.u.

(1R,5S,6S,7S,10R)-2, Conf. B

|   |           |           |           |
|---|-----------|-----------|-----------|
| C | 3.409284  | 0.427086  | -0.240900 |
| C | 2.671034  | 1.725021  | -0.599638 |
| C | 1.308831  | 1.739680  | 0.046868  |
| C | 0.466012  | 0.544535  | -0.359227 |
| C | 1.159580  | -0.762627 | 0.134690  |
| C | 2.560848  | -0.803987 | -0.536442 |
| C | -1.021158 | 0.637980  | 0.013894  |
| C | -1.811865 | -0.583318 | -0.467735 |
| C | -1.145327 | -1.875988 | 0.022987  |
| C | 0.330138  | -1.961422 | -0.360662 |
| C | -3.318479 | -0.573273 | -0.094752 |
| C | -3.585225 | -0.179344 | 1.362182  |
| C | -4.182188 | 0.267680  | -1.040355 |
| O | -1.607695 | 1.788535  | -0.594954 |
| C | 0.961471  | 2.665119  | 0.947668  |
| O | 3.328758  | -1.935098 | -0.138106 |
| H | 0.490991  | 0.506197  | -1.460945 |
| C | 1.287236  | -0.806436 | 1.663982  |
| H | 3.676108  | 0.433674  | 0.822055  |
| H | 4.343702  | 0.354918  | -0.806662 |
| H | 3.261040  | 2.592240  | -0.288714 |
| H | 2.551674  | 1.781425  | -1.690470 |
| H | 2.391715  | -0.852081 | -1.624923 |
| H | -1.118056 | 0.718551  | 1.106696  |
| H | -1.744380 | -0.576182 | -1.566288 |
| H | -1.676477 | -2.731320 | -0.409652 |
| H | -1.257524 | -1.965386 | 1.110430  |
| H | 0.407433  | -2.012720 | -1.456581 |
| H | 0.750996  | -2.894648 | 0.035555  |
| H | -3.649878 | -1.614938 | -0.211035 |
| H | -2.972185 | -0.754463 | 2.065153  |
| H | -3.386004 | 0.885428  | 1.527737  |
| H | -4.635260 | -0.360370 | 1.616908  |
| H | -3.969567 | 1.333854  | -0.928397 |
| H | -5.245917 | 0.102814  | -0.831449 |
| H | -4.002478 | -0.001362 | -2.087500 |
| H | -1.040452 | 2.547714  | -0.416406 |
| H | 0.012255  | 2.650000  | 1.477923  |
| H | 1.645308  | 3.469344  | 1.207896  |
| H | 2.897160  | -2.734122 | -0.459038 |
| H | 1.827846  | -1.707295 | 1.969207  |
| H | 1.824836  | 0.059479  | 2.058047  |
| H | 0.307463  | -0.822488 | 2.149566  |

$\omega$ B97XD energy = -737.571120275 a.u.

(1R,5S,6R,7R,8R,10R)-3, Conf. A

|   |          |           |           |
|---|----------|-----------|-----------|
| C | 3.389482 | -2.459176 | 0.007670  |
| C | 4.051201 | -1.212103 | 0.612772  |
| C | 3.023448 | -0.213969 | 1.087208  |
| C | 2.046540 | 0.154815  | -0.005448 |
| C | 1.251825 | -1.121655 | -0.479082 |
| C | 2.321872 | -2.106581 | -1.028195 |

|   |           |           |           |
|---|-----------|-----------|-----------|
| C | 1.037156  | 1.243806  | 0.284141  |
| C | 0.260564  | 1.604147  | -0.979512 |
| C | -0.609568 | 0.461313  | -1.450541 |
| C | 0.277226  | -0.777781 | -1.635986 |
| O | 1.596385  | 2.516813  | 0.700183  |
| C | 0.751170  | 3.508322  | 0.331179  |
| C | -0.276738 | 2.949507  | -0.604785 |
| O | 1.744066  | -3.279195 | -1.587346 |
| C | 2.985013  | 0.253258  | 2.336419  |
| C | -1.397318 | 3.581117  | -0.940412 |
| O | 0.886121  | 4.644175  | 0.720943  |
| H | 2.645584  | 0.489067  | -0.867456 |
| C | 0.478270  | -1.768339 | 0.682848  |
| O | -1.640315 | 0.249490  | -0.465149 |
| C | -2.871494 | -0.075468 | -0.889684 |
| O | -3.158373 | -0.214449 | -2.062084 |
| C | -3.833054 | -0.227374 | 0.260605  |
| C | -3.375353 | -1.243755 | 1.321637  |
| C | -4.403088 | -1.315042 | 2.451463  |
| C | -3.140417 | -2.621626 | 0.700485  |
| H | 2.936108  | 3.056900  | 0.808848  |
| H | 4.144767  | -3.089128 | -0.472790 |
| H | 4.670518  | -0.732806 | -0.158451 |
| H | 4.718748  | -1.498978 | 1.430364  |
| H | 2.809727  | -1.611836 | -1.877846 |
| H | 0.352835  | 0.937892  | 1.082620  |
| H | 1.006449  | 1.762181  | -1.773163 |
| H | -1.094229 | 0.701999  | -2.398659 |
| H | 0.861385  | -0.591591 | -2.546417 |
| H | -0.353747 | -1.644917 | -1.849693 |
| H | 1.476088  | -3.867649 | -0.871861 |
| H | 3.714389  | -0.073231 | 3.073817  |
| H | 2.247472  | 0.979281  | 2.664884  |
| H | -2.122233 | 3.129935  | -1.612148 |
| H | -1.613301 | 4.569334  | -0.544342 |
| H | -0.333941 | -1.128751 | 1.031297  |
| H | 1.120678  | -1.984017 | 1.539815  |
| H | 0.016505  | -2.705277 | 0.354054  |
| H | -3.954005 | 0.759440  | 0.723584  |
| H | -4.797374 | -0.524683 | -0.161029 |
| H | -2.429382 | -0.884818 | 1.743538  |
| H | -4.076596 | -2.014836 | 3.227906  |
| H | -4.550646 | -0.336409 | 2.920987  |
| H | -5.374286 | -1.660336 | 2.076371  |
| H | -2.388911 | -2.587337 | -0.095878 |
| H | -4.067544 | -3.017094 | 0.268118  |
| H | -2.788542 | -3.333708 | 1.454467  |

ωB97XD energy = -1154.88226567 a.u.

(1R,5S,6R,7R,8R,10R)-3, Conf. B

|   |          |           |           |
|---|----------|-----------|-----------|
| C | 4.265695 | -1.259219 | 0.432457  |
| C | 4.396169 | 0.233665  | 0.768801  |
| C | 3.054126 | 0.852517  | 1.073508  |
| C | 2.056876 | 0.625478  | -0.038974 |
| C | 1.806379 | -0.918208 | -0.237672 |
| C | 3.184954 | -1.529334 | -0.615363 |

|   |           |           |           |
|---|-----------|-----------|-----------|
| C | 0.707331  | 1.300993  | 0.074299  |
| C | -0.105942 | 1.100788  | -1.202614 |
| C | -0.467056 | -0.352143 | -1.413046 |
| C | 0.828073  | -1.174461 | -1.412765 |
| O | 0.741471  | 2.744961  | 0.216805  |
| C | -0.403577 | 3.260783  | -0.289851 |
| C | -1.119132 | 2.194380  | -1.061957 |
| O | 3.098406  | -2.917921 | -0.909140 |
| C | 2.791040  | 1.494839  | 2.213160  |
| C | -2.378714 | 2.295592  | -1.474839 |
| O | -0.715753 | 4.416132  | -0.122133 |
| H | 2.525123  | 0.990451  | -0.966693 |
| C | 1.267186  | -1.575461 | 1.046210  |
| O | -1.353903 | -0.731685 | -0.344363 |
| C | -2.205643 | -1.746804 | -0.545685 |
| O | -2.274520 | -2.361922 | -1.591162 |
| C | -3.036333 | -2.010626 | 0.682949  |
| C | -3.785039 | -0.768354 | 1.199444  |
| C | -4.777287 | -0.249555 | 0.156968  |
| C | -4.489346 | -1.093795 | 2.517029  |
| H | 4.036360  | -1.820903 | 1.346959  |
| H | 5.217815  | -1.643650 | 0.052865  |
| H | 4.829282  | 0.752368  | -0.098086 |
| H | 5.086468  | 0.372906  | 1.605621  |
| H | 3.493641  | -1.068229 | -1.562230 |
| H | 0.157892  | 0.924280  | 0.943244  |
| H | 0.550825  | 1.373456  | -2.042118 |
| H | -0.990658 | -0.497815 | -2.361152 |
| H | 1.337911  | -0.937268 | -2.355387 |
| H | 0.582036  | -2.238235 | -1.456789 |
| H | 3.015523  | -3.406319 | -0.081700 |
| H | 3.554995  | 1.602064  | 2.979579  |
| H | 1.825160  | 1.946801  | 2.417449  |
| H | -2.858565 | 1.494227  | -2.028695 |
| H | -2.960036 | 3.188706  | -1.263989 |
| H | 1.102645  | -2.645504 | 0.878319  |
| H | 0.305252  | -1.156383 | 1.345550  |
| H | 1.950498  | -1.459821 | 1.890747  |
| H | -3.740373 | -2.811795 | 0.440756  |
| H | -2.355955 | -2.380367 | 1.460057  |
| H | -3.042103 | 0.015628  | 1.388365  |
| H | -5.550883 | -0.998942 | -0.050523 |
| H | -5.273500 | 0.659789  | 0.511201  |
| H | -4.285436 | -0.009039 | -0.792015 |
| H | -3.776123 | -1.430881 | 3.277071  |
| H | -5.235182 | -1.886444 | 2.379968  |
| H | -5.006788 | -0.212054 | 2.909218  |

ωB97XD energy = -1154.88212999 a.u.

(1R,5S,6R,7R,8R,10R)-3, Conf. C

|   |          |           |           |
|---|----------|-----------|-----------|
| C | 4.452420 | -0.671249 | 0.389649  |
| C | 4.310640 | 0.844241  | 0.596959  |
| C | 2.883367 | 1.230249  | 0.899033  |
| C | 1.925697 | 0.725256  | -0.155070 |
| C | 1.960512 | -0.849328 | -0.212191 |
| C | 3.420376 | -1.224752 | -0.594201 |

|   |           |           |           |
|---|-----------|-----------|-----------|
| C | 0.478118  | 1.155061  | -0.059554 |
| C | -0.298952 | 0.704258  | -1.294444 |
| C | -0.405060 | -0.807563 | -1.351684 |
| C | 1.014903  | -1.386172 | -1.318431 |
| O | 0.257929  | 2.588538  | -0.030790 |
| C | -0.958342 | 2.856362  | -0.561411 |
| C | -1.476552 | 1.629114  | -1.245876 |
| O | 3.591122  | -2.624668 | -0.777922 |
| C | 2.527434  | 1.909725  | 1.990810  |
| C | -2.727451 | 1.503494  | -1.678902 |
| O | -1.468133 | 3.948846  | -0.475522 |
| H | 2.304877  | 1.084522  | -1.125090 |
| C | 1.587551  | -1.471865 | 1.145372  |
| O | -1.147783 | -1.288623 | -0.214026 |
| C | -2.385447 | -1.778933 | -0.386130 |
| O | -2.933493 | -1.856572 | -1.468115 |
| C | -2.992645 | -2.211795 | 0.923227  |
| C | -3.673939 | -1.065015 | 1.708971  |
| C | -2.682770 | -0.001737 | 2.188374  |
| C | -4.822451 | -0.431155 | 0.922096  |
| H | 4.347860  | -1.183860 | 1.354553  |
| H | 5.452274  | -0.905208 | 0.010546  |
| H | 4.621759  | 1.354658  | -0.325219 |
| H | 4.980467  | 1.180841  | 1.393458  |
| H | 3.614773  | -0.792796 | -1.584294 |
| H | 0.015046  | 0.759091  | 0.850317  |
| H | 0.299390  | 0.994715  | -2.171526 |
| H | -0.917154 | -1.132708 | -2.259119 |
| H | 1.456833  | -1.164665 | -2.298028 |
| H | 0.953618  | -2.475372 | -1.245368 |
| H | 3.632735  | -3.048370 | 0.087420  |
| H | 3.272656  | 2.224524  | 2.717290  |
| H | 1.497179  | 2.186553  | 2.193195  |
| H | -3.069936 | 0.596372  | -2.167271 |
| H | -3.439539 | 2.312735  | -1.542544 |
| H | 0.555753  | -1.251445 | 1.422186  |
| H | 2.231493  | -1.117713 | 1.953387  |
| H | 1.667544  | -2.563012 | 1.091579  |
| H | -3.735816 | -2.978685 | 0.691793  |
| H | -2.209201 | -2.656537 | 1.543841  |
| H | -4.100192 | -1.549137 | 2.596512  |
| H | -3.179743 | 0.700230  | 2.866176  |
| H | -1.838748 | -0.449857 | 2.724039  |
| H | -2.283891 | 0.576493  | 1.348372  |
| H | -5.541966 | -1.184374 | 0.584191  |
| H | -4.452732 | 0.098998  | 0.037255  |
| H | -5.356922 | 0.294662  | 1.543774  |

ωB97XD energy = -1154.88198224 a.u.

(1R,5S,6R,7R,8R,10R)-3, Conf. D

|   |          |           |           |
|---|----------|-----------|-----------|
| C | 2.885083 | -3.046372 | -0.010820 |
| C | 3.829223 | -1.963560 | 0.531914  |
| C | 3.063308 | -0.761888 | 1.028804  |
| C | 2.131194 | -0.204859 | -0.022276 |
| C | 1.062033 | -1.286946 | -0.436175 |
| C | 1.870027 | -2.486320 | -1.007359 |

|   |           |           |           |
|---|-----------|-----------|-----------|
| C | 1.390406  | 1.074534  | 0.299529  |
| C | 0.636512  | 1.582828  | -0.926576 |
| C | -0.470922 | 0.642822  | -1.344655 |
| C | 0.133497  | -0.752594 | -1.557098 |
| O | 2.228265  | 2.204339  | 0.658332  |
| C | 1.585498  | 3.348779  | 0.324678  |
| C | 0.412044  | 3.012817  | -0.544425 |
| O | 1.028300  | -3.515646 | -1.511251 |
| C | 3.189555  | -0.282407 | 2.267697  |
| C | -0.563814 | 3.867402  | -0.835187 |
| O | 1.974445  | 4.432708  | 0.690773  |
| H | 2.742407  | -0.008316 | -0.917532 |
| C | 0.219924  | -1.738061 | 0.770080  |
| O | -1.476113 | 0.650058  | -0.310298 |
| C | -2.749427 | 0.427783  | -0.668615 |
| O | -3.094930 | 0.231298  | -1.816993 |
| C | -3.687131 | 0.453159  | 0.509867  |
| C | -4.480831 | -0.858438 | 0.648642  |
| C | -3.549205 | -2.041254 | 0.920052  |
| C | -5.530695 | -0.715281 | 1.750929  |
| H | 2.353481  | -3.520540 | 0.824363  |
| H | 3.461699  | -3.832134 | -0.509336 |
| H | 4.497108  | -1.640468 | -0.279012 |
| H | 4.460712  | -2.374239 | 1.324841  |
| H | 2.410124  | -2.119899 | -1.889729 |
| H | 0.704506  | 0.926122  | 1.140376  |
| H | 1.355883  | 1.581830  | -1.759217 |
| H | -0.938795 | 0.977908  | -2.272645 |
| H | 0.705556  | -0.692760 | -2.491803 |
| H | -0.670067 | -1.471928 | -1.735717 |
| H | 0.679187  | -4.024554 | -0.770199 |
| H | 3.870232  | -0.747782 | 2.976554  |
| H | 2.642171  | 0.588583  | 2.614995  |
| H | -1.403349 | 3.577838  | -1.460762 |
| H | -0.543415 | 4.881312  | -0.445663 |
| H | -0.429433 | -0.940271 | 1.133550  |
| H | 0.838700  | -2.069744 | 1.607032  |
| H | -0.437713 | -2.564269 | 0.480272  |
| H | -3.125890 | 0.658891  | 1.426111  |
| H | -4.381977 | 1.284149  | 0.343101  |
| H | -4.996769 | -1.034970 | -0.302789 |
| H | -2.995871 | -1.895475 | 1.855913  |
| H | -4.118008 | -2.972902 | 1.007695  |
| H | -2.820164 | -2.176401 | 0.113419  |
| H | -6.222640 | 0.106760  | 1.538451  |
| H | -5.056470 | -0.517698 | 2.720175  |
| H | -6.118611 | -1.633952 | 1.849009  |

ωB97XD energy = -1154.88193270 a.u.

(1R,5S,6R,7R,8R,10R)-3, Conf. E

|   |          |           |           |
|---|----------|-----------|-----------|
| C | 4.308179 | -1.010271 | 0.433312  |
| C | 4.264824 | 0.442628  | 0.929878  |
| C | 2.852769 | 0.898414  | 1.206368  |
| C | 1.943683 | 0.686338  | 0.017857  |
| C | 1.868726 | -0.847280 | -0.337698 |
| C | 3.322805 | -1.261997 | -0.702663 |

|   |           |           |           |
|---|-----------|-----------|-----------|
| C | 0.528418  | 1.212503  | 0.108292  |
| C | -0.183982 | 1.071653  | -1.235358 |
| C | -0.401221 | -0.385506 | -1.588268 |
| C | 0.965085  | -1.086029 | -1.578296 |
| O | 0.415536  | 2.628834  | 0.399095  |
| C | -0.729987 | 3.100582  | -0.146177 |
| C | -1.289258 | 2.070566  | -1.078249 |
| O | 3.431256  | -2.639709 | -1.041283 |
| C | 2.467536  | 1.399451  | 2.381581  |
| C | -2.516597 | 2.128648  | -1.586567 |
| O | -1.156697 | 4.201785  | 0.110593  |
| H | 2.420525  | 1.187224  | -0.840152 |
| C | 1.362622  | -1.687554 | 0.847093  |
| O | -1.263706 | -1.000974 | -0.613965 |
| C | -2.501030 | -1.383722 | -0.964997 |
| O | -2.965282 | -1.221271 | -2.075782 |
| C | -3.203640 | -2.067751 | 0.179418  |
| C | -3.171323 | -1.291126 | 1.506944  |
| C | -3.881741 | 0.057230  | 1.376765  |
| C | -3.795868 | -2.136304 | 2.617607  |
| H | 4.083850  | -1.697366 | 1.256523  |
| H | 5.314890  | -1.253867 | 0.079667  |
| H | 4.693735  | 1.094079  | 0.155200  |
| H | 4.886115  | 0.552991  | 1.823130  |
| H | 3.625793  | -0.653620 | -1.570258 |
| H | -0.028570 | 0.692935  | 0.896080  |
| H | 0.500296  | 1.466795  | -2.001196 |
| H | -0.864819 | -0.489113 | -2.571186 |
| H | 1.490295  | -0.729565 | -2.474859 |
| H | 0.798677  | -2.160461 | -1.709092 |
| H | 3.020156  | -2.789065 | -1.899374 |
| H | 3.177164  | 1.503056  | 3.198990  |
| H | 1.451371  | 1.733733  | 2.567922  |
| H | -2.892823 | 1.355843  | -2.250381 |
| H | -3.176022 | 2.954806  | -1.335494 |
| H | 1.485418  | -2.749970 | 0.616503  |
| H | 0.303683  | -1.512970 | 1.044432  |
| H | 1.913195  | -1.475596 | 1.766203  |
| H | -4.235484 | -2.253218 | -0.132633 |
| H | -2.713829 | -3.040708 | 0.311971  |
| H | -2.120983 | -1.108055 | 1.763376  |
| H | -3.429553 | 0.684563  | 0.601003  |
| H | -4.938734 | -0.084901 | 1.120372  |
| H | -3.836631 | 0.612378  | 2.319589  |
| H | -3.277431 | -3.094532 | 2.732223  |
| H | -4.850993 | -2.346611 | 2.403989  |
| H | -3.748145 | -1.610939 | 3.577131  |

ωB97XD energy = -1154.88165091 a.u.

(1R,5S,6R,7R,8R,10R)-3, Conf. F

|   |          |           |           |
|---|----------|-----------|-----------|
| C | 4.411732 | -1.332315 | 0.417801  |
| C | 4.529327 | 0.151074  | 0.797886  |
| C | 3.182723 | 0.750052  | 1.122098  |
| C | 2.184582 | 0.543305  | 0.006231  |
| C | 1.948360 | -0.996272 | -0.234174 |
| C | 3.331762 | -1.580715 | -0.635806 |

|   |           |           |           |
|---|-----------|-----------|-----------|
| C | 0.829171  | 1.204698  | 0.137449  |
| C | 0.022051  | 1.037462  | -1.148331 |
| C | -0.331566 | -0.414101 | -1.400680 |
| C | 0.967485  | -1.227824 | -1.412840 |
| O | 0.856810  | 2.643143  | 0.324430  |
| C | -0.281561 | 3.173850  | -0.181257 |
| C | -0.987291 | 2.133650  | -0.996017 |
| O | 3.259422  | -2.960431 | -0.973067 |
| C | 2.918927  | 1.361947  | 2.278174  |
| C | -2.232438 | 2.267720  | -1.443633 |
| O | -0.595420 | 4.323902  | 0.017487  |
| H | 2.648581  | 0.937839  | -0.911637 |
| C | 1.423034  | -1.694051 | 1.033182  |
| O | -1.202546 | -0.893114 | -0.354972 |
| C | -2.473830 | -1.203130 | -0.652290 |
| O | -2.956761 | -1.076773 | -1.759946 |
| C | -3.209828 | -1.749615 | 0.544069  |
| C | -4.598734 | -1.120442 | 0.733762  |
| C | -5.359781 | -1.857676 | 1.836428  |
| C | -4.485868 | 0.372276  | 1.050760  |
| H | 4.187340  | -1.922678 | 1.315353  |
| H | 5.366915  | -1.697035 | 0.026661  |
| H | 4.956824  | 0.698730  | -0.053857 |
| H | 5.219749  | 0.271645  | 1.637545  |
| H | 3.632238  | -1.086724 | -1.568651 |
| H | 0.280257  | 0.797633  | 0.993236  |
| H | 0.685162  | 1.327950  | -1.977139 |
| H | -0.848656 | -0.529568 | -2.354922 |
| H | 1.477583  | -0.967386 | -2.349159 |
| H | 0.724764  | -2.291562 | -1.479742 |
| H | 3.193696  | -3.476120 | -0.160834 |
| H | 3.684975  | 1.455707  | 3.044214  |
| H | 1.950493  | 1.801343  | 2.497064  |
| H | -2.709981 | 1.489933  | -2.032328 |
| H | -2.802195 | 3.165471  | -1.220298 |
| H | 0.442911  | -1.317676 | 1.329625  |
| H | 2.095602  | -1.567916 | 1.884808  |
| H | 1.297667  | -2.766249 | 0.846790  |
| H | -3.311497 | -2.828586 | 0.372593  |
| H | -2.600394 | -1.613655 | 1.442382  |
| H | -5.147445 | -1.237458 | -0.208297 |
| H | -4.831594 | -1.781286 | 2.794908  |
| H | -6.357678 | -1.427449 | 1.972078  |
| H | -5.481043 | -2.920695 | 1.601373  |
| H | -3.933145 | 0.529760  | 1.985283  |
| H | -5.476984 | 0.823246  | 1.167673  |
| H | -3.965736 | 0.919605  | 0.256929  |

ωB97XD energy = -1154.88160085 a.u.

(1R,5S,6R,7R,8R,10R)-3, Conf. G

|   |          |           |           |
|---|----------|-----------|-----------|
| C | 4.382171 | -0.963462 | 0.522459  |
| C | 4.303037 | 0.512167  | 0.944445  |
| C | 2.878513 | 0.944759  | 1.191714  |
| C | 1.986483 | 0.656196  | 0.007002  |
| C | 1.937244 | -0.894210 | -0.268360 |
| C | 3.399388 | -1.308127 | -0.597950 |

|   |           |           |           |
|---|-----------|-----------|-----------|
| C | 0.564231  | 1.170820  | 0.052848  |
| C | -0.134771 | 0.942136  | -1.285571 |
| C | -0.326489 | -0.539497 | -1.550077 |
| C | 1.052802  | -1.209654 | -1.503466 |
| O | 0.437141  | 2.600175  | 0.260089  |
| C | -0.706998 | 3.028665  | -0.322449 |
| C | -1.246550 | 1.944282  | -1.203762 |
| O | 3.506019  | -2.678380 | -0.963257 |
| C | 2.469343  | 1.485081  | 2.341035  |
| C | -2.461660 | 1.980511  | -1.742942 |
| O | -1.147983 | 4.137226  | -0.128795 |
| H | 2.465815  | 1.116118  | -0.871938 |
| C | 1.428437  | -1.672671 | 0.958327  |
| O | -1.168193 | -1.122262 | -0.534602 |
| C | -2.440608 | -1.433827 | -0.821911 |
| O | -2.950622 | -1.251620 | -1.909889 |
| C | -3.150403 | -2.021498 | 0.368648  |
| C | -4.009532 | -0.982607 | 1.122220  |
| C | -4.803296 | -1.690878 | 2.221453  |
| C | -3.162298 | 0.150267  | 1.705599  |
| H | 4.182721  | -1.604253 | 1.390651  |
| H | 5.394333  | -1.200181 | 0.179205  |
| H | 4.718340  | 1.130535  | 0.136402  |
| H | 4.918984  | 0.684274  | 1.831668  |
| H | 3.693260  | -0.761340 | -1.502885 |
| H | 0.003883  | 0.694471  | 0.864552  |
| H | 0.553981  | 1.294996  | -2.067628 |
| H | -0.792951 | -0.709316 | -2.522372 |
| H | 1.579744  | -0.880716 | -2.408159 |
| H | 0.927044  | -2.291693 | -1.594011 |
| H | 3.449762  | -3.218646 | -0.166532 |
| H | 3.167715  | 1.643789  | 3.159349  |
| H | 1.442789  | 1.799304  | 2.503962  |
| H | -2.829058 | 1.172604  | -2.367840 |
| H | -3.119220 | 2.823774  | -1.550405 |
| H | 0.395386  | -1.420677 | 1.201072  |
| H | 2.032903  | -1.484564 | 1.848271  |
| H | 1.442697  | -2.748466 | 0.751767  |
| H | -3.796610 | -2.820871 | -0.004890 |
| H | -2.415952 | -2.453633 | 1.055510  |
| H | -4.719480 | -0.554053 | 0.403216  |
| H | -5.448736 | -0.983593 | 2.752552  |
| H | -5.438257 | -2.483591 | 1.811647  |
| H | -4.127468 | -2.143753 | 2.957440  |
| H | -3.791606 | 0.848123  | 2.267819  |
| H | -2.652559 | 0.723013  | 0.925202  |
| H | -2.402621 | -0.243480 | 2.392446  |

ωB97XD energy = -1154.88157830 a.u.

(1R,5S,6R,7R,8R,10R)-3, Conf. H

|   |          |           |           |
|---|----------|-----------|-----------|
| C | 4.267375 | -1.027402 | 0.371578  |
| C | 4.232491 | 0.411531  | 0.909476  |
| C | 2.820726 | 0.852637  | 1.211658  |
| C | 1.906295 | 0.682408  | 0.020328  |
| C | 1.827752 | -0.837823 | -0.390593 |
| C | 3.272469 | -1.239943 | -0.770301 |

|   |           |           |           |
|---|-----------|-----------|-----------|
| C | 0.490945  | 1.204878  | 0.131421  |
| C | -0.218580 | 1.117277  | -1.218838 |
| C | -0.437913 | -0.327069 | -1.625184 |
| C | 0.924115  | -1.033212 | -1.638479 |
| O | 0.378343  | 2.607252  | 0.480824  |
| C | -0.762421 | 3.104568  | -0.050498 |
| C | -1.318094 | 2.119173  | -1.031920 |
| O | 3.260639  | -2.597978 | -1.196201 |
| C | 2.442557  | 1.306404  | 2.408148  |
| C | -2.534162 | 2.223167  | -1.560175 |
| O | -1.187904 | 4.194534  | 0.252951  |
| H | 2.380637  | 1.212733  | -0.820755 |
| C | 1.318533  | -1.714067 | 0.767612  |
| O | -1.310332 | -0.973349 | -0.676901 |
| C | -2.574915 | -1.248440 | -1.024695 |
| O | -3.039018 | -1.007170 | -2.121806 |
| C | -3.329466 | -1.941484 | 0.081608  |
| C | -2.984734 | -1.518747 | 1.516727  |
| C | -3.256614 | -0.030381 | 1.744937  |
| C | -3.778595 | -2.376802 | 2.503909  |
| H | 4.044292  | -1.737258 | 1.175549  |
| H | 5.276767  | -1.258509 | 0.010457  |
| H | 4.652738  | 1.085287  | 0.149395  |
| H | 4.862467  | 0.496547  | 1.799397  |
| H | 3.571908  | -0.602048 | -1.618447 |
| H | -0.067550 | 0.653818  | 0.896153  |
| H | 0.469835  | 1.536351  | -1.968183 |
| H | -0.898095 | -0.393629 | -2.612700 |
| H | 1.452526  | -0.649379 | -2.520508 |
| H | 0.769070  | -2.101877 | -1.807669 |
| H | 4.164295  | -2.860230 | -1.402966 |
| H | 3.158131  | 1.381222  | 3.223552  |
| H | 1.426566  | 1.628541  | 2.615473  |
| H | -2.911988 | 1.488296  | -2.264252 |
| H | -3.181528 | 3.050913  | -1.283974 |
| H | 0.265177  | -1.524751 | 0.979189  |
| H | 1.878473  | -1.544853 | 1.690062  |
| H | 1.415734  | -2.769163 | 0.497296  |
| H | -4.395037 | -1.790948 | -0.118893 |
| H | -3.130087 | -3.013719 | -0.047186 |
| H | -1.917287 | -1.706217 | 1.680615  |
| H | -4.314921 | 0.202036  | 1.572659  |
| H | -3.013727 | 0.255305  | 2.773997  |
| H | -2.663138 | 0.599790  | 1.074755  |
| H | -3.573203 | -3.443635 | 2.362752  |
| H | -4.856870 | -2.221911 | 2.375306  |
| H | -3.525595 | -2.119064 | 3.537665  |

ωB97XD energy = -1154.88147706 a.u.

(1R,5S,6R,7R,8R,10R)-3, Conf. I

|   |          |           |           |
|---|----------|-----------|-----------|
| C | 4.200622 | -1.653984 | 0.338087  |
| C | 4.496753 | -0.193664 | 0.711822  |
| C | 3.236915 | 0.552922  | 1.074803  |
| C | 2.191770 | 0.463077  | -0.012581 |
| C | 1.773533 | -1.039440 | -0.243947 |
| C | 3.069257 | -1.778332 | -0.683326 |

|   |           |           |           |
|---|-----------|-----------|-----------|
| C | 0.927197  | 1.276364  | 0.154666  |
| C | 0.070471  | 1.202434  | -1.105937 |
| C | -0.458030 | -0.195291 | -1.335903 |
| C | 0.737088  | -1.157851 | -1.391388 |
| O | 1.123444  | 2.702949  | 0.334896  |
| C | 0.032931  | 3.356098  | -0.131965 |
| C | -0.808501 | 2.399947  | -0.920401 |
| O | 2.830430  | -3.140068 | -1.015390 |
| C | 3.074679  | 1.183582  | 2.239349  |
| C | -2.052598 | 2.651918  | -1.314201 |
| O | -0.147117 | 4.533097  | 0.074746  |
| H | 2.672372  | 0.802133  | -0.943930 |
| C | 1.209322  | -1.673814 | 1.040447  |
| O | -1.349105 | -0.508488 | -0.246466 |
| C | -2.352631 | -1.368606 | -0.469593 |
| O | -2.578028 | -1.865833 | -1.555418 |
| C | -3.162263 | -1.628255 | 0.773622  |
| C | -4.613923 | -1.130322 | 0.638984  |
| C | -5.410659 | -1.519641 | 1.884460  |
| C | -4.661673 | 0.380663  | 0.402113  |
| H | 3.939738  | -2.218545 | 1.242497  |
| H | 5.096870  | -2.121740 | -0.081513 |
| H | 4.958164  | 0.302627  | -0.153540 |
| H | 5.220928  | -0.153361 | 1.530618  |
| H | 3.397658  | -1.321410 | -1.625534 |
| H | 0.358304  | 0.937280  | 1.026634  |
| H | 0.736464  | 1.418360  | -1.954735 |
| H | -1.021162 | -0.258960 | -2.269706 |
| H | 1.240630  | -0.958662 | -2.346083 |
| H | 0.370502  | -2.186099 | -1.447241 |
| H | 2.724195  | -3.645551 | -0.201032 |
| H | 3.866357  | 1.187004  | 2.984628  |
| H | 2.166377  | 1.724552  | 2.487093  |
| H | -2.621275 | 1.924546  | -1.886018 |
| H | -2.530876 | 3.596942  | -1.073086 |
| H | 0.283500  | -1.192924 | 1.359242  |
| H | 1.914051  | -1.617755 | 1.873261  |
| H | 0.968010  | -2.727652 | 0.863208  |
| H | -3.160229 | -2.711767 | 0.934477  |
| H | -2.681095 | -1.151609 | 1.632972  |
| H | -5.058813 | -1.632345 | -0.228935 |
| H | -5.395355 | -2.602876 | 2.046788  |
| H | -4.997960 | -1.037891 | 2.779287  |
| H | -6.456242 | -1.208623 | 1.789387  |
| H | -5.696915 | 0.731311  | 0.336534  |
| H | -4.160539 | 0.661604  | -0.530330 |
| H | -4.172201 | 0.921336  | 1.221455  |

ωB97XD energy = -1154.88138391 a.u.

(1R,5S,6R,7R,8R,10R)-3, Conf. J

|   |          |           |           |
|---|----------|-----------|-----------|
| C | 4.076199 | -1.898486 | 0.268177  |
| C | 4.487460 | -0.472669 | 0.664822  |
| C | 3.293020 | 0.361498  | 1.057840  |
| C | 2.230613 | 0.372693  | -0.016794 |
| C | 1.693541 | -1.088119 | -0.266111 |
| C | 2.922633 | -1.917039 | -0.736008 |

|   |           |           |           |
|---|-----------|-----------|-----------|
| C | 1.034922  | 1.278345  | 0.182198  |
| C | 0.152498  | 1.289229  | -1.064307 |
| C | -0.483009 | -0.060505 | -1.309446 |
| C | 0.637127  | -1.106476 | -1.400600 |
| O | 1.343622  | 2.682789  | 0.377847  |
| C | 0.297902  | 3.424489  | -0.057982 |
| C | -0.628925 | 2.546959  | -0.842464 |
| O | 2.575551  | -3.250323 | -1.087176 |
| C | 3.194032  | 0.985471  | 2.232999  |
| C | -1.860225 | 2.899147  | -1.198501 |
| O | 0.211636  | 4.608106  | 0.169841  |
| H | 2.723577  | 0.689942  | -0.949303 |
| C | 1.098274  | -1.699448 | 1.015566  |
| O | -1.388687 | -0.314357 | -0.216534 |
| C | -2.376214 | -1.200421 | -0.407015 |
| O | -2.566821 | -1.768906 | -1.463918 |
| C | -3.203862 | -1.398579 | 0.836020  |
| C | -4.703050 | -1.156592 | 0.591701  |
| C | -5.494168 | -1.497047 | 1.855173  |
| C | -4.964879 | 0.283952  | 0.147161  |
| H | 3.788348  | -2.460124 | 1.166173  |
| H | 4.928217  | -2.423077 | -0.175654 |
| H | 4.975162  | 0.003949  | -0.197119 |
| H | 5.222254  | -0.502891 | 1.474437  |
| H | 3.272618  | -1.470316 | -1.675461 |
| H | 0.457413  | 0.972355  | 1.060858  |
| H | 0.819551  | 1.469523  | -1.920770 |
| H | -1.059814 | -0.065172 | -2.237709 |
| H | 1.140576  | -0.922775 | -2.358490 |
| H | 0.198041  | -2.104301 | -1.473238 |
| H | 2.441540  | -3.760935 | -0.280049 |
| H | 3.992026  | 0.918436  | 2.968574  |
| H | 2.333296  | 1.591559  | 2.499248  |
| H | -2.501029 | 2.227507  | -1.762084 |
| H | -2.256234 | 3.874498  | -0.930355 |
| H | 0.224496  | -1.146806 | 1.364056  |
| H | 1.819919  | -1.721792 | 1.835126  |
| H | 0.762533  | -2.724319 | 0.823046  |
| H | -3.044767 | -2.435113 | 1.156162  |
| H | -2.836906 | -0.739951 | 1.628748  |
| H | -5.022898 | -1.831614 | -0.211219 |
| H | -5.332747 | -2.536848 | 2.159402  |
| H | -5.196131 | -0.850198 | 2.689545  |
| H | -6.567577 | -1.356649 | 1.691245  |
| H | -6.034897 | 0.453458  | -0.011912 |
| H | -4.453480 | 0.517407  | -0.793452 |
| H | -4.618834 | 0.997370  | 0.905144  |

ωB97XD energy = -1154.88130041 a.u.

(1R,5S,6R,7R,8R,10R)-3, Conf. K

|   |          |           |           |
|---|----------|-----------|-----------|
| C | 4.275195 | -1.125746 | 0.337375  |
| C | 4.359504 | 0.382679  | 0.615656  |
| C | 3.006371 | 0.961423  | 0.947922  |
| C | 1.981172 | 0.655358  | -0.118957 |
| C | 1.778528 | -0.903404 | -0.239921 |
| C | 3.162357 | -1.480817 | -0.650333 |



|   |           |           |           |
|---|-----------|-----------|-----------|
| C | 0.616623  | 1.295617  | 0.011308  |
| C | -0.236544 | 1.003360  | -1.220898 |
| C | -0.561179 | -0.468751 | -1.333009 |
| C | 0.761208  | -1.246805 | -1.359359 |
| O | 0.615069  | 2.745244  | 0.076761  |
| C | -0.559041 | 3.203804  | -0.417874 |
| C | -1.271480 | 2.079084  | -1.105510 |
| O | 3.115832  | -2.883438 | -0.878907 |
| C | 2.756222  | 1.634321  | 2.072640  |
| C | -2.548201 | 2.124776  | -1.472670 |
| O | -0.896304 | 4.358532  | -0.302703 |
| H | 2.405756  | 0.992911  | -1.077373 |
| C | 1.319878  | -1.522405 | 1.093681  |
| O | -1.360800 | -0.827027 | -0.189918 |
| C | -2.191732 | -1.874300 | -0.290077 |
| O | -2.357662 | -2.494369 | -1.322128 |
| C | -2.870696 | -2.178757 | 1.020832  |
| C | -3.900884 | -1.122892 | 1.485113  |
| C | -3.262656 | 0.177681  | 1.977976  |
| C | -4.948574 | -0.850831 | 0.404169  |
| H | 4.108763  | -1.660840 | 1.280845  |
| H | 5.225122  | -1.486919 | -0.069332 |
| H | 4.740753  | 0.886223  | -0.283860 |
| H | 5.073377  | 0.577548  | 1.421040  |
| H | 3.412855  | -1.051488 | -1.628713 |
| H | 0.110396  | 0.950650  | 0.918731  |
| H | 0.381530  | 1.243649  | -2.099181 |
| H | -1.133101 | -0.683870 | -2.238590 |
| H | 1.220859  | -1.037976 | -2.333722 |
| H | 0.551029  | -2.319287 | -1.342090 |
| H | 3.088046  | -3.335826 | -0.027557 |
| H | 3.539871  | 1.799520  | 2.808278  |
| H | 1.780822  | 2.057370  | 2.293562  |
| H | -3.027159 | 1.281359  | -1.961515 |
| H | -3.145002 | 3.013403  | -1.287999 |
| H | 0.377041  | -1.096746 | 1.440693  |
| H | 2.053500  | -1.380655 | 1.890621  |
| H | 1.151089  | -2.597383 | 0.967167  |
| H | -3.369691 | -3.142276 | 0.894274  |
| H | -2.093886 | -2.291416 | 1.785726  |
| H | -4.409466 | -1.586095 | 2.339599  |
| H | -4.024201 | 0.824959  | 2.426193  |
| H | -2.495397 | -0.014583 | 2.736350  |
| H | -2.794927 | 0.729437  | 1.157247  |
| H | -4.498681 | -0.360029 | -0.467750 |
| H | -5.732203 | -0.187569 | 0.784726  |
| H | -5.422603 | -1.775981 | 0.059407  |

ωB97XD energy = -1154.88082913 a.u.

(1R,5S,6R,7R,8R,10R)-3, Conf. L

|   |          |           |           |
|---|----------|-----------|-----------|
| C | 3.446109 | -2.570195 | -0.118092 |
| C | 4.205339 | -1.298263 | 0.289542  |
| C | 3.270760 | -0.245067 | 0.832238  |
| C | 2.144415 | 0.064672  | -0.126588 |
| C | 1.272740 | -1.224449 | -0.377649 |
| C | 2.238544 | -2.267276 | -1.006068 |

|   |           |           |           |
|---|-----------|-----------|-----------|
| C | 1.208228  | 1.198332  | 0.228592  |
| C | 0.243836  | 1.482208  | -0.920363 |
| C | -0.700615 | 0.322383  | -1.159727 |
| C | 0.139742  | -0.938741 | -1.396766 |
| O | 1.847202  | 2.483293  | 0.445955  |
| C | 0.967447  | 3.466544  | 0.140834  |
| C | -0.205403 | 2.868504  | -0.574379 |
| O | 1.571673  | -3.464497 | -1.385987 |
| C | 3.425035  | 0.317154  | 2.032398  |
| C | -1.345506 | 3.516246  | -0.795979 |
| O | 1.180158  | 4.624191  | 0.414716  |
| H | 2.610500  | 0.321478  | -1.091029 |
| C | 0.675353  | -1.768928 | 0.932280  |
| O | -1.551632 | 0.146579  | -0.010205 |
| C | -2.870586 | 0.370850  | -0.130535 |
| O | -3.396257 | 0.748931  | -1.159087 |
| C | -3.603068 | 0.067559  | 1.149749  |
| C | -4.204565 | -1.359223 | 1.173129  |
| C | -5.285887 | -1.551578 | 0.108024  |
| C | -3.125890 | -2.439897 | 1.067363  |
| H | 3.112208  | -3.101728 | 0.782219  |
| H | 4.113220  | -3.247258 | -0.660926 |
| H | 4.709158  | -0.890442 | -0.597845 |
| H | 4.982024  | -1.539512 | 1.020729  |
| H | 2.599269  | -1.843652 | -1.952490 |
| H | 0.658709  | 0.973581  | 1.149243  |
| H | 0.854308  | 1.560370  | -1.832818 |
| H | -1.335020 | 0.509571  | -2.027887 |
| H | 0.585264  | -0.819831 | -2.392571 |
| H | -0.523131 | -1.806139 | -1.454748 |
| H | 1.414759  | -3.997501 | -0.597877 |
| H | 4.252368  | 0.032423  | 2.678054  |
| H | 2.751344  | 1.081778  | 2.407217  |
| H | -2.174764 | 3.043520  | -1.314013 |
| H | -1.471915 | 4.539653  | -0.453750 |
| H | 1.439192  | -1.956470 | 1.690411  |
| H | 0.142320  | -2.706755 | 0.741988  |
| H | -0.054501 | -1.080783 | 1.360669  |
| H | -2.914213 | 0.185789  | 1.990375  |
| H | -4.407331 | 0.801984  | 1.246297  |
| H | -4.679916 | -1.452618 | 2.157203  |
| H | -5.766426 | -2.528625 | 0.226305  |
| H | -6.061173 | -0.781531 | 0.180220  |
| H | -4.864583 | -1.504514 | -0.901910 |
| H | -2.629974 | -2.415506 | 0.090080  |
| H | -3.570087 | -3.433511 | 1.188512  |
| H | -2.356929 | -2.316766 | 1.837196  |

ωB97XD energy = -1154.88054135 a.u.

(1R,5S,6R,7R,8R,10R)-3, Conf. M

|   |          |           |           |
|---|----------|-----------|-----------|
| C | 4.191131 | -1.582016 | 0.250493  |
| C | 4.480315 | -0.102238 | 0.544573  |
| C | 3.227505 | 0.644001  | 0.932441  |
| C | 2.132919 | 0.488064  | -0.097626 |
| C | 1.727253 | -1.029273 | -0.233344 |
| C | 3.010956 | -1.769717 | -0.704371 |

|   |           |           |           |
|---|-----------|-----------|-----------|
| C | 0.866952  | 1.294560  | 0.091724  |
| C | -0.057869 | 1.139560  | -1.112804 |
| C | -0.576191 | -0.275939 | -1.235334 |
| C | 0.634194  | -1.218360 | -1.317197 |
| O | 1.054991  | 2.730892  | 0.180408  |
| C | -0.065487 | 3.347111  | -0.264736 |
| C | -0.936840 | 2.340969  | -0.951828 |
| O | 2.778229  | -3.148645 | -0.960976 |
| C | 3.112178  | 1.329348  | 2.071408  |
| C | -2.197065 | 2.569713  | -1.306149 |
| O | -0.247012 | 4.532736  | -0.116488 |
| H | 2.562909  | 0.785459  | -1.067262 |
| C | 1.239288  | -1.609642 | 1.107139  |
| O | -1.388327 | -0.543333 | -0.075268 |
| C | -2.302098 | -1.523318 | -0.148029 |
| O | -2.524117 | -2.149798 | -1.165530 |
| C | -3.002852 | -1.730329 | 1.170257  |
| C | -4.349644 | -0.976609 | 1.283581  |
| C | -4.174637 | 0.537511  | 1.153745  |
| C | -5.393055 | -1.499830 | 0.294947  |
| H | 3.988512  | -2.108971 | 1.191492  |
| H | 5.073023  | -2.053905 | -0.194208 |
| H | 4.893468  | 0.361284  | -0.362384 |
| H | 5.240339  | -0.014988 | 1.326411  |
| H | 3.282936  | -1.352076 | -1.682102 |
| H | 0.351317  | 1.000546  | 1.011801  |
| H | 0.556114  | 1.311271  | -2.009570 |
| H | -1.196106 | -0.398036 | -2.126744 |
| H | 1.081783  | -1.052720 | -2.305465 |
| H | 0.287391  | -2.254494 | -1.307036 |
| H | 2.711366  | -3.614222 | -0.119043 |
| H | 3.937800  | 1.377164  | 2.777422  |
| H | 2.209508  | 1.871286  | 2.337056  |
| H | -2.788226 | 1.809734  | -1.808597 |
| H | -2.667131 | 3.527060  | -1.100291 |
| H | 0.348353  | -1.097052 | 1.472446  |
| H | 1.998076  | -1.543678 | 1.890328  |
| H | 0.965212  | -2.662983 | 0.981563  |
| H | -3.181237 | -2.804171 | 1.275085  |
| H | -2.337827 | -1.405896 | 1.975210  |
| H | -4.710188 | -1.189843 | 2.297305  |
| H | -5.118864 | 1.051161  | 1.362923  |
| H | -3.419065 | 0.919978  | 1.848196  |
| H | -3.865690 | 0.815299  | 0.139885  |
| H | -5.101346 | -1.298693 | -0.741599 |
| H | -6.359105 | -1.013893 | 0.469479  |
| H | -5.535168 | -2.580829 | 0.397182  |

$\omega$ B97XD energy = -1154.88024381 a.u.

(1R,5S,6R,7R,8R,10R)-3, Conf. N

|   |          |           |           |
|---|----------|-----------|-----------|
| C | 3.721549 | -1.985263 | 0.180114  |
| C | 4.130272 | -0.637586 | 0.793591  |
| C | 2.925166 | 0.189163  | 1.169685  |
| C | 1.977564 | 0.375192  | 0.007245  |
| C | 1.428855 | -1.021298 | -0.475643 |
| C | 2.676178 | -1.832378 | -0.925658 |

|   |           |           |           |
|---|-----------|-----------|-----------|
| C | 0.795044  | 1.298051  | 0.203480  |
| C | 0.037872  | 1.493090  | -1.107155 |
| C | -0.600848 | 0.211491  | -1.590461 |
| C | 0.490868  | -0.860732 | -1.700076 |
| O | 1.123413  | 2.657173  | 0.594489  |
| C | 0.146029  | 3.486167  | 0.155911  |
| C | -0.734226 | 2.737858  | -0.798262 |
| O | 2.330080  | -3.096986 | -1.476054 |
| C | 2.723015  | 0.663791  | 2.400201  |
| C | -1.930721 | 3.159663  | -1.195395 |
| O | 0.076979  | 4.639984  | 0.508024  |
| H | 2.570278  | 0.784547  | -0.826237 |
| C | 0.690099  | -1.758215 | 0.656075  |
| O | -1.628911 | -0.146762 | -0.645611 |
| C | -2.697625 | -0.819978 | -1.091720 |
| O | -2.833424 | -1.153562 | -2.252777 |
| C | -3.716612 | -1.084981 | -0.011395 |
| C | -3.168853 | -1.549317 | 1.354354  |
| C | -2.697135 | -0.382143 | 2.225784  |
| C | -4.246117 | -2.353912 | 2.086628  |
| H | 3.327444  | -2.642280 | 0.966048  |
| H | 4.599278  | -2.484897 | -0.241879 |
| H | 4.718415  | -0.078052 | 0.052842  |
| H | 4.774497  | -0.798839 | 1.662700  |
| H | 3.131190  | -1.286813 | -1.762338 |
| H | 0.126365  | 0.912743  | 0.980203  |
| H | 0.788112  | 1.758186  | -1.866864 |
| H | -1.070719 | 0.350601  | -2.566535 |
| H | 1.094183  | -0.587034 | -2.575264 |
| H | 0.029755  | -1.823452 | -1.934152 |
| H | 2.101112  | -3.697762 | -0.757246 |
| H | 3.442002  | 0.473926  | 3.193505  |
| H | 1.855720  | 1.263801  | 2.659027  |
| H | -2.541388 | 2.570572  | -1.873870 |
| H | -2.329929 | 4.105999  | -0.841685 |
| H | -0.185850 | -1.204233 | 0.995990  |
| H | 1.327894  | -1.927866 | 1.526594  |
| H | 0.326947  | -2.728316 | 0.299216  |
| H | -4.293665 | -0.159182 | 0.119135  |
| H | -4.400302 | -1.830612 | -0.424705 |
| H | -2.316783 | -2.216402 | 1.171047  |
| H | -3.545745 | 0.257412  | 2.499719  |
| H | -1.963205 | 0.241693  | 1.710613  |
| H | -2.243108 | -0.750753 | 3.151901  |
| H | -5.145446 | -1.746735 | 2.247033  |
| H | -4.538413 | -3.244109 | 1.519455  |
| H | -3.885986 | -2.682917 | 3.067369  |

$\omega$ B97XD energy = -1154.87965734 a.u.

(1R,5S,6R,7R,8S,10R)-3, Conf. A

|   |          |           |           |
|---|----------|-----------|-----------|
| C | 4.304548 | -1.798485 | -0.441506 |
| C | 4.675792 | -0.337951 | -0.737121 |
| C | 3.748792 | 0.621058  | -0.031650 |
| C | 2.297275 | 0.345603  | -0.351006 |
| C | 1.899331 | -1.102673 | 0.121064  |

|   |           |           |           |
|---|-----------|-----------|-----------|
| C | 2.818083  | -2.074962 | -0.670044 |
| C | 1.266764  | 1.311036  | 0.190223  |
| C | -0.132156 | 0.983461  | -0.333243 |
| C | -0.576191 | -0.352080 | 0.218896  |
| C | 0.428572  | -1.412383 | -0.247027 |
| O | 1.452297  | 2.693610  | -0.202511 |
| C | 0.249079  | 3.314366  | -0.186017 |
| C | -0.829830 | 2.281604  | -0.057932 |
| O | 2.505754  | -3.439310 | -0.422741 |
| C | 4.183121  | 1.571599  | 0.797992  |
| C | -2.091057 | 2.576137  | 0.243995  |
| O | 0.144294  | 4.513670  | -0.287273 |
| H | 2.203066  | 0.354147  | -1.448210 |
| C | 2.094624  | -1.287994 | 1.636223  |
| O | -1.876877 | -0.642288 | -0.327602 |
| C | -2.660615 | -1.501577 | 0.346223  |
| O | -2.320901 | -2.036403 | 1.382568  |
| C | -3.989583 | -1.688611 | -0.336921 |
| C | -4.820418 | -0.392479 | -0.409362 |
| C | -6.121137 | -0.650269 | -1.170734 |
| C | -5.104717 | 0.167051  | 0.986100  |
| H | 4.564435  | -2.039220 | 0.597675  |
| H | 4.886244  | -2.469468 | -1.081483 |
| H | 4.595451  | -0.167590 | -1.819913 |
| H | 5.715648  | -0.148263 | -0.456631 |
| H | 2.594842  | -1.930964 | -1.735016 |
| H | 1.272033  | 1.303153  | 1.286982  |
| H | -0.052248 | 0.882374  | -1.426874 |
| H | -0.665932 | -0.320439 | 1.308166  |
| H | 0.336094  | -1.485751 | -1.338548 |
| H | 0.154503  | -2.385068 | 0.167811  |
| H | 2.882486  | -3.697078 | 0.426778  |
| H | 5.246013  | 1.696587  | 0.990486  |
| H | 3.511977  | 2.263509  | 1.297679  |
| H | -2.849283 | 1.804637  | 0.324667  |
| H | -2.387082 | 3.606922  | 0.417750  |
| H | 1.402047  | -0.678485 | 2.222779  |
| H | 3.104571  | -1.026878 | 1.961054  |
| H | 1.900169  | -2.329478 | 1.912817  |
| H | -3.800409 | -2.058297 | -1.350943 |
| H | -4.536192 | -2.459484 | 0.213615  |
| H | -4.235675 | 0.346310  | -0.971414 |
| H | -6.742069 | -1.386502 | -0.646153 |
| H | -6.703519 | 0.272317  | -1.265508 |
| H | -5.926615 | -1.030473 | -2.179287 |
| H | -4.185010 | 0.362069  | 1.549514  |
| H | -5.706095 | -0.537501 | 1.573126  |
| H | -5.657654 | 1.109985  | 0.920632  |

$\omega$ B97XD energy = -1154.88260409 a.u.

(1R,5S,6R,7R,8S,10R)-**3**, Conf. B

|   |          |           |           |
|---|----------|-----------|-----------|
| C | 3.302854 | -2.823794 | -0.453339 |
| C | 4.098302 | -1.620097 | -0.979280 |
| C | 3.663942 | -0.336487 | -0.315474 |
| C | 2.174062 | -0.107749 | -0.432926 |
| C | 1.385325 | -1.278614 | 0.267263  |

|   |           |           |           |
|---|-----------|-----------|-----------|
| C | 1.794648  | -2.576582 | -0.482772 |
| C | 1.625733  | 1.198509  | 0.096419  |
| C | 0.136176  | 1.346437  | -0.213428 |
| C | -0.647217 | 0.297246  | 0.539920  |
| C | -0.140241 | -1.081173 | 0.102656  |
| O | 2.201291  | 2.395481  | -0.485579 |
| C | 1.296281  | 3.398867  | -0.390994 |
| C | -0.030443 | 2.820483  | 0.000222  |
| O | 1.077924  | -3.716332 | -0.027617 |
| C | 4.511886  | 0.473383  | 0.321409  |
| C | -1.047189 | 3.551020  | 0.449045  |
| O | 1.585835  | 4.548428  | -0.623353 |
| H | 1.923472  | -0.155532 | -1.504172 |
| C | 1.725542  | -1.383936 | 1.764733  |
| O | -2.030234 | 0.436410  | 0.166360  |
| C | -2.965596 | 0.003465  | 1.027990  |
| O | -2.703312 | -0.445896 | 2.125476  |
| C | -4.349374 | 0.155463  | 0.453875  |
| C | -4.549384 | -0.614538 | -0.865641 |
| C | -4.276677 | -2.109490 | -0.684135 |
| C | -5.962233 | -0.371096 | -1.396985 |
| H | 3.615146  | -3.049176 | 0.574783  |
| H | 3.522013  | -3.711063 | -1.055757 |
| H | 3.924054  | -1.528462 | -2.060534 |
| H | 5.170171  | -1.784177 | -0.837167 |
| H | 1.480348  | -2.455367 | -1.527217 |
| H | 1.796645  | 1.275271  | 1.176997  |
| H | 0.007793  | 1.153066  | -1.289964 |
| H | -0.564553 | 0.442669  | 1.620069  |
| H | -0.408615 | -1.204675 | -0.954653 |
| H | -0.664098 | -1.859818 | 0.663102  |
| H | 1.462887  | -4.015766 | 0.804326  |
| H | 5.570829  | 0.233845  | 0.381034  |
| H | 4.194247  | 1.401652  | 0.786252  |
| H | -1.991803 | 3.095969  | 0.729322  |
| H | -0.947728 | 4.628227  | 0.548692  |
| H | 1.339809  | -0.535577 | 2.336164  |
| H | 2.801987  | -1.431139 | 1.945238  |
| H | 1.263300  | -2.278677 | 2.194772  |
| H | -5.058554 | -0.193575 | 1.209634  |
| H | -4.528153 | 1.223882  | 0.284840  |
| H | -3.833045 | -0.218984 | -1.595544 |
| H | -4.947923 | -2.540608 | 0.068532  |
| H | -4.434574 | -2.646871 | -1.625102 |
| H | -3.246142 | -2.303126 | -0.365042 |
| H | -6.150797 | 0.696147  | -1.556874 |
| H | -6.715492 | -0.745705 | -0.693126 |
| H | -6.111643 | -0.885055 | -2.352228 |

$\omega$ B97XD energy = -1154.88237978 a.u.

(1R,5S,6R,7R,8S,10R)-**3**, Conf. C

|   |          |           |           |
|---|----------|-----------|-----------|
| C | 3.113750 | -3.031885 | -0.337709 |
| C | 4.042596 | -1.903855 | -0.810540 |
| C | 3.676464 | -0.584878 | -0.175083 |
| C | 2.222889 | -0.230850 | -0.391652 |
| C | 1.292147 | -1.327238 | 0.252105  |

|   |           |           |           |
|---|-----------|-----------|-----------|
| C | 1.638305  | -2.656678 | -0.473876 |
| C | 1.753596  | 1.118879  | 0.102598  |
| C | 0.306528  | 1.394103  | -0.306734 |
| C | -0.612089 | 0.418582  | 0.390079  |
| C | -0.196825 | -1.001386 | -0.010564 |
| O | 2.468229  | 2.260268  | -0.434759 |
| C | 1.649228  | 3.338663  | -0.397100 |
| C | 0.253685  | 2.877568  | -0.099794 |
| O | 0.794988  | -3.729452 | -0.077214 |
| C | 4.543810  | 0.151260  | 0.522414  |
| C | -0.724774 | 3.693447  | 0.281915  |
| O | 2.052787  | 4.458547  | -0.602794 |
| H | 2.040089  | -0.261965 | -1.476980 |
| C | 1.523087  | -1.459208 | 1.768061  |
| O | -1.953180 | 0.663285  | -0.076606 |
| C | -2.969560 | 0.342730  | 0.740800  |
| O | -2.810630 | -0.075286 | 1.870636  |
| C | -4.310059 | 0.536982  | 0.084395  |
| C | -5.027779 | -0.810766 | -0.135528 |
| C | -6.414911 | -0.568843 | -0.730585 |
| C | -4.202186 | -1.744652 | -1.023530 |
| H | 3.332271  | -3.272426 | 0.710999  |
| H | 3.298229  | -3.940028 | -0.920362 |
| H | 3.945541  | -1.803522 | -1.900721 |
| H | 5.085698  | -2.157313 | -0.600687 |
| H | 1.411639  | -2.509125 | -1.537529 |
| H | 1.859125  | 1.183672  | 1.192276  |
| H | 0.234057  | 1.209475  | -1.390057 |
| H | -0.593348 | 0.562678  | 1.473273  |
| H | -0.407783 | -1.111356 | -1.082127 |
| H | -0.819797 | -1.726966 | 0.518825  |
| H | 1.092173  | -4.063246 | 0.777260  |
| H | 5.571621  | -0.178315 | 0.654111  |
| H | 4.274073  | 1.102769  | 0.970479  |
| H | -1.722317 | 3.321480  | 0.493187  |
| H | -0.541305 | 4.758511  | 0.391902  |
| H | 1.157288  | -0.587609 | 2.317086  |
| H | 2.579123  | -1.580928 | 2.019942  |
| H | 0.973055  | -2.321636 | 2.158858  |
| H | -4.912298 | 1.168327  | 0.745965  |
| H | -4.182530 | 1.054526  | -0.870951 |
| H | -5.148819 | -1.283958 | 0.846625  |
| H | -6.339945 | -0.088501 | -1.713812 |
| H | -6.949216 | -1.515772 | -0.860786 |
| H | -7.022278 | 0.074851  | -0.084915 |
| H | -3.232709 | -1.986658 | -0.574416 |
| H | -4.015675 | -1.288231 | -2.003297 |
| H | -4.730918 | -2.689481 | -1.186299 |

$\omega$ B97XD energy = -1154.88218026 a.u.

(1R,5S,6R,7R,8S,10R)-**3**, Conf. D

|   |          |           |           |
|---|----------|-----------|-----------|
| C | 4.078903 | -2.279954 | -0.304245 |
| C | 4.681546 | -0.896533 | -0.590891 |
| C | 3.878338 | 0.203383  | 0.059156  |
| C | 2.417184 | 0.146247  | -0.324416 |
| C | 1.785304 | -1.221390 | 0.139124  |

|   |           |           |           |
|---|-----------|-----------|-----------|
| C | 2.581310  | -2.329578 | -0.604785 |
| C | 1.519467  | 1.260571  | 0.166329  |
| C | 0.114340  | 1.138449  | -0.421893 |
| C | -0.551760 | -0.108268 | 0.110032  |
| C | 0.302179  | -1.315442 | -0.292100 |
| O | 1.921679  | 2.599211  | -0.217977 |
| C | 0.821412  | 3.389047  | -0.247890 |
| C | -0.400387 | 2.523199  | -0.172092 |
| O | 2.052951  | -3.628485 | -0.374973 |
| C | 4.412298  | 1.093544  | 0.897613  |
| C | -1.617190 | 2.992512  | 0.089009  |
| O | 0.896364  | 4.590772  | -0.345777 |
| H | 2.372397  | 0.154478  | -1.424587 |
| C | 1.884362  | -1.411158 | 1.662909  |
| O | -1.845307 | -0.207039 | -0.516655 |
| C | -2.813213 | -0.871958 | 0.135311  |
| O | -2.659687 | -1.362680 | 1.235269  |
| C | -4.076480 | -0.950484 | -0.682777 |
| C | -5.358735 | -0.881151 | 0.155609  |
| C | -5.502943 | 0.486049  | 0.828232  |
| C | -6.571772 | -1.191867 | -0.722911 |
| H | 4.248815  | -2.542397 | 0.748065  |
| H | 4.581131  | -3.040708 | -0.910243 |
| H | 4.681615  | -0.731880 | -1.677493 |
| H | 5.723238  | -0.861213 | -0.259066 |
| H | 2.433623  | -2.160928 | -1.679069 |
| H | 1.473226  | 1.260525  | 1.262135  |
| H | 0.228745  | 1.019928  | -1.510798 |
| H | -0.698992 | -0.047459 | 1.191685  |
| H | 0.247378  | -1.399116 | -1.385270 |
| H | -0.134134 | -2.226869 | 0.124350  |
| H | 2.336140  | -3.934011 | 0.494628  |
| H | 5.471710  | 1.059911  | 1.140208  |
| H | 3.831423  | 1.888619  | 1.354972  |
| H | -2.479524 | 2.335171  | 0.138756  |
| H | -1.771802 | 4.054142  | 0.259976  |
| H | 2.898891  | -1.257634 | 2.037919  |
| H | 1.563634  | -2.421515 | 1.938198  |
| H | 1.232422  | -0.724063 | 2.208584  |
| H | -4.063833 | -0.163076 | -1.443205 |
| H | -4.027208 | -1.909361 | -1.215546 |
| H | -5.289797 | -1.646629 | 0.937394  |
| H | -4.670352 | 0.693278  | 1.509366  |
| H | -5.538551 | 1.285077  | 0.077172  |
| H | -6.426955 | 0.536710  | 1.413784  |
| H | -6.485398 | -2.179421 | -1.189137 |
| H | -6.676050 | -0.449514 | -1.524102 |
| H | -7.494774 | -1.177567 | -0.133720 |

$\omega$ B97XD energy = -1154.88198936 a.u.

(1R,5S,6R,7R,8S,10R)-**3**, Conf. E

|   |          |           |           |
|---|----------|-----------|-----------|
| C | 3.413477 | -2.875311 | -0.366533 |
| C | 4.282079 | -1.669135 | -0.752719 |
| C | 3.794134 | -0.404950 | -0.089690 |
| C | 2.333091 | -0.140565 | -0.372184 |
| C | 1.447049 | -1.321090 | 0.180999  |

|   |           |           |           |
|---|-----------|-----------|-----------|
| C | 1.923138  | -2.598195 | -0.565304 |
| C | 1.746985  | 1.156511  | 0.139094  |
| C | 0.309195  | 1.344559  | -0.342500 |
| C | -0.575214 | 0.286498  | 0.273492  |
| C | -0.045902 | -1.086587 | -0.152136 |
| O | 2.407273  | 2.362748  | -0.321547 |
| C | 1.512668  | 3.379816  | -0.297228 |
| C | 0.139249  | 2.812870  | -0.096835 |
| O | 1.140142  | -3.738933 | -0.241397 |
| C | 4.571642  | 0.358149  | 0.680907  |
| C | -0.914885 | 3.546585  | 0.248806  |
| O | 1.845552  | 4.531790  | -0.443740 |
| H | 2.210444  | -0.143650 | -1.466440 |
| C | 1.604508  | -1.493678 | 1.702056  |
| O | -1.904675 | 0.468814  | -0.251400 |
| C | -2.941923 | 0.105058  | 0.520086  |
| O | -2.812391 | -0.376300 | 1.627561  |
| C | -4.262255 | 0.404143  | -0.141885 |
| C | -5.303849 | -0.707884 | 0.046237  |
| C | -6.659044 | -0.243035 | -0.488424 |
| C | -4.856595 | -2.001792 | -0.637675 |
| H | 3.598834  | -3.138847 | 0.682912  |
| H | 3.689153  | -3.745935 | -0.970149 |
| H | 4.229957  | -1.533772 | -1.842104 |
| H | 5.329039  | -1.859172 | -0.500283 |
| H | 1.737687  | -2.432548 | -1.634249 |
| H | 1.788164  | 1.189707  | 1.234521  |
| H | 0.310282  | 1.190372  | -1.432857 |
| H | -0.619499 | 0.391364  | 1.360456  |
| H | -0.193619 | -1.170625 | -1.236629 |
| H | -0.644723 | -1.871521 | 0.316987  |
| H | 1.422634  | -4.081102 | 0.614761  |
| H | 5.612604  | 0.096057  | 0.854396  |
| H | 4.213195  | 1.270229  | 1.148401  |
| H | -1.894266 | 3.100948  | 0.390965  |
| H | -0.812329 | 4.617628  | 0.398971  |
| H | 1.169579  | -0.659605 | 2.258877  |
| H | 2.650552  | -1.575784 | 2.006682  |
| H | 1.075698  | -2.393485 | 2.033755  |
| H | -4.626697 | 1.335193  | 0.311712  |
| H | -4.097710 | 0.603599  | -1.205344 |
| H | -5.400711 | -0.898137 | 1.121579  |
| H | -6.603034 | -0.027082 | -1.562538 |
| H | -7.419997 | -1.017268 | -0.344144 |
| H | -7.001153 | 0.664481  | 0.020910  |
| H | -4.715270 | -1.843536 | -1.714020 |
| H | -5.607860 | -2.788264 | -0.510051 |
| H | -3.913450 | -2.375989 | -0.224272 |

ωB97XD energy = -1154.88195470 a.u.

(1R,5S,6R,7R,8S,10R)-**3**, Conf. F

|   |          |           |           |
|---|----------|-----------|-----------|
| C | 2.896109 | -3.121479 | -0.323130 |
| C | 3.876344 | -2.032263 | -0.782531 |
| C | 3.564812 | -0.703873 | -0.137618 |
| C | 2.130634 | -0.283825 | -0.363635 |
| C | 1.146020 | -1.341416 | 0.264172  |

|   |           |           |           |
|---|-----------|-----------|-----------|
| C | 1.439305  | -2.681711 | -0.465104 |
| C | 1.717801  | 1.082380  | 0.135807  |
| C | 0.287875  | 1.424670  | -0.282703 |
| C | -0.680654 | 0.485782  | 0.396869  |
| C | -0.323553 | -0.948015 | -0.011894 |
| O | 2.487317  | 2.193628  | -0.388654 |
| C | 1.717105  | 3.307234  | -0.351639 |
| C | 0.300085  | 2.907780  | -0.066303 |
| O | 0.548948  | -3.718734 | -0.076487 |
| C | 4.458700  | -0.015581 | 0.574939  |
| C | -0.642929 | 3.764547  | 0.314896  |
| O | 2.171920  | 4.408938  | -0.548571 |
| H | 1.956437  | -0.299899 | -1.450685 |
| C | 1.356454  | -1.492645 | 1.781000  |
| O | -2.002259 | 0.799776  | -0.079549 |
| C | -3.044284 | 0.479045  | 0.707141  |
| O | -2.915081 | 0.008926  | 1.820235  |
| C | -4.361334 | 0.754309  | 0.032863  |
| C | -4.933668 | -0.485071 | -0.699446 |
| C | -4.022655 | -0.961684 | -1.832801 |
| C | -5.260628 | -1.629904 | 0.260947  |
| H | 3.097621  | -3.378080 | 0.724938  |
| H | 3.044065  | -4.033253 | -0.910453 |
| H | 3.790492  | -1.919485 | -1.872393 |
| H | 4.905763  | -2.333348 | -0.568312 |
| H | 1.224718  | -2.520847 | -1.529341 |
| H | 1.816976  | 1.134773  | 1.226763  |
| H | 0.216537  | 1.250877  | -1.367827 |
| H | -0.665507 | 0.619623  | 1.481667  |
| H | -0.525073 | -1.038036 | -1.087176 |
| H | -0.984983 | -1.649959 | 0.502345  |
| H | 0.826439  | -4.066969 | 0.778881  |
| H | 5.468553  | -0.395112 | 0.711246  |
| H | 4.230547  | 0.942410  | 1.032238  |
| H | -1.657642 | 3.437338  | 0.518328  |
| H | -0.412755 | 4.819691  | 0.433037  |
| H | 2.401788  | -1.676769 | 2.039677  |
| H | 0.752931  | -2.322588 | 2.163064  |
| H | 1.039086  | -0.603472 | 2.332042  |
| H | -5.064665 | 1.072767  | 0.807080  |
| H | -4.233215 | 1.568700  | -0.685364 |
| H | -5.874260 | -0.138957 | -1.145236 |
| H | -3.768733 | -0.146635 | -2.518622 |
| H | -3.086546 | -1.378070 | -1.443701 |
| H | -4.517572 | -1.749459 | -2.410526 |
| H | -5.763816 | -2.442121 | -0.274635 |
| H | -5.919676 | -1.299624 | 1.070756  |
| H | -4.353515 | -2.043449 | 0.715428  |

ωB97XD energy = -1154.88113553 a.u.

(1R,5S,6R,7R,8S,10R)-**3**, Conf. G

|   |          |           |           |
|---|----------|-----------|-----------|
| C | 4.354646 | -1.724909 | -0.570292 |
| C | 4.652013 | -0.255906 | -0.905033 |
| C | 3.729715 | 0.679136  | -0.162413 |
| C | 2.272496 | 0.344250  | -0.387198 |
| C | 1.962759 | -1.113249 | 0.124944  |

|   |           |           |           |
|---|-----------|-----------|-----------|
| C | 2.870081  | -2.059039 | -0.709588 |
| C | 1.245871  | 1.274664  | 0.217992  |
| C | -0.176467 | 0.893024  | -0.193642 |
| C | -0.531380 | -0.466168 | 0.365215  |
| C | 0.488334  | -1.483319 | -0.153917 |
| O | 1.343545  | 2.660582  | -0.198638 |
| C | 0.122376  | 3.233378  | -0.074554 |
| C | -0.894199 | 2.158264  | 0.169416  |
| O | 2.624339  | -3.431479 | -0.432482 |
| C | 4.173118  | 1.664300  | 0.620671  |
| C | -2.106967 | 2.399701  | 0.658789  |
| O | -0.041308 | 4.426030  | -0.174669 |
| H | 2.105817  | 0.336286  | -1.475592 |
| C | 2.252633  | -1.267648 | 1.628086  |
| O | -1.824091 | -0.849385 | -0.144489 |
| C | -2.750336 | -1.312576 | 0.710574  |
| O | -2.572499 | -1.397136 | 1.910089  |
| C | -4.032548 | -1.683637 | 0.014136  |
| C | -4.949982 | -0.467051 | -0.256354 |
| C | -4.455639 | 0.385837  | -1.426525 |
| C | -6.376894 | -0.957251 | -0.512230 |
| H | 4.681382  | -1.940461 | 0.455193  |
| H | 4.924789  | -2.383107 | -1.233502 |
| H | 4.505299  | -0.104944 | -1.983746 |
| H | 5.697851  | -0.023122 | -0.685094 |
| H | 2.580762  | -1.934363 | -1.760883 |
| H | 1.335835  | 1.279018  | 1.310968  |
| H | -0.182895 | 0.813785  | -1.292160 |
| H | -0.581162 | -0.445461 | 1.455933  |
| H | 0.336298  | -1.571678 | -1.237322 |
| H | 0.274614  | -2.463202 | 0.281943  |
| H | 3.067410  | -3.668026 | 0.390795  |
| H | 5.239415  | 1.833708  | 0.749715  |
| H | 3.504382  | 2.341053  | 1.143690  |
| H | -2.815957 | 1.602906  | 0.858895  |
| H | -2.413468 | 3.418008  | 0.881071  |
| H | 1.567000  | -0.680376 | 2.245018  |
| H | 3.266286  | -0.956450 | 1.891195  |
| H | 2.121877  | -2.312186 | 1.929947  |
| H | -3.806446 | -2.187375 | -0.931764 |
| H | -4.547533 | -2.388612 | 0.670984  |
| H | -4.963750 | 0.151374  | 0.651782  |
| H | -5.091095 | 1.268926  | -1.552059 |
| H | -3.427528 | 0.728825  | -1.285639 |
| H | -4.489705 | -0.188827 | -2.360340 |
| H | -7.044550 | -0.115931 | -0.726163 |
| H | -6.776973 | -1.494062 | 0.354214  |
| H | -6.405623 | -1.635400 | -1.374045 |

ωB97XD energy = -1154.88035008 a.u.

(1R,5S,6R,7R,8S,10R)-**3**, Conf. H

|   |          |           |           |
|---|----------|-----------|-----------|
| C | 4.275912 | -1.725596 | -0.469241 |
| C | 4.603274 | -0.260837 | -0.793747 |
| C | 3.671647 | 0.685336  | -0.077149 |
| C | 2.218097 | 0.371753  | -0.351451 |
| C | 1.870087 | -1.081993 | 0.143539  |

|   |           |           |           |
|---|-----------|-----------|-----------|
| C | 2.792611  | -2.039137 | -0.661100 |
| C | 1.183437  | 1.313432  | 0.221476  |
| C | -0.229428 | 0.955522  | -0.243326 |
| C | -0.628420 | -0.400653 | 0.291008  |
| C | 0.401888  | -1.429425 | -0.189847 |
| O | 1.317521  | 2.699012  | -0.186290 |
| C | 0.101988  | 3.290578  | -0.104289 |
| C | -0.938176 | 2.230786  | 0.101787  |
| O | 2.517835  | -3.408368 | -0.396194 |
| C | 4.105610  | 1.659582  | 0.724785  |
| C | -2.160043 | 2.487873  | 0.558759  |
| O | -0.039571 | 4.485808  | -0.207398 |
| H | 2.088623  | 0.370497  | -1.445025 |
| C | 2.103035  | -1.246597 | 1.655447  |
| O | -1.904992 | -0.744541 | -0.284558 |
| C | -2.716403 | -1.562057 | 0.408126  |
| O | -2.475099 | -1.932927 | 1.539862  |
| C | -3.935507 | -1.960928 | -0.386442 |
| C | -4.983956 | -0.841363 | -0.585283 |
| C | -5.396790 | -0.220275 | 0.750189  |
| C | -4.545919 | 0.220603  | 1.596071  |
| H | 4.563671  | -1.944501 | 0.567225  |
| H | 4.859884  | -2.391332 | -1.112632 |
| H | 4.490411  | -0.107550 | -1.876227 |
| H | 5.645144  | -0.042024 | -0.543182 |
| H | 2.542204  | -1.908545 | -1.721760 |
| H | 1.233721  | 1.312442  | 1.317031  |
| H | -0.195163 | 0.883378  | -1.341759 |
| H | -0.729003 | -0.386918 | 1.378906  |
| H | 0.288839  | -1.508216 | -1.278873 |
| H | 0.162213  | -2.409261 | 0.231395  |
| H | 2.925787  | -3.652069 | 0.443018  |
| H | 5.170008  | 1.812001  | 0.886564  |
| H | 3.432213  | 2.344342  | 1.231102  |
| H | -2.883300 | 1.697854  | 0.730114  |
| H | -2.458762 | 3.508863  | 0.779280  |
| H | 1.396903  | -0.660212 | 2.249647  |
| H | 3.107890  | -0.942385 | 1.958131  |
| H | 1.955500  | -2.292334 | 1.944932  |
| H | -3.601544 | -2.326420 | -1.363391 |
| H | -4.393722 | -2.793128 | 0.153003  |
| H | -5.861983 | -1.347988 | -1.004192 |
| H | -4.558906 | 0.306468  | 1.222901  |
| H | -6.203910 | 0.505880  | 0.608700  |
| H | -5.745166 | -0.982223 | 1.455591  |
| H | -5.355372 | 0.937970  | -1.769400 |
| H | -4.288053 | -0.234053 | -2.558709 |
| H | -3.671354 | 0.777970  | -1.248778 |

ωB97XD energy = -1154.88030367 a.u.

(1R,5S,6R,7R,8S,10R)-**3**, Conf. I

|   |          |           |           |
|---|----------|-----------|-----------|
| C | 4.393243 | -1.703204 | -0.544666 |
| C | 4.660356 | -0.238515 | -0.919397 |
| C | 3.725808 | 0.701469  | -0.198077 |
| C | 2.272352 | 0.331372  | -0.394924 |
| C | 2.005410 | -1.118163 | 0.157505  |

|   |           |           |           |
|---|-----------|-----------|-----------|
| C | 2.918342  | -2.061548 | -0.674725 |
| C | 1.235699  | 1.253307  | 0.205301  |
| C | -0.186925 | 0.837370  | -0.178245 |
| C | -0.503248 | -0.515224 | 0.424818  |
| C | 0.532833  | -1.522964 | -0.081363 |
| O | 1.307942  | 2.628568  | -0.247033 |
| C | 0.080000  | 3.186251  | -0.135640 |
| C | -0.921283 | 2.106250  | 0.145655  |
| O | 2.785911  | -3.425939 | -0.296169 |
| C | 4.158733  | 1.716445  | 0.552182  |
| C | -2.138236 | 2.364105  | 0.616107  |
| O | -0.101767 | 4.372884  | -0.271227 |
| H | 2.089587  | 0.294833  | -1.480215 |
| C | 2.330733  | -1.238805 | 1.655738  |
| O | -1.783002 | -0.981025 | -0.047814 |
| C | -2.795908 | -1.113744 | 0.824469  |
| O | -2.713856 | -0.809848 | 1.998355  |
| C | -4.043226 | -1.646366 | 0.172381  |
| C | -4.982191 | -0.520036 | -0.316850 |
| C | -4.406856 | 0.220650  | -1.525664 |
| C | -6.354450 | -1.110926 | -0.644311 |
| H | 4.718330  | -1.894737 | 0.483969  |
| H | 4.972950  | -2.367040 | -1.193416 |
| H | 4.507243  | -0.117450 | -2.001224 |
| H | 5.702553  | 0.019219  | -0.710382 |
| H | 2.624078  | -1.949314 | -1.730575 |
| H | 1.341123  | 1.283277  | 1.296790  |
| H | -0.204663 | 0.722234  | -1.273594 |
| H | -0.534626 | -0.461993 | 1.515057  |
| H | 0.360890  | -1.652001 | -1.158651 |
| H | 0.336819  | -2.485957 | 0.402178  |
| H | 1.947096  | -3.767277 | -0.623671 |
| H | 5.223393  | 1.905706  | 0.666586  |
| H | 3.484496  | 2.395505  | 1.064771  |
| H | -2.849408 | 1.580480  | 0.852879  |
| H | -2.443647 | 3.391851  | 0.792051  |
| H | 3.295987  | -0.792532 | 1.905626  |
| H | 2.359108  | -2.295314 | 1.937748  |
| H | 1.577696  | -0.751641 | 2.281870  |
| H | -3.776830 | -2.292815 | -0.669724 |
| H | -4.559097 | -2.245760 | 0.927133  |
| H | -5.107416 | 0.194828  | 0.507295  |
| H | -3.435561 | 0.676302  | -1.312185 |
| H | -4.273733 | -0.467202 | -2.369692 |
| H | -5.085735 | 1.018129  | -1.845351 |
| H | -7.040805 | -0.331267 | -0.990823 |
| H | -6.275863 | -1.864295 | -1.437957 |
| H | -6.802903 | -1.589244 | 0.232838  |

ωB97XD energy = -1154.88013975 a.u.

(1*R*,5*S*,6*R*,7*R*,8*S*,10*R*)-**3**, Conf. J

|   |          |           |           |
|---|----------|-----------|-----------|
| C | 4.089322 | -2.152325 | -0.256933 |
| C | 4.662419 | -0.736961 | -0.424182 |
| C | 3.777530 | 0.302495  | 0.219316  |
| C | 2.348934 | 0.216591  | -0.267521 |
| C | 1.735834 | -1.189637 | 0.087240  |

|   |           |           |           |
|---|-----------|-----------|-----------|
| C | 2.615032  | -2.235261 | -0.652846 |
| C | 1.383214  | 1.277349  | 0.211901  |
| C | 0.016753  | 1.141607  | -0.462822 |
| C | -0.630488 | -0.151279 | -0.020167 |
| C | 0.288317  | -1.303565 | -0.445264 |
| O | 1.768448  | 2.640898  | -0.090808 |
| C | 0.650959  | 3.401953  | -0.160690 |
| C | -0.548602 | 2.503283  | -0.190254 |
| O | 2.122123  | -3.560582 | -0.509994 |
| C | 4.221768  | 1.168938  | 1.131918  |
| C | -1.790714 | 2.935001  | 0.006936  |
| O | 0.698053  | 4.608175  | -0.211308 |
| H | 2.378792  | 0.277644  | -1.366708 |
| C | 1.743224  | -1.455361 | 1.602785  |
| O | -1.901308 | -0.271154 | -0.690187 |
| C | -2.797257 | -1.124117 | -0.159498 |
| O | -2.586986 | -1.747907 | 0.861636  |
| C | -4.063133 | -1.201337 | -0.974810 |
| C | -5.305758 | -0.636566 | -0.247854 |
| C | -5.733515 | -1.484877 | 0.951260  |
| C | -5.101223 | 0.824796  | 0.155633  |
| H | 4.204517  | -2.474079 | 0.786155  |
| H | 4.654697  | -2.858632 | -0.872969 |
| H | 4.738323  | -0.513692 | -1.497601 |
| H | 5.674264  | -0.688422 | -0.011655 |
| H | 2.525137  | -2.025845 | -1.726297 |
| H | 1.270628  | 1.227156  | 1.301523  |
| H | 0.196234  | 1.074296  | -1.546963 |
| H | -0.814806 | -0.150387 | 1.057744  |
| H | 0.307224  | -1.314306 | -1.542966 |
| H | -0.138885 | -2.253675 | -0.117536 |
| H | 2.346275  | -3.885424 | 0.369992  |
| H | 5.262625  | 1.158720  | 1.446405  |
| H | 3.581730  | 1.922117  | 1.581412  |
| H | -2.635327 | 2.255231  | -0.021434 |
| H | -1.981819 | 3.986493  | 0.202191  |
| H | 2.735977  | -1.335788 | 2.042739  |
| H | 1.394669  | -2.473382 | 1.805990  |
| H | 1.070881  | -0.787169 | 2.146633  |
| H | -3.912805 | -0.667681 | -1.916304 |
| H | -4.227842 | -2.259746 | -1.203304 |
| H | -6.112060 | -0.673770 | -0.990784 |
| H | -5.895081 | -2.529846 | 0.665391  |
| H | -4.976199 | -1.468712 | 1.740768  |
| H | -6.669605 | -1.100791 | 1.371226  |
| H | -4.326812 | 0.913437  | 0.928028  |
| H | -6.023289 | 1.245724  | 0.569653  |
| H | -4.805769 | 1.440719  | -0.700936 |

ωB97XD energy = -1154.88005096 a.u.

3-deoxy-1,2;5,6-di-*O*-isopropylidene-3-*C*-

methylene-*α*-D-*ribo*-hexofuranose (**4**), Conf. A

|   |           |           |           |
|---|-----------|-----------|-----------|
| C | -1.191829 | -0.755905 | -0.862184 |
| O | -0.709663 | 0.353744  | -1.609734 |
| C | 0.165646  | 1.143387  | -0.810906 |

|   |           |           |           |
|---|-----------|-----------|-----------|
| C | -0.340227 | 0.953241  | 0.598172  |
| C | -1.008980 | -0.403139 | 0.632449  |
| O | -2.315784 | -0.416657 | 1.164534  |
| C | -3.239972 | -0.334316 | 0.082868  |
| O | -2.560102 | -0.936197 | -1.018523 |
| C | -4.448296 | -1.182158 | 0.424524  |
| C | -3.609266 | 1.114144  | -0.228593 |
| C | -0.308187 | 1.831351  | 1.594199  |
| C | 1.613303  | 0.693846  | -1.024682 |
| C | 2.678702  | 1.525654  | -0.310513 |
| O | 3.689812  | 0.575688  | -0.043723 |
| C | 3.046045  | -0.659535 | 0.221788  |
| O | 1.803804  | -0.608211 | -0.488256 |
| C | 2.756051  | -0.820065 | 1.710285  |
| C | 3.908263  | -1.774053 | -0.339347 |
| H | 0.069006  | 2.182101  | -1.147539 |
| H | 1.795768  | 0.665488  | -2.106772 |
| H | -0.686174 | -1.661239 | -1.201402 |
| H | -0.406629 | -1.135043 | 1.174838  |
| H | -4.131418 | -2.207271 | 0.625041  |
| H | -4.943947 | -0.778006 | 1.310602  |
| H | -5.155635 | -1.179678 | -0.408286 |
| H | -4.308726 | 1.140427  | -1.068024 |
| H | -4.080703 | 1.569304  | 0.646456  |
| H | -2.726905 | 1.696193  | -0.497425 |
| H | -0.755242 | 1.598901  | 2.555873  |
| H | 0.136592  | 2.815452  | 1.474458  |
| H | 2.293457  | 1.965607  | 0.619517  |
| H | 3.102413  | 2.313161  | -0.935783 |
| H | 2.223385  | -1.758724 | 1.886509  |
| H | 2.132568  | 0.003836  | 2.067402  |
| H | 3.692008  | -0.832987 | 2.274815  |
| H | 4.877830  | -1.788134 | 0.164995  |
| H | 3.417022  | -2.738687 | -0.190040 |
| H | 4.063284  | -1.612348 | -1.407987 |

ωB97XD energy = -883.305951357 a.u.

3-deoxy-1,2;5,6-di-*O*-isopropylidene-3-*C*-methylene- $\alpha$ -D-*ribo*-hexofuranose (4), Conf. B

|   |           |           |           |
|---|-----------|-----------|-----------|
| C | 1.955967  | 0.370095  | -1.302827 |
| O | 0.673528  | -0.227599 | -1.380356 |
| C | -0.198813 | 0.235074  | -0.343120 |
| C | 0.456456  | 1.495451  | 0.170619  |
| C | 1.922277  | 1.316808  | -0.097068 |
| O | 2.538279  | 0.554701  | 0.931942  |
| C | 3.190215  | -0.592574 | 0.387251  |
| O | 2.974050  | -0.532658 | -1.020838 |
| C | 4.685315  | -0.502925 | 0.642320  |
| C | 2.565350  | -1.850367 | 0.973293  |
| C | -0.113124 | 2.578035  | 0.690213  |
| C | -1.591163 | 0.397377  | -0.952831 |
| C | -2.171366 | -0.929427 | -1.437682 |
| O | -2.781202 | -1.437130 | -0.263804 |
| C | -3.301442 | -0.330115 | 0.450970  |
| O | -2.526188 | 0.802698  | 0.033990  |
| C | -3.096621 | -0.577198 | 1.934893  |

|   |           |           |           |
|---|-----------|-----------|-----------|
| C | -4.759428 | -0.074771 | 0.087991  |
| H | -0.251347 | -0.521493 | 0.454072  |
| H | -1.554354 | 1.158048  | -1.738657 |
| H | 2.176999  | 0.824098  | -2.270230 |
| H | 2.459338  | 2.257922  | -0.252089 |
| H | 5.196804  | -1.350971 | 0.179727  |
| H | 5.077438  | 0.423861  | 0.217301  |
| H | 4.880100  | -0.513710 | 1.717632  |
| H | 3.056562  | -2.736448 | 0.563369  |
| H | 2.678905  | -1.849619 | 2.060470  |
| H | 1.503277  | -1.896234 | 0.724376  |
| H | 0.493735  | 3.428962  | 0.986438  |
| H | -1.185159 | 2.635344  | 0.843124  |
| H | -1.416432 | -1.640099 | -1.774426 |
| H | -2.911314 | -0.770610 | -2.233756 |
| H | -2.033893 | -0.720699 | 2.142033  |
| H | -3.643513 | -1.471161 | 2.245544  |
| H | -3.459153 | 0.278595  | 2.509818  |
| H | -4.864673 | 0.056230  | -0.992021 |
| H | -5.378100 | -0.918578 | 0.404560  |
| H | -5.114712 | 0.833676  | 0.581109  |

ωB97XD energy = -883.305403735 a.u.

3-deoxy-1,2;5,6-di-*O*-isopropylidene-3-*C*-methylene- $\alpha$ -D-*ribo*-hexofuranose (4), Conf. C

|   |           |           |           |
|---|-----------|-----------|-----------|
| C | -1.890925 | -1.415763 | 0.202576  |
| O | -0.540476 | -1.620572 | -0.085293 |
| C | 0.211861  | -0.433173 | 0.176805  |
| C | -0.580697 | 0.297797  | 1.238165  |
| C | -1.967565 | -0.324758 | 1.283853  |
| O | -3.029254 | 0.510771  | 0.880796  |
| C | -3.198569 | 0.382320  | -0.527173 |
| O | -2.616280 | -0.874733 | -0.874795 |
| C | -4.687060 | 0.335358  | -0.821955 |
| C | -2.497048 | 1.512165  | -1.273257 |
| C | -0.178169 | 1.305907  | 2.005585  |
| C | 1.621881  | -0.873174 | 0.576644  |
| C | 2.343939  | -1.601148 | -0.556077 |
| O | 2.935145  | -0.532184 | -1.272770 |
| C | 3.318649  | 0.444434  | -0.322345 |
| O | 2.450395  | 0.255004  | 0.803600  |
| C | 3.086303  | 1.817866  | -0.926032 |
| C | 4.757259  | 0.234702  | 0.136263  |
| H | 0.283494  | 0.162675  | -0.745048 |
| H | 1.567764  | -1.463570 | 1.496347  |
| H | -2.307136 | -2.391952 | 0.457848  |
| H | -2.207850 | -0.707303 | 2.278177  |
| H | -4.852015 | 0.207461  | -1.894648 |
| H | -5.139840 | -0.503022 | -0.288748 |
| H | -5.161499 | 1.264939  | -0.497487 |
| H | -2.962488 | 2.467699  | -1.018440 |
| H | -1.440353 | 1.563459  | -1.005612 |
| H | -2.581415 | 1.350121  | -2.350893 |
| H | -0.854548 | 1.743911  | 2.734268  |
| H | 0.820408  | 1.719579  | 1.918210  |
| H | 1.673650  | -2.141694 | -1.224548 |



|   |          |           |           |
|---|----------|-----------|-----------|
| H | 3.105466 | -2.288424 | -0.163528 |
| H | 3.696321 | 1.941223  | -1.824382 |
| H | 3.355325 | 2.593965  | -0.205063 |
| H | 2.033050 | 1.929567  | -1.193568 |
| H | 5.005751 | 0.948239  | 0.926038  |
| H | 4.886920 | -0.775512 | 0.532963  |
| H | 5.443595 | 0.377171  | -0.702502 |

ωB97XD energy = -883.305394979 a.u.

3-deoxy-1,2;5,6-di-*O*-isopropylidene-3-*C*-methylene-*α*-D-*ribo*-hexofuranose (4), Conf. D

|   |           |           |           |
|---|-----------|-----------|-----------|
| C | -1.218280 | -0.545626 | -1.035245 |
| O | -0.709104 | 0.690983  | -1.512544 |
| C | 0.183493  | 1.267578  | -0.565884 |
| C | -0.275134 | 0.736294  | 0.770759  |
| C | -0.998186 | -0.563890 | 0.494290  |
| O | -2.297297 | -0.660982 | 1.040111  |
| C | -3.233549 | -0.292966 | 0.031927  |
| O | -2.595244 | -0.640675 | -1.196724 |
| C | -4.470090 | -1.154393 | 0.187729  |
| C | -3.549219 | 1.200280  | 0.081032  |
| C | -0.146633 | 1.314902  | 1.958519  |
| C | 1.626942  | 0.884912  | -0.916399 |
| C | 2.705244  | 1.557146  | -0.044690 |
| O | 3.162821  | 0.526216  | 0.802953  |
| C | 2.971111  | -0.698728 | 0.121278  |
| O | 1.810359  | -0.504242 | -0.683155 |
| C | 2.686172  | -1.776588 | 1.147377  |
| C | 4.166414  | -1.024277 | -0.771643 |
| H | 0.079798  | 2.356359  | -0.640960 |
| H | 1.776045  | 1.099966  | -1.981193 |
| H | -0.752471 | -1.361639 | -1.590289 |
| H | -0.420210 | -1.427673 | 0.829592  |
| H | -5.188915 | -0.921976 | -0.601720 |
| H | -4.192786 | -2.208171 | 0.123111  |
| H | -4.936396 | -0.963227 | 1.157421  |
| H | -4.251164 | 1.453187  | -0.717650 |
| H | -3.997931 | 1.449005  | 1.046342  |
| H | -2.645991 | 1.796775  | -0.052998 |
| H | -0.547377 | 0.845651  | 2.851640  |
| H | 0.344566  | 2.275872  | 2.079141  |
| H | 2.314272  | 2.361825  | 0.583312  |
| H | 3.521052  | 1.957611  | -0.660289 |
| H | 1.851619  | -1.462341 | 1.777951  |
| H | 3.565183  | -1.937482 | 1.776205  |
| H | 2.434991  | -2.714347 | 0.645569  |
| H | 4.325048  | -0.232588 | -1.509673 |
| H | 5.071274  | -1.125546 | -0.166939 |
| H | 3.987388  | -1.959530 | -1.308001 |

ωB97XD energy = -883.305310724 a.u.

3-deoxy-1,2;5,6-di-*O*-isopropylidene-3-*C*-methylene-*α*-D-*ribo*-hexofuranose (4), Conf. E

|   |           |           |           |
|---|-----------|-----------|-----------|
| C | 1.923510  | -1.072153 | -0.894897 |
| O | 0.576317  | -1.366057 | -0.668159 |
| C | -0.114740 | -0.203483 | -0.208423 |

|   |           |           |           |
|---|-----------|-----------|-----------|
| C | 0.665300  | 0.959514  | -0.780945 |
| C | 2.012821  | 0.425365  | -1.237831 |
| O | 3.134412  | 0.893638  | -0.523240 |
| C | 3.360246  | 0.031173  | 0.586585  |
| O | 2.724107  | -1.204213 | 0.253583  |
| C | 4.855473  | -0.200259 | 0.709314  |
| C | 2.757204  | 0.605158  | 1.863999  |
| C | 0.266787  | 2.223480  | -0.878879 |
| C | -1.559670 | -0.331916 | -0.665328 |
| C | -2.244201 | -1.609759 | -0.184119 |
| O | -3.593479 | -1.203461 | -0.064066 |
| C | -3.592332 | 0.147252  | 0.363067  |
| O | -2.336719 | 0.691577  | -0.064760 |
| C | -3.668207 | 0.244348  | 1.882442  |
| C | -4.728783 | 0.869035  | -0.337474 |
| H | -0.106560 | -0.178214 | 0.892032  |
| H | -1.608049 | -0.246897 | -1.759381 |
| H | 2.269963  | -1.773778 | -1.655695 |
| H | 2.190181  | 0.623747  | -2.296937 |
| H | 5.061873  | -0.885973 | 1.534873  |
| H | 5.237444  | -0.632397 | -0.217821 |
| H | 5.364674  | 0.748050  | 0.898851  |
| H | 2.873805  | -0.111574 | 2.680992  |
| H | 3.266342  | 1.535644  | 2.127402  |
| H | 1.695739  | 0.821174  | 1.731527  |
| H | 0.920702  | 2.976266  | -1.309731 |
| H | -0.708527 | 2.536382  | -0.520480 |
| H | -1.834439 | -1.941647 | 0.780828  |
| H | -2.188660 | -2.430500 | -0.898365 |
| H | -2.852354 | -0.322414 | 2.338962  |
| H | -4.620510 | -0.157221 | 2.238485  |
| H | -3.579730 | 1.288048  | 2.195108  |
| H | -5.685793 | 0.420071  | -0.059623 |
| H | -4.735282 | 1.924599  | -0.054236 |
| H | -4.598375 | 0.788229  | -1.418714 |

ωB97XD energy = -883.304695831 a.u.

3-deoxy-1,2;5,6-di-*O*-isopropylidene-3-*C*-methylene-*α*-D-*ribo*-hexofuranose (4), Conf. F

|   |           |           |           |
|---|-----------|-----------|-----------|
| C | 1.970440  | 0.221776  | -1.306214 |
| O | 0.695210  | -0.394171 | -1.229231 |
| C | -0.113115 | 0.174404  | -0.194128 |
| C | 0.553368  | 1.489811  | 0.130189  |
| C | 2.000666  | 1.297954  | -0.213538 |
| O | 2.696170  | 0.661357  | 0.849280  |
| C | 3.330120  | -0.533234 | 0.392805  |
| O | 3.020535  | -0.633349 | -0.995402 |
| C | 4.836907  | -0.401524 | 0.535671  |
| C | 2.764862  | -1.722853 | 1.155382  |
| C | -0.014725 | 2.612156  | 0.557300  |
| C | -1.538637 | 0.253804  | -0.719160 |
| C | -2.090633 | -1.094689 | -1.188600 |
| O | -3.463068 | -0.998438 | -0.861685 |
| C | -3.550741 | -0.255279 | 0.338866  |
| O | -2.418230 | 0.623300  | 0.331501  |
| C | -3.463535 | -1.165197 | 1.560974  |

|   |           |           |           |
|---|-----------|-----------|-----------|
| C | -4.825216 | 0.566055  | 0.305935  |
| H | -0.106963 | -0.485470 | 0.687785  |
| H | -1.589474 | 1.001615  | -1.521472 |
| H | 2.118818  | 0.565734  | -2.331069 |
| H | 2.511190  | 2.220008  | -0.508769 |
| H | 5.331879  | -1.287893 | 0.130787  |
| H | 5.182806  | 0.479760  | -0.009292 |
| H | 5.101882  | -0.295309 | 1.590535  |
| H | 3.255356  | -2.643234 | 0.828542  |
| H | 2.931483  | -1.589168 | 2.227238  |
| H | 1.693180  | -1.815260 | 0.968145  |
| H | 0.579469  | 3.506198  | 0.722111  |
| H | -1.078986 | 2.661503  | 0.764200  |
| H | -1.608165 | -1.929833 | -0.660812 |
| H | -1.995893 | -1.252936 | -2.262166 |
| H | -4.316543 | -1.848513 | 1.582422  |
| H | -3.461659 | -0.564636 | 2.474251  |
| H | -2.541822 | -1.752785 | 1.536949  |
| H | -4.822667 | 1.208167  | -0.577285 |
| H | -5.695545 | -0.094058 | 0.266824  |
| H | -4.891839 | 1.187410  | 1.202490  |

ωB97XD energy = -883.304602007 a.u.

3-deoxy-1,2;5,6-di-*O*-isopropylidene-3-*C*-methylene- $\alpha$ -D-*ribo*-hexofuranose (4), Conf. G

|   |           |           |           |
|---|-----------|-----------|-----------|
| C | 1.225170  | -0.781660 | -0.783002 |
| O | 0.102270  | -0.773823 | 0.060947  |
| C | -0.166509 | 0.503810  | 0.630146  |
| C | 0.816638  | 1.461557  | -0.005210 |
| C | 1.704222  | 0.675866  | -0.948371 |
| O | 3.071279  | 0.650413  | -0.600293 |
| C | 3.318500  | -0.521123 | 0.171920  |
| O | 2.330515  | -1.455724 | -0.254988 |
| C | 4.685678  | -1.057599 | -0.203118 |
| C | 3.193274  | -0.241981 | 1.666932  |
| C | 0.914129  | 2.768561  | 0.217676  |
| C | -1.620961 | 0.907930  | 0.377493  |
| C | -2.058357 | 0.851061  | -1.093878 |
| O | -3.383707 | 0.371010  | -1.023032 |
| C | -3.455634 | -0.491016 | 0.101678  |
| O | -2.515230 | 0.036635  | 1.039571  |
| C | -3.066543 | -1.918265 | -0.268902 |
| C | -4.848801 | -0.388336 | 0.691008  |
| H | -0.024112 | 0.438539  | 1.716318  |
| H | -1.755124 | 1.918886  | 0.786057  |
| H | 0.935397  | -1.299991 | -1.699929 |
| H | 1.629621  | 1.044450  | -1.974583 |
| H | 4.725440  | -1.238431 | -1.278826 |
| H | 5.456864  | -0.332813 | 0.068941  |
| H | 4.876916  | -1.994256 | 0.326061  |
| H | 2.207401  | 0.152931  | 1.916598  |
| H | 3.345089  | -1.168633 | 2.225769  |
| H | 3.945379  | 0.490133  | 1.971335  |
| H | 1.662920  | 3.365456  | -0.293990 |
| H | 0.273964  | 3.280149  | 0.930905  |
| H | -1.419242 | 0.169884  | -1.672122 |

|   |           |           |           |
|---|-----------|-----------|-----------|
| H | -2.071631 | 1.829911  | -1.574871 |
| H | -2.050844 | -1.944405 | -0.669473 |
| H | -3.765833 | -2.314420 | -1.010331 |
| H | -3.091682 | -2.550631 | 0.622362  |
| H | -5.587142 | -0.756119 | -0.026077 |
| H | -4.911795 | -0.986268 | 1.603431  |
| H | -5.067439 | 0.654720  | 0.928544  |

ωB97XD energy = -883.303517017 a.u.

3-deoxy-1,2;5,6-di-*O*-isopropylidene-3-*C*-methylene- $\alpha$ -D-*ribo*-hexofuranose (4), Conf. H

|   |           |           |           |
|---|-----------|-----------|-----------|
| C | 1.359297  | -0.215722 | -1.096204 |
| O | 0.202381  | -0.507262 | -0.334066 |
| C | -0.122185 | 0.535924  | 0.586486  |
| C | 0.753994  | 1.702633  | 0.183608  |
| C | 1.915622  | 1.106018  | -0.555137 |
| O | 2.930446  | 0.685622  | 0.344073  |
| C | 3.211866  | -0.706007 | 0.168387  |
| O | 2.385313  | -1.132643 | -0.911847 |
| C | 4.661954  | -0.884899 | -0.244395 |
| C | 2.859748  | -1.457918 | 1.444082  |
| C | 0.551017  | 3.001015  | 0.384268  |
| C | -1.617235 | 0.834421  | 0.551483  |
| C | -2.189003 | 1.106342  | -0.848342 |
| O | -3.449241 | 0.471117  | -0.817384 |
| C | -3.330095 | -0.651201 | 0.041461  |
| O | -2.365123 | -0.270107 | 1.024321  |
| C | -2.837541 | -1.879913 | -0.716381 |
| C | -4.666485 | -0.872595 | 0.722478  |
| H | 0.129546  | 0.199822  | 1.601861  |
| H | -1.803498 | 1.681900  | 1.224694  |
| H | 1.093595  | -0.231689 | -2.155823 |
| H | 2.332263  | 1.765050  | -1.323487 |
| H | 4.868893  | -1.940996 | -0.435212 |
| H | 4.859980  | -0.313546 | -1.154052 |
| H | 5.322459  | -0.531914 | 0.551369  |
| H | 1.795671  | -1.350521 | 1.661961  |
| H | 3.081856  | -2.520940 | 1.321272  |
| H | 3.441937  | -1.064310 | 2.281125  |
| H | 1.264816  | 3.734858  | 0.022547  |
| H | -0.312317 | 3.378753  | 0.923434  |
| H | -1.542824 | 0.679468  | -1.626293 |
| H | -2.344327 | 2.167220  | -1.048897 |
| H | -1.863633 | -1.684975 | -1.170048 |
| H | -3.558366 | -2.153188 | -1.491737 |
| H | -2.722991 | -2.717042 | -0.022776 |
| H | -5.425035 | -1.136779 | -0.018597 |
| H | -4.583915 | -1.684436 | 1.449243  |
| H | -4.970024 | 0.040856  | 1.237870  |

ωB97XD energy = -883.303403171 a.u.

3-deoxy-1,2;5,6-di-*O*-isopropylidene-3-*C*-methylene- $\alpha$ -D-*ribo*-hexofuranose (4), Conf. I

|   |           |           |           |
|---|-----------|-----------|-----------|
| C | 0.926439  | -0.674188 | -0.597053 |
| O | 0.080223  | -0.549231 | 0.529179  |
| C | -0.253949 | 0.804899  | 0.798479  |

|   |           |           |           |
|---|-----------|-----------|-----------|
| C | 0.797230  | 1.633244  | 0.097561  |
| C | 1.516408  | 0.727764  | -0.878945 |
| O | 2.903157  | 0.583340  | -0.653014 |
| C | 3.127489  | -0.642297 | 0.040956  |
| O | 2.032462  | -1.473959 | -0.336554 |
| C | 4.404695  | -1.263815 | -0.486109 |
| C | 3.160175  | -0.421693 | 1.550923  |
| C | 1.059508  | 2.920477  | 0.299642  |
| C | -1.679683 | 1.153489  | 0.333519  |
| C | -1.975786 | 0.901565  | -1.148517 |
| O | -2.466820 | -0.419860 | -1.159167 |
| C | -3.165885 | -0.622002 | 0.061280  |
| O | -2.632984 | 0.338460  | 0.982355  |
| C | -2.878740 | -2.028073 | 0.550811  |
| C | -4.653137 | -0.340208 | -0.119485 |
| H | -0.224995 | 0.936129  | 1.885853  |
| H | -1.865740 | 2.199613  | 0.604959  |
| H | 0.364812  | -1.135755 | -1.413325 |
| H | 1.381450  | 1.054030  | -1.914363 |
| H | 4.574926  | -2.230393 | -0.005709 |
| H | 4.322511  | -1.407445 | -1.564977 |
| H | 5.252015  | -0.607937 | -0.271877 |
| H | 2.229141  | 0.023082  | 1.905183  |
| H | 3.296723  | -1.379679 | 2.058831  |
| H | 3.988961  | 0.243361  | 1.807117  |
| H | 1.841121  | 3.427425  | -0.257830 |
| H | 0.521996  | 3.500776  | 1.044751  |
| H | -1.103104 | 0.952687  | -1.803650 |
| H | -2.727703 | 1.612239  | -1.519142 |
| H | -3.236506 | -2.757406 | -0.180956 |
| H | -3.389757 | -2.201391 | 1.501458  |
| H | -1.802945 | -2.144008 | 0.690593  |
| H | -4.804700 | 0.666762  | -0.518095 |
| H | -5.089168 | -1.064471 | -0.812558 |
| H | -5.165921 | -0.412582 | 0.842981  |

ωB97XD energy = -883.303265994 a.u.

Methyl 5-deoxy-2,3-*O*-isopropylidene-β-D-*erythro*-pent-4-enofuranoside (**5**), Conf. A

|   |           |           |           |
|---|-----------|-----------|-----------|
| C | -1.339882 | -0.732260 | 0.333820  |
| O | -1.286810 | 0.616426  | 0.782478  |
| C | -0.629123 | 1.387533  | -0.144541 |
| C | 0.209325  | 0.498829  | -1.049048 |
| C | -0.118826 | -0.923911 | -0.565480 |
| C | -0.718289 | 2.712405  | -0.166322 |
| O | 1.604449  | 0.615407  | -0.871508 |
| C | 2.014999  | -0.294561 | 0.140223  |
| O | 1.022938  | -1.325894 | 0.154209  |
| C | 3.343604  | -0.895908 | -0.279120 |
| C | 2.078985  | 0.379780  | 1.506416  |
| O | -2.464026 | -0.966116 | -0.449025 |
| C | -3.693237 | -0.791520 | 0.234291  |
| H | -1.330448 | -1.358524 | 1.233537  |
| H | -0.006819 | 0.680290  | -2.102320 |
| H | -0.335808 | -1.640790 | -1.359767 |

|   |           |           |           |
|---|-----------|-----------|-----------|
| H | -0.135872 | 3.274910  | -0.885644 |
| H | -1.340042 | 3.248804  | 0.540628  |
| H | 3.236722  | -1.374397 | -1.254649 |
| H | 4.103902  | -0.113561 | -0.343258 |
| H | 3.663563  | -1.640637 | 0.453637  |
| H | 1.108307  | 0.796494  | 1.781598  |
| H | 2.372524  | -0.353061 | 2.262657  |
| H | 2.816681  | 1.185958  | 1.486722  |
| H | -3.834463 | 0.251914  | 0.532835  |
| H | -3.736811 | -1.433122 | 1.125072  |
| H | -4.479184 | -1.085175 | -0.461707 |

ωB97XD energy = -652.084348640 a.u.

Methyl 5-deoxy-2,3-*O*-isopropylidene-β-D-*erythro*-pent-4-enofuranoside (**5**), Conf. B

|   |           |           |           |
|---|-----------|-----------|-----------|
| C | -1.316799 | -0.759426 | 0.343747  |
| O | -1.460440 | 0.560002  | 0.849346  |
| C | -0.873386 | 1.442419  | -0.023916 |
| C | 0.240800  | 0.736430  | -0.758109 |
| C | -0.026994 | -0.759114 | -0.478308 |
| C | -1.247806 | 2.711573  | -0.132444 |
| O | 1.491279  | 0.990578  | -0.137062 |
| C | 2.127728  | -0.255530 | 0.105753  |
| O | 1.063001  | -1.174902 | 0.311960  |
| C | 2.965384  | -0.670623 | -1.102260 |
| C | 2.931658  | -0.150752 | 1.383935  |
| O | -2.356777 | -1.092410 | -0.517456 |
| C | -3.631185 | -1.110000 | 0.101825  |
| H | -1.278438 | -1.425572 | 1.213279  |
| H | 0.273793  | 0.995467  | -1.820274 |
| H | -0.140519 | -1.373051 | -1.376009 |
| H | -0.711298 | 3.373028  | -0.801442 |
| H | -2.060893 | 3.111490  | 0.461501  |
| H | 2.344391  | -0.736032 | -2.000809 |
| H | 3.751765  | 0.067035  | -1.280444 |
| H | 3.422701  | -1.647521 | -0.926034 |
| H | 2.270601  | 0.142189  | 2.201486  |
| H | 3.393266  | -1.113598 | 1.615576  |
| H | 3.716557  | 0.600537  | 1.268877  |
| H | -3.905116 | -0.116242 | 0.469621  |
| H | -3.646346 | -1.822957 | 0.937619  |
| H | -4.343374 | -1.430772 | -0.658587 |

ωB97XD energy = -652.083100275 a.u.

Methyl 5-deoxy-2,3-*O*-isopropylidene-β-D-*erythro*-pent-4-enofuranoside (**5**), Conf. C

|   |           |           |           |
|---|-----------|-----------|-----------|
| C | -1.249751 | -0.770852 | 0.747729  |
| O | -1.299095 | 0.632806  | 0.989108  |
| C | -0.757161 | 1.344393  | -0.048393 |
| C | 0.014221  | 0.420337  | -0.976036 |
| C | -0.192578 | -0.971001 | -0.356219 |
| C | -0.898224 | 2.661119  | -0.162649 |
| O | 1.411994  | 0.607561  | -0.978043 |
| C | 1.981404  | -0.224687 | 0.024144  |
| O | 1.068807  | -1.315971 | 0.170200  |
| C | 3.300625  | -0.761439 | -0.496669 |

|   |           |           |           |
|---|-----------|-----------|-----------|
| C | 2.129357  | 0.515824  | 1.349741  |
| O | -2.506464 | -1.281114 | 0.441202  |
| C | -3.167969 | -0.686530 | -0.662047 |
| H | -0.948601 | -1.260599 | 1.673891  |
| H | -0.332661 | 0.514268  | -2.007150 |
| H | -0.507352 | -1.746667 | -1.058542 |
| H | -0.420752 | 3.176428  | -0.986917 |
| H | -1.457839 | 3.235814  | 0.565650  |
| H | 3.138153  | -1.273539 | -1.446983 |
| H | 4.006965  | 0.058910  | -0.645742 |
| H | 3.723801  | -1.465653 | 0.223758  |
| H | 2.544754  | -0.161106 | 2.100976  |
| H | 2.803067  | 1.367352  | 1.225268  |
| H | 1.165087  | 0.882944  | 1.707161  |
| H | -4.120334 | -1.206761 | -0.763353 |
| H | -2.602413 | -0.808845 | -1.596758 |
| H | -3.353355 | 0.378208  | -0.488594 |

ωB97XD energy = -652.080400985 a.u.

#### Bicyclomycin (6), Conf. A

|   |           |           |           |
|---|-----------|-----------|-----------|
| N | -1.972387 | 1.334565  | -0.390008 |
| C | -2.455493 | 0.294171  | 0.515141  |
| C | -1.301207 | -0.120368 | 1.450295  |
| N | -0.070487 | -0.129909 | 0.910717  |
| C | 0.255325  | 0.322759  | -0.429047 |
| C | -0.719691 | 1.444762  | -0.864075 |
| O | -0.359227 | 2.336850  | -1.623706 |
| O | -1.562717 | -0.414515 | 2.607620  |
| C | -2.970793 | -0.916084 | -0.276210 |
| O | -3.450242 | 0.874886  | 1.290974  |
| C | -1.966207 | -1.818576 | -0.957884 |
| C | -4.281505 | -1.146915 | -0.335733 |
| C | -0.986745 | -1.166756 | -1.945688 |
| O | 0.241088  | -0.714082 | -1.383405 |
| C | 1.699234  | 0.887345  | -0.473356 |
| C | 2.819286  | 0.009601  | 0.142271  |
| C | 2.776152  | -1.468402 | -0.272417 |
| O | 3.849231  | -2.189308 | 0.293318  |
| C | 4.172579  | 0.627622  | -0.213391 |
| O | 2.656621  | -0.019839 | 1.570245  |
| O | 1.757330  | 2.111877  | 0.228520  |
| H | 1.915032  | 1.032559  | -1.536667 |
| H | -2.656073 | 2.013099  | -0.702219 |
| H | 0.714356  | -0.337726 | 1.527459  |
| H | -3.306827 | 0.547431  | 2.195095  |
| H | -2.533178 | -2.570682 | -1.514666 |
| H | -1.377327 | -2.367237 | -0.212096 |
| H | -4.674770 | -1.981789 | -0.908065 |
| H | -4.985200 | -0.514393 | 0.192814  |
| H | -1.472575 | -0.357286 | -2.506146 |
| H | -0.661679 | -1.918253 | -2.666985 |
| H | 2.868987  | -1.553816 | -1.357024 |
| H | 1.817964  | -1.912956 | 0.016109  |
| H | 3.797371  | -2.081013 | 1.249272  |
| H | 4.972305  | 0.057079  | 0.260560  |

|   |          |          |           |
|---|----------|----------|-----------|
| H | 4.218681 | 1.668362 | 0.115950  |
| H | 4.329803 | 0.601532 | -1.296128 |
| H | 2.730886 | 0.886259 | 1.894039  |
| H | 1.300083 | 2.774336 | -0.304225 |

ωB97XD energy = -1103.92528994 a.u.

#### Bicyclomycin (6), Conf. B

|   |           |           |           |
|---|-----------|-----------|-----------|
| N | -1.523468 | -0.811071 | -1.243330 |
| C | -2.535133 | 0.010030  | -0.585353 |
| C | -1.937159 | 1.403991  | -0.328025 |
| N | -0.620309 | 1.443164  | -0.061853 |
| C | 0.286077  | 0.313637  | -0.037049 |
| C | -0.191807 | -0.731397 | -1.074804 |
| O | 0.581548  | -1.466412 | -1.676803 |
| O | -2.671683 | 2.378561  | -0.380979 |
| C | -2.984141 | -0.637777 | 0.730756  |
| O | -3.582259 | 0.147326  | -1.487500 |
| C | -2.036587 | -0.605816 | 1.908751  |
| C | -4.188313 | -1.201740 | 0.806835  |
| C | -0.634752 | -1.195449 | 1.699403  |
| O | 0.357248  | -0.269694 | 1.254825  |
| C | 1.718488  | 0.879937  | -0.376136 |
| C | 2.950809  | 0.157475  | 0.259289  |
| C | 3.014463  | -1.375091 | 0.106018  |
| O | 3.257508  | -1.796971 | -1.210149 |
| C | 4.225590  | 0.762161  | -0.323706 |
| O | 2.953685  | 0.485872  | 1.652102  |
| O | 1.773470  | 2.231179  | 0.042728  |
| H | 1.811628  | 0.871990  | -1.465531 |
| H | -1.865274 | -1.523039 | -1.877468 |
| H | -0.179248 | 2.344176  | 0.103632  |
| H | -3.880302 | 1.069352  | -1.412668 |
| H | -2.506381 | -1.169860 | 2.720022  |
| H | -1.918111 | 0.420623  | 2.278170  |
| H | -4.518899 | -1.688993 | 1.719197  |
| H | -4.871124 | -1.180462 | -0.034670 |
| H | -0.664241 | -2.068282 | 1.034677  |
| H | -0.243805 | -1.529016 | 2.662371  |
| H | 2.108417  | -1.839008 | 0.516249  |
| H | 3.861188  | -1.700496 | 0.718629  |
| H | 2.401867  | -1.789617 | -1.661535 |
| H | 4.313016  | 0.505180  | -1.380925 |
| H | 5.086884  | 0.344745  | 0.203846  |
| H | 4.239780  | 1.847883  | -0.212215 |
| H | 2.160963  | 0.085745  | 2.034646  |
| H | 2.188739  | 2.215787  | 0.920173  |

ωB97XD energy = -1103.92482136 a.u.

#### Bicyclomycin (6), Conf. C

|   |           |           |           |
|---|-----------|-----------|-----------|
| N | 1.837877  | -0.360192 | 1.419926  |
| C | 2.415984  | 0.450473  | 0.351486  |
| C | 1.332254  | 1.411699  | -0.179027 |
| N | 0.072482  | 0.945655  | -0.205664 |
| C | -0.341577 | -0.349086 | 0.298725  |
| C | 0.550005  | -0.734709 | 1.513966  |
| O | 0.097672  | -1.360365 | 2.464519  |

|   |           |           |           |
|---|-----------|-----------|-----------|
| O | 1.676416  | 2.528583  | -0.539167 |
| C | 2.954125  | -0.438876 | -0.777059 |
| O | 3.417685  | 1.216924  | 0.934623  |
| C | 1.964469  | -1.137189 | -1.682458 |
| C | 4.270103  | -0.564189 | -0.941800 |
| C | 0.903501  | -2.022699 | -1.014107 |
| O | -0.314623 | -1.363850 | -0.679776 |
| C | -1.804107 | -0.314712 | 0.800264  |
| C | -2.956119 | -0.196735 | -0.263758 |
| C | -2.629392 | 0.627616  | -1.514864 |
| O | -2.302729 | 1.972826  | -1.206526 |
| C | -3.405876 | -1.591310 | -0.695505 |
| O | -4.056925 | 0.448957  | 0.367328  |
| O | -1.941343 | 0.737539  | 1.742586  |
| H | -1.945624 | -1.272138 | 1.307861  |
| H | 2.462127  | -0.626906 | 2.171072  |
| H | -0.657721 | 1.593456  | -0.523646 |
| H | 3.331892  | 2.102337  | 0.541043  |
| H | 2.539588  | -1.774283 | -2.361130 |
| H | 1.442993  | -0.405917 | -2.312935 |
| H | 4.675271  | -1.206489 | -1.718146 |
| H | 4.966549  | -0.022277 | -0.312743 |
| H | 1.314106  | -2.538377 | -0.136776 |
| H | 0.580820  | -2.784935 | -1.725444 |
| H | -3.504331 | 0.595600  | -2.175252 |
| H | -1.775391 | 0.205552  | -2.049079 |
| H | -3.012563 | 2.318021  | -0.651475 |
| H | -2.591292 | -2.125727 | -1.189706 |
| H | -4.255569 | -1.510190 | -1.378805 |
| H | -3.728889 | -2.164605 | 0.177343  |
| H | -3.733001 | 0.813337  | 1.204040  |
| H | -1.610910 | 0.418678  | 2.590071  |

ωB97XD energy = -1103.92382803 a.u.

#### Bicyclomycin (6), Conf. D

|   |           |           |           |
|---|-----------|-----------|-----------|
| N | 1.527854  | -0.433839 | 1.424304  |
| C | 2.526371  | 0.190801  | 0.563331  |
| C | 1.924926  | 1.476482  | -0.021885 |
| N | 0.604613  | 1.448978  | -0.262598 |
| C | -0.304565 | 0.340560  | -0.012506 |
| C | 0.200294  | -0.454896 | 1.215391  |
| O | -0.559217 | -1.109787 | 1.922248  |
| O | 2.661045  | 2.428502  | -0.235940 |
| C | 2.937580  | -0.766403 | -0.565705 |
| O | 3.596105  | 0.537420  | 1.378253  |
| C | 1.977094  | -0.985143 | -1.714478 |
| C | 4.124794  | -1.368094 | -0.511111 |
| C | 0.569319  | -1.503572 | -1.379540 |
| O | -0.415383 | -0.503743 | -1.135248 |
| C | -1.711755 | 1.004610  | 0.212571  |
| C | -3.035233 | 0.182633  | 0.015244  |
| C | -3.209919 | -1.149708 | 0.761101  |
| O | -2.447596 | -2.211116 | 0.235146  |
| C | -4.192316 | 1.088406  | 0.449191  |
| O | -3.187256 | -0.040465 | -1.381732 |
| O | -1.797441 | 2.092516  | -0.692536 |

|   |           |           |           |
|---|-----------|-----------|-----------|
| H | -1.697271 | 1.426515  | 1.222761  |
| H | 1.881392  | -1.026666 | 2.165865  |
| H | 0.171935  | 2.257986  | -0.698647 |
| H | 3.900940  | 1.404231  | 1.061841  |
| H | 2.436148  | -1.718544 | -2.384093 |
| H | 1.866455  | -0.062933 | -2.298452 |
| H | 4.430431  | -2.069090 | -1.282020 |
| H | 4.819684  | -1.165979 | 0.295789  |
| H | 0.601457  | -2.221093 | -0.548411 |
| H | 0.172015  | -2.031048 | -2.247830 |
| H | -4.260043 | -1.430454 | 0.636072  |
| H | -3.011849 | -1.005160 | 1.828080  |
| H | -1.624975 | -2.217108 | 0.739490  |
| H | -4.185748 | 1.221601  | 1.535839  |
| H | -5.137719 | 0.624948  | 0.158603  |
| H | -4.127603 | 2.071112  | -0.019124 |
| H | -2.589893 | -0.770389 | -1.599342 |
| H | -2.214236 | 1.725436  | -1.489512 |

ωB97XD energy = -1103.92226264 a.u.

#### 1 $\alpha$ ,4 $\beta$ -dihydroxy-8 $\alpha$ -acetoxy-guaia-

2,10(14),11(13)-triene-6,12-olide (7), Conf. A

|   |           |           |           |
|---|-----------|-----------|-----------|
| C | 2.870531  | -2.097305 | -0.392665 |
| C | 3.747445  | -1.190699 | 0.026131  |
| C | 3.144454  | 0.184479  | 0.183125  |
| C | 1.743368  | 0.019217  | -0.489561 |
| C | 1.496632  | -1.521280 | -0.639420 |
| C | 0.619060  | 0.735327  | 0.226110  |
| C | -0.767162 | 0.633113  | -0.452820 |
| C | -1.589249 | -0.498415 | 0.163184  |
| C | -1.013176 | -1.897559 | -0.095765 |
| C | 0.432817  | -2.065306 | 0.315979  |
| C | 0.755463  | -2.622209 | 1.484707  |
| O | 0.933420  | 2.148603  | 0.287119  |
| C | -0.163148 | 2.906372  | 0.110273  |
| C | -1.306841 | 2.031260  | -0.273061 |
| C | 3.990460  | 1.272415  | -0.473528 |
| O | 3.048076  | 0.425369  | 1.589574  |
| C | -2.528846 | 2.536028  | -0.434159 |
| O | 1.036670  | -1.844900 | -1.954317 |
| H | 1.805081  | 0.429498  | -1.504232 |
| O | -0.137471 | 4.108549  | 0.240880  |
| O | -2.894854 | -0.447563 | -0.445435 |
| O | -3.859806 | -1.257500 | 1.422304  |
| C | -3.949762 | -0.854055 | 0.281332  |
| C | -5.225642 | -0.723003 | -0.495924 |
| H | 3.064045  | -3.153156 | -0.555205 |
| H | 4.788630  | -1.377565 | 0.271766  |
| H | 0.559712  | 0.394964  | 1.264347  |
| H | -0.635270 | 0.432566  | -1.523960 |
| H | -1.702316 | -0.326798 | 1.237690  |
| H | -1.627125 | -2.612395 | 0.458080  |
| H | -1.124526 | -2.109334 | -1.162380 |
| H | -0.017586 | -2.976380 | 2.161861  |
| H | 1.785411  | -2.730777 | 1.810554  |

|   |           |           |           |
|---|-----------|-----------|-----------|
| H | 3.502084  | 2.248452  | -0.384602 |
| H | 4.971212  | 1.325440  | 0.009503  |
| H | 4.138674  | 1.062031  | -1.537034 |
| H | 2.893416  | 1.368155  | 1.729827  |
| H | -2.698088 | 3.595199  | -0.260576 |
| H | -3.369174 | 1.925018  | -0.741052 |
| H | 1.729522  | -1.605682 | -2.581850 |
| H | -5.434846 | 0.336537  | -0.674330 |
| H | -6.047648 | -1.165404 | 0.065748  |
| H | -5.127911 | -1.211123 | -1.468788 |

ωB97XD energy = -1110.92647146 a.u.

1 $\alpha$ ,4 $\beta$ -dihydroxy-8 $\alpha$ -acetoxy-guaia-  
2,10(14),11(13)-triene-6,12-olide (7), Conf. B

|   |           |           |           |
|---|-----------|-----------|-----------|
| C | 2.126627  | -2.186932 | 0.802917  |
| C | 3.088125  | -1.356521 | 1.192203  |
| C | 3.110789  | -0.076818 | 0.394630  |
| C | 1.736400  | -0.121389 | -0.372395 |
| C | 1.350375  | -1.639049 | -0.383993 |
| C | 0.732970  | 0.846162  | 0.246358  |
| C | -0.708595 | 0.781620  | -0.285936 |
| C | -1.587595 | -0.127921 | 0.562263  |
| C | -0.896461 | -1.461324 | 0.881514  |
| C | -0.131201 | -1.998859 | -0.304622 |
| C | -0.728898 | -2.756109 | -1.226598 |
| O | 1.191988  | 2.187326  | -0.081717 |
| C | 0.162213  | 3.021029  | -0.323307 |
| C | -1.100468 | 2.233168  | -0.331853 |
| C | 4.293853  | -0.027115 | -0.572845 |
| O | 3.215693  | 0.985783  | 1.337444  |
| C | -2.298928 | 2.811650  | -0.345993 |
| O | 1.925093  | -2.143365 | -1.593923 |
| H | 1.858767  | 0.184582  | -1.416577 |
| O | 0.325894  | 4.205542  | -0.501435 |
| O | -2.773119 | -0.354523 | -0.226998 |
| O | -3.983578 | -0.784953 | 1.622064  |
| C | -3.904535 | -0.690533 | 0.414378  |
| C | -5.025786 | -0.924352 | -0.553271 |
| H | 1.939515  | -3.182205 | 1.195837  |
| H | 3.826688  | -1.546249 | 1.964970  |
| H | 0.744938  | 0.782255  | 1.338803  |
| H | -0.691571 | 0.383447  | -1.308841 |
| H | -1.878439 | 0.370694  | 1.490588  |
| H | -0.226471 | -1.302348 | 1.733296  |
| H | -1.654049 | -2.175315 | 1.213605  |
| H | -1.773316 | -3.035013 | -1.116519 |
| H | -0.211317 | -3.103316 | -2.114450 |
| H | 4.221347  | -0.829230 | -1.312084 |
| H | 4.300280  | 0.931210  | -1.104980 |
| H | 5.236601  | -0.126420 | -0.026153 |
| H | 3.211467  | 1.827443  | 0.864462  |
| H | -2.380696 | 3.894762  | -0.363996 |
| H | -3.216403 | 2.232344  | -0.338506 |
| H | 2.050608  | -3.095774 | -1.501848 |
| H | -4.745292 | -1.710453 | -1.259735 |
| H | -5.215148 | -0.013960 | -1.129238 |

H -5.926586 -1.213181 -0.012817  
ωB97XD energy = -1110.92216307 a.u.

Mexicanin (8), Conf. A

|   |           |           |           |
|---|-----------|-----------|-----------|
| C | -1.344907 | -0.591792 | 0.257996  |
| C | -1.623169 | 0.765630  | -0.454980 |
| C | -3.103108 | 0.689220  | -0.750899 |
| C | -3.605819 | -0.548157 | -0.630844 |
| C | -2.543736 | -1.449394 | -0.165971 |
| C | -0.017017 | -1.272471 | -0.176854 |
| C | 1.106140  | -0.264369 | -0.456713 |
| C | 1.247517  | 0.921546  | 0.517047  |
| C | 0.437333  | 2.155050  | 0.147261  |
| C | -1.097570 | 2.036056  | 0.247011  |
| C | 2.508874  | -0.803443 | -0.522688 |
| C | 3.403473  | 0.285037  | -0.043036 |
| O | 2.653276  | 1.285609  | 0.454776  |
| O | -2.575841 | -2.669687 | -0.094569 |
| C | -1.714449 | 3.310122  | -0.339660 |
| H | -1.148558 | 0.741279  | -1.449045 |
| O | 4.612056  | 0.346789  | -0.074448 |
| C | 2.971816  | -1.982685 | -0.927782 |
| C | -1.490905 | -0.488586 | 1.794859  |
| O | 0.422627  | -2.217815 | 0.778635  |
| H | -3.668823 | 1.545346  | -1.103665 |
| H | -4.612449 | -0.873084 | -0.865363 |
| H | -0.206443 | -1.790372 | -1.128141 |
| H | 0.894132  | 0.170477  | -1.442487 |
| H | 1.067433  | 0.614864  | 1.549926  |
| H | 0.760781  | 2.981643  | 0.788544  |
| H | 0.704080  | 2.425675  | -0.884038 |
| H | -1.373702 | 1.991791  | 1.305801  |
| H | -1.579551 | 3.351319  | -1.427466 |
| H | -2.784020 | 3.385938  | -0.124751 |
| H | -1.233937 | 4.195895  | 0.087789  |
| H | 4.040040  | -2.180819 | -0.922373 |
| H | 2.306795  | -2.773284 | -1.259324 |
| H | -1.554163 | -1.483718 | 2.239482  |
| H | -0.654771 | 0.025751  | 2.268328  |
| H | -2.409558 | 0.048772  | 2.048946  |
| H | -0.251070 | -2.907234 | 0.834191  |

ωB97XD energy = -883.121954139 a.u.

Neurolelin A (9), Conf. A

|   |           |           |           |
|---|-----------|-----------|-----------|
| C | 3.410665  | 0.384811  | -1.221947 |
| C | 3.357034  | -0.945297 | -1.365886 |
| C | 3.048787  | -1.954910 | -0.295675 |
| C | 1.614017  | -2.491749 | -0.467448 |
| C | 2.157051  | 2.220386  | 0.102213  |
| C | 3.179553  | 1.073200  | 0.069257  |
| C | 0.510129  | -1.438518 | -0.590229 |
| C | 0.345759  | -0.503417 | 0.631639  |
| C | -0.105120 | 0.932907  | 0.312542  |
| C | 0.813236  | 1.816079  | -0.533887 |

|   |           |           |           |
|---|-----------|-----------|-----------|
| O | 3.758623  | 0.773024  | 1.104181  |
| C | 4.051505  | -3.112726 | -0.337251 |
| C | 2.757823  | 3.408459  | -0.668143 |
| O | 1.944322  | 2.592997  | 1.447070  |
| H | 0.259240  | 2.742170  | -0.718452 |
| O | -0.743770 | -2.166857 | -0.688016 |
| C | -1.401433 | -2.164427 | 0.484510  |
| C | -0.723282 | -1.222219 | 1.415642  |
| C | -1.083921 | -1.073550 | 2.687330  |
| O | -2.385220 | -2.843590 | 0.674234  |
| O | -1.349533 | 0.807557  | -0.409882 |
| C | -2.320049 | 1.709168  | -0.178073 |
| C | -3.548867 | 1.415536  | -0.996017 |
| O | -2.196679 | 2.634020  | 0.598741  |
| C | -4.160283 | 0.031261  | -0.708215 |
| C | -4.504962 | -0.125205 | 0.773903  |
| C | -5.394420 | -0.179728 | -1.585454 |
| H | 3.519721  | 1.016681  | -2.099647 |
| H | 3.467219  | -1.348975 | -2.373410 |
| H | 3.129520  | -1.478937 | 0.683949  |
| H | 1.563022  | -3.124732 | -1.361629 |
| H | 1.385931  | -3.134837 | 0.391832  |
| H | 0.601056  | -0.884334 | -1.525725 |
| H | 1.271026  | -0.440712 | 1.208894  |
| H | -0.302855 | 1.436063  | 1.260967  |
| H | 0.992493  | 1.353642  | -1.509565 |
| H | 3.812279  | -3.851495 | 0.434198  |
| H | 5.069916  | -2.753611 | -0.161192 |
| H | 4.029298  | -3.619452 | -1.308806 |
| H | 2.840419  | 3.205645  | -1.739764 |
| H | 3.748739  | 3.656433  | -0.275663 |
| H | 2.103382  | 4.273110  | -0.528699 |
| H | 2.648459  | 2.174179  | 1.968225  |
| H | -0.577146 | -0.372740 | 3.344521  |
| H | -1.904134 | -1.656135 | 3.097277  |
| H | -4.276932 | 2.203458  | -0.782822 |
| H | -3.272272 | 1.482859  | -2.054741 |
| H | -3.416597 | -0.728116 | -0.974472 |
| H | -3.617142 | -0.045597 | 1.411217  |
| H | -5.218105 | 0.646249  | 1.090189  |
| H | -4.955728 | -1.104128 | 0.963099  |
| H | -5.153063 | -0.079387 | -2.649393 |
| H | -6.174303 | 0.553636  | -1.345563 |
| H | -5.814727 | -1.178513 | -1.428310 |

ωB97XD energy = -1230.08645640 a.u.

#### Neuroleulin A (9), Conf. B

|   |           |           |           |
|---|-----------|-----------|-----------|
| C | 3.533497  | 0.668840  | -1.080227 |
| C | 3.631119  | -0.656838 | -1.243447 |
| C | 3.350873  | -1.717357 | -0.215754 |
| C | 1.995889  | -2.393901 | -0.501383 |
| C | 1.994494  | 2.358804  | 0.131404  |
| C | 3.120061  | 1.312465  | 0.188155  |
| C | 0.803997  | -1.449992 | -0.677696 |
| C | 0.465356  | -0.565663 | 0.546949  |
| C | -0.112084 | 0.824059  | 0.220959  |

|   |           |           |           |
|---|-----------|-----------|-----------|
| C | 0.739002  | 1.811464  | -0.576494 |
| O | 3.623427  | 1.051147  | 1.272340  |
| C | 4.474490  | -2.758465 | -0.197217 |
| C | 2.513633  | 3.591504  | -0.626462 |
| O | 1.663564  | 2.729803  | 1.452494  |
| H | 0.092762  | 2.671652  | -0.782213 |
| O | -0.365196 | -2.287911 | -0.881874 |
| C | -1.119139 | -2.358609 | 0.228177  |
| C | -0.588946 | -1.397871 | 1.233468  |
| C | -1.052190 | -1.319514 | 2.477774  |
| O | -2.067105 | -3.106286 | 0.316110  |
| O | -1.307530 | 0.575873  | -0.551477 |
| C | -2.424753 | 1.257513  | -0.245292 |
| C | -3.594943 | 0.815901  | -1.084409 |
| O | -2.465011 | 2.126194  | 0.601562  |
| C | -4.872325 | 0.609029  | -0.255651 |
| C | -6.043116 | 0.281202  | -1.182979 |
| C | -4.677450 | -0.487744 | 0.794133  |
| H | 3.650988  | 1.323381  | -1.939983 |
| H | 3.865773  | -1.023825 | -2.243833 |
| H | 3.308350  | -1.256186 | 0.772883  |
| H | 2.070079  | -2.999470 | -1.412619 |
| H | 1.775694  | -3.083521 | 0.323000  |
| H | 0.906122  | -0.865443 | -1.593421 |
| H | 1.333683  | -0.426700 | 1.194809  |
| H | -0.400354 | 1.292855  | 1.163699  |
| H | 1.018979  | 1.387663  | -1.546129 |
| H | 4.584201  | -3.241206 | -1.175205 |
| H | 4.262606  | -3.537262 | 0.542209  |
| H | 5.430153  | -2.293435 | 0.062828  |
| H | 1.769471  | 4.387039  | -0.533470 |
| H | 2.667434  | 3.386606  | -1.689712 |
| H | 3.453637  | 3.944761  | -0.191515 |
| H | 2.340072  | 2.340227  | 2.030065  |
| H | -0.655300 | -0.601068 | 3.189299  |
| H | -1.847105 | -1.981495 | 2.809683  |
| H | -3.759225 | 1.601184  | -1.833116 |
| H | -3.331259 | -0.101851 | -1.619022 |
| H | -5.089604 | 1.551237  | 0.261447  |
| H | -6.196314 | 1.068518  | -1.929603 |
| H | -5.866809 | -0.660810 | -1.716666 |
| H | -6.972697 | 0.172587  | -0.614367 |
| H | -3.873999 | -0.239879 | 1.496530  |
| H | -4.426236 | -1.443535 | 0.319618  |
| H | -5.593092 | -0.631551 | 1.377522  |

ωB97XD energy = -1230.08563229 a.u.

#### Neuroleulin A (9), Conf. C

|   |          |           |           |
|---|----------|-----------|-----------|
| C | 2.975631 | 1.063332  | -1.392359 |
| C | 3.187496 | -0.217666 | -1.721179 |
| C | 3.283124 | -1.388315 | -0.782801 |
| C | 1.981769 | -2.213569 | -0.824657 |
| C | 1.593691 | 2.413382  | 0.333497  |
| C | 2.810287 | 1.532660  | 0.003188  |
| C | 0.686507 | -1.426912 | -0.616959 |
| C | 0.550585 | -0.713154 | 0.748609  |

|   |           |           |           |
|---|-----------|-----------|-----------|
| C | -0.247003 | 0.603503  | 0.720496  |
| C | 0.272604  | 1.764843  | -0.126185 |
| O | 3.589221  | 1.250478  | 0.903673  |
| C | 4.482141  | -2.271365 | -1.143951 |
| C | 1.774060  | 3.766882  | -0.373282 |
| O | 1.555940  | 2.617833  | 1.729428  |
| H | -0.496990 | 2.542923  | -0.074787 |
| O | -0.400998 | -2.389740 | -0.658051 |
| C | -0.871561 | -2.652478 | 0.572467  |
| C | -0.212027 | -1.740530 | 1.546903  |
| C | -0.355820 | -1.852343 | 2.864413  |
| O | -1.708362 | -3.504205 | 0.773728  |
| O | -1.546624 | 0.259472  | 0.194805  |
| C | -2.647568 | 0.673439  | 0.846296  |
| C | -3.896180 | 0.126520  | 0.206549  |
| O | -2.614228 | 1.382265  | 1.830839  |
| C | -3.987285 | 0.366624  | -1.310325 |
| C | -5.264788 | -0.271857 | -1.856498 |
| C | -3.934404 | 1.860436  | -1.638200 |
| H | 2.806189  | 1.796919  | -2.176383 |
| H | 3.218232  | -0.464109 | -2.783729 |
| H | 3.432430  | -1.022009 | 0.235176  |
| H | 1.901092  | -2.726352 | -1.790518 |
| H | 2.045436  | -2.991196 | -0.053295 |
| H | 0.506617  | -0.747510 | -1.451434 |
| H | 1.526017  | -0.512738 | 1.196623  |
| H | -0.366439 | 0.944232  | 1.750255  |
| H | 0.353907  | 1.470085  | -1.177412 |
| H | 5.417895  | -1.709237 | -1.069531 |
| H | 4.394523  | -2.658569 | -2.165609 |
| H | 4.545466  | -3.126331 | -0.463139 |
| H | 2.753602  | 4.196357  | -0.142624 |
| H | 1.003165  | 4.450823  | -0.008471 |
| H | 1.671262  | 3.678480  | -1.458422 |
| H | 2.388988  | 2.269265  | 2.086620  |
| H | 0.132679  | -1.165189 | 3.549245  |
| H | -0.974920 | -2.639260 | 3.286131  |
| H | -3.913461 | -0.951596 | 0.409417  |
| H | -4.750529 | 0.578993  | 0.718192  |
| H | -3.126733 | -0.123691 | -1.780023 |
| H | -5.290094 | -1.348256 | -1.655372 |
| H | -6.153865 | 0.178877  | -1.398371 |
| H | -5.339051 | -0.129225 | -2.939763 |
| H | -3.001525 | 2.321288  | -1.293749 |
| H | -4.766476 | 2.393274  | -1.161879 |
| H | -4.004563 | 2.024325  | -2.718661 |

ωB97XD energy = -1230.08543291 a.u.

#### Neuroleulin A (9), Conf. D

|   |          |           |           |
|---|----------|-----------|-----------|
| C | 2.986482 | 0.942549  | -1.420801 |
| C | 3.143969 | -0.352164 | -1.725633 |
| C | 3.201534 | -1.506784 | -0.764269 |
| C | 1.868777 | -2.281431 | -0.778880 |
| C | 1.674995 | 2.381693  | 0.285800  |
| C | 2.852060 | 1.445357  | -0.034037 |
| C | 0.609298 | -1.438488 | -0.572248 |

|   |           |           |           |
|---|-----------|-----------|-----------|
| C | 0.521955  | -0.691917 | 0.779794  |
| C | -0.226534 | 0.653045  | 0.735459  |
| C | 0.325666  | 1.773130  | -0.145878 |
| O | 3.625460  | 1.148509  | 0.866616  |
| C | 4.363378  | -2.442050 | -1.115856 |
| C | 1.899323  | 3.709490  | -0.455696 |
| O | 1.659558  | 2.621471  | 1.676625  |
| H | -0.413174 | 2.580806  | -0.107439 |
| O | -0.518691 | -2.354386 | -0.578521 |
| C | -0.983578 | -2.570496 | 0.663364  |
| C | -0.263614 | -1.675175 | 1.610214  |
| C | -0.368324 | -1.774027 | 2.932397  |
| O | -1.855978 | -3.377973 | 0.893339  |
| O | -1.546074 | 0.337133  | 0.243056  |
| C | -2.610518 | 0.934570  | 0.803893  |
| C | -3.901597 | 0.388705  | 0.253235  |
| O | -2.518758 | 1.783630  | 1.666638  |
| C | -3.945492 | 0.250579  | -1.277128 |
| C | -3.720074 | 1.601473  | -1.959414 |
| C | -5.279938 | -0.363862 | -1.701858 |
| H | 2.840749  | 1.667283  | -2.217698 |
| H | 3.155571  | -0.620566 | -2.783251 |
| H | 3.374076  | -1.126543 | 0.244779  |
| H | 1.757752  | -2.806935 | -1.734841 |
| H | 1.909385  | -3.047254 | 0.005473  |
| H | 0.447221  | -0.770026 | -1.419074 |
| H | 1.510551  | -0.519005 | 1.209089  |
| H | -0.316279 | 1.021947  | 1.759088  |
| H | 0.385170  | 1.447151  | -1.189192 |
| H | 5.319273  | -1.912333 | -1.063315 |
| H | 4.251720  | -2.850050 | -2.127033 |
| H | 4.402878  | -3.282047 | -0.414958 |
| H | 1.780422  | 3.598983  | -1.537138 |
| H | 2.896786  | 4.107120  | -0.245433 |
| H | 1.158312  | 4.429882  | -0.099374 |
| H | 2.479305  | 2.244032  | 2.035186  |
| H | 0.174249  | -1.107185 | 3.596276  |
| H | -1.006461 | -2.531492 | 3.378987  |
| H | -4.705876 | 1.041262  | 0.605619  |
| H | -4.043958 | -0.595813 | 0.717415  |
| H | -3.142085 | -0.431201 | -1.578041 |
| H | -2.745550 | 2.030965  | -1.700662 |
| H | -4.493124 | 2.321015  | -1.663159 |
| H | -3.756902 | 1.497468  | -3.048946 |
| H | -6.118405 | 0.284100  | -1.417848 |
| H | -5.316782 | -0.502026 | -2.787659 |
| H | -5.435569 | -1.341797 | -1.233630 |

ωB97XD energy = -1230.08543240 a.u.

#### Neuroleulin A (9), Conf. E

|   |          |           |           |
|---|----------|-----------|-----------|
| C | 3.043960 | 1.351240  | -1.245632 |
| C | 3.413764 | 0.112755  | -1.596980 |
| C | 3.558487 | -1.081894 | -0.695961 |
| C | 2.360965 | -2.036543 | -0.873195 |
| C | 1.391647 | 2.491517  | 0.385242  |
| C | 2.714984 | 1.746590  | 0.143217  |



|   |           |           |           |
|---|-----------|-----------|-----------|
| C | 0.977337  | -1.398891 | -0.733439 |
| C | 0.684495  | -0.745613 | 0.637447  |
| C | -0.250977 | 0.477052  | 0.596956  |
| C | 0.186335  | 1.715621  | -0.183720 |
| O | 3.435985  | 1.503967  | 1.101647  |
| C | 4.869497  | -1.818585 | -0.990685 |
| C | 1.478524  | 3.869477  | -0.290326 |
| O | 1.222252  | 2.664852  | 1.775697  |
| H | -0.666129 | 2.403138  | -0.165226 |
| O | 0.002470  | -2.468470 | -0.864353 |
| C | -0.504789 | -2.819519 | 0.329573  |
| C | 0.000629  | -1.875871 | 1.364143  |
| C | -0.190200 | -2.050610 | 2.668661  |
| O | -1.256658 | -3.759492 | 0.459359  |
| O | -1.474704 | 0.012271  | -0.014675 |
| C | -2.646083 | 0.278196  | 0.589260  |
| C | -3.802729 | -0.370288 | -0.123983 |
| O | -2.743581 | 0.959948  | 1.588896  |
| C | -4.852252 | 0.654727  | -0.588359 |
| C | -4.253237 | 1.644792  | -1.590056 |
| C | -6.058736 | -0.070483 | -1.184889 |
| H | 2.865859  | 2.095468  | -2.017354 |
| H | 3.556290  | -0.084783 | -2.660493 |
| H | 3.590832  | -0.749241 | 0.343859  |
| H | 2.408771  | -2.510158 | -1.860944 |
| H | 2.453393  | -2.838010 | -0.129622 |
| H | 0.778218  | -0.718451 | -1.562905 |
| H | 1.604807  | -0.452326 | 1.145991  |
| H | -0.464383 | 0.767174  | 1.627190  |
| H | 0.368708  | 1.467160  | -1.233989 |
| H | 5.730904  | -1.168687 | -0.809567 |
| H | 4.907666  | -2.156114 | -2.032810 |
| H | 4.966395  | -2.698545 | -0.346898 |
| H | 1.475027  | 3.790813  | -1.381160 |
| H | 2.382092  | 4.398722  | 0.026996  |
| H | 0.608122  | 4.456626  | 0.015091  |
| H | 2.048131  | 2.377769  | 2.198095  |
| H | 0.186920  | -1.338820 | 3.397455  |
| H | -0.734498 | -2.916558 | 3.034907  |
| H | -3.431485 | -0.950253 | -0.973870 |
| H | -4.256726 | -1.068112 | 0.588811  |
| H | -5.183954 | 1.213267  | 0.295363  |
| H | -3.421305 | 2.210030  | -1.155034 |
| H | -3.878259 | 1.121379  | -2.478251 |
| H | -5.005948 | 2.369127  | -1.918367 |
| H | -5.769816 | -0.647192 | -2.072240 |
| H | -6.831112 | 0.644416  | -1.487321 |
| H | -6.504344 | -0.764465 | -0.463922 |

ωB97XD energy = -1230.08490772 a.u.

#### Neuroleulin A (9), Conf. F

|   |          |           |           |
|---|----------|-----------|-----------|
| C | 3.345474 | 1.100247  | -1.189997 |
| C | 3.642165 | -0.186932 | -1.412626 |
| C | 3.588265 | -1.311466 | -0.417023 |
| C | 2.336251 | -2.177169 | -0.658337 |
| C | 1.648109 | 2.490203  | 0.186189  |

|   |           |           |           |
|---|-----------|-----------|-----------|
| C | 2.920121  | 1.627534  | 0.127215  |
| C | 1.006550  | -1.422587 | -0.705574 |
| C | 0.639537  | -0.652405 | 0.584380  |
| C | -0.176276 | 0.637571  | 0.371989  |
| C | 0.439335  | 1.770846  | -0.447895 |
| O | 3.524206  | 1.403367  | 1.167614  |
| C | 4.851709  | -2.173847 | -0.501063 |
| C | 1.916694  | 3.806444  | -0.560916 |
| O | 1.365721  | 2.777189  | 1.539141  |
| H | -0.350286 | 2.521190  | -0.564619 |
| O | -0.037899 | -2.420605 | -0.867863 |
| C | -0.675983 | -2.652376 | 0.291436  |
| C | -0.203852 | -1.671715 | 1.306562  |
| C | -0.550353 | -1.729460 | 2.589245  |
| O | -1.500699 | -3.531038 | 0.410342  |
| O | -1.384082 | 0.243677  | -0.315821 |
| C | -2.573685 | 0.472914  | 0.273715  |
| C | -3.686937 | -0.207528 | -0.478923 |
| O | -2.701214 | 1.107919  | 1.298845  |
| C | -5.059738 | 0.448154  | -0.302145 |
| C | -5.105018 | 1.823347  | -0.972115 |
| C | -6.149792 | -0.468781 | -0.859938 |
| H | 3.308353  | 1.792407  | -2.027011 |
| H | 3.869767  | -0.478436 | -2.439071 |
| H | 3.537157  | -0.894076 | 0.590612  |
| H | 2.441460  | -2.721612 | -1.604335 |
| H | 2.281717  | -2.928179 | 0.139693  |
| H | 0.947936  | -0.790568 | -1.593148 |
| H | 1.528739  | -0.398668 | 1.165887  |
| H | -0.446227 | 1.025555  | 1.355365  |
| H | 0.699014  | 1.427224  | -1.454558 |
| H | 5.746086  | -1.578097 | -0.295075 |
| H | 4.960347  | -2.622701 | -1.495147 |
| H | 4.808002  | -2.983846 | 0.233946  |
| H | 2.016711  | 3.654186  | -1.639017 |
| H | 2.825489  | 4.283907  | -0.182639 |
| H | 1.073982  | 4.479952  | -0.383136 |
| H | 2.120768  | 2.455342  | 2.058156  |
| H | -0.199266 | -0.993489 | 3.306609  |
| H | -1.203020 | -2.520721 | 2.947494  |
| H | -3.416009 | -0.275854 | -1.537889 |
| H | -3.705752 | -1.237830 | -0.097807 |
| H | -5.232835 | 0.580733  | 0.772231  |
| H | -4.345120 | 2.498913  | -0.564807 |
| H | -4.935676 | 1.731971  | -2.052491 |
| H | -6.081541 | 2.297245  | -0.825554 |
| H | -5.998176 | -0.651272 | -1.931051 |
| H | -7.139441 | -0.016672 | -0.734918 |
| H | -6.155916 | -1.438647 | -0.350850 |

ωB97XD energy = -1230.08482561 a.u.

#### Neuroleulin A (9), Conf. G

|   |           |           |           |
|---|-----------|-----------|-----------|
| C | -2.680735 | -1.582218 | -1.223051 |
| C | -3.137302 | -0.395745 | -1.644954 |
| C | -3.454522 | 0.806786  | -0.799822 |
| C | -2.341765 | 1.866296  | -0.932812 |

|   |           |           |           |
|---|-----------|-----------|-----------|
| C | -1.043271 | -2.496827 | 0.560761  |
| C | -2.412018 | -1.896849 | 0.198812  |
| C | -0.914535 | 1.369818  | -0.692747 |
| C | -0.639246 | 0.788182  | 0.714550  |
| C | 0.410157  | -0.337462 | 0.757827  |
| C | 0.115093  | -1.639890 | 0.013452  |
| O | -3.219002 | -1.696648 | 1.096395  |
| C | -4.805652 | 1.404512  | -1.206857 |
| C | -0.957032 | -3.911484 | -0.034313 |
| O | -0.949351 | -2.576344 | 1.966717  |
| H | 1.023613  | -2.246742 | 0.089839  |
| O | -0.040732 | 2.525050  | -0.808013 |
| C | 0.365363  | 2.956267  | 0.398074  |
| C | -0.109206 | 2.000581  | 1.436066  |
| C | -0.022795 | 2.236174  | 2.742178  |
| O | 1.016349  | 3.967773  | 0.535630  |
| O | 1.597814  | 0.228904  | 0.166409  |
| C | 2.799470  | -0.093777 | 0.674805  |
| C | 3.913038  | 0.585780  | -0.076589 |
| O | 2.942321  | -0.851856 | 1.612633  |
| C | 4.375460  | -0.199157 | -1.328327 |
| C | 4.937744  | -1.575707 | -0.968714 |
| C | 3.281570  | -0.312047 | -2.393161 |
| H | -2.379386 | -2.329101 | -1.952447 |
| H | -3.224731 | -0.245543 | -2.722015 |
| H | -3.526854 | 0.504538  | 0.247093  |
| H | -2.371476 | 2.309605  | -1.935265 |
| H | -2.554311 | 2.673615  | -0.220822 |
| H | -0.601833 | 0.687814  | -1.485009 |
| H | -1.553071 | 0.421187  | 1.186015  |
| H | 0.613418  | -0.566020 | 1.806211  |
| H | -0.046473 | -1.444486 | -1.051456 |
| H | -5.612068 | 0.680023  | -1.057987 |
| H | -4.804238 | 1.702463  | -2.261730 |
| H | -5.030234 | 2.291253  | -0.605394 |
| H | -0.881980 | -3.893750 | -1.125477 |
| H | -1.828778 | -4.507178 | 0.253653  |
| H | -0.061025 | -4.394105 | 0.364874  |
| H | -1.831289 | -2.369827 | 2.317724  |
| H | -0.380919 | 1.516490  | 3.472814  |
| H | 0.414365  | 3.160759  | 3.108657  |
| H | 3.577660  | 1.582807  | -0.376697 |
| H | 4.751944  | 0.689041  | 0.616037  |
| H | 5.192772  | 0.398751  | -1.749889 |
| H | 5.719608  | -1.504069 | -0.205292 |
| H | 4.156653  | -2.240543 | -0.581779 |
| H | 5.370985  | -2.053698 | -1.853815 |
| H | 2.463893  | -0.959838 | -2.057767 |
| H | 3.691733  | -0.743959 | -3.312360 |
| H | 2.853944  | 0.666088  | -2.636939 |

ωB97XD energy = -1230.08412676 a.u.

Neuroleulin A (9), Conf. H

|   |          |           |           |
|---|----------|-----------|-----------|
| C | 3.440184 | 0.932238  | -0.977305 |
| C | 3.679964 | -0.374513 | -1.144653 |
| C | 3.469019 | -1.465679 | -0.132152 |

|   |           |           |           |
|---|-----------|-----------|-----------|
| C | 2.197610  | -2.267618 | -0.473547 |
| C | 1.693596  | 2.429858  | 0.209730  |
| C | 2.924016  | 1.510619  | 0.284912  |
| C | 0.923555  | -1.448647 | -0.694939 |
| C | 0.435648  | -0.625764 | 0.521562  |
| C | -0.265142 | 0.702981  | 0.183355  |
| C | 0.530303  | 1.775733  | -0.562570 |
| O | 3.424569  | 1.290028  | 1.379305  |
| C | 4.684126  | -2.397930 | -0.082986 |
| C | 2.113036  | 3.728737  | -0.498242 |
| O | 1.277380  | 2.727025  | 1.525373  |
| H | -0.180431 | 2.573747  | -0.797566 |
| O | -0.139194 | -2.402200 | -0.963656 |
| C | -0.921224 | -2.579574 | 0.114545  |
| C | -0.546689 | -1.580796 | 1.151895  |
| C | -1.063281 | -1.577491 | 2.377382  |
| O | -1.777134 | -3.434989 | 0.155639  |
| O | -1.397369 | 0.344449  | -0.640237 |
| C | -2.506536 | 1.101893  | -0.562269 |
| C | -3.624145 | 0.544468  | -1.405016 |
| O | -2.574333 | 2.103011  | 0.122065  |
| C | -4.826661 | 0.053742  | -0.564466 |
| C | -4.393046 | -0.964941 | 0.492182  |
| C | -5.622022 | 1.200067  | 0.062724  |
| H | 3.515500  | 1.605961  | -1.826906 |
| H | 3.984479  | -0.708099 | -2.137943 |
| H | 3.348371  | -1.019999 | 0.857413  |
| H | 2.367556  | -2.853779 | -1.384665 |
| H | 2.016746  | -2.984514 | 0.337077  |
| H | 1.006491  | -0.841253 | -1.597619 |
| H | 1.255886  | -0.402405 | 1.207427  |
| H | -0.640820 | 1.128147  | 1.116786  |
| H | 0.896529  | 1.385434  | -1.517352 |
| H | 4.861205  | -2.866702 | -1.057837 |
| H | 4.526467  | -3.194529 | 0.651259  |
| H | 5.586706  | -1.848888 | 0.201897  |
| H | 1.292224  | 4.446252  | -0.415303 |
| H | 2.323687  | 3.567087  | -1.559226 |
| H | 2.998838  | 4.159789  | -0.021612 |
| H | 1.981418  | 2.415540  | 2.117423  |
| H | -0.775360 | -0.832884 | 3.113774  |
| H | -1.793803 | -2.327121 | 2.668025  |
| H | -3.952460 | 1.339303  | -2.083253 |
| H | -3.234361 | -0.281321 | -2.004793 |
| H | -5.483012 | -0.458593 | -1.278803 |
| H | -3.825111 | -1.790540 | 0.052141  |
| H | -3.765621 | -0.495658 | 1.260420  |
| H | -5.266670 | -1.389340 | 0.998067  |
| H | -5.947382 | 1.921415  | -0.695036 |
| H | -5.026798 | 1.740271  | 0.805272  |
| H | -6.515480 | 0.809801  | 0.562170  |

ωB97XD energy = -1230.08384465 a.u.

Neuroleulin A (9), Conf. I

|   |          |          |           |
|---|----------|----------|-----------|
| C | 2.880363 | 1.557796 | -1.134895 |
| C | 3.364969 | 0.363955 | -1.501469 |

|   |           |           |           |
|---|-----------|-----------|-----------|
| C | 3.588057  | -0.832184 | -0.618299 |
| C | 2.479238  | -1.879121 | -0.845493 |
| C | 1.103721  | 2.514823  | 0.483791  |
| C | 2.490129  | 1.891316  | 0.254704  |
| C | 1.044328  | -1.359086 | -0.741454 |
| C | 0.649214  | -0.769891 | 0.633481  |
| C | -0.383185 | 0.372285  | 0.582330  |
| C | -0.017107 | 1.664974  | -0.146397 |
| O | 3.211291  | 1.692898  | 1.222954  |
| C | 4.964701  | -1.450360 | -0.882677 |
| C | 1.096852  | 3.918783  | -0.141300 |
| O | 0.884986  | 2.624120  | 1.874064  |
| H | -0.923351 | 2.280977  | -0.141423 |
| O | 0.166848  | -2.500955 | -0.935770 |
| C | -0.349915 | -2.926780 | 0.229074  |
| C | 0.034022  | -1.971847 | 1.304392  |
| C | -0.197525 | -2.193397 | 2.595134  |
| O | -1.021633 | -3.931110 | 0.307467  |
| O | -1.534858 | -0.164445 | -0.101888 |
| C | -2.741557 | -0.103585 | 0.492102  |
| C | -3.803009 | -0.745104 | -0.361956 |
| O | -2.929084 | 0.419639  | 1.571293  |
| C | -4.618259 | 0.278832  | -1.187689 |
| C | -5.484334 | 1.179789  | -0.305581 |
| C | -3.727273 | 1.106119  | -2.117099 |
| H | 2.652356  | 2.299207  | -1.896138 |
| H | 3.547049  | 0.200998  | -2.564776 |
| H | 3.559099  | -0.518772 | 0.427365  |
| H | 2.595245  | -2.332826 | -1.837152 |
| H | 2.612888  | -2.681559 | -0.109077 |
| H | 0.817018  | -0.675098 | -1.560545 |
| H | 1.521893  | -0.416576 | 1.186817  |
| H | -0.665932 | 0.611852  | 1.608954  |
| H | 0.219043  | 1.462155  | -1.196002 |
| H | 5.064622  | -1.760874 | -1.929111 |
| H | 5.115169  | -2.332566 | -0.252378 |
| H | 5.761784  | -0.734305 | -0.661033 |
| H | 0.171401  | 4.421044  | 0.152794  |
| H | 1.137393  | 3.881393  | -1.233480 |
| H | 1.942381  | 4.508038  | 0.226317  |
| H | 1.726618  | 2.409774  | 2.308389  |
| H | 0.088279  | -1.471669 | 3.354711  |
| H | -0.685790 | -3.108493 | 2.918231  |
| H | -3.326892 | -1.462099 | -1.035562 |
| H | -4.475298 | -1.288460 | 0.307783  |
| H | -5.286828 | -0.327070 | -1.811596 |
| H | -6.136644 | 0.588995  | 0.346242  |
| H | -4.869980 | 1.824063  | 0.332732  |
| H | -6.117320 | 1.824119  | -0.925399 |
| H | -3.100746 | 0.467893  | -2.749297 |
| H | -3.065142 | 1.768079  | -1.545903 |
| H | -4.339290 | 1.736709  | -2.770610 |

ωB97XD energy = -1230.08381885 a.u.

Swinhoeisterol F (**10**), Conf. A

|   |           |           |           |
|---|-----------|-----------|-----------|
| C | 4.483940  | -2.885889 | 0.194225  |
| C | 4.916839  | -2.168420 | -1.085830 |
| C | 4.734499  | -0.665756 | -0.938064 |
| C | 3.324427  | -0.257671 | -0.538980 |
| C | 2.821969  | -0.998277 | 0.739821  |
| C | 3.049705  | -2.515484 | 0.560278  |
| C | 3.129515  | 1.266207  | -0.460793 |
| C | 1.870283  | 1.694755  | 0.334593  |
| C | 0.793440  | 0.626953  | 0.345129  |
| C | 1.293101  | -0.758995 | 0.799205  |
| C | -0.511751 | 0.951740  | 1.113357  |
| C | -0.839047 | -0.381489 | 1.830981  |
| C | 0.545431  | -0.982835 | 2.119993  |
| C | 1.431235  | 3.074746  | -0.142673 |
| C | 0.308416  | 3.221429  | -1.147709 |
| C | -1.076620 | 2.688776  | -0.733560 |
| C | -1.090354 | 1.201239  | -0.323946 |
| C | 3.573325  | -0.525769 | 1.994548  |
| C | -0.538106 | 2.085622  | 2.131128  |
| C | 5.740100  | 0.180157  | -1.177395 |
| O | 6.221418  | -2.554388 | -1.481266 |
| O | 2.047929  | 4.056607  | 0.245482  |
| C | -2.381124 | 0.481984  | -0.723159 |
| C | -3.570795 | 1.017418  | 0.086357  |
| C | -2.628483 | 0.511203  | -2.235432 |
| C | -4.903029 | 0.300292  | -0.172015 |
| C | -4.907555 | -1.206445 | 0.134612  |
| C | -4.726601 | -1.465755 | 1.633734  |
| C | -6.158331 | -1.930933 | -0.422584 |
| C | -7.482181 | -1.310098 | 0.034735  |
| C | -6.121530 | -2.048470 | -1.949619 |
| H | 2.672394  | -0.624849 | -1.347726 |
| H | 2.163013  | 1.845343  | 1.378291  |
| H | 0.851284  | -1.445648 | 0.066467  |
| O | 0.069740  | 0.546364  | -0.910517 |
| H | 5.177974  | -2.622004 | 1.003375  |
| H | 4.567114  | -3.966221 | 0.036930  |
| H | 4.265406  | -2.504186 | -1.903729 |
| H | 2.749063  | -3.038378 | 1.475596  |
| H | 2.389377  | -2.876912 | -0.239216 |
| H | 3.086531  | 1.662761  | -1.481165 |
| H | 3.986370  | 1.742137  | 0.022437  |
| H | -1.430649 | -0.218636 | 2.737068  |
| H | -1.400201 | -1.071687 | 1.195395  |
| H | 0.496387  | -2.037355 | 2.408169  |
| H | 1.030359  | -0.437687 | 2.939321  |
| H | 0.623364  | 2.685164  | -2.050050 |
| H | 0.230788  | 4.284354  | -1.389959 |
| H | -1.728467 | 2.836588  | -1.598225 |
| H | -1.495551 | 3.302854  | 0.069196  |
| H | 3.332981  | -1.164269 | 2.851266  |
| H | 3.335120  | 0.502280  | 2.276242  |
| H | 4.656171  | -0.570628 | 1.841910  |
| H | -0.117225 | 3.027788  | 1.773798  |
| H | 0.025097  | 1.802475  | 3.027074  |
| H | -1.570268 | 2.285127  | 2.439716  |

|   |           |           |           |
|---|-----------|-----------|-----------|
| H | 5.636243  | 1.255407  | -1.082905 |
| H | 6.706827  | -0.186318 | -1.509015 |
| H | 6.824740  | -2.387883 | -0.746485 |
| H | -2.225164 | -0.567976 | -0.459245 |
| H | -3.709527 | 2.082354  | -0.142613 |
| H | -3.326506 | 0.964371  | 1.154966  |
| H | -3.351741 | -0.259497 | -2.519682 |
| H | -1.702363 | 0.312745  | -2.784439 |
| H | -3.029357 | 1.472988  | -2.574787 |
| H | -5.194725 | 0.465505  | -1.215583 |
| H | -5.673911 | 0.787148  | 0.439034  |
| H | -4.049525 | -1.663477 | -0.378211 |
| H | -4.745343 | -2.539552 | 1.851907  |
| H | -3.770781 | -1.074875 | 1.996955  |
| H | -5.519892 | -0.988504 | 2.221489  |
| H | -6.119707 | -2.953845 | -0.021691 |
| H | -8.325593 | -1.940854 | -0.267373 |
| H | -7.529919 | -1.196062 | 1.122824  |
| H | -7.636447 | -0.322181 | -0.414463 |
| H | -6.960457 | -2.653458 | -2.311800 |
| H | -5.195666 | -2.525857 | -2.290304 |
| H | -6.194615 | -1.068651 | -2.435982 |

ωB97XD energy = -1358.21103127 a.u.

Swinhoeisterol F (**10**), Conf. B

|   |           |           |           |
|---|-----------|-----------|-----------|
| C | 4.451903  | -2.949667 | 0.152609  |
| C | 4.904159  | -2.186453 | -1.088023 |
| C | 4.777999  | -0.692265 | -0.844880 |
| C | 3.359235  | -0.268849 | -0.504972 |
| C | 2.802709  | -1.050546 | 0.728777  |
| C | 3.016683  | -2.565747 | 0.506525  |
| C | 3.184665  | 1.253033  | -0.373092 |
| C | 1.905311  | 1.670248  | 0.395954  |
| C | 0.810839  | 0.621478  | 0.328075  |
| C | 1.276421  | -0.788915 | 0.743487  |
| C | -0.513317 | 0.938059  | 1.067454  |
| C | -0.885097 | -0.421554 | 1.709017  |
| C | 0.479125  | -1.052338 | 2.027508  |
| C | 1.509022  | 3.076568  | -0.037147 |
| C | 0.430106  | 3.279798  | -1.077870 |
| C | -0.977464 | 2.763678  | -0.725684 |
| C | -1.040539 | 1.261175  | -0.374886 |
| C | 3.519222  | -0.635477 | 2.023650  |
| C | -0.556379 | 2.024009  | 2.135628  |
| C | 5.834997  | 0.120201  | -0.920542 |
| O | 6.213832  | -2.617161 | -1.413282 |
| O | 2.122312  | 4.030945  | 0.418691  |
| C | -2.342033 | 0.601218  | -0.842042 |
| C | -3.540804 | 1.177342  | -0.073476 |
| C | -2.520839 | 0.672037  | -2.362787 |
| C | -4.896149 | 0.542112  | -0.411205 |
| C | -5.000068 | -0.973734 | -0.177910 |
| C | -4.738252 | -1.329489 | 1.289517  |
| C | -6.343202 | -1.532895 | -0.710611 |
| C | -6.297031 | -3.053836 | -0.887622 |
| C | -7.554146 | -1.137629 | 0.141168  |

|   |           |           |           |
|---|-----------|-----------|-----------|
| H | 2.734079  | -0.596029 | -1.350909 |
| H | 2.163387  | 1.772109  | 1.454414  |
| H | 0.851598  | -1.440171 | -0.030531 |
| O | 0.121599  | 0.599846  | -0.950387 |
| H | 5.143227  | -2.729677 | 0.974476  |
| H | 4.514701  | -4.024339 | -0.047147 |
| H | 4.219516  | -2.446790 | -1.912378 |
| H | 2.694314  | -3.109891 | 1.401756  |
| H | 2.363748  | -2.895775 | -0.312479 |
| H | 3.183644  | 1.690088  | -1.377826 |
| H | 4.030157  | 1.696647  | 0.157978  |
| H | -1.517109 | -0.295564 | 2.593281  |
| H | -1.420148 | -1.075909 | 1.015799  |
| H | 0.406426  | -2.116154 | 2.272919  |
| H | 0.940237  | -0.545020 | 2.883981  |
| H | 0.765935  | 2.765776  | -1.985587 |
| H | 0.381088  | 4.351210  | -1.288483 |
| H | -1.598626 | 2.960286  | -1.603294 |
| H | -1.405808 | 3.357373  | 0.087355  |
| H | 3.229080  | -1.291994 | 2.850535  |
| H | 3.301049  | 0.390834  | 2.327332  |
| H | 4.604838  | -0.710533 | 1.908523  |
| H | -0.103366 | 2.972293  | 1.838768  |
| H | -0.034548 | 1.687482  | 3.037909  |
| H | -1.595876 | 2.230681  | 2.413336  |
| H | 5.766739  | 1.189368  | -0.752117 |
| H | 6.822287  | -0.271942 | -1.145775 |
| H | 6.464327  | -2.234283 | -2.261974 |
| H | -2.246931 | -0.459913 | -0.593086 |
| H | -3.615070 | 2.253230  | -0.278921 |
| H | -3.349870 | 1.084679  | 1.003227  |
| H | -3.257847 | -0.065112 | -2.696327 |
| H | -1.579215 | 0.451584  | -2.875757 |
| H | -2.871626 | 1.654826  | -2.696956 |
| H | -5.138851 | 0.753621  | -1.460660 |
| H | -5.662790 | 1.051485  | 0.186876  |
| H | -4.216656 | -1.456328 | -0.779898 |
| H | -5.385201 | -0.750927 | 1.959479  |
| H | -4.910496 | -2.392073 | 1.488896  |
| H | -3.702491 | -1.114257 | 1.567828  |
| H | -6.483853 | -1.094503 | -1.709256 |
| H | -7.218326 | -3.420334 | -1.353931 |
| H | -5.457408 | -3.356248 | -1.523973 |
| H | -6.191665 | -3.568773 | 0.074510  |
| H | -8.482857 | -1.463618 | -0.340125 |
| H | -7.623200 | -0.054952 | 0.289227  |
| H | -7.514935 | -1.610889 | 1.129085  |

ωB97XD energy = -1358.21102367 a.u.

Swinhoeisterol F (**10**), Conf. C

|   |           |           |           |
|---|-----------|-----------|-----------|
| C | -4.999388 | -2.502771 | 0.165238  |
| C | -5.469560 | -1.378905 | 1.082566  |
| C | -5.041443 | -0.036850 | 0.513317  |
| C | -3.537455 | 0.077278  | 0.329188  |
| C | -2.973886 | -1.079163 | -0.558209 |
| C | -3.484041 | -2.430813 | -0.008228 |

|   |           |           |           |
|---|-----------|-----------|-----------|
| C | -3.078724 | 1.467026  | -0.142562 |
| C | -1.654571 | 1.477401  | -0.753782 |
| C | -0.787758 | 0.344577  | -0.238103 |
| C | -1.436843 | -1.047222 | -0.373253 |
| C | 0.659193  | 0.262882  | -0.784319 |
| C | 0.865641  | -1.255349 | -1.010626 |
| C | -0.537186 | -1.751126 | -1.398128 |
| C | -1.066238 | 2.877044  | -0.618990 |
| C | -0.108386 | 3.205113  | 0.506722  |
| C | 1.210760  | 2.412236  | 0.565858  |
| C | 1.034128  | 0.880341  | 0.609249  |
| C | -3.427370 | -0.934733 | -2.019962 |
| C | 1.037589  | 1.011567  | -2.056968 |
| C | -5.933658 | 0.909848  | 0.212063  |
| O | -6.867638 | -1.516912 | 1.264313  |
| O | -1.436209 | 3.749831  | -1.391293 |
| C | 2.112273  | 0.184398  | 1.444217  |
| C | 3.480483  | 0.328525  | 0.763746  |
| C | 2.109350  | 0.642755  | 2.907336  |
| C | 4.555197  | -0.590357 | 1.343126  |
| C | 5.950189  | -0.441091 | 0.712149  |
| C | 6.930538  | -1.392751 | 1.406994  |
| C | 5.947611  | -0.585066 | -0.830512 |
| C | 7.344364  | -0.384757 | -1.428096 |
| C | 5.340388  | -1.902625 | -1.323060 |
| H | -3.094831 | -0.089680 | 1.323923  |
| H | -1.751790 | 1.321493  | -1.832425 |
| H | -1.240068 | -1.520145 | 0.597011  |
| O | -0.298208 | 0.577325  | 1.109106  |
| H | -5.519012 | -2.417856 | -0.796318 |
| H | -5.281646 | -3.464131 | 0.606586  |
| H | -4.962677 | -1.503654 | 2.053921  |
| H | -3.143283 | -3.239006 | -0.665519 |
| H | -3.020639 | -2.607052 | 0.971799  |
| H | -3.134314 | 2.157750  | 0.706215  |
| H | -3.753370 | 1.858342  | -0.907741 |
| H | 1.617367  | -1.451482 | -1.781324 |
| H | 1.185539  | -1.773190 | -0.102667 |
| H | -0.627740 | -2.841150 | -1.365302 |
| H | -0.782205 | -1.428996 | -2.417987 |
| H | -0.652837 | 3.028214  | 1.441456  |
| H | 0.111827  | 4.273348  | 0.437696  |
| H | 1.722584  | 2.747282  | 1.471603  |
| H | 1.861498  | 2.690435  | -0.268739 |
| H | -3.182195 | -1.837684 | -2.589164 |
| H | -2.962652 | -0.089128 | -2.532534 |
| H | -4.510232 | -0.789125 | -2.081709 |
| H | 0.748766  | 2.064729  | -2.069460 |
| H | 0.566774  | 0.539327  | -2.926133 |
| H | 2.122233  | 0.969258  | -2.207372 |
| H | -5.650335 | 1.875525  | -0.192090 |
| H | -6.996378 | 0.739281  | 0.355844  |
| H | -7.155014 | -0.897024 | 1.944499  |
| H | 1.854614  | -0.880257 | 1.452856  |
| H | 3.817707  | 1.372786  | 0.830776  |
| H | 3.353447  | 0.110218  | -0.303076 |

|   |          |           |           |
|---|----------|-----------|-----------|
| H | 2.647239 | -0.071815 | 3.537250  |
| H | 1.086441 | 0.712414  | 3.291430  |
| H | 2.591126 | 1.618119  | 3.037771  |
| H | 4.221590 | -1.634006 | 1.253129  |
| H | 4.656649 | -0.396929 | 2.418123  |
| H | 6.289759 | 0.585139  | 0.920112  |
| H | 7.964779 | -1.218821 | 1.095267  |
| H | 6.890640 | -1.252810 | 2.493052  |
| H | 6.689353 | -2.442595 | 1.203175  |
| H | 5.321391 | 0.228272  | -1.220140 |
| H | 7.286464 | -0.285459 | -2.517748 |
| H | 7.821349 | 0.520699  | -1.034927 |
| H | 8.003543 | -1.232935 | -1.211152 |
| H | 5.352676 | -1.942311 | -2.418098 |
| H | 4.300110 | -2.023395 | -1.002669 |
| H | 5.905012 | -2.768431 | -0.958043 |

ωB97XD energy = -1358.21099966 a.u.

#### Swinhoeisterol F (**10**), Conf. D

|   |           |           |           |
|---|-----------|-----------|-----------|
| C | -5.225703 | -2.250695 | 0.301944  |
| C | -5.613658 | -1.067590 | 1.190577  |
| C | -5.065836 | 0.229484  | 0.615332  |
| C | -3.564243 | 0.205261  | 0.372733  |
| C | -3.117962 | -1.012072 | -0.495621 |
| C | -3.713180 | -2.302355 | 0.109481  |
| C | -3.009356 | 1.542628  | -0.146308 |
| C | -1.607820 | 1.427104  | -0.798263 |
| C | -0.814865 | 0.240342  | -0.284147 |
| C | -1.578413 | -1.097580 | -0.354758 |
| C | 0.597927  | 0.027910  | -0.882063 |
| C | 0.676798  | -1.508297 | -1.064458 |
| C | -0.773728 | -1.902914 | -1.384505 |
| C | -0.911319 | 2.781198  | -0.712908 |
| C | 0.115812  | 3.052752  | 0.365536  |
| C | 1.371730  | 2.161877  | 0.379688  |
| C | 1.077401  | 0.650586  | 0.475599  |
| C | -3.599160 | -0.873069 | -1.949342 |
| C | 0.985328  | 0.706729  | -2.190265 |
| C | -5.864555 | 1.275092  | 0.385698  |
| O | -7.007633 | -1.042900 | 1.443034  |
| O | -1.247231 | 3.666399  | -1.486530 |
| C | 2.128118  | -0.112104 | 1.286676  |
| C | 3.460953  | -0.154858 | 0.528074  |
| C | 2.269954  | 0.412044  | 2.720176  |
| C | 4.485609  | -1.102473 | 1.155419  |
| C | 5.722796  | -1.393712 | 0.283605  |
| C | 5.335148  | -2.223249 | -0.949098 |
| C | 6.515156  | -0.122634 | -0.101065 |
| C | 6.878418  | 0.724268  | 1.123370  |
| C | 7.787790  | -0.462167 | -0.885352 |
| H | -3.107882 | 0.027360  | 1.359678  |
| H | -1.749978 | 1.257472  | -1.870011 |
| H | -1.389783 | -1.556790 | 0.623599  |
| O | -0.253237 | 0.467044  | 1.036030  |
| H | -5.741226 | -2.156396 | -0.663357 |
| H | -5.580154 | -3.174775 | 0.770165  |

|                                             |           |           |           |   |           |           |           |
|---------------------------------------------|-----------|-----------|-----------|---|-----------|-----------|-----------|
| H                                           | -5.152957 | -1.214979 | 2.176469  | C | -0.688473 | -2.086279 | -1.126197 |
| H                                           | -3.441675 | -3.157710 | -0.520086 | C | -0.522835 | 2.624296  | -0.685861 |
| H                                           | -3.250671 | -2.474854 | 1.090542  | C | 0.404369  | 2.877670  | 0.484427  |
| H                                           | -2.986364 | 2.254760  | 0.685857  | C | 1.570600  | 1.894529  | 0.694133  |
| H                                           | -3.674762 | 1.968202  | -0.901339 | C | 1.147106  | 0.417284  | 0.830393  |
| H                                           | 1.381930  | -1.788320 | -1.853042 | C | -3.351535 | -0.868160 | -2.041616 |
| H                                           | 0.990815  | -2.020293 | -0.151156 | C | 1.323303  | 0.352017  | -1.848134 |
| H                                           | -0.946189 | -2.980835 | -1.310693 | C | -5.662401 | 1.561438  | -0.018260 |
| H                                           | -1.030873 | -1.595381 | -2.405904 | O | -7.088111 | -0.615257 | 0.997131  |
| H                                           | -0.398623 | 2.929418  | 1.325379  | O | -0.706043 | 3.491662  | -1.527934 |
| H                                           | 0.412596  | 4.100250  | 0.268761  | C | 1.995177  | -0.341594 | 1.867855  |
| H                                           | 1.955758  | 2.477659  | 1.247779  | C | 3.504349  | -0.327516 | 1.578114  |
| H                                           | 1.995180  | 2.367978  | -0.495508 | C | 1.722333  | 0.188608  | 3.282749  |
| H                                           | -4.668781 | -0.645111 | -1.990054 | C | 3.940170  | -1.172305 | 0.382366  |
| H                                           | -3.440452 | -1.807915 | -2.497286 | C | 5.457826  | -1.254744 | 0.155167  |
| H                                           | -3.084519 | -0.081050 | -2.498587 | C | 5.741732  | -2.180321 | -1.033508 |
| H                                           | 0.766928  | 1.776073  | -2.231387 | C | 6.127823  | 0.136044  | 0.021107  |
| H                                           | 0.459099  | 0.238610  | -3.029375 | C | 7.642009  | 0.025368  | -0.184711 |
| H                                           | 2.059739  | 0.584947  | -2.367792 | C | 5.501183  | 1.015251  | -1.065983 |
| H                                           | -5.501146 | 2.212507  | -0.020710 | H | -3.127281 | 0.151165  | 1.261198  |
| H                                           | -6.922248 | 1.228207  | 0.626446  | H | -1.358736 | 1.113251  | -1.858882 |
| H                                           | -7.471071 | -1.044999 | 0.596401  | H | -1.482675 | -1.588183 | 0.782088  |
| H                                           | 1.756346  | -1.139220 | 1.370531  | O | -0.253895 | 0.367178  | 1.226262  |
| H                                           | 3.878994  | 0.858918  | 0.468266  | H | -5.717224 | -1.912300 | -0.931882 |
| H                                           | 3.263453  | -0.468467 | -0.504277 | H | -5.780627 | -2.879204 | 0.544609  |
| H                                           | 2.774935  | -0.326679 | 3.349696  | H | -5.333263 | -0.897068 | 1.917442  |
| H                                           | 1.288109  | 0.604647  | 3.164717  | H | -3.534060 | -3.086489 | -0.520119 |
| H                                           | 2.856333  | 1.336456  | 2.769822  | H | -3.445460 | -2.351084 | 1.075754  |
| H                                           | 3.991451  | -2.060619 | 1.367968  | H | -2.760757 | 2.325990  | 0.511363  |
| H                                           | 4.805427  | -0.707986 | 2.126189  | H | -3.308215 | 2.015662  | -1.125889 |
| H                                           | 6.394413  | -2.013138 | 0.897925  | H | 1.506250  | -2.152712 | -1.359724 |
| H                                           | 4.842735  | -1.609133 | -1.712759 | H | 0.919250  | -2.268472 | 0.297643  |
| H                                           | 6.206461  | -2.691129 | -1.416140 | H | -0.950362 | -3.143387 | -1.019643 |
| H                                           | 4.643126  | -3.026619 | -0.672418 | H | -0.811785 | -1.820642 | -2.183116 |
| H                                           | 5.874545  | 0.486125  | -0.756149 | H | -0.221039 | 2.858019  | 1.384803  |
| H                                           | 7.492157  | 1.583205  | 0.830596  | H | 0.800073  | 3.889605  | 0.366311  |
| H                                           | 5.995207  | 1.115221  | 1.638129  | H | 2.074949  | 2.219586  | 1.607960  |
| H                                           | 7.456020  | 0.134746  | 1.846940  | H | 2.307872  | 1.998585  | -0.108169 |
| H                                           | 8.357747  | 0.446831  | -1.107654 | H | -3.222480 | -1.838381 | -2.532975 |
| H                                           | 7.572528  | -0.952896 | -1.838989 | H | -2.714020 | -0.151627 | -2.564442 |
| H                                           | 8.437294  | -1.127679 | -0.301983 | H | -4.386740 | -0.551520 | -2.203333 |
| $\omega$ B97XD energy = -1358.21082835 a.u. |           |           |           | H | 1.203706  | 1.433378  | -1.940382 |
| Swinhoeisterol F (10), Conf. E              |           |           |           | H | 0.813329  | -0.099112 | -2.706538 |
| C                                           | -5.307832 | -2.006029 | 0.083000  | H | 2.390803  | 0.136051  | -1.956727 |
| C                                           | -5.682949 | -0.759036 | 0.885597  | H | -5.185147 | 2.449175  | -0.418452 |
| C                                           | -4.979130 | 0.464473  | 0.318914  | H | -6.737255 | 1.613211  | 0.125922  |
| C                                           | -3.468291 | 0.313414  | 0.226079  | H | -7.465784 | -0.610824 | 0.108846  |
| C                                           | -3.035830 | -0.974621 | -0.540826 | H | 1.654429  | -1.382764 | 1.854794  |
| C                                           | -3.793105 | -2.185072 | 0.047424  | H | 4.019833  | -0.702439 | 2.472658  |
| C                                           | -2.759374 | 1.577476  | -0.288579 | H | 3.835618  | 0.711016  | 1.456115  |
| C                                           | -1.312809 | 1.323960  | -0.786072 | H | 2.138781  | -0.501935 | 4.023657  |
| C                                           | -0.675595 | 0.110354  | -0.135643 | H | 0.649991  | 0.282063  | 3.474358  |
| C                                           | -1.531610 | -1.169131 | -0.230588 | H | 2.187358  | 1.166110  | 3.453615  |
| C                                           | 0.773998  | -0.238882 | -0.553676 | H | 3.469763  | -0.799199 | -0.532496 |
| C                                           | 0.745808  | -1.782265 | -0.665886 | H | 3.558669  | -2.192561 | 0.519223  |
|                                             |           |           |           | H | 5.900529  | -1.721747 | 1.048255  |

|   |          |           |           |
|---|----------|-----------|-----------|
| H | 6.811478 | -2.365630 | -1.167643 |
| H | 5.257449 | -3.151872 | -0.884232 |
| H | 5.353128 | -1.762789 | -1.970087 |
| H | 5.978630 | 0.648431  | 0.980673  |
| H | 8.120699 | 1.004067  | -0.068995 |
| H | 8.094607 | -0.656279 | 0.545077  |
| H | 7.888927 | -0.343083 | -1.186887 |
| H | 6.017908 | 1.979687  | -1.122411 |
| H | 4.444036 | 1.222831  | -0.869046 |
| H | 5.573138 | 0.547382  | -2.054673 |

ωB97XD energy = -1358.21035886 a.u.

Swinhoeisterol F (**10**), Conf. F

|   |           |           |           |
|---|-----------|-----------|-----------|
| C | 4.935429  | -2.658220 | 0.009214  |
| C | 5.375974  | -1.739473 | -1.131342 |
| C | 5.019126  | -0.294317 | -0.817635 |
| C | 3.550628  | -0.082079 | -0.481376 |
| C | 3.048052  | -1.034934 | 0.646956  |
| C | 3.446633  | -2.483578 | 0.291713  |
| C | 3.194285  | 1.390404  | -0.216299 |
| C | 1.848265  | 1.582541  | 0.527509  |
| C | 0.889094  | 0.426322  | 0.315414  |
| C | 1.502425  | -0.955205 | 0.620039  |
| C | -0.486628 | 0.516662  | 1.020754  |
| C | -0.717248 | -0.928566 | 1.528500  |
| C | 0.703100  | -1.424533 | 1.843589  |
| C | 1.299573  | 2.968426  | 0.206114  |
| C | 0.231282  | 3.145296  | -0.851416 |
| C | -1.114712 | 2.433640  | -0.616372 |
| C | -0.999829 | 0.908888  | -0.409461 |
| C | 3.663761  | -0.664666 | 2.006298  |
| C | -0.692256 | 1.489530  | 2.175857  |
| C | 5.937753  | 0.673009  | -0.882233 |
| O | 6.740257  | -1.936932 | -1.459636 |
| O | 1.788015  | 3.940484  | 0.764248  |
| C | -2.189045 | 0.136717  | -0.987789 |
| C | -3.465534 | 0.436763  | -0.190419 |
| C | -2.360594 | 0.355006  | -2.495330 |
| C | -4.648131 | -0.455343 | -0.579077 |
| C | -5.816540 | -0.406485 | 0.417462  |
| C | -6.415850 | 1.001342  | 0.510020  |
| C | -6.905286 | -1.472866 | 0.139077  |
| C | -7.571852 | -1.327058 | -1.232843 |
| C | -6.381305 | -2.900315 | 0.326841  |
| H | 2.995515  | -0.393510 | -1.380871 |
| H | 2.057718  | 1.613373  | 1.601315  |
| H | 1.180885  | -1.575323 | -0.225935 |
| O | 0.254073  | 0.452790  | -0.990379 |
| H | 5.533321  | -2.431334 | 0.902250  |
| H | 5.148824  | -3.695431 | -0.269418 |
| H | 4.826619  | -2.028159 | -2.037496 |
| H | 3.134546  | -3.155215 | 1.099795  |
| H | 2.890924  | -2.791252 | -0.604309 |
| H | 3.177764  | 1.920416  | -1.174829 |
| H | 3.964778  | 1.869907  | 0.392747  |
| H | -1.383372 | -0.951954 | 2.396304  |

|   |           |           |           |
|---|-----------|-----------|-----------|
| H | -1.155526 | -1.575289 | 0.763832  |
| H | 0.752620  | -2.506925 | 1.996566  |
| H | 1.076111  | -0.943520 | 2.756261  |
| H | 0.655635  | 2.765160  | -1.787773 |
| H | 0.061389  | 4.219060  | -0.963176 |
| H | -1.722260 | 2.640062  | -1.500983 |
| H | -1.644249 | 2.888396  | 0.226148  |
| H | 3.476235  | -1.452599 | 2.743404  |
| H | 3.266243  | 0.265977  | 2.417872  |
| H | 4.747836  | -0.538787 | 1.923416  |
| H | -0.351319 | 2.508194  | 1.979328  |
| H | -0.159377 | 1.137439  | 3.065850  |
| H | -1.756722 | 1.545570  | 2.429291  |
| H | 5.710792  | 1.712528  | -0.672803 |
| H | 6.958343  | 0.450847  | -1.178488 |
| H | 7.268583  | -1.802396 | -0.663105 |
| H | -1.956418 | -0.925454 | -0.855156 |
| H | -3.732149 | 1.493512  | -0.319601 |
| H | -3.256090 | 0.294858  | 0.878908  |
| H | -2.998503 | -0.423878 | -2.923770 |
| H | -1.394423 | 0.308671  | -3.008012 |
| H | -2.826671 | 1.319234  | -2.725878 |
| H | -4.283289 | -1.487395 | -0.659953 |
| H | -5.008240 | -0.172795 | -1.576313 |
| H | -5.403061 | -0.648892 | 1.408649  |
| H | -6.713080 | 1.378802  | -0.475529 |
| H | -7.302741 | 1.010469  | 1.154059  |
| H | -5.699518 | 1.714884  | 0.929670  |
| H | -7.682878 | -1.314186 | 0.900346  |
| H | -8.383503 | -2.055049 | -1.342105 |
| H | -8.002946 | -0.331100 | -1.378296 |
| H | -6.859130 | -1.509415 | -2.045378 |
| H | -7.205020 | -3.622374 | 0.299722  |
| H | -5.870155 | -3.014195 | 1.289979  |
| H | -5.676207 | -3.183098 | -0.462991 |

ωB97XD energy = -1358.21019031 a.u.

Swinhoeisterol F (**10**), Conf. G

|   |           |           |           |
|---|-----------|-----------|-----------|
| C | 4.363465  | -2.972690 | 0.157626  |
| C | 4.803540  | -2.269806 | -1.127959 |
| C | 4.670984  | -0.761786 | -0.979397 |
| C | 3.280698  | -0.307513 | -0.561201 |
| C | 2.770323  | -1.033215 | 0.722877  |
| C | 2.946253  | -2.556798 | 0.540156  |
| C | 3.137858  | 1.221881  | -0.476696 |
| C | 1.902311  | 1.689535  | 0.334188  |
| C | 0.790803  | 0.657884  | 0.356757  |
| C | 1.251052  | -0.744479 | 0.801986  |
| C | -0.491891 | 1.024199  | 1.144079  |
| C | -0.853448 | -0.299283 | 1.862856  |
| C | 0.514236  | -0.946150 | 2.132505  |
| C | 1.503735  | 3.084640  | -0.134228 |
| C | 0.374415  | 3.269560  | -1.124786 |
| C | -1.021887 | 2.785150  | -0.690469 |
| C | -1.081993 | 1.297417  | -0.284108 |
| C | 3.552448  | -0.586338 | 1.968368  |

|   |           |           |           |
|---|-----------|-----------|-----------|
| C | -0.464676 | 2.155626  | 2.164410  |
| C | 5.700608  | 0.050152  | -1.233707 |
| O | 6.090722  | -2.696870 | -1.538148 |
| O | 2.157009  | 4.044718  | 0.248478  |
| C | -2.403512 | 0.626406  | -0.668068 |
| C | -3.561288 | 1.194664  | 0.165092  |
| C | -2.673799 | 0.679105  | -2.176166 |
| C | -4.924042 | 0.539850  | -0.101822 |
| C | -4.989743 | -0.986984 | 0.088260  |
| C | -4.692774 | -1.354946 | 1.546098  |
| C | -6.344876 | -1.558331 | -0.398556 |
| C | -6.541974 | -1.365657 | -1.907965 |
| C | -6.505094 | -3.046277 | -0.064045 |
| H | 2.606263  | -0.650642 | -1.362200 |
| H | 2.211978  | 1.828019  | 1.374673  |
| H | 0.777548  | -1.415175 | 0.074326  |
| O | 0.046488  | 0.604121  | -0.888506 |
| H | 5.074839  | -2.730394 | 0.958449  |
| H | 4.410282  | -4.055233 | 0.000237  |
| H | 4.132215  | -2.585538 | -1.937641 |
| H | 2.639471  | -3.070340 | 1.458696  |
| H | 2.265692  | -2.896918 | -0.251706 |
| H | 3.096946  | 1.623522  | -1.495169 |
| H | 4.015207  | 1.667365  | -0.001414 |
| H | -1.427811 | -0.120091 | 2.777038  |
| H | -1.444864 | -0.968827 | 1.232662  |
| H | 0.434569  | -1.999054 | 2.419595  |
| H | 1.027706  | -0.418735 | 2.946236  |
| H | 0.658143  | 2.721591  | -2.030491 |
| H | 0.330172  | 4.334320  | -1.367411 |
| H | -1.681021 | 2.958991  | -1.544561 |
| H | -1.406460 | 3.411556  | 0.119845  |
| H | 3.303952  | -1.218542 | 2.827487  |
| H | 3.348660  | 0.447988  | 2.254042  |
| H | 4.631346  | -0.663645 | 1.801748  |
| H | -0.022140 | 3.085302  | 1.800577  |
| H | 0.106200  | 1.853355  | 3.049169  |
| H | -1.484390 | 2.385381  | 2.492781  |
| H | 5.634374  | 1.128432  | -1.139021 |
| H | 6.649541  | -0.349635 | -1.577860 |
| H | 6.706582  | -2.551569 | -0.809274 |
| H | -2.281493 | -0.431115 | -0.414899 |
| H | -3.660522 | 2.268519  | -0.041825 |
| H | -3.306956 | 1.113245  | 1.228834  |
| H | -3.424075 | -0.066375 | -2.457213 |
| H | -1.763296 | 0.459193  | -2.742841 |
| H | -3.051825 | 1.655477  | -2.499255 |
| H | -5.228655 | 0.797540  | -1.120505 |
| H | -5.666793 | 1.001950  | 0.563746  |
| H | -4.214096 | -1.451107 | -0.539715 |
| H | -4.566521 | -2.432373 | 1.682902  |
| H | -3.770822 | -0.881387 | 1.895394  |
| H | -5.505067 | -1.023214 | 2.206014  |
| H | -7.142613 | -1.007966 | 0.124067  |
| H | -7.494531 | -1.799901 | -2.230469 |
| H | -6.549479 | -0.313869 | -2.206749 |

|   |           |           |           |
|---|-----------|-----------|-----------|
| H | -5.743318 | -1.869348 | -2.467973 |
| H | -7.429147 | -3.440694 | -0.500753 |
| H | -6.549489 | -3.230810 | 1.012981  |
| H | -5.670445 | -3.629899 | -0.473651 |

ωB97XD energy = -1358.21017261 a.u.

Swinhoeisterol F (**10**), Conf. H

|   |           |           |           |
|---|-----------|-----------|-----------|
| C | 5.023979  | -2.638895 | -0.036618 |
| C | 5.476675  | -1.669307 | -1.129280 |
| C | 5.096288  | -0.241920 | -0.764998 |
| C | 3.618522  | -0.060696 | -0.451224 |
| C | 3.106422  | -1.062791 | 0.629204  |
| C | 3.528273  | -2.491652 | 0.224081  |
| C | 3.236921  | 1.396218  | -0.138313 |
| C | 1.874517  | 1.543661  | 0.586400  |
| C | 0.934932  | 0.383808  | 0.313828  |
| C | 1.560880  | -1.000226 | 0.577440  |
| C | -0.454396 | 0.429510  | 0.997063  |
| C | -0.674310 | -1.037197 | 1.444308  |
| C | 0.746723  | -1.524971 | 1.768142  |
| C | 1.312188  | 2.933485  | 0.307855  |
| C | 0.259234  | 3.136150  | -0.760702 |
| C | -1.080550 | 2.397752  | -0.578958 |
| C | -0.947658 | 0.868426  | -0.426376 |
| C | 3.692621  | -0.740675 | 2.013554  |
| C | -0.693035 | 1.354527  | 2.184699  |
| C | 6.005120  | 0.736724  | -0.769960 |
| O | 6.849308  | -1.838378 | -1.437775 |
| O | 1.777068  | 3.890127  | 0.910849  |
| C | -2.115209 | 0.102720  | -1.055310 |
| C | -3.413890 | 0.369234  | -0.281496 |
| C | -2.251505 | 0.363544  | -2.559766 |
| C | -4.566213 | -0.551753 | -0.689828 |
| C | -5.789270 | -0.477501 | 0.238474  |
| C | -6.449316 | 0.904721  | 0.175330  |
| C | -6.776615 | -1.640150 | -0.028365 |
| C | -7.807684 | -1.792069 | 1.094292  |
| C | -7.480721 | -1.547845 | -1.386187 |
| H | 3.085604  | -0.344277 | -1.373073 |
| H | 2.064215  | 1.536151  | 1.664322  |
| H | 1.261954  | -1.591570 | -0.297041 |
| O | 0.322387  | 0.451070  | -1.001199 |
| H | 5.601793  | -2.443052 | 0.876666  |
| H | 5.254201  | -3.661356 | -0.353762 |
| H | 4.948812  | -1.926613 | -2.057389 |
| H | 3.208991  | -3.198544 | 0.998546  |
| H | 2.992866  | -2.768588 | -0.693988 |
| H | 3.231780  | 1.961072  | -1.076875 |
| H | 3.988506  | 1.862522  | 0.503589  |
| H | -1.357576 | -1.103576 | 2.296375  |
| H | -1.087457 | -1.659531 | 0.646262  |
| H | 0.809433  | -2.611341 | 1.883571  |
| H | 1.096094  | -1.071695 | 2.704159  |
| H | 0.705282  | 2.799615  | -1.703469 |
| H | 0.076008  | 4.211094  | -0.833782 |
| H | -1.673575 | 2.627748  | -1.467761 |



|   |           |           |           |
|---|-----------|-----------|-----------|
| H | -1.633368 | 2.813322  | 0.268789  |
| H | 3.489980  | -1.554484 | 2.717716  |
| H | 3.284997  | 0.174687  | 2.448620  |
| H | 4.778018  | -0.611236 | 1.959045  |
| H | -0.364604 | 2.384721  | 2.031840  |
| H | -0.168739 | 0.976541  | 3.069127  |
| H | -1.761895 | 1.385943  | 2.423413  |
| H | 5.762588  | 1.764803  | -0.524312 |
| H | 7.034232  | 0.536330  | -1.051996 |
| H | 7.360116  | -1.735163 | -0.625371 |
| H | -1.875632 | -0.960569 | -0.947326 |
| H | -3.704756 | 1.418810  | -0.416998 |
| H | -3.222517 | 0.232015  | 0.791832  |
| H | -2.866045 | -0.411220 | -3.027912 |
| H | -1.272256 | 0.346814  | -3.048737 |
| H | -2.726112 | 1.327645  | -2.773414 |
| H | -4.194354 | -1.586326 | -0.701426 |
| H | -4.873492 | -0.320314 | -1.717506 |
| H | -5.420442 | -0.621889 | 1.265528  |
| H | -7.364502 | 0.949759  | 0.774400  |
| H | -5.776443 | 1.678973  | 0.556984  |
| H | -6.708148 | 1.172991  | -0.855868 |
| H | -6.170734 | -2.557886 | -0.032981 |
| H | -8.385806 | -2.713744 | 0.963990  |
| H | -7.323985 | -1.838239 | 2.076775  |
| H | -8.521127 | -0.960144 | 1.107501  |
| H | -8.092063 | -2.440065 | -1.561390 |
| H | -6.769012 | -1.470182 | -2.214493 |
| H | -8.148466 | -0.679502 | -1.430921 |

ωB97XD energy = -1358.21011003 a.u.

#### Swinhoeisterol F (**10**), Conf. I

|   |           |           |           |
|---|-----------|-----------|-----------|
| C | -5.428804 | -1.869255 | 0.145085  |
| C | -5.732326 | -0.613084 | 0.963509  |
| C | -4.986697 | 0.583659  | 0.392797  |
| C | -3.486204 | 0.366439  | 0.264978  |
| C | -3.129822 | -0.931500 | -0.524514 |
| C | -3.924685 | -2.112582 | 0.073345  |
| C | -2.731159 | 1.603318  | -0.250990 |
| C | -1.311439 | 1.289187  | -0.789267 |
| C | -0.712219 | 0.040284  | -0.170237 |
| C | -1.628737 | -1.197103 | -0.255177 |
| C | 0.706716  | -0.368291 | -0.636340 |
| C | 0.604673  | -1.907355 | -0.759905 |
| C | -0.853840 | -2.142368 | -1.182849 |
| C | -0.458091 | 2.549522  | -0.703224 |
| C | 0.510851  | 2.748912  | 0.443241  |
| C | 1.634583  | 1.711866  | 0.622558  |
| C | 1.150971  | 0.253412  | 0.745956  |
| C | -3.477381 | -0.796984 | -2.016100 |
| C | 1.230067  | 0.205008  | -1.949590 |
| C | -5.628091 | 1.713161  | 0.082068  |
| O | -7.127173 | -0.408575 | 1.104943  |
| O | -0.622633 | 3.431211  | -1.534108 |
| C | 2.000879  | -0.557797 | 1.743618  |
| C | 3.514013  | -0.491798 | 1.489274  |

|   |           |           |           |
|---|-----------|-----------|-----------|
| C | 1.691525  | -0.139373 | 3.187017  |
| C | 3.960048  | -0.982829 | 0.114530  |
| C | 5.475932  | -1.171327 | -0.053085 |
| C | 5.766642  | -1.702303 | -1.461178 |
| C | 6.286445  | 0.098711  | 0.305973  |
| C | 7.796718  | -0.132717 | 0.193185  |
| C | 5.872436  | 1.336022  | -0.497155 |
| H | -3.130477 | 0.176908  | 1.290542  |
| H | -1.398279 | 1.091850  | -1.861845 |
| H | -1.572660 | -1.629198 | 0.751569  |
| O | -0.238968 | 0.257332  | 1.181022  |
| H | -5.856670 | -1.752086 | -0.859659 |
| H | -5.927628 | -2.724724 | 0.612506  |
| H | -5.367831 | -0.774330 | 1.986858  |
| H | -3.716979 | -3.020440 | -0.504756 |
| H | -3.561083 | -2.299546 | 1.092534  |
| H | -2.677682 | 2.339892  | 0.558277  |
| H | -3.279239 | 2.078342  | -1.068616 |
| H | 1.330488  | -2.305969 | -1.475255 |
| H | 0.777603  | -2.409285 | 0.195613  |
| H | -1.160476 | -3.187574 | -1.078045 |
| H | -0.995074 | -1.861169 | -2.233372 |
| H | -0.093133 | 2.752037  | 1.358428  |
| H | 0.950096  | 3.742390  | 0.322804  |
| H | 2.163452  | 2.001702  | 1.534778  |
| H | 2.366961  | 1.791264  | -0.187511 |
| H | -3.410745 | -1.768907 | -2.516424 |
| H | -2.816249 | -0.110762 | -2.550456 |
| H | -4.497802 | -0.424527 | -2.150568 |
| H | 1.231274  | 1.295806  | -2.001698 |
| H | 0.610198  | -0.153193 | -2.779288 |
| H | 2.252331  | -0.131692 | -2.143039 |
| H | -5.122397 | 2.584224  | -0.319604 |
| H | -6.696257 | 1.809713  | 0.250615  |
| H | -7.521458 | -0.377901 | 0.224386  |
| H | 1.695671  | -1.605482 | 1.650347  |
| H | 4.002628  | -1.103615 | 2.259607  |
| H | 3.864026  | 0.534673  | 1.655323  |
| H | 2.236838  | -0.784669 | 3.883884  |
| H | 0.624627  | -0.227075 | 3.405870  |
| H | 1.996924  | 0.893340  | 3.391440  |
| H | 3.607234  | -0.286699 | -0.653466 |
| H | 3.469930  | -1.942353 | -0.096555 |
| H | 5.790689  | -1.946220 | 0.662908  |
| H | 6.826187  | -1.934014 | -1.606032 |
| H | 5.202521  | -2.623495 | -1.645242 |
| H | 5.472416  | -0.979470 | -2.231283 |
| H | 6.078645  | 0.311732  | 1.362842  |
| H | 8.348773  | 0.701618  | 0.639832  |
| H | 8.100406  | -1.049650 | 0.711808  |
| H | 8.118229  | -0.215650 | -0.851220 |
| H | 6.469488  | 2.204110  | -0.196196 |
| H | 4.819577  | 1.594202  | -0.340325 |
| H | 6.027087  | 1.189122  | -1.572311 |

ωB97XD energy = -1358.20997778 a.u.

Swinhoeisterol F (**10**), Conf. J

|   |           |           |           |
|---|-----------|-----------|-----------|
| C | -5.206513 | -2.098570 | -0.059649 |
| C | -5.644228 | -0.879373 | 0.753961  |
| C | -4.951562 | 0.374877  | 0.243892  |
| C | -3.434962 | 0.264455  | 0.202581  |
| C | -2.942703 | -0.993936 | -0.577700 |
| C | -3.687017 | -2.236884 | -0.042642 |
| C | -2.742379 | 1.558560  | -0.256947 |
| C | -1.277860 | 1.351805  | -0.719871 |
| C | -0.626367 | 0.143542  | -0.073524 |
| C | -1.444473 | -1.155750 | -0.221533 |
| C | 0.843057  | -0.154436 | -0.457932 |
| C | 0.862893  | -1.695716 | -0.597519 |
| C | -0.548375 | -2.032762 | -1.106151 |
| C | -0.526202 | 2.669873  | -0.576620 |
| C | 0.345882  | 2.930152  | 0.632727  |
| C | 1.534313  | 1.979467  | 0.867143  |
| C | 1.157808  | 0.486175  | 0.951388  |
| C | -3.212560 | -0.861217 | -2.085511 |
| C | 1.394351  | 0.471107  | -1.734804 |
| C | -5.650772 | 1.462105  | -0.092349 |
| O | -7.056079 | -0.773376 | 0.812262  |
| O | -0.697830 | 3.542256  | -1.415971 |
| C | 2.006626  | -0.267881 | 1.992626  |
| C | 3.523178  | -0.094057 | 1.825062  |
| C | 1.589319  | 0.118076  | 3.417714  |
| C | 4.086210  | -0.515056 | 0.468406  |
| C | 5.622830  | -0.512482 | 0.410022  |
| C | 6.211577  | -1.738219 | 1.116433  |
| C | 6.169003  | -0.374756 | -1.032477 |
| C | 5.610661  | -1.428894 | -1.994841 |
| C | 5.947244  | 1.031395  | -1.599098 |
| H | -3.126932 | 0.085570  | 1.245198  |
| H | -1.290433 | 1.157798  | -1.796466 |
| H | -1.418511 | -1.593783 | 0.783910  |
| O | -0.251158 | 0.379623  | 1.304621  |
| H | -5.580574 | -1.994964 | -1.087135 |
| H | -5.672038 | -2.993040 | 0.367062  |
| H | -5.333120 | -1.032245 | 1.796055  |
| H | -3.383197 | -3.118535 | -0.618952 |
| H | -3.372780 | -2.416182 | 0.994301  |
| H | -2.783766 | 2.284643  | 0.562460  |
| H | -3.277692 | 2.006905  | -1.097600 |
| H | 1.653764  | -2.032624 | -1.274418 |
| H | 1.020266  | -2.194970 | 0.362077  |
| H | -0.782454 | -3.098453 | -1.024318 |
| H | -0.647782 | -1.753030 | -2.161846 |
| H | -0.312765 | 2.871822  | 1.507237  |
| H | 0.712772  | 3.956314  | 0.549639  |
| H | 1.988547  | 2.296358  | 1.809806  |
| H | 2.301422  | 2.126545  | 0.099794  |
| H | -3.046346 | -1.817395 | -2.593030 |
| H | -2.575375 | -0.119801 | -2.572510 |
| H | -4.249009 | -0.564113 | -2.273511 |
| H | 1.311466  | 1.559022  | -1.779497 |
| H | 0.853378  | 0.074500  | -2.601115 |

|   |           |           |           |
|---|-----------|-----------|-----------|
| H | 2.449375  | 0.218645  | -1.872472 |
| H | -5.182742 | 2.371437  | -0.452904 |
| H | -6.731053 | 1.482846  | 0.014151  |
| H | -7.397974 | -0.755689 | -0.090189 |
| H | 1.782650  | -1.334039 | 1.879780  |
| H | 4.001611  | -0.678664 | 2.620342  |
| H | 3.798351  | 0.952336  | 2.016410  |
| H | 1.809109  | 1.168516  | 3.640644  |
| H | 2.139927  | -0.491297 | 4.142327  |
| H | 0.521187  | -0.047017 | 3.578040  |
| H | 3.697049  | 0.167675  | -0.291393 |
| H | 3.712220  | -1.514438 | 0.207774  |
| H | 5.971193  | 0.377239  | 0.956187  |
| H | 5.909766  | -2.668042 | 0.620411  |
| H | 7.306849  | -1.701309 | 1.121894  |
| H | 5.880941  | -1.801440 | 2.158345  |
| H | 7.255257  | -0.529238 | -0.966414 |
| H | 6.110286  | -1.363899 | -2.967529 |
| H | 5.751979  | -2.447463 | -1.618490 |
| H | 4.538260  | -1.280046 | -2.167931 |
| H | 4.881929  | 1.245851  | -1.747513 |
| H | 6.438452  | 1.141330  | -2.572395 |
| H | 6.353214  | 1.798731  | -0.930222 |

ωB97XD energy = -1358.20957274 a.u.

Swinhoeisterol F (**10**), Conf. K

|   |           |           |           |
|---|-----------|-----------|-----------|
| C | -4.991205 | -2.302993 | 0.536423  |
| C | -5.515095 | -0.970640 | 1.074614  |
| C | -4.949788 | 0.186455  | 0.265085  |
| C | -3.430900 | 0.193376  | 0.182826  |
| C | -2.845022 | -1.166447 | -0.309427 |
| C | -3.465752 | -2.310278 | 0.521721  |
| C | -2.867780 | 1.396113  | -0.592326 |
| C | -1.395516 | 1.214353  | -1.042329 |
| C | -0.632128 | 0.243897  | -0.160724 |
| C | -1.332285 | -1.118755 | 0.015820  |
| C | 0.854569  | -0.012112 | -0.509104 |
| C | 1.005482  | -1.539110 | -0.301473 |
| C | -0.376035 | -2.091733 | -0.685680 |
| C | -0.762684 | 2.590022  | -1.219475 |
| C | 0.104733  | 3.185100  | -0.130065 |
| C | 1.376807  | 2.411634  | 0.263954  |
| C | 1.126415  | 0.954259  | 0.706123  |
| C | -3.153041 | -1.406069 | -1.796823 |
| C | 1.358905  | 0.363044  | -1.898828 |
| C | -5.752311 | 1.107691  | -0.274728 |
| O | -6.928296 | -0.968581 | 1.173533  |
| O | -1.026255 | 3.235700  | -2.223798 |
| C | 2.038826  | 0.533421  | 1.872556  |
| C | 3.543095  | 0.662783  | 1.584023  |
| C | 1.674508  | 1.307807  | 3.147245  |
| C | 4.098961  | -0.364785 | 0.597249  |
| C | 5.580451  | -0.166625 | 0.244028  |
| C | 6.481261  | -0.273126 | 1.479540  |
| C | 6.058728  | -1.106901 | -0.890523 |
| C | 5.964474  | -2.595554 | -0.539731 |

|   |           |           |           |
|---|-----------|-----------|-----------|
| C | 5.342805  | -0.832305 | -2.217440 |
| H | -3.082023 | 0.288692  | 1.223635  |
| H | -1.401659 | 0.781872  | -2.047204 |
| H | -1.247826 | -1.314603 | 1.091996  |
| O | -0.265743 | 0.822513  | 1.115209  |
| H | -5.396476 | -2.465012 | -0.471453 |
| H | -5.366855 | -3.111688 | 1.171852  |
| H | -5.162252 | -0.857116 | 2.108302  |
| H | -3.096203 | -3.272028 | 0.147119  |
| H | -3.114952 | -2.220823 | 1.558491  |
| H | -2.965737 | 2.289536  | 0.034069  |
| H | -3.453491 | 1.582749  | -1.496116 |
| H | 1.816573  | -1.954704 | -0.906876 |
| H | 1.214085  | -1.793630 | 0.741101  |
| H | -0.519677 | -3.130831 | -0.374881 |
| H | -0.509842 | -2.050297 | -1.773761 |
| H | -0.529373 | 3.267725  | 0.760342  |
| H | 0.376141  | 4.194221  | -0.450382 |
| H | 1.825839  | 2.972648  | 1.087734  |
| H | 2.108281  | 2.436038  | -0.549410 |
| H | -2.920505 | -2.439085 | -2.076635 |
| H | -2.585160 | -0.752411 | -2.462790 |
| H | -4.213314 | -1.236357 | -2.009270 |
| H | 1.102645  | 1.375847  | -2.216248 |
| H | 0.939259  | -0.322197 | -2.643650 |
| H | 2.448583  | 0.275826  | -1.955002 |
| H | -5.378579 | 1.947868  | -0.849532 |
| H | -6.826998 | 1.061653  | -0.126919 |
| H | -7.296079 | -1.172043 | 0.304567  |
| H | 1.826099  | -0.521696 | 2.077738  |
| H | 4.064265  | 0.556428  | 2.542697  |
| H | 3.768243  | 1.678754  | 1.230328  |
| H | 2.173800  | 0.856736  | 4.011053  |
| H | 0.597103  | 1.288153  | 3.332114  |
| H | 1.994397  | 2.354816  | 3.098404  |
| H | 3.513666  | -0.330476 | -0.324112 |
| H | 3.952234  | -1.368348 | 1.018874  |
| H | 5.686316  | 0.856302  | -0.149307 |
| H | 7.539921  | -0.238208 | 1.197589  |
| H | 6.303047  | 0.548675  | 2.179690  |
| H | 6.310575  | -1.210126 | 2.023000  |
| H | 7.122064  | -0.874294 | -1.044063 |
| H | 6.399037  | -3.203952 | -1.340671 |
| H | 6.500540  | -2.836391 | 0.383953  |
| H | 4.922302  | -2.913218 | -0.417559 |
| H | 5.846684  | -1.347982 | -3.042547 |
| H | 5.328655  | 0.238758  | -2.451335 |
| H | 4.306138  | -1.187966 | -2.199681 |

ωB97XD energy = -1358.20943355 a.u.

Swinhoeisterol F (**10**), Conf. L

|   |          |           |           |
|---|----------|-----------|-----------|
| C | 4.923285 | -2.693509 | 0.049282  |
| C | 5.409955 | -1.752618 | -1.053735 |
| C | 5.058411 | -0.311394 | -0.717047 |
| C | 3.581876 | -0.091113 | -0.423465 |
| C | 3.033847 | -1.063951 | 0.666086  |

|   |           |           |           |
|---|-----------|-----------|-----------|
| C | 3.428230  | -2.508367 | 0.289134  |
| C | 3.231793  | 1.378875  | -0.137870 |
| C | 1.861956  | 1.570444  | 0.561750  |
| C | 0.900964  | 0.426796  | 0.296201  |
| C | 1.490942  | -0.966608 | 0.592910  |
| C | -0.496883 | 0.515749  | 0.957708  |
| C | -0.756388 | -0.936747 | 1.428694  |
| C | 0.648559  | -1.450912 | 1.781354  |
| C | 1.337554  | 2.967080  | 0.244890  |
| C | 0.301985  | 3.172182  | -0.840033 |
| C | -1.056470 | 2.468430  | -0.661051 |
| C | -0.959510 | 0.939290  | -0.480698 |
| C | 3.608479  | -0.732708 | 2.053157  |
| C | -0.732072 | 1.468781  | 2.123732  |
| C | 5.988697  | 0.646835  | -0.727475 |
| O | 6.781590  | -1.958015 | -1.343981 |
| O | 1.820934  | 3.925386  | 0.830499  |
| C | -2.132216 | 0.186132  | -1.114652 |
| C | -3.437153 | 0.481812  | -0.362593 |
| C | -2.246603 | 0.429389  | -2.623796 |
| C | -4.598617 | -0.415855 | -0.800027 |
| C | -5.799938 | -0.427471 | 0.160837  |
| C | -6.330875 | 0.991962  | 0.391118  |
| C | -6.917956 | -1.381283 | -0.329415 |
| C | -6.404043 | -2.801582 | -0.596417 |
| C | -8.092615 | -1.449229 | 0.654598  |
| H | 3.052740  | -0.376544 | -1.346925 |
| H | 2.035588  | 1.581054  | 1.642392  |
| H | 1.189488  | -1.566552 | -0.274794 |
| O | 0.309586  | 0.484753  | -1.028779 |
| H | 5.494694  | -2.495245 | 0.966124  |
| H | 5.134194  | -3.726056 | -0.247921 |
| H | 4.886282  | -2.013011 | -1.983356 |
| H | 3.083411  | -3.195363 | 1.070570  |
| H | 2.897912  | -2.787839 | -0.631135 |
| H | 3.255953  | 1.930021  | -1.084219 |
| H | 3.984581  | 1.835611  | 0.509455  |
| H | -1.452293 | -0.971269 | 2.272314  |
| H | -1.173412 | -1.564236 | 0.636671  |
| H | 0.684002  | -2.536231 | 1.916553  |
| H | 0.995162  | -0.988967 | 2.714152  |
| H | 0.751666  | 2.806057  | -1.770067 |
| H | 0.144624  | 4.249318  | -0.936906 |
| H | -1.633894 | 2.697032  | -1.560380 |
| H | -1.608646 | 2.911068  | 0.173298  |
| H | 3.383467  | -1.533703 | 2.765218  |
| H | 3.209751  | 0.194459  | 2.471416  |
| H | 4.696443  | -0.621477 | 2.010903  |
| H | -0.366726 | 2.485051  | 1.960469  |
| H | -0.239026 | 1.090466  | 3.025828  |
| H | -1.804301 | 1.538247  | 2.337878  |
| H | 5.765213  | 1.683596  | -0.501175 |
| H | 7.016493  | 0.420843  | -0.994548 |
| H | 7.285442  | -1.853993 | -0.527340 |
| H | -1.911044 | -0.879533 | -0.990866 |
| H | -3.697648 | 1.538937  | -0.497584 |

|   |           |           |           |
|---|-----------|-----------|-----------|
| H | -3.267630 | 0.335005  | 0.713362  |
| H | -2.876504 | -0.336238 | -3.086812 |
| H | -1.263499 | 0.380792  | -3.102832 |
| H | -2.695149 | 1.401630  | -2.855898 |
| H | -4.206597 | -1.434679 | -0.897540 |
| H | -4.946711 | -0.119228 | -1.799584 |
| H | -5.443058 | -0.816510 | 1.128861  |
| H | -7.125235 | 1.015195  | 1.141678  |
| H | -5.543086 | 1.663113  | 0.745523  |
| H | -6.732938 | 1.411832  | -0.540280 |
| H | -7.298548 | -0.976008 | -1.279893 |
| H | -7.235480 | -3.469564 | -0.846404 |
| H | -5.695153 | -2.843763 | -1.427728 |
| H | -5.906110 | -3.209994 | 0.292659  |
| H | -8.837279 | -2.176287 | 0.313046  |
| H | -8.604811 | -0.489752 | 0.766559  |
| H | -7.750375 | -1.766732 | 1.648292  |

ωB97XD energy = -1358.20916217 a.u.

Swinhoeisterol F (**10**), Conf. M

|   |           |           |           |
|---|-----------|-----------|-----------|
| C | 4.530892  | -2.767043 | -0.089552 |
| C | 5.087556  | -1.785348 | -1.121854 |
| C | 4.790250  | -0.351802 | -0.708538 |
| C | 3.317483  | -0.084139 | -0.436109 |
| C | 2.701355  | -1.091403 | 0.582971  |
| C | 3.039990  | -2.528102 | 0.129364  |
| C | 3.021459  | 1.380688  | -0.074709 |
| C | 1.653326  | 1.590286  | 0.622361  |
| C | 0.639977  | 0.516803  | 0.269073  |
| C | 1.166448  | -0.918567 | 0.480717  |
| C | -0.763636 | 0.626389  | 0.916476  |
| C | -1.093603 | -0.845443 | 1.260739  |
| C | 0.274478  | -1.447665 | 1.611816  |
| C | 1.211188  | 3.030286  | 0.396306  |
| C | 0.218149  | 3.356709  | -0.695383 |
| C | -1.179294 | 2.725992  | -0.560485 |
| C | -1.184470 | 1.181275  | -0.494671 |
| C | 3.257291  | -0.870251 | 1.999577  |
| C | -0.953320 | 1.494975  | 2.154298  |
| C | 5.761907  | 0.561792  | -0.635293 |
| O | 6.456422  | -2.034767 | -1.390054 |
| O | 1.720331  | 3.918842  | 1.064290  |
| C | -2.375819 | 0.574721  | -1.259222 |
| C | -3.747736 | 1.067338  | -0.760086 |
| C | -2.237257 | 0.829392  | -2.766906 |
| C | -4.287491 | 0.416561  | 0.517918  |
| C | -4.600025 | -1.089552 | 0.445420  |
| C | -5.138724 | -1.555167 | 1.802465  |
| C | -5.509829 | -1.475872 | -0.745358 |
| C | -5.727345 | -2.990185 | -0.829522 |
| C | -6.853114 | -0.740373 | -0.756881 |
| H | 2.800534  | -0.295015 | -1.386091 |
| H | 1.811730  | 1.515434  | 1.702282  |
| H | 0.863218  | -1.443463 | -0.433587 |
| O | 0.068000  | 0.686590  | -1.052547 |
| H | 5.087957  | -2.651748 | 0.849869  |

|   |           |           |           |
|---|-----------|-----------|-----------|
| H | 4.702302  | -3.788138 | -0.445696 |
| H | 4.578563  | -1.967749 | -2.077768 |
| H | 2.647487  | -3.242944 | 0.861926  |
| H | 2.519914  | -2.729296 | -0.816866 |
| H | 3.078102  | 1.981476  | -0.989010 |
| H | 3.782753  | 1.771827  | 0.604699  |
| H | -1.825962 | -0.924209 | 2.069959  |
| H | -1.498076 | -1.383210 | 0.399861  |
| H | 0.255649  | -2.540394 | 1.666846  |
| H | 0.617120  | -1.072247 | 2.584353  |
| H | 0.658218  | 3.013811  | -1.638381 |
| H | 0.122923  | 4.444792  | -0.734832 |
| H | -1.743800 | 3.058137  | -1.435658 |
| H | -1.698226 | 3.141428  | 0.308474  |
| H | 2.977375  | -1.699820 | 2.657545  |
| H | 2.894214  | 0.049325  | 2.464082  |
| H | 4.350002  | -0.811357 | 1.988342  |
| H | -0.521500 | 2.494929  | 2.074707  |
| H | -0.490754 | 1.015295  | 3.023648  |
| H | -2.018564 | 1.618733  | 2.375631  |
| H | 5.577100  | 1.592322  | -0.352950 |
| H | 6.785942  | 0.306324  | -0.890176 |
| H | 6.940059  | -2.009801 | -0.555231 |
| H | -2.321167 | -0.510260 | -1.125254 |
| H | -4.473116 | 0.915795  | -1.567998 |
| H | -3.711416 | 2.153039  | -0.610704 |
| H | -1.235693 | 0.576531  | -3.125650 |
| H | -2.441456 | 1.873462  | -3.029678 |
| H | -2.957746 | 0.211854  | -3.313504 |
| H | -5.200482 | 0.950410  | 0.813741  |
| H | -3.577774 | 0.571973  | 1.338306  |
| H | -3.653855 | -1.621408 | 0.281110  |
| H | -5.273953 | -2.640102 | 1.843855  |
| H | -4.440106 | -1.282083 | 2.601603  |
| H | -6.101467 | -1.086041 | 2.036952  |
| H | -4.969652 | -1.187545 | -1.657313 |
| H | -6.198815 | -3.259730 | -1.780985 |
| H | -4.777146 | -3.532857 | -0.760093 |
| H | -6.381309 | -3.351898 | -0.027939 |
| H | -7.447080 | -1.041401 | -1.627229 |
| H | -6.727228 | 0.346078  | -0.806364 |
| H | -7.443376 | -0.969353 | 0.138055  |

ωB97XD energy = -1358.20910034 a.u.

Swinhoeisterol F (**10**), Conf. N

|   |           |           |           |
|---|-----------|-----------|-----------|
| C | -5.219507 | -2.168903 | 0.162837  |
| C | -5.677345 | -0.886491 | 0.859494  |
| C | -5.022263 | 0.326951  | 0.217456  |
| C | -3.504117 | 0.248639  | 0.164010  |
| C | -2.988588 | -1.069679 | -0.492087 |
| C | -3.697045 | -2.269994 | 0.173027  |
| C | -2.850324 | 1.505075  | -0.435436 |
| C | -1.380440 | 1.291323  | -0.879228 |
| C | -0.697832 | 0.167368  | -0.121019 |
| C | -1.483981 | -1.159259 | -0.138945 |
| C | 0.778156  | -0.131651 | -0.480241 |

|   |           |           |           |
|---|-----------|-----------|-----------|
| C | 0.831803  | -1.678577 | -0.473656 |
| C | -0.571775 | -2.090958 | -0.947455 |
| C | -0.660364 | 2.634603  | -0.864659 |
| C | 0.201055  | 3.028789  | 0.315361  |
| C | 1.417006  | 2.137237  | 0.629274  |
| C | 1.079816  | 0.649620  | 0.858891  |
| C | -3.276056 | -1.094953 | -2.002170 |
| C | 1.320265  | 0.378973  | -1.810886 |
| C | -5.752741 | 1.358928  | -0.213093 |
| O | -7.090408 | -0.808220 | 0.929473  |
| O | -0.848049 | 3.416922  | -1.785406 |
| C | 1.949821  | 0.021495  | 1.963586  |
| C | 3.461880  | 0.218100  | 1.780726  |
| C | 1.519415  | 0.527958  | 3.346282  |
| C | 4.041182  | -0.282899 | 0.457672  |
| C | 5.578010  | -0.349767 | 0.444879  |
| C | 6.083717  | -1.584272 | 1.198954  |
| C | 6.137811  | -0.240274 | -0.993928 |
| C | 7.666055  | -0.148794 | -1.015233 |
| C | 5.655703  | -1.358491 | -1.924269 |
| H | -3.177883 | 0.183934  | 1.214393  |
| H | -1.386873 | 0.993108  | -1.931914 |
| H | -1.437928 | -1.500497 | 0.902846  |
| O | -0.325778 | 0.543395  | 1.226739  |
| H | -5.607243 | -2.175711 | -0.864616 |
| H | -5.658995 | -3.028103 | 0.680076  |
| H | -5.348180 | -0.929584 | 1.906402  |
| H | -3.378028 | -3.196883 | -0.317735 |
| H | -3.367188 | -2.338527 | 1.218277  |
| H | -2.911371 | 2.312074  | 0.302863  |
| H | -3.401286 | 1.843648  | -1.316583 |
| H | 1.630561  | -2.060570 | -1.116619 |
| H | 0.996728  | -2.083918 | 0.528134  |
| H | -0.781952 | -3.150448 | -0.772769 |
| H | -0.679707 | -1.904653 | -2.022842 |
| H | -0.454921 | 3.027856  | 1.193645  |
| H | 0.537379  | 4.054037  | 0.141131  |
| H | 1.868040  | 2.554810  | 1.533375  |
| H | 2.174753  | 2.229262  | -0.155445 |
| H | -3.080044 | -2.089964 | -2.415443 |
| H | -2.671091 | -0.383208 | -2.568396 |
| H | -4.324371 | -0.854495 | -2.204792 |
| H | 1.202146  | 1.452811  | -1.968874 |
| H | 0.802576  | -0.122825 | -2.636181 |
| H | 2.384736  | 0.149579  | -1.912123 |
| H | -5.312672 | 2.238671  | -0.669496 |
| H | -6.831736 | 1.363954  | -0.091970 |
| H | -7.445238 | -0.881702 | 0.034907  |
| H | 1.755780  | -1.056544 | 1.952317  |
| H | 3.950895  | -0.301236 | 2.614370  |
| H | 3.715220  | 1.280100  | 1.902642  |
| H | 2.079162  | 0.000313  | 4.126090  |
| H | 0.454337  | 0.355990  | 3.518877  |
| H | 1.715693  | 1.598879  | 3.473677  |
| H | 3.712873  | 0.386121  | -0.345145 |
| H | 3.628005  | -1.273896 | 0.227079  |

|   |          |           |           |
|---|----------|-----------|-----------|
| H | 5.946799 | 0.537973  | 0.981304  |
| H | 7.172250 | -1.576031 | 1.312552  |
| H | 5.655042 | -1.633118 | 2.205390  |
| H | 5.804927 | -2.509215 | 0.681200  |
| H | 5.748782 | 0.706766  | -1.395890 |
| H | 8.025426 | 0.114502  | -2.016261 |
| H | 8.030393 | 0.613944  | -0.317115 |
| H | 8.131033 | -1.102985 | -0.741971 |
| H | 6.037844 | -1.202171 | -2.939177 |
| H | 4.563092 | -1.398777 | -1.987184 |
| H | 6.010200 | -2.340637 | -1.590319 |

ωB97XD energy = -1358.20900976 a.u.

Swinhoeisterol F (**10**), Conf. O

|   |           |           |           |
|---|-----------|-----------|-----------|
| C | -4.439489 | -2.765240 | 0.109121  |
| C | -5.007309 | -1.775639 | 1.127772  |
| C | -4.726310 | -0.344555 | 0.694942  |
| C | -3.256848 | -0.063430 | 0.417621  |
| C | -2.629607 | -1.078455 | -0.587239 |
| C | -2.951401 | -2.512298 | -0.113027 |
| C | -2.978685 | 1.399938  | 0.035116  |
| C | -1.614504 | 1.615025  | -0.667637 |
| C | -0.589002 | 0.558498  | -0.301270 |
| C | -1.096486 | -0.886607 | -0.488751 |
| C | 0.809526  | 0.676270  | -0.957370 |
| C | 1.162121  | -0.795701 | -1.284292 |
| C | -0.200463 | -1.424059 | -1.613071 |
| C | -1.185428 | 3.063220  | -0.466874 |
| C | -0.190734 | 3.420569  | 0.614224  |
| C | 1.212264  | 2.799278  | 0.489310  |
| C | 1.226703  | 1.255557  | 0.440070  |
| C | -3.189103 | -0.883720 | -2.006446 |
| C | 1.002902  | 1.527398  | -2.206215 |
| C | -5.708326 | 0.557002  | 0.610920  |
| O | -6.373432 | -2.036747 | 1.399023  |
| O | -1.706972 | 3.934692  | -1.147668 |
| C | 2.446353  | 0.653181  | 1.147837  |
| C | 3.729590  | 1.036667  | 0.395772  |
| C | 2.487576  | 1.016180  | 2.635672  |
| C | 5.055348  | 0.458518  | 0.915059  |
| C | 5.286142  | -1.068585 | 0.824173  |
| C | 4.607430  | -1.839599 | 1.965947  |
| C | 4.946896  | -1.653181 | -0.565407 |
| C | 5.719554  | -0.949206 | -1.686564 |
| C | 5.211062  | -3.161167 | -0.637847 |
| H | -2.737233 | -0.254573 | 1.370328  |
| H | -1.773827 | 1.522009  | -1.745995 |
| H | -0.786193 | -1.392914 | 0.433581  |
| O | -0.013710 | 0.757414  | 1.017455  |
| H | -4.997602 | -2.669570 | -0.831858 |
| H | -4.599322 | -3.783035 | 0.479791  |
| H | -4.496684 | -1.939270 | 2.086202  |
| H | -2.550586 | -3.232658 | -0.835646 |
| H | -2.429288 | -2.694317 | 0.835938  |
| H | -3.040496 | 2.013072  | 0.940812  |
| H | -3.745879 | 1.772545  | -0.648063 |

|                                             |           |           |           |   |           |           |           |
|---------------------------------------------|-----------|-----------|-----------|---|-----------|-----------|-----------|
| H                                           | 1.882661  | -0.870300 | -2.104539 | C | 3.240220  | -0.943418 | 1.956509  |
| H                                           | 1.590298  | -1.318855 | -0.425114 | C | -0.988148 | 1.411245  | 2.247880  |
| H                                           | -0.166716 | -2.517249 | -1.647510 | C | 5.739437  | 0.623380  | -0.594787 |
| H                                           | -0.552806 | -1.072146 | -2.590818 | O | 6.428850  | -1.928273 | -1.495879 |
| H                                           | -0.625917 | 3.093968  | 1.565242  | O | 1.684197  | 3.881592  | 1.303233  |
| H                                           | -0.105783 | 4.510114  | 0.630703  | C | -2.431492 | 0.672695  | -1.142718 |
| H                                           | 1.772703  | 3.142534  | 1.362511  | C | -3.736811 | 1.172063  | -0.494822 |
| H                                           | 1.730546  | 3.208965  | -0.382614 | C | -2.371131 | 0.974456  | -2.644540 |
| H                                           | -4.282146 | -0.831220 | -1.994217 | C | -5.026108 | 0.472560  | -0.972677 |
| H                                           | -2.905519 | -1.722243 | -2.651409 | C | -5.613401 | -0.574188 | -0.008634 |
| H                                           | -2.832184 | 0.030242  | -2.486624 | C | -6.952650 | -1.083525 | -0.551174 |
| H                                           | 0.572624  | 2.529294  | -2.142851 | C | -4.622771 | -1.710086 | 0.332080  |
| H                                           | 0.546911  | 1.037266  | -3.073336 | C | -5.094762 | -2.556598 | 1.517647  |
| H                                           | 2.072068  | 1.642971  | -2.416244 | C | -4.278010 | -2.608478 | -0.859121 |
| H                                           | -5.535612 | 1.585646  | 0.314504  | H | 2.776549  | -0.191104 | -1.394000 |
| H                                           | -6.729007 | 0.293269  | 0.870836  | H | 1.793328  | 1.447227  | 1.788471  |
| H                                           | -6.856789 | -2.028630 | 0.563691  | H | 0.836670  | -1.389503 | -0.494110 |
| H                                           | 2.318146  | -0.430144 | 1.091301  | O | 0.034501  | 0.767242  | -1.001799 |
| H                                           | 3.828399  | 2.130349  | 0.419399  | H | 5.063265  | -2.663393 | 0.710843  |
| H                                           | 3.604751  | 0.770231  | -0.661285 | H | 4.674181  | -3.727439 | -0.644118 |
| H                                           | 3.163661  | 0.348694  | 3.176314  | H | 4.549886  | -1.822037 | -2.175652 |
| H                                           | 1.495911  | 0.916503  | 3.088498  | H | 2.622882  | -3.250433 | 0.696361  |
| H                                           | 2.840153  | 2.039877  | 2.804336  | H | 2.492595  | -2.650217 | -0.953099 |
| H                                           | 5.200530  | 0.764382  | 1.958743  | H | 3.046975  | 2.063262  | -0.879842 |
| H                                           | 5.855523  | 0.956106  | 0.354106  | H | 3.759343  | 1.773533  | 0.697579  |
| H                                           | 6.369804  | -1.209032 | 0.962956  | H | -1.836903 | -0.998638 | 2.049716  |
| H                                           | 3.526409  | -1.938032 | 1.820058  | H | -1.521657 | -1.376925 | 0.355074  |
| H                                           | 5.017641  | -2.849285 | 2.062801  | H | 0.239733  | -2.591429 | 1.549869  |
| H                                           | 4.771690  | -1.334663 | 2.923704  | H | 0.605431  | -1.171820 | 2.539262  |
| H                                           | 3.873759  | -1.497337 | -0.740500 | H | 0.640716  | 3.129717  | -1.457522 |
| H                                           | 5.479912  | -1.392996 | -2.659157 | H | 0.102432  | 4.509612  | -0.478861 |
| H                                           | 5.495412  | 0.119691  | -1.749752 | H | -1.756106 | 3.153091  | -1.268953 |
| H                                           | 6.801361  | -1.053281 | -1.532397 | H | -1.729509 | 3.160489  | 0.477223  |
| H                                           | 5.030725  | -3.534966 | -1.651810 | H | 2.975277  | -1.814543 | 2.565360  |
| H                                           | 4.567694  | -3.731446 | 0.038293  | H | 2.867624  | -0.058351 | 2.477166  |
| H                                           | 6.254560  | -3.387598 | -0.382655 | H | 4.332039  | -0.869349 | 1.943079  |
| $\omega$ B97XD energy = -1358.20894598 a.u. |           |           |           | H | -0.522157 | 0.898117  | 3.096184  |
| Swinhoeisterol F (10), Conf. P              |           |           |           | H | -2.058232 | 1.502524  | 2.464661  |
| C                                           | 4.504823  | -2.726992 | -0.232640 | H | -0.574136 | 2.421487  | 2.218680  |
| C                                           | 5.060770  | -1.691844 | -1.212283 | H | 5.557098  | 1.635973  | -0.252122 |
| C                                           | 4.766105  | -0.282689 | -0.720455 | H | 6.763256  | 0.380601  | -0.862621 |
| C                                           | 3.293356  | -0.028796 | -0.434486 | H | 6.914616  | -1.943680 | -0.662054 |
| C                                           | 2.678958  | -1.088018 | 0.531858  | H | -2.387349 | -0.415422 | -1.040671 |
| C                                           | 3.014658  | -2.498828 | 0.001175  | H | -3.824633 | 2.247350  | -0.689602 |
| C                                           | 2.996203  | 1.415395  | 0.002217  | H | -3.656286 | 1.070436  | 0.596540  |
| C                                           | 1.630946  | 1.584808  | 0.715420  | H | -2.546503 | 2.034116  | -2.861048 |
| C                                           | 0.615866  | 0.532577  | 0.308168  | H | -3.131285 | 0.403938  | -3.186769 |
| C                                           | 1.143670  | -0.910885 | 0.443941  | H | -1.396282 | 0.697702  | -3.056455 |
| C                                           | -0.784385 | 0.609937  | 0.968279  | H | -4.864754 | 0.005053  | -1.951758 |
| C                                           | -1.112461 | -0.879087 | 1.238320  | H | -5.800596 | 1.230959  | -1.137399 |
| C                                           | 0.257974  | -1.497256 | 1.550809  | H | -5.816693 | -0.053207 | 0.939587  |
| C                                           | 1.184983  | 3.034028  | 0.577120  | H | -7.411529 | -1.820422 | 0.115837  |
| C                                           | 0.197511  | 3.420975  | -0.498801 | H | -7.663091 | -0.257110 | -0.664584 |
| C                                           | -1.200363 | 2.783792  | -0.403240 | H | -6.832561 | -1.550440 | -1.535713 |
| C                                           | -1.208617 | 1.238128  | -0.407419 | H | -3.697992 | -1.219726 | 0.652058  |
|                                             |           |           |           | H | -4.311132 | -3.257280 | 1.827514  |

|   |           |           |           |
|---|-----------|-----------|-----------|
| H | -5.342645 | -1.928880 | 2.381620  |
| H | -5.982248 | -3.149922 | 1.268429  |
| H | -3.475561 | -3.305337 | -0.591680 |
| H | -3.939901 | -2.035789 | -1.729071 |
| H | -5.140759 | -3.209396 | -1.169588 |

ωB97XD energy = -1358.20883026 a.u.

Swinhoeisterol F (**10**), Conf. Q

|   |           |           |           |
|---|-----------|-----------|-----------|
| C | -4.980333 | -2.466811 | 0.089695  |
| C | -5.436018 | -1.375992 | 1.053027  |
| C | -4.990438 | -0.016807 | 0.540436  |
| C | -3.485071 | 0.085052  | 0.358133  |
| C | -2.939262 | -1.040301 | -0.578602 |
| C | -3.464497 | -2.406917 | -0.082838 |
| C | -3.009235 | 1.487095  | -0.057303 |
| C | -1.586588 | 1.505039  | -0.672744 |
| C | -0.731989 | 0.339511  | -0.211519 |
| C | -1.401337 | -1.036592 | -0.399490 |
| C | 0.709671  | 0.260343  | -0.772200 |
| C | 0.893738  | -1.250143 | -1.061106 |
| C | -0.518092 | -1.709607 | -1.458916 |
| C | -0.979646 | 2.890262  | -0.482347 |
| C | -0.006809 | 3.156027  | 0.646958  |
| C | 1.301248  | 2.343760  | 0.660565  |
| C | 1.104476  | 0.814046  | 0.641698  |
| C | -3.396035 | -0.828499 | -2.030957 |
| C | 1.090753  | 1.054378  | -2.015982 |
| C | -5.870207 | 0.954159  | 0.282588  |
| O | -6.835765 | -1.503527 | 1.229008  |
| O | -1.345874 | 3.800794  | -1.211543 |
| C | 2.182958  | 0.070846  | 1.435285  |
| C | 3.539411  | 0.214590  | 0.731304  |
| C | 2.213694  | 0.480814  | 2.912327  |
| C | 4.617941  | -0.723507 | 1.271288  |
| C | 6.020804  | -0.570553 | 0.656195  |
| C | 6.999513  | -1.473591 | 1.418163  |
| C | 6.126866  | -0.834445 | -0.872663 |
| C | 5.314430  | -2.047795 | -1.336186 |
| C | 5.814245  | 0.395112  | -1.734961 |
| H | -3.042670 | -0.128556 | 1.343979  |
| H | -1.689933 | 1.396582  | -1.756765 |
| H | -1.206155 | -1.551410 | 0.549544  |
| O | -0.227549 | 0.507783  | 1.140594  |
| H | -5.499403 | -2.335508 | -0.866961 |
| H | -5.274964 | -3.442006 | 0.490874  |
| H | -4.930790 | -1.546624 | 2.018257  |
| H | -3.134442 | -3.191863 | -0.773011 |
| H | -3.001884 | -2.627358 | 0.888434  |
| H | -3.053976 | 2.142979  | 0.819216  |
| H | -3.681142 | 1.917842  | -0.803388 |
| H | 1.637579  | -1.424611 | -1.844655 |
| H | 1.212792  | -1.808830 | -0.177320 |
| H | -0.624387 | -2.798568 | -1.473097 |
| H | -0.764605 | -1.339499 | -2.461863 |
| H | -0.546266 | 2.946134  | 1.577890  |
| H | 0.227463  | 4.223269  | 0.623003  |

|   |           |           |           |
|---|-----------|-----------|-----------|
| H | 1.825021  | 2.632603  | 1.575306  |
| H | 1.948765  | 2.647675  | -0.167529 |
| H | -3.157083 | -1.706280 | -2.640575 |
| H | -2.928480 | 0.036643  | -2.506891 |
| H | -4.478253 | -0.674981 | -2.082721 |
| H | 0.606442  | 0.626317  | -2.900422 |
| H | 2.173557  | 0.999842  | -2.175373 |
| H | 0.820528  | 2.112001  | -1.981837 |
| H | -5.574374 | 1.932600  | -0.079960 |
| H | -6.934933 | 0.791840  | 0.420851  |
| H | -7.115921 | -0.907798 | 1.933357  |
| H | 1.905247  | -0.988579 | 1.412649  |
| H | 3.887682  | 1.254333  | 0.807996  |
| H | 3.386262  | 0.014714  | -0.333783 |
| H | 2.724914  | 1.437425  | 3.066999  |
| H | 2.738538  | -0.268993 | 3.511471  |
| H | 1.198579  | 0.566867  | 3.313671  |
| H | 4.280052  | -1.762934 | 1.153771  |
| H | 4.721571  | -0.560423 | 2.351207  |
| H | 6.338235  | 0.469120  | 0.824314  |
| H | 8.031756  | -1.304335 | 1.092747  |
| H | 6.954892  | -1.285966 | 2.496768  |
| H | 6.769204  | -2.534147 | 1.257862  |
| H | 7.184200  | -1.069201 | -1.059049 |
| H | 5.537915  | -2.280534 | -2.383232 |
| H | 5.540823  | -2.941304 | -0.744176 |
| H | 4.236262  | -1.863277 | -1.265228 |
| H | 6.049072  | 0.194045  | -2.786678 |
| H | 6.410593  | 1.259594  | -1.421663 |
| H | 4.760075  | 0.683905  | -1.687572 |

ωB97XD energy = -1358.20876856 a.u.

Lobatolide A (**11**), Conf. A

|   |           |           |           |
|---|-----------|-----------|-----------|
| C | 1.637593  | -2.040734 | -0.760667 |
| C | 2.644251  | -1.545789 | -1.744379 |
| C | 2.595649  | 0.005665  | -1.750361 |
| C | 2.484004  | 0.638134  | -0.354668 |
| C | 1.067163  | 1.142653  | 0.061399  |
| C | 0.408171  | 0.458193  | 1.291841  |
| C | -0.734934 | -0.532420 | 0.966266  |
| C | -0.388424 | -1.828599 | 0.226204  |
| O | 0.410062  | -1.506688 | -0.925566 |
| C | 0.531801  | -2.725493 | 1.076651  |
| C | 1.768144  | -2.819062 | 0.340243  |
| O | 3.349467  | 1.806155  | -0.337621 |
| C | 2.713176  | 2.931789  | 0.009344  |
| C | 1.288913  | 2.618358  | 0.286103  |
| C | -1.621514 | -2.602819 | -0.213969 |
| C | 4.044041  | -2.082233 | -1.449607 |
| O | 0.199822  | -3.217449 | 2.146126  |
| O | 3.279588  | 4.000915  | 0.067075  |
| C | 0.417383  | 3.553655  | 0.656499  |
| O | 1.401486  | -0.140345 | 2.095257  |
| O | -1.695855 | 0.173982  | 0.171608  |
| C | -2.707121 | 0.811358  | 0.796237  |

|   |           |           |           |
|---|-----------|-----------|-----------|
| O | -2.813137 | 0.857849  | 2.003473  |
| C | -3.651331 | 1.433831  | -0.196221 |
| C | -4.238116 | 0.418597  | -1.195016 |
| C | -4.988663 | -0.700117 | -0.469727 |
| C | -5.148318 | 1.135704  | -2.192067 |
| H | 2.333246  | -1.887532 | -2.739262 |
| H | 3.524938  | 0.359402  | -2.205158 |
| H | 1.774941  | 0.355641  | -2.382696 |
| H | 2.891923  | -0.028021 | 0.407924  |
| H | 0.383640  | 1.021857  | -0.782357 |
| H | -0.088266 | 1.253778  | 1.860018  |
| H | -1.202388 | -0.824033 | 1.912845  |
| H | 2.662916  | -3.325343 | 0.669650  |
| H | -1.318994 | -3.523155 | -0.720864 |
| H | -2.215989 | -2.869657 | 0.664009  |
| H | -2.230766 | -2.003975 | -0.893190 |
| H | 4.418207  | -1.715770 | -0.487466 |
| H | 4.737809  | -1.753018 | -2.227536 |
| H | 4.056507  | -3.176063 | -1.428105 |
| H | 0.737553  | 4.585213  | 0.771780  |
| H | -0.625943 | 3.323419  | 0.856223  |
| H | 1.044454  | -0.301833 | 2.976615  |
| H | -4.449722 | 1.920470  | 0.370857  |
| H | -3.099226 | 2.208921  | -0.741310 |
| H | -3.402013 | -0.025657 | -1.748419 |
| H | -5.379373 | -1.430458 | -1.186063 |
| H | -4.343970 | -1.240356 | 0.232690  |
| H | -5.835817 | -0.295478 | 0.096881  |
| H | -4.609417 | 1.918715  | -2.736750 |
| H | -5.998145 | 1.604456  | -1.681118 |
| H | -5.548777 | 0.429089  | -2.926645 |

ωB97XD energy = -1304.08193562 a.u.

Lobatolide A (**11**), Conf. B

|   |           |           |           |
|---|-----------|-----------|-----------|
| C | -2.535592 | -1.166438 | 0.843882  |
| C | -3.197363 | -0.117145 | 1.671686  |
| C | -2.349015 | 1.177986  | 1.562161  |
| C | -1.862105 | 1.485996  | 0.137116  |
| C | -0.357637 | 1.193210  | -0.160491 |
| C | -0.049274 | 0.109677  | -1.231071 |
| C | 0.382837  | -1.275462 | -0.694485 |
| C | -0.634438 | -2.123963 | 0.076141  |
| O | -1.221889 | -1.313638 | 1.108379  |
| C | -1.829630 | -2.516125 | -0.813340 |
| C | -2.980536 | -1.887627 | -0.212976 |
| O | -2.050573 | 2.909737  | -0.086766 |
| C | -0.933199 | 3.536718  | -0.473607 |
| C | 0.171767  | 2.549446  | -0.561912 |
| C | -0.008193 | -3.359826 | 0.703327  |
| C | -4.652715 | 0.104272  | 1.264321  |
| O | -1.732993 | 3.219616  | -1.809345 |
| O | -0.906573 | 4.726293  | -0.700497 |
| C | 1.399011  | 2.901840  | -0.937734 |
| O | -1.136760 | 0.012836  | -2.123483 |
| O | 1.505414  | -1.030029 | 0.159128  |
| C | 2.724671  | -1.487462 | -0.201265 |

|   |           |           |           |
|---|-----------|-----------|-----------|
| O | 2.927253  | -2.105553 | -1.223616 |
| C | 3.757603  | -1.108602 | 0.824015  |
| C | 4.032417  | 0.409463  | 0.859724  |
| C | 4.954322  | 0.741269  | 2.033084  |
| C | 4.627748  | 0.896302  | -0.462588 |
| H | -3.163400 | -0.445787 | 2.717484  |
| H | -2.978930 | 2.010050  | 1.888252  |
| H | -1.497154 | 1.130264  | 2.245848  |
| H | -2.497890 | 0.997233  | -0.603444 |
| H | 0.137155  | 0.886086  | 0.764078  |
| H | 0.840685  | 0.459301  | -1.770713 |
| H | 0.706393  | -1.878235 | -1.549622 |
| H | -3.985887 | -1.902208 | -0.606307 |
| H | 0.441708  | -3.980218 | -0.076085 |
| H | 0.758590  | -3.075968 | 1.427048  |
| H | -0.776630 | -3.945057 | 1.215545  |
| H | -4.727230 | 0.500636  | 0.246056  |
| H | -5.119794 | 0.824736  | 1.941031  |
| H | -5.226454 | -0.825970 | 1.313626  |
| H | 1.616438  | 3.936048  | -1.188927 |
| H | 2.210170  | 2.182879  | -1.005798 |
| H | -0.864901 | -0.474556 | -2.910409 |
| H | 3.397095  | -1.437866 | 1.804411  |
| H | 4.676850  | -1.652098 | 0.589295  |
| H | 3.074820  | 0.919852  | 1.024105  |
| H | 4.514708  | 0.427991  | 2.985933  |
| H | 5.922278  | 0.237254  | 1.924271  |
| H | 5.141723  | 1.818702  | 2.085853  |
| H | 4.789802  | 1.978969  | -0.440230 |
| H | 3.979640  | 0.671216  | -1.317408 |
| H | 5.595099  | 0.415332  | -0.650210 |

ωB97XD energy = -1304.08181714 a.u.

Lobatolide A (**11**), Conf. C

|   |           |           |           |
|---|-----------|-----------|-----------|
| C | -2.194545 | -1.390938 | 0.994477  |
| C | -2.784671 | -0.409296 | 1.949109  |
| C | -2.034860 | 0.934445  | 1.753390  |
| C | -1.825757 | 1.327418  | 0.281739  |
| C | -0.378647 | 1.179734  | -0.286463 |
| C | -0.155847 | 0.115148  | -1.393044 |
| C | 0.463604  | -1.234896 | -0.951146 |
| C | -0.372250 | -2.182960 | -0.086470 |
| O | -0.848651 | -1.447658 | 1.051962  |
| C | -1.658767 | -2.636890 | -0.802462 |
| C | -2.745378 | -2.113382 | -0.010179 |
| O | -2.164635 | 2.736172  | 0.164707  |
| C | -1.213841 | 3.459953  | -0.437645 |
| C | -0.077400 | 2.572771  | -0.789441 |
| C | 0.419185  | -3.392408 | 0.389132  |
| C | -4.295167 | -0.265686 | 1.773058  |
| O | -1.667056 | -3.308962 | -1.824381 |
| O | -1.336109 | 4.649557  | -0.630975 |
| C | 0.987509  | 3.029739  | -1.444660 |
| O | -1.359417 | -0.075991 | -2.104685 |
| O | 1.659402  | -0.962621 | -0.209111 |
| C | 2.811937  | -0.764943 | -0.874949 |



|   |           |           |           |
|---|-----------|-----------|-----------|
| O | 2.874916  | -0.719341 | -2.086004 |
| C | 3.988601  | -0.671420 | 0.061039  |
| C | 3.748158  | 0.098780  | 1.368397  |
| C | 4.981848  | -0.013272 | 2.265119  |
| C | 3.402405  | 1.562753  | 1.092203  |
| H | -2.573066 | -0.759632 | 2.966470  |
| H | -2.633539 | 1.716432  | 2.227989  |
| H | -1.071814 | 0.905609  | 2.269811  |
| H | -2.535185 | 0.810247  | -0.367575 |
| H | 0.306136  | 0.947756  | 0.535062  |
| H | 0.602339  | 0.531238  | -2.066293 |
| H | 0.725731  | -1.783205 | -1.863301 |
| H | -3.796014 | -2.194119 | -0.245269 |
| H | 0.777613  | -3.958108 | -0.474968 |
| H | 1.272180  | -3.080514 | 0.994547  |
| H | -0.224191 | -4.042119 | 0.988645  |
| H | -4.545209 | 0.141540  | 0.787657  |
| H | -4.690886 | 0.417774  | 2.529152  |
| H | -4.804342 | -1.227271 | 1.886799  |
| H | 1.042644  | 4.076688  | -1.728937 |
| H | 1.822005  | 2.390305  | -1.718591 |
| H | -1.168633 | -0.493056 | -2.953237 |
| H | 4.266333  | -1.709280 | 0.289203  |
| H | 4.817195  | -0.231797 | -0.502116 |
| H | 2.901744  | -0.367077 | 1.885972  |
| H | 5.216294  | -1.058953 | 2.492405  |
| H | 5.859937  | 0.432543  | 1.782160  |
| H | 4.821623  | 0.508784  | 3.214177  |
| H | 3.217155  | 2.102900  | 2.026541  |
| H | 2.504144  | 1.659865  | 0.474037  |
| H | 4.225504  | 2.066293  | 0.570328  |

ωB97XD energy = -1304.08172550 a.u.

Lobatolide A (**11**), Conf. D

|   |           |           |           |
|---|-----------|-----------|-----------|
| C | 1.912091  | -1.965695 | -0.722768 |
| C | 2.940851  | -1.403546 | -1.645641 |
| C | 2.760940  | 0.137420  | -1.685979 |
| C | 2.517233  | 0.777435  | -0.310094 |
| C | 1.044586  | 1.182429  | 0.010754  |
| C | 0.357810  | 0.457784  | 1.202290  |
| C | -0.680081 | -0.624477 | 0.819024  |
| C | -0.185990 | -1.896788 | 0.124889  |
| O | 0.662065  | -1.526479 | -0.975434 |
| C | 0.740077  | -2.711790 | 1.048351  |
| C | 2.026235  | -2.720831 | 0.395972  |
| O | 3.294521  | 2.004496  | -0.257286 |
| C | 2.562377  | 3.082432  | 0.050553  |
| C | 1.148950  | 2.670763  | 0.239374  |
| C | -1.321429 | -2.769079 | -0.388038 |
| C | 4.357600  | -1.810447 | -1.243415 |
| O | 0.375713  | -3.214753 | 2.102030  |
| O | 3.049252  | 4.187743  | 0.141868  |
| C | 0.192467  | 3.543607  | 0.547338  |
| O | 1.338479  | -0.052911 | 2.078871  |
| O | -1.643003 | -0.006889 | -0.046771 |
| C | -2.703878 | 0.605784  | 0.515610  |

|   |           |           |           |
|---|-----------|-----------|-----------|
| O | -2.866700 | 0.676486  | 1.715891  |
| C | -3.646715 | 1.161112  | -0.516489 |
| C | -5.021720 | 0.465984  | -0.464607 |
| C | -5.968995 | 1.122372  | -1.468975 |
| C | -4.893389 | -1.036275 | -0.725714 |
| H | 2.731241  | -1.786050 | -2.651736 |
| H | 3.681400  | 0.562911  | -2.095164 |
| H | 1.951204  | 0.406110  | -2.369864 |
| H | 2.921793  | 0.151123  | 0.487413  |
| H | 0.426940  | 1.011937  | -0.874149 |
| H | -0.236929 | 1.216523  | 1.724503  |
| H | -1.182158 | -0.942622 | 1.738964  |
| H | 2.931127  | -3.155653 | 0.792683  |
| H | -1.960934 | -3.065939 | 0.447558  |
| H | -1.918452 | -2.229393 | -1.125066 |
| H | -0.912429 | -3.671406 | -0.850725 |
| H | 4.630191  | -1.391950 | -0.268815 |
| H | 5.072607  | -1.438485 | -1.982054 |
| H | 4.463801  | -2.898074 | -1.191519 |
| H | 0.429595  | 4.595559  | 0.677291  |
| H | -0.842392 | 3.238777  | 0.680901  |
| H | 0.935684  | -0.236730 | 2.935855  |
| H | -3.768401 | 2.228766  | -0.304990 |
| H | -3.206683 | 1.053287  | -1.512208 |
| H | -5.429022 | 0.610413  | 0.543377  |
| H | -6.083377 | 2.193658  | -1.271478 |
| H | -5.594604 | 1.005010  | -2.493268 |
| H | -6.961927 | 0.663788  | -1.420290 |
| H | -4.442504 | -1.224163 | -1.707802 |
| H | -5.876748 | -1.517116 | -0.709340 |
| H | -4.275743 | -1.530983 | 0.031959  |

ωB97XD energy = -1304.08159898 a.u.

Lobatolide A (**11**), Conf. E

|   |           |           |           |
|---|-----------|-----------|-----------|
| C | 2.583889  | -1.384464 | -0.748157 |
| C | 3.402902  | -0.441230 | -1.563654 |
| C | 2.699288  | 0.942638  | -1.548665 |
| C | 2.152968  | 1.351950  | -0.172154 |
| C | 0.612583  | 1.200328  | 0.025616  |
| C | 0.141695  | 0.214251  | 1.131631  |
| C | -0.403741 | -1.142993 | 0.630070  |
| C | 0.551103  | -2.114149 | -0.070285 |
| O | 1.279127  | -1.405926 | -1.088596 |
| C | 1.647167  | -2.603241 | 0.896247  |
| C | 2.889283  | -2.112608 | 0.352690  |
| O | 2.448840  | 2.761951  | 0.017721  |
| C | 1.363993  | 3.498044  | 0.290030  |
| C | 0.170348  | 2.615850  | 0.304050  |
| C | -0.175070 | -3.293400 | -0.698046 |
| C | 4.847206  | -0.362934 | -1.072346 |
| O | 1.420888  | -3.264286 | 1.900198  |
| O | 1.426925  | 4.692627  | 0.480288  |
| C | -1.057341 | 3.085146  | 0.513885  |
| O | 1.168268  | 0.046781  | 2.084398  |
| O | -1.475424 | -0.837336 | -0.271679 |
| C | -2.741678 | -0.911542 | 0.191636  |

|   |           |           |           |
|---|-----------|-----------|-----------|
| O | -3.010905 | -1.215283 | 1.333352  |
| C | -3.736862 | -0.605562 | -0.895506 |
| C | -5.059855 | -0.028597 | -0.379163 |
| C | -4.849945 | 1.341786  | 0.269577  |
| C | -6.070273 | 0.057683  | -1.524092 |
| H | 3.396022  | -0.803372 | -2.598784 |
| H | 3.438426  | 1.688531  | -1.852843 |
| H | 1.895019  | 0.964943  | -2.288926 |
| H | 2.692738  | 0.840609  | 0.626722  |
| H | 0.160548  | 0.876208  | -0.914437 |
| H | -0.729813 | 0.679977  | 1.609924  |
| H | -0.808901 | -1.676683 | 1.495941  |
| H | 3.863142  | -2.219499 | 0.805943  |
| H | -0.726634 | -3.835587 | 0.074933  |
| H | -0.873239 | -2.951335 | -1.464479 |
| H | 0.548345  | -3.975823 | -1.152361 |
| H | 4.903632  | 0.057343  | -0.062502 |
| H | 5.429240  | 0.281272  | -1.736816 |
| H | 5.320857  | -1.348937 | -1.060466 |
| H | -1.218269 | 4.143867  | 0.695062  |
| H | -1.927397 | 2.433422  | 0.508535  |
| H | 0.802767  | -0.359892 | 2.879218  |
| H | -3.272723 | 0.067468  | -1.624484 |
| H | -3.913914 | -1.557063 | -1.414950 |
| H | -5.451130 | -0.715867 | 0.379945  |
| H | -4.153875 | 1.287683  | 1.113220  |
| H | -4.454971 | 2.059898  | -0.460259 |
| H | -5.795598 | 1.741457  | 0.650328  |
| H | -5.716113 | 0.737822  | -2.308573 |
| H | -7.032675 | 0.436472  | -1.164420 |
| H | -6.243193 | -0.922876 | -1.981104 |

ωB97XD energy = -1304.08140712 a.u.

Lobatolide A (**11**), Conf. F

|   |           |           |           |
|---|-----------|-----------|-----------|
| C | 2.538565  | -1.081658 | -0.924923 |
| C | 3.095503  | 0.013309  | -1.770333 |
| C | 2.171297  | 1.248810  | -1.608036 |
| C | 1.749442  | 1.528116  | -0.156531 |
| C | 0.284296  | 1.149060  | 0.227877  |
| C | 0.092350  | 0.024210  | 1.280115  |
| C | -0.293209 | -1.375381 | 0.740408  |
| C | 0.734314  | -2.156321 | -0.083406 |
| O | 1.224674  | -1.302968 | -1.130714 |
| C | 1.990833  | -2.487955 | 0.745227  |
| C | 3.074136  | -1.786797 | 0.100049  |
| O | 1.865260  | 2.961555  | 0.056591  |
| C | 0.750478  | 3.514780  | 0.549307  |
| C | -0.282843 | 2.462807  | 0.712391  |
| C | 0.157844  | -3.423555 | -0.696672 |
| C | 4.550888  | 0.324255  | -1.428067 |
| O | 1.982826  | -3.212059 | 1.730871  |
| O | 0.674187  | 4.697677  | 0.799120  |
| C | -1.488232 | 2.733211  | 1.208408  |
| O | 1.233354  | -0.039506 | 2.108684  |
| O | -1.466318 | -1.240395 | -0.075948 |
| C | -2.670378 | -1.264729 | 0.528268  |

|   |           |           |           |
|---|-----------|-----------|-----------|
| O | -2.800286 | -1.308733 | 1.734478  |
| C | -3.808412 | -1.223890 | -0.454518 |
| C | -4.375426 | 0.199050  | -0.659169 |
| C | -3.412165 | 1.082382  | -1.453517 |
| C | -5.732840 | 0.111387  | -1.358616 |
| H | 3.033738  | -0.307891 | -2.817217 |
| H | 2.721368  | 2.120926  | -1.971581 |
| H | 1.285053  | 1.140624  | -2.238856 |
| H | 2.452613  | 1.078924  | 0.547910  |
| H | -0.253108 | 0.847317  | -0.675821 |
| H | -0.778556 | 0.313866  | 1.879721  |
| H | -0.539528 | -1.997546 | 1.608479  |
| H | 4.096313  | -1.746837 | 0.445318  |
| H | -0.217033 | -4.077168 | 0.095458  |
| H | -0.657539 | -3.182643 | -1.380864 |
| H | 0.939545  | -3.956055 | -1.245399 |
| H | 4.647685  | 0.718887  | -0.411013 |
| H | 4.939406  | 1.076515  | -2.119692 |
| H | 5.180140  | -0.566754 | -1.511392 |
| H | -1.739557 | 3.747374  | 1.505382  |
| H | -2.247626 | 1.966668  | 1.336274  |
| H | 1.014497  | -0.513076 | 2.920008  |
| H | -3.484321 | -1.634378 | -1.415813 |
| H | -4.589954 | -1.868954 | -0.043637 |
| H | -4.529905 | 0.644921  | 0.332083  |
| H | -2.432657 | 1.160426  | -0.974676 |
| H | -3.258447 | 0.674944  | -2.460100 |
| H | -3.812491 | 2.096270  | -1.556085 |
| H | -5.632987 | -0.361305 | -2.343355 |
| H | -6.157850 | 1.109523  | -1.507491 |
| H | -6.447019 | -0.475675 | -0.771886 |

ωB97XD energy = -1304.08114554 a.u.

Lobatolide A (**11**), Conf. G

|   |           |           |           |
|---|-----------|-----------|-----------|
| C | 2.568470  | -1.094874 | -0.781719 |
| C | 3.181553  | -0.014547 | -1.606019 |
| C | 2.230410  | 1.209176  | -1.540151 |
| C | 1.707790  | 1.517045  | -0.127171 |
| C | 0.213737  | 1.166594  | 0.164603  |
| C | -0.065991 | 0.047987  | 1.203069  |
| C | -0.388842 | -1.364707 | 0.657523  |
| C | 0.709036  | -2.157185 | -0.056218 |
| O | 1.275611  | -1.328413 | -1.083149 |
| C | 1.896086  | -2.456595 | 0.879383  |
| C | 3.024235  | -1.767451 | 0.302307  |
| O | 1.833932  | 2.952048  | 0.069796  |
| C | 0.703992  | 3.527854  | 0.495973  |
| C | -0.352172 | 2.493083  | 0.618632  |
| C | 0.192248  | -3.446562 | -0.676893 |
| C | 4.602215  | 0.321061  | -1.156220 |
| O | 1.811932  | -3.151470 | 1.882461  |
| O | 0.632249  | 4.715048  | 0.726152  |
| C | -1.569309 | 2.792465  | 1.066547  |
| O | 0.991102  | 0.012930  | 2.137387  |
| O | -1.485473 | -1.249559 | -0.258744 |
| C | -2.740287 | -1.385604 | 0.219054  |

|   |           |           |           |
|---|-----------|-----------|-----------|
| O | -2.983692 | -1.489479 | 1.403432  |
| C | -3.763660 | -1.391901 | -0.885628 |
| C | -4.312384 | 0.008402  | -1.249217 |
| C | -5.026389 | 0.672219  | -0.070430 |
| C | -3.236568 | 0.923306  | -1.837014 |
| H | 3.206180  | -0.358555 | -2.647047 |
| H | 2.789722  | 2.081579  | -1.888166 |
| H | 1.391247  | 1.068705  | -2.226466 |
| H | 2.351697  | 1.070276  | 0.633121  |
| H | -0.276616 | 0.876974  | -0.769814 |
| H | -0.994675 | 0.334029  | 1.711387  |
| H | -0.705260 | -1.972270 | 1.512837  |
| H | 4.015309  | -1.709538 | 0.726673  |
| H | -0.233973 | -4.083767 | 0.102532  |
| H | -0.571559 | -3.233002 | -1.426325 |
| H | 1.017980  | -3.983107 | -1.152221 |
| H | 4.613192  | 0.732973  | -0.141486 |
| H | 5.035438  | 1.067399  | -1.827456 |
| H | 5.247096  | -0.562682 | -1.173930 |
| H | -1.807997 | 3.814708  | 1.345786  |
| H | -2.351683 | 2.046237  | 1.170039  |
| H | 0.707816  | -0.465969 | 2.925414  |
| H | -3.319026 | -1.846344 | -1.775137 |
| H | -4.588697 | -2.022398 | -0.543941 |
| H | -5.057810 | -0.177125 | -2.031985 |
| H | -5.821241 | 0.033088  | 0.327768  |
| H | -4.333158 | 0.886234  | 0.750921  |
| H | -5.476054 | 1.620593  | -0.382008 |
| H | -2.493454 | 1.201997  | -1.083405 |
| H | -3.685729 | 1.849515  | -2.210204 |
| H | -2.709077 | 0.443007  | -2.668005 |

ωB97XD energy = -1304.08056237 a.u.

#### Lobatolide A (11), Conf. H

|   |           |           |           |
|---|-----------|-----------|-----------|
| C | 1.894860  | -2.008747 | -0.593143 |
| C | 2.991068  | -1.495014 | -1.465568 |
| C | 2.850728  | 0.047641  | -1.563808 |
| C | 2.522935  | 0.736021  | -0.229756 |
| C | 1.035590  | 1.161084  | -0.028031 |
| C | 0.266197  | 0.494891  | 1.147346  |
| C | -0.770433 | -0.578181 | 0.732880  |
| C | -0.252267 | -1.880732 | 0.116149  |
| O | 0.671047  | -1.560173 | -0.939526 |
| C | 0.600832  | -2.676907 | 1.123521  |
| C | 1.925182  | -2.728067 | 0.553932  |
| O | 3.304988  | 1.959648  | -0.165620 |
| C | 2.560435  | 3.053858  | 0.039157  |
| C | 1.133162  | 2.657451  | 0.134359  |
| C | -1.362590 | -2.756365 | -0.442731 |
| C | 4.371062  | -1.916519 | -0.963939 |
| O | 0.162543  | -3.139968 | 2.167193  |
| O | 3.048173  | 4.159514  | 0.121327  |
| C | 0.158002  | 3.543970  | 0.319789  |
| O | 1.181348  | -0.007778 | 2.096593  |
| O | -1.659883 | 0.027981  | -0.215832 |
| C | -2.694827 | 0.755034  | 0.255503  |

|   |           |           |           |
|---|-----------|-----------|-----------|
| O | -2.907381 | 0.904067  | 1.440959  |
| C | -3.527585 | 1.327335  | -0.860050 |
| C | -4.845668 | 0.549709  | -1.093168 |
| C | -4.584884 | -0.921446 | -1.421115 |
| C | -5.824974 | 0.694284  | 0.072435  |
| H | 2.836329  | -1.905130 | -2.470822 |
| H | 3.807872  | 0.440763  | -1.917797 |
| H | 2.098010  | 0.312756  | -2.311412 |
| H | 2.866098  | 0.135637  | 0.615095  |
| H | 0.479062  | 0.949497  | -0.943682 |
| H | -0.338457 | 1.283382  | 1.609775  |
| H | -1.337846 | -0.857112 | 1.627506  |
| H | 2.796682  | -3.164054 | 1.018581  |
| H | -1.884345 | -2.242426 | -1.251267 |
| H | -0.939465 | -3.688308 | -0.827791 |
| H | -2.075157 | -2.998288 | 0.350241  |
| H | 4.448953  | -3.002992 | -0.863572 |
| H | 4.595167  | -1.464602 | 0.008051  |
| H | 5.135498  | -1.588010 | -1.672940 |
| H | 0.385431  | 4.601520  | 0.416899  |
| H | -0.884444 | 3.241874  | 0.382607  |
| H | 0.725863  | -0.147102 | 2.935280  |
| H | -3.761304 | 2.362620  | -0.594054 |
| H | -2.936457 | 1.327299  | -1.779264 |
| H | -5.299027 | 1.018800  | -1.974702 |
| H | -5.517028 | -1.424225 | -1.698431 |
| H | -3.881400 | -1.029554 | -2.253615 |
| H | -4.169471 | -1.452075 | -0.555944 |
| H | -6.026515 | 1.747583  | 0.294500  |
| H | -5.434316 | 0.228906  | 0.983457  |
| H | -6.777347 | 0.211110  | -0.170016 |

ωB97XD energy = -1304.08015527 a.u.

#### Lobatolide A (11), Conf. I

|   |           |           |           |
|---|-----------|-----------|-----------|
| C | -2.227404 | -1.337566 | 0.846592  |
| C | -2.837416 | -0.347085 | 1.778669  |
| C | -2.011029 | 0.959637  | 1.660293  |
| C | -1.703499 | 1.374379  | 0.211591  |
| C | -0.233018 | 1.193857  | -0.284412 |
| C | 0.028419  | 0.119396  | -1.371846 |
| C | 0.562115  | -1.258173 | -0.902006 |
| C | -0.368320 | -2.188691 | -0.118752 |
| O | -0.893125 | -1.454947 | 0.998440  |
| C | -1.618655 | -2.577638 | -0.930683 |
| C | -2.735687 | -2.017512 | -0.208746 |
| O | -1.992274 | 2.795548  | 0.109476  |
| C | -1.002847 | 3.495902  | -0.456738 |
| C | 0.116370  | 2.578302  | -0.783846 |
| C | 0.342867  | -3.434515 | 0.387809  |
| C | -4.324279 | -0.131357 | 1.506664  |
| O | -1.582840 | -3.235717 | -1.961181 |
| O | -1.083924 | 4.690469  | -0.641083 |
| C | 1.202552  | 3.009760  | -1.421178 |
| O | -1.125719 | -0.018780 | -2.171999 |
| O | 1.707261  | -1.047447 | -0.065937 |
| C | 2.916658  | -0.896846 | -0.635965 |

|   |           |           |           |
|---|-----------|-----------|-----------|
| O | 3.071176  | -0.824873 | -1.837731 |
| C | 4.025890  | -0.870856 | 0.385023  |
| C | 3.899322  | 0.169533  | 1.519898  |
| C | 3.646263  | 1.571727  | 0.965135  |
| C | 2.869413  | -0.197912 | 2.590919  |
| H | -2.710312 | -0.725551 | 2.800146  |
| H | -2.592762 | 1.761731  | 2.122299  |
| H | -1.080815 | 0.865941  | 2.226562  |
| H | -2.391944 | 0.894209  | -0.487191 |
| H | 0.408689  | 0.958796  | 0.571269  |
| H | 0.851731  | 0.506506  | -1.982817 |
| H | 0.873583  | -1.802672 | -1.800796 |
| H | -3.769322 | -2.046412 | -0.519167 |
| H | 0.760733  | -3.987878 | -0.457356 |
| H | 1.146887  | -3.162392 | 1.073886  |
| H | -0.367791 | -4.080894 | 0.910017  |
| H | -4.738716 | 0.557179  | 2.247945  |
| H | -4.880029 | -1.071687 | 1.570325  |
| H | -4.492367 | 0.300652  | 0.514417  |
| H | 1.285783  | 4.055673  | -1.702480 |
| H | 2.026478  | 2.352432  | -1.683316 |
| H | -0.889958 | -0.436077 | -3.009079 |
| H | 4.085840  | -1.877825 | 0.816316  |
| H | 4.948013  | -0.695069 | -0.173705 |
| H | 4.883657  | 0.171451  | 2.003731  |
| H | 4.383786  | 1.844829  | 0.202579  |
| H | 2.650328  | 1.639627  | 0.513052  |
| H | 3.691174  | 2.321039  | 1.762037  |
| H | 2.926294  | 0.512805  | 3.422458  |
| H | 3.050358  | -1.200912 | 2.993030  |
| H | 1.849950  | -0.175582 | 2.195426  |

ωB97XD energy = -1304.08011691 a.u.

#### Lobatolide A (11), Conf. J

|   |           |           |           |
|---|-----------|-----------|-----------|
| C | -1.553473 | -2.059219 | 0.700989  |
| C | -2.576332 | -1.568999 | 1.670260  |
| C | -2.532193 | -0.017521 | 1.681402  |
| C | -2.403913 | 0.620079  | 0.289491  |
| C | -0.981013 | 1.122716  | -0.105720 |
| C | -0.305884 | 0.441839  | -1.329745 |
| C | 0.837729  | -0.541791 | -0.984405 |
| C | 0.487033  | -1.841049 | -0.254840 |
| O | -0.327195 | -1.529302 | 0.888981  |
| C | -0.421685 | -2.731853 | -1.124704 |
| C | -1.668591 | -2.829422 | -0.407184 |
| O | -3.265671 | 1.790875  | 0.268023  |
| C | -2.620951 | 2.917036  | -0.061188 |
| C | -1.194402 | 2.600451  | -0.322612 |
| C | 1.715175  | -2.618179 | 0.191634  |
| C | -3.970578 | -2.106559 | 1.351607  |
| O | -0.075457 | -3.214989 | -2.193645 |
| O | -3.182392 | 3.988844  | -0.117232 |
| C | -0.314008 | 3.534696  | -0.673857 |
| O | -1.287313 | -0.154403 | -2.147781 |
| O | 1.763283  | 0.196074  | -0.174509 |
| C | 2.802783  | 0.805860  | -0.781082 |

|   |           |           |           |
|---|-----------|-----------|-----------|
| O | 3.029973  | 0.692635  | -1.967330 |
| C | 3.605076  | 1.652692  | 0.173497  |
| C | 4.264225  | 0.902451  | 1.353113  |
| C | 3.281299  | 0.544742  | 2.470274  |
| C | 5.046876  | -0.320210 | 0.869412  |
| H | -2.280719 | -1.912499 | 2.669141  |
| H | -3.468385 | 0.332017  | 2.125189  |
| H | -1.720812 | 0.332785  | 2.325588  |
| H | -2.804323 | -0.041680 | -0.480907 |
| H | -0.309448 | 0.995406  | 0.746275  |
| H | 0.198412  | 1.239687  | -1.888994 |
| H | 1.329590  | -0.829467 | -1.919086 |
| H | -2.559380 | -3.330399 | -0.755009 |
| H | 2.330014  | -2.859770 | -0.679587 |
| H | 2.306316  | -2.033324 | 0.897725  |
| H | 1.409269  | -3.551462 | 0.672111  |
| H | -4.330872 | -1.735910 | 0.385749  |
| H | -4.676343 | -1.781716 | 2.120508  |
| H | -3.981173 | -3.200261 | 1.324863  |
| H | -0.626694 | 4.569039  | -0.784413 |
| H | 0.730471  | 3.299942  | -0.862260 |
| H | -0.911107 | -0.335115 | -3.017468 |
| H | 4.374643  | 2.138117  | -0.430565 |
| H | 2.938670  | 2.431739  | 0.562508  |
| H | 4.984693  | 1.617183  | 1.770065  |
| H | 2.532793  | -0.178731 | 2.136214  |
| H | 3.816469  | 0.109485  | 3.320879  |
| H | 2.750000  | 1.433615  | 2.828211  |
| H | 5.589233  | -0.785166 | 1.699102  |
| H | 5.775248  | -0.048122 | 0.098157  |
| H | 4.378585  | -1.079853 | 0.445901  |

ωB97XD energy = -1304.07966183 a.u.

#### Lobatolide A (11), Conf. K

|   |           |           |           |
|---|-----------|-----------|-----------|
| C | -1.502087 | -1.959575 | 0.894880  |
| C | -2.401880 | -1.393926 | 1.941587  |
| C | -2.362900 | 0.153791  | 1.822840  |
| C | -2.391250 | 0.670363  | 0.375711  |
| C | -1.028236 | 1.165544  | -0.199787 |
| C | -0.469080 | 0.402901  | -1.434302 |
| C | 0.693122  | -0.576242 | -1.145714 |
| C | 0.409530  | -1.830748 | -0.310411 |
| O | -0.260112 | -1.434156 | 0.899772  |
| C | -0.605296 | -2.755294 | -1.010478 |
| C | -1.755396 | -2.794174 | -0.141393 |
| O | -3.287584 | 1.813999  | 0.334590  |
| C | -2.712993 | 2.919225  | -0.156358 |
| C | -1.303371 | 2.616754  | -0.509525 |
| C | 1.669820  | -2.606816 | 0.041522  |
| C | -3.822416 | -1.944306 | 1.832356  |
| O | -0.397436 | -3.303426 | -2.083930 |
| O | -3.313676 | 3.965755  | -0.262010 |
| C | -0.480235 | 3.541642  | -0.998035 |
| O | -1.530066 | -0.224466 | -2.120018 |
| O | 1.683340  | 0.220593  | -0.485622 |
| C | 2.931805  | 0.284403  | -0.994204 |

|   |           |           |           |
|---|-----------|-----------|-----------|
| O | 3.274053  | -0.320660 | -1.987412 |
| C | 3.824090  | 1.171383  | -0.170028 |
| C | 4.330561  | 0.497891  | 1.128818  |
| C | 5.562802  | 1.250884  | 1.635523  |
| C | 3.254097  | 0.435561  | 2.214391  |
| H | -1.986544 | -1.660911 | 2.920537  |
| H | -3.246040 | 0.543084  | 2.336552  |
| H | -1.485974 | 0.551668  | 2.340695  |
| H | -2.842402 | -0.066027 | -0.291611 |
| H | -0.268598 | 1.115560  | 0.583274  |
| H | -0.009091 | 1.160712  | -2.081322 |
| H | 1.091498  | -0.924738 | -2.104114 |
| H | -2.684783 | -3.304967 | -0.343652 |
| H | 2.175843  | -2.920041 | -0.874781 |
| H | 2.350208  | -1.995839 | 0.638624  |
| H | 1.405624  | -3.497694 | 0.618079  |
| H | -4.296009 | -1.640377 | 0.892801  |
| H | -4.430678 | -1.560102 | 2.655543  |
| H | -3.834574 | -3.037003 | 1.885279  |
| H | -0.831582 | 4.556381  | -1.161633 |
| H | 0.554694  | 3.316782  | -1.241575 |
| H | -1.234711 | -0.483581 | -3.000940 |
| H | 4.675120  | 1.428462  | -0.804854 |
| H | 3.286986  | 2.092130  | 0.083983  |
| H | 4.639125  | -0.526074 | 0.878764  |
| H | 5.946073  | 0.794911  | 2.554346  |
| H | 6.367745  | 1.243370  | 0.893435  |
| H | 5.317149  | 2.296795  | 1.857596  |
| H | 2.355257  | -0.088948 | 1.880636  |
| H | 2.955913  | 1.447806  | 2.514732  |
| H | 3.637464  | -0.078054 | 3.102277  |

ωB97XD energy = -1304.07947075 a.u.

#### Lobatulide A (**11**), Conf. L

|   |           |           |           |
|---|-----------|-----------|-----------|
| C | 2.604834  | -1.421432 | -0.653972 |
| C | 3.480521  | -0.481960 | -1.413313 |
| C | 2.774883  | 0.898710  | -1.459786 |
| C | 2.158154  | 1.328036  | -0.119588 |
| C | 0.609001  | 1.188491  | 0.002482  |
| C | 0.074783  | 0.195632  | 1.072299  |
| C | -0.462298 | -1.149858 | 0.527575  |
| C | 0.526283  | -2.132464 | -0.107164 |
| O | 1.323575  | -1.427587 | -1.074521 |
| C | 1.554999  | -2.635512 | 0.924488  |
| C | 2.834076  | -2.157877 | 0.459460  |
| O | 2.452881  | 2.739153  | 0.064959  |
| C | 1.362505  | 3.482335  | 0.291555  |
| C | 0.165127  | 2.605091  | 0.274907  |
| C | -0.167332 | -3.304147 | -0.784550 |
| C | 4.883375  | -0.393713 | -0.814694 |
| O | 1.260351  | -3.298025 | 1.909501  |
| O | 1.424217  | 4.678573  | 0.471739  |
| C | -1.064000 | 3.079795  | 0.464049  |
| O | 1.051062  | 0.003230  | 2.072950  |
| O | -1.457684 | -0.838934 | -0.455748 |
| C | -2.735734 | -0.682122 | -0.043394 |

|   |           |           |           |
|---|-----------|-----------|-----------|
| O | -3.060280 | -0.766348 | 1.120894  |
| C | -3.635215 | -0.425869 | -1.225888 |
| C | -4.996763 | 0.218612  | -0.925659 |
| C | -5.932382 | -0.695182 | -0.129563 |
| C | -4.844005 | 1.590209  | -0.262098 |
| H | 3.553573  | -0.850803 | -2.443573 |
| H | 3.527198  | 1.641665  | -1.737686 |
| H | 2.009260  | 0.905799  | -2.240177 |
| H | 2.650597  | 0.823339  | 0.713848  |
| H | 0.200748  | 0.878999  | -0.962581 |
| H | -0.811024 | 0.665858  | 1.515854  |
| H | -0.937307 | -1.677812 | 1.361519  |
| H | 3.777497  | -2.276913 | 0.970540  |
| H | -0.771070 | -3.845255 | -0.050938 |
| H | -0.813772 | -2.953312 | -1.591229 |
| H | 0.578335  | -3.990363 | -1.195225 |
| H | 4.860933  | 0.039644  | 0.190878  |
| H | 5.512721  | 0.243381  | -1.441943 |
| H | 5.356456  | -1.378072 | -0.752451 |
| H | -1.222378 | 4.138980  | 0.644798  |
| H | -1.937941 | 2.433456  | 0.445741  |
| H | 0.634471  | -0.377408 | 2.855306  |
| H | -3.072110 | 0.187992  | -1.936472 |
| H | -3.776297 | -1.400140 | -1.713143 |
| H | -5.454919 | 0.378079  | -1.910154 |
| H | -6.053632 | -1.665656 | -0.624079 |
| H | -5.549752 | -0.872699 | 0.879088  |
| H | -6.924251 | -0.238885 | -0.041996 |
| H | -5.818525 | 2.079346  | -0.161187 |
| H | -4.201886 | 2.249588  | -0.857388 |
| H | -4.414761 | 1.500043  | 0.741584  |

ωB97XD energy = -1304.07915646 a.u.

#### 3-methylenecyclopent-1-ene (**12**), Conf A

|   |           |           |           |
|---|-----------|-----------|-----------|
| C | -1.531570 | -0.607359 | -0.000018 |
| C | -0.097887 | -1.194205 | 0.000018  |
| C | 0.834517  | 0.010371  | 0.000005  |
| C | -0.013028 | 1.209391  | 0.000009  |
| C | -1.312528 | 0.883354  | 0.000002  |
| C | 2.173458  | -0.015971 | -0.000012 |
| H | -2.108363 | -0.919971 | 0.878340  |
| H | -2.108308 | -0.919951 | -0.878421 |
| H | 0.083029  | -1.818443 | 0.879986  |
| H | 0.083061  | -1.818498 | -0.879903 |
| H | 0.387811  | 2.218235  | 0.000014  |
| H | -2.131565 | 1.596152  | 0.000001  |
| H | 2.722473  | -0.954106 | -0.000020 |
| H | 2.754095  | 0.903097  | -0.000021 |

ωB97XD energy = -233.364666717 a.u.

#### (S)-4-isopropyl-1-methyl-3-methylenecyclohex-1-ene (**13**), Conf. A

|   |           |          |          |
|---|-----------|----------|----------|
| C | 0.782550  | 0.112096 | 0.719612 |
| C | -0.043925 | 1.331173 | 0.352394 |

|   |           |           |           |
|---|-----------|-----------|-----------|
| C | -1.361893 | 1.061320  | -0.243369 |
| C | -1.945823 | -0.149970 | -0.238612 |
| C | -1.285855 | -1.329599 | 0.432077  |
| C | -0.161151 | -0.908352 | 1.378334  |
| C | 1.540619  | -0.454513 | -0.514415 |
| C | 2.566238  | 0.548630  | -1.050049 |
| C | 2.235674  | -1.782618 | -0.197444 |
| C | 0.390134  | 2.586446  | 0.540804  |
| C | -3.276229 | -0.405444 | -0.884932 |
| H | 1.541458  | 0.411812  | 1.454768  |
| H | -1.877881 | 1.904002  | -0.702435 |
| H | -2.045101 | -1.900205 | 0.981570  |
| H | -0.907061 | -2.012580 | -0.342924 |
| H | -0.602664 | -0.441376 | 2.267411  |
| H | 0.391076  | -1.784765 | 1.729059  |
| H | 0.805736  | -0.637436 | -1.310182 |
| H | 2.100184  | 1.492033  | -1.346694 |
| H | 3.325366  | 0.772950  | -0.289446 |
| H | 3.082688  | 0.140093  | -1.925359 |
| H | 2.835823  | -2.111707 | -1.052704 |
| H | 1.525172  | -2.583303 | 0.028224  |
| H | 2.911371  | -1.677410 | 0.661061  |
| H | -0.214201 | 3.444380  | 0.253447  |
| H | 1.361847  | 2.789128  | 0.983637  |
| H | -3.674117 | 0.489508  | -1.371608 |
| H | -3.193517 | -1.198397 | -1.639368 |
| H | -4.008218 | -0.751737 | -0.144868 |

ωB97XD energy = -429.913680817 a.u.

(*S*)-4-isopropyl-1-methyl-3-methylenecyclohex-1-ene (**13**), Conf. B

|   |           |           |           |
|---|-----------|-----------|-----------|
| C | -0.625600 | -0.098912 | -0.408684 |
| C | 0.174703  | 1.185208  | -0.223027 |
| C | 1.633511  | 1.015752  | -0.112861 |
| C | 2.250574  | -0.172620 | -0.003220 |
| C | 1.456512  | -1.451835 | 0.071339  |
| C | -0.000648 | -1.205965 | 0.455775  |
| C | -2.152026 | 0.042145  | -0.225065 |
| C | -2.903123 | -1.157234 | -0.812284 |
| C | -2.569081 | 0.271201  | 1.231544  |
| C | -0.350706 | 2.420732  | -0.206574 |
| C | 3.744778  | -0.303920 | 0.052200  |
| H | -0.462772 | -0.393554 | -1.458433 |
| H | 2.230904  | 1.926738  | -0.138291 |
| H | 1.510857  | -1.960594 | -0.902865 |
| H | 1.929876  | -2.131123 | 0.791349  |
| H | -0.567748 | -2.136304 | 0.352445  |
| H | -0.047461 | -0.915120 | 1.512489  |
| H | -2.464474 | 0.916749  | -0.808758 |
| H | -3.984916 | -0.991583 | -0.761870 |
| H | -2.639432 | -1.320774 | -1.863280 |
| H | -2.690794 | -2.082014 | -0.263767 |
| H | -2.410014 | -0.630228 | 1.834270  |
| H | -3.634718 | 0.518593  | 1.290809  |
| H | -2.008242 | 1.088976  | 1.694570  |
| H | 0.292778  | 3.292365  | -0.111223 |

|   |           |           |           |
|---|-----------|-----------|-----------|
| H | -1.415987 | 2.610444  | -0.284645 |
| H | 4.245613  | 0.660939  | -0.068668 |
| H | 4.061253  | -0.741955 | 1.007014  |
| H | 4.101908  | -0.978878 | -0.736003 |

ωB97XD energy = -429.911869437 a.u.

(*S*)-4-isopropyl-1-methyl-3-methylenecyclohex-1-ene (**13**), Conf. C

|   |           |           |           |
|---|-----------|-----------|-----------|
| C | 0.823437  | -0.035047 | 0.861008  |
| C | 0.229868  | 1.219812  | 0.247128  |
| C | -1.127503 | 1.115084  | -0.306315 |
| C | -1.932287 | 0.052370  | -0.134882 |
| C | -1.500065 | -1.135776 | 0.685675  |
| C | -0.284184 | -0.837969 | 1.565229  |
| C | 1.676448  | -0.868889 | -0.144921 |
| C | 1.064079  | -1.054310 | -1.537935 |
| C | 3.080700  | -0.273404 | -0.291646 |
| C | 0.906424  | 2.378296  | 0.192310  |
| C | -3.299155 | -0.027524 | -0.750665 |
| H | 1.522743  | 0.281736  | 1.644078  |
| H | -1.484915 | 1.965771  | -0.886254 |
| H | -2.339258 | -1.458283 | 1.315482  |
| H | -1.302738 | -1.981123 | 0.011994  |
| H | -0.622448 | -0.252615 | 2.429191  |
| H | 0.132346  | -1.771047 | 1.961543  |
| H | 1.786376  | -1.863308 | 0.310154  |
| H | 1.725475  | -1.672482 | -2.155447 |
| H | 0.088129  | -1.543952 | -1.512928 |
| H | 0.944228  | -0.090705 | -2.045658 |
| H | 3.576218  | -0.163399 | 0.679456  |
| H | 3.039905  | 0.714576  | -0.764885 |
| H | 3.709659  | -0.914524 | -0.919457 |
| H | 0.476178  | 3.262984  | -0.272244 |
| H | 1.901615  | 2.476378  | 0.617697  |
| H | -3.519339 | 0.843398  | -1.374625 |
| H | -3.388177 | -0.927798 | -1.372071 |
| H | -4.072566 | -0.101467 | 0.024048  |

ωB97XD energy = -429.910925178 a.u.

(*S*)-4-isopropyl-1-methyl-3-methylenecyclohex-1-ene (**13**), Conf. D

|   |           |           |           |
|---|-----------|-----------|-----------|
| C | -0.878436 | 0.379228  | -0.719575 |
| C | 0.114567  | 1.424724  | -0.241687 |
| C | 1.440496  | 0.956735  | 0.180991  |
| C | 1.874218  | -0.308096 | 0.043339  |
| C | 1.022538  | -1.361481 | -0.616257 |
| C | -0.133649 | -0.767854 | -1.424028 |
| C | -1.868654 | -0.026700 | 0.413230  |
| C | -2.883291 | -1.064386 | -0.074037 |
| C | -1.232596 | -0.476665 | 1.732165  |
| C | -0.213351 | 2.724533  | -0.168209 |
| C | 3.219348  | -0.750971 | 0.541606  |
| H | -1.509844 | 0.853144  | -1.481795 |
| H | 2.094865  | 1.696651  | 0.641400  |
| H | 1.656782  | -1.968218 | -1.275529 |
| H | 0.656435  | -2.055337 | 0.152096  |

|   |           |           |           |
|---|-----------|-----------|-----------|
| H | 0.279093  | -0.363476 | -2.356745 |
| H | -0.835052 | -1.555892 | -1.714052 |
| H | -2.425163 | 0.894213  | 0.635107  |
| H | -3.688296 | -1.185398 | 0.659087  |
| H | -3.338710 | -0.767223 | -1.025753 |
| H | -2.420369 | -2.047934 | -0.215031 |
| H | -0.517156 | 0.258399  | 2.112370  |
| H | -0.715107 | -1.435842 | 1.632393  |
| H | -2.010730 | -0.604936 | 2.493253  |
| H | 0.487793  | 3.466143  | 0.208116  |
| H | -1.191271 | 3.081900  | -0.482514 |
| H | 3.763322  | 0.065203  | 1.025851  |
| H | 3.111904  | -1.567862 | 1.266791  |
| H | 3.834368  | -1.137934 | -0.280274 |

ωB97XD energy = -429.910719744 a.u.

**Table S40.** Cartesian coordinates and energies of the low-energy conformers calculated at the CAM-B3LYP/TZVP PCM (solvent: MeCN) level.

|                                                              |           |           |           |                                                              |           |           |           |
|--------------------------------------------------------------|-----------|-----------|-----------|--------------------------------------------------------------|-----------|-----------|-----------|
| (2 <i>S</i> ,6 <i>R</i> ,7 <i>S</i> ,8 <i>R</i> )-1, Conf. A |           |           |           | H                                                            | 4.684668  | -0.398628 | 1.572176  |
| C                                                            | -3.956291 | -1.594450 | -0.433462 | H                                                            | 5.526064  | 0.527038  | 0.323380  |
| C                                                            | -3.376646 | -0.330803 | -0.989098 | CAM-B3LYP energy = -1154.93136299 a.u.                       |           |           |           |
| C                                                            | -3.339301 | 0.867882  | -0.413733 | (2 <i>S</i> ,6 <i>R</i> ,7 <i>S</i> ,8 <i>R</i> )-1, Conf. B |           |           |           |
| C                                                            | -4.118690 | 1.268152  | 0.805595  | C                                                            | -3.643379 | -1.943626 | -0.454573 |
| C                                                            | -1.751744 | -1.901034 | 0.737765  | C                                                            | -3.179001 | -0.660705 | -1.071020 |
| C                                                            | -2.818066 | -2.579369 | -0.082838 | C                                                            | -3.327061 | 0.571625  | -0.592935 |
| C                                                            | -0.927793 | 1.472918  | -0.853957 | C                                                            | -4.236237 | 0.957855  | 0.537814  |
| C                                                            | -0.428563 | 1.086607  | 0.560109  | C                                                            | -1.515746 | -1.883842 | 0.884910  |
| C                                                            | 0.214800  | -0.311937 | 0.640464  | C                                                            | -2.425207 | -2.748931 | 0.050915  |
| C                                                            | -0.713136 | -1.360570 | 0.109961  | C                                                            | -0.980249 | 1.445085  | -0.917536 |
| O                                                            | -0.081848 | 2.570399  | -1.292568 | C                                                            | -0.548836 | 1.227637  | 0.553744  |
| C                                                            | 0.725567  | 3.018220  | -0.319691 | C                                                            | 0.247304  | -0.070917 | 0.791956  |
| C                                                            | 0.520910  | 2.199032  | 0.900474  | C                                                            | -0.504578 | -1.263356 | 0.287058  |
| O                                                            | 1.470955  | 3.947773  | -0.486587 | O                                                            | -0.244093 | 2.608401  | -1.384591 |
| C                                                            | 1.106467  | 2.485231  | 2.049871  | C                                                            | 0.430723  | 3.220042  | -0.400125 |
| C                                                            | -2.386530 | 1.925589  | -0.940887 | C                                                            | 0.236564  | 2.469317  | 0.864753  |
| C                                                            | -2.041937 | -1.733725 | 2.198799  | O                                                            | 1.070336  | 4.221044  | -0.591100 |
| O                                                            | -4.782788 | -2.278040 | -1.380259 | C                                                            | 0.700837  | 2.904214  | 2.022871  |
| O                                                            | 1.405758  | -0.261160 | -0.174639 | C                                                            | -2.471997 | 1.698958  | -1.142377 |
| C                                                            | 2.401864  | -1.113537 | 0.113511  | C                                                            | -1.936919 | -1.649918 | 2.304246  |
| O                                                            | 2.360359  | -1.879756 | 1.043348  | O                                                            | -4.306491 | -2.792594 | -1.395976 |
| C                                                            | 3.526286  | -1.003974 | -0.878669 | O                                                            | 1.482289  | 0.067313  | 0.056324  |
| C                                                            | 4.885505  | -1.436473 | -0.333569 | C                                                            | 2.565476  | -0.582818 | 0.510101  |
| C                                                            | 5.892093  | -1.553983 | -1.473175 | O                                                            | 2.547608  | -1.281307 | 1.492473  |
| C                                                            | 5.385149  | -0.473822 | 0.739520  | C                                                            | 3.775295  | -0.283975 | -0.331601 |
| H                                                            | -4.538356 | -1.390823 | 0.466874  | C                                                            | 4.882983  | -1.329988 | -0.236450 |
| H                                                            | -2.794464 | -0.485319 | -1.894709 | C                                                            | 4.455466  | -2.652699 | -0.865388 |
| H                                                            | -3.457940 | 1.519105  | 1.639315  | C                                                            | 6.156335  | -0.802475 | -0.889546 |
| H                                                            | -4.815821 | 0.505077  | 1.142169  | H                                                            | -4.313303 | -1.750823 | 0.385008  |
| H                                                            | -2.398960 | -2.934780 | -1.025677 | H                                                            | -2.518411 | -0.806159 | -1.922792 |
| H                                                            | -3.251749 | -3.435294 | 0.437575  | H                                                            | -4.860843 | 0.140095  | 0.888127  |
| H                                                            | -4.691048 | 2.173133  | 0.587206  | H                                                            | -4.894304 | 1.767143  | 0.211775  |
| H                                                            | -1.262609 | 1.071692  | 1.258750  | H                                                            | -1.894353 | -3.114869 | -0.829502 |
| H                                                            | 0.512420  | -0.500563 | 1.670004  | H                                                            | -2.791372 | -3.613303 | 0.607876  |
| H                                                            | -0.602186 | -1.544571 | -0.953434 | H                                                            | -3.673556 | 1.347097  | 1.390138  |
| H                                                            | 0.941222  | 1.895134  | 2.942008  | H                                                            | -1.425950 | 1.163784  | 1.194572  |
| H                                                            | 1.776121  | 3.332564  | 2.122828  | H                                                            | 0.485027  | -0.145003 | 1.851349  |
| H                                                            | -2.498574 | 2.847493  | -0.367028 | H                                                            | -0.289983 | -1.509029 | -0.747582 |
| H                                                            | -0.748920 | 0.670872  | -1.563891 | H                                                            | 0.542470  | 2.361660  | 2.945890  |
| H                                                            | -2.603292 | 2.170357  | -1.982240 | H                                                            | 1.259459  | 3.830126  | 2.071838  |
| H                                                            | -2.247981 | -2.706328 | 2.650781  | H                                                            | -2.740390 | 2.640705  | -0.659921 |
| H                                                            | -2.934023 | -1.122057 | 2.355632  | H                                                            | -0.647796 | 0.624835  | -1.546890 |
| H                                                            | -1.220949 | -1.274383 | 2.745809  | H                                                            | -2.634284 | 1.832680  | -2.213364 |
| H                                                            | -5.519326 | -1.700604 | -1.607916 | H                                                            | -2.051669 | -2.605610 | 2.820255  |
| H                                                            | 3.240794  | -1.637931 | -1.724130 | H                                                            | -2.909233 | -1.152897 | 2.349714  |
| H                                                            | 3.562834  | 0.017916  | -1.259781 | H                                                            | -1.226197 | -1.046525 | 2.865531  |
| H                                                            | 4.761193  | -2.422474 | 0.120249  | H                                                            | -5.090266 | -2.332489 | -1.715093 |
| H                                                            | 6.864226  | -1.878189 | -1.099003 | H                                                            | 3.456585  | -0.143255 | -1.366015 |
| H                                                            | 5.562410  | -2.275003 | -2.223270 | H                                                            | 4.144076  | 0.688397  | 0.009363  |
| H                                                            | 6.031341  | -0.591067 | -1.971060 | H                                                            | 5.085270  | -1.502868 | 0.823168  |
| H                                                            | 6.343754  | -0.805823 | 1.141090  |                                                              |           |           |           |



|   |          |           |           |
|---|----------|-----------|-----------|
| H | 5.244489 | -3.400021 | -0.768172 |
| H | 3.558249 | -3.053478 | -0.392518 |
| H | 4.248820 | -2.522846 | -1.930882 |
| H | 6.961198 | -1.535188 | -0.815411 |
| H | 6.495474 | 0.119755  | -0.414543 |
| H | 5.992978 | -0.593669 | -1.949846 |

CAM-B3LYP energy = -1154.93129627 a.u.

(2S,6R,7S,8R)-1, Conf. C

|   |           |           |           |
|---|-----------|-----------|-----------|
| C | -4.161768 | -0.914152 | -0.557048 |
| C | -3.299268 | 0.211801  | -1.036316 |
| C | -3.021755 | 1.348711  | -0.403964 |
| C | -3.738477 | 1.861315  | 0.811548  |
| C | -2.115976 | -1.751363 | 0.645143  |
| C | -3.281246 | -2.141015 | -0.227332 |
| C | -0.523170 | 1.422872  | -0.751051 |
| C | -0.173756 | 0.868805  | 0.651758  |
| C | 0.155147  | -0.637037 | 0.663757  |
| C | -0.964023 | -1.432612 | 0.065188  |
| O | 0.560540  | 2.323892  | -1.107353 |
| C | 1.407423  | 2.537353  | -0.089461 |
| C | 0.978170  | 1.731362  | 1.079738  |
| O | 2.346407  | 3.283474  | -0.186257 |
| C | 1.559277  | 1.835060  | 2.261843  |
| C | -1.841604 | 2.191335  | -0.852550 |
| C | -2.406076 | -1.583076 | 2.106194  |
| O | -5.085193 | -1.357544 | -1.555977 |
| O | 1.346560  | -0.795742 | -0.136016 |
| C | 2.131628  | -1.858064 | 0.098868  |
| O | 1.891799  | -2.673013 | 0.955624  |
| C | 3.317257  | -1.887916 | -0.823120 |
| C | 4.241170  | -0.669346 | -0.686947 |
| C | 4.801419  | -0.547905 | 0.726271  |
| C | 5.362927  | -0.756464 | -1.715896 |
| H | -4.716016 | -0.624686 | 0.337275  |
| H | -2.734242 | -0.030737 | -1.933528 |
| H | -4.596346 | 1.256920  | 1.095069  |
| H | -4.092278 | 2.877456  | 0.620137  |
| H | -2.923800 | -2.543299 | -1.176626 |
| H | -3.909573 | -2.898587 | 0.244594  |
| H | -3.068486 | 1.929006  | 1.672444  |
| H | -1.017275 | 0.997104  | 1.326657  |
| H | 0.384035  | -0.938790 | 1.684225  |
| H | -0.862154 | -1.595598 | -1.002538 |
| H | 1.229561  | 1.259066  | 3.116807  |
| H | 2.392539  | 2.511859  | 2.401001  |
| H | -1.768871 | 3.088944  | -0.235568 |
| H | -0.498383 | 0.635290  | -1.498160 |
| H | -1.961275 | 2.523652  | -1.885277 |
| H | -1.520465 | -1.344762 | 2.692149  |
| H | -2.839557 | -2.501913 | 2.506929  |
| H | -3.142228 | -0.792841 | 2.273898  |
| H | -5.669139 | -0.622842 | -1.773033 |
| H | 3.868311  | -2.804679 | -0.613557 |
| H | 2.941097  | -1.945488 | -1.846939 |
| H | 3.648563  | 0.222940  | -0.901287 |

|   |          |           |           |
|---|----------|-----------|-----------|
| H | 5.446090 | 0.328034  | 0.810209  |
| H | 4.010474 | -0.447170 | 1.471751  |
| H | 5.395523 | -1.428199 | 0.983977  |
| H | 6.014300 | 0.116375  | -1.652354 |
| H | 4.968148 | -0.809100 | -2.731897 |
| H | 5.976753 | -1.644467 | -1.546271 |

CAM-B3LYP energy = -1154.93088597 a.u.

(2S,6R,7S,8R)-1, Conf. D

|   |           |           |           |
|---|-----------|-----------|-----------|
| C | -3.581360 | -1.709232 | -0.482294 |
| C | -2.933037 | -0.550226 | -1.173154 |
| C | -3.022789 | 0.738939  | -0.857974 |
| C | -4.017585 | 1.329531  | 0.099198  |
| C | -1.627273 | -1.651669 | 1.102298  |
| C | -2.510389 | -2.538240 | 0.262765  |
| C | -0.583990 | 1.380533  | -0.977818 |
| C | -0.352037 | 1.308296  | 0.551348  |
| C | 0.294029  | -0.006911 | 1.028787  |
| C | -0.500177 | -1.190726 | 0.570837  |
| O | 0.306965  | 2.417928  | -1.470470 |
| C | 0.906582  | 3.094354  | -0.479493 |
| C | 0.493292  | 2.518893  | 0.824160  |
| O | 1.650141  | 4.015458  | -0.694374 |
| C | 0.846514  | 3.057252  | 1.978019  |
| C | -2.009461 | 1.721704  | -1.416215 |
| C | -2.185904 | -1.212544 | 2.422088  |
| O | -4.199983 | -2.614428 | -1.401469 |
| O | 1.611211  | -0.052986 | 0.439408  |
| C | 2.571261  | -0.733911 | 1.083987  |
| O | 2.389465  | -1.277789 | 2.145502  |
| C | 3.862652  | -0.728211 | 0.317542  |
| C | 3.783084  | -1.490377 | -1.014085 |
| C | 5.106536  | -1.362695 | -1.760077 |
| C | 3.413097  | -2.954626 | -0.801629 |
| H | -4.327436 | -1.366074 | 0.236437  |
| H | -2.194945 | -0.849091 | -1.914065 |
| H | -3.523960 | 1.778950  | 0.964723  |
| H | -4.559007 | 2.138879  | -0.396942 |
| H | -1.916936 | -3.051092 | -0.495921 |
| H | -3.017920 | -3.295680 | 0.862860  |
| H | -4.748509 | 0.610633  | 0.460370  |
| H | -1.302154 | 1.381495  | 1.076051  |
| H | 0.403216  | 0.029488  | 2.110877  |
| H | -0.192028 | -1.576332 | -0.395248 |
| H | 0.528956  | 2.643682  | 2.926471  |
| H | 1.472973  | 3.939826  | 1.997326  |
| H | -2.244057 | 2.732399  | -1.077020 |
| H | -0.258087 | 0.466993  | -1.466127 |
| H | -2.033248 | 1.738273  | -2.507244 |
| H | -1.489680 | -0.606679 | 2.998705  |
| H | -2.452772 | -2.085333 | 3.021880  |
| H | -3.103514 | -0.634096 | 2.288366  |
| H | -4.893011 | -2.138657 | -1.871706 |
| H | 4.137266  | 0.310459  | 0.123950  |
| H | 4.625398  | -1.170076 | 0.958621  |
| H | 3.002824  | -1.020237 | -1.617609 |

|   |          |           |           |
|---|----------|-----------|-----------|
| H | 5.057336 | -1.872439 | -2.723408 |
| H | 5.361117 | -0.317645 | -1.944016 |
| H | 5.920521 | -1.812145 | -1.185958 |
| H | 3.356133 | -3.478270 | -1.756833 |
| H | 2.447143 | -3.065541 | -0.305824 |
| H | 4.163712 | -3.457956 | -0.187249 |

CAM-B3LYP energy = -1154.93086664 a.u.

(2S,6R,7S,8R)-1, Conf. E

|   |           |           |           |
|---|-----------|-----------|-----------|
| C | -3.962652 | -1.596505 | -0.431949 |
| C | -3.381429 | -0.332388 | -0.987631 |
| C | -3.341733 | 0.866770  | -0.414942 |
| C | -4.119213 | 1.267493  | 0.805212  |
| C | -1.750258 | -1.897011 | 0.742355  |
| C | -2.815778 | -2.579939 | -0.075372 |
| C | -0.930531 | 1.471977  | -0.856864 |
| C | -0.430963 | 1.090714  | 0.558314  |
| C | 0.214913  | -0.306455 | 0.642749  |
| C | -0.710311 | -1.358762 | 0.114654  |
| O | -0.084935 | 2.568175  | -1.299378 |
| C | 0.721596  | 3.020298  | -0.327694 |
| C | 0.516601  | 2.205714  | 0.895510  |
| O | 1.466524  | 3.949635  | -0.497718 |
| C | 1.100208  | 2.497327  | 2.044536  |
| C | -2.389476 | 1.923631  | -0.944990 |
| C | -2.045872 | -1.721003 | 2.201335  |
| O | -4.885926 | -2.223982 | -1.322848 |
| O | 1.406449  | -0.255854 | -0.171449 |
| C | 2.402388  | -1.108045 | 0.118200  |
| O | 2.359855  | -1.873726 | 1.048397  |
| C | 3.527571  | -0.998899 | -0.873157 |
| C | 4.884561  | -1.440903 | -0.330296 |
| C | 5.890094  | -1.559908 | -1.470702 |
| C | 5.390001  | -0.485039 | 0.746141  |
| H | -4.545931 | -1.392940 | 0.462742  |
| H | -2.795485 | -0.483650 | -1.892690 |
| H | -3.457589 | 1.528427  | 1.635133  |
| H | -4.810031 | 0.501302  | 1.147775  |
| H | -2.387245 | -2.942615 | -1.012945 |
| H | -3.248844 | -3.434545 | 0.447492  |
| H | -4.699884 | 2.166451  | 0.583860  |
| H | -1.265051 | 1.076293  | 1.256887  |
| H | 0.512066  | -0.491722 | 1.673066  |
| H | -0.595430 | -1.548567 | -0.947380 |
| H | 0.934490  | 1.910619  | 2.938818  |
| H | 1.768644  | 3.345833  | 2.114987  |
| H | -2.501950 | 2.846873  | -0.373400 |
| H | -0.751306 | 0.667508  | -1.564023 |
| H | -2.606469 | 2.165943  | -1.986857 |
| H | -2.251456 | -2.691031 | 2.658974  |
| H | -2.939498 | -1.109972 | 2.351677  |
| H | -1.227682 | -1.256427 | 2.748054  |
| H | -4.432999 | -2.416720 | -2.152087 |
| H | 3.238993  | -1.626757 | -1.722115 |
| H | 3.568984  | 0.024823  | -1.248927 |
| H | 4.754941  | -2.427860 | 0.119948  |

|   |          |           |           |
|---|----------|-----------|-----------|
| H | 6.860502 | -1.890943 | -1.098036 |
| H | 5.556113 | -2.276356 | -2.223282 |
| H | 6.034624 | -0.596007 | -1.965153 |
| H | 6.346687 | -0.824083 | 1.146407  |
| H | 4.690028 | -0.408685 | 1.579105  |
| H | 5.536756 | 0.516416  | 0.333482  |

CAM-B3LYP energy = -1154.93052753 a.u.

(2S,6R,7S,8R)-1, Conf. F

|   |           |           |           |
|---|-----------|-----------|-----------|
| C | -3.970609 | -1.577642 | -0.438833 |
| C | -3.389744 | -0.318400 | -0.994539 |
| C | -3.337552 | 0.875572  | -0.412386 |
| C | -4.106052 | 1.276069  | 0.813709  |
| C | -1.756395 | -1.893118 | 0.732632  |
| C | -2.823000 | -2.565248 | -0.091963 |
| C | -0.924415 | 1.475653  | -0.855106 |
| C | -0.424946 | 1.090087  | 0.558990  |
| C | 0.215011  | -0.309837 | 0.639549  |
| C | -0.715140 | -1.355202 | 0.106791  |
| O | -0.077024 | 2.571622  | -1.295137 |
| C | 0.731902  | 3.018814  | -0.323300 |
| C | 0.526958  | 2.200885  | 0.897683  |
| O | 1.478724  | 3.947024  | -0.491412 |
| C | 1.114069  | 2.486694  | 2.046380  |
| C | -2.382427 | 1.929962  | -0.942265 |
| C | -2.048741 | -1.726451 | 2.193322  |
| O | -4.831641 | -2.155059 | -1.422779 |
| O | 1.407095  | -0.261601 | -0.174044 |
| C | 2.400016  | -1.117739 | 0.113719  |
| O | 2.354656  | -1.885860 | 1.041841  |
| C | 3.526340  | -1.009573 | -0.876471 |
| C | 4.883521  | -1.446543 | -0.329874 |
| C | 5.891817  | -1.564198 | -1.467948 |
| C | 5.383682  | -0.487338 | 0.746074  |
| H | -4.546807 | -1.371560 | 0.464411  |
| H | -2.817059 | -0.472611 | -1.906014 |
| H | -3.439148 | 1.522007  | 1.643982  |
| H | -4.675767 | 2.184105  | 0.601198  |
| H | -2.404346 | -2.915016 | -1.037039 |
| H | -3.250103 | -3.426807 | 0.427924  |
| H | -4.805014 | 0.515459  | 1.152007  |
| H | -1.258405 | 1.077584  | 1.258304  |
| H | 0.510840  | -0.500102 | 1.669320  |
| H | -0.603349 | -1.538482 | -0.956614 |
| H | 0.948487  | 1.897383  | 2.938981  |
| H | 1.785361  | 3.332819  | 2.118286  |
| H | -2.492631 | 2.853491  | -0.370697 |
| H | -0.747020 | 0.672665  | -1.564376 |
| H | -2.599256 | 2.172394  | -1.984113 |
| H | -1.226533 | -1.271497 | 2.742170  |
| H | -2.259859 | -2.698570 | 2.644066  |
| H | -2.938136 | -1.110806 | 2.349537  |
| H | -5.173275 | -2.988719 | -1.080555 |
| H | 3.240571  | -1.641423 | -1.723418 |
| H | 3.566199  | 0.012823  | -1.255888 |
| H | 4.756008  | -2.433172 | 0.121705  |

|   |          |           |           |
|---|----------|-----------|-----------|
| H | 6.862468 | -1.891643 | -1.092750 |
| H | 5.561630 | -2.282776 | -2.220160 |
| H | 6.034367 | -0.600581 | -1.963530 |
| H | 6.340762 | -0.822536 | 1.148631  |
| H | 4.681947 | -0.412120 | 1.577676  |
| H | 5.527805 | 0.514011  | 0.332228  |

CAM-B3LYP energy = -1154.93047800 a.u.

(2S,6R,7S,8R)-1, Conf. G

|   |           |           |           |
|---|-----------|-----------|-----------|
| C | -3.658692 | -1.934908 | -0.454818 |
| C | -3.184840 | -0.654175 | -1.071138 |
| C | -3.327201 | 0.579810  | -0.597427 |
| C | -4.236621 | 0.971687  | 0.530896  |
| C | -1.524580 | -1.879277 | 0.888207  |
| C | -2.437042 | -2.744053 | 0.057179  |
| C | -0.976124 | 1.441927  | -0.919971 |
| C | -0.548461 | 1.225937  | 0.552456  |
| C | 0.245443  | -0.073560 | 0.793277  |
| C | -0.508154 | -1.266289 | 0.291216  |
| O | -0.233404 | 2.600373  | -1.388492 |
| C | 0.440278  | 3.212625  | -0.403503 |
| C | 0.238916  | 2.466440  | 0.862955  |
| O | 1.084226  | 4.210624  | -0.595373 |
| C | 0.699606  | 2.903744  | 2.021592  |
| C | -2.466224 | 1.702157  | -1.147916 |
| C | -1.951596 | -1.634406 | 2.304013  |
| O | -4.434181 | -2.731960 | -1.350958 |
| O | 1.480263  | 0.061648  | 0.057020  |
| C | 2.564134  | -0.585761 | 0.513230  |
| O | 2.546636  | -1.281745 | 1.497333  |
| C | 3.773957  | -0.286853 | -0.328420 |
| C | 4.882751  | -1.331491 | -0.231630 |
| C | 4.456895  | -2.655429 | -0.859103 |
| C | 6.155657  | -0.803293 | -0.885057 |
| H | -4.327888 | -1.738313 | 0.379234  |
| H | -2.517806 | -0.799431 | -1.919483 |
| H | -3.674815 | 1.370909  | 1.379138  |
| H | -4.858266 | 0.154622  | 0.888090  |
| H | -1.898221 | -3.117840 | -0.816874 |
| H | -2.807399 | -3.605151 | 0.616221  |
| H | -4.898806 | 1.775004  | 0.198456  |
| H | -1.426894 | 1.164421  | 1.191662  |
| H | 0.483340  | -0.145789 | 1.852804  |
| H | -0.289315 | -1.519075 | -0.740868 |
| H | 0.535908  | 2.364612  | 2.945680  |
| H | 1.260527  | 3.828304  | 2.069901  |
| H | -2.731249 | 2.645971  | -0.667693 |
| H | -0.646385 | 0.618559  | -1.546725 |
| H | -2.626267 | 1.834786  | -2.219361 |
| H | -2.073947 | -2.586151 | 2.825497  |
| H | -2.921220 | -1.131582 | 2.342354  |
| H | -1.240247 | -1.031369 | 2.864831  |
| H | -3.904500 | -2.922432 | -2.133897 |
| H | 3.455552  | -0.147592 | -1.363121 |
| H | 4.141556  | 0.686302  | 0.011604  |
| H | 5.084951  | -1.502827 | 0.828251  |

|   |          |           |           |
|---|----------|-----------|-----------|
| H | 5.246735 | -3.401732 | -0.760785 |
| H | 3.560002 | -3.056676 | -0.385985 |
| H | 4.250433 | -2.527048 | -1.924816 |
| H | 6.961370 | -1.534951 | -0.809816 |
| H | 6.493587 | 0.119923  | -0.411113 |
| H | 5.992329 | -0.595969 | -1.945655 |

CAM-B3LYP energy = -1154.93044824 a.u.

(2S,6R,7S,8R)-1, Conf. H

|   |           |           |           |
|---|-----------|-----------|-----------|
| C | -3.661909 | -1.925906 | -0.463986 |
| C | -3.194448 | -0.646958 | -1.078238 |
| C | -3.326065 | 0.582700  | -0.590684 |
| C | -4.223431 | 0.971008  | 0.548712  |
| C | -1.524175 | -1.876655 | 0.879027  |
| C | -2.435058 | -2.734407 | 0.039692  |
| C | -0.976309 | 1.448062  | -0.917655 |
| C | -0.544540 | 1.230994  | 0.553447  |
| C | 0.246580  | -0.070556 | 0.791414  |
| C | -0.509533 | -1.259053 | 0.283781  |
| O | -0.236370 | 2.608262  | -1.386688 |
| C | 0.441557  | 3.218518  | -0.403550 |
| C | 0.245610  | 2.470075  | 0.862463  |
| O | 1.084737  | 4.216917  | -0.596198 |
| C | 0.712048  | 2.904929  | 2.019720  |
| C | -2.467138 | 1.706163  | -1.142192 |
| C | -1.946881 | -1.644288 | 2.298152  |
| O | -4.367118 | -2.675616 | -1.455572 |
| O | 1.482590  | 0.063673  | 0.056839  |
| C | 2.563764  | -0.589030 | 0.511645  |
| O | 2.543367  | -1.287411 | 1.494048  |
| C | 3.774950  | -0.292859 | -0.329033 |
| C | 4.880992  | -1.340393 | -0.232057 |
| C | 4.452227  | -2.662986 | -0.860397 |
| C | 6.155650  | -0.815148 | -0.884462 |
| H | -4.328264 | -1.730624 | 0.377576  |
| H | -2.543590 | -0.793394 | -1.937084 |
| H | -3.652644 | 1.357633  | 1.396782  |
| H | -4.848328 | 0.155096  | 0.902708  |
| H | -1.904763 | -3.095136 | -0.843118 |
| H | -2.795642 | -3.603726 | 0.595852  |
| H | -4.881435 | 1.782786  | 0.228772  |
| H | -1.421190 | 1.170953  | 1.195160  |
| H | 0.483105  | -0.146920 | 1.850921  |
| H | -0.294558 | -1.503865 | -0.750969 |
| H | 0.552242  | 2.364292  | 2.943611  |
| H | 1.273952  | 3.828942  | 2.067041  |
| H | -2.732296 | 2.649725  | -0.661528 |
| H | -0.647308 | 0.625794  | -1.546190 |
| H | -2.629302 | 1.838073  | -2.213381 |
| H | -2.067066 | -2.600518 | 2.811982  |
| H | -2.916604 | -1.142367 | 2.343486  |
| H | -1.233932 | -1.045783 | 2.861853  |
| H | -4.627390 | -3.521018 | -1.073070 |
| H | 3.457509  | -0.152361 | -1.363871 |
| H | 4.144837  | 0.679233  | 0.011541  |
| H | 5.082126  | -1.512738 | 0.827868  |

|   |          |           |           |
|---|----------|-----------|-----------|
| H | 5.240193 | -3.411262 | -0.761988 |
| H | 3.554076 | -3.062215 | -0.387991 |
| H | 4.246663 | -2.533603 | -1.926157 |
| H | 6.959460 | -1.548883 | -0.809025 |
| H | 6.495639 | 0.107021  | -0.409945 |
| H | 5.993510 | -0.606993 | -1.945078 |

CAM-B3LYP energy = -1154.93039748 a.u.

(2*S*,6*R*,7*S*,8*R*)-1, Conf. I

|   |           |           |           |
|---|-----------|-----------|-----------|
| C | -4.171143 | -0.906137 | -0.556142 |
| C | -3.302930 | 0.216595  | -1.036312 |
| C | -3.020675 | 1.353724  | -0.407800 |
| C | -3.735398 | 1.870153  | 0.807025  |
| C | -2.119641 | -1.744686 | 0.651203  |
| C | -3.286543 | -2.136338 | -0.218167 |
| C | -0.521898 | 1.420528  | -0.754747 |
| C | -0.173912 | 0.870561  | 0.649910  |
| C | 0.153823  | -0.635516 | 0.666349  |
| C | -0.965826 | -1.432871 | 0.070898  |
| O | 0.564331  | 2.317193  | -1.114319 |
| C | 1.410919  | 2.533104  | -0.096633 |
| C | 0.978939  | 1.733010  | 1.075596  |
| O | 2.351702  | 3.276604  | -0.195904 |
| C | 1.558915  | 1.840620  | 2.257901  |
| C | -1.838308 | 2.191989  | -0.858997 |
| C | -2.412365 | -1.563524 | 2.110261  |
| O | -5.180104 | -1.273111 | -1.498255 |
| O | 1.344781  | -0.797374 | -0.133378 |
| C | 2.129481  | -1.859419 | 0.104313  |
| O | 1.889073  | -2.672219 | 0.962908  |
| C | 3.315371  | -1.891693 | -0.817263 |
| C | 4.239912  | -0.673368 | -0.682999 |
| C | 4.800052  | -0.549925 | 0.730090  |
| C | 5.361739  | -0.762709 | -1.711677 |
| H | -4.725437 | -0.613039 | 0.332062  |
| H | -2.733079 | -0.026085 | -1.931915 |
| H | -4.096039 | 2.882815  | 0.609945  |
| H | -3.062770 | 1.947732  | 1.664991  |
| H | -2.922822 | -2.550794 | -1.161497 |
| H | -3.916735 | -2.890019 | 0.257246  |
| H | -4.589622 | 1.263626  | 1.096998  |
| H | -1.017579 | 1.001754  | 1.324024  |
| H | 0.383000  | -0.934166 | 1.687704  |
| H | -0.861769 | -1.604399 | -0.995352 |
| H | 1.227162  | 1.268804  | 3.114877  |
| H | 2.393264  | 2.516466  | 2.395162  |
| H | -1.763545 | 3.091248  | -0.244707 |
| H | -0.499121 | 0.630104  | -1.498974 |
| H | -1.956923 | 2.521700  | -1.892667 |
| H | -2.850487 | -2.477212 | 2.517571  |
| H | -3.145209 | -0.768703 | 2.270610  |
| H | -1.526923 | -1.324239 | 2.696029  |
| H | -4.753471 | -1.539124 | -2.321204 |
| H | 3.865844  | -2.808372 | -0.605840 |
| H | 2.939528  | -1.950878 | -1.841109 |
| H | 3.647789  | 0.218870  | -0.898854 |

|   |          |           |           |
|---|----------|-----------|-----------|
| H | 5.445299 | 0.325720  | 0.812623  |
| H | 4.009078 | -0.447380 | 1.475291  |
| H | 5.393533 | -1.430178 | 0.989354  |
| H | 6.013458 | 0.109964  | -1.649504 |
| H | 4.967064 | -0.816862 | -2.727641 |
| H | 5.975176 | -1.650677 | -1.540484 |

CAM-B3LYP energy = -1154.93005497 a.u.

(2*S*,6*R*,7*S*,8*R*)-1, Conf. J

|   |           |           |           |
|---|-----------|-----------|-----------|
| C | -3.592414 | -1.704456 | -0.484665 |
| C | -2.938857 | -0.546289 | -1.174476 |
| C | -3.024029 | 0.742930  | -0.860840 |
| C | -4.017518 | 1.335528  | 0.096180  |
| C | -1.631015 | -1.648596 | 1.102159  |
| C | -2.516448 | -2.535326 | 0.265111  |
| C | -0.583663 | 1.379152  | -0.980528 |
| C | -0.352668 | 1.308493  | 0.548733  |
| C | 0.292384  | -0.006568 | 1.028063  |
| C | -0.501912 | -1.191008 | 0.571732  |
| O | 0.309990  | 2.413700  | -1.474202 |
| C | 0.909475  | 3.091055  | -0.483700 |
| C | 0.493533  | 2.518707  | 0.820493  |
| O | 1.654891  | 4.010453  | -0.699357 |
| C | 0.845563  | 3.059023  | 1.973808  |
| C | -2.008223 | 1.722958  | -1.419686 |
| C | -2.192892 | -1.203124 | 2.418522  |
| O | -4.324636 | -2.544330 | -1.378253 |
| O | 1.609862  | -0.054311 | 0.439622  |
| C | 2.569903  | -0.732461 | 1.087289  |
| O | 2.387393  | -1.273598 | 2.150061  |
| C | 3.862225  | -0.727466 | 0.322407  |
| C | 3.784883  | -1.492112 | -1.007905 |
| C | 5.109449  | -1.365508 | -1.752101 |
| C | 3.414939  | -2.956053 | -0.793238 |
| H | -4.335380 | -1.359834 | 0.230489  |
| H | -2.196329 | -0.842070 | -1.913787 |
| H | -3.523126 | 1.790972  | 0.958094  |
| H | -4.562898 | 2.140458  | -0.402815 |
| H | -1.915836 | -3.054214 | -0.485906 |
| H | -3.025873 | -3.290437 | 0.866351  |
| H | -4.746326 | 0.616745  | 0.461940  |
| H | -1.303041 | 1.383047  | 1.072761  |
| H | 0.400971  | 0.031210  | 2.110186  |
| H | -0.191344 | -1.580418 | -0.392149 |
| H | 0.526004  | 2.647808  | 2.922610  |
| H | 1.472985  | 3.940937  | 1.992262  |
| H | -2.240704 | 2.734367  | -1.081230 |
| H | -0.259526 | 0.464200  | -1.467453 |
| H | -2.031784 | 1.739129  | -2.510722 |
| H | -1.497653 | -0.595239 | 2.994147  |
| H | -2.462061 | -2.072896 | 3.021629  |
| H | -3.109511 | -0.624180 | 2.280332  |
| H | -3.722355 | -2.880966 | -2.052030 |
| H | 4.136452  | 0.311023  | 0.127280  |
| H | 4.624419  | -1.167648 | 0.965295  |
| H | 3.005434  | -1.023268 | -1.613490 |

|   |          |           |           |
|---|----------|-----------|-----------|
| H | 5.061857 | -1.876998 | -2.714590 |
| H | 5.364095 | -0.320741 | -1.937523 |
| H | 5.922639 | -1.813744 | -1.175917 |
| H | 3.359671 | -3.481581 | -1.747515 |
| H | 2.448235 | -3.066222 | -0.298698 |
| H | 4.164682 | -3.458010 | -0.176683 |

CAM-B3LYP energy = -1154.93003552 a.u.

(2*S*,6*R*,7*S*,8*R*)-1, Conf. K

|   |           |           |           |
|---|-----------|-----------|-----------|
| C | -4.173844 | -0.896281 | -0.559218 |
| C | -3.313212 | 0.226731  | -1.038710 |
| C | -3.021754 | 1.354898  | -0.398660 |
| C | -3.725510 | 1.863085  | 0.826191  |
| C | -2.118005 | -1.743595 | 0.638993  |
| C | -3.282526 | -2.127007 | -0.236605 |
| C | -0.523383 | 1.425557  | -0.753119 |
| C | -0.170518 | 0.872174  | 0.648983  |
| C | 0.155493  | -0.634192 | 0.660568  |
| C | -0.964958 | -1.426288 | 0.060151  |
| O | 0.560317  | 2.325355  | -1.113021 |
| C | 1.410621  | 2.538074  | -0.097910 |
| C | 0.983848  | 1.733335  | 1.073101  |
| O | 2.350435  | 3.282754  | -0.197927 |
| C | 1.568555  | 1.837152  | 2.253414  |
| C | -1.841359 | 2.194843  | -0.852004 |
| C | -2.408782 | -1.577865 | 2.100240  |
| O | -5.107686 | -1.225969 | -1.589816 |
| O | 1.347277  | -0.795329 | -0.138122 |
| C | 2.129267  | -1.859901 | 0.096824  |
| O | 1.885798  | -2.675344 | 0.952115  |
| C | 3.316800  | -1.891153 | -0.822597 |
| C | 4.246349  | -0.677791 | -0.677619 |
| C | 4.804164  | -0.566783 | 0.737398  |
| C | 5.369932  | -0.764730 | -1.704603 |
| H | -4.720730 | -0.607946 | 0.339733  |
| H | -2.759320 | -0.011247 | -1.943837 |
| H | -4.077359 | 2.881401  | 0.642961  |
| H | -3.048624 | 1.923919  | 1.682155  |
| H | -2.924441 | -2.521313 | -1.188917 |
| H | -3.904231 | -2.893392 | 0.233527  |
| H | -4.583653 | 1.260440  | 1.112542  |
| H | -1.011857 | 1.002056  | 1.326206  |
| H | 0.382589  | -0.937278 | 1.681050  |
| H | -0.862924 | -1.587570 | -1.007807 |
| H | 1.240676  | 1.262215  | 3.109783  |
| H | 2.403109  | 2.512971  | 2.389559  |
| H | -1.765758 | 3.093647  | -0.237135 |
| H | -0.501474 | 0.637495  | -1.499825 |
| H | -1.963701 | 2.524995  | -1.885069 |
| H | -2.846027 | -2.495928 | 2.498715  |
| H | -3.141580 | -0.785016 | 2.269896  |
| H | -1.522415 | -1.344642 | 2.687103  |
| H | -5.633052 | -1.979714 | -1.298719 |
| H | 3.862894  | -2.811614 | -0.616344 |
| H | 2.942998  | -1.941281 | -1.847642 |
| H | 3.658499  | 0.218497  | -0.888357 |

|   |          |           |           |
|---|----------|-----------|-----------|
| H | 5.453033 | 0.305450  | 0.827350  |
| H | 4.012237 | -0.466107 | 1.481836  |
| H | 5.393315 | -1.451416 | 0.991584  |
| H | 6.025397 | 0.104561  | -1.634835 |
| H | 4.977140 | -0.809839 | -2.721728 |
| H | 5.979048 | -1.656638 | -1.538520 |

CAM-B3LYP energy = -1154.92999862 a.u.

(2*S*,6*R*,7*S*,8*R*)-1, Conf. L

|   |           |           |           |
|---|-----------|-----------|-----------|
| C | -3.601503 | -1.686865 | -0.493018 |
| C | -2.950134 | -0.532644 | -1.182101 |
| C | -3.023023 | 0.753728  | -0.854626 |
| C | -4.006075 | 1.347351  | 0.112709  |
| C | -1.633472 | -1.650046 | 1.088609  |
| C | -2.520012 | -2.525755 | 0.241846  |
| C | -0.580756 | 1.384111  | -0.977810 |
| C | -0.347389 | 1.307717  | 0.550816  |
| C | 0.293309  | -0.011555 | 1.024095  |
| C | -0.504727 | -1.190015 | 0.559470  |
| O | 0.313758  | 2.419192  | -1.469175 |
| C | 0.917104  | 3.091019  | -0.477387 |
| C | 0.503001  | 2.514271  | 0.825486  |
| O | 1.664072  | 4.009701  | -0.690934 |
| C | 0.859196  | 3.048827  | 1.980201  |
| C | -2.005259 | 1.731284  | -1.414178 |
| C | -2.190356 | -1.217041 | 2.411190  |
| O | -4.259480 | -2.490294 | -1.475019 |
| O | 1.611403  | -0.060342 | 0.437058  |
| C | 2.569608  | -0.741382 | 1.084223  |
| O | 2.384979  | -1.285437 | 2.145190  |
| C | 3.863138  | -0.735459 | 0.321401  |
| C | 3.787438  | -1.497243 | -1.010643 |
| C | 5.113107  | -1.369327 | -1.752646 |
| C | 3.416812  | -2.961522 | -0.799571 |
| H | -4.336151 | -1.339216 | 0.234901  |
| H | -2.222219 | -0.833305 | -1.932059 |
| H | -4.739538 | 0.631937  | 0.475608  |
| H | -4.545825 | 2.161703  | -0.377042 |
| H | -1.929805 | -3.030330 | -0.524818 |
| H | -3.020360 | -3.290928 | 0.841121  |
| H | -3.503902 | 1.790795  | 0.976337  |
| H | -1.296574 | 1.383638  | 1.076703  |
| H | 0.400599  | 0.019795  | 2.106521  |
| H | -0.198419 | -1.570840 | -0.409057 |
| H | 0.540816  | 2.634362  | 2.927987  |
| H | 1.488947  | 3.929026  | 2.000922  |
| H | -2.234713 | 2.743197  | -1.075128 |
| H | -0.258990 | 0.470384  | -1.468498 |
| H | -2.030456 | 1.747388  | -2.505150 |
| H | -1.490583 | -0.619428 | 2.992093  |
| H | -2.462657 | -2.092207 | 3.005093  |
| H | -3.104231 | -0.631948 | 2.281324  |
| H | -4.643124 | -3.258001 | -1.036558 |
| H | 4.138207  | 0.303298  | 0.128903  |
| H | 4.624119  | -1.177440 | 0.964504  |
| H | 3.008951  | -1.026948 | -1.616332 |

|   |          |           |           |
|---|----------|-----------|-----------|
| H | 5.066815 | -1.878810 | -2.716256 |
| H | 5.368163 | -0.324207 | -1.935537 |
| H | 5.925401 | -1.818858 | -1.176195 |
| H | 3.363086 | -3.485076 | -1.755012 |
| H | 2.449176 | -3.072398 | -0.307029 |
| H | 4.165372 | -3.464876 | -0.182699 |

CAM-B3LYP energy = -1154.92998489 a.u.

(2S,6R,7S,8R)-1, Conf. M

|   |           |           |           |
|---|-----------|-----------|-----------|
| C | -4.092654 | -1.198547 | -0.375711 |
| C | -3.389722 | 0.022723  | -0.881579 |
| C | -3.168935 | 1.161228  | -0.230050 |
| C | -3.821259 | 1.559714  | 1.062349  |
| C | -1.880732 | -1.863372 | 0.620847  |
| C | -3.071587 | -2.340145 | -0.170102 |
| C | -0.726414 | 1.504428  | -0.773515 |
| C | -0.212089 | 0.940559  | 0.573941  |
| C | 0.262786  | -0.523593 | 0.499604  |
| C | -0.821181 | -1.406891 | -0.037598 |
| O | 0.227306  | 2.527895  | -1.169499 |
| C | 1.126336  | 2.792240  | -0.209727 |
| C | 0.876414  | 1.903164  | 0.950957  |
| O | 1.972774  | 3.636885  | -0.343316 |
| C | 1.535718  | 2.023765  | 2.089534  |
| C | -2.121342 | 2.132442  | -0.743209 |
| C | -2.060678 | -1.773904 | 2.106309  |
| O | -5.052896 | -1.701757 | -1.309576 |
| O | 1.392154  | -0.540140 | -0.400615 |
| C | 2.272093  | -1.548524 | -0.286946 |
| O | 2.171024  | -2.409713 | 0.552285  |
| C | 3.370801  | -1.460553 | -1.309730 |
| C | 4.725613  | -1.000322 | -0.735691 |
| C | 4.637706  | 0.387909  | -0.110423 |
| C | 5.330285  | -2.009807 | 0.234271  |
| H | -4.591247 | -0.994234 | 0.573182  |
| H | -2.886095 | -0.133051 | -1.832963 |
| H | -4.585524 | 0.861591  | 1.394219  |
| H | -4.290509 | 2.539367  | 0.942338  |
| H | -2.757993 | -2.672310 | -1.161162 |
| H | -3.580437 | -3.172923 | 0.318924  |
| H | -3.087306 | 1.669829  | 1.864721  |
| H | -1.007760 | 0.957731  | 1.315483  |
| H | 0.603780  | -0.832526 | 1.486084  |
| H | -0.798823 | -1.518930 | -1.116412 |
| H | 1.335462  | 1.384110  | 2.939361  |
| H | 2.303727  | 2.779035  | 2.196486  |
| H | -2.089816 | 3.017409  | -0.104878 |
| H | -0.678256 | 0.752089  | -1.555197 |
| H | -2.359480 | 2.476008  | -1.751423 |
| H | -2.861437 | -1.076063 | 2.364243  |
| H | -1.159167 | -1.455332 | 2.626094  |
| H | -2.355402 | -2.746946 | 2.505134  |
| H | -5.723554 | -1.024005 | -1.446538 |
| H | 3.484606  | -2.455817 | -1.741575 |
| H | 3.060989  | -0.778002 | -2.099357 |
| H | 5.389337  | -0.935003 | -1.601882 |

|   |          |           |           |
|---|----------|-----------|-----------|
| H | 5.627476 | 0.733677  | 0.191011  |
| H | 4.224219 | 1.116635  | -0.809397 |
| H | 4.005007 | 0.384636  | 0.780272  |
| H | 6.329655 | -1.690780 | 0.534626  |
| H | 5.414619 | -2.997490 | -0.222225 |
| H | 4.724090 | -2.109170 | 1.135437  |

CAM-B3LYP energy = -1154.92879666 a.u.

(2S,6R,7S,8R)-1, Conf. N

|   |           |           |           |
|---|-----------|-----------|-----------|
| C | -3.397125 | -2.021798 | -0.324003 |
| C | -2.967773 | -0.762500 | -1.010732 |
| C | -3.169872 | 0.490306  | -0.611922 |
| C | -4.112650 | 0.909792  | 0.478791  |
| C | -1.295682 | -1.808569 | 1.040954  |
| C | -2.160431 | -2.752317 | 0.245706  |
| C | -0.849691 | 1.431435  | -0.947032 |
| C | -0.440461 | 1.313260  | 0.541854  |
| C | 0.399132  | 0.062126  | 0.867216  |
| C | -0.300798 | -1.183658 | 0.420551  |
| O | -0.148972 | 2.594984  | -1.465139 |
| C | 0.480357  | 3.287253  | -0.504103 |
| C | 0.288721  | 2.600935  | 0.797266  |
| O | 1.084179  | 4.300999  | -0.739185 |
| C | 0.709533  | 3.118938  | 1.937674  |
| C | -2.345354 | 1.613558  | -1.214157 |
| C | -1.743823 | -1.514606 | 2.440658  |
| O | -4.015880 | -2.948801 | -1.221167 |
| O | 1.642465  | 0.204804  | 0.146473  |
| C | 2.744676  | -0.358508 | 0.668060  |
| O | 2.736859  | -0.966037 | 1.710759  |
| C | 3.955377  | -0.137522 | -0.195311 |
| C | 4.392716  | -1.387572 | -0.985444 |
| C | 4.907240  | -2.504771 | -0.084009 |
| C | 3.293560  | -1.888353 | -1.917025 |
| H | -4.086192 | -1.802526 | 0.493336  |
| H | -2.287368 | -0.934696 | -1.841648 |
| H | -4.715406 | 0.092318  | 0.866000  |
| H | -4.791699 | 1.675134  | 0.094848  |
| H | -1.602209 | -3.149780 | -0.603528 |
| H | -2.505505 | -3.595378 | 0.847032  |
| H | -3.579490 | 1.367364  | 1.316085  |
| H | -1.327076 | 1.248216  | 1.169100  |
| H | 0.620041  | 0.056395  | 1.932701  |
| H | -0.066739 | -1.476188 | -0.597307 |
| H | 0.552380  | 2.623121  | 2.886839  |
| H | 1.229689  | 4.068239  | 1.944722  |
| H | -2.658363 | 2.571909  | -0.795544 |
| H | -0.472840 | 0.591383  | -1.522944 |
| H | -2.490332 | 1.675578  | -2.294160 |
| H | -1.068844 | -0.847737 | 2.973464  |
| H | -1.820589 | -2.443963 | 3.009192  |
| H | -2.738764 | -1.062310 | 2.448381  |
| H | -4.808770 | -2.536049 | -1.580009 |
| H | 3.748564  | 0.676129  | -0.888462 |
| H | 4.767355  | 0.170488  | 0.464524  |
| H | 5.227596  | -1.050345 | -1.605289 |

|   |          |           |           |
|---|----------|-----------|-----------|
| H | 5.292301 | -3.328341 | -0.687515 |
| H | 5.714309 | -2.154139 | 0.561501  |
| H | 4.115259 | -2.897709 | 0.554695  |
| H | 3.666584 | -2.697234 | -2.546682 |
| H | 2.928477 | -1.093634 | -2.569507 |
| H | 2.442525 | -2.278416 | -1.353709 |

CAM-B3LYP energy = -1154.92878529 a.u.

(2S,6R,7S,8R)-1, Conf. O

|   |           |           |           |
|---|-----------|-----------|-----------|
| C | -4.148740 | -1.356570 | 0.238596  |
| C | -3.651423 | 0.059513  | 0.066502  |
| C | -3.103022 | 0.628098  | -1.002970 |
| C | -3.072477 | 0.025256  | -2.376942 |
| C | -1.770640 | -1.827300 | 0.942111  |
| C | -2.979464 | -2.375031 | 0.232329  |
| C | -0.842411 | 1.673252  | -0.693650 |
| C | -0.383127 | 1.159448  | 0.694784  |
| C | 0.195494  | -0.265813 | 0.701388  |
| C | -0.822808 | -1.244904 | 0.215072  |
| O | -0.155539 | 2.938017  | -0.902670 |
| C | 0.668364  | 3.257581  | 0.104335  |
| C | 0.590710  | 2.210072  | 1.150412  |
| O | 1.332539  | 4.260926  | 0.091291  |
| C | 1.291516  | 2.281874  | 2.268247  |
| C | -2.344694 | 1.925866  | -0.852395 |
| C | -1.832802 | -1.802102 | 2.439794  |
| O | -5.062019 | -1.807448 | -0.762867 |
| O | 1.340810  | -0.250363 | -0.177923 |
| C | 2.314588  | -1.147826 | 0.040405  |
| O | 2.296950  | -1.924436 | 0.962402  |
| C | 3.379280  | -1.071369 | -1.018802 |
| C | 4.745411  | -1.588164 | -0.574923 |
| C | 5.667280  | -1.730362 | -1.781670 |
| C | 5.366539  | -0.680616 | 0.482543  |
| H | -4.646205 | -1.410309 | 1.211169  |
| H | -3.609316 | 0.617043  | 0.997849  |
| H | -3.568117 | -0.939659 | -2.414089 |
| H | -2.046413 | -0.089549 | -2.735782 |
| H | -2.737379 | -2.574111 | -0.811834 |
| H | -3.331888 | -3.305909 | 0.680556  |
| H | -3.571303 | 0.694417  | -3.083139 |
| H | -1.240426 | 1.137445  | 1.368110  |
| H | 0.538566  | -0.497932 | 1.707110  |
| H | -0.885567 | -1.316397 | -0.865586 |
| H | 1.231261  | 1.522733  | 3.037234  |
| H | 1.954864  | 3.119901  | 2.439350  |
| H | -2.699090 | 2.490998  | 0.011279  |
| H | -0.482485 | 1.019344  | -1.485283 |
| H | -2.477545 | 2.551235  | -1.737464 |
| H | -0.892617 | -1.504354 | 2.899608  |
| H | -2.607786 | -1.112946 | 2.788366  |
| H | -2.098846 | -2.789993 | 2.820635  |
| H | -5.818272 | -1.210734 | -0.771015 |
| H | 3.006664  | -1.666735 | -1.858292 |
| H | 3.445785  | -0.043003 | -1.377993 |
| H | 4.597949  | -2.577289 | -0.135099 |

|   |          |           |           |
|---|----------|-----------|-----------|
| H | 6.642461 | -2.115772 | -1.480551 |
| H | 5.250105 | -2.412969 | -2.524148 |
| H | 5.826720 | -0.763784 | -2.266293 |
| H | 6.331302 | -1.071382 | 0.809530  |
| H | 4.728565 | -0.591498 | 1.362655  |
| H | 5.531634 | 0.322219  | 0.080242  |

CAM-B3LYP energy = -1154.92873763 a.u.

(2S,6R,7S,8R)-1, Conf. P

|   |           |           |           |
|---|-----------|-----------|-----------|
| C | -3.693349 | -1.919836 | -0.347610 |
| C | -3.274321 | -0.607453 | -0.933791 |
| C | -3.376613 | 0.598784  | -0.382500 |
| C | -4.184885 | 0.925932  | 0.839893  |
| C | -1.451891 | -1.935053 | 0.793455  |
| C | -2.441900 | -2.754716 | 0.006762  |
| C | -1.061651 | 1.481716  | -0.869347 |
| C | -0.500477 | 1.179361  | 0.541553  |
| C | 0.311891  | -0.127832 | 0.626609  |
| C | -0.493651 | -1.291386 | 0.135950  |
| O | -0.360851 | 2.667388  | -1.334566 |
| C | 0.399843  | 3.223042  | -0.379884 |
| C | 0.310999  | 2.403501  | 0.853708  |
| O | 1.025945  | 4.232765  | -0.569980 |
| C | 0.870141  | 2.775355  | 1.991715  |
| C | -2.565150 | 1.753175  | -0.941922 |
| C | -1.740836 | -1.764092 | 2.254345  |
| O | -4.441561 | -2.715970 | -1.271568 |
| O | 1.465698  | 0.055414  | -0.219874 |
| C | 2.572483  | -0.658819 | 0.054047  |
| O | 2.640789  | -1.419675 | 0.985530  |
| C | 3.651804  | -0.353879 | -0.950519 |
| C | 4.993705  | -1.064517 | -0.766031 |
| C | 5.689278  | -0.677996 | 0.536933  |
| C | 4.884437  | -2.579048 | -0.924146 |
| H | -4.286924 | -1.770240 | 0.555833  |
| H | -2.687469 | -0.709785 | -1.843863 |
| H | -4.860662 | 1.754740  | 0.615065  |
| H | -3.549060 | 1.264761  | 1.661949  |
| H | -1.997001 | -3.080995 | -0.934698 |
| H | -2.763797 | -3.642898 | 0.553537  |
| H | -4.784983 | 0.092482  | 1.196082  |
| H | -1.315944 | 1.071292  | 1.253653  |
| H | 0.654140  | -0.259641 | 1.651390  |
| H | -0.376197 | -1.488044 | -0.924462 |
| H | 0.786810  | 2.182288  | 2.893279  |
| H | 1.432982  | 3.698410  | 2.045679  |
| H | -2.779884 | 2.665548  | -0.382264 |
| H | -0.794743 | 0.697412  | -1.571403 |
| H | -2.823620 | 1.950645  | -1.983790 |
| H | -1.831042 | -2.741462 | 2.733207  |
| H | -2.693760 | -1.251677 | 2.409523  |
| H | -0.969739 | -1.201745 | 2.777320  |
| H | -5.245140 | -2.236284 | -1.499548 |
| H | 3.235884  | -0.584799 | -1.934512 |
| H | 3.793853  | 0.729532  | -0.939605 |
| H | 5.617446  | -0.697905 | -1.586691 |

|   |          |           |           |
|---|----------|-----------|-----------|
| H | 6.693386 | -1.103895 | 0.572756  |
| H | 5.784288 | 0.406148  | 0.626525  |
| H | 5.136836 | -1.043679 | 1.402163  |
| H | 5.875630 | -3.035449 | -0.909553 |
| H | 4.410779 | -2.843133 | -1.871978 |
| H | 4.298625 | -3.018439 | -0.117264 |

CAM-B3LYP energy = -1154.92872925 a.u.

|   |           |           |           |
|---|-----------|-----------|-----------|
| H | -4.630249 | -2.530645 | 0.130168  |
| H | -6.740223 | -1.962721 | 1.325986  |
| H | -5.413968 | -2.215672 | 2.463188  |
| H | -5.948035 | -0.577242 | 2.076701  |
| H | -6.282193 | -1.062617 | -1.001056 |
| H | -4.643586 | -0.634010 | -1.486875 |
| H | -5.505224 | 0.361991  | -0.308059 |

CAM-B3LYP energy = -1154.93114223 a.u.

(2R,6R,7S,8R)-1, Conf. A

|   |           |           |           |
|---|-----------|-----------|-----------|
| C | 4.136118  | -1.396726 | 0.285066  |
| C | 3.635252  | 0.019213  | 0.229780  |
| C | 3.069041  | 0.717397  | 1.207144  |
| C | 3.004296  | 0.266137  | 2.636852  |
| C | 1.813494  | -1.913036 | -0.609757 |
| C | 2.967112  | -2.416857 | 0.217007  |
| C | 0.821455  | 1.713110  | 0.686793  |
| C | 0.423759  | 1.091566  | -0.676271 |
| C | -0.154653 | -0.331184 | -0.598989 |
| C | 0.832115  | -1.269788 | 0.015628  |
| O | 0.122757  | 2.986345  | 0.767922  |
| C | -0.655961 | 3.223744  | -0.296089 |
| C | -0.528719 | 2.100279  | -1.254751 |
| O | -1.322322 | 4.221437  | -0.389103 |
| C | -1.175607 | 2.084065  | -2.406765 |
| C | 2.314880  | 1.985622  | 0.888337  |
| C | 1.960821  | -2.008210 | -2.097937 |
| O | 5.002503  | -1.667229 | -0.820921 |
| O | -1.344471 | -0.249204 | 0.216206  |
| C | -2.318209 | -1.147473 | 0.001742  |
| O | -2.261986 | -1.982716 | -0.865931 |
| C | -3.439342 | -0.989914 | 0.991465  |
| C | -4.786481 | -1.515178 | 0.501571  |
| C | -5.777398 | -1.572913 | 1.659469  |
| C | -5.332116 | -0.664470 | -0.641513 |
| H | 4.681596  | -1.586622 | 1.213026  |
| H | 3.620143  | 0.432848  | -0.774982 |
| H | 1.974912  | 0.066182  | 2.946417  |
| H | 3.379645  | 1.052485  | 3.295650  |
| H | 2.627680  | -2.595981 | 1.237337  |
| H | 3.374724  | -3.353182 | -0.168004 |
| H | 3.584338  | -0.635723 | 2.820153  |
| H | 1.309231  | 1.020600  | -1.308649 |
| H | -0.447118 | -0.642895 | -1.598975 |
| H | 0.831969  | -1.259423 | 1.100977  |
| H | -1.077604 | 1.269656  | -3.112808 |
| H | -1.831227 | 2.903388  | -2.672132 |
| H | 2.710268  | 2.461520  | -0.010786 |
| H | 0.430106  | 1.120085  | 1.510952  |
| H | 2.407070  | 2.698661  | 1.709894  |
| H | 2.813582  | -1.415967 | -2.438106 |
| H | 1.074947  | -1.677563 | -2.636593 |
| H | 2.168267  | -3.041010 | -2.385778 |
| H | 5.734457  | -1.041313 | -0.793611 |
| H | -3.125668 | -1.536132 | 1.886614  |
| H | -3.508832 | 0.059934  | 1.281259  |

(2R,6R,7S,8R)-1, Conf. B

|   |           |           |           |
|---|-----------|-----------|-----------|
| C | -4.145872 | -1.385217 | -0.271234 |
| C | -3.647636 | 0.028037  | -0.231091 |
| C | -3.065649 | 0.708897  | -1.210478 |
| C | -2.985468 | 0.237613  | -2.633096 |
| C | -1.811064 | -1.909264 | 0.595567  |
| C | -2.964944 | -2.403816 | -0.234265 |
| C | -0.822593 | 1.717235  | -0.694026 |
| C | -0.427885 | 1.097454  | 0.670532  |
| C | 0.153814  | -0.324121 | 0.595353  |
| C | -0.829007 | -1.262471 | -0.025311 |
| O | -0.129564 | 2.993872  | -0.771987 |
| C | 0.645287  | 3.233512  | 0.294284  |
| C | 0.519877  | 2.108858  | 1.251893  |
| O | 1.307521  | 4.233745  | 0.389873  |
| C | 1.164080  | 2.094141  | 2.405429  |
| C | -2.316303 | 1.982349  | -0.901657 |
| C | -1.958241 | -2.012114 | 2.083430  |
| O | -5.010917 | -1.536624 | 0.856082  |
| O | 1.347702  | -0.239511 | -0.213590 |
| C | 2.318336  | -1.141193 | 0.000385  |
| O | 2.256223  | -1.980903 | 0.863346  |
| C | 3.444017  | -0.980680 | -0.983719 |
| C | 4.785589  | -1.522146 | -0.496487 |
| C | 5.778397  | -1.576556 | -1.652948 |
| C | 5.336221  | -0.687681 | 0.656165  |
| H | -4.715200 | -1.579555 | -1.184186 |
| H | -3.654974 | 0.456890  | 0.766601  |
| H | -3.555563 | -0.672454 | -2.807206 |
| H | -1.952514 | 0.044501  | -2.934708 |
| H | -2.633015 | -2.556363 | -1.261914 |
| H | -3.352720 | -3.359420 | 0.127864  |
| H | -3.365691 | 1.010380  | -3.305178 |
| H | -1.315834 | 1.024443  | 1.299266  |
| H | 0.441290  | -0.636290 | 1.596672  |
| H | -0.826611 | -1.246979 | -1.110452 |
| H | 1.067228  | 1.278849  | 3.110612  |
| H | 1.816195  | 2.915557  | 2.672955  |
| H | -2.715342 | 2.464615  | -0.007543 |
| H | -0.424714 | 1.126350  | -1.516589 |
| H | -2.408960 | 2.688130  | -1.729524 |
| H | -2.187585 | -3.042081 | 2.364731  |
| H | -2.796296 | -1.402950 | 2.430078  |
| H | -1.063628 | -1.705175 | 2.621713  |
| H | -5.374869 | -2.428049 | 0.845297  |
| H | 3.128766  | -1.513251 | -1.886498 |
| H | 3.522374  | 0.072069  | -1.260575 |



|   |          |           |           |
|---|----------|-----------|-----------|
| H | 4.620141 | -2.539969 | -0.135657 |
| H | 6.737349 | -1.977408 | -1.321393 |
| H | 5.411450 | -2.208415 | -2.463678 |
| H | 5.957951 | -0.578261 | -2.060037 |
| H | 6.281903 | -1.097874 | 1.013754  |
| H | 4.646104 | -0.659339 | 1.500267  |
| H | 5.519295 | 0.340399  | 0.333178  |

CAM-B3LYP energy = -1154.93113404 a.u.

(2R,6R,7S,8R)-1, Conf. C

|   |           |           |           |
|---|-----------|-----------|-----------|
| C | -3.829573 | -1.778339 | -0.319753 |
| C | -3.505830 | -0.313216 | -0.411562 |
| C | -2.924217 | 0.328171  | -1.418404 |
| C | -2.653324 | -0.281228 | -2.762677 |
| C | -1.568242 | -1.877522 | 0.837148  |
| C | -2.563741 | -2.623758 | -0.011523 |
| C | -0.879128 | 1.667010  | -0.835267 |
| C | -0.558639 | 1.264348  | 0.626767  |
| C | 0.192304  | -0.068311 | 0.784791  |
| C | -0.609730 | -1.194586 | 0.218855  |
| O | -0.333140 | 3.003374  | -1.013504 |
| C | 0.292168  | 3.462560  | 0.078871  |
| C | 0.198218  | 2.449776  | 1.157109  |
| O | 0.820419  | 4.543443  | 0.104588  |
| C | 0.714081  | 2.650378  | 2.356936  |
| C | -2.364331 | 1.714270  | -1.206218 |
| C | -1.856004 | -1.807504 | 2.306105  |
| O | -4.768988 | -2.020019 | 0.731943  |
| O | 1.436885  | 0.072426  | 0.065562  |
| C | 2.490242  | -0.649609 | 0.478040  |
| O | 2.439964  | -1.410200 | 1.412106  |
| C | 3.715728  | -0.345972 | -0.339316 |
| C | 4.772073  | -1.447890 | -0.324669 |
| C | 4.281650  | -2.699687 | -1.046174 |
| C | 6.068928  | -0.935656 | -0.942731 |
| H | -4.249637 | -2.149410 | -1.258114 |
| H | -3.647043 | 0.219162  | 0.525293  |
| H | -3.056925 | 0.357106  | -3.552002 |
| H | -3.088973 | -1.272032 | -2.872008 |
| H | -2.102184 | -2.883134 | -0.964466 |
| H | -2.898165 | -3.549329 | 0.460160  |
| H | -1.580121 | -0.368694 | -2.952650 |
| H | -1.492172 | 1.149256  | 1.178127  |
| H | 0.420284  | -0.216254 | 1.837998  |
| H | -0.500802 | -1.316395 | -0.853925 |
| H | 0.637750  | 1.915368  | 3.147778  |
| H | 1.234410  | 3.573743  | 2.576678  |
| H | -2.907870 | 2.239534  | -0.418837 |
| H | -0.333443 | 1.040069  | -1.537774 |
| H | -2.452665 | 2.303559  | -2.120958 |
| H | -2.802890 | -1.293659 | 2.487564  |
| H | -1.075792 | -1.300757 | 2.870695  |
| H | -1.969540 | -2.815202 | 2.711400  |
| H | -5.561972 | -1.501957 | 0.555918  |
| H | 3.407667  | -0.111703 | -1.359853 |
| H | 4.130144  | 0.578432  | 0.074774  |

|   |          |           |           |
|---|----------|-----------|-----------|
| H | 4.966390 | -1.706653 | 0.718830  |
| H | 5.035166 | -3.487891 | -1.008703 |
| H | 3.367990 | -3.092158 | -0.598457 |
| H | 4.078262 | -2.482675 | -2.098073 |
| H | 6.838934 | -1.708202 | -0.921911 |
| H | 6.450200 | -0.065473 | -0.405533 |
| H | 5.916077 | -0.646248 | -1.985492 |

CAM-B3LYP energy = -1154.93099040 a.u.

(2R,6R,7S,8R)-1, Conf. D

|   |           |           |           |
|---|-----------|-----------|-----------|
| C | -3.845550 | -1.761654 | -0.311850 |
| C | -3.520507 | -0.301799 | -0.418587 |
| C | -2.915253 | 0.321686  | -1.421849 |
| C | -2.622320 | -0.307706 | -2.752399 |
| C | -1.568989 | -1.875044 | 0.820573  |
| C | -2.566266 | -2.610072 | -0.033692 |
| C | -0.875608 | 1.671137  | -0.842840 |
| C | -0.560672 | 1.268270  | 0.620145  |
| C | 0.189829  | -0.064338 | 0.780172  |
| C | -0.609901 | -1.188296 | 0.207254  |
| O | -0.336150 | 3.010879  | -1.016370 |
| C | 0.284651  | 3.470009  | 0.078490  |
| C | 0.192756  | 2.454171  | 1.154162  |
| O | 0.808235  | 4.553105  | 0.108120  |
| C | 0.707530  | 2.653157  | 2.354718  |
| C | -2.358968 | 1.710718  | -1.221048 |
| C | -1.855773 | -1.815202 | 2.290256  |
| O | -4.800066 | -1.881838 | 0.744923  |
| O | 1.438397  | 0.077331  | 0.067914  |
| C | 2.487707  | -0.649347 | 0.482203  |
| O | 2.431100  | -1.413281 | 1.413236  |
| C | 3.717700  | -0.346709 | -0.328773 |
| C | 4.769407  | -1.453095 | -0.315313 |
| C | 4.276234  | -2.699741 | -1.043835 |
| C | 6.070442  | -0.943661 | -0.926855 |
| H | -4.291042 | -2.137473 | -1.236935 |
| H | -3.688570 | 0.243227  | 0.505599  |
| H | -3.015396 | 0.318020  | -3.557038 |
| H | -3.056433 | -1.300160 | -2.853189 |
| H | -2.114078 | -2.845103 | -0.998024 |
| H | -2.878081 | -3.554881 | 0.418681  |
| H | -1.546658 | -0.397340 | -2.926421 |
| H | -1.496864 | 1.152060  | 1.166964  |
| H | 0.411790  | -0.214547 | 1.834330  |
| H | -0.500431 | -1.303056 | -0.866084 |
| H | 0.633126  | 1.915834  | 3.143581  |
| H | 1.225030  | 3.577487  | 2.577068  |
| H | -2.906970 | 2.242157  | -0.440917 |
| H | -0.322530 | 1.048346  | -1.543279 |
| H | -2.444589 | 2.291300  | -2.141710 |
| H | -2.794559 | -1.288738 | 2.477058  |
| H | -1.067573 | -1.325617 | 2.858901  |
| H | -1.983558 | -2.824939 | 2.686229  |
| H | -5.057710 | -2.806525 | 0.821196  |
| H | 3.414712  | -0.106279 | -1.349390 |
| H | 4.134342  | 0.573920  | 0.091422  |

|   |          |           |           |
|---|----------|-----------|-----------|
| H | 4.959170 | -1.717134 | 0.727696  |
| H | 5.026345 | -3.491229 | -1.007228 |
| H | 3.359438 | -3.090337 | -0.600903 |
| H | 4.077309 | -2.477379 | -2.095474 |
| H | 6.837235 | -1.719408 | -0.906491 |
| H | 6.453374 | -0.077196 | -0.384858 |
| H | 5.922341 | -0.649487 | -1.968962 |

CAM-B3LYP energy = -1154.93098183 a.u.

(2R,6R,7S,8R)-1, Conf. E

|   |           |           |           |
|---|-----------|-----------|-----------|
| C | -4.321782 | -0.613522 | -0.399347 |
| C | -3.506545 | 0.634261  | -0.204554 |
| C | -2.776424 | 1.275606  | -1.109545 |
| C | -2.792374 | 0.968807  | -2.578380 |
| C | -2.198967 | -1.746999 | 0.418608  |
| C | -3.423215 | -1.878890 | -0.448774 |
| C | -0.369459 | 1.662116  | -0.502027 |
| C | -0.154150 | 0.829633  | 0.787203  |
| C | 0.082752  | -0.672659 | 0.557968  |
| C | -1.084390 | -1.288501 | -0.142966 |
| O | 0.608292  | 2.737797  | -0.455011 |
| C | 1.398478  | 2.678958  | 0.625253  |
| C | 0.993132  | 1.526115  | 1.464386  |
| O | 2.277000  | 3.478597  | 0.817307  |
| C | 1.591840  | 1.245481  | 2.608310  |
| C | -1.754238 | 2.294883  | -0.666817 |
| C | -2.390545 | -1.960626 | 1.889280  |
| O | -5.241932 | -0.786409 | 0.682461  |
| O | 1.270716  | -0.783422 | -0.255774 |
| C | 2.014806  | -1.893765 | -0.143437 |
| O | 1.745365  | -2.790804 | 0.617475  |
| C | 3.197957  | -1.865720 | -1.068646 |
| C | 4.167913  | -0.705571 | -0.803516 |
| C | 4.738871  | -0.767902 | 0.609277  |
| C | 5.280278  | -0.715450 | -1.846003 |
| H | -4.884073 | -0.575437 | -1.335895 |
| H | -3.413269 | 0.930400  | 0.836911  |
| H | -2.977071 | 1.881383  | -3.149762 |
| H | -3.552969 | 0.239612  | -2.848821 |
| H | -3.116018 | -2.022367 | -1.484818 |
| H | -4.043904 | -2.730136 | -0.163617 |
| H | -1.827290 | 0.581449  | -2.915916 |
| H | -1.045429 | 0.900885  | 1.411070  |
| H | 0.281138  | -1.145112 | 1.517220  |
| H | -1.064562 | -1.164912 | -1.221064 |
| H | 1.291717  | 0.409873  | 3.227242  |
| H | 2.413123  | 1.858982  | 2.955700  |
| H | -2.045525 | 2.757028  | 0.278096  |
| H | -0.111340 | 1.081329  | -1.385184 |
| H | -1.662341 | 3.088797  | -1.410601 |
| H | -3.092882 | -1.228862 | 2.295187  |
| H | -1.462482 | -1.898393 | 2.454088  |
| H | -2.832058 | -2.943415 | 2.067743  |
| H | -5.811228 | -0.010257 | 0.723857  |
| H | 3.714173  | -2.820051 | -0.964559 |
| H | 2.818477  | -1.795745 | -2.090493 |

|   |          |           |           |
|---|----------|-----------|-----------|
| H | 3.607745 | 0.226500  | -0.908633 |
| H | 5.419293 | 0.066167  | 0.786284  |
| H | 3.955676 | -0.720706 | 1.368167  |
| H | 5.297547 | -1.694942 | 0.760346  |
| H | 5.964027 | 0.120020  | -1.689121 |
| H | 4.878610 | -0.636997 | -2.857605 |
| H | 5.861768 | -1.638687 | -1.785137 |

CAM-B3LYP energy = -1154.93063255 a.u.

(2R,6R,7S,8R)-1, Conf. F

|   |           |           |           |
|---|-----------|-----------|-----------|
| C | 4.333863  | -0.592459 | 0.376256  |
| C | 3.518777  | 0.652838  | 0.195900  |
| C | 2.779897  | 1.275500  | 1.105849  |
| C | 2.792814  | 0.949951  | 2.570780  |
| C | 2.199623  | -1.740835 | -0.399373 |
| C | 3.425199  | -1.856928 | 0.466395  |
| C | 0.370637  | 1.667522  | 0.509543  |
| C | 0.154401  | 0.834013  | -0.778641 |
| C | -0.081473 | -0.668118 | -0.547426 |
| C | 1.084825  | -1.278472 | 0.158894  |
| O | -0.605408 | 2.744812  | 0.460956  |
| C | -1.396275 | 2.684932  | -0.618718 |
| C | -0.992827 | 1.530077  | -1.456140 |
| O | -2.273986 | 3.485272  | -0.811728 |
| C | -1.592643 | 1.248099  | -2.599144 |
| C | 1.756450  | 2.297871  | 0.673538  |
| C | 2.387766  | -1.969125 | -1.868482 |
| O | 5.219336  | -0.656319 | -0.743524 |
| O | -1.272376 | -0.779946 | 0.261923  |
| C | -2.012084 | -1.893139 | 0.149004  |
| O | -1.735328 | -2.791662 | -0.607561 |
| C | -3.200955 | -1.866092 | 1.066799  |
| C | -4.175495 | -0.712861 | 0.788133  |
| C | -4.735552 | -0.785941 | -0.628491 |
| C | -5.295556 | -0.723630 | 1.822350  |
| H | 4.925358  | -0.549893 | 1.294852  |
| H | 3.437805  | 0.965579  | -0.840956 |
| H | 3.553262  | 0.217383  | 2.832638  |
| H | 1.827365  | 0.559837  | 2.903926  |
| H | 3.123139  | -1.967974 | 1.508485  |
| H | 4.031355  | -2.729228 | 0.208426  |
| H | 2.978838  | 1.855180  | 3.153390  |
| H | 1.045843  | 0.904536  | -1.402413 |
| H | -0.275065 | -1.142997 | -1.506416 |
| H | 1.065051  | -1.144718 | 1.235644  |
| H | -1.293747 | 0.411111  | -3.216816 |
| H | -2.413547 | 1.861823  | -2.947031 |
| H | 2.044611  | 2.765507  | -0.269631 |
| H | 0.111262  | 1.088278  | 1.393382  |
| H | 1.667635  | 3.087524  | 1.422336  |
| H | 1.454093  | -1.938798 | -2.426670 |
| H | 2.853195  | -2.942462 | -2.037535 |
| H | 3.066893  | -1.224250 | -2.289675 |
| H | 5.782027  | -1.431553 | -0.645557 |
| H | -3.711345 | -2.823793 | 0.965108  |
| H | -2.828606 | -1.787661 | 2.090632  |

|   |           |           |           |
|---|-----------|-----------|-----------|
| H | -3.621374 | 0.222910  | 0.892400  |
| H | -5.419583 | 0.043136  | -0.814801 |
| H | -3.947102 | -0.737931 | -1.381881 |
| H | -5.287611 | -1.717050 | -0.778868 |
| H | -5.982640 | 0.107263  | 1.656080  |
| H | -4.901882 | -0.637874 | 2.836494  |
| H | -5.871479 | -1.650362 | 1.761780  |

CAM-B3LYP energy = -1154.93061277 a.u.

(2R,6R,7S,8R)-1, Conf. G

|   |           |           |           |
|---|-----------|-----------|-----------|
| C | 3.846330  | -1.363476 | 0.415189  |
| C | 3.316238  | 0.026356  | 0.630752  |
| C | 2.537514  | 0.453262  | 1.618041  |
| C | 2.197107  | -0.357142 | 2.834358  |
| C | 1.771180  | -1.581361 | -1.035740 |
| C | 2.752792  | -2.307841 | -0.154452 |
| C | 0.406280  | 1.593532  | 0.930136  |
| C | 0.309905  | 1.354088  | -0.598459 |
| C | -0.220848 | -0.029619 | -1.009041 |
| C | 0.659280  | -1.113319 | -0.476739 |
| O | -0.336025 | 2.816443  | 1.193458  |
| C | -0.895899 | 3.335425  | 0.092553  |
| C | -0.545635 | 2.494083  | -1.076413 |
| O | -1.562893 | 4.336421  | 0.127235  |
| C | -0.956556 | 2.784865  | -2.298096 |
| C | 1.819073  | 1.775056  | 1.492455  |
| C | 2.220656  | -1.276461 | -2.432110 |
| O | 4.927582  | -1.349297 | -0.521683 |
| O | -1.547856 | -0.144850 | -0.450836 |
| C | -2.441153 | -0.914409 | -1.090803 |
| O | -2.195311 | -1.485438 | -2.124973 |
| C | -3.752265 | -0.965230 | -0.359520 |
| C | -3.658158 | -1.632313 | 1.020752  |
| C | -5.012859 | -1.566977 | 1.717071  |
| C | -3.164430 | -3.071430 | 0.915120  |
| H | 4.199625  | -1.800742 | 1.352686  |
| H | 3.491947  | 0.691091  | -0.210868 |
| H | 2.762519  | -1.284609 | 2.893905  |
| H | 1.134770  | -0.614854 | 2.857627  |
| H | 2.221744  | -2.743520 | 0.691984  |
| H | 3.263051  | -3.116267 | -0.681018 |
| H | 2.396185  | 0.221976  | 3.738918  |
| H | 1.305528  | 1.435386  | -1.035564 |
| H | -0.301984 | -0.065079 | -2.092947 |
| H | 0.441688  | -1.392829 | 0.549116  |
| H | -0.696893 | 2.176819  | -3.154873 |
| H | -1.575763 | 3.656097  | -2.468708 |
| H | 2.370101  | 2.460226  | 0.845768  |
| H | -0.122313 | 0.815621  | 1.477584  |
| H | 1.720859  | 2.248352  | 2.471358  |
| H | 3.107273  | -0.638370 | -2.418082 |
| H | 1.454382  | -0.788288 | -3.031077 |
| H | 2.512780  | -2.198890 | -2.938518 |
| H | 5.614989  | -0.765127 | -0.183257 |
| H | -4.113635 | 0.058551  | -0.243223 |
| H | -4.457224 | -1.505813 | -0.991016 |

|   |           |           |          |
|---|-----------|-----------|----------|
| H | -2.939463 | -1.063041 | 1.615215 |
| H | -4.957231 | -2.009999 | 2.712495 |
| H | -5.355971 | -0.536702 | 1.824894 |
| H | -5.767921 | -2.115993 | 1.149066 |
| H | -3.096686 | -3.527630 | 1.903670 |
| H | -2.176711 | -3.132071 | 0.454606 |
| H | -3.850935 | -3.673066 | 0.314343 |

CAM-B3LYP energy = -1154.93052764 a.u.

(2R,6R,7S,8R)-1, Conf. H

|   |           |           |           |
|---|-----------|-----------|-----------|
| C | 3.863047  | -1.345046 | 0.412855  |
| C | 3.332690  | 0.039457  | 0.635221  |
| C | 2.540396  | 0.454395  | 1.615913  |
| C | 2.191965  | -0.366113 | 2.823329  |
| C | 1.766691  | -1.590136 | -1.008258 |
| C | 2.749076  | -2.300081 | -0.116277 |
| C | 0.409318  | 1.599220  | 0.932584  |
| C | 0.314053  | 1.353370  | -0.594940 |
| C | -0.219200 | -0.031119 | -0.999575 |
| C | 0.656179  | -1.111937 | -0.454782 |
| O | -0.327564 | 2.826948  | 1.189266  |
| C | -0.884501 | 3.342630  | 0.085407  |
| C | -0.537340 | 2.493750  | -1.079125 |
| O | -1.547197 | 4.346698  | 0.114463  |
| C | -0.947231 | 2.779548  | -2.302328 |
| C | 1.822152  | 1.776738  | 1.495580  |
| C | 2.212828  | -1.307080 | -2.410480 |
| O | 4.937583  | -1.216944 | -0.520389 |
| O | -1.549364 | -0.139975 | -0.447481 |
| C | -2.441384 | -0.909647 | -1.089034 |
| O | -2.192251 | -1.484281 | -2.120467 |
| C | -3.755298 | -0.956863 | -0.362681 |
| C | -3.668420 | -1.631299 | 1.014617  |
| C | -5.025225 | -1.564069 | 1.706622  |
| C | -3.179965 | -3.071819 | 0.903684  |
| H | 4.248256  | -1.776062 | 1.341032  |
| H | 3.524531  | 0.711181  | -0.196251 |
| H | 2.386563  | 0.205798  | 3.733497  |
| H | 2.758573  | -1.293220 | 2.878954  |
| H | 2.224523  | -2.702383 | 0.751210  |
| H | 3.233859  | -3.138717 | -0.622618 |
| H | 1.129812  | -0.624841 | 2.840038  |
| H | 1.310847  | 1.429587  | -1.030501 |
| H | -0.294565 | -0.073539 | -2.083614 |
| H | 0.438400  | -1.376800 | 0.574739  |
| H | -0.689901 | 2.165900  | -3.155796 |
| H | -1.563130 | 3.652204  | -2.477600 |
| H | 2.373524  | 2.463881  | 0.851273  |
| H | -0.123827 | 0.826477  | 1.482936  |
| H | 1.724359  | 2.246726  | 2.476197  |
| H | 3.083747  | -0.647644 | -2.410479 |
| H | 1.435898  | -0.851231 | -3.021168 |
| H | 2.526842  | -2.233775 | -2.895514 |
| H | 5.320509  | -2.087981 | -0.668572 |
| H | -4.112112 | 0.067984  | -0.242300 |
| H | -4.460827 | -1.491207 | -0.998831 |

|   |           |           |          |
|---|-----------|-----------|----------|
| H | -2.949522 | -1.067757 | 1.614311 |
| H | -4.974688 | -2.012093 | 2.700075 |
| H | -5.364756 | -0.533017 | 1.818230 |
| H | -5.780406 | -2.107450 | 1.133381 |
| H | -3.118334 | -3.533250 | 1.890203 |
| H | -2.190537 | -3.134081 | 0.447101 |
| H | -3.866283 | -3.667652 | 0.296936 |

CAM-B3LYP energy = -1154.93051689 a.u.

(2R,6R,7S,8R)-1, Conf. I

|   |           |           |           |
|---|-----------|-----------|-----------|
| C | -4.143994 | -1.411790 | -0.276207 |
| C | -3.653393 | 0.008926  | -0.235428 |
| C | -3.066002 | 0.687852  | -1.213606 |
| C | -2.975251 | 0.208173  | -2.632774 |
| C | -1.802401 | -1.904121 | 0.612387  |
| C | -2.954449 | -2.421518 | -0.206538 |
| C | -0.828948 | 1.710140  | -0.701580 |
| C | -0.431064 | 1.097506  | 0.665191  |
| C | 0.159269  | -0.320905 | 0.595882  |
| C | -0.818780 | -1.269081 | -0.017466 |
| O | -0.142947 | 2.989706  | -0.784476 |
| C | 0.630358  | 3.237904  | 0.281214  |
| C | 0.510725  | 2.116425  | 1.243266  |
| O | 1.286941  | 4.242027  | 0.373032  |
| C | 1.153930  | 2.110014  | 2.397397  |
| C | -2.324287 | 1.966649  | -0.909403 |
| C | -1.944869 | -1.960555 | 2.105613  |
| O | -5.111256 | -1.651843 | 0.746445  |
| O | 1.351904  | -0.234158 | -0.212782 |
| C | 2.323689  | -1.135355 | 0.001818  |
| O | 2.260139  | -1.975776 | 0.863761  |
| C | 3.450678  | -0.972257 | -0.980032 |
| C | 4.790490  | -1.519232 | -0.494048 |
| C | 5.784140  | -1.570683 | -1.649933 |
| C | 5.342278  | -0.691540 | 0.662911  |
| H | -4.684006 | -1.614390 | -1.199833 |
| H | -3.667964 | 0.455205  | 0.756349  |
| H | -1.939440 | 0.021053  | -2.927788 |
| H | -3.357571 | 0.974506  | -3.310876 |
| H | -2.614969 | -2.598123 | -1.227721 |
| H | -3.348938 | -3.363211 | 0.179477  |
| H | -3.537571 | -0.706866 | -2.805508 |
| H | -1.318752 | 1.022691  | 1.294110  |
| H | 0.447260  | -0.626465 | 1.599504  |
| H | -0.808241 | -1.276967 | -1.102564 |
| H | 1.061257  | 1.297175  | 3.105966  |
| H | 1.801189  | 2.936204  | 2.661968  |
| H | -2.725687 | 2.450249  | -0.017041 |
| H | -0.428532 | 1.117994  | -1.521975 |
| H | -2.421193 | 2.668611  | -1.739960 |
| H | -2.335461 | -2.930991 | 2.414784  |
| H | -2.645961 | -1.202863 | 2.471640  |
| H | -1.001728 | -1.794686 | 2.623407  |
| H | -4.724933 | -1.454414 | 1.606364  |
| H | 3.135243  | -1.499240 | -1.885999 |
| H | 3.531558  | 0.081784  | -1.251246 |

|   |          |           |           |
|---|----------|-----------|-----------|
| H | 4.622279 | -2.538334 | -0.138151 |
| H | 6.741755 | -1.975557 | -1.319418 |
| H | 5.416318 | -2.197778 | -2.463951 |
| H | 5.966602 | -0.570932 | -2.052108 |
| H | 6.286648 | -1.105812 | 1.019245  |
| H | 4.651637 | -0.665351 | 1.506637  |
| H | 5.528242 | 0.337563  | 0.344864  |

CAM-B3LYP energy = -1154.92901160 a.u.

(2R,6R,7S,8R)-1, Conf. J

|   |           |           |           |
|---|-----------|-----------|-----------|
| C | -3.852891 | -1.773566 | -0.315774 |
| C | -3.527267 | -0.309487 | -0.422343 |
| C | -2.913726 | 0.310869  | -1.423070 |
| C | -2.614584 | -0.323791 | -2.749633 |
| C | -1.576308 | -1.864849 | 0.837313  |
| C | -2.575500 | -2.615797 | -0.001225 |
| C | -0.874502 | 1.661673  | -0.847694 |
| C | -0.559388 | 1.262246  | 0.616224  |
| C | 0.192181  | -0.069632 | 0.778507  |
| C | -0.609667 | -1.197113 | 0.215303  |
| O | -0.335505 | 3.000646  | -1.024591 |
| C | 0.285992  | 3.462519  | 0.068979  |
| C | 0.194506  | 2.449325  | 1.147146  |
| O | 0.809435  | 4.545586  | 0.095704  |
| C | 0.709471  | 2.651140  | 2.347111  |
| C | -2.357910 | 1.700417  | -1.225909 |
| C | -1.861966 | -1.753434 | 2.306670  |
| O | -4.893272 | -2.000985 | 0.635641  |
| O | 1.437500  | 0.069568  | 0.062264  |
| C | 2.489164  | -0.654386 | 0.477147  |
| O | 2.434260  | -1.416392 | 1.409627  |
| C | 3.717061  | -0.349710 | -0.335890 |
| C | 4.779707  | -1.445209 | -0.309075 |
| C | 4.301000  | -2.703919 | -1.026428 |
| C | 6.076886  | -0.928436 | -0.922724 |
| H | -4.265361 | -2.152768 | -1.249520 |
| H | -3.698185 | 0.250991  | 0.493971  |
| H | -1.538157 | -0.406377 | -2.921360 |
| H | -3.010690 | 0.295712  | -3.557517 |
| H | -2.115148 | -2.879154 | -0.954179 |
| H | -2.905213 | -3.540874 | 0.474925  |
| H | -3.041273 | -1.319669 | -2.847347 |
| H | -1.495258 | 1.148462  | 1.164152  |
| H | 0.416483  | -0.215965 | 1.833139  |
| H | -0.490915 | -1.335475 | -0.854162 |
| H | 0.635194  | 1.915881  | 3.137902  |
| H | 1.227139  | 3.575961  | 2.566978  |
| H | -2.906144 | 2.234294  | -0.447590 |
| H | -0.321528 | 1.036792  | -1.546383 |
| H | -2.443462 | 2.278013  | -2.148389 |
| H | -2.668555 | -1.040131 | 2.506542  |
| H | -0.996854 | -1.420929 | 2.877865  |
| H | -2.182402 | -2.716120 | 2.707173  |
| H | -4.636745 | -1.632843 | 1.487962  |
| H | 3.412432  | -0.123955 | -1.359436 |
| H | 4.123855  | 0.580088  | 0.073637  |

|   |          |           |           |
|---|----------|-----------|-----------|
| H | 4.969795 | -1.697030 | 0.736899  |
| H | 5.059195 | -3.487169 | -0.980508 |
| H | 3.387333 | -3.099620 | -0.581640 |
| H | 4.102200 | -2.493832 | -2.080602 |
| H | 6.851333 | -1.696242 | -0.893606 |
| H | 6.449982 | -0.053166 | -0.388064 |
| H | 5.928049 | -0.645431 | -1.967816 |

CAM-B3LYP energy = -1154.92887689 a.u.

|   |           |           |           |
|---|-----------|-----------|-----------|
| H | -3.596139 | -2.052897 | -1.260876 |
| H | -4.821597 | -2.102202 | 0.933272  |
| H | -6.296120 | -0.197813 | 1.531583  |
| H | -4.606981 | 0.303022  | 1.550208  |
| H | -5.644570 | 0.742649  | 0.188312  |
| H | -7.089392 | -1.983632 | -0.089438 |
| H | -5.944703 | -2.776085 | -1.174928 |
| H | -6.427883 | -1.102561 | -1.466736 |

CAM-B3LYP energy = -1154.92812578 a.u.

(2R,6R,7S,8S)-1, Conf. A

|   |           |           |           |
|---|-----------|-----------|-----------|
| C | 3.710189  | -2.141560 | -0.293006 |
| C | 3.505241  | -0.747972 | -0.791810 |
| C | 3.603865  | 0.374535  | -0.086526 |
| C | 4.269353  | 0.504738  | 1.253977  |
| C | 1.297653  | -1.961321 | 0.444206  |
| C | 2.334871  | -2.845217 | -0.204229 |
| C | 1.534701  | 1.748919  | 0.150347  |
| C | 0.266286  | 1.258513  | -0.607111 |
| C | -0.314826 | -0.031542 | 0.013562  |
| C | 0.545385  | -1.198540 | -0.342489 |
| O | 1.310830  | 3.154163  | 0.447065  |
| C | 0.083021  | 3.567566  | 0.112135  |
| C | -0.639459 | 2.462328  | -0.561761 |
| O | -0.296404 | 4.686926  | 0.339568  |
| C | -1.846697 | 2.655072  | -1.067103 |
| C | 2.894959  | 1.621254  | -0.556904 |
| C | 1.306757  | -1.916424 | 1.941291  |
| O | 4.499559  | -2.944133 | -1.175422 |
| O | -1.623632 | -0.222581 | -0.575119 |
| C | -2.527436 | -0.920865 | 0.128554  |
| O | -2.324011 | -1.324970 | 1.246477  |
| C | -3.783306 | -1.153354 | -0.665948 |
| C | -5.038633 | -1.338056 | 0.183397  |
| C | -5.414382 | -0.048429 | 0.906644  |
| C | -6.189793 | -1.830853 | -0.687399 |
| H | 4.172003  | -2.136849 | 0.695398  |
| H | 3.032377  | -0.696536 | -1.769018 |
| H | 4.733359  | -0.416757 | 1.595599  |
| H | 3.570253  | 0.836438  | 2.025240  |
| H | 2.460928  | -3.785323 | 0.335530  |
| H | 2.036426  | -3.082027 | -1.226625 |
| H | 5.047900  | 1.269356  | 1.194677  |
| H | 0.520928  | 1.040891  | -1.645568 |
| H | -0.441016 | 0.093134  | 1.086219  |
| H | 0.631712  | -1.337716 | -1.416412 |
| H | -2.378276 | 1.883176  | -1.601661 |
| H | -2.324111 | 3.619720  | -0.948564 |
| H | 2.756821  | 1.617808  | -1.638462 |
| H | 1.586121  | 1.261675  | 1.123379  |
| H | 3.473428  | 2.509411  | -0.297543 |
| H | 1.182981  | -2.925721 | 2.340008  |
| H | 0.515939  | -1.293086 | 2.351622  |
| H | 2.265006  | -1.548501 | 2.316292  |
| H | 5.377212  | -2.551494 | -1.233132 |
| H | -3.909844 | -0.336062 | -1.377887 |

(2R,6R,7S,8S)-1, Conf. B

|   |           |           |           |
|---|-----------|-----------|-----------|
| C | 3.179337  | -2.612625 | -0.356304 |
| C | 3.213401  | -1.211153 | -0.874226 |
| C | 3.572781  | -0.120783 | -0.203952 |
| C | 4.338363  | -0.105038 | 1.088443  |
| C | 0.895293  | -1.957816 | 0.510600  |
| C | 1.703027  | -3.036314 | -0.169278 |
| C | 1.815476  | 1.619078  | 0.123506  |
| C | 0.436361  | 1.380900  | -0.556916 |
| C | -0.348811 | 0.233658  | 0.117622  |
| C | 0.251109  | -1.081866 | -0.253828 |
| O | 1.880964  | 3.040817  | 0.418954  |
| C | 0.740309  | 3.683333  | 0.141927  |
| C | -0.215712 | 2.737553  | -0.482028 |
| O | 0.596144  | 4.855089  | 0.376132  |
| C | -1.388278 | 3.158005  | -0.927498 |
| C | 3.083921  | 1.233618  | -0.657489 |
| C | 1.009906  | -1.884296 | 2.002249  |
| O | 3.743191  | -3.562223 | -1.265248 |
| O | -1.697872 | 0.293175  | -0.403523 |
| C | -2.688364 | -0.179829 | 0.367527  |
| O | -2.506557 | -0.636191 | 1.468859  |
| C | -4.027101 | -0.018653 | -0.299994 |
| C | -5.089574 | -1.006111 | 0.176865  |
| C | -6.460752 | -0.590404 | -0.345729 |
| C | -4.753369 | -2.432295 | -0.248263 |
| H | 3.695547  | -2.685770 | 0.602133  |
| H | 2.694569  | -1.079404 | -1.819995 |
| H | 5.243230  | 0.494385  | 0.961256  |
| H | 4.638886  | -1.094372 | 1.423397  |
| H | 1.678975  | -3.973467 | 0.389483  |
| H | 1.302978  | -3.228875 | -1.165850 |
| H | 3.768668  | 0.364942  | 1.893619  |
| H | 0.584495  | 1.110803  | -1.603631 |
| H | -0.391295 | 0.392572  | 1.192279  |
| H | 0.240317  | -1.255398 | -1.326204 |
| H | -2.085956 | 2.501071  | -1.423517 |
| H | -1.664232 | 4.196968  | -0.797311 |
| H | 2.884214  | 1.247734  | -1.729192 |
| H | 1.828531  | 1.129820  | 1.096660  |
| H | 3.832641  | 1.999132  | -0.447753 |
| H | 0.376466  | -1.116393 | 2.439873  |
| H | 2.042027  | -1.692696 | 2.306103  |
| H | 0.729395  | -2.844472 | 2.440719  |
| H | 4.673995  | -3.345679 | -1.385448 |
| H | -4.345845 | 1.006761  | -0.087922 |

|   |           |           |           |
|---|-----------|-----------|-----------|
| H | -3.892111 | -0.081323 | -1.381109 |
| H | -5.110465 | -0.968419 | 1.268437  |
| H | -7.232264 | -1.279103 | 0.001584  |
| H | -6.728368 | 0.412762  | -0.009189 |
| H | -6.478904 | -0.594169 | -1.438524 |
| H | -5.504784 | -3.132981 | 0.118972  |
| H | -3.784700 | -2.751137 | 0.138407  |
| H | -4.726902 | -2.512401 | -1.338074 |

CAM-B3LYP energy = -1154.92801902 a.u.

(2R,6R,7S,8S)-1, Conf. C

|   |           |           |           |
|---|-----------|-----------|-----------|
| C | 3.086698  | -2.538496 | -0.392632 |
| C | 3.007780  | -1.177299 | -1.004427 |
| C | 3.409258  | -0.033726 | -0.458219 |
| C | 4.329591  | 0.089732  | 0.722804  |
| C | 0.919948  | -1.878041 | 0.737370  |
| C | 1.663645  | -2.981045 | 0.024614  |
| C | 1.660692  | 1.690053  | -0.018804 |
| C | 0.210579  | 1.366410  | -0.481191 |
| C | -0.432161 | 0.254409  | 0.377605  |
| C | 0.153078  | -1.069621 | 0.012742  |
| O | 1.717216  | 3.131723  | 0.157445  |
| C | 0.526696  | 3.722329  | -0.000413 |
| C | -0.471945 | 2.708176  | -0.415168 |
| O | 0.374566  | 4.904356  | 0.167695  |
| C | -1.707810 | 3.063555  | -0.725457 |
| C | 2.823705  | 1.273266  | -0.935422 |
| C | 1.225224  | -1.705036 | 2.193517  |
| O | 3.550627  | -3.538189 | -1.304429 |
| O | -1.843825 | 0.245739  | 0.058496  |
| C | -2.691968 | -0.212316 | 0.990589  |
| O | -2.335929 | -0.569037 | 2.087247  |
| C | -4.111972 | -0.212482 | 0.498475  |
| C | -4.345105 | -1.108871 | -0.725671 |
| C | -3.989044 | -2.561662 | -0.428082 |
| C | -5.791699 | -0.981466 | -1.189857 |
| H | 3.730411  | -2.532388 | 0.488244  |
| H | 2.371219  | -1.126872 | -1.883841 |
| H | 4.705502  | -0.866653 | 1.076452  |
| H | 3.848857  | 0.594193  | 1.564170  |
| H | 1.747234  | -3.877026 | 0.642077  |
| H | 1.137745  | -3.252681 | -0.891885 |
| H | 5.189022  | 0.704980  | 0.444975  |
| H | 0.223071  | 1.021300  | -1.516191 |
| H | -0.325760 | 0.488870  | 1.433953  |
| H | 0.006751  | -1.313722 | -1.035657 |
| H | -2.441926 | 2.352734  | -1.072320 |
| H | -2.000740 | 4.102082  | -0.635475 |
| H | 2.482145  | 1.203836  | -1.968546 |
| H | 1.822998  | 1.279905  | 0.977184  |
| H | 3.570433  | 2.067234  | -0.883821 |
| H | 0.639541  | -0.916182 | 2.659199  |
| H | 2.284320  | -1.484939 | 2.348567  |
| H | 1.020275  | -2.637095 | 2.724827  |
| H | 4.449532  | -3.311477 | -1.565803 |
| H | -4.741871 | -0.535089 | 1.327464  |

|   |           |           |           |
|---|-----------|-----------|-----------|
| H | -4.381057 | 0.817123  | 0.251894  |
| H | -3.694855 | -0.751575 | -1.527621 |
| H | -4.153657 | -3.186124 | -1.307265 |
| H | -2.943511 | -2.673481 | -0.134688 |
| H | -4.608284 | -2.953577 | 0.382614  |
| H | -5.968177 | -1.592569 | -2.076165 |
| H | -6.040813 | 0.051755  | -1.437485 |
| H | -6.480767 | -1.316521 | -0.410729 |

CAM-B3LYP energy = -1154.92758824 a.u.

(2R,6R,7S,8S)-1, Conf. D

|   |           |           |           |
|---|-----------|-----------|-----------|
| C | 3.717823  | -2.140933 | -0.295269 |
| C | 3.513858  | -0.750915 | -0.794318 |
| C | 3.603554  | 0.370438  | -0.087306 |
| C | 4.263311  | 0.502174  | 1.255819  |
| C | 1.294623  | -1.955404 | 0.442208  |
| C | 2.329973  | -2.838546 | -0.209379 |
| C | 1.536894  | 1.752846  | 0.146779  |
| C | 0.265041  | 1.266377  | -0.607087 |
| C | -0.315890 | -0.023324 | 0.013599  |
| C | 0.543496  | -1.190380 | -0.343624 |
| O | 1.320225  | 3.160335  | 0.438829  |
| C | 0.091863  | 3.576732  | 0.109850  |
| C | -0.638006 | 2.472052  | -0.557119 |
| O | -0.282809 | 4.697877  | 0.336463  |
| C | -1.848608 | 2.666811  | -1.053581 |
| C | 2.895488  | 1.616257  | -0.561622 |
| C | 1.304652  | -1.912606 | 1.939342  |
| O | 4.565547  | -2.848500 | -1.201643 |
| O | -1.625255 | -0.213763 | -0.574289 |
| C | -2.527313 | -0.915752 | 0.127963  |
| O | -2.322455 | -1.322466 | 1.244669  |
| C | -3.782913 | -1.148658 | -0.666858 |
| C | -5.036457 | -1.346506 | 0.182073  |
| C | -5.419010 | -0.064111 | 0.914536  |
| C | -6.185410 | -1.839829 | -0.691366 |
| H | 4.176058  | -2.134931 | 0.694548  |
| H | 3.046627  | -0.700481 | -1.774024 |
| H | 4.727645  | -0.418738 | 1.598592  |
| H | 3.561552  | 0.833401  | 2.024836  |
| H | 2.445129  | -3.782603 | 0.328865  |
| H | 2.031303  | -3.069247 | -1.233051 |
| H | 5.041453  | 1.267382  | 1.198745  |
| H | 0.515974  | 1.049916  | -1.646752 |
| H | -0.441208 | 0.101058  | 1.086424  |
| H | 0.629876  | -1.328297 | -1.417702 |
| H | -2.386055 | 1.895411  | -1.582919 |
| H | -2.322752 | 3.632799  | -0.932891 |
| H | 2.755686  | 1.608046  | -1.642939 |
| H | 1.586802  | 1.268789  | 1.121480  |
| H | 3.477165  | 2.503945  | -0.307827 |
| H | 0.515278  | -1.288092 | 2.350657  |
| H | 2.263725  | -1.546947 | 2.314330  |
| H | 1.178883  | -2.922029 | 2.337184  |
| H | 4.647317  | -3.759602 | -0.898320 |
| H | -3.914384 | -0.326497 | -1.372310 |

|   |           |           |           |
|---|-----------|-----------|-----------|
| H | -3.591534 | -2.042377 | -1.269198 |
| H | -4.814525 | -2.114616 | 0.926446  |
| H | -6.299643 | -0.222691 | 1.538767  |
| H | -4.613218 | 0.287192  | 1.560174  |
| H | -5.653818 | 0.730686  | 0.201822  |
| H | -7.083830 | -2.001495 | -0.093974 |
| H | -5.935407 | -2.780450 | -1.185288 |
| H | -6.427928 | -1.107729 | -1.465753 |

CAM-B3LYP energy = -1154.92725217 a.u.

(2R,6R,7S,8S)-1, Conf. E

|   |           |           |           |
|---|-----------|-----------|-----------|
| C | 3.717456  | -2.144312 | -0.289251 |
| C | 3.510259  | -0.750439 | -0.789355 |
| C | 3.606651  | 0.373375  | -0.086946 |
| C | 4.271280  | 0.504685  | 1.253651  |
| C | 1.296310  | -1.959222 | 0.447034  |
| C | 2.333031  | -2.845492 | -0.198956 |
| C | 1.537319  | 1.748639  | 0.148734  |
| C | 0.268039  | 1.259431  | -0.607992 |
| C | -0.315090 | -0.028912 | 0.014366  |
| C | 0.542760  | -1.198095 | -0.340205 |
| O | 1.315172  | 3.154201  | 0.445132  |
| C | 0.088034  | 3.569208  | 0.109690  |
| C | -0.635847 | 2.464678  | -0.563875 |
| O | -0.289886 | 4.689193  | 0.336470  |
| C | -1.842618 | 2.658882  | -1.069751 |
| C | 2.897029  | 1.619051  | -0.559174 |
| C | 1.310200  | -1.908841 | 1.943969  |
| O | 4.606268  | -2.919261 | -1.093814 |
| O | -1.624196 | -0.218489 | -0.573921 |
| C | -2.528456 | -0.916181 | 0.129933  |
| O | -2.325004 | -1.320488 | 1.247732  |
| C | -3.784416 | -1.147597 | -0.664720 |
| C | -5.038868 | -1.339542 | 0.184226  |
| C | -5.417870 | -0.054219 | 0.913398  |
| C | -6.188960 | -1.831496 | -0.688486 |
| H | 4.178341  | -2.138258 | 0.695168  |
| H | 3.033133  | -0.695828 | -1.765559 |
| H | 5.055176  | 1.263593  | 1.191735  |
| H | 4.730139  | -0.418080 | 1.598916  |
| H | 2.458360  | -3.785162 | 0.341527  |
| H | 2.024075  | -3.086117 | -1.218907 |
| H | 3.573881  | 0.844253  | 2.023000  |
| H | 0.522135  | 1.040182  | -1.646244 |
| H | -0.440843 | 0.097341  | 1.086902  |
| H | 0.625816  | -1.340649 | -1.414034 |
| H | -2.375199 | 1.887422  | -1.603951 |
| H | -2.318638 | 3.624311  | -0.951990 |
| H | 2.758211  | 1.613777  | -1.640664 |
| H | 1.588725  | 1.261718  | 1.121910  |
| H | 3.475990  | 2.507555  | -0.302232 |
| H | 0.520773  | -1.283718 | 2.354201  |
| H | 2.269331  | -1.539264 | 2.315004  |
| H | 1.187494  | -2.916486 | 2.347099  |
| H | 4.264345  | -2.946085 | -1.995041 |
| H | -3.913222 | -0.326896 | -1.372356 |

|   |           |           |           |
|---|-----------|-----------|-----------|
| H | -3.595465 | -2.043484 | -1.264596 |
| H | -4.819561 | -2.106495 | 0.930566  |
| H | -6.299156 | -0.208718 | 1.537728  |
| H | -4.611279 | 0.296328  | 1.558443  |
| H | -5.650166 | 0.739506  | 0.198670  |
| H | -7.088050 | -1.989164 | -0.091038 |
| H | -5.941564 | -2.773974 | -1.180174 |
| H | -6.429067 | -1.100438 | -1.464611 |

CAM-B3LYP energy = -1154.92723616 a.u.

(2R,6R,7S,8S)-1, Conf. F

|   |           |           |           |
|---|-----------|-----------|-----------|
| C | 3.185142  | -2.616443 | -0.355451 |
| C | 3.213824  | -1.214427 | -0.875225 |
| C | 3.575642  | -0.122057 | -0.210672 |
| C | 4.347700  | -0.103672 | 1.077501  |
| C | 0.897624  | -1.953584 | 0.520542  |
| C | 1.701850  | -3.036417 | -0.156749 |
| C | 1.817036  | 1.616103  | 0.120514  |
| C | 0.436463  | 1.378676  | -0.557104 |
| C | -0.350005 | 0.235136  | 0.122283  |
| C | 0.246922  | -1.083001 | -0.244678 |
| O | 1.883234  | 3.037466  | 0.417463  |
| C | 0.743537  | 3.681315  | 0.139555  |
| C | -0.213188 | 2.736550  | -0.484860 |
| O | 0.600543  | 4.853253  | 0.373505  |
| C | -1.384538 | 3.158269  | -0.932307 |
| C | 3.083237  | 1.231094  | -0.664350 |
| C | 1.026339  | -1.868709 | 2.010482  |
| O | 3.852505  | -3.557474 | -1.196376 |
| O | -1.698898 | 0.295147  | -0.398735 |
| C | -2.689924 | -0.176468 | 0.372498  |
| O | -2.508625 | -0.632042 | 1.474219  |
| C | -4.028355 | -0.014954 | -0.295547 |
| C | -5.089974 | -1.005154 | 0.177537  |
| C | -6.460963 | -0.590351 | -0.346308 |
| C | -4.750925 | -2.429834 | -0.250356 |
| H | 3.705971  | -2.687350 | 0.596085  |
| H | 2.685644  | -1.078411 | -1.816499 |
| H | 5.259310  | 0.483110  | 0.939823  |
| H | 4.639110  | -1.093207 | 1.419999  |
| H | 1.681072  | -3.970775 | 0.406634  |
| H | 1.284909  | -3.235012 | -1.146694 |
| H | 3.787964  | 0.381233  | 1.880785  |
| H | 0.582176  | 1.105044  | -1.603228 |
| H | -0.391587 | 0.398082  | 1.196407  |
| H | 0.227252  | -1.263738 | -1.315823 |
| H | -2.082616 | 2.501732  | -1.428330 |
| H | -1.659152 | 4.197771  | -0.803635 |
| H | 2.879948  | 1.243796  | -1.735413 |
| H | 1.832561  | 1.125677  | 1.093052  |
| H | 3.831940  | 1.997634  | -0.458562 |
| H | 0.751630  | -2.825732 | 2.459291  |
| H | 0.396122  | -1.098164 | 2.448137  |
| H | 2.060842  | -1.672679 | 2.303127  |
| H | 3.452695  | -3.528242 | -2.073394 |
| H | -4.348532 | 1.009419  | -0.080635 |

|   |           |           |           |
|---|-----------|-----------|-----------|
| H | -3.892539 | -0.074360 | -1.376734 |
| H | -5.112617 | -0.969988 | 1.269158  |
| H | -7.231995 | -1.280974 | -0.001770 |
| H | -6.730622 | 0.411668  | -0.008003 |
| H | -6.477343 | -0.591724 | -1.439141 |
| H | -5.502033 | -3.132458 | 0.113780  |
| H | -3.782554 | -2.748258 | 0.137436  |
| H | -4.722300 | -2.507319 | -1.340308 |

CAM-B3LYP energy = -1154.92713667 a.u.

(2R,6R,7S,8S)-1, Conf. G

|   |           |           |           |
|---|-----------|-----------|-----------|
| C | 3.193360  | -2.609289 | -0.361197 |
| C | 3.226895  | -1.210200 | -0.875679 |
| C | 3.570009  | -0.120239 | -0.197636 |
| C | 4.321774  | -0.104048 | 1.102861  |
| C | 0.895871  | -1.956016 | 0.501853  |
| C | 1.706293  | -3.028977 | -0.182820 |
| C | 1.814572  | 1.626340  | 0.122544  |
| C | 0.435021  | 1.388186  | -0.556606 |
| C | -0.347014 | 0.237587  | 0.115238  |
| C | 0.255202  | -1.075512 | -0.260598 |
| O | 1.883927  | 3.049867  | 0.409061  |
| C | 0.741543  | 3.691542  | 0.137592  |
| C | -0.218530 | 2.744020  | -0.477615 |
| O | 0.598856  | 4.864027  | 0.369138  |
| C | -1.394758 | 3.163293  | -0.914502 |
| C | 3.082400  | 1.233334  | -0.655041 |
| C | 1.005197  | -1.890942 | 1.994274  |
| O | 3.836425  | -3.473404 | -1.299594 |
| O | -1.696928 | 0.295600  | -0.404250 |
| C | -2.685431 | -0.181642 | 0.366703  |
| O | -2.501370 | -0.640032 | 1.466836  |
| C | -4.025225 | -0.022265 | -0.299151 |
| C | -5.086062 | -1.010649 | 0.179355  |
| C | -6.458329 | -0.596461 | -0.341631 |
| C | -4.749086 | -2.436670 | -0.245693 |
| H | 3.702926  | -2.681865 | 0.600589  |
| H | 2.719715  | -1.079642 | -1.827688 |
| H | 3.741604  | 0.358806  | 1.904644  |
| H | 5.224200  | 0.501268  | 0.986801  |
| H | 1.672145  | -3.970257 | 0.371307  |
| H | 1.310329  | -3.212789 | -1.182610 |
| H | 4.625681  | -1.092927 | 1.436106  |
| H | 0.582558  | 1.121723  | -1.604397 |
| H | -0.388698 | 0.393286  | 1.190407  |
| H | 0.248925  | -1.243494 | -1.333883 |
| H | -2.095786 | 2.505630  | -1.404719 |
| H | -1.670162 | 4.202258  | -0.783170 |
| H | 2.884120  | 1.244375  | -1.727059 |
| H | 1.825434  | 1.143306  | 1.098806  |
| H | 3.832847  | 1.997771  | -0.447316 |
| H | 2.036056  | -1.700373 | 2.302885  |
| H | 0.723431  | -2.853500 | 2.426746  |
| H | 0.369648  | -1.125730 | 2.433510  |
| H | 3.763635  | -4.380389 | -0.981931 |
| H | -4.344864 | 1.002887  | -0.087151 |

|   |           |           |           |
|---|-----------|-----------|-----------|
| H | -3.891458 | -0.085187 | -1.380415 |
| H | -5.105647 | -0.972620 | 1.270940  |
| H | -7.228730 | -1.285758 | 0.006965  |
| H | -6.726471 | 0.406579  | -0.005138 |
| H | -6.477911 | -0.600670 | -1.434399 |
| H | -5.499439 | -3.137879 | 0.122727  |
| H | -3.779663 | -2.754478 | 0.139923  |
| H | -4.723912 | -2.517149 | -1.335507 |

CAM-B3LYP energy = -1154.92713017 a.u.

(2R,6R,7S,8S)-1, Conf. H

|   |           |           |           |
|---|-----------|-----------|-----------|
| C | 3.099853  | -2.532932 | -0.399629 |
| C | 3.015896  | -1.175920 | -1.011593 |
| C | 3.407034  | -0.030751 | -0.462871 |
| C | 4.324282  | 0.097933  | 0.719953  |
| C | 0.924394  | -1.871706 | 0.737495  |
| C | 1.667910  | -2.972150 | 0.021296  |
| C | 1.657453  | 1.694678  | -0.023679 |
| C | 0.205471  | 1.371676  | -0.479957 |
| C | -0.432573 | 0.258278  | 0.379879  |
| C | 0.155231  | -1.064194 | 0.014022  |
| O | 1.716425  | 3.137018  | 0.147233  |
| C | 0.525098  | 3.727782  | -0.003246 |
| C | -0.476989 | 2.713239  | -0.408931 |
| O | 0.374562  | 4.910215  | 0.163559  |
| C | -1.715548 | 3.068444  | -0.708522 |
| C | 2.816806  | 1.273282  | -0.942536 |
| C | 1.232480  | -1.698600 | 2.193021  |
| O | 3.629822  | -3.450612 | -1.357709 |
| O | -1.844764 | 0.246090  | 0.062745  |
| C | -2.689960 | -0.219200 | 0.993880  |
| O | -2.331154 | -0.579196 | 2.088576  |
| C | -4.110573 | -0.222738 | 0.503434  |
| C | -4.341232 | -1.112394 | -0.726075 |
| C | -3.979687 | -2.565663 | -0.437623 |
| C | -5.788537 | -0.987441 | -1.188732 |
| H | 3.743443  | -2.522783 | 0.481012  |
| H | 2.382474  | -1.129572 | -1.893211 |
| H | 5.181116  | 0.717250  | 0.443163  |
| H | 4.704851  | -0.856675 | 1.073442  |
| H | 1.745904  | -3.869184 | 0.640684  |
| H | 1.140616  | -3.241267 | -0.895115 |
| H | 3.840137  | 0.599958  | 1.560790  |
| H | 0.213572  | 1.028197  | -1.515580 |
| H | -0.325105 | 0.493087  | 1.436084  |
| H | 0.007947  | -1.308406 | -1.034214 |
| H | -2.452653 | 2.357492  | -1.048653 |
| H | -2.007555 | 4.107041  | -0.616421 |
| H | 2.471307  | 1.198898  | -1.974006 |
| H | 1.822105  | 1.287913  | 0.973309  |
| H | 3.563229  | 2.067970  | -0.897853 |
| H | 2.291651  | -1.477575 | 2.345986  |
| H | 1.029098  | -2.630548 | 2.725171  |
| H | 0.647189  | -0.909983 | 2.659583  |
| H | 3.629937  | -4.333175 | -0.970569 |
| H | -4.738047 | -0.553202 | 1.331175  |



|   |           |           |           |
|---|-----------|-----------|-----------|
| H | -4.384550 | 0.807198  | 0.263677  |
| H | -3.692765 | -0.747794 | -1.526163 |
| H | -4.142077 | -3.185236 | -1.320679 |
| H | -2.933689 | -2.675346 | -0.145061 |
| H | -4.597346 | -2.964978 | 0.370669  |
| H | -5.963248 | -1.593766 | -2.078667 |
| H | -6.041506 | 0.046352  | -1.429967 |
| H | -6.475996 | -1.329725 | -0.411332 |

CAM-B3LYP energy = -1154.92673130 a.u.

(2R,6R,7S,8S)-1, Conf. I

|   |           |           |           |
|---|-----------|-----------|-----------|
| C | 3.102489  | -2.534941 | -0.395428 |
| C | 3.017922  | -1.170618 | -1.002144 |
| C | 3.414458  | -0.026842 | -0.454215 |
| C | 4.331986  | 0.095908  | 0.728754  |
| C | 0.924731  | -1.879483 | 0.733585  |
| C | 1.672438  | -2.980249 | 0.021485  |
| C | 1.659579  | 1.691557  | -0.016286 |
| C | 0.211753  | 1.363565  | -0.482997 |
| C | -0.430762 | 0.251020  | 0.375583  |
| C | 0.154663  | -1.072802 | 0.010198  |
| O | 1.710950  | 3.133205  | 0.161513  |
| C | 0.519659  | 3.720622  | -0.002168 |
| C | -0.474321 | 2.703713  | -0.421307 |
| O | 0.363559  | 4.902271  | 0.164875  |
| C | -1.709438 | 3.055770  | -0.738257 |
| C | 2.826250  | 1.279512  | -0.930145 |
| C | 1.233946  | -1.704245 | 2.188711  |
| O | 3.687221  | -3.512430 | -1.255995 |
| O | -1.842548 | 0.241990  | 0.057600  |
| C | -2.690251 | -0.212616 | 0.991857  |
| O | -2.333281 | -0.567984 | 2.088634  |
| C | -4.110946 | -0.210788 | 0.501808  |
| C | -4.348182 | -1.110653 | -0.718991 |
| C | -3.995300 | -2.563327 | -0.417070 |
| C | -5.795201 | -0.981174 | -1.181283 |
| H | 3.743669  | -2.529296 | 0.482357  |
| H | 2.379029  | -1.113476 | -1.880898 |
| H | 4.702875  | -0.861088 | 1.086171  |
| H | 3.851943  | 0.606220  | 1.566969  |
| H | 1.758351  | -3.876670 | 0.637824  |
| H | 1.138290  | -3.253850 | -0.891460 |
| H | 5.195656  | 0.705104  | 0.450748  |
| H | 0.228298  | 1.017038  | -1.517478 |
| H | -0.323738 | 0.485062  | 1.431936  |
| H | 0.006046  | -1.317652 | -1.037801 |
| H | -2.440083 | 2.342870  | -1.088208 |
| H | -2.005411 | 4.093638  | -0.650642 |
| H | 2.488142  | 1.211747  | -1.964554 |
| H | 1.820704  | 1.280998  | 0.979716  |
| H | 3.570853  | 2.075185  | -0.874919 |
| H | 1.034840  | -2.636674 | 2.721528  |
| H | 0.646168  | -0.917596 | 2.655434  |
| H | 2.292343  | -1.478826 | 2.340755  |
| H | 3.175786  | -3.551784 | -2.072515 |
| H | -4.740464 | -0.529099 | 1.332733  |

|   |           |           |           |
|---|-----------|-----------|-----------|
| H | -4.377716 | 0.818675  | 0.252194  |
| H | -3.698323 | -0.757636 | -1.523168 |
| H | -4.162898 | -3.190370 | -1.293852 |
| H | -2.949604 | -2.676774 | -0.124869 |
| H | -4.614222 | -2.950915 | 0.395934  |
| H | -5.974721 | -1.594928 | -2.065144 |
| H | -6.042070 | 0.051809  | -1.432112 |
| H | -6.483823 | -1.311708 | -0.399838 |

CAM-B3LYP energy = -1154.92672677 a.u.

(2R,6R,7S,8S)-1, Conf. J

|   |           |           |           |
|---|-----------|-----------|-----------|
| C | 3.982461  | -1.659065 | -0.382189 |
| C | 3.531464  | -0.313944 | -0.853723 |
| C | 3.485125  | 0.807372  | -0.140982 |
| C | 4.181307  | 1.034922  | 1.170590  |
| C | 1.603148  | -1.878413 | 0.447156  |
| C | 2.747506  | -2.580711 | -0.241685 |
| C | 1.223293  | 1.792968  | 0.180067  |
| C | 0.048439  | 1.102934  | -0.571832 |
| C | -0.325485 | -0.250024 | 0.077431  |
| C | 0.692874  | -1.272746 | -0.308397 |
| O | 0.753908  | 3.122565  | 0.533494  |
| C | -0.518913 | 3.338148  | 0.178889  |
| C | -1.027315 | 2.155585  | -0.555427 |
| O | -1.086060 | 4.368478  | 0.434307  |
| C | -2.210779 | 2.175672  | -1.145005 |
| C | 2.564442  | 1.928246  | -0.560790 |
| C | 1.672301  | -1.804591 | 1.941579  |
| O | 4.852557  | -2.315840 | -1.308318 |
| O | -1.615117 | -0.637208 | -0.453013 |
| C | -2.333848 | -1.518506 | 0.260446  |
| O | -1.971754 | -1.949967 | 1.327886  |
| C | -3.627480 | -1.869137 | -0.417755 |
| C | -4.719262 | -0.799934 | -0.238083 |
| C | -5.954537 | -1.195482 | -1.039555 |
| C | -5.066783 | -0.580277 | 1.230262  |
| H | 4.481955  | -1.583875 | 0.584871  |
| H | 3.012002  | -0.333559 | -1.808196 |
| H | 4.829158  | 1.910868  | 1.085095  |
| H | 4.796341  | 0.195294  | 1.483487  |
| H | 3.048450  | -3.484160 | 0.291554  |
| H | 2.453559  | -2.868833 | -1.252129 |
| H | 3.473778  | 1.252979  | 1.974144  |
| H | 0.338389  | 0.904141  | -1.604081 |
| H | -0.424673 | -0.134132 | 1.153913  |
| H | 0.750470  | -1.413685 | -1.384252 |
| H | -2.571831 | 1.344771  | -1.731766 |
| H | -2.842784 | 3.049558  | -1.048730 |
| H | 2.401009  | 1.930655  | -1.638808 |
| H | 1.390931  | 1.295531  | 1.134111  |
| H | 2.989035  | 2.894657  | -0.284914 |
| H | 0.797487  | -1.333154 | 2.382854  |
| H | 2.560125  | -1.257093 | 2.267303  |
| H | 1.758519  | -2.811761 | 2.355263  |
| H | 5.652705  | -1.786631 | -1.394966 |
| H | -3.435216 | -2.013158 | -1.481398 |

|   |           |           |           |
|---|-----------|-----------|-----------|
| H | -3.970147 | -2.814615 | 0.003489  |
| H | -4.337550 | 0.139654  | -0.644700 |
| H | -6.730878 | -0.434007 | -0.952622 |
| H | -5.720028 | -1.319403 | -2.097998 |
| H | -6.368403 | -2.138075 | -0.673080 |
| H | -5.843149 | 0.179763  | 1.328497  |
| H | -4.204214 | -0.251379 | 1.811125  |
| H | -5.441060 | -1.502691 | 1.681107  |

CAM-B3LYP energy = -1154.92658615 a.u.

(2R,6R,7S,8S)-1, Conf. K

|   |           |           |           |
|---|-----------|-----------|-----------|
| C | 3.918042  | -1.718240 | -0.422354 |
| C | 3.455134  | -0.400339 | -0.954038 |
| C | 3.462844  | 0.764871  | -0.314171 |
| C | 4.243786  | 1.069826  | 0.932131  |
| C | 1.587438  | -1.841953 | 0.559722  |
| C | 2.680552  | -2.605921 | -0.147421 |
| C | 1.235032  | 1.791729  | 0.099675  |
| C | -0.009999 | 1.100291  | -0.529888 |
| C | -0.350198 | -0.219246 | 0.199112  |
| C | 0.644738  | -1.267341 | -0.180307 |
| O | 0.824550  | 3.146157  | 0.430190  |
| C | -0.469828 | 3.374702  | 0.177765  |
| C | -1.062833 | 2.173744  | -0.456739 |
| O | -0.993682 | 4.427134  | 0.435338  |
| C | -2.299053 | 2.193484  | -0.924711 |
| C | 2.520003  | 1.862918  | -0.744226 |
| C | 1.742759  | -1.679938 | 2.040556  |
| O | 4.720105  | -2.450529 | -1.353292 |
| O | -1.660200 | -0.642816 | -0.254927 |
| C | -2.338034 | -1.481737 | 0.545540  |
| O | -1.957050 | -1.784057 | 1.650095  |
| C | -3.592749 | -2.004150 | -0.097492 |
| C | -4.613535 | -0.933080 | -0.500363 |
| C | -5.821434 | -1.597821 | -1.151872 |
| C | -5.032559 | -0.079568 | 0.691411  |
| H | 4.477181  | -1.588619 | 0.505552  |
| H | 2.874008  | -0.475281 | -1.869395 |
| H | 4.874034  | 0.246576  | 1.258117  |
| H | 3.590876  | 1.345450  | 1.763789  |
| H | 3.000236  | -3.477945 | 0.425730  |
| H | 2.322512  | -2.954329 | -1.117339 |
| H | 4.888643  | 1.932755  | 0.748277  |
| H | 0.189995  | 0.860852  | -1.574962 |
| H | -0.402440 | -0.049575 | 1.271584  |
| H | 0.641675  | -1.472653 | -1.247162 |
| H | -2.729717 | 1.348081  | -1.437940 |
| H | -2.904668 | 3.082395  | -0.801255 |
| H | 2.279100  | 1.790944  | -1.805016 |
| H | 1.462628  | 1.328696  | 1.058563  |
| H | 2.967282  | 2.842523  | -0.569053 |
| H | 1.830357  | -2.661686 | 2.511101  |
| H | 0.906303  | -1.159495 | 2.500889  |
| H | 2.660216  | -1.136797 | 2.280244  |
| H | 5.520101  | -1.942128 | -1.524454 |
| H | -3.294776 | -2.571816 | -0.982298 |

|   |           |           |           |
|---|-----------|-----------|-----------|
| H | -4.043317 | -2.700210 | 0.610180  |
| H | -4.144474 | -0.285978 | -1.244076 |
| H | -6.544527 | -0.849228 | -1.478539 |
| H | -5.529763 | -2.188311 | -2.021959 |
| H | -6.324701 | -2.263267 | -0.446304 |
| H | -5.758984 | 0.675475  | 0.387802  |
| H | -4.183739 | 0.440371  | 1.139249  |
| H | -5.494465 | -0.697293 | 1.465469  |

CAM-B3LYP energy = -1154.92648677 a.u.

(2R,6R,7S,8S)-1, Conf. L

|   |           |           |           |
|---|-----------|-----------|-----------|
| C | 2.773785  | -2.916373 | -0.273702 |
| C | 3.050818  | -1.480262 | -0.613755 |
| C | 3.504326  | -0.533928 | 0.199064  |
| C | 4.040825  | -0.790412 | 1.577028  |
| C | 0.443075  | -1.975955 | 0.096262  |
| C | 1.418575  | -3.060565 | 0.476270  |
| C | 2.093423  | 1.526512  | 0.426845  |
| C | 0.755116  | 1.240463  | -0.310921 |
| C | -0.226051 | 0.444046  | 0.576500  |
| C | 0.341179  | -0.913004 | 0.891026  |
| O | 2.252608  | 2.970823  | 0.437057  |
| C | 1.243710  | 3.610438  | -0.168533 |
| C | 0.279840  | 2.614987  | -0.695827 |
| O | 1.203445  | 4.811034  | -0.241413 |
| C | -0.764743 | 2.988464  | -1.416388 |
| C | 3.359624  | 0.918248  | -0.184166 |
| C | -0.211593 | -2.140996 | -1.243502 |
| O | 2.697168  | -3.713577 | -1.459878 |
| O | -1.480833 | 0.390277  | -0.127872 |
| C | -2.594811 | 0.210872  | 0.598440  |
| O | -2.585345 | 0.080835  | 1.796945  |
| C | -3.823253 | 0.238742  | -0.269141 |
| C | -5.024084 | -0.499293 | 0.317598  |
| C | -6.276652 | -0.185341 | -0.493924 |
| C | -4.776517 | -2.003502 | 0.378818  |
| H | 3.552018  | -3.327335 | 0.373717  |
| H | 2.674738  | -1.184792 | -1.589324 |
| H | 4.158182  | -1.850224 | 1.791805  |
| H | 3.388311  | -0.369002 | 2.346222  |
| H | 1.622841  | -3.009944 | 1.545518  |
| H | 1.032330  | -4.057856 | 0.257473  |
| H | 5.013927  | -0.308691 | 1.696420  |
| H | 0.948414  | 0.647080  | -1.204522 |
| H | -0.392117 | 0.990451  | 1.504688  |
| H | 0.869598  | -0.944999 | 1.837859  |
| H | -1.459295 | 2.274573  | -1.833432 |
| H | -0.938107 | 4.041120  | -1.601676 |
| H | 3.327622  | 1.039125  | -1.268215 |
| H | 2.020074  | 1.245146  | 1.476198  |
| H | 4.205929  | 1.496787  | 0.191246  |
| H | 0.532931  | -2.408860 | -1.994642 |
| H | -0.751651 | -1.257788 | -1.568183 |
| H | -0.918521 | -2.974664 | -1.202875 |
| H | 3.530060  | -3.627229 | -1.936514 |
| H | -4.064963 | 1.296529  | -0.412790 |

|   |           |           |           |
|---|-----------|-----------|-----------|
| H | -3.566664 | -0.153292 | -1.254923 |
| H | -5.172347 | -0.133202 | 1.336130  |
| H | -6.485753 | 0.885814  | -0.506282 |
| H | -6.163684 | -0.517573 | -1.529008 |
| H | -7.146574 | -0.693284 | -0.075161 |
| H | -5.629861 | -2.518446 | 0.822734  |
| H | -3.896124 | -2.243857 | 0.975940  |
| H | -4.627202 | -2.409570 | -0.625055 |

CAM-B3LYP energy = -1154.92588686 a.u.

(2R,6R,7S,8S)-1, Conf. M

|   |           |           |           |
|---|-----------|-----------|-----------|
| C | 3.496095  | -2.348558 | -0.182226 |
| C | 3.416961  | -0.893806 | -0.547118 |
| C | 3.598945  | 0.147824  | 0.255525  |
| C | 4.140322  | 0.052364  | 1.652285  |
| C | 0.996897  | -2.014803 | 0.129428  |
| C | 2.204736  | -2.812420 | 0.550112  |
| C | 1.717812  | 1.799977  | 0.403728  |
| C | 0.513255  | 1.167933  | -0.349580 |
| C | -0.259632 | 0.173469  | 0.544091  |
| C | 0.618261  | -0.995622 | 0.897290  |
| O | 1.509934  | 3.237750  | 0.371404  |
| C | 0.388263  | 3.587367  | -0.271713 |
| C | -0.279731 | 2.368640  | -0.787812 |
| O | 0.049344  | 4.736907  | -0.381438 |
| C | -1.360499 | 2.449051  | -1.546151 |
| C | 3.111167  | 1.512860  | -0.163864 |
| C | 0.432559  | -2.363803 | -1.216047 |
| O | 3.641970  | -3.158924 | -1.352745 |
| O | -1.451368 | -0.199337 | -0.173059 |
| C | -2.492148 | -0.650423 | 0.544392  |
| O | -2.481168 | -0.721067 | 1.747773  |
| C | -3.625605 | -1.078324 | -0.346622 |
| C | -4.995961 | -1.060008 | 0.325576  |
| C | -5.440650 | 0.364283  | 0.643589  |
| C | -6.019445 | -1.766953 | -0.557010 |
| H | 4.339029  | -2.543324 | 0.485181  |
| H | 3.006858  | -0.715038 | -1.537290 |
| H | 3.378261  | 0.301314  | 2.395683  |
| H | 4.954813  | 0.767225  | 1.789249  |
| H | 2.367164  | -2.690786 | 1.620793  |
| H | 2.085038  | -3.878917 | 0.350543  |
| H | 4.516563  | -0.940233 | 1.889834  |
| H | 0.873227  | 0.618212  | -1.218850 |
| H | -0.571280 | 0.680706  | 1.456641  |
| H | 1.120531  | -0.877627 | 1.851464  |
| H | -1.838866 | 1.573021  | -1.958115 |
| H | -1.786853 | 3.418883  | -1.769822 |
| H | 3.080944  | 1.603640  | -1.250890 |
| H | 1.690933  | 1.536967  | 1.460122  |
| H | 3.778110  | 2.288865  | 0.216932  |
| H | 1.233513  | -2.422909 | -1.954781 |
| H | -0.323455 | -1.664890 | -1.558635 |
| H | -0.018331 | -3.359259 | -1.174503 |
| H | 4.439533  | -2.880830 | -1.816250 |
| H | -3.622216 | -0.458843 | -1.245287 |

|   |           |           |           |
|---|-----------|-----------|-----------|
| H | -3.379795 | -2.093545 | -0.674078 |
| H | -4.911338 | -1.611314 | 1.264951  |
| H | -4.728521 | 0.873440  | 1.293926  |
| H | -5.541665 | 0.950132  | -0.273703 |
| H | -6.408807 | 0.364007  | 1.146630  |
| H | -7.000636 | -1.776469 | -0.080225 |
| H | -5.730174 | -2.800902 | -0.753203 |
| H | -6.121888 | -1.258445 | -1.519029 |

CAM-B3LYP energy = -1154.92587072 a.u.

(2R,6R,7S,8S)-1, Conf. N

|   |           |           |           |
|---|-----------|-----------|-----------|
| C | 3.490792  | -2.357442 | -0.206276 |
| C | 3.426773  | -0.902437 | -0.556840 |
| C | 3.592338  | 0.128357  | 0.261996  |
| C | 4.107676  | 0.014235  | 1.667351  |
| C | 0.993529  | -2.007848 | 0.134349  |
| C | 2.201438  | -2.803129 | 0.555479  |
| C | 1.727042  | 1.800757  | 0.407395  |
| C | 0.520464  | 1.174741  | -0.347814 |
| C | -0.258161 | 0.184091  | 0.544890  |
| C | 0.615453  | -0.987218 | 0.900777  |
| O | 1.531280  | 3.240121  | 0.366528  |
| C | 0.411926  | 3.595251  | -0.277407 |
| C | -0.265826 | 2.379349  | -0.787588 |
| O | 0.081629  | 4.746835  | -0.392245 |
| C | -1.348426 | 2.464890  | -1.542774 |
| C | 3.120669  | 1.500331  | -0.152207 |
| C | 0.429073  | -2.357829 | -1.210921 |
| O | 3.655847  | -3.065022 | -1.436977 |
| O | -1.450149 | -0.185193 | -0.173714 |
| C | -2.491447 | -0.637029 | 0.542651  |
| O | -2.480958 | -0.709439 | 1.745906  |
| C | -3.624290 | -1.063466 | -0.349825 |
| C | -4.993493 | -1.059437 | 0.324821  |
| C | -5.447310 | 0.359353  | 0.654302  |
| C | -6.013720 | -1.766752 | -0.561234 |
| H | 4.343765  | -2.572970 | 0.442309  |
| H | 3.046079  | -0.714652 | -1.556289 |
| H | 4.477081  | -0.982665 | 1.897967  |
| H | 3.334951  | 0.256615  | 2.401717  |
| H | 2.380858  | -2.660132 | 1.621386  |
| H | 2.064834  | -3.874994 | 0.389482  |
| H | 4.922790  | 0.723750  | 1.826801  |
| H | 0.879596  | 0.623062  | -1.216275 |
| H | -0.569580 | 0.693295  | 1.456433  |
| H | 1.115877  | -0.869348 | 1.855755  |
| H | -1.834204 | 1.590955  | -1.950437 |
| H | -1.768604 | 3.437019  | -1.768159 |
| H | 3.098192  | 1.597029  | -1.238923 |
| H | 1.692826  | 1.543729  | 1.465101  |
| H | 3.793165  | 2.267680  | 0.236599  |
| H | 1.227888  | -2.402946 | -1.952979 |
| H | -0.336575 | -1.666458 | -1.547085 |
| H | -0.009205 | -3.359076 | -1.172561 |
| H | 3.713592  | -4.006596 | -1.243315 |
| H | -3.626070 | -0.435885 | -1.242906 |

|   |           |           |           |
|---|-----------|-----------|-----------|
| H | -3.372941 | -2.074067 | -0.687277 |
| H | -4.903500 | -1.617191 | 1.259894  |
| H | -4.737514 | 0.868309  | 1.307301  |
| H | -5.553778 | 0.951348  | -0.258422 |
| H | -6.414634 | 0.348751  | 1.158842  |
| H | -6.994009 | -1.786370 | -0.082901 |
| H | -5.717847 | -2.797280 | -0.765458 |
| H | -6.121226 | -1.251948 | -1.519342 |

CAM-B3LYP energy = -1154.92579317 a.u.

(2R,6R,7S,8S)-1, Conf. O

|   |           |           |           |
|---|-----------|-----------|-----------|
| C | 2.759279  | -2.929041 | -0.303231 |
| C | 3.053601  | -1.497103 | -0.630285 |
| C | 3.489845  | -0.558892 | 0.200102  |
| C | 3.994872  | -0.829646 | 1.587479  |
| C | 0.437932  | -1.971132 | 0.108378  |
| C | 1.416405  | -3.052311 | 0.486499  |
| C | 2.105386  | 1.520485  | 0.428698  |
| C | 0.765113  | 1.242297  | -0.308266 |
| C | -0.220477 | 0.453781  | 0.581128  |
| C | 0.341758  | -0.904382 | 0.898939  |
| O | 2.278448  | 2.963360  | 0.429291  |
| C | 1.273332  | 3.608707  | -0.176288 |
| C | 0.299002  | 2.619227  | -0.695799 |
| O | 1.243282  | 4.809267  | -0.255016 |
| C | -0.745865 | 2.998939  | -1.412679 |
| C | 3.366193  | 0.896671  | -0.176891 |
| C | -0.225407 | -2.141472 | -1.226445 |
| O | 2.714832  | -3.629492 | -1.547968 |
| O | -1.475521 | 0.404864  | -0.122977 |
| C | -2.590086 | 0.228970  | 0.603213  |
| O | -2.581188 | 0.098333  | 1.801658  |
| C | -3.818516 | 0.261241  | -0.264251 |
| C | -5.017523 | -0.484487 | 0.316603  |
| C | -6.270510 | -0.168688 | -0.493548 |
| C | -4.765390 | -1.988333 | 0.367432  |
| H | 3.544927  | -3.364567 | 0.319364  |
| H | 2.707688  | -1.199083 | -1.615527 |
| H | 4.099088  | -1.892225 | 1.795700  |
| H | 3.331781  | -0.408524 | 2.347619  |
| H | 1.650490  | -2.979762 | 1.548874  |
| H | 1.010689  | -4.052021 | 0.310237  |
| H | 4.970137  | -0.358575 | 1.729949  |
| H | 0.954798  | 0.645500  | -1.200502 |
| H | -0.383619 | 1.003487  | 1.507900  |
| H | 0.874366  | -0.933035 | 1.843388  |
| H | -1.448314 | 2.289507  | -1.824033 |
| H | -0.911300 | 4.052397  | -1.600624 |
| H | 3.341913  | 1.022410  | -1.260602 |
| H | 2.028262  | 1.247100  | 1.479855  |
| H | 4.218063  | 1.462613  | 0.205450  |
| H | 0.516787  | -2.394024 | -1.985077 |
| H | -0.781469 | -1.265247 | -1.542405 |
| H | -0.918713 | -2.986408 | -1.183305 |
| H | 2.547569  | -4.560887 | -1.369552 |
| H | -4.062882 | 1.319592  | -0.398861 |

|   |           |           |           |
|---|-----------|-----------|-----------|
| H | -3.561240 | -0.122105 | -1.253227 |
| H | -5.167481 | -0.125983 | 1.337572  |
| H | -6.482747 | 0.901901  | -0.498721 |
| H | -6.155862 | -0.493495 | -1.530798 |
| H | -7.139187 | -0.682043 | -0.078831 |
| H | -5.617375 | -2.508964 | 0.807288  |
| H | -3.884583 | -2.230246 | 0.963373  |
| H | -4.614277 | -2.386953 | -0.639148 |

CAM-B3LYP energy = -1154.92578279 a.u.

(2R,6R,7S,8S)-1, Conf. P

|   |           |           |           |
|---|-----------|-----------|-----------|
| C | 3.996692  | -1.649639 | -0.376862 |
| C | 3.540377  | -0.304892 | -0.847498 |
| C | 3.485353  | 0.815207  | -0.134531 |
| C | 4.175092  | 1.042574  | 1.180231  |
| C | 1.607093  | -1.877560 | 0.442157  |
| C | 2.755456  | -2.575900 | -0.244103 |
| C | 1.219459  | 1.794470  | 0.180358  |
| C | 0.048202  | 1.101948  | -0.574925 |
| C | -0.323980 | -0.252270 | 0.072941  |
| C | 0.695535  | -1.273635 | -0.313467 |
| O | 0.746022  | 3.122790  | 0.533065  |
| C | -0.526344 | 3.335565  | 0.175196  |
| C | -1.030129 | 2.152036  | -0.560756 |
| O | -1.096536 | 4.364515  | 0.429339  |
| C | -2.212338 | 2.169500  | -1.152921 |
| C | 2.562299  | 1.933287  | -0.556625 |
| C | 1.677080  | -1.801832 | 1.936530  |
| O | 4.972411  | -2.255807 | -1.224502 |
| O | -1.613317 | -0.640513 | -0.457168 |
| C | -2.331497 | -1.521751 | 0.256999  |
| O | -1.967606 | -1.954472 | 1.323297  |
| C | -3.627158 | -1.869847 | -0.418563 |
| C | -4.718537 | -0.801699 | -0.229602 |
| C | -5.956278 | -1.193015 | -1.029343 |
| C | -5.061597 | -0.590096 | 1.240982  |
| H | 4.488359  | -1.574229 | 0.589716  |
| H | 3.019775  | -0.320858 | -1.802702 |
| H | 4.782222  | 0.199831  | 1.500227  |
| H | 3.464755  | 1.270489  | 1.978488  |
| H | 3.057033  | -3.480276 | 0.287029  |
| H | 2.455880  | -2.866356 | -1.253881 |
| H | 4.831125  | 1.912397  | 1.094479  |
| H | 0.341241  | 0.904481  | -1.606566 |
| H | -0.422954 | -0.137440 | 1.149560  |
| H | 0.752799  | -1.414569 | -1.389426 |
| H | -2.570304 | 1.337912  | -1.740595 |
| H | -2.846522 | 3.041934  | -1.057761 |
| H | 2.401974  | 1.935801  | -1.635135 |
| H | 1.385551  | 1.296980  | 1.134636  |
| H | 2.983571  | 2.900776  | -0.279536 |
| H | 1.770697  | -2.807765 | 2.351508  |
| H | 0.799282  | -1.335941 | 2.377712  |
| H | 2.560906  | -1.247313 | 2.261216  |
| H | 4.609023  | -2.325985 | -2.114842 |
| H | -3.438674 | -2.008516 | -1.483568 |

|   |           |           |           |
|---|-----------|-----------|-----------|
| H | -3.968147 | -2.817432 | -0.000680 |
| H | -4.338145 | 0.140147  | -0.632269 |
| H | -5.725116 | -1.311141 | -2.089182 |
| H | -6.368891 | -2.137621 | -0.666665 |
| H | -6.732403 | -0.432107 | -0.935789 |
| H | -5.434770 | -1.514915 | 1.687790  |
| H | -5.837497 | 0.169554  | 1.345710  |
| H | -4.197243 | -0.264653 | 1.821098  |

CAM-B3LYP energy = -1154.92571047 a.u.

(2R,6R,7S,8S)-1, Conf. Q

|   |           |           |           |
|---|-----------|-----------|-----------|
| C | 3.995855  | -1.649164 | -0.382837 |
| C | 3.545222  | -0.308125 | -0.855272 |
| C | 3.484246  | 0.809282  | -0.138779 |
| C | 4.169139  | 1.037320  | 1.178617  |
| C | 1.604136  | -1.871855 | 0.442014  |
| C | 2.749220  | -2.569841 | -0.249263 |
| C | 1.221322  | 1.799881  | 0.175628  |
| C | 0.044206  | 1.110801  | -0.573281 |
| C | -0.325427 | -0.243768 | 0.074260  |
| C | 0.695167  | -1.263441 | -0.313202 |
| O | 0.756490  | 3.132841  | 0.522845  |
| C | -0.518475 | 3.347669  | 0.175872  |
| C | -1.032456 | 2.162534  | -0.550519 |
| O | -1.083386 | 4.379380  | 0.430768  |
| C | -2.221061 | 2.180510  | -1.129769 |
| C | 2.563361  | 1.927758  | -0.564476 |
| C | 1.671423  | -1.803267 | 1.936758  |
| O | 4.911216  | -2.200588 | -1.331117 |
| O | -1.614313 | -0.633769 | -0.456359 |
| C | -2.330319 | -1.518309 | 0.255814  |
| O | -1.966802 | -1.950317 | 1.322562  |
| C | -3.623014 | -1.871724 | -0.422771 |
| C | -4.721282 | -0.810985 | -0.232079 |
| C | -5.954339 | -1.206126 | -1.037202 |
| C | -5.069892 | -0.608141 | 1.238418  |
| H | 4.488202  | -1.573014 | 0.587555  |
| H | 3.035809  | -0.327900 | -1.814880 |
| H | 4.784154  | 0.198863  | 1.494674  |
| H | 3.455650  | 1.253189  | 1.977411  |
| H | 3.041783  | -3.479379 | 0.281335  |
| H | 2.456301  | -2.850581 | -1.262047 |
| H | 4.815937  | 1.914559  | 1.098412  |
| H | 0.330337  | 0.914895  | -1.607205 |
| H | -0.424538 | -0.129505 | 1.150943  |
| H | 0.755029  | -1.400464 | -1.389423 |
| H | -2.586914 | 1.347937  | -1.711083 |
| H | -2.852422 | 3.054497  | -1.030300 |
| H | 2.401075  | 1.924617  | -1.642659 |
| H | 1.386087  | 1.306019  | 1.132028  |
| H | 2.988987  | 2.895218  | -0.293770 |
| H | 2.558355  | -1.256154 | 2.265428  |
| H | 1.757541  | -2.811676 | 2.347476  |
| H | 0.795684  | -1.333744 | 2.378233  |
| H | 5.157505  | -3.085954 | -1.040723 |
| H | -3.432071 | -2.005779 | -1.487909 |

|   |           |           |           |
|---|-----------|-----------|-----------|
| H | -3.959040 | -2.822694 | -0.008531 |
| H | -4.345602 | 0.134999  | -0.629434 |
| H | -6.735376 | -0.450414 | -0.942404 |
| H | -5.719397 | -1.317917 | -2.096895 |
| H | -6.362204 | -2.154909 | -0.680090 |
| H | -5.850357 | 0.146662  | 1.344308  |
| H | -4.209103 | -0.280686 | 1.822660  |
| H | -5.439254 | -1.537128 | 1.679707  |

CAM-B3LYP energy = -1154.92570134 a.u.

(2R,6R,7S,8S)-1, Conf. R

|   |           |           |           |
|---|-----------|-----------|-----------|
| C | 3.930338  | -1.713102 | -0.416670 |
| C | 3.463429  | -0.396853 | -0.951805 |
| C | 3.464818  | 0.769477  | -0.315080 |
| C | 4.242609  | 1.077759  | 0.932144  |
| C | 1.589061  | -1.839844 | 0.559172  |
| C | 2.684803  | -2.602922 | -0.144975 |
| C | 1.234264  | 1.792008  | 0.096410  |
| C | -0.010764 | 1.100063  | -0.532554 |
| C | -0.350146 | -0.219439 | 0.196893  |
| C | 0.645234  | -1.267528 | -0.181431 |
| O | 0.823335  | 3.146173  | 0.427334  |
| C | -0.471302 | 3.374132  | 0.175744  |
| C | -1.064036 | 2.173057  | -0.458836 |
| O | -0.995588 | 4.426182  | 0.433911  |
| C | -2.300485 | 2.192361  | -0.926199 |
| C | 2.518880  | 1.863712  | -0.748059 |
| C | 1.746026  | -1.673648 | 2.039436  |
| O | 4.841985  | -2.396347 | -1.276991 |
| O | -1.659831 | -0.643771 | -0.257181 |
| C | -2.336983 | -1.483564 | 0.543050  |
| O | -1.955155 | -1.786660 | 1.647072  |
| C | -3.592241 | -2.005185 | -0.099533 |
| C | -4.615424 | -0.933469 | -0.494755 |
| C | -5.824390 | -1.596575 | -1.145934 |
| C | -5.032113 | -0.085636 | 0.701879  |
| H | 4.481922  | -1.580436 | 0.510635  |
| H | 2.879177  | -0.471220 | -1.866678 |
| H | 4.891475  | 1.937082  | 0.745590  |
| H | 4.870033  | 0.254421  | 1.263450  |
| H | 3.004143  | -3.475054 | 0.428034  |
| H | 2.319481  | -2.955420 | -1.112321 |
| H | 3.588430  | 1.360158  | 1.760495  |
| H | 0.188763  | 0.860588  | -1.577715 |
| H | -0.402601 | -0.049257 | 1.269287  |
| H | 0.641096  | -1.475083 | -1.247939 |
| H | -2.731015 | 1.346933  | -1.439494 |
| H | -2.906449 | 3.080952  | -0.802156 |
| H | 2.277969  | 1.788295  | -1.808621 |
| H | 1.462476  | 1.329025  | 1.055155  |
| H | 2.963894  | 2.844883  | -0.576104 |
| H | 0.908720  | -1.154197 | 2.499282  |
| H | 2.661996  | -1.127033 | 2.276854  |
| H | 1.836887  | -2.653802 | 2.512610  |
| H | 4.424079  | -2.518787 | -2.137283 |
| H | -3.295754 | -2.568190 | -0.987780 |

|   |           |           |           |
|---|-----------|-----------|-----------|
| H | -4.040163 | -2.705088 | 0.606033  |
| H | -4.149144 | -0.282491 | -1.236829 |
| H | -6.549215 | -0.847256 | -1.467063 |
| H | -5.534574 | -2.182667 | -2.019606 |
| H | -6.324945 | -2.265823 | -0.442043 |
| H | -5.760033 | 0.670009  | 0.403428  |
| H | -4.182648 | 0.433172  | 1.149802  |
| H | -5.491430 | -0.707149 | 1.474441  |

CAM-B3LYP energy = -1154.92561704 a.u.

(2R,6R,7S,8S)-1, Conf. S

|   |           |           |           |
|---|-----------|-----------|-----------|
| C | 3.931593  | -1.707173 | -0.423227 |
| C | 3.467647  | -0.395110 | -0.958763 |
| C | 3.461387  | 0.768517  | -0.317401 |
| C | 4.234192  | 1.078694  | 0.932649  |
| C | 1.588872  | -1.834470 | 0.555807  |
| C | 2.682481  | -2.594408 | -0.154193 |
| C | 1.231497  | 1.797131  | 0.092498  |
| C | -0.016949 | 1.106495  | -0.530850 |
| C | -0.351417 | -0.214268 | 0.197755  |
| C | 0.645954  | 1.259121  | -0.183674 |
| O | 0.825571  | 3.154420  | 0.417384  |
| C | -0.470669 | 3.382640  | 0.174910  |
| C | -1.069887 | 2.179333  | -0.449407 |
| O | -0.991788 | 4.436509  | 0.432226  |
| C | -2.311482 | 2.197232  | -0.903034 |
| C | 2.515199  | 1.861196  | -0.753709 |
| C | 1.744206  | -1.675006 | 2.036935  |
| O | 4.780918  | -2.337750 | -1.383464 |
| O | -1.660925 | -0.641764 | -0.254548 |
| C | -2.334214 | -1.484488 | 0.545766  |
| O | -1.950520 | -1.786573 | 1.649446  |
| C | -3.587365 | -2.011811 | -0.096368 |
| C | -4.612380 | -0.945073 | -0.499827 |
| C | -5.817470 | -1.614913 | -1.151307 |
| C | -5.035078 | -0.092919 | 0.691639  |
| H | 4.482299  | -1.573420 | 0.508865  |
| H | 2.893875  | -0.473842 | -1.878183 |
| H | 4.868372  | 0.259261  | 1.260653  |
| H | 3.576691  | 1.350841  | 1.761794  |
| H | 2.993745  | -3.472336 | 0.417356  |
| H | 2.325339  | -2.935866 | -1.126868 |
| H | 4.875016  | 1.945071  | 0.750911  |
| H | 0.176960  | 0.869221  | -1.577598 |
| H | -0.402503 | -0.045357 | 1.270415  |
| H | 0.643786  | -1.462146 | -1.250955 |
| H | -2.747984 | 1.350264  | -1.408604 |
| H | -2.915690 | 3.086479  | -0.775146 |
| H | 2.272859  | 1.780363  | -1.813519 |
| H | 1.459033  | 1.337838  | 1.053201  |
| H | 2.961853  | 2.842676  | -0.587552 |
| H | 1.834821  | -2.657208 | 2.505977  |
| H | 0.906213  | -1.157891 | 2.498202  |
| H | 2.659892  | -1.129269 | 2.277339  |
| H | 5.033457  | -3.204940 | -1.047144 |
| H | -3.287441 | -2.579080 | -0.980794 |

|   |           |           |           |
|---|-----------|-----------|-----------|
| H | -4.035030 | -2.709120 | 0.611930  |
| H | -4.145860 | -0.296404 | -1.243811 |
| H | -6.543580 | -0.869385 | -1.478268 |
| H | -5.523257 | -2.204440 | -2.021189 |
| H | -6.318079 | -2.282214 | -0.445600 |
| H | -5.763927 | 0.659604  | 0.387594  |
| H | -4.188333 | 0.429924  | 1.140026  |
| H | -5.495287 | -0.712227 | 1.465436  |

CAM-B3LYP energy = -1154.92561480 a.u.

(2R,6R,7S,8S)-1, Conf. T

|   |           |           |           |
|---|-----------|-----------|-----------|
| C | 2.727362  | -2.835968 | -0.303005 |
| C | 2.898915  | -1.460242 | -0.861333 |
| C | 3.375320  | -0.395734 | -0.223327 |
| C | 4.155260  | -0.428092 | 1.060379  |
| C | 0.550332  | -1.923979 | 0.609829  |
| C | 1.219688  | -3.094240 | -0.068142 |
| C | 1.836547  | 1.544896  | 0.089090  |
| C | 0.414822  | 1.428165  | -0.534549 |
| C | -0.454323 | 0.385733  | 0.203981  |
| C | -0.009640 | -0.993388 | -0.156460 |
| O | 2.065063  | 2.963115  | 0.311817  |
| C | 0.984607  | 3.710286  | 0.056973  |
| C | -0.092433 | 2.846372  | -0.483090 |
| O | 0.973125  | 4.899003  | 0.245287  |
| C | -1.236072 | 3.370592  | -0.892087 |
| C | 3.028309  | 0.990548  | -0.709623 |
| C | 0.702228  | -1.842463 | 2.097653  |
| O | 3.160817  | -3.864022 | -1.197944 |
| O | -1.813948 | 0.572173  | -0.256967 |
| C | -2.808125 | 0.235578  | 0.579776  |
| O | -2.615195 | -0.165819 | 1.701854  |
| C | -4.161922 | 0.415434  | -0.049164 |
| C | -4.804146 | -0.904597 | -0.522958 |
| C | -3.947249 | -1.616217 | -1.565233 |
| C | -5.159310 | -1.834101 | 0.632629  |
| H | 3.257893  | -2.940241 | 0.644577  |
| H | 2.385584  | -1.301805 | -1.806190 |
| H | 5.115016  | 0.072217  | 0.909274  |
| H | 4.357463  | -1.435070 | 1.415563  |
| H | 1.112803  | -4.012856 | 0.511305  |
| H | 0.773118  | -3.262247 | -1.049277 |
| H | 3.647295  | 0.115454  | 1.860393  |
| H | 0.495672  | 1.115573  | -1.576959 |
| H | -0.431832 | 0.572578  | 1.274780  |
| H | -0.062578 | -1.181142 | -1.225153 |
| H | -2.020623 | 2.772897  | -1.329571 |
| H | -1.397481 | 4.436557  | -0.791656 |
| H | 2.800120  | 0.993926  | -1.775732 |
| H | 1.832021  | 1.102082  | 1.084350  |
| H | 3.864956  | 1.671660  | -0.545506 |
| H | 0.327028  | -2.759987 | 2.556252  |
| H | 0.164129  | -1.003923 | 2.533089  |
| H | 1.754751  | -1.760728 | 2.379969  |
| H | 4.105803  | -3.752716 | -1.347474 |
| H | -4.805698 | 0.878633  | 0.699116  |

|   |           |           |           |
|---|-----------|-----------|-----------|
| H | -4.071801 | 1.095460  | -0.894870 |
| H | -5.737944 | -0.605397 | -1.006182 |
| H | -4.473708 | -2.485665 | -1.961237 |
| H | -3.705745 | -0.957754 | -2.401144 |
| H | -3.007064 | -1.968520 | -1.134551 |
| H | -5.695429 | -2.708674 | 0.260683  |
| H | -5.797008 | -1.333335 | 1.363037  |
| H | -4.266667 | -2.184084 | 1.152709  |

CAM-B3LYP energy = -1154.92553407 a.u.

(2R,6R,7S,8S)-1, Conf. U

|   |           |           |           |
|---|-----------|-----------|-----------|
| C | 3.808050  | -2.037725 | 0.389137  |
| C | 3.690273  | -0.536006 | 0.316775  |
| C | 3.383836  | 0.237256  | -0.720046 |
| C | 3.355427  | -0.206492 | -2.151171 |
| C | 1.292408  | -1.893508 | 0.738010  |
| C | 2.428103  | -2.727826 | 0.205072  |
| C | 1.609458  | 1.688704  | 0.326267  |
| C | 0.317454  | 1.283834  | -0.435952 |
| C | -0.304807 | -0.003191 | 0.145779  |
| C | 0.598866  | -1.159196 | -0.126354 |
| O | 1.399590  | 3.049904  | 0.789449  |
| C | 0.191885  | 3.529292  | 0.466986  |
| C | -0.544975 | 2.511801  | -0.321193 |
| O | -0.164262 | 4.631831  | 0.792542  |
| C | -1.734395 | 2.775638  | -0.835962 |
| C | 2.927244  | 1.658968  | -0.448496 |
| C | 1.138997  | -1.849849 | 2.227572  |
| O | 4.667757  | -2.632177 | -0.585200 |
| O | -1.562057 | -0.192859 | -0.545791 |
| C | -2.512724 | -0.906493 | 0.076472  |
| O | -2.391691 | -1.326155 | 1.200581  |
| C | -3.703397 | -1.133988 | -0.814029 |
| C | -5.015576 | -1.349083 | -0.063535 |
| C | -5.461802 | -0.077190 | 0.651223  |
| C | -6.092631 | -1.841376 | -1.024606 |
| H | 4.188025  | -2.285632 | 1.384081  |
| H | 3.681895  | -0.067291 | 1.297493  |
| H | 3.633199  | -1.250289 | -2.263786 |
| H | 4.049672  | 0.400438  | -2.739022 |
| H | 2.467377  | -3.709768 | 0.680273  |
| H | 2.297818  | -2.879826 | -0.866495 |
| H | 2.366751  | -0.049634 | -2.589620 |
| H | 0.546762  | 1.096215  | -1.485706 |
| H | -0.513559 | 0.128546  | 1.204920  |
| H | 0.799496  | -1.297639 | -1.184395 |
| H | -2.269255 | 2.060059  | -1.442093 |
| H | -2.194401 | 3.738389  | -0.652021 |
| H | 2.811788  | 2.217582  | -1.379081 |
| H | 1.714623  | 1.089528  | 1.228550  |
| H | 3.664404  | 2.189108  | 0.156547  |
| H | 1.046723  | -2.865780 | 2.617671  |
| H | 0.265819  | -1.285887 | 2.546478  |
| H | 2.022623  | -1.413640 | 2.701461  |
| H | 5.545783  | -2.249092 | -0.483278 |
| H | -3.785837 | -0.303121 | -1.516697 |

|   |           |           |           |
|---|-----------|-----------|-----------|
| H | -3.462647 | -2.018904 | -1.411607 |
| H | -4.843858 | -2.123243 | 0.687902  |
| H | -6.384535 | -0.249411 | 1.207351  |
| H | -4.709083 | 0.274183  | 1.358048  |
| H | -5.650674 | 0.723208  | -0.068833 |
| H | -7.031863 | -2.014628 | -0.497356 |
| H | -5.799827 | -2.775668 | -1.506822 |
| H | -6.282088 | -1.103564 | -1.808318 |

CAM-B3LYP energy = -1154.92544501 a.u.

(2R,6R,7S,8S)-1, Conf. V

|   |           |           |           |
|---|-----------|-----------|-----------|
| C | 3.343922  | -2.505761 | 0.344449  |
| C | 3.503491  | -1.010250 | 0.233117  |
| C | 3.288802  | -0.215417 | -0.810538 |
| C | 3.102332  | -0.676135 | -2.224444 |
| C | 0.919546  | -1.889759 | 0.805589  |
| C | 1.852748  | -2.928978 | 0.241042  |
| C | 1.873305  | 1.561402  | 0.279509  |
| C | 0.489385  | 1.390970  | -0.405079 |
| C | -0.330188 | 0.253139  | 0.239581  |
| C | 0.327857  | -1.055682 | -0.044016 |
| O | 1.945292  | 2.945973  | 0.714095  |
| C | 0.831216  | 3.636116  | 0.440386  |
| C | -0.123496 | 2.759991  | -0.280979 |
| O | 0.704073  | 4.791291  | 0.753149  |
| C | -1.270301 | 3.231411  | -0.741604 |
| C | 3.117606  | 1.271719  | -0.560308 |
| C | 0.854221  | -1.791483 | 2.299183  |
| O | 4.030838  | -3.270309 | -0.648385 |
| O | -1.633653 | 0.291325  | -0.388282 |
| C | -2.677108 | -0.183818 | 0.308164  |
| O | -2.576959 | -0.627105 | 1.425141  |
| C | -3.961171 | -0.042189 | -0.463156 |
| C | -5.059009 | -1.015327 | -0.040591 |
| C | -6.387205 | -0.608933 | -0.670653 |
| C | -4.698955 | -2.452275 | -0.405128 |
| H | 3.719164  | -2.799563 | 1.328625  |
| H | 3.635023  | -0.528004 | 1.198261  |
| H | 3.863316  | -0.219798 | -2.863613 |
| H | 2.137055  | -0.348915 | -2.618920 |
| H | 1.732714  | -3.894011 | 0.737004  |
| H | 1.643059  | -3.069075 | -0.819362 |
| H | 3.178325  | -1.755341 | -2.319241 |
| H | 0.622916  | 1.145596  | -1.459535 |
| H | -0.455926 | 0.440222  | 1.303386  |
| H | 0.442877  | -1.247717 | -1.106507 |
| H | -1.960950 | 2.617212  | -1.299664 |
| H | -1.533517 | 4.266131  | -0.561371 |
| H | 3.054657  | 1.822202  | -1.500679 |
| H | 1.916248  | 0.970212  | 1.192277  |
| H | 3.972624  | 1.668708  | -0.010880 |
| H | 0.108081  | -1.079368 | 2.643348  |
| H | 1.822761  | -1.504791 | 2.718131  |
| H | 0.609818  | -2.768449 | 2.721711  |
| H | 4.967892  | -3.052495 | -0.597816 |
| H | -4.292650 | 0.989034  | -0.305649 |

|   |           |           |           |
|---|-----------|-----------|-----------|
| H | -3.744383 | -0.135063 | -1.528778 |
| H | -5.158489 | -0.950885 | 1.045429  |
| H | -7.184638 | -1.287417 | -0.364163 |
| H | -6.674497 | 0.402572  | -0.378045 |
| H | -6.326168 | -0.638293 | -1.761527 |
| H | -5.477365 | -3.141969 | -0.075227 |
| H | -3.761618 | -2.762854 | 0.057820  |
| H | -4.595040 | -2.559723 | -1.487926 |

CAM-B3LYP energy = -1154.92543703 a.u.

|   |          |           |           |
|---|----------|-----------|-----------|
| H | 3.571125 | -0.455956 | 1.380954  |
| H | 3.317495 | -2.112249 | 0.881444  |
| H | 4.961298 | -1.761789 | -0.997053 |
| H | 6.506134 | 0.175937  | -0.886490 |
| H | 4.851409 | 0.724777  | -1.142123 |
| H | 5.586273 | 0.847715  | 0.460862  |
| H | 6.970347 | -1.920635 | 0.466470  |
| H | 5.636935 | -2.880611 | 1.111861  |
| H | 6.030628 | -1.316416 | 1.831160  |

CAM-B3LYP energy = -1154.92784840 a.u.

(2S,6R,7S,8S)-1, Conf. A

|   |           |           |           |
|---|-----------|-----------|-----------|
| C | -3.531833 | -2.223358 | -0.107740 |
| C | -3.553036 | -0.737726 | -0.287337 |
| C | -3.399914 | 0.195450  | 0.647942  |
| C | -3.457884 | -0.041545 | 2.128930  |
| C | -1.031412 | -1.995127 | -0.204209 |
| C | -2.216204 | -2.793502 | -0.687135 |
| C | -1.735938 | 1.674706  | -0.539270 |
| C | -0.472112 | 1.178981  | 0.210251  |
| C | 0.317499  | 0.139651  | -0.616254 |
| C | -0.552962 | -1.030815 | -0.985860 |
| O | -1.478716 | 3.061808  | -0.888705 |
| C | -0.362731 | 3.537314  | -0.316535 |
| C | 0.289740  | 2.450415  | 0.455028  |
| O | -0.013147 | 4.680318  | -0.453518 |
| C | 1.344836  | 2.674734  | 1.219840  |
| C | -3.049456 | 1.614370  | 0.239399  |
| C | -0.594178 | -2.281784 | 1.201621  |
| O | -4.585872 | -2.876337 | -0.820844 |
| O | 1.463515  | -0.214774 | 0.181801  |
| C | 2.534177  | -0.715039 | -0.455273 |
| O | 2.587322  | -0.840003 | -1.652945 |
| C | 3.607310  | -1.121639 | 0.516655  |
| C | 5.011640  | -1.170819 | -0.079533 |
| C | 5.514224  | 0.225147  | -0.434750 |
| C | 5.965566  | -1.864271 | 0.887668  |
| H | -3.599235 | -2.488061 | 0.948652  |
| H | -3.524411 | -0.431525 | -1.330658 |
| H | -3.753566 | -1.053818 | 2.392752  |
| H | -4.178924 | 0.646361  | 2.577397  |
| H | -2.293536 | -2.739884 | -1.773924 |
| H | -2.143176 | -3.845730 | -0.405268 |
| H | -2.496625 | 0.169477  | 2.604520  |
| H | -0.749508 | 0.707286  | 1.150901  |
| H | 0.682920  | 0.609049  | -1.529273 |
| H | -0.956551 | -0.959585 | -1.989784 |
| H | 1.805369  | 1.889057  | 1.801443  |
| H | 1.769733  | 3.668972  | 1.276323  |
| H | -2.962796 | 2.249289  | 1.123271  |
| H | -1.854399 | 1.159144  | -1.487868 |
| H | -3.829437 | 2.048420  | -0.388880 |
| H | -0.214097 | -3.305042 | 1.262331  |
| H | -1.440303 | -2.227679 | 1.889600  |
| H | 0.183954  | -1.611316 | 1.552072  |
| H | -5.425869 | -2.564114 | -0.467659 |

(2S,6R,7S,8S)-1, Conf. B

|   |           |           |           |
|---|-----------|-----------|-----------|
| C | -2.900298 | -2.750672 | -0.044967 |
| C | -3.261011 | -1.311839 | -0.244367 |
| C | -3.309134 | -0.352564 | 0.675734  |
| C | -3.288434 | -0.571514 | 2.160571  |
| C | -0.518161 | -1.964106 | -0.195985 |
| C | -1.499162 | -3.018790 | -0.642906 |
| C | -2.043563 | 1.451020  | -0.557739 |
| C | -0.690755 | 1.253963  | 0.175060  |
| C | 0.300897  | 0.413688  | -0.659562 |
| C | -0.286984 | -0.929157 | -0.999153 |
| O | -2.109534 | 2.859193  | -0.910631 |
| C | -1.124062 | 3.575308  | -0.349535 |
| C | -0.232327 | 2.664768  | 0.410817  |
| O | -1.044271 | 4.767799  | -0.487437 |
| C | 0.756119  | 3.124631  | 1.159244  |
| C | -3.297685 | 1.102093  | 0.243273  |
| C | 0.000299  | -2.120207 | 1.202758  |
| O | -3.790564 | -3.638342 | -0.727329 |
| O | 1.511134  | 0.339329  | 0.118800  |
| C | 2.660266  | 0.113482  | -0.536252 |
| O | 2.715782  | -0.048076 | -1.729644 |
| C | 3.838046  | 0.134243  | 0.399053  |
| C | 5.033023  | -0.686903 | -0.079872 |
| C | 6.252499  | -0.387103 | 0.785497  |
| C | 4.716974  | -2.179527 | -0.080217 |
| H | -2.888903 | -3.004172 | 1.016152  |
| H | -3.319067 | -1.025081 | -1.291857 |
| H | -2.389316 | -0.146630 | 2.614219  |
| H | -3.348815 | -1.619410 | 2.443820  |
| H | -1.604937 | -3.003987 | -1.728539 |
| H | -1.184771 | -4.021914 | -0.348042 |
| H | -4.135656 | -0.051686 | 2.614531  |
| H | -0.844535 | 0.732207  | 1.117498  |
| H | 0.533791  | 0.941674  | -1.584051 |
| H | -0.714428 | -0.967949 | -1.994809 |
| H | 1.393113  | 2.466392  | 1.732441  |
| H | 0.944139  | 4.189731  | 1.209533  |
| H | -3.345115 | 1.754075  | 1.117673  |
| H | -2.057584 | 0.919274  | -1.504650 |
| H | -4.165469 | 1.337122  | -0.375778 |
| H | -0.820877 | -2.272785 | 1.905739  |
| H | 0.593134  | -1.274454 | 1.536084  |
| H | 0.624877  | -3.015739 | 1.260778  |
| H | -4.672618 | -3.521187 | -0.358500 |



|   |          |           |           |
|---|----------|-----------|-----------|
| H | 4.121390 | 1.186584  | 0.500244  |
| H | 3.509664 | -0.192165 | 1.387302  |
| H | 5.254375 | -0.381775 | -1.105209 |
| H | 7.119059 | -0.954695 | 0.443401  |
| H | 6.511052 | 0.672854  | 0.756144  |
| H | 6.066816 | -0.658741 | 1.827709  |
| H | 5.566697 | -2.754898 | -0.450746 |
| H | 3.858721 | -2.410597 | -0.712435 |
| H | 4.495622 | -2.526176 | 0.932541  |

CAM-B3LYP energy = -1154.92782917 a.u.

(2S,6R,7S,8S)-1, Conf. C

|   |           |           |           |
|---|-----------|-----------|-----------|
| C | -3.841831 | -2.023162 | 0.129713  |
| C | -3.687275 | -0.535128 | 0.007942  |
| C | -3.363174 | 0.337131  | 0.954604  |
| C | -3.321502 | 0.025540  | 2.419697  |
| C | -1.354307 | -1.952970 | -0.456796 |
| C | -2.460997 | -2.737774 | 0.200321  |
| C | -1.613161 | 1.659164  | -0.294492 |
| C | -0.296124 | 1.288409  | 0.440218  |
| C | 0.287239  | -0.043215 | -0.077433 |
| C | -0.610824 | -1.167517 | 0.317108  |
| O | -1.400361 | 2.973884  | -0.875289 |
| C | -0.175060 | 3.456943  | -0.634359 |
| C | 0.574893  | 2.492809  | 0.206843  |
| O | 0.184481  | 4.523968  | -1.059293 |
| C | 1.782086  | 2.779259  | 0.665190  |
| C | -2.890988 | 1.719087  | 0.541564  |
| C | -1.281463 | -2.016021 | -1.951404 |
| O | -4.531617 | -2.549477 | -1.008422 |
| O | 1.572666  | -0.199335 | 0.569731  |
| C | 2.498406  | -0.943850 | -0.053040 |
| O | 2.333357  | -1.421021 | -1.148376 |
| C | 3.725928  | -1.125736 | 0.796997  |
| C | 5.015094  | -1.311153 | -0.000616 |
| C | 5.392994  | -0.035261 | -0.746768 |
| C | 6.142591  | -1.757969 | 0.923963  |
| H | -4.396020 | -2.293095 | 1.032156  |
| H | -3.681753 | -0.195760 | -1.024960 |
| H | -3.916720 | 0.754376  | 2.974969  |
| H | -2.302677 | 0.097100  | 2.809462  |
| H | -2.586761 | -3.723619 | -0.250437 |
| H | -2.217432 | -2.883005 | 1.252614  |
| H | -3.700169 | -0.968285 | 2.650037  |
| H | -0.484303 | 1.173820  | 1.508484  |
| H | 0.449385  | 0.011226  | -1.151241 |
| H | -0.754326 | -1.232510 | 1.392062  |
| H | 2.326875  | 2.104688  | 1.308496  |
| H | 2.247231  | 3.718979  | 0.395272  |
| H | -2.719165 | 2.349140  | 1.416228  |
| H | -1.771783 | 0.993499  | -1.140277 |
| H | -3.649145 | 2.214834  | -0.067170 |
| H | -0.446105 | -1.452039 | -2.359746 |
| H | -2.207023 | -1.650979 | -2.402231 |
| H | -1.174945 | -3.055996 | -2.267999 |
| H | -5.387203 | -2.111308 | -1.073998 |

|   |          |           |           |
|---|----------|-----------|-----------|
| H | 3.810031 | -0.284715 | 1.486959  |
| H | 3.533822 | -2.011544 | 1.410637  |
| H | 4.838176 | -2.099871 | -0.735530 |
| H | 6.298032 | -0.185398 | -1.337250 |
| H | 4.602251 | 0.283636  | -1.427197 |
| H | 5.584264 | 0.779698  | -0.043895 |
| H | 7.065804 | -1.909952 | 0.362935  |
| H | 5.896959 | -2.694080 | 1.428476  |
| H | 6.339356 | -1.004505 | 1.690820  |

CAM-B3LYP energy = -1154.92778537 a.u.

(2S,6R,7S,8S)-1, Conf. D

|   |           |           |           |
|---|-----------|-----------|-----------|
| C | -3.344399 | -2.524854 | 0.185327  |
| C | -3.485778 | -1.032598 | 0.103720  |
| C | -3.270083 | -0.135981 | 1.058546  |
| C | -3.073373 | -0.467846 | 2.506450  |
| C | -0.954409 | -1.962479 | -0.529873 |
| C | -1.850265 | -2.960541 | 0.158686  |
| C | -1.886267 | 1.525525  | -0.241420 |
| C | -0.480170 | 1.402911  | 0.406383  |
| C | 0.314159  | 0.216556  | -0.179196 |
| C | -0.328683 | -1.066901 | 0.228525  |
| O | -1.966902 | 2.868286  | -0.790913 |
| C | -0.843360 | 3.573234  | -0.608803 |
| C | 0.129570  | 2.755683  | 0.155905  |
| O | -0.722026 | 4.697295  | -1.021329 |
| C | 1.287772  | 3.260142  | 0.547831  |
| C | -3.097701 | 1.319736  | 0.666826  |
| C | -0.962260 | -1.975260 | -2.027467 |
| O | -3.986740 | -3.150155 | -0.930264 |
| O | 1.641420  | 0.300279  | 0.392366  |
| C | 2.661963  | -0.206988 | -0.315222 |
| O | 2.523704  | -0.718486 | -1.398465 |
| C | 3.973038  | -0.006499 | 0.395243  |
| C | 5.071474  | -0.981003 | -0.022073 |
| C | 6.414626  | -0.522635 | 0.536592  |
| C | 4.751872  | -2.404123 | 0.425502  |
| H | -3.782167 | -2.915840 | 1.107250  |
| H | -3.612368 | -0.675946 | -0.915595 |
| H | -3.234716 | -1.522110 | 2.722465  |
| H | -2.065061 | -0.206656 | 2.838164  |
| H | -1.811468 | -3.941728 | -0.317308 |
| H | -1.522355 | -3.079399 | 1.191227  |
| H | -3.762152 | 0.115953  | 3.121730  |
| H | -0.576963 | 1.238763  | 1.480464  |
| H | 0.398414  | 0.319883  | -1.258248 |
| H | -0.394320 | -1.182111 | 1.306780  |
| H | 1.992127  | 2.691780  | 1.136557  |
| H | 1.546695  | 4.276268  | 0.277978  |
| H | -2.994971 | 1.951062  | 1.551260  |
| H | -1.965780 | 0.859389  | -1.098128 |
| H | -3.972819 | 1.673713  | 0.119154  |
| H | -0.276522 | -1.251601 | -2.461768 |
| H | -1.966528 | -1.783670 | -2.412206 |
| H | -0.679662 | -2.967531 | -2.386215 |
| H | -4.913073 | -2.884972 | -0.934695 |

|   |          |           |           |
|---|----------|-----------|-----------|
| H | 4.278722 | 1.021121  | 0.174722  |
| H | 3.799861 | -0.049748 | 1.472015  |
| H | 5.129105 | -0.968232 | -1.112941 |
| H | 7.212633 | -1.201162 | 0.231788  |
| H | 6.671404 | 0.478563  | 0.185996  |
| H | 6.395210 | -0.501186 | 1.629172  |
| H | 5.530600 | -3.096021 | 0.100933  |
| H | 3.804313 | -2.753492 | 0.013958  |
| H | 4.689844 | -2.459320 | 1.515434  |

CAM-B3LYP energy = -1154.92769101 a.u.

(2S,6R,7S,8S)-1, Conf. E

|   |           |           |           |
|---|-----------|-----------|-----------|
| C | -3.857757 | -2.014195 | 0.103445  |
| C | -3.706411 | -0.527541 | 0.005040  |
| C | -3.360809 | 0.327482  | 0.958653  |
| C | -3.298005 | -0.005558 | 2.418405  |
| C | -1.358001 | -1.948328 | -0.432548 |
| C | -2.469149 | -2.719561 | 0.230029  |
| C | -1.616296 | 1.662979  | -0.282994 |
| C | -0.293483 | 1.296249  | 0.443788  |
| C | 0.286359  | -0.038365 | -0.069754 |
| C | -0.611507 | -1.159027 | 0.334719  |
| O | -1.412553 | 2.981086  | -0.859887 |
| C | -0.185184 | 3.464705  | -0.632330 |
| C | 0.575725  | 2.499654  | 0.197994  |
| O | 0.168471  | 4.533086  | -1.058967 |
| C | 1.789714  | 2.785414  | 0.638536  |
| C | -2.891917 | 1.713886  | 0.557413  |
| C | -1.287170 | -2.021750 | -1.926788 |
| O | -4.548813 | -2.420565 | -1.079718 |
| O | 1.574665  | -0.192044 | 0.572685  |
| C | 2.495546  | -0.943794 | -0.048410 |
| O | 2.323788  | -1.430098 | -1.138708 |
| C | 3.727393  | -1.120602 | 0.796464  |
| C | 5.011760  | -1.315029 | -0.006757 |
| C | 5.387206  | -0.046310 | -0.766261 |
| C | 6.143801  | -1.755380 | 0.915362  |
| H | -4.449394 | -2.300915 | 0.977053  |
| H | -3.727619 | -0.173488 | -1.021952 |
| H | -2.278367 | 0.082319  | 2.802103  |
| H | -3.654598 | -1.010370 | 2.636622  |
| H | -2.565911 | -3.727602 | -0.181287 |
| H | -2.248966 | -2.823061 | 1.292955  |
| H | -3.904708 | 0.701571  | 2.989350  |
| H | -0.474110 | 1.187983  | 1.514114  |
| H | 0.443844  | 0.010450  | -1.144520 |
| H | -0.752756 | -1.215696 | 1.410224  |
| H | 2.343763  | 2.110710  | 1.273670  |
| H | 2.251051  | 3.724979  | 0.361617  |
| H | -2.719234 | 2.337282  | 1.436691  |
| H | -1.775623 | 0.999340  | -1.130469 |
| H | -3.651813 | 2.213308  | -0.046030 |
| H | -1.194593 | -3.064940 | -2.237366 |
| H | -0.444245 | -1.471473 | -2.338179 |
| H | -2.208484 | -1.647156 | -2.378192 |
| H | -4.681675 | -3.373573 | -1.044728 |

|   |          |           |           |
|---|----------|-----------|-----------|
| H | 3.816788 | -0.273743 | 1.478606  |
| H | 3.537247 | -2.000723 | 1.418824  |
| H | 4.829554 | -2.109912 | -0.733679 |
| H | 6.289062 | -0.202702 | -1.359981 |
| H | 4.593317 | 0.267282  | -1.445493 |
| H | 5.582872 | 0.774689  | -0.071674 |
| H | 7.063664 | -1.913484 | 0.350540  |
| H | 5.899730 | -2.686757 | 1.429320  |
| H | 6.345858 | -0.995616 | 1.674589  |

CAM-B3LYP energy = -1154.92768187 a.u.

(2S,6R,7S,8S)-1, Conf. F

|   |           |           |           |
|---|-----------|-----------|-----------|
| C | -3.351078 | -2.527916 | 0.165028  |
| C | -3.498390 | -1.038826 | 0.106531  |
| C | -3.262062 | -0.154315 | 1.066720  |
| C | -3.042567 | -0.502278 | 2.507661  |
| C | -0.950077 | -1.957775 | -0.516160 |
| C | -1.845980 | -2.950665 | 0.177258  |
| C | -1.892860 | 1.523742  | -0.227690 |
| C | -0.480856 | 1.410170  | 0.409256  |
| C | 0.314198  | 0.224940  | -0.177151 |
| C | -0.323276 | -1.058788 | 0.237459  |
| O | -1.987623 | 2.867863  | -0.772108 |
| C | -0.865211 | 3.577736  | -0.604037 |
| C | 0.120830  | 2.764724  | 0.148743  |
| O | -0.753977 | 4.702431  | -1.017848 |
| C | 1.282262  | 3.274201  | 0.524332  |
| C | -3.097171 | 1.305544  | 0.687306  |
| C | -0.960616 | -1.974710 | -2.013795 |
| O | -4.033439 | -3.039550 | -0.981817 |
| O | 1.644145  | 0.314087  | 0.387642  |
| C | 2.661376  | -0.197709 | -0.321326 |
| O | 2.518218  | -0.715163 | -1.401142 |
| C | 3.975869  | 0.005443  | 0.382048  |
| C | 5.067155  | -0.981309 | -0.025468 |
| C | 6.414644  | -0.524375 | 0.523781  |
| C | 4.739757  | -2.396504 | 0.441297  |
| H | -3.811977 | -2.940920 | 1.066297  |
| H | -3.653821 | -0.673391 | -0.904913 |
| H | -3.197683 | -1.559746 | 2.712626  |
| H | -3.726809 | 0.070004  | 3.138735  |
| H | -1.773020 | -3.944623 | -0.271069 |
| H | -1.538979 | -3.042418 | 1.219558  |
| H | -2.031773 | -0.240395 | 2.830803  |
| H | -0.568845 | 1.250431  | 1.484798  |
| H | 0.392629  | 0.325614  | -1.256907 |
| H | -0.384423 | -1.170163 | 1.316187  |
| H | 1.996711  | 2.709672  | 1.104484  |
| H | 1.533427  | 4.290885  | 0.249326  |
| H | -2.991198 | 1.929953  | 1.576273  |
| H | -1.973529 | 0.859664  | -1.086037 |
| H | -3.976759 | 1.660972  | 0.147873  |
| H | -0.261475 | -1.265008 | -2.449759 |
| H | -1.961467 | -1.764934 | -2.397718 |
| H | -0.696849 | -2.972840 | -2.370667 |
| H | -3.988566 | -4.001156 | -0.961304 |

|   |          |           |           |
|---|----------|-----------|-----------|
| H | 4.286874 | 1.027928  | 0.145694  |
| H | 3.806348 | -0.021729 | 1.459876  |
| H | 5.121913 | -0.982988 | -1.116549 |
| H | 7.207533 | -1.211741 | 0.225488  |
| H | 6.676735 | 0.470653  | 0.159841  |
| H | 6.398338 | -0.489004 | 1.616047  |
| H | 5.513430 | -3.097388 | 0.124010  |
| H | 3.789116 | -2.745420 | 0.036449  |
| H | 4.679830 | -2.437229 | 1.531979  |

CAM-B3LYP energy = -1154.92760000 a.u.

(2S,6R,7S,8S)-1, Conf. G

|   |           |           |           |
|---|-----------|-----------|-----------|
| C | -3.278925 | -2.404362 | 0.261738  |
| C | -3.362566 | -0.907479 | 0.332539  |
| C | -2.956333 | -0.108331 | 1.311653  |
| C | -2.543073 | -0.575604 | 2.674241  |
| C | -1.014013 | -1.849619 | -0.791071 |
| C | -1.832129 | -2.882170 | -0.057975 |
| C | -1.718012 | 1.614975  | -0.052249 |
| C | -0.235328 | 1.387955  | 0.348863  |
| C | 0.404097  | 0.238390  | -0.457892 |
| C | -0.226537 | -1.057069 | -0.069700 |
| O | -1.820062 | 3.003025  | -0.469897 |
| C | -0.650854 | 3.652461  | -0.407325 |
| C | 0.389183  | 2.738423  | 0.123991  |
| O | -0.542878 | 4.804647  | -0.737676 |
| C | 1.614781  | 3.168062  | 0.374331  |
| C | -2.780427 | 1.370166  | 1.018648  |
| C | -1.270648 | -1.710197 | -2.259985 |
| O | -4.127220 | -2.904874 | -0.776717 |
| O | 1.804742  | 0.226773  | -0.094865 |
| C | 2.678297  | -0.279257 | -0.977236 |
| O | 2.354823  | -0.682672 | -2.067708 |
| C | 4.081223  | -0.266575 | -0.438377 |
| C | 4.265729  | -1.109843 | 0.831108  |
| C | 3.914990  | -2.573233 | 0.583367  |
| C | 5.694292  | -0.965975 | 1.343678  |
| H | -3.573364 | -2.864815 | 1.208093  |
| H | -3.635876 | -0.455549 | -0.617820 |
| H | -1.482428 | -0.380390 | 2.853693  |
| H | -2.718515 | -1.638763 | 2.826261  |
| H | -1.920055 | -3.810562 | -0.624661 |
| H | -1.344029 | -3.116635 | 0.887849  |
| H | -3.092938 | -0.025962 | 3.441938  |
| H | -0.170395 | 1.126009  | 1.405673  |
| H | 0.328694  | 0.441557  | -1.523487 |
| H | -0.118875 | -1.276968 | 0.988793  |
| H | 2.372869  | 2.525596  | 0.796528  |
| H | 1.876202  | 4.195895  | 0.156187  |
| H | -2.511435 | 1.917586  | 1.923981  |
| H | -1.962253 | 1.030000  | -0.936428 |
| H | -3.713040 | 1.799455  | 0.648575  |
| H | -0.631423 | -0.969677 | -2.734852 |
| H | -2.313823 | -1.446228 | -2.447992 |
| H | -1.102324 | -2.669806 | -2.753818 |
| H | -5.028153 | -2.612389 | -0.600176 |

|   |          |           |           |
|---|----------|-----------|-----------|
| H | 4.736575 | -0.628456 | -1.230653 |
| H | 4.348572 | 0.771312  | -0.227179 |
| H | 3.587499 | -0.716491 | 1.591979  |
| H | 4.042901 | -3.159256 | 1.494556  |
| H | 2.881071 | -2.694877 | 0.254765  |
| H | 4.563198 | -3.001824 | -0.185009 |
| H | 5.834403 | -1.537871 | 2.262077  |
| H | 5.938182 | 0.076524  | 1.555006  |
| H | 6.411020 | -1.336907 | 0.606942  |

CAM-B3LYP energy = -1154.92727282 a.u.

(2S,6R,7S,8S)-1, Conf. H

|   |           |           |           |
|---|-----------|-----------|-----------|
| C | -2.703739 | -2.777799 | -0.064480 |
| C | -3.111966 | -1.340330 | -0.151244 |
| C | -3.105941 | -0.433241 | 0.821697  |
| C | -2.962307 | -0.730468 | 2.285868  |
| C | -0.372371 | -1.905886 | -0.391864 |
| C | -1.356015 | -2.973810 | -0.797914 |
| C | -1.994434 | 1.458344  | -0.427449 |
| C | -0.573262 | 1.261012  | 0.162286  |
| C | 0.349145  | 0.506152  | -0.819945 |
| C | -0.226101 | -0.839019 | -1.173299 |
| O | -2.120086 | 2.879427  | -0.704785 |
| C | -1.104714 | 3.592836  | -0.195536 |
| C | -0.130410 | 2.669437  | 0.437001  |
| O | -1.063230 | 4.792301  | -0.278756 |
| C | 0.906090  | 3.115146  | 1.126551  |
| C | -3.159467 | 1.042341  | 0.470201  |
| C | 0.251185  | -2.087328 | 0.959722  |
| O | -3.631082 | -3.651870 | -0.713977 |
| O | 1.645985  | 0.440664  | -0.192825 |
| C | 2.717564  | 0.340760  | -0.995106 |
| O | 2.634423  | 0.289336  | -2.197678 |
| C | 3.999655  | 0.307390  | -0.212583 |
| C | 4.141088  | -0.924628 | 0.693039  |
| C | 4.088573  | -2.218745 | -0.112100 |
| C | 5.434408  | -0.828591 | 1.494526  |
| H | -2.591447 | -3.087425 | 0.975651  |
| H | -3.261419 | -0.998930 | -1.172925 |
| H | -2.963795 | -1.793569 | 2.512945  |
| H | -2.046762 | -0.294383 | 2.693550  |
| H | -1.560167 | -2.915344 | -1.867874 |
| H | -0.986257 | -3.977371 | -0.578478 |
| H | -3.789990 | -0.269757 | 2.830894  |
| H | -0.621658 | 0.681596  | 1.081742  |
| H | 0.456454  | 1.092047  | -1.732034 |
| H | -0.721542 | -0.854954 | -2.137496 |
| H | 1.602587  | 2.443866  | 1.608343  |
| H | 1.074322  | 4.180510  | 1.221439  |
| H | -3.133292 | 1.645534  | 1.379887  |
| H | -2.088308 | 0.970085  | -1.393108 |
| H | -4.086630 | 1.291653  | -0.049243 |
| H | 0.903196  | -2.964761 | 0.944414  |
| H | -0.510470 | -2.283562 | 1.716598  |
| H | 0.844645  | -1.234551 | 1.273425  |
| H | -4.478566 | -3.580183 | -0.261858 |

|   |          |           |           |
|---|----------|-----------|-----------|
| H | 4.818458 | 0.340083  | -0.931248 |
| H | 4.045758 | 1.212514  | 0.396569  |
| H | 3.303787 | -0.919793 | 1.394766  |
| H | 4.181880 | -3.084547 | 0.544905  |
| H | 3.150966 | -2.320383 | -0.661647 |
| H | 4.906396 | -2.256894 | -0.835891 |
| H | 5.536564 | -1.682150 | 2.166204  |
| H | 5.462835 | 0.080502  | 2.097502  |
| H | 6.302488 | -0.820130 | 0.830914  |

CAM-B3LYP energy = -1154.92726565 a.u.

(2S,6R,7S,8S)-1, Conf. I

|   |           |           |           |
|---|-----------|-----------|-----------|
| C | -3.308200 | -2.388996 | 0.247380  |
| C | -3.384846 | -0.896416 | 0.339745  |
| C | -2.951727 | -0.112793 | 1.318789  |
| C | -2.518928 | -0.598474 | 2.668882  |
| C | -1.019812 | -1.849953 | -0.765065 |
| C | -1.844245 | -2.867157 | -0.020281 |
| C | -1.716757 | 1.617768  | -0.038621 |
| C | -0.230150 | 1.393720  | 0.350014  |
| C | 0.402386  | 0.238243  | -0.453537 |
| C | -0.228596 | -1.052887 | -0.052550 |
| O | -1.825307 | 3.006914  | -0.451748 |
| C | -0.655395 | 3.656087  | -0.407201 |
| C | 0.392214  | 2.742768  | 0.110436  |
| O | -0.551960 | 4.807902  | -0.740541 |
| C | 1.621910  | 3.172549  | 0.339651  |
| C | -2.771668 | 1.367648  | 1.038629  |
| C | -1.277402 | -1.724025 | -2.235037 |
| O | -4.188096 | -2.766707 | -0.813605 |
| O | 1.805401  | 0.227282  | -0.099103 |
| C | 2.672085  | -0.290162 | -0.981474 |
| O | 2.340640  | -0.705210 | -2.065205 |
| C | 4.078599  | -0.273625 | -0.452016 |
| C | 4.270385  | -1.104354 | 0.824645  |
| C | 3.917352  | -2.569886 | 0.593459  |
| C | 5.702074  | -0.956190 | 1.327154  |
| H | -3.642023 | -2.866099 | 1.172644  |
| H | -3.682005 | -0.434602 | -0.597838 |
| H | -1.457553 | -0.401054 | 2.840568  |
| H | -2.689086 | -1.664577 | 2.806929  |
| H | -1.894868 | -3.818305 | -0.556105 |
| H | -1.380965 | -3.064725 | 0.946822  |
| H | -3.063277 | -0.063533 | 3.450902  |
| H | -0.155768 | 1.139870  | 1.408276  |
| H | 0.320538  | 0.434667  | -1.519933 |
| H | -0.119120 | -1.262812 | 1.007557  |
| H | 2.386366  | 2.531283  | 0.751999  |
| H | 1.880103  | 4.199506  | 0.113678  |
| H | -2.493831 | 1.906085  | 1.946689  |
| H | -1.966437 | 1.034282  | -0.922413 |
| H | -3.704977 | 1.803974  | 0.678841  |
| H | -0.628386 | -0.997714 | -2.718457 |
| H | -2.317352 | -1.448581 | -2.423542 |
| H | -1.122596 | -2.691256 | -2.718491 |
| H | -4.185250 | -3.726841 | -0.886451 |

|   |          |           |           |
|---|----------|-----------|-----------|
| H | 4.728446 | -0.644110 | -1.244850 |
| H | 4.348285 | 0.766043  | -0.252918 |
| H | 3.596916 | -0.703108 | 1.585623  |
| H | 4.049746 | -3.146919 | 1.509742  |
| H | 2.881569 | -2.694024 | 0.271695  |
| H | 4.561060 | -3.006615 | -0.174114 |
| H | 5.847563 | -1.519095 | 2.250260  |
| H | 5.947639 | 0.088219  | 1.526769  |
| H | 6.414170 | -1.334612 | 0.589735  |

CAM-B3LYP energy = -1154.92716303 a.u.

(2S,6R,7S,8S)-1, Conf. J

|   |           |           |           |
|---|-----------|-----------|-----------|
| C | -3.544440 | -2.216585 | -0.095899 |
| C | -3.561632 | -0.729489 | -0.273263 |
| C | -3.395715 | 0.202431  | 0.660221  |
| C | -3.440738 | -0.037044 | 2.141081  |
| C | -1.037894 | -1.993353 | -0.212538 |
| C | -2.227791 | -2.787000 | -0.690665 |
| C | -1.734769 | 1.677728  | -0.535361 |
| C | -0.468856 | 1.178843  | 0.208160  |
| C | 0.316189  | 0.138558  | -0.621657 |
| C | -0.558201 | -1.028463 | -0.992920 |
| O | -1.475510 | 3.064015  | -0.886448 |
| C | -0.356191 | 3.536935  | -0.318576 |
| C | 0.296375  | 2.448638  | 0.450970  |
| O | -0.004254 | 4.678995  | -0.457249 |
| C | 1.354095  | 2.670776  | 1.212780  |
| C | -3.044495 | 1.620713  | 0.249921  |
| C | -0.598270 | -2.285110 | 1.191609  |
| O | -4.671723 | -2.865161 | -0.684899 |
| O | 1.460935  | -0.220927 | 0.175945  |
| C | 2.531479  | -0.721711 | -0.460807 |
| O | 2.586525  | -0.843160 | -1.658765 |
| C | 3.601759  | -1.133866 | 0.511974  |
| C | 5.008922  | -1.172766 | -0.078333 |
| C | 5.507528  | 0.228026  | -0.419897 |
| C | 5.961133  | -1.870258 | 0.887662  |
| H | -3.601607 | -2.480880 | 0.957063  |
| H | -3.537917 | -0.415613 | -1.315676 |
| H | -2.476992 | 0.177173  | 2.610067  |
| H | -3.731787 | -1.050466 | 2.405760  |
| H | -2.302210 | -2.730683 | -1.779167 |
| H | -2.156299 | -3.840623 | -0.414013 |
| H | -4.161427 | 0.647077  | 2.595847  |
| H | -0.743179 | 0.706808  | 1.149507  |
| H | 0.682941  | 0.608410  | -1.533915 |
| H | -0.963311 | -0.953442 | -1.996055 |
| H | 1.814592  | 1.884229  | 1.793231  |
| H | 1.781152  | 3.664155  | 1.268059  |
| H | -2.951829 | 2.255479  | 1.133251  |
| H | -1.859290 | 1.162320  | -1.483276 |
| H | -3.826709 | 2.056541  | -0.374301 |
| H | -0.216131 | -3.307877 | 1.247393  |
| H | -1.442927 | -2.235337 | 1.881600  |
| H | 0.179197  | -1.614796 | 1.543657  |
| H | -4.687321 | -2.664663 | -1.627926 |

|   |          |           |           |
|---|----------|-----------|-----------|
| H | 3.559649 | -0.476625 | 1.382383  |
| H | 3.313794 | -2.128991 | 0.865808  |
| H | 4.965023 | -1.756502 | -1.000803 |
| H | 6.501526 | 0.186364  | -0.867772 |
| H | 4.845818 | 0.730993  | -1.125982 |
| H | 5.573371 | 0.843522  | 0.481056  |
| H | 6.967971 | -1.919758 | 0.470540  |
| H | 5.635179 | -2.889456 | 1.102591  |
| H | 6.020021 | -1.329473 | 1.835628  |

CAM-B3LYP energy = -1154.92704207 a.u.

(2S,6R,7S,8S)-1, Conf. K

|   |           |           |           |
|---|-----------|-----------|-----------|
| C | -2.908334 | -2.752580 | -0.036262 |
| C | -3.265288 | -1.311703 | -0.235098 |
| C | -3.308950 | -0.350931 | 0.682756  |
| C | -3.283402 | -0.569448 | 2.167386  |
| C | -0.519937 | -1.963537 | -0.195221 |
| C | -1.501416 | -3.019164 | -0.638740 |
| C | -2.044692 | 1.450530  | -0.555301 |
| C | -0.690832 | 1.254043  | 0.175379  |
| C | 0.299833  | 0.413460  | -0.660148 |
| C | -0.287698 | -0.929576 | -0.999543 |
| O | -2.110620 | 2.858092  | -0.910535 |
| C | -1.124255 | 3.574776  | -0.351625 |
| C | -0.232036 | 2.665090  | 0.409162  |
| O | -1.044092 | 4.766976  | -0.491685 |
| C | 0.757104  | 3.125694  | 1.156210  |
| C | -3.297302 | 1.103361  | 0.248714  |
| C | -0.003646 | -2.117417 | 1.204603  |
| O | -3.863287 | -3.649851 | -0.603535 |
| O | 1.510558  | 0.339225  | 0.117496  |
| C | 2.659339  | 0.113061  | -0.538019 |
| O | 2.714110  | -0.049936 | -1.731270 |
| C | 3.837715  | 0.135721  | 0.396451  |
| C | 5.031923  | -0.687470 | -0.080948 |
| C | 6.252185  | -0.385610 | 0.782589  |
| C | 4.715084  | -2.179908 | -0.076458 |
| H | -2.896345 | -3.005110 | 1.021004  |
| H | -3.323329 | -1.018951 | -1.282024 |
| H | -2.385707 | -0.139724 | 2.619255  |
| H | -3.338948 | -1.617582 | 2.450862  |
| H | -1.598667 | -3.004797 | -1.726707 |
| H | -1.187279 | -4.022291 | -0.343996 |
| H | -4.132628 | -0.054460 | 2.623117  |
| H | -0.843101 | 0.733066  | 1.118462  |
| H | 0.532068  | 0.941408  | -1.584825 |
| H | -0.713285 | -0.969523 | -1.996034 |
| H | 1.394409  | 2.468044  | 1.729739  |
| H | 0.945365  | 4.190819  | 1.205037  |
| H | -3.342190 | 1.756125  | 1.122645  |
| H | -2.060513 | 0.917343  | -1.501398 |
| H | -4.166412 | 1.338724  | -0.368329 |
| H | 0.622907  | -3.011420 | 1.264468  |
| H | -0.825239 | -2.270847 | 1.906847  |
| H | 0.586874  | -1.270095 | 1.538017  |
| H | -3.929278 | -3.474952 | -1.549586 |

|   |          |           |           |
|---|----------|-----------|-----------|
| H | 4.121778 | 1.188174  | 0.494361  |
| H | 3.509852 | -0.187629 | 1.385859  |
| H | 5.252631 | -0.385545 | -1.107371 |
| H | 7.118224 | -0.954660 | 0.441591  |
| H | 6.511210 | 0.674130  | 0.749781  |
| H | 6.067145 | -0.653957 | 1.825765  |
| H | 5.564260 | -2.756905 | -0.445722 |
| H | 3.856305 | -2.412505 | -0.707423 |
| H | 4.494173 | -2.523302 | 0.937503  |

CAM-B3LYP energy = -1154.92703326 a.u.

(2S,6R,7S,8S)-1, Conf. L

|   |           |           |           |
|---|-----------|-----------|-----------|
| C | -3.564047 | -2.193597 | -0.097646 |
| C | -3.576909 | -0.710647 | -0.271717 |
| C | -3.389980 | 0.215380  | 0.663447  |
| C | -3.420453 | -0.026495 | 2.144411  |
| C | -1.052650 | -1.989140 | -0.217280 |
| C | -2.250686 | -2.766938 | -0.699866 |
| C | -1.725242 | 1.685535  | -0.533361 |
| C | -0.460199 | 1.180749  | 0.207688  |
| C | 0.316420  | 0.134962  | -0.622771 |
| C | -0.568399 | -1.023810 | -0.994338 |
| O | -1.461033 | 3.071423  | -0.882948 |
| C | -0.337372 | 3.538326  | -0.319054 |
| C | 0.312600  | 2.446426  | 0.447661  |
| O | 0.019824  | 4.678730  | -0.458269 |
| C | 1.374204  | 2.663106  | 1.205623  |
| C | -3.034212 | 1.632456  | 0.253064  |
| C | -0.609260 | -2.294146 | 1.182797  |
| O | -4.694755 | -2.743427 | -0.776305 |
| O | 1.458576  | -0.233962 | 0.174216  |
| C | 2.527352  | -0.737091 | -0.463539 |
| O | 2.582428  | -0.855636 | -1.661809 |
| C | 3.596369  | -1.155715 | 0.507919  |
| C | 5.005348  | -1.180800 | -0.079038 |
| C | 5.496941  | 0.226262  | -0.404697 |
| C | 5.958962  | -1.882971 | 0.882118  |
| H | -3.617070 | -2.460146 | 0.958878  |
| H | -3.569607 | -0.400338 | -1.314014 |
| H | -2.449342 | 0.176024  | 2.603204  |
| H | -3.719219 | -1.037359 | 2.410058  |
| H | -2.337350 | -2.697475 | -1.785058 |
| H | -2.179087 | -3.824945 | -0.433385 |
| H | -4.128266 | 0.664880  | 2.608342  |
| H | -0.734651 | 0.710999  | 1.150122  |
| H | 0.686570  | 0.602247  | -1.534941 |
| H | -0.978261 | -0.940343 | -1.994771 |
| H | 1.832794  | 1.874269  | 1.784473  |
| H | 1.806514  | 3.654294  | 1.259341  |
| H | -2.938886 | 2.267145  | 1.136161  |
| H | -1.853515 | 1.171815  | -1.481672 |
| H | -3.815456 | 2.070174  | -0.370991 |
| H | -0.232778 | -3.319520 | 1.229562  |
| H | -1.451153 | -2.244641 | 1.876091  |
| H | 0.173471  | -1.630907 | 1.536723  |
| H | -4.657414 | -3.703841 | -0.706154 |

|   |          |           |           |
|---|----------|-----------|-----------|
| H | 3.548868 | -0.509016 | 1.385836  |
| H | 3.312436 | -2.156519 | 0.848724  |
| H | 4.967034 | -1.755120 | -1.007633 |
| H | 6.492079 | 0.194800  | -0.850851 |
| H | 4.834050 | 0.733156  | -1.106910 |
| H | 5.557487 | 0.832645  | 0.502780  |
| H | 6.967019 | -1.922883 | 0.466920  |
| H | 5.637937 | -2.906012 | 1.085921  |
| H | 6.012742 | -1.351507 | 1.835639  |

CAM-B3LYP energy = -1154.92699682 a.u.

(2S,6R,7S,8S)-1, Conf. M

|   |           |           |           |
|---|-----------|-----------|-----------|
| C | -2.924917 | -2.739452 | -0.038793 |
| C | -3.278894 | -1.302436 | -0.237571 |
| C | -3.309739 | -0.342111 | 0.681089  |
| C | -3.278473 | -0.558815 | 2.166008  |
| C | -0.530577 | -1.962067 | -0.199081 |
| C | -1.519805 | -3.007745 | -0.647665 |
| C | -2.040190 | 1.456186  | -0.556843 |
| C | -0.687099 | 1.256293  | 0.174404  |
| C | 0.301031  | 0.412031  | -0.660099 |
| C | -0.293654 | -0.927318 | -1.001073 |
| O | -2.102387 | 2.864148  | -0.911693 |
| C | -1.114218 | 3.578109  | -0.352717 |
| C | -0.224275 | 2.665983  | 0.407914  |
| O | -1.030995 | 4.770193  | -0.492261 |
| C | 0.766355  | 3.123858  | 1.154673  |
| C | -3.294026 | 1.111874  | 0.246173  |
| C | -0.012374 | -2.123600 | 1.199172  |
| O | -3.905320 | -3.546531 | -0.694124 |
| O | 1.510062  | 0.331707  | 0.119469  |
| C | 2.659563  | 0.103713  | -0.534322 |
| O | 2.716291  | -0.057153 | -1.727719 |
| C | 3.835727  | 0.121807  | 0.403074  |
| C | 5.035208  | -0.690425 | -0.079449 |
| C | 6.251996  | -0.390273 | 0.789624  |
| C | 4.726592  | -2.184554 | -0.089862 |
| H | -2.907489 | -2.990529 | 1.022615  |
| H | -3.346238 | -1.017301 | -1.284747 |
| H | -2.374611 | -0.137198 | 2.613207  |
| H | -3.342074 | -1.606157 | 2.450555  |
| H | -1.630533 | -2.985408 | -1.732658 |
| H | -1.202117 | -4.013878 | -0.360886 |
| H | -4.120500 | -0.035048 | 2.625078  |
| H | -0.841026 | 0.735998  | 1.117573  |
| H | 0.537217  | 0.939370  | -1.584122 |
| H | -0.721917 | -0.962453 | -1.996525 |
| H | 1.401958  | 2.464456  | 1.728100  |
| H | 0.957621  | 4.188453  | 1.203401  |
| H | -3.338647 | 1.765376  | 1.119573  |
| H | -2.057233 | 0.922996  | -1.502882 |
| H | -4.161864 | 1.348230  | -0.372242 |
| H | 0.607020  | -3.022857 | 1.255709  |
| H | -0.833807 | -2.271890 | 1.902637  |
| H | 0.585769  | -1.281839 | 1.533120  |
| H | -3.648434 | -4.471475 | -0.609017 |

|   |          |           |           |
|---|----------|-----------|-----------|
| H | 4.114149 | 1.174571  | 0.513271  |
| H | 3.506598 | -0.213397 | 1.388188  |
| H | 5.256549 | -0.377625 | -1.102483 |
| H | 7.121800 | -0.951479 | 0.445239  |
| H | 6.505469 | 0.671083  | 0.767439  |
| H | 6.066083 | -0.669443 | 1.829806  |
| H | 5.579544 | -2.753267 | -0.463242 |
| H | 3.870119 | -2.415681 | -0.724430 |
| H | 4.506020 | -2.538855 | 0.920420  |

CAM-B3LYP energy = -1154.92697350 a.u.

(2S,6R,7S,8S)-1, Conf. N

|   |           |           |           |
|---|-----------|-----------|-----------|
| C | -3.793183 | -1.728638 | 0.064465  |
| C | -3.577910 | -0.257602 | -0.106437 |
| C | -3.185560 | 0.618162  | 0.814568  |
| C | -3.151456 | 0.366809  | 2.293989  |
| C | -1.310556 | -1.920478 | -0.270185 |
| C | -2.652848 | -2.499634 | -0.640494 |
| C | -1.400190 | 1.806068  | -0.512970 |
| C | -0.183991 | 1.081041  | 0.121946  |
| C | 0.342873  | -0.043071 | -0.797205 |
| C | -0.745888 | -1.040748 | -1.092968 |
| O | -0.931086 | 3.131839  | -0.879630 |
| C | 0.287678  | 3.398232  | -0.387115 |
| C | 0.792083  | 2.202782  | 0.333230  |
| O | 0.820097  | 4.465561  | -0.543582 |
| C | 1.903342  | 2.238802  | 1.048095  |
| C | -2.631204 | 1.962374  | 0.379234  |
| C | -0.801146 | -2.298907 | 1.089036  |
| O | -5.004770 | -2.180878 | -0.546616 |
| O | 1.489512  | -0.618422 | -0.138303 |
| C | 2.341222  | -1.321564 | -0.902287 |
| O | 2.208491  | -1.434097 | -2.096127 |
| C | 3.444263  | -1.946521 | -0.095560 |
| C | 4.323505  | -0.946986 | 0.666492  |
| C | 5.379523  | -1.699938 | 1.468134  |
| C | 4.967052  | 0.064902  | -0.275373 |
| H | -3.805123 | -1.998991 | 1.121370  |
| H | -3.590226 | 0.059254  | -1.146736 |
| H | -3.593941 | -0.583967 | 2.580391  |
| H | -3.698651 | 1.160461  | 2.808649  |
| H | -2.821588 | -2.412378 | -1.714738 |
| H | -2.732252 | -3.554618 | -0.370790 |
| H | -2.129570 | 0.398669  | 2.680491  |
| H | -0.464424 | 0.626738  | 1.069803  |
| H | 0.686314  | 0.391947  | -1.735466 |
| H | -1.216751 | -0.887391 | -2.057405 |
| H | 2.251676  | 1.380137  | 1.603372  |
| H | 2.489126  | 3.148184  | 1.093666  |
| H | -2.358125 | 2.557309  | 1.252982  |
| H | -1.688763 | 1.338266  | -1.449507 |
| H | -3.375397 | 2.536080  | -0.176194 |
| H | -0.587403 | -3.370907 | 1.110448  |
| H | -1.561194 | -2.122276 | 1.852700  |
| H | 0.104520  | -1.770217 | 1.369053  |
| H | -5.743258 | -1.742584 | -0.110294 |

|   |          |           |           |
|---|----------|-----------|-----------|
| H | 2.982650 | -2.638193 | 0.613174  |
| H | 4.052747 | -2.530290 | -0.786288 |
| H | 3.683801 | -0.408837 | 1.369154  |
| H | 5.994592 | -1.006578 | 2.043452  |
| H | 4.923172 | -2.404906 | 2.164936  |
| H | 6.041297 | -2.262142 | 0.804790  |
| H | 5.589088 | 0.767388  | 0.280982  |
| H | 4.221523 | 0.645846  | -0.821497 |
| H | 5.602561 | -0.438550 | -1.008002 |

CAM-B3LYP energy = -1154.92675554 a.u.

(2S,6R,7S,8S)-1, Conf. O

|   |           |           |           |
|---|-----------|-----------|-----------|
| C | -2.712276 | -2.779001 | -0.054367 |
| C | -3.116757 | -1.339372 | -0.141249 |
| C | -3.105125 | -0.430397 | 0.829073  |
| C | -2.955063 | -0.726643 | 2.292624  |
| C | -0.374963 | -1.905722 | -0.390683 |
| C | -1.359271 | -2.974459 | -0.792684 |
| C | -1.994533 | 1.458700  | -0.424631 |
| C | -0.572560 | 1.261009  | 0.162695  |
| C | 0.347872  | 0.505321  | -0.820806 |
| C | -0.227739 | -0.839856 | -1.173527 |
| O | -2.119460 | 2.879466  | -0.703880 |
| C | -1.102874 | 3.592753  | -0.196809 |
| C | -0.128472 | 2.669357  | 0.435610  |
| O | -1.060531 | 4.792052  | -0.281725 |
| C | 0.909017  | 3.115102  | 1.123636  |
| C | -3.158242 | 1.044831  | 0.475698  |
| C | 0.247211  | -2.085280 | 0.961853  |
| O | -3.693828 | -3.671165 | -0.582499 |
| O | 1.645560  | 0.439276  | -0.195390 |
| C | 2.716043  | 0.338505  | -0.999028 |
| O | 2.631228  | 0.286496  | -2.201470 |
| C | 3.999150  | 0.305243  | -0.218214 |
| C | 4.139322  | -0.923498 | 0.691992  |
| C | 4.083546  | -2.220514 | -0.108219 |
| C | 5.433710  | -0.826803 | 1.491694  |
| H | -2.599339 | -3.086386 | 0.982181  |
| H | -3.268386 | -0.992043 | -1.161779 |
| H | -2.040540 | -0.286148 | 2.697789  |
| H | -2.952114 | -1.789717 | 2.519948  |
| H | -1.554181 | -2.917702 | -1.866034 |
| H | -0.990527 | -3.977987 | -0.571893 |
| H | -3.783540 | -0.270243 | 2.840048  |
| H | -0.619574 | 0.682287  | 1.082609  |
| H | 0.454210  | 1.091018  | -1.733105 |
| H | -0.721542 | -0.856885 | -2.138622 |
| H | 1.605589  | 2.443875  | 1.605401  |
| H | 1.077985  | 4.180454  | 1.217297  |
| H | -3.129833 | 1.649129  | 1.384547  |
| H | -2.090470 | 0.969304  | -1.389559 |
| H | -4.086255 | 1.294348  | -0.042107 |
| H | 0.900143  | -2.962021 | 0.948160  |
| H | -0.514584 | -2.281117 | 1.718645  |
| H | 0.839620  | -1.231630 | 1.275109  |
| H | -3.848294 | -3.449695 | -1.508228 |

|   |          |           |           |
|---|----------|-----------|-----------|
| H | 4.817009 | 0.333594  | -0.938125 |
| H | 4.047940 | 1.212683  | 0.387307  |
| H | 3.302790 | -0.914440 | 1.394571  |
| H | 4.175873 | -3.084040 | 0.551912  |
| H | 3.145155 | -2.322430 | -0.656406 |
| H | 4.900535 | -2.262956 | -0.832713 |
| H | 5.535016 | -1.677940 | 2.166564  |
| H | 5.464484 | 0.084545  | 2.091137  |
| H | 6.301082 | -0.822514 | 0.827118  |

CAM-B3LYP energy = -1154.92648280 a.u.

(2S,6R,7S,8S)-1, Conf. P

|   |           |           |           |
|---|-----------|-----------|-----------|
| C | -2.723549 | -2.768970 | -0.056912 |
| C | -3.126018 | -1.333518 | -0.143378 |
| C | -3.104707 | -0.425320 | 0.827263  |
| C | -2.950386 | -0.720238 | 2.290748  |
| C | -0.381160 | -1.903882 | -0.394779 |
| C | -1.372475 | -2.963988 | -0.801209 |
| C | -1.991403 | 1.462984  | -0.425815 |
| C | -0.569964 | 1.263442  | 0.162148  |
| C | 0.349260  | 0.506135  | -0.820964 |
| C | -0.231407 | -0.836395 | -1.175001 |
| O | -2.114542 | 2.884202  | -0.704200 |
| C | -1.097234 | 3.595948  | -0.196668 |
| C | -0.123980 | 2.671068  | 0.435421  |
| O | -1.053351 | 4.795281  | -0.280850 |
| C | 0.914106  | 3.115122  | 1.123648  |
| C | -3.155887 | 1.049883  | 0.473495  |
| C | 0.243909  | -2.090745 | 0.955401  |
| O | -3.739852 | -3.566916 | -0.666909 |
| O | 1.646183  | 0.435781  | -0.194511 |
| C | 2.717373  | 0.335705  | -0.997309 |
| O | 2.633781  | 0.285892  | -2.199922 |
| C | 3.999754  | 0.300455  | -0.215348 |
| C | 4.138615  | -0.929746 | 0.693044  |
| C | 4.082787  | -2.225465 | -0.109256 |
| C | 5.432463  | -0.834909 | 1.493845  |
| H | -2.605224 | -3.075836 | 0.983131  |
| H | -3.284910 | -0.993521 | -1.163887 |
| H | -2.031222 | -0.285507 | 2.691650  |
| H | -2.953321 | -1.783056 | 2.519111  |
| H | -1.581287 | -2.898781 | -1.869863 |
| H | -0.999784 | -3.969871 | -0.589683 |
| H | -3.773425 | -0.257152 | 2.840764  |
| H | -0.618056 | 0.684616  | 1.081952  |
| H | 0.458117  | 1.092155  | -1.732762 |
| H | -0.728506 | -0.849028 | -2.138391 |
| H | 1.609668  | 2.442703  | 1.605221  |
| H | 1.084618  | 4.180188  | 1.217749  |
| H | -3.128000 | 1.654424  | 1.382206  |
| H | -2.087755 | 0.974032  | -1.390899 |
| H | -4.083189 | 1.299611  | -0.045438 |
| H | -0.517112 | -2.283973 | 1.713615  |
| H | 0.842174  | -1.241281 | 1.268991  |
| H | 0.891712  | -2.971277 | 0.937782  |
| H | -3.456871 | -4.488032 | -0.652753 |

|   |          |           |           |
|---|----------|-----------|-----------|
| H | 4.818275 | 0.329556  | -0.934479 |
| H | 4.048472 | 1.206912  | 0.391645  |
| H | 3.301582 | -0.921375 | 1.395046  |
| H | 4.174392 | -3.090082 | 0.549552  |
| H | 3.144676 | -2.326074 | -0.658159 |
| H | 4.900187 | -2.267067 | -0.833335 |
| H | 5.532917 | -1.687151 | 2.167451  |
| H | 5.463203 | 0.075482  | 2.094746  |
| H | 6.300323 | -0.829939 | 0.829911  |

CAM-B3LYP energy = -1154.92640253 a.u.

(2S,6R,7S,8S)-1, Conf. Q

|   |           |           |           |
|---|-----------|-----------|-----------|
| C | -4.043370 | -1.552328 | 0.306162  |
| C | -3.674859 | -0.100170 | 0.218317  |
| C | -3.116956 | 0.662164  | 1.150917  |
| C | -2.968817 | 0.274145  | 2.590725  |
| C | -1.643994 | -1.820954 | -0.542993 |
| C | -2.788332 | -2.466757 | 0.196563  |
| C | -1.313834 | 1.750514  | -0.235896 |
| C | -0.000873 | 1.161616  | 0.350498  |
| C | 0.317737  | -0.217235 | -0.264440 |
| C | -0.711691 | -1.204481 | 0.177333  |
| O | -0.963208 | 3.036606  | -0.813487 |
| C | 0.336982  | 3.327767  | -0.684041 |
| C | 1.009698  | 2.238831  | 0.064931  |
| O | 0.810174  | 4.343656  | -1.122553 |
| C | 2.277472  | 2.339673  | 0.426002  |
| C | -2.475918 | 1.972148  | 0.731657  |
| C | -1.732654 | -1.806538 | -2.037892 |
| O | -4.922903 | -1.911937 | -0.764146 |
| O | 1.613120  | -0.617108 | 0.249498  |
| C | 2.291045  | -1.538471 | -0.453596 |
| O | 1.925059  | -1.940526 | -1.530987 |
| C | 3.523476  | -2.015943 | 0.263725  |
| C | 4.527281  | -0.919282 | 0.636580  |
| C | 5.699268  | -1.532144 | 1.395757  |
| C | 5.008780  | -0.158934 | -0.594263 |
| H | -4.533532 | -1.781758 | 1.255641  |
| H | -3.725733 | 0.286394  | -0.796648 |
| H | -3.380597 | 1.055995  | 3.233403  |
| H | -1.915765 | 0.170727  | 2.865682  |
| H | -3.108823 | -3.395023 | -0.279206 |
| H | -2.465527 | -2.707925 | 1.209169  |
| H | -3.471117 | -0.661299 | 2.829224  |
| H | -0.100036 | 1.029107  | 1.428535  |
| H | 0.389549  | -0.136600 | -1.346318 |
| H | -0.757658 | -1.305522 | 1.258098  |
| H | 2.768485  | 1.576389  | 1.009726  |
| H | 2.849732  | 3.212613  | 0.138355  |
| H | -2.120168 | 2.527873  | 1.601109  |
| H | -1.657551 | 1.145222  | -1.071736 |
| H | -3.202358 | 2.605717  | 0.219905  |
| H | -2.626604 | -1.272935 | -2.368869 |
| H | -1.829998 | -2.829319 | -2.408677 |
| H | -0.861856 | -1.357705 | -2.509876 |
| H | -5.704625 | -1.350604 | -0.716052 |

|   |          |           |           |
|---|----------|-----------|-----------|
| H | 3.191883 | -2.527723 | 1.170688  |
| H | 3.998522 | -2.755461 | -0.381074 |
| H | 4.023055 | -0.218780 | 1.305936  |
| H | 6.408465 | -0.760665 | 1.698898  |
| H | 5.363043 | -2.053488 | 2.293480  |
| H | 6.234270 | -2.250081 | 0.769373  |
| H | 5.716473 | 0.622037  | -0.312855 |
| H | 4.184953 | 0.318594  | -1.127825 |
| H | 5.512940 | -0.833030 | -1.290961 |

CAM-B3LYP energy = -1154.92637423 a.u.

(2S,6R,7S,8S)-1, Conf. R

|   |           |           |           |
|---|-----------|-----------|-----------|
| C | -4.063590 | -1.532662 | 0.281810  |
| C | -3.691744 | -0.083934 | 0.213765  |
| C | -3.119379 | 0.660262  | 1.151169  |
| C | -2.965062 | 0.253646  | 2.585317  |
| C | -1.647516 | -1.817630 | -0.516552 |
| C | -2.796021 | -2.445662 | 0.229205  |
| C | -1.312838 | 1.754923  | -0.225949 |
| C | 0.003230  | 1.167132  | 0.355229  |
| C | 0.316902  | -0.215021 | -0.254623 |
| C | -0.712718 | -1.197140 | 0.197316  |
| O | -0.965997 | 3.043540  | -0.800708 |
| C | 0.335368  | 3.333002  | -0.681838 |
| C | 1.013356  | 2.242167  | 0.059647  |
| O | 0.806050  | 4.349215  | -1.122471 |
| C | 2.284976  | 2.340540  | 0.407691  |
| C | -2.474322 | 1.971897  | 0.743569  |
| C | -1.736187 | -1.817771 | -2.011534 |
| O | -4.932676 | -1.772073 | -0.827355 |
| O | 1.614304  | -0.614672 | 0.254949  |
| C | 2.285912  | -1.542137 | -0.446023 |
| O | 1.912814  | -1.950230 | -1.518732 |
| C | 3.521479  | -2.018092 | 0.266892  |
| C | 4.530892  | -0.921851 | 0.625482  |
| C | 5.707326  | -1.533281 | 1.378951  |
| C | 5.004719  | -0.169746 | -0.613374 |
| H | -4.595927 | -1.767287 | 1.207509  |
| H | -3.757971 | 0.316935  | -0.793990 |
| H | -1.911381 | 0.159649  | 2.860683  |
| H | -3.457375 | -0.690497 | 2.810701  |
| H | -3.089285 | -3.402193 | -0.210395 |
| H | -2.489959 | -2.642125 | 1.257148  |
| H | -3.387310 | 1.021376  | 3.238357  |
| H | -0.090178 | 1.039929  | 1.434481  |
| H | 0.383391  | -0.139682 | -1.337229 |
| H | -0.757394 | -1.288085 | 1.278822  |
| H | 2.780713  | 1.576112  | 0.985823  |
| H | 2.855612  | 3.212713  | 0.114550  |
| H | -2.117550 | 2.519894  | 1.617523  |
| H | -1.657375 | 1.151101  | -1.062690 |
| H | -3.198427 | 2.611511  | 0.236137  |
| H | -0.857903 | -1.387841 | -2.487188 |
| H | -2.621968 | -1.274047 | -2.347469 |
| H | -1.849178 | -2.842776 | -2.371798 |
| H | -5.213129 | -2.692924 | -0.803360 |



|   |          |           |           |
|---|----------|-----------|-----------|
| H | 3.194378 | -2.522507 | 1.179586  |
| H | 3.990205 | -2.763498 | -0.375761 |
| H | 4.033693 | -0.216238 | 1.294755  |
| H | 6.420566 | -0.761781 | 1.672402  |
| H | 5.376928 | -2.048996 | 2.282056  |
| H | 6.235845 | -2.255768 | 0.752297  |
| H | 5.716517 | 0.611004  | -0.341884 |
| H | 4.178033 | 0.306918  | -1.143274 |
| H | 5.501784 | -0.848993 | -1.310155 |

CAM-B3LYP energy = -1154.92627309 a.u.

(2S,6R,7S,8S)-1, Conf. S

|   |           |           |           |
|---|-----------|-----------|-----------|
| C | -4.084993 | -1.541452 | 0.237197  |
| C | -3.708048 | -0.098500 | 0.066870  |
| C | -3.226519 | 0.737753  | 0.978503  |
| C | -3.191547 | 0.462040  | 2.451076  |
| C | -1.633423 | -1.869790 | -0.412838 |
| C | -2.828030 | -2.457547 | 0.294352  |
| C | -1.320743 | 1.724436  | -0.340523 |
| C | -0.068269 | 1.169910  | 0.391233  |
| C | 0.301174  | -0.236265 | -0.127473 |
| C | -0.745652 | -1.203323 | 0.319386  |
| O | -0.907104 | 2.965040  | -0.974329 |
| C | 0.375026  | 3.269102  | -0.734866 |
| C | 0.963452  | 2.236909  | 0.152240  |
| O | 0.893586  | 4.253936  | -1.192421 |
| C | 2.177455  | 2.374842  | 0.657291  |
| C | -2.555376 | 2.016339  | 0.511246  |
| C | -1.623202 | -1.966600 | -1.907241 |
| O | -4.880653 | -1.984369 | -0.866919 |
| O | 1.576193  | -0.578611 | 0.467263  |
| C | 2.300889  | -1.531684 | -0.140189 |
| O | 1.960930  | -2.056502 | -1.172486 |
| C | 3.569235  | -1.838884 | 0.604035  |
| C | 4.669048  | -0.782022 | 0.406697  |
| C | 5.885942  | -1.152449 | 1.247466  |
| C | 5.046878  | -0.619638 | -1.061580 |
| H | -4.646925 | -1.699841 | 1.161018  |
| H | -3.680232 | 0.209066  | -0.975607 |
| H | -2.163302 | 0.390758  | 2.815342  |
| H | -3.706997 | -0.457717 | 2.720424  |
| H | -3.116596 | -3.423162 | -0.124253 |
| H | -2.579497 | -2.611788 | 1.344214  |
| H | -3.656208 | 1.286170  | 2.997707  |
| H | -0.264878 | 1.085944  | 1.460327  |
| H | 0.423562  | -0.216716 | -1.207963 |
| H | -0.861185 | -1.226419 | 1.399533  |
| H | 2.593866  | 1.654495  | 1.345324  |
| H | 2.778825  | 3.233786  | 0.387432  |
| H | -2.269261 | 2.639278  | 1.360687  |
| H | -1.602465 | 1.065527  | -1.158888 |
| H | -3.238623 | 2.604559  | -0.103745 |
| H | -1.698532 | -3.014725 | -2.205604 |
| H | -0.720367 | -1.554177 | -2.351213 |
| H | -2.491497 | -1.461471 | -2.336191 |
| H | -5.660871 | -1.421763 | -0.923458 |

|   |          |           |           |
|---|----------|-----------|-----------|
| H | 3.337216 | -1.924157 | 1.666318  |
| H | 3.925367 | -2.806392 | 0.249357  |
| H | 4.284207 | 0.173506  | 0.770184  |
| H | 6.666370 | -0.396334 | 1.150967  |
| H | 5.628727 | -1.239264 | 2.304347  |
| H | 6.304240 | -2.108113 | 0.922346  |
| H | 5.832468 | 0.129026  | -1.172724 |
| H | 4.198975 | -0.303684 | -1.670836 |
| H | 5.420215 | -1.561410 | -1.471202 |

CAM-B3LYP energy = -1154.92626392 a.u.

(2S,6R,7S,8S)-1, Conf. T

|   |           |           |           |
|---|-----------|-----------|-----------|
| C | -4.100350 | -1.540326 | 0.206235  |
| C | -3.729728 | -0.098102 | 0.047754  |
| C | -3.242110 | 0.729108  | 0.963320  |
| C | -3.203997 | 0.443510  | 2.434022  |
| C | -1.630190 | -1.867561 | -0.381895 |
| C | -2.829733 | -2.443213 | 0.324340  |
| C | -1.331374 | 1.725245  | -0.341870 |
| C | -0.077109 | 1.183387  | 0.396421  |
| C | 0.299010  | -0.227303 | -0.104730 |
| C | -0.747204 | -1.191859 | 0.347810  |
| O | -0.924813 | 2.967021  | -0.978353 |
| C | 0.356443  | 3.277295  | -0.743037 |
| C | 0.951563  | 2.251023  | 0.146532  |
| O | 0.869924  | 4.262515  | -1.205622 |
| C | 2.168551  | 2.393754  | 0.643284  |
| C | -2.572812 | 2.010911  | 0.502321  |
| C | -1.609635 | -1.981490 | -1.875078 |
| O | -4.882132 | -1.877942 | -0.941594 |
| O | 1.572153  | -0.555317 | 0.501190  |
| C | 2.304954  | -1.514884 | -0.085707 |
| O | 1.968214  | -2.067160 | -1.104643 |
| C | 3.580232  | -1.785550 | 0.660734  |
| C | 4.694327  | -0.770617 | 0.349231  |
| C | 5.906611  | -1.063086 | 1.226682  |
| C | 5.074904  | -0.774004 | -1.127281 |
| H | -4.700155 | -1.704047 | 1.105465  |
| H | -3.715601 | 0.217627  | -0.991877 |
| H | -3.674528 | 1.260937  | 2.985793  |
| H | -2.175950 | 0.376084  | 2.799294  |
| H | -3.086577 | -3.435030 | -0.056044 |
| H | -2.602079 | -2.551784 | 1.385170  |
| H | -3.715400 | -0.480517 | 2.696787  |
| H | -0.274105 | 1.110985  | 1.466378  |
| H | 0.427097  | -0.220007 | -1.184776 |
| H | -0.868202 | -1.202689 | 1.427345  |
| H | 2.591239  | 1.677598  | 1.331925  |
| H | 2.766095  | 3.252698  | 0.364979  |
| H | -2.295306 | 2.634818  | 1.353956  |
| H | -1.604654 | 1.060779  | -1.158745 |
| H | -3.253969 | 2.596441  | -0.117472 |
| H | -2.465508 | -1.466625 | -2.316966 |
| H | -1.699291 | -3.031390 | -2.163148 |
| H | -0.696045 | -1.588622 | -2.314766 |
| H | -5.158563 | -2.797027 | -0.864095 |

|   |          |           |           |
|---|----------|-----------|-----------|
| H | 3.368801 | -1.772331 | 1.730210  |
| H | 3.912896 | -2.786748 | 0.385168  |
| H | 4.322300 | 0.224202  | 0.605931  |
| H | 6.699589 | -0.336501 | 1.044014  |
| H | 5.650132 | -1.024135 | 2.286551  |
| H | 6.307992 | -2.056718 | 1.012919  |
| H | 5.863027 | -0.044560 | -1.319181 |
| H | 4.229049 | -0.527058 | -1.769746 |
| H | 5.446822 | -1.756743 | -1.427420 |

CAM-B3LYP energy = -1154.92614292 a.u.

(2S,6R,7S,8S)-1, Conf. U

|   |           |           |           |
|---|-----------|-----------|-----------|
| C | -3.453764 | -2.172174 | 0.332974  |
| C | -3.594216 | -0.693201 | 0.148929  |
| C | -3.274370 | 0.249148  | 1.031664  |
| C | -3.051842 | 0.016389  | 2.497030  |
| C | -1.272858 | -1.843700 | -1.019330 |
| C | -2.459880 | -2.732676 | -0.705211 |
| C | -1.708716 | 1.642313  | -0.328883 |
| C | -0.380184 | 1.267271  | 0.381045  |
| C | 0.262621  | -0.001657 | -0.220410 |
| C | -0.650759 | -1.171380 | -0.055912 |
| O | -1.522471 | 2.977287  | -0.868832 |
| C | -0.316427 | 3.487554  | -0.586392 |
| C | 0.450556  | 2.511331  | 0.226188  |
| O | 0.016751  | 4.581364  | -0.961253 |
| C | 1.640791  | 2.810735  | 0.719049  |
| C | -2.974619 | 1.647207  | 0.530606  |
| C | -0.957926 | -1.715548 | -2.480348 |
| O | -4.673677 | -2.891067 | 0.114051  |
| O | 1.486558  | -0.208323 | 0.524919  |
| C | 2.482005  | -0.871401 | -0.083024 |
| O | 2.425560  | -1.236780 | -1.230939 |
| C | 3.632543  | -1.117963 | 0.854093  |
| C | 4.981085  | -1.292014 | 0.159695  |
| C | 5.443122  | 0.008011  | -0.491636 |
| C | 6.018623  | -1.802662 | 1.154052  |
| H | -3.090589 | -2.393004 | 1.337751  |
| H | -3.783005 | -0.389603 | -0.879032 |
| H | -3.309624 | -0.991173 | 2.813975  |
| H | -3.668781 | 0.713795  | 3.068677  |
| H | -3.028780 | -2.875472 | -1.626263 |
| H | -2.136175 | -3.726947 | -0.388425 |
| H | -2.017581 | 0.211629  | 2.791239  |
| H | -0.558898 | 1.073477  | 1.437859  |
| H | 0.521931  | 0.174397  | -1.261176 |
| H | -0.932126 | -1.354081 | 0.975811  |
| H | 2.193662  | 2.121227  | 1.339762  |
| H | 2.083489  | 3.774894  | 0.503184  |
| H | -2.842691 | 2.343063  | 1.361111  |
| H | -1.869412 | 0.998473  | -1.190634 |
| H | -3.789769 | 2.026564  | -0.087876 |
| H | -1.750160 | -1.169904 | -3.000982 |
| H | -0.916473 | -2.708777 | -2.933106 |
| H | -0.008073 | -1.222013 | -2.669098 |
| H | -5.317090 | -2.592980 | 0.765943  |

|   |          |           |           |
|---|----------|-----------|-----------|
| H | 3.671207 | -0.311270 | 1.588251  |
| H | 3.375055 | -2.025627 | 1.409083  |
| H | 4.855592 | -2.042918 | -0.623833 |
| H | 6.394161 | -0.134473 | -1.007012 |
| H | 4.720611 | 0.372283  | -1.222935 |
| H | 5.585672 | 0.786907  | 0.261899  |
| H | 6.983723 | -1.947193 | 0.666343  |
| H | 5.716353 | -2.755771 | 1.591534  |
| H | 6.161279 | -1.088863 | 1.969296  |

CAM-B3LYP energy = -1154.92612196 a.u.

(2S,6R,7S,8S)-1, Conf. V

|   |           |           |           |
|---|-----------|-----------|-----------|
| C | -2.821607 | -2.681629 | 0.350272  |
| C | -3.299932 | -1.269052 | 0.222719  |
| C | -3.145306 | -0.296696 | 1.117401  |
| C | -2.788540 | -0.503633 | 2.560168  |
| C | -0.849381 | -1.837349 | -1.096456 |
| C | -1.784365 | -2.979964 | -0.752616 |
| C | -2.010176 | 1.446874  | -0.268379 |
| C | -0.593628 | 1.362798  | 0.362050  |
| C | 0.282151  | 0.282849  | -0.310452 |
| C | -0.338766 | -1.064688 | -0.143126 |
| O | -2.159023 | 2.803789  | -0.763785 |
| C | -1.082150 | 3.563999  | -0.525304 |
| C | -0.070448 | 2.764641  | 0.208695  |
| O | -1.023179 | 4.713813  | -0.875248 |
| C | 1.050055  | 3.312066  | 0.649317  |
| C | -3.196889 | 1.142619  | 0.648286  |
| C | -0.656938 | -1.607940 | -2.566231 |
| O | -3.858984 | -3.652337 | 0.164951  |
| O | 1.557820  | 0.338027  | 0.372766  |
| C | 2.645937  | -0.061062 | -0.302802 |
| O | 2.607869  | -0.447484 | -1.444562 |
| C | 3.893015  | 0.084054  | 0.526498  |
| C | 5.022858  | -0.862905 | 0.128506  |
| C | 6.315235  | -0.457384 | 0.829364  |
| C | 4.665914  | -2.313762 | 0.436695  |
| H | -2.364812 | -2.837364 | 1.328697  |
| H | -3.612554 | -0.995983 | -0.783450 |
| H | -1.807719 | -0.088180 | 2.804074  |
| H | -2.796635 | -1.549662 | 2.856244  |
| H | -2.356035 | -3.231790 | -1.648257 |
| H | -1.226060 | -3.879531 | -0.482785 |
| H | -3.509357 | 0.026192  | 3.187436  |
| H | -0.665709 | 1.111800  | 1.419475  |
| H | 0.442495  | 0.535250  | -1.355551 |
| H | -0.513455 | -1.329760 | 0.894244  |
| H | 1.778808  | 2.750668  | 1.215150  |
| H | 1.252413  | 4.356043  | 0.445846  |
| H | -3.184536 | 1.832880  | 1.493602  |
| H | -2.069974 | 0.807891  | -1.146611 |
| H | -4.107938 | 1.337875  | 0.080112  |
| H | -0.411086 | -2.553630 | -3.054576 |
| H | 0.138950  | -0.901053 | -2.786179 |
| H | -1.582983 | -1.252131 | -3.026840 |
| H | -4.519057 | -3.519395 | 0.853736  |

|   |          |           |           |
|---|----------|-----------|-----------|
| H | 4.214844 | 1.123093  | 0.404143  |
| H | 3.633813 | -0.036357 | 1.579624  |
| H | 5.170424 | -0.766743 | -0.949606 |
| H | 7.135434 | -1.116083 | 0.540257  |
| H | 6.600615 | 0.565853  | 0.578709  |
| H | 6.205599 | -0.519101 | 1.915054  |
| H | 5.467537 | -2.984607 | 0.124045  |
| H | 3.754886 | -2.622659 | -0.077343 |
| H | 4.513825 | -2.453005 | 1.510130  |

CAM-B3LYP energy = -1154.92600892 a.u.

(2S,6R,7S,8S)-1, Conf. W

|   |           |           |           |
|---|-----------|-----------|-----------|
| C | -3.802188 | -1.725788 | 0.074030  |
| C | -3.583299 | -0.254066 | -0.094750 |
| C | -3.183126 | 0.620114  | 0.823474  |
| C | -3.140530 | 0.365663  | 2.301944  |
| C | -1.313256 | -1.917435 | -0.270513 |
| C | -2.656428 | -2.495939 | -0.638278 |
| C | -1.400720 | 1.806563  | -0.509079 |
| C | -0.183108 | 1.081735  | 0.123013  |
| C | 0.342251  | -0.042136 | -0.797289 |
| C | -0.746907 | -1.039089 | -1.093818 |
| O | -0.932098 | 3.131711  | -0.878493 |
| C | 0.287810  | 3.398381  | -0.388820 |
| C | 0.793373  | 2.203597  | 0.331845  |
| O | 0.820194  | 4.465338  | -0.547764 |
| C | 1.905997  | 2.240095  | 1.044552  |
| C | -2.629193 | 1.964019  | 0.386408  |
| C | -0.805516 | -2.294660 | 1.089732  |
| O | -5.068864 | -2.164192 | -0.417732 |
| O | 1.488533  | -0.618745 | -0.138815 |
| C | 2.339269  | -1.322880 | -0.902980 |
| O | 2.205992  | -1.435375 | -2.096766 |
| C | 3.441882  | -1.948788 | -0.096425 |
| C | 4.323073  | -0.949668 | 0.663965  |
| C | 5.378238  | -1.703208 | 1.466170  |
| C | 4.967776  | 0.059991  | -0.279500 |
| H | -3.812915 | -1.997410 | 1.126523  |
| H | -3.596692 | 0.069406  | -1.134224 |
| H | -2.117433 | 0.403672  | 2.684545  |
| H | -3.576685 | -0.588109 | 2.588212  |
| H | -2.817918 | -2.409691 | -1.715262 |
| H | -2.736244 | -3.551413 | -0.371062 |
| H | -3.691266 | 1.154305  | 2.820523  |
| H | -0.461245 | 0.627407  | 1.071492  |
| H | 0.685856  | 0.393293  | -1.735300 |
| H | -1.215869 | -0.886680 | -2.059404 |
| H | 2.255281  | 1.381899  | 1.599958  |
| H | 2.491973  | 3.149447  | 1.088197  |
| H | -2.353360 | 2.558883  | 1.259298  |
| H | -1.692052 | 1.337929  | -1.444379 |
| H | -3.374476 | 2.538211  | -0.167011 |
| H | -1.565828 | -2.117503 | 1.852939  |
| H | 0.099774  | -1.765595 | 1.370180  |
| H | -0.591440 | -3.366550 | 1.112204  |
| H | -5.136001 | -1.931982 | -1.351245 |

|   |          |           |           |
|---|----------|-----------|-----------|
| H | 2.979734 | -2.638977 | 0.613392  |
| H | 4.049053 | -2.534147 | -0.786961 |
| H | 3.684502 | -0.409626 | 1.366208  |
| H | 5.994560 | -1.010030 | 2.040364  |
| H | 4.921069 | -2.406556 | 2.164071  |
| H | 6.038920 | -2.267281 | 0.803330  |
| H | 5.591039 | 0.762300  | 0.275696  |
| H | 4.222921 | 0.641298  | -0.826159 |
| H | 5.602295 | -0.445391 | -1.011658 |

CAM-B3LYP energy = -1154.92596561 a.u.

(2S,6R,7S,8S)-1, Conf. X

|   |           |           |           |
|---|-----------|-----------|-----------|
| C | -3.810255 | -1.711282 | 0.069377  |
| C | -3.592044 | -0.243796 | -0.098817 |
| C | -3.181687 | 0.624616  | 0.820245  |
| C | -3.133515 | 0.368540  | 2.298411  |
| C | -1.318421 | -1.911512 | -0.271138 |
| C | -2.663503 | -2.481121 | -0.644038 |
| C | -1.396146 | 1.810348  | -0.509657 |
| C | -0.179617 | 1.084524  | 0.123485  |
| C | 0.343534  | -0.040921 | -0.795788 |
| C | -0.749127 | -1.033564 | -1.092830 |
| O | -0.926285 | 3.135662  | -0.877475 |
| C | 0.293805  | 3.400785  | -0.387766 |
| C | 0.798499  | 2.204987  | 0.331884  |
| O | 0.827226  | 4.467411  | -0.545778 |
| C | 1.911899  | 2.239598  | 1.043478  |
| C | -2.625865 | 1.967934  | 0.383747  |
| C | -0.811375 | -2.295167 | 1.087521  |
| O | -5.068564 | -2.056400 | -0.513191 |
| O | 1.487497  | -0.620929 | -0.136279 |
| C | 2.336623  | -1.327751 | -0.899762 |
| O | 2.203166  | -1.441111 | -2.093442 |
| C | 3.438129  | -1.954961 | -0.092710 |
| C | 4.323784  | -0.956093 | 0.662862  |
| C | 5.378446  | -1.710263 | 1.465130  |
| C | 4.969448  | 0.048994  | -0.284821 |
| H | -3.819176 | -1.983091 | 1.125749  |
| H | -3.616180 | 0.077272  | -1.137456 |
| H | -3.575731 | -0.582097 | 2.585629  |
| H | -3.675028 | 1.161472  | 2.820147  |
| H | -2.832053 | -2.385727 | -1.717561 |
| H | -2.739910 | -3.539896 | -0.382349 |
| H | -2.108371 | 0.397717  | 2.676270  |
| H | -0.458634 | 0.631201  | 1.072187  |
| H | 0.689263  | 0.393179  | -1.733632 |
| H | -1.218760 | -0.877324 | -2.057371 |
| H | 2.260597  | 1.380581  | 1.597991  |
| H | 2.499158  | 3.148126  | 1.087029  |
| H | -2.351431 | 2.563103  | 1.256889  |
| H | -1.686782 | 1.342336  | -1.445463 |
| H | -3.370007 | 2.541874  | -0.171422 |
| H | 0.094705  | -1.768533 | 1.370139  |
| H | -0.598623 | -3.367471 | 1.105628  |
| H | -1.571771 | -2.120137 | 1.851058  |
| H | -5.183562 | -3.011373 | -0.453088 |

|   |          |           |           |
|---|----------|-----------|-----------|
| H | 2.974875 | -2.641206 | 0.620172  |
| H | 4.042349 | -2.544512 | -0.782281 |
| H | 3.688212 | -0.412123 | 1.364814  |
| H | 5.997763 | -1.017157 | 2.036181  |
| H | 4.920735 | -2.410414 | 2.165884  |
| H | 6.036311 | -2.277962 | 0.802588  |
| H | 5.595693 | 0.751180  | 0.267160  |
| H | 4.225178 | 0.630784  | -0.831752 |
| H | 5.601189 | -0.460230 | -1.016720 |

CAM-B3LYP energy = -1154.92589601 a.u.

|   |          |           |           |
|---|----------|-----------|-----------|
| H | 3.813135 | -0.298104 | 1.485917  |
| H | 3.535917 | -2.024820 | 1.406899  |
| H | 4.830690 | -2.109073 | -0.744945 |
| H | 6.287893 | -0.193541 | -1.349894 |
| H | 4.591795 | 0.275838  | -1.431060 |
| H | 5.580263 | 0.769142  | -0.051380 |
| H | 7.063415 | -1.921415 | 0.343414  |
| H | 5.899484 | -2.707542 | 1.412856  |
| H | 6.343265 | -1.018501 | 1.676453  |

CAM-B3LYP energy = -1154.92580550 a.u.

(2S,6R,7S,8S)-1, Conf. Y

|   |           |           |           |
|---|-----------|-----------|-----------|
| C | -3.865659 | -2.015342 | 0.131854  |
| C | -3.712289 | -0.527043 | 0.007840  |
| C | -3.356154 | 0.338080  | 0.949360  |
| C | -3.280693 | 0.017767  | 2.411478  |
| C | -1.362495 | -1.939724 | -0.457724 |
| C | -2.471817 | -2.728364 | 0.189295  |
| C | -1.606182 | 1.661932  | -0.293993 |
| C | -0.292415 | 1.288677  | 0.445672  |
| C | 0.289114  | -0.044087 | -0.070983 |
| C | -0.611946 | -1.166909 | 0.321763  |
| O | -1.389976 | 2.977366  | -0.871052 |
| C | -0.164062 | 3.457763  | -0.626771 |
| C | 0.582103  | 2.490989  | 0.214670  |
| O | 0.198340  | 4.524638  | -1.049341 |
| C | 1.789106  | 2.773845  | 0.675695  |
| C | -2.889077 | 1.720599  | 0.534516  |
| C | -1.285134 | -1.975019 | -1.954833 |
| O | -4.689720 | -2.536035 | -0.911835 |
| O | 1.573859  | -0.204320 | 0.574836  |
| C | 2.494992  | -0.953412 | -0.050042 |
| O | 2.323210  | -1.432102 | -1.143674 |
| C | 3.725665  | -1.137605 | 0.794580  |
| C | 5.011170  | -1.321751 | -0.009410 |
| C | 5.385653  | -0.044459 | -0.754896 |
| C | 6.142867  | -1.770454 | 0.909074  |
| H | -4.399346 | -2.282160 | 1.042434  |
| H | -3.744009 | -0.170828 | -1.020100 |
| H | -2.257595 | 0.107377  | 2.784993  |
| H | -3.636778 | -0.983861 | 2.643760  |
| H | -2.595094 | -3.711803 | -0.267933 |
| H | -2.226470 | -2.883741 | 1.240187  |
| H | -3.880670 | 0.731943  | 2.980570  |
| H | -0.483937 | 1.175263  | 1.513360  |
| H | 0.450550  | 0.010739  | -1.145020 |
| H | -0.748815 | -1.242197 | 1.396687  |
| H | 2.330917  | 2.097208  | 1.319350  |
| H | 2.257126  | 3.712697  | 0.407760  |
| H | -2.724928 | 2.355153  | 1.407339  |
| H | -1.761093 | 0.997950  | -1.142017 |
| H | -3.645386 | 2.209940  | -0.081483 |
| H | -1.319212 | -3.008380 | -2.304537 |
| H | -0.375231 | -1.518569 | -2.337700 |
| H | -2.134067 | -1.459342 | -2.413709 |
| H | -4.314016 | -2.298630 | -1.766569 |

## References

1. Lee, K.H.; Min, Y.D.; Choi, S.Z.; Kwon, H.C.; Cho, O.R.; Lee, K.C.; Lee, K.R. *Arch. Pharm. Res.* **2004**, *27*, 1016-1019.
2. Vasas, A.; Lajter, I.; Kúsz, N.; Király, S.B.; Kovács, T.; Kurtán, T.; Bózsity, N.; Nagy, N.; Schelz, Z.; Zupkó, I.; Krupitza, G.; Frisch, R.; Mándi, A.; Hohmann, J. *Pharmaceutics* **2021**, *13*, 2088.
3. Raghavendra, S.; Tadiparthi, K.; Yadav, J.S. *Carbohydr. Res.* **2017**, *442*, 17-19.
4. Doboszewski, B.; Herdewijn, P. *Tetrahedron* **2008**, *64*, 5551-5562.
5. Ivanova, N.A.; Valiullina, Z.R.; Shitikova, O.V.; Miftakhov, M.S. *Russ. J. Org. Chem.* **2007**, *43*, 742-764.
6. Kohn, H.; Abuzar, S.; Korp, J.D.; Zektzer, A.S.; Martin, G.E. *J. Heterocyclic. Chem.* **1988**, *25*, 1511-1517.
7. Błoszyk, E.; Dudek, A.; Kosturkiewicz, Z.; Rychłewska, U.; Daniewski, W.M.; Gumulka, M.; Nawrot, J.; Buděšínský, M.; Vašíčková, S.; Holub, M. *Collect. Czech. Chem. Commun.* **1989**, *54*, 1903-1918.
8. Manchand, P.S.; Blount, J.F. *J. Org. Chem.* **1978**, *43*, 4352-4354.
9. Li, J.; Tang, H.; Kurtán, T.; Mándi, A.; Zhuang, C.L.; Su, L.; Zheng, G.L.; Zhang, W. *J. Nat. Prod.* **2018**, *81*, 1645-1650.
10. Kobayashi, S.; Lu, C.; Hoye, T.R.; Hillmyer, M.A. *J. Am. Chem. Soc.* **2009**, *131*, 7960-7961.
11. Nishida, T.; Satoh, K.; Kamigaito, M. *Molecules* **2020**, *25*, 5890.
12. CHESHIRE CCAT, The Chemical Shift Repository for computed NMR scaling factors, <http://cheshirenmr.info/index.htm>. (condition as of Oct. 5. 2018 was considered)
13. a) Rablen, P.R.; Pearlman, S.A.; Finkbiner, J. *J. Phys. Chem. A* **1999**, *103*, 7357-7363. b) Jain, R.J.; Bally, T.; Rablen, P. R. *J. Org. Chem.* **2009**, *74*, 4017-4023. c) Lodewyk, M.W.; Siebert, M.R.; Tantillo, D.J. *Chem. Rev.* **2012**, *112*, 1839-1862.
14. Konstantinov, I.A.; Broadbelt, L.J. *J. Phys. Chem. A* **2011**, *115*, 12364-12372.
15. Pierens, G.K. *J. Comput. Chem.* **2014**, *35*, 1388-1394.
16. Qiu, S.; de Gussem, E.; Tehrani, K.A.; Sergeyev, S.; Bultinck, P.; Herrebout, W. *J. Med. Chem.* **2013**, *56*, 8903-8914.
